# Supplementary material for: 12-h clock regulation of genetic information flow by XBP1s
Source: PubMed Central journal article supplement (PMC6959563; doi:10.1371/journal.pbio.3000580), 2020-01-14

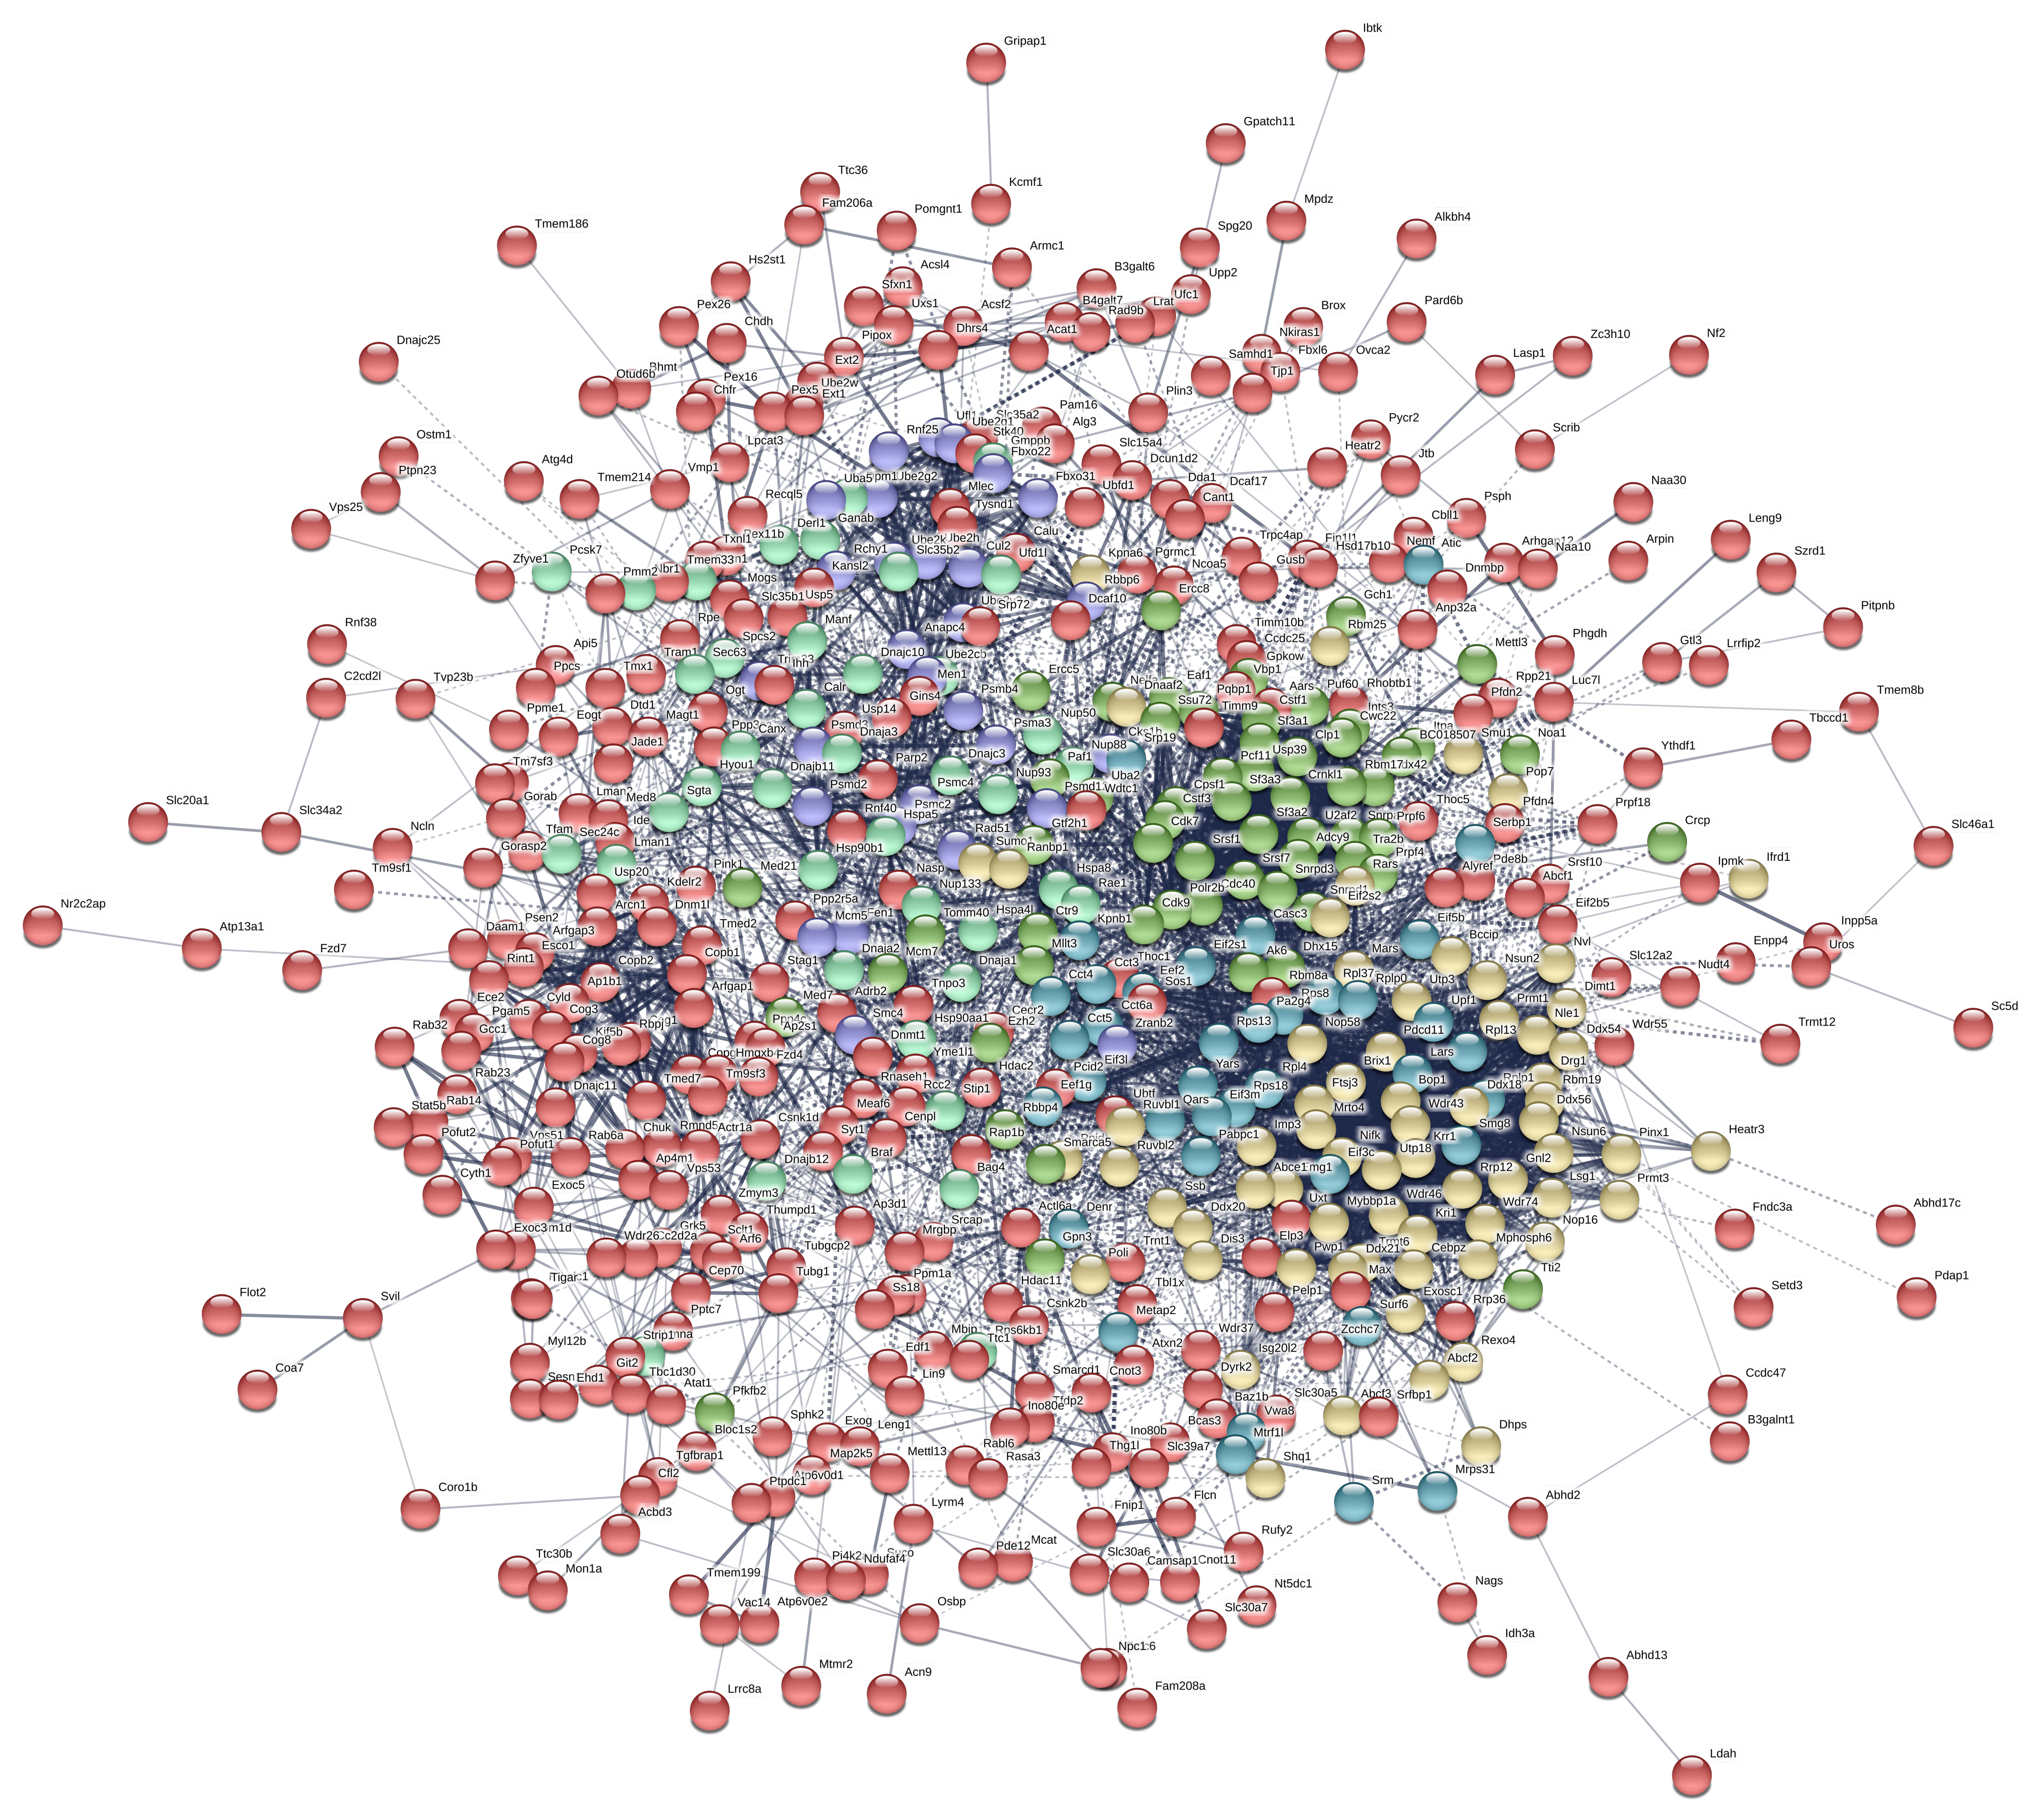

Supplement: pbio.3000580.s025.pdf [file pbio.3000580.s025.pdf]
