# Supplementary material for: 12-h clock regulation of genetic information flow by XBP1s
Source: PLoS Biol. 2020 Jan 14;18(1):e3000580. doi: 10.1371/journal.pbio.3000580 (PMC6959563; doi:10.1371/journal.pbio.3000580)
Supplement: S3 Table — Period, decay rate, biological phase (time of peak), and amplitude for each gene are provided as well as the mean value. Relative amplitude was calculated by normalizing the absolute amplitude to the mean. Tab 1: Basic statistics of distribution of period and decay rates for all oscillations. Tab 2: Genes in XBP1Flox mice. Tab 3: Genes in XBP1LKO mice. (XLSX) [file pbio.3000580.s010.xlsx]

## Sheet: Basic stats
Period						Confidence interval for arbitrarily-defined ~12h (10.5h to 13.5h) and circadian (21h to 25h) genes
	XBP1 Flox		XBP1 LKO				XBP1 Flox	XBP1 LKO
	Mean	Standard deviation	Mean	Standard deviation		~12h	1.1% ~ 99.9%	3.9% ~ 99.9%
~12h	11.6h	0.48h	11.4h	0.51h		Circadian	37.3% ~ 89.3%	28.1% ~ 83.4%
Circadian	21.8h	2.58h	22.5h	2.57h
Decay rate						Confidence interval for arbitrarily-defined oscillating genes (decay rate between 0.8~ 1.2)
	XBP1 Flox		XBP1 LKO				XBP1 Flox	XBP1 LKO
	Mean	Standard deviation	Mean	Standard deviation		~12h	7.5% ~ 90.3%	1.9% ~ 95.4%
~12h	1.01	0.146	1.02	0.106		Circadian	1.9% ~ 98.9%	0.6% ~ 99.7%
Circadian	0.99	0.092	0.99	0.076

## Sheet: WT all oscillations
period	biophase	decay rate	mean expression	relative amplitude	gene
5.5645	3.63466	0.925287	43.03	0.142147	Iyd
20.6179	13.3372	1.05932	43.03	0.0181362	Iyd
7.35362	3.14625	1.33392	43.03	0.0389184	Iyd
19.9494	3.63075	0.775273	0.368743	0.873261	Plekhg1
7.23184	2.96509	3.07407	0.368743	0.0255563	Plekhg1
5.60128	0.777472	1.42454	0.368743	0.0015499	Plekhg1
23.391	12.2104	0.980309	0.266128	0.87639	Mthfd1l
11.5217	0.753482	0.94827	0.266128	0.491536	Mthfd1l
4	0	1.14347	0.266128	0.0100159	Mthfd1l
16.2117	3.71879	0.962181	0.439709	0.358378	Akap12
4.5998	4.29531	0.978336	0.439709	0.127908	Akap12
5.46163	1.39698	0.896759	0.439709	0.554277	Akap12
25.1384	9.08139	1.0063	1.45212	0.146937	Zbtb2
5.22973	4.87915	1.0071	1.45212	0.0555042	Zbtb2
11.9797	7.07609	1.06885	1.45212	0.0549321	Zbtb2
21.8073	17.1065	1.05404	11.8677	0.0729518	Rmnd1
4.69283	2.59275	0.895039	11.8677	0.138052	Rmnd1
8.62423	6.32553	0.942559	11.8677	0.0484264	Rmnd1
11.5183	1.25804	1.00093	3.75628	0.114028	Armt1
21.1964	16.4241	1.08432	3.75628	0.0746927	Armt1
4	4.27883e-17	1.26948	3.75628	0.00824087	Armt1
4	2	5.40278	3.75628	0.092458	Armt1
21.4411	16.3125	1.00006	3.75872	0.497395	Esr1
11.2581	3.28122	1.08424	3.75872	0.093226	Esr1
4	4	1.64017	3.75872	0.111703	Esr1
22.1681	2.44073	1.0055	3.66359	0.446477	Syne1
12.9156	4.22776	1.00541	3.66359	0.084099	Syne1
4.55969	3.46803	1.04023	3.66359	0.057295	Syne1
6.93105	6.24827	0.994886	0.126049	0.201296	Syne1
9.8317	1.07076	1.02035	0.126049	0.091783	Syne1
23.205	3.32911	1.04189	0.126049	0.0766325	Syne1
7.42756	0.910223	0.961206	0.673914	0.156177	Myct1
16.7989	3.61861	0.86987	0.673914	0.461378	Myct1
4.62854	2.74444	0.861762	0.673914	0.266615	Myct1
34.7685	8.77063	0.901116	0.288098	0.54961	Fbxo5
7.30346	1.55344	0.872915	0.288098	0.421097	Fbxo5
4.21635	3.36253	1.45831	0.288098	0.518115	Fbxo5
10.6873	2.52355	0.970429	1.15383	0.177215	Mtrf1l
6.32538	0.266175	1.07684	1.15383	0.162786	Mtrf1l
21.671	15.8535	1.09235	1.15383	0.0540549	Mtrf1l
21.5699	0.643444	0.980999	2.14931	0.319394	Cnksr3
4.78161	1.92838	1.02718	2.14931	0.157322	Cnksr3
6.84536	6.42968	0.89527	2.14931	0.0445261	Cnksr3
17.9698	10.8838	1.11541	0.607914	0.0830724	Lrp11
10.1142	1.25632	1.30576	0.607914	0.186689	Lrp11
4.74592	1.11397	1.22354	0.607914	0.00981878	Lrp11
6.13666	5.13024	1.03506	8.87091	0.0427041	Pcmt1
10.6728	2.25337	0.833817	8.87091	0.189192	Pcmt1
4	2.05733e-17	0.969877	8.87091	0.00993329	Pcmt1
20.3309	18.8026	0.924752	1.08946	0.291185	A630066F11Rik
6.08355	2.24733	0.962635	1.08946	0.0526632	A630066F11Rik
11.3551	2.33767	1.08287	1.08946	0.0198727	A630066F11Rik
18.7882	4.69584	1.03711	1.56608	0.0677504	Nup43
8.37551	7.95232	1.81922	1.56608	0.395128	Nup43
5.00026	0.727271	1.45842	1.56608	0.0527941	Nup43
4.79309	0.684803	0.972634	0.603772	0.0897247	BC020402
7.06295	2.64531	0.945161	0.603772	0.134274	BC020402
15.6772	7.82685	1.16351	0.603772	0.00893001	BC020402
9.07376	2.79817	1.10943	4.05081	0.0468396	Lats1
5.23967	0.987769	1.15833	4.05081	0.0505229	Lats1
4	0	1.13543	4.05081	0.00080784	Lats1
5.2558	0.373156	0.98975	5.70408	0.03363	Katna1
20.0708	6.55555	1.03063	5.70408	0.0305147	Katna1
9.56189	2.1311	0.81943	5.70408	0.15572	Katna1
26.2251	13.2478	0.925073	18.8571	0.364476	Ginm1
10.9651	2.42791	0.91231	18.8571	0.316636	Ginm1
6.68001	0.155613	0.904958	18.8571	0.200486	Ginm1
19.9086	18.5345	0.989087	3.9078	0.126208	Ppil4
11.5517	0.859457	1.01255	3.9078	0.0756722	Ppil4
4.78382	3.25932	1.03367	3.9078	0.0197775	Ppil4
11.8386	4.91951	0.992948	1.02308	0.245966	Zc3h12d
22.9639	4.38214	0.966164	1.02308	0.626117	Zc3h12d
7.26389	5.50126	1.13914	1.02308	0.00600848	Zc3h12d
21.8509	1.37544	0.997312	14.1773	0.255326	Tab2
6.0113	2.91026	1.00489	14.1773	0.0121026	Tab2
8.29908	2.52854	1.0356	14.1773	0.0276951	Tab2
5.33621	2.65998	0.875151	0.117235	0.485809	Ust
15.0926	5.87749	1.12954	0.117235	0.0950171	Ust
4	2	1.4748	0.117235	0.00949551	Ust
12.1367	5.84741	0.998783	4.27607	0.178534	Sash1
31.1842	0.0730958	0.97547	4.27607	0.15243	Sash1
4	4	1.07145	4.27607	0.0239417	Sash1
20.3684	19.124	0.973382	1.40482	0.17851	Stxbp5
9.27029	0.596785	1.17202	1.40482	0.0537104	Stxbp5
5.73312	0.0419343	1.37465	1.40482	0.00113568	Stxbp5
6.00365	1.49028	0.709432	0.148229	2.2772	Adgb
18.8329	4.39924	0.894569	0.148229	0.709224	Adgb
4.40769	0.0499592	0.865318	0.148229	0.782714	Adgb
7.21724	1.97384	0.997256	10.9747	0.0702126	Rab32
23.3685	0.403186	0.983377	10.9747	0.31877	Rab32
12.1098	2.60208	1.1393	10.9747	0.00482896	Rab32
6.17891	1.19365	1.15169	1.72717	0.0846137	Shprh
10.1143	9.31454	1.66306	1.72717	0.0804337	Shprh
5.8509	0.706034	1.00483	1.26086	0.0977577	Fbxo30
7.15852	6.89569	0.986184	1.26086	0.0356501	Fbxo30
17.1421	13.5007	1.11239	1.26086	0.00667268	Fbxo30
23.6829	3.09338	1.02945	1.36801	0.170565	Epm2a
4.92614	2.26261	0.832269	1.36801	0.126445	Epm2a
7.17977	3.36004	1.06887	1.36801	0.0064677	Epm2a
13.8957	2.87664	0.975238	2.53222	0.176326	Utrn
8.34425	5.56523	1.15948	2.53222	0.0680497	Utrn
4	2	2.46899	2.53222	0.0078421	Utrn
4.88866	1.18543	0.997084	0.628745	0.100212	B230208H11Rik
10.9979	5.92081	0.957387	0.628745	0.346151	B230208H11Rik
8.54376	1.07723	1.1874	0.628745	0.0624948	B230208H11Rik
6.46281	0.782816	0.682759	0.148717	2.39996	Stx11
4.69471	3.26035	1.02375	0.148717	0.155103	Stx11
14.0951	5.91226	0.7858	0.148717	1.27317	Stx11
8.15991	0.830237	0.985221	34.6857	0.0684481	Sf3b5
20.2561	6.53981	0.928839	34.6857	0.1451	Sf3b5
4.76415	2.47812	1.09338	34.6857	0.000628129	Sf3b5
4.26214	1.30892	1.43405	0.232417	0.277989	Plagl1
6.61852	5.72561	1.19338	0.232417	0.019638	Plagl1
11.5693	2.4932	0.977482	5.41283	0.169566	Ltv1
7.40052	1.19253	0.610461	5.41283	0.455532	Ltv1
19.5719	8.05704	0.813469	5.41283	0.0997378	Ltv1
5.64829	1.67438	1.05478	0.543692	0.113738	Phactr2
5.36103	4.78654	2.84501	0.543692	0.108436	Phactr2
26.2993	6.19528	0.69969	2.16031	0.693772	Fuca2
4	4	1.23257	2.16031	0.00387471	Fuca2
4	2	2.92798	2.16031	0.00152539	Fuca2
11.4794	4.37062	3.15303	2.16031	0.00268752	Fuca2
23.1918	6.86007	1.05472	7.84009	0.124032	Pex3
4	4	1.02097	7.84009	0.0095159	Pex3
6.05939	5.99228	1.06578	7.84009	0.0401779	Pex3
21.501	3.09076	0.979389	0.871576	0.207984	Adat2
6.17177	4.99413	1.13385	0.871576	0.0600009	Adat2
9.7781	0.959331	1.3761	0.871576	0.0372044	Adat2
31.7912	7.27202	0.967325	4.52343	0.140494	Aig1
7.99054	2.87657	1.10323	4.52343	0.038436	Aig1
4.73672	1.09906	1.40435	4.52343	0.0168815	Aig1
7.9773	4.79824	1.01085	0.842482	0.113407	Hivep2
21.1035	13.6118	1.02394	0.842482	0.10363	Hivep2
4	2	0.542054	0.842482	0.327641	Hivep2
5.58162	2.238	0.985864	0.1437	0.259699	Adgrg6
11.8455	4.55631	1.01178	0.1437	0.21541	Adgrg6
4	4	0.975543	0.1437	0.0429179	Adgrg6
11.5762	1.49545	0.923215	6.74837	0.168777	Vta1
21.7226	5.84389	1.02986	6.74837	0.0504054	Vta1
5.8912	5.82203	1.07486	6.74837	0.0317022	Vta1
23.3569	0.391761	0.991746	16.0704	0.277106	Cited2
5.04421	1.87311	1.13413	16.0704	0.0925106	Cited2
7.38575	1.30633	1.02435	16.0704	0.0033432	Cited2
21.2067	7.58976	0.223589	0.240572	1831.73	Txlnb
7.21325	0.602589	0.236732	0.240572	1109.15	Txlnb
4	8.48465e-16	0.296688	0.240572	189.011	Txlnb
4	2	0.74417	0.240572	0.0917351	Txlnb
7.6461	2.79352	1.00779	5.14241	0.0317239	Heca
12.3555	6.39652	1.02788	5.14241	0.0907689	Heca
25.2358	5.63792	1.03856	5.14241	0.0930739	Heca
20.8069	6.9155	0.956867	5.59471	0.285864	Abracl
7.63868	0.502862	1.28682	5.59471	0.062738	Abracl
4	2	2.22986	5.59471	0.0469109	Abracl
4	2	1.05541	5.59471	0.000733772	Abracl
21.9912	6.29291	0.948504	5.75146	0.323235	Reps1
11.179	8.68195	1.01507	5.75146	0.0418138	Reps1
5.59533	2.57293	1.13748	5.75146	0.02431	Reps1
10.5744	7.47126	0.994519	4.44157	0.110748	Ccdc28a
21.3591	5.88649	0.958123	4.44157	0.462982	Ccdc28a
7.35769	3.26509	1.47304	4.44157	0.0607827	Ccdc28a
22.7261	21.9955	0.983774	1.72953	0.182473	Nhsl1
11.2012	1.68907	0.943469	1.72953	0.315746	Nhsl1
5.28599	3.60196	0.970629	1.72953	0.0698057	Nhsl1
14.0648	13.6968	1.05465	0.11302	0.151315	Hebp2
4	2	1.06109	0.11302	0.0225635	Hebp2
7.59468	4.66938	1.09369	0.11302	0.0390791	Hebp2
4	2	1.44275	0.11302	0.00328731	Hebp2
14.93	3.41697	0.987115	40.0904	0.0579041	Perp
6.10821	4.60536	0.979592	40.0904	0.0540796	Perp
4.63959	3.40129	1.03391	40.0904	0.0535921	Perp
5.54565	2.16747	0.913532	0.593242	1.33255	Tnfaip3
11.0183	2.40288	0.917424	0.593242	1.04021	Tnfaip3
4.57265	0.988439	0.837847	0.593242	1.23877	Tnfaip3
17.2048	4.79574	1.01725	5.41097	0.140721	Ifngr1
6.86509	1.32356	0.530002	5.41097	0.530485	Ifngr1
4	6.24105e-17	1.07399	5.41097	0.0188052	Ifngr1
5.77825	5.32199	0.88153	19.8035	0.157628	Pex7
4	2	0.11937	19.8035	0.395805	Pex7
19.758	9.25729	1.05694	19.8035	0.0189837	Pex7
21.8612	12.8071	1.02926	5.23606	0.184363	Map3k5
10.7242	1.55299	1.09949	5.23606	0.0574469	Map3k5
6.70979	3.47406	1.21458	5.23606	0.0114654	Map3k5
23.9852	21.8786	1.04529	7.78304	0.0987981	Map7
4	2	0.452339	7.78304	0.155245	Map7
5.73291	5.00186	1.54598	7.78304	0.0124102	Map7
4.27249	0.291015	1.01345	0.137763	0.323424	Gm6251
5.19022	1.98294	1.06969	0.137763	0.159822	Gm6251
24.7386	15.27	1.15777	0.137763	0.230188	Gm6251
21.9721	6.63409	0.982892	5.87515	0.195049	Bclaf1
5.98385	5.5289	1.00624	5.87515	0.0428808	Bclaf1
11.5668	10.2216	1.09165	5.87515	0.0240507	Bclaf1
11.9065	6.83161	0.977309	0.837335	0.219146	Pde7b
6.39071	5.2952	0.959096	0.837335	0.180309	Pde7b
28.9237	4.42471	1.02583	0.837335	0.11152	Pde7b
5.90997	1.07713	0.978823	0.217484	0.271712	Ahi1
14.9244	10.0698	2.03197	0.217484	0.220753	Ahi1
4	2	2.21637	0.217484	0.0136155	Ahi1
23.4571	8.25807	1.03381	15.7123	0.0523531	Hbs1l
5.66403	0.574576	0.916479	15.7123	0.070055	Hbs1l
9.25716	2.66975	0.992255	15.7123	0.00633782	Hbs1l
10.6055	7.72985	1.00649	132.414	0.0575184	Aldh8a1
30.4548	29.399	0.933585	132.414	0.110141	Aldh8a1
4.97095	3.29373	0.610733	132.414	0.230982	Aldh8a1
19.3764	1.50737	0.948892	3.64857	0.218913	Sgk1
5.39574	4.93965	1.16958	3.64857	0.1125	Sgk1
9.13635	0.272233	1.11788	3.64857	0.0448178	Sgk1
20.5863	20.5813	0.978003	1.56127	0.320256	E030030I06Rik
4	2.95076e-18	0.772689	1.56127	0.012458	E030030I06Rik
8.66893	7.94522	1.004	1.56127	0.000259703	E030030I06Rik
8.02947	3.79171	1.00253	0.274515	0.459875	Raet1a
24.9518	3.1278	1.00367	0.274515	0.399983	Raet1a
5.81536	4.13956	1.04208	0.274515	0.0249766	Raet1a
28.1094	27.0519	0.982535	1.56251	0.410973	Raet1e
6.26613	3.33997	0.947326	1.56251	0.402557	Raet1e
4.40491	2.46177	0.938806	1.56251	0.328791	Raet1e
23.743	3.42271	0.989614	0.416142	0.338981	Raet1c
11.2542	2.77105	1.02403	0.416142	0.173198	Raet1c
5.82754	3.68083	0.897116	0.416142	0.649651	Raet1c
46.2331	36.0029	0.830386	5.87271	3.12677	Raet1d
6.34022	3.68274	0.969262	5.87271	0.131628	Raet1d
4	4	0.881931	5.87271	0.128448	Raet1d
8.41197	2.16492	0.978104	1.47426	0.03968	Tbpl1
22.975	18.0033	1.06254	1.47426	0.0130652	Tbpl1
5.02353	1.11207	1.1017	1.47426	0.0102803	Tbpl1
4.3749	3.51069	1.03966	2.59916	0.0570916	Tcf21
21.8448	7.50613	1.0523	2.59916	0.0352445	Tcf21
9.26188	1.41925	1.59095	2.59916	0.112354	Tcf21
7.73729	2.50102	1.00715	123.808	0.044402	Rps12
13.3172	0.105461	0.976459	123.808	0.0722758	Rps12
4.88998	1.33833	0.964469	123.808	0.0345538	Rps12
22.1682	21.48	1.10627	1.19244	0.105808	Slc18b1
4	2	1.25176	1.19244	0.0455251	Slc18b1
6.17607	0.999806	1.5078	1.19244	0.00722836	Slc18b1
17.3127	0.795355	0.968232	27.282	0.159054	Vnn3
6.07997	5.07327	0.892619	27.282	0.198857	Vnn3
5.353	2.37396	0.702081	27.282	0.427763	Vnn3
6.09244	5.08353	0.979227	12.3404	0.219922	Vnn1
12.0252	5.88475	0.922884	12.3404	0.601525	Vnn1
26.1747	12.1064	1.07771	12.3404	0.0733423	Vnn1
14.2671	2.78108	0.570557	5.31169	0.880052	Stx7
27.5574	22.9289	1.20891	5.31169	0.014489	Stx7
5.62526	5.1301	1.72837	5.31169	0.0497808	Stx7
6.19277	1.62937	0.989389	12.9847	0.484542	Moxd1
41.4907	8.46189	1.03614	12.9847	0.391099	Moxd1
4.56627	0.230666	0.792497	12.9847	0.473409	Moxd1
21.7864	13.8822	1.02924	1.43895	0.229515	Ctgf
6.13978	0.794134	1.18159	1.43895	0.151929	Ctgf
4.4815	1.61488	1.18682	1.43895	0.0582617	Ctgf
20.7044	13.2102	1.05998	2.7474	0.0552621	Enpp1
5.41012	1.26299	0.857301	2.7474	0.0958094	Enpp1
10.4499	6.43726	1.10364	2.7474	0.0232242	Enpp1
23.5686	2.24919	0.994657	18.445	0.288013	Enpp3
11.863	7.35125	1.02074	18.445	0.152257	Enpp3
8.22381	3.15378	1.06505	18.445	0.0440464	Enpp3
11.7444	4.24302	1.01038	1.98072	0.0417574	Med23
21.5732	21.2956	0.874361	1.98072	0.27682	Med23
6.04417	2.35053	0.928249	1.98072	0.0798947	Med23
4.65121	2.78552	0.99372	627.742	0.0921587	Arg1
21.7124	16.3787	0.844613	627.742	0.108164	Arg1
12.3743	10.1955	1.08239	627.742	0.0151871	Arg1
4	1.31394e-17	1.00405	1.1613	0.0730682	Akap7
21.1833	10.2034	1.00723	1.1613	0.143943	Akap7
4	2	1.08697	1.1613	0.139487	Akap7
9.93354	6.4488	1.19273	1.1613	0.0838485	Akap7
17.3435	2.48539	0.987809	1.87998	0.187526	Epb4.1l2
5.66202	1.94188	0.885009	1.87998	0.277353	Epb4.1l2
4	1.08006e-15	1.29062	1.87998	7.32268e-05	Epb4.1l2
21.1928	5.70131	0.993847	30.6649	0.112226	Smlr1
10.9541	6.557	0.970974	30.6649	0.15607	Smlr1
5.94842	4.00162	0.954457	30.6649	0.139161	Smlr1
5.71757	1.04191	1.01117	0.992488	0.0603558	L3mbtl3
17.3104	10.113	1.13301	0.992488	0.0694632	L3mbtl3
4	2	1.1901	0.992488	0.00295736	L3mbtl3
22.6375	5.27407	0.905559	2.55186	0.617849	Arhgap18
5.6679	5.06985	1.52231	2.55186	0.0483571	Arhgap18
12.9525	7.98681	1.19328	2.55186	0.015673	Arhgap18
9.11967	6.58013	0.875517	0.144712	0.833716	Lama2
4	2	0.626339	0.144712	0.593754	Lama2
6.95745	2.04211	1.39175	0.144712	0.0062341	Lama2
26.6873	25.9719	0.930974	9.07404	0.275093	Ptprk
4	2	0.658161	9.07404	0.167896	Ptprk
11.7241	8.03974	1.04564	9.07404	0.0362156	Ptprk
23.6094	8.06522	0.982053	0.212137	0.722279	Themis
10.8547	6.98145	0.880508	0.212137	1.99724	Themis
4.44798	3.07707	0.933403	0.212137	0.971909	Themis
29.9941	1.21672	0.64816	20.0083	2.6002	Echdc1
7.27758	0.802126	1.02323	20.0083	0.0676271	Echdc1
4	7.21142e-16	0.927394	20.0083	0.000147037	Echdc1
21.8039	8.97174	0.98643	6.24158	0.0495758	Rnf146
6.38969	3.69425	0.935781	6.24158	0.0295309	Rnf146
9.65576	3.28861	0.983015	6.24158	0.00346876	Rnf146
21.9003	2.36353	0.908866	1.17557	0.473346	Rspo3
4	2	0.646738	1.17557	0.301856	Rspo3
4	4	1.15185	1.17557	0.0188462	Rspo3
9.2787	4.50773	1.18441	1.17557	0.033225	Rspo3
5.33637	4.08014	1.01051	0.30682	0.115147	Cenpw
13.3921	8.25511	0.889022	0.30682	0.304357	Cenpw
4	4	1.20367	0.30682	0.0199638	Cenpw
9.99207	3.24219	0.982424	1.18098	0.19341	Trmt11
5.39039	0.915289	0.958559	1.18098	0.322839	Trmt11
4	1.21978e-18	1.09175	1.18098	0.00603012	Trmt11
4	2	0.995234	4.43367	0.0268405	Gm20300
20.1604	3.12909	0.934707	4.43367	0.256043	Gm20300
4.48202	1.69354	1.3615	4.43367	0.0233064	Gm20300
13.5091	2.52278	0.837855	14.7998	0.186744	Hint3
4	4	0.880652	14.7998	0.0565907	Hint3
5.83232	0.388764	0.946365	14.7998	0.0351388	Hint3
9.60738	4.63922	0.88175	0.257897	0.294604	Ncoa7
6.005	4.93459	3.90363	0.257897	6.09756e-05	Ncoa7
6.5601	2.46214	0.897773	0.552284	0.343294	Hddc2
5.21674	3.36328	1.11456	0.552284	0.0831678	Hddc2
19.2452	15.7154	1.30959	0.552284	0.032073	Hddc2
4.78363	2.67735	1.00015	3.83468	0.08804	Tpd52l1
19.7887	11.3327	0.986997	3.83468	0.221389	Tpd52l1
7.93288	1.61028	1.05027	3.83468	0.019633	Tpd52l1
4.5772	3.91291	1.00631	0.134268	0.318815	Gm3258
5.55217	1.05594	1.04174	0.134268	0.0891895	Gm3258
33.4476	9.65413	1.15011	0.134268	0.0349391	Gm3258
4	1.82252e-17	0.882697	5.74195	0.108857	Rnf217
9.202	2.35262	1.05772	5.74195	0.102991	Rnf217
6.44953	6.36724	1.25959	5.74195	0.0128356	Rnf217
8.09235	7.82704	0.200256	0.177141	2703.76	Trdn
4	1.74509e-15	0.214142	0.177141	621.373	Trdn
4	2	0.0407751	0.177141	252.032	Trdn
4.62577	3.14543	0.878051	0.806093	0.576917	Zufsp
4	2	0.802511	0.806093	0.457755	Zufsp
16.455	7.30725	0.938757	0.806093	0.18514	Zufsp
4	7.60655e-17	0.165259	0.806093	1.01978	Zufsp
13.4737	2.62456	0.979872	13.784	0.0218434	Rwdd1
4	2	0.573222	13.784	0.0191803	Rwdd1
8.4298	4.96645	1.04212	13.784	0.00149725	Rwdd1
23.1179	5.07963	0.942191	0.868638	0.634349	Fam26f
10.86	6.67612	0.949281	0.868638	0.340413	Fam26f
5.7404	1.44732	0.862715	0.868638	0.466757	Fam26f
17.6353	2.84238	0.97393	0.910721	0.362728	Dse
5.76396	1.41861	0.903411	0.910721	0.36849	Dse
10.6221	1.38924	0.947604	0.910721	0.0448802	Dse
11.0402	5.72076	1.00985	7.65785	0.0252846	Tspyl1
23.3734	2.04266	0.909232	7.65785	0.215141	Tspyl1
6.45299	2.87169	1.11507	7.65785	0.0080762	Tspyl1
24.5106	22.4439	0.967083	1.07025	0.822885	Tspyl4
4	2	0.989592	1.07025	0.0947914	Tspyl4
4.61936	3.21099	0.964768	1.07025	0.310218	Tspyl4
24.1902	5.31602	1.04792	4.52731	0.0455429	Nt5dc1
11.833	5.68719	1.18299	4.52731	0.0198086	Nt5dc1
6.20948	3.29539	1.13698	4.52731	0.00723016	Nt5dc1
21.343	17.6866	0.988209	0.738783	0.126164	Frk
4	2	0.222025	0.738783	0.735872	Frk
6.15367	5.32907	1.12088	0.738783	0.00312617	Frk
11.2992	1.32065	1.01468	7.79158	0.0392147	Hdac2
18.5306	15.1763	1.14549	7.79158	0.0235057	Hdac2
4.50939	1.33156	1.12285	7.79158	0.0110823	Hdac2
19.5078	2.55084	0.892187	2.28198	0.557198	Marcks
5.77838	1.40722	0.902698	2.28198	0.326387	Marcks
11.7088	2.54677	1.02434	2.28198	0.0257346	Marcks
12.494	5.31098	0.89749	0.456558	0.461212	Lama4
6.15145	0.791123	0.897305	0.456558	0.343285	Lama4
27.001	18.9793	1.19491	0.456558	0.020344	Lama4
4	2	0.987004	0.159185	0.26593	Fam229b
4.92244	2.32439	1.02761	0.159185	0.277704	Fam229b
4	4	0.53634	0.159185	0.922045	Fam229b
14.0179	7.43183	1.18066	0.159185	0.0304997	Fam229b
21.4568	5.12831	0.989138	0.259985	0.499797	Tube1
11.9868	7.68491	0.962397	0.259985	0.176368	Tube1
4.88827	3.29453	1.04971	0.259985	0.0762645	Tube1
6.27006	5.84803	1.00119	0.152243	0.170454	Wisp3
20.7486	9.04066	1.02083	0.152243	0.318675	Wisp3
4.50977	3.2837	1.05323	0.152243	0.0771328	Wisp3
4	0	1.00244	1.40352	0.0884099	Fyn
16.1118	3.81367	0.829259	1.40352	0.546565	Fyn
5.79074	1.27689	0.870054	1.40352	0.36857	Fyn
21.7997	1.34767	0.998911	1.11593	0.324789	Traf3ip2
6.91064	1.33443	1.00924	1.11593	0.0678279	Traf3ip2
11.6867	2.34471	1.02786	1.11593	0.141801	Traf3ip2
10.3025	6.66245	0.99935	0.255726	0.225969	E130307A14Rik
23.0824	5.25118	0.922997	0.255726	0.724342	E130307A14Rik
5.0769	3.06899	1.02925	0.255726	0.0702309	E130307A14Rik
16.8897	0.605437	0.921951	1.32853	0.161411	Rev3l
8.09452	6.82862	1.0781	1.32853	0.050464	Rev3l
6.47674	2.55848	1.26452	1.32853	0.0155585	Rev3l
5.96231	1.10498	1.0097	0.503085	0.0805159	AA474331
19.5726	18.1935	0.857545	0.503085	0.736268	AA474331
11.6963	6.17051	0.97394	0.503085	0.128285	AA474331
22.319	1.27871	0.95487	6.58837	0.370912	G630090E17Rik
12.3447	1.68752	0.978232	6.58837	0.0724674	G630090E17Rik
5.43185	1.26786	0.968379	6.58837	0.0650282	G630090E17Rik
21.75	21.3694	0.916844	0.962233	0.16942	BC021785
6.32533	5.82732	4.68391	0.962233	0.00608223	BC021785
4	2	2.73771	0.962233	0.000622522	BC021785
5.95546	5.46519	1.50393	13.947	0.176093	AI317395
19.6023	6.46976	1.10614	13.947	0.0209695	AI317395
4	4.52838e-16	1.17195	13.947	0.000567536	AI317395
5.36695	1.26268	0.983554	17.8693	0.0848199	Slc16a10
11.5007	0.658722	0.972069	17.8693	0.101861	Slc16a10
18.4113	16.8447	1.04382	17.8693	0.108271	Slc16a10
12.1634	0.881224	0.977905	3.25721	0.151401	Rpf2
4	2	1.24328	3.25721	0.0198009	Rpf2
5.33477	5.20339	1.03143	3.25721	0.00457296	Rpf2
12.3564	1.57474	0.967532	8.0894	0.0921024	Gtf3c6
20.1423	2.46139	1.05869	8.0894	0.0677906	Gtf3c6
7.5111	0.206179	1.1091	8.0894	0.0618453	Gtf3c6
8.94669	4.32461	0.986437	0.831892	0.968595	Amd1
22.8051	16.2546	0.919954	0.831892	2.61929	Amd1
5.01679	2.22957	0.974049	0.831892	0.805152	Amd1
10.7683	10.4951	1.04778	8.44526	0.126976	Amd2
22.4409	12.1105	1.07166	8.44526	0.174881	Amd2
4	2	1.05007	8.44526	0.0134793	Amd2
4	2	4.28126	8.44526	0.0155807	Amd2
11.9571	6.08092	1.00067	0.987956	0.138271	Cdk19
25.7475	5.61544	1.01141	0.987956	0.120313	Cdk19
7.07212	2.42456	1.04436	0.987956	0.0271802	Cdk19
10.1311	3.46046	0.999739	5.29892	0.0749832	Ddo
24.4544	14.198	1.02498	5.29892	0.241073	Ddo
5.72066	2.20961	1.12171	5.29892	0.0570529	Ddo
23.7249	7.06391	1.06337	5.13729	0.0334115	Cdc40
11.8531	8.24189	1.06458	5.13729	0.02741	Cdc40
4	2	1.11917	5.13729	0.0246832	Cdc40
4	4	1.44429	5.13729	0.00034191	Cdc40
21.1769	18.2108	0.969259	0.559907	0.519873	Wasf1
4	2	1.00971	0.559907	0.039496	Wasf1
5.00855	3.89302	1.07823	0.559907	0.142877	Wasf1
4	2	2.32124	0.559907	0.213925	Wasf1
5.7222	1.06056	0.992479	3.44005	0.0654876	Fig4
4.13442	1.1415	0.989402	3.44005	0.0358919	Fig4
17.7285	12.7287	1.05592	3.44005	0.0152832	Fig4
22.5231	19.7531	1.00341	3.62624	0.0754941	Zbtb24
11.3067	1.34971	1.00366	3.62624	0.0650688	Zbtb24
5.99522	3.50755	1.15809	3.62624	0.0352101	Zbtb24
6.60771	1.86263	1.02313	0.267225	0.350995	Mical1
22.7753	3.22589	0.947318	0.267225	0.448923	Mical1
11.0098	4.46298	1.02926	0.267225	0.0563501	Mical1
11.6431	0.154485	0.958136	12.3548	0.116019	Smpd2
4.37674	3.49646	4.4274	12.3548	0.329529	Smpd2
14.9745	7.31298	1.24535	0.160716	0.187455	Ppil6
6.08458	5.6631	1.63821	0.160716	0.0562071	Ppil6
4	2	1.59109	0.160716	4.05701e-05	Ppil6
24.5141	0.529267	0.953391	86.3006	0.222807	Cd164
5.71115	1.41397	0.893627	86.3006	0.0733342	Cd164
10.6929	1.69593	0.942337	86.3006	0.0327544	Cd164
23.0145	3.07757	0.994414	0.668505	0.371514	Ccdc162
7.40667	1.34916	1.02	0.668505	0.0472604	Ccdc162
5.64391	0.373147	1.0276	0.668505	0.045421	Ccdc162
20.0506	4.84125	1.03163	0.739955	0.152905	5730435O14Rik
10.1172	2.09937	0.989813	0.739955	0.0212132	5730435O14Rik
4	4	0.256082	0.739955	0.236797	5730435O14Rik
10.1953	9.11002	0.963973	1.0473	0.155501	Cep57l1
22.0981	6.74449	0.878094	1.0473	0.408488	Cep57l1
4	4	0.78829	1.0473	0.350351	Cep57l1
4	2	0.571233	1.0473	0.440425	Cep57l1
22.7186	4.93578	0.929298	3.59218	0.255887	Sesn1
10.8695	7.98583	1.02603	3.59218	0.07162	Sesn1
6.04046	1.2028	1.03633	3.59218	0.0022315	Sesn1
6.15993	1.4859	0.989347	8.48796	0.198614	Foxo3
10.4697	2.43123	0.978676	8.48796	0.0635702	Foxo3
19.4103	13.5283	1.05752	8.48796	0.0784293	Foxo3
13.8324	3.46633	0.826291	3.19314	0.235384	Lace1
4	4	0.965048	3.19314	0.0155016	Lace1
6.14385	0.814593	1.60289	3.19314	0.0375282	Lace1
20.413	19.8718	1.04626	51.1573	0.0798077	Snx3
4.88557	3.35482	1.04696	51.1573	0.0392179	Snx3
7.98525	7.97607	1.50516	51.1573	0.0292547	Snx3
5.64606	0.325998	0.957247	3.40354	0.120776	Ostm1
11.343	1.03398	0.954733	3.40354	0.110011	Ostm1
25.8096	10.7712	0.947192	3.40354	0.0993492	Ostm1
25.6746	23.794	0.964327	19.9338	0.116903	Sec63
12.2386	1.50207	1.05132	19.9338	0.033515	Sec63
5.53381	1.52924	1.2958	19.9338	0.0297042	Sec63
26.0561	0.0661982	0.96174	3.75354	0.167624	Pdss2
11.7262	5.95562	1.08399	3.75354	0.0252	Pdss2
6.78048	3.99938	1.09247	3.75354	0.00557146	Pdss2
7.58719	4.89498	1.03695	1.13767	0.0508511	Bend3
17.2017	3.31956	1.10057	1.13767	0.0680708	Bend3
4.49817	0.643531	1.12867	1.13767	0.00628353	Bend3
8.36196	0.149369	0.973403	12.2582	0.120625	1700021F05Rik
19.2081	7.61926	0.932656	12.2582	0.301318	1700021F05Rik
9.37547	2.26494	0.907743	12.2582	0.169483	1700021F05Rik
4	2	0.991415	1.71581	0.0802249	Cd24a
7.03193	6.63773	0.96404	1.71581	0.119711	Cd24a
4	2	3.22603	1.71581	0.0209245	Cd24a
11.153	1.87788	0.947418	1.68597	0.293528	Qrsl1
5.3473	0.581038	1.5198	1.68597	0.0876985	Qrsl1
17.7856	11.6151	1.21133	1.68597	0.0212343	Qrsl1
5.20023	1.89247	1.06446	7.25644	0.0417991	Rtn4ip1
24.6383	18.4556	1.05499	7.25644	0.0224547	Rtn4ip1
5.94639	0.766982	1.19162	7.25644	0.0187185	Rtn4ip1
23.6281	9.05869	0.979183	3.05967	0.227367	Aim1
7.4077	1.37787	1.01751	3.05967	0.098847	Aim1
14.3977	3.42628	0.957351	3.05967	0.127807	Aim1
19.9386	5.22523	0.833426	15.2623	0.219878	Atg5
4	4	0.834411	15.2623	0.0806144	Atg5
5.39573	1.52739	0.873999	15.2623	0.110192	Atg5
22.6415	14.985	0.988152	14.1644	0.11581	Prep
12.7651	0.946469	1.04609	14.1644	0.0502036	Prep
6.88488	6.16212	1.19915	14.1644	0.0110297	Prep
27.3288	2.29319	0.954492	0.481531	0.186065	Hace1
10.4809	7.37224	1.02014	0.481531	0.0500852	Hace1
5.54227	2.44931	1.02187	0.481531	0.0502366	Hace1
13.1661	2.2449	1.00492	3.66666	0.0795398	Ascc3
8.75545	2.44132	1.04971	3.66666	0.0242313	Ascc3
4	1.98366e-16	1.28393	3.66666	0.000517404	Ascc3
34.9459	31.633	0.975227	0.591037	0.416357	Lilr4b
10.4356	6.56646	0.831534	0.591037	0.862102	Lilr4b
5.7903	1.46914	0.876747	0.591037	0.51379	Lilr4b
30.3495	1.23501	0.958592	1.24455	0.39273	Lilrb4a
5.96795	1.54536	0.96855	1.24455	0.2871	Lilrb4a
9.43361	7.10539	0.971348	1.24455	0.22986	Lilrb4a
20.4025	7.8427	0.112057	0.139419	29745.9	Vgll2
6.79019	1.12994	0.111815	0.139419	24379.4	Vgll2
4	4	0.113248	0.139419	10014.3	Vgll2
4	4	1.02955	0.139419	8.70179e-08	Vgll2
5.73895	0.826678	0.917815	0.877794	0.161967	Dcbld1
5.86832	5.0436	1.86527	0.877794	0.005329	Dcbld1
19.1375	17.133	0.979498	5.82422	0.127213	Gopc
7.01973	1.73223	0.381228	5.82422	0.628272	Gopc
6.89594	0.0593289	0.868958	5.82422	0.0755097	Gopc
13.0236	1.11438	0.864405	8.7262	0.259938	Nus1
5.61895	5.41352	2.18077	8.7262	0.058788	Nus1
42.7311	15.932	1.2298	8.7262	0.00256475	Nus1
6.08377	5.43853	1.00871	2.85907	0.124728	Cep85l
17.886	15.6922	0.949343	2.85907	0.337301	Cep85l
4.25164	2.65696	0.887394	2.85907	0.388407	Cep85l
7.87393	4.27867	0.857961	0.680436	0.323575	Mcm9
24.5823	24.3214	0.872675	0.680436	0.27672	Mcm9
9.78343	8.06598	0.813978	0.680436	0.278391	Mcm9
5.92735	5.31702	0.9362	2.20924	0.0849811	Asf1a
15.3555	7.69229	0.877681	2.20924	0.15303	Asf1a
8.17311	2.30741	0.722098	2.20924	0.18218	Asf1a
11.6516	0.549131	0.513342	0.142803	4.54666	Fam184a
4	2	33.7467	0.142803	7.90268	Fam184a
7.63172	2.53904	3.92627	0.142803	1.11662	Fam184a
17.0479	1.27368	0.968793	38.2727	0.187667	Man1a
4	2	0.862582	38.2727	0.0473902	Man1a
7.71938	1.87072	1.09158	38.2727	0.000548657	Man1a
4	3.45204e-17	1.17834	38.2727	8.83727e-05	Man1a
23.9843	5.83824	0.97255	0.343824	0.824823	Gm16998
11.4083	6.43736	0.955745	0.343824	0.755212	Gm16998
6.1071	1.18855	0.954236	0.343824	0.225268	Gm16998
17.6299	12.0615	1.08303	0.630922	0.0173259	Tbc1d32
4	1.82944e-17	1.0498	0.630922	0.00467671	Tbc1d32
5.91549	0.111017	1.23697	0.630922	0.022393	Tbc1d32
20.6783	4.86316	0.99147	0.430568	0.29071	Msl3l2
5.27391	2.91513	0.966408	0.430568	0.146708	Msl3l2
9.88909	5.51634	0.962642	0.430568	0.0938875	Msl3l2
5.65566	0.15333	1.21251	0.611813	0.143134	Gja1
4	1.94412e-17	1.2322	0.611813	0.045571	Gja1
16.9774	16.3635	1.23134	0.611813	0.0594698	Gja1
18.835	2.69486	0.979648	5.26694	0.137287	Hsf2
7.95671	0.828539	1.09461	5.26694	0.100284	Hsf2
5.00918	2.88775	1.07688	5.26694	0.00795889	Hsf2
25.5599	6.84875	1.04549	41.9251	0.0412671	Serinc1
4.90165	1.34157	1.32409	41.9251	0.0235898	Serinc1
8.53505	1.56086	1.26226	41.9251	0.00361043	Serinc1
24.1512	2.67302	0.924951	1.13892	0.67692	Fabp7
8.6703	7.51743	0.966366	1.13892	0.275341	Fabp7
4.27613	2.83393	0.971848	1.13892	0.000207461	Fabp7
13.535	0.795884	1.27822	16.0307	0.0624621	Smpdl3a
5.69616	4.92787	1.98805	16.0307	0.0132508	Smpdl3a
45.5037	34.1624	0.945054	3.32302	0.196626	Gcc2
6.02506	1.45721	1.05292	3.32302	0.0440867	Gcc2
7.98273	5.66841	1.03057	3.32302	0.0227249	Gcc2
5.34023	1.61527	0.94596	2.39057	0.118708	Lims1
20.0276	2.87922	0.843777	2.39057	0.296426	Lims1
5.61592	3.03777	1.23496	2.39057	0.0234397	Lims1
16.2818	0.375448	0.87125	7.57333	0.24491	Ranbp2
11.22	10.5063	1.04186	7.57333	0.0413974	Ranbp2
4.36385	2.41429	0.955548	7.57333	0.0267713	Ranbp2
12.0614	8.54734	1.00407	0.619403	0.0839535	Ccdc138
20.3189	1.11003	0.98255	0.619403	0.119017	Ccdc138
4	4	1.08778	0.619403	0.0621584	Ccdc138
11.2973	6.84825	0.998188	2.58088	0.116911	43718
25.7939	1.70942	0.967752	2.58088	0.16917	43718
4.41634	2.46923	1.11814	2.58088	0.022689	43718
20.3556	20.2724	0.999631	1.24693	0.183135	Sowahc
5.68012	1.63747	0.955327	1.24693	0.120679	Sowahc
6.97368	0.875022	1.04146	1.24693	0.0623918	Sowahc
9.25284	4.74196	0.999524	2.13607	0.16901	P4ha1
21.1835	17.5873	1.00532	2.13607	0.459234	P4ha1
4.72723	0.00113324	1.05886	2.13607	0.189956	P4ha1
21.9227	3.24043	0.987574	23.5204	0.245469	Pla2g12b
5.67817	3.56327	0.927	23.5204	0.102807	Pla2g12b
8.07923	3.01723	1.25545	23.5204	0.000498952	Pla2g12b
25.226	0.441735	0.862723	4.36205	0.811984	Oit3
5.39514	1.65811	1.09557	4.36205	0.0669878	Oit3
4	4	1.08932	4.36205	0.00777851	Oit3
22.3506	2.37978	0.972265	6.12867	0.507332	Mcu
4.55891	3.81269	0.982265	6.12867	0.0347308	Mcu
8.77993	3.46477	1.21522	6.12867	0.00606641	Mcu
21.9147	5.50844	0.981771	7.72601	0.226276	Micu1
4	4	1.01919	7.72601	0.0185549	Micu1
8.31485	1.26767	1.14249	7.72601	0.0123087	Micu1
4	2	1.9666	7.72601	5.75832e-05	Micu1
11.1746	5.41515	0.989541	22.8213	0.0281151	Dnajb12
34.6744	29.3421	0.963172	22.8213	0.0617044	Dnajb12
7.15138	3.01745	1.05147	22.8213	0.00443434	Dnajb12
21.3694	19.4405	0.997723	4.60723	0.656571	Ddit4
8.34776	7.60995	1.12245	4.60723	0.127772	Ddit4
4	4	1.00525	4.60723	0.000116884	Ddit4
20.4704	0.25296	1.01566	14.001	0.0619638	Anapc16
6.31943	3.64793	0.957652	14.001	0.0823213	Anapc16
11.204	10.0833	0.982194	14.001	0.0191991	Anapc16
19.6937	8.00666	0.932182	6.65927	0.125444	Ascc1
4	2	1.14397	6.65927	0.00968011	Ascc1
7.58284	2.76262	3.02307	6.65927	0.101345	Ascc1
25.8553	11.625	1.03296	0.228274	0.368472	Spock2
7.5102	5.2424	0.856891	0.228274	1.12352	Spock2
8.49129	2.35424	1.05123	0.228274	0.132143	Spock2
14.5639	3.32833	0.958038	138.99	0.0778292	Psap
4	2	1.09221	138.99	0.0114487	Psap
6.19289	0.464775	1.68751	138.99	0.0068989	Psap
6.17951	0.605483	0.854596	0.82867	0.45739	4632428N05Rik
13.5817	3.52224	0.580948	0.82867	1.18921	4632428N05Rik
18.0164	0.559751	1.10425	0.82867	0.0417057	4632428N05Rik
6.0998	0.613533	0.93003	1.33365	0.176518	Slc29a3
38.7496	11.6581	1.59881	1.33365	0.058992	Slc29a3
5.44651	2.24714	2.81581	1.33365	0.0017199	Slc29a3
22.0494	13.7789	1.0555	0.70951	0.2277	Unc5b
4	2	0.810313	0.70951	0.168587	Unc5b
7.30909	2.72894	1.17747	0.70951	0.00964554	Unc5b
4	2	4.9197	0.70951	0.0339588	Unc5b
20.8813	1.34227	0.974525	198.787	0.09798	Pcbd1
8.48079	7.06887	1.01186	198.787	0.0260201	Pcbd1
6.44882	3.42256	0.945261	198.787	0.100519	Pcbd1
6.9298	2.40928	0.995109	13.996	0.0814997	Sgpl1
23.1032	21.6177	0.945849	13.996	0.495803	Sgpl1
10.8731	6.25896	1.01901	13.996	0.0784624	Sgpl1
25.5412	9.04392	1.025	0.20655	0.0701574	Adamts14
12.4544	3.18947	0.800327	0.20655	0.512667	Adamts14
5.25881	3.31122	1.02239	0.20655	0.0339013	Adamts14
23.831	3.50293	0.926438	2.16211	0.335029	Pald1
7.10248	2.22623	1.0424	2.16211	0.135435	Pald1
11.8855	8.75213	0.370929	2.16211	1.34666	Pald1
10.9158	7.15543	0.978982	0.172591	0.129604	Nodal
4.78847	1.75772	0.985528	0.172591	0.0283828	Nodal
20.9392	4.22207	0.848307	0.172591	0.0517868	Nodal
12.5494	1.33528	1.02624	47.0188	0.121802	Eif4ebp2
6.90373	6.548	1.13713	47.0188	0.0675958	Eif4ebp2
16.6033	8.0294	1.15779	47.0188	0.016327	Eif4ebp2
9.67984	7.9406	0.960077	2.03934	0.158471	Lrrc20
19.7883	5.37846	0.887494	2.03934	0.418239	Lrrc20
5.13805	0.702719	0.839883	2.03934	0.192675	Lrrc20
4	4	0.956445	93.0734	0.117817	Ppa1
22.6772	19.9873	0.932796	93.0734	0.226675	Ppa1
4	2	0.658457	93.0734	0.203356	Ppa1
6.81005	0.258748	1.06386	93.0734	0.0317816	Ppa1
5.53713	0.408845	1.00289	19.1023	0.0304186	Sar1a
11.5428	1.95633	0.956226	19.1023	0.128525	Sar1a
21.9225	15.6367	1.04497	19.1023	0.0451419	Sar1a
24.0922	17.2923	1.00011	33.5858	0.116516	Tysnd1
11.9696	0.494244	1.01018	33.5858	0.0842597	Tysnd1
6.20056	4.04144	0.978167	33.5858	0.0722532	Tysnd1
22.2805	13.721	1.01123	9.12673	0.27468	Aifm2
4.72266	2.88409	0.964799	9.12673	0.101136	Aifm2
8.15767	4.46011	1.62175	9.12673	0.0938124	Aifm2
27.3011	12.106	1.20854	0.406675	0.103133	H2afy2
4	2	1.32595	0.406675	0.0213088	H2afy2
7.72082	3.68118	1.38702	0.406675	0.00444228	H2afy2
4	2	1.75098	0.406675	0.00186952	H2afy2
4.67255	2.22083	0.984832	0.618839	0.174544	Col13a1
17.9593	0.589051	1.06223	0.618839	0.184799	Col13a1
6.66305	5.01227	1.09873	0.618839	0.00877318	Col13a1
23.0383	5.0939	0.959899	0.842003	0.733725	2010107G23Rik
4.32749	3.04209	0.698301	0.842003	2.04219	2010107G23Rik
9.97188	7.84459	0.94403	0.842003	0.352412	2010107G23Rik
5.64499	0.366093	0.983698	0.495093	0.454597	Tspan15
18.1399	4.62053	0.777522	0.495093	0.979802	Tspan15
11.8739	2.52037	1.18467	0.495093	0.0176728	Tspan15
16.6324	3.08094	0.938289	0.904027	0.236396	Hk1
4	2	0.800029	0.904027	0.0868061	Hk1
6.02955	5.58402	3.28298	0.904027	0.0479517	Hk1
9.60011	3.8919	0.915503	5.37133	0.120686	Supv3l1
5.40006	0.818314	0.92768	5.37133	0.0835418	Supv3l1
24.9853	13.0585	1.05126	5.37133	0.0433277	Supv3l1
8.28544	1.63742	0.893875	0.2842	0.175622	4930507D05Rik
4.72344	3.12377	1.05177	0.2842	0.037657	4930507D05Rik
14.8269	2.53153	1.11198	0.2842	0.00994073	4930507D05Rik
24.0545	13.2124	1.02334	10.1116	0.0501856	Vps26a
5.99441	4.26681	1.02812	10.1116	0.0450345	Vps26a
11.27	10.8106	1.05006	10.1116	0.0538021	Vps26a
4.79107	3.25897	1.01587	3.99849	0.0787496	Srgn
7.17479	0.141064	0.87726	3.99849	0.605088	Srgn
15.2316	4.2725	0.677393	3.99849	1.42016	Srgn
4.49517	1.33387	1.21223	4.42725	0.0242904	Kif1bp
13.7711	9.49375	1.05504	4.42725	0.00458322	Kif1bp
9.70739	1.76569	1.12329	4.42725	0.00776853	Kif1bp
11.8312	0.568977	0.987876	6.03616	0.171977	Ddx21
20.2982	17.6263	0.976793	6.03616	0.182764	Ddx21
4.34308	2.1571	1.0125	6.03616	0.0676007	Ddx21
11.8655	1.30033	1.00255	10.6834	0.0644684	Ddx50
20.9298	18.5466	0.98652	10.6834	0.0856346	Ddx50
5.98376	0.388656	0.933637	10.6834	0.0454435	Ddx50
21.3639	16.8726	1.0118	5.56852	0.143795	Ccar1
10.0484	2.99886	1.00821	5.56852	0.040249	Ccar1
4.54181	0.614695	1.0926	5.56852	0.034948	Ccar1
6.17325	5.18469	1.00575	18.2013	0.0650449	Slc25a16
17.6856	15.3624	1.03144	18.2013	0.0255166	Slc25a16
4.98569	3.06007	1.08728	18.2013	0.029944	Slc25a16
11.9942	11.8451	0.930172	1.7875	0.127206	Dna2
4.77398	0.424449	1.04239	1.7875	0.042842	Dna2
7.21161	3.53449	1.10321	1.7875	0.0202928	Dna2
5.91844	1.2648	1.00821	0.673492	0.0755398	Rufy2
19.0053	6.14717	0.943289	0.673492	0.203593	Rufy2
11.9263	11.3969	1.02167	0.673492	0.0251354	Rufy2
8.66317	7.23219	0.984433	2.86843	0.100805	Hnrnph3
4	2	0.76098	2.86843	0.0949848	Hnrnph3
4	2	1.36331	2.86843	0.0103361	Hnrnph3
21.8788	6.12438	1.16678	2.86843	0.001225	Hnrnph3
4	4	0.944623	49.4768	0.0578007	Pbld2
6.6652	3.85776	0.943595	49.4768	0.0776659	Pbld2
16.0263	1.19859	1.26171	49.4768	0.0130578	Pbld2
4	4	1.58526	49.4768	0.0029877	Pbld2
23.6245	9.63079	1.01495	74.6668	0.187702	Pbld1
5.64401	5.63182	0.952683	74.6668	0.0865072	Pbld1
12.9866	6.21576	1.0436	74.6668	0.0767662	Pbld1
10.1974	7.3811	0.539442	0.116391	50.1817	Mypn
5.25429	2.33644	0.569543	0.116391	18.4766	Mypn
12.1311	5.23634	0.95932	8.45831	0.0530647	Herc4
26.5997	25.9806	0.886873	8.45831	0.11347	Herc4
6.73939	2.43167	1.02867	8.45831	0.0181413	Herc4
20.3729	14.8177	1.02383	1.75533	0.0349736	Sirt1
6.14218	5.7379	1.04604	1.75533	0.0229031	Sirt1
4.53187	1.72084	1.08593	1.75533	0.0167047	Sirt1
4	2	0.972405	4.58927	0.08201	Dnajc12
17.3025	14.0913	1.28525	4.58927	0.069378	Dnajc12
5.65369	5.12918	2.49192	4.58927	0.14023	Dnajc12
4.36093	2.32258	1.00391	16.0943	0.058487	Reep3
18.7493	18.0445	0.960297	16.0943	0.168672	Reep3
9.94765	5.71342	1.01798	16.0943	0.0238939	Reep3
20.6107	19.1695	0.897711	3.98086	0.468115	Jmjd1c
5.19426	3.189	1.1206	3.98086	0.189267	Jmjd1c
9.01251	5.18795	1.04266	3.98086	0.0648885	Jmjd1c
16.4979	4.36675	0.96788	11.9225	0.0827963	Nrbf2
11.4868	0.771203	1.03259	11.9225	0.0680949	Nrbf2
5.24218	1.81336	0.990752	11.9225	0.0188498	Nrbf2
20.5022	20.0015	0.992542	3.5999	0.18433	Ado
7.63136	6.87677	1.01319	3.5999	0.0583362	Ado
11.3947	1.09663	0.962514	3.5999	0.0734351	Ado
18.8666	13.8987	0.961169	8.25918	0.761326	Arid5b
4	4	1.00385	8.25918	0.0304794	Arid5b
5.64874	3.85262	0.92379	8.25918	0.581705	Arid5b
4	2	0.890942	8.25918	0.273615	Arid5b
22.7983	9.17106	0.979722	1.10336	0.555111	1700040L02Rik
4	2	0.908011	1.10336	0.046094	1700040L02Rik
4	2	2.61946	1.10336	0.0397904	1700040L02Rik
9.2384	8.92616	1.66341	1.10336	0.00408762	1700040L02Rik
31.8874	7.61507	0.275762	0.143058	12.6209	Tmem26
11.4554	7.70372	1.36738	0.143058	0.457952	Tmem26
4.92685	3.46891	1.38972	0.143058	0.0416028	Tmem26
4.93595	1.99763	1.00175	12.8948	0.075634	Rhobtb1
21.1973	15.7979	1.01493	12.8948	0.275036	Rhobtb1
10.7754	0.995959	1.06015	12.8948	0.0737057	Rhobtb1
27.9262	11.9037	1.06221	0.182282	0.152977	Cdk1
4	4	1.2313	0.182282	0.0251108	Cdk1
8.02321	0.398219	1.75029	0.182282	0.00409172	Cdk1
4	2	3.73366	0.182282	1.66992e-05	Cdk1
23.8692	6.75608	0.952687	2.26259	0.619616	Ank3
11.6725	6.86433	1.13955	2.26259	0.0729066	Ank3
5.34605	2.86343	1.52259	2.26259	0.0117356	Ank3
8.96722	5.69183	1.0219	4.9011	0.0430419	Ccdc6
6.1144	2.08713	2.29696	4.9011	0.0143505	Ccdc6
20.4111	3.65768	0.808525	1.08804	0.276953	Slc16a9
4	4	1.49657	1.08804	0.0524764	Slc16a9
5.85726	4.53209	5.2793	1.08804	0.00423676	Slc16a9
11.309	9.89438	1.30292	0.805226	0.0520828	Bicc1
6.68235	1.52604	1.88069	0.805226	0.0754386	Bicc1
4	2	2.11539	0.805226	5.26389e-05	Bicc1
22.0976	2.74238	0.993999	2.77435	0.31416	C730027H18Rik
11.0945	6.07829	1.02016	2.77435	0.14384	C730027H18Rik
7.59235	3.11576	1.12085	2.77435	0.086772	C730027H18Rik
11.2761	9.65891	0.982438	6.14896	0.0439242	Tfam
26.801	6.89843	0.911427	6.14896	0.168625	Tfam
6.5841	4.41283	0.914597	6.14896	0.0916745	Tfam
4	2	0.963831	4.24099	0.0562682	Ube2d1
16.1474	8.51105	0.921346	4.24099	0.177336	Ube2d1
6.08621	0.836067	1.08403	4.24099	0.0124723	Ube2d1
20.1637	7.27272	0.848381	85.9297	0.317866	Cisd1
4.63867	3.30996	0.954405	85.9297	0.09142	Cisd1
10.1031	7.33413	1.15031	85.9297	0.00344709	Cisd1
19.3342	15.0254	1.0048	8.87745	0.134466	Ipmk
11.8027	4.96726	0.947012	8.87745	0.116639	Ipmk
4	4	1.14237	8.87745	8.37772e-05	Ipmk
25.0258	6.39159	1.00017	21.8146	0.0601511	Zwint
6.30177	4.37276	0.98741	21.8146	0.0839945	Zwint
4.78569	2.82165	1.02683	21.8146	0.0350617	Zwint
22.2375	2.73092	1.02063	0.273359	0.441534	Rab36
7.5253	3.84368	1.0357	0.273359	0.198959	Rab36
12.0512	2.63623	1.06273	0.273359	0.141555	Rab36
7.43094	2.21188	1.00683	6.19281	0.0279454	Bcr
19.7574	18.6123	0.914626	6.19281	0.246162	Bcr
5.60915	2.17858	0.928518	6.19281	0.0305087	Bcr
9.42341	0.842882	1.06614	2.74354	0.0100132	Specc1l
6.27946	3.49675	1.14956	2.74354	0.00233901	Specc1l
4	2	1.78706	2.74354	0.0049527	Specc1l
13.832	4.61761	0.836584	0.46158	0.457247	Adora2a
4	4	1.16063	0.46158	0.0496137	Adora2a
11.2909	7.71303	1.37236	0.46158	0.00355518	Adora2a
6.5948	3.42918	0.961853	83.2216	0.061377	Upb1
7.22455	5.32518	0.199258	83.2216	1.14275	Upb1
18.922	17.5124	1.04118	83.2216	0.00266912	Upb1
23.7014	21.4676	0.981998	46.2809	0.123348	Gucd1
5.00887	0.020538	1.00611	46.2809	0.0302696	Gucd1
8.26225	1.80857	0.947899	46.2809	0.0712179	Gucd1
21.3975	1.92388	0.99386	42.753	0.12249	Snrpd3
12.4563	12.4153	1.0067	42.753	0.0331309	Snrpd3
7.83397	1.2052	0.981428	42.753	0.0736512	Snrpd3
5.03989	4.66014	1.02338	5.7524	0.00131985	Ggt1
5.99305	0.0465468	10.9545	5.7524	0.000198609	Ggt1
5.3666	2.66526	0.980075	0.368935	0.0948839	Ggt5
19.5017	17.8688	1.06533	0.368935	0.152455	Ggt5
8.59284	8.42506	1.13097	0.368935	0.000856948	Ggt5
13.1139	2.48443	0.928683	1.80135	0.0984952	Susd2
4	2	1.3237	1.80135	0.0101881	Susd2
6.06917	6.0572	3.71897	1.80135	0.00748578	Susd2
21.0337	10.7433	0.933282	2.86611	0.274485	Cabin1
8.37478	3.62736	1.33013	2.86611	0.037403	Cabin1
4	2	1.54773	2.86611	0.0137782	Cabin1
15.6977	3.54853	1.0354	399.192	0.0266737	Ddt
7.08597	2.3335	1.02141	399.192	0.0150768	Ddt
5.68807	5.60551	1.04376	399.192	0.00438278	Ddt
15.264	3.56569	0.962415	27.7538	0.472224	Gstt3
4	4	0.903824	27.7538	0.437759	Gstt3
4	2	0.694607	27.7538	0.71231	Gstt3
7.07753	0.434359	0.865151	27.7538	0.225568	Gstt3
15.0781	4.16444	1.00025	192.373	0.117019	Gstt1
4.3121	3.05897	1.01676	192.373	0.0820052	Gstt1
6.6217	3.48367	1.00973	192.373	0.0405669	Gstt1
23.5975	11.3874	0.978345	25.9096	0.423815	Gstt2
9.47634	6.21857	1.19735	25.9096	0.321782	Gstt2
5.93595	0.946553	1.11254	25.9096	0.0985912	Gstt2
28.4194	13.7776	0.98634	239.011	0.107013	Mif
7.64499	1.95265	1.03164	239.011	0.0646505	Mif
5.42656	0.209344	1.48734	239.011	0.0203513	Mif
21.6496	7.41307	0.969088	3.48564	0.67328	Derl3
6.31687	1.27923	1.22616	3.48564	0.191707	Derl3
4	4	0.493429	3.48564	0.200311	Derl3
22.0983	20.732	1.00043	9.44391	0.112395	Smarcb1
12.3751	1.49745	0.993166	9.44391	0.141234	Smarcb1
4.71133	4.19399	1.6686	9.44391	0.00658373	Smarcb1
21.4707	3.87108	0.957488	0.190615	0.389723	Mmp11
4.51327	2.04817	1.03792	0.190615	0.148051	Mmp11
7.79511	1.82933	1.11258	0.190615	0.0623633	Mmp11
13.8882	8.82863	0.979636	557.493	0.0874125	Chchd10
7.60926	4.12673	1.08457	557.493	0.0269451	Chchd10
24.1565	15.3815	0.984825	0.293852	1.06182	Vpreb3
7.4675	5.05094	1.03595	0.293852	0.451623	Vpreb3
11.3612	2.62702	0.943189	0.293852	0.223221	Vpreb3
20.9781	19.4703	1.04364	1.68465	0.105025	Zfp280b
9.54964	0.685474	1.08996	1.68465	0.158175	Zfp280b
4.79839	0.90519	0.90405	1.68465	0.123515	Zfp280b
5.82919	0.840566	1.135	0.254144	0.0415403	Prmt2
4.44933	1.72112	1.17521	0.254144	0.0109773	Prmt2
12.845	6.79368	1.50963	0.254144	0.00676828	Prmt2
12.2094	2.41591	0.637138	0.382825	0.465515	Dip2a
5.28917	1.79124	1.30189	0.382825	0.00572572	Dip2a
14.6008	3.82231	1.69307	0.382825	0.0041228	Dip2a
11.6188	7.39968	0.975539	1.21262	0.155625	Pcnt
24.7964	4.9362	0.916732	1.21262	0.317963	Pcnt
5.79921	1.23685	1.15218	1.21262	0.0200662	Pcnt
19.802	19.745	0.956829	3.67835	0.124002	Mcm3ap
5.84584	1.0623	0.908904	3.67835	0.0871959	Mcm3ap
12.0824	0.151242	1.11122	3.67835	0.0214046	Mcm3ap
5.51628	0.664366	1.00019	0.745041	0.0603113	Ybey
14.6353	5.03539	1.03604	0.745041	0.0105998	Ybey
4	2	0.771613	0.745041	0.00299327	Ybey
22.3583	20.6096	0.983188	11.2548	0.397199	Lss
7.12724	2.13949	1.00741	11.2548	0.146711	Lss
4	2	1.02933	11.2548	0.103684	Lss
22.1838	16.7054	1.01275	0.136865	0.469479	4930483K19Rik
7.46983	1.5415	0.984372	0.136865	0.392647	4930483K19Rik
5.44886	4.86028	0.836207	0.136865	0.512568	4930483K19Rik
21.9189	19.6516	0.974851	0.262638	0.467271	Spatc1l
5.08613	0.530703	0.9345	0.262638	0.332785	Spatc1l
8.89248	2.0731	1.0203	0.262638	0.075993	Spatc1l
12.0634	4.91931	0.862905	118.933	0.117038	Ftcd
4	4	0.623528	118.933	0.07366	Ftcd
21.4249	5.44728	1.10262	118.933	0.0389735	Ftcd
4	3.88422e-16	1.14253	118.933	5.76073e-05	Ftcd
4.77019	2.19959	0.878075	1.03502	0.643021	Col6a2
9.72116	6.65963	0.700144	1.03502	1.38023	Col6a2
4	2.54494e-17	9.30724	1.03502	0.218409	Col6a2
5.18299	1.58553	1.11563	1.78768	0.175291	Col6a1
26.557	10.6652	1.2781	1.78768	0.127084	Col6a1
8.18218	7.83095	1.23076	1.78768	0.0405619	Col6a1
15.0711	8.49105	1.03718	0.375939	0.12761	Pcbp3
4	4	0.922981	0.375939	0.0960363	Pcbp3
10.3269	4.16464	3.39925	0.375939	0.120297	Pcbp3
4	2	3.54276	0.375939	0.0563502	Pcbp3
38.2376	10.8631	0.929957	2.35967	0.764629	Slc19a1
4	4	0.134407	2.35967	0.673364	Slc19a1
4	2	1.78761	2.35967	0.167851	Slc19a1
8.15416	3.20749	1.5677	2.35967	0.178648	Slc19a1
12.0783	4.6242	1.00963	166.066	0.0644966	Col18a1
29.311	29.1947	1.03613	166.066	0.0669762	Col18a1
6.11742	2.49954	2.91518	166.066	0.0924049	Col18a1
17.9737	7.61114	1.01141	0.133095	0.227014	Gm10941
4	2	0.713352	0.133095	0.949819	Gm10941
6.44674	1.86216	1.04981	0.133095	0.158008	Gm10941
11.2516	0.282985	1.00546	7.21304	0.0888392	Pofut2
4.48213	3.96448	0.917067	7.21304	0.0674182	Pofut2
21.579	12.4704	1.00438	1.81918	0.444887	Adarb1
10.745	1.67303	0.966963	1.81918	0.220805	Adarb1
6.05351	0.375107	0.957991	1.81918	0.098529	Adarb1
11.6597	2.06638	1.00127	10.4878	0.114567	Fam207a
8.46592	0.686273	1.04864	10.4878	0.0268225	Fam207a
4	2	1.06057	10.4878	0.00376334	Fam207a
10.6061	6.49475	1.00791	1.30851	0.224801	Itgb2
5.38829	2.30153	0.90637	1.30851	0.537847	Itgb2
4	8.83594e-17	4.11755	1.30851	0.00150435	Itgb2
11.1448	5.9061	0.995756	68.5908	0.0370395	Pttg1ip
23.2194	2.21688	0.943909	68.5908	0.14998	Pttg1ip
6.20723	3.52569	0.891452	68.5908	0.0502924	Pttg1ip
22.6736	0.218091	0.99195	18.5085	0.25313	Sumo3
7.20527	3.02878	0.975368	18.5085	0.0307729	Sumo3
10.8996	7.93769	1.05006	18.5085	0.0106112	Sumo3
11.6069	1.77787	0.991145	15.1298	0.252078	Ube2g2
22.389	18.7927	0.979981	15.1298	0.249915	Ube2g2
4	2	1.07819	15.1298	0.00045776	Ube2g2
4	2	3.47137	15.1298	0.00599964	Ube2g2
21.0231	19.4247	1.00497	25.4102	0.202965	Lrrc3
9.86656	2.42256	1.14115	25.4102	0.034713	Lrrc3
4.21299	2.08951	1.15494	25.4102	0.0243346	Lrrc3
4	0	0.841144	0.388304	0.450229	Trpm2
5.85667	1.5746	0.870828	0.388304	0.662125	Trpm2
14.2586	12.8703	1.25874	0.388304	0.0638463	Trpm2
19.5272	8.80068	0.822492	2.50548	0.679974	1810043G02Rik
9.54984	1.22826	1.32836	2.50548	0.0387933	1810043G02Rik
4	2	1.66069	2.50548	0.0149866	1810043G02Rik
20.4803	19.7255	0.990373	7.59639	0.139239	Pfkl
4	4	0.986251	7.59639	0.00700959	Pfkl
5.74558	0.546673	1.10712	7.59639	0.0118232	Pfkl
7.6216	0.784694	1.01445	0.215333	0.124652	Icosl
4	2	1.01983	0.215333	0.0228255	Icosl
6.15011	2.07991	1.20041	0.215333	0.123682	Icosl
6.17782	4.4484	0.996638	43.3114	0.0727265	D10Jhu81e
4.83464	2.51199	0.937251	43.3114	0.0548193	D10Jhu81e
10.3383	3.62957	1.06936	43.3114	0.00432219	D10Jhu81e
11.9317	11.754	1.02328	2.78338	0.0958404	Pwp2
22.709	19.0852	0.923267	2.78338	0.302062	Pwp2
8.12197	5.90657	1.01136	2.78338	0.0352046	Pwp2
21.1978	18.4476	0.973817	4.4535	0.195425	Trappc10
8.53358	4.04933	1.1485	4.4535	0.0159739	Trappc10
5.49544	5.39927	1.46044	4.4535	0.00271808	Trappc10
13.9133	4.18493	0.947587	51.6682	0.0839062	Agpat3
4	4	0.981923	51.6682	0.0123814	Agpat3
6.23834	5.18491	1.07122	51.6682	0.0475369	Agpat3
7.65979	2.31202	1.00001	22.8088	0.045633	Rrp1
15.45	11.3112	0.9947	22.8088	0.0340294	Rrp1
4	2	1.36532	22.8088	0.005055	Rrp1
19.8193	6.57409	0.515162	37.8487	3.57425	Cstb
10.8848	10.6206	0.612571	37.8487	1.80301	Cstb
6.6157	2.05644	1.27529	37.8487	0.00363672	Cstb
22.8268	15.0013	1.00905	15.7873	0.408823	Pdxk
5.49988	1.00932	0.993384	15.7873	0.0636286	Pdxk
11.6585	1.98386	0.970656	15.7873	0.12307	Pdxk
4.22336	0.351658	1.02225	6.43698	0.14103	Ilvbl
20.4795	3.93158	1.05574	6.43698	0.0178305	Ilvbl
16.823	4.00001	0.929248	0.928281	0.19501	Syde1
4	2	0.857948	0.928281	0.104723	Syde1
6.06555	5.15109	2.05344	0.928281	0.0127399	Syde1
22.4693	2.98668	0.970249	1.36393	0.204172	2610008E11Rik
6.19669	4.69342	1.04855	1.36393	0.0184764	2610008E11Rik
9.31956	8.41371	1.32716	1.36393	0.00531297	2610008E11Rik
15.8378	11.8556	0.830715	7.97297	0.697116	Ppap2c
6.14183	4.17097	0.865694	7.97297	0.392464	Ppap2c
4	2	0.800957	7.97297	0.179117	Ppap2c
13.5631	10.7395	0.959746	2.79677	0.152649	Mier2
4	2	1.20225	2.79677	0.00714743	Mier2
6.65608	3.5662	1.08619	2.79677	0.0028606	Mier2
4	4	1.843	2.79677	0.00221376	Mier2
19.1754	3.62423	0.999099	16.731	0.122675	Tpgs1
7.98778	1.70146	0.99277	16.731	0.0390215	Tpgs1
4.97137	3.12591	1.23751	16.731	0.0304749	Tpgs1
7.53095	0.767757	0.998467	39.3473	0.0536207	Cdc34
21.9771	20.8468	1.0276	39.3473	0.0676564	Cdc34
12.1115	0.221769	1.02951	39.3473	0.0600377	Cdc34
16.8941	6.96333	1.03587	191.721	0.0333803	Bsg
4	2	1.1884	191.721	0.0039371	Bsg
8.65613	2.97602	1.36537	191.721	0.00328686	Bsg
5.59435	2.28609	1.02156	0.217969	0.0852385	Hcn2
20.5253	12.6844	0.93391	0.217969	0.0748788	Hcn2
7.9284	6.501	0.630215	0.217969	0.210279	Hcn2
5.37687	2.57317	1.11971	5.90317	0.109662	Polrmt
21.6082	0.985452	1.07625	5.90317	0.0162134	Polrmt
4	0	1.1281	5.90317	0.00722993	Polrmt
12.8677	12.417	1.00375	16.0877	0.113056	Rnf126
4.3459	0.80539	0.765716	16.0877	0.349871	Rnf126
22.3872	7.82003	0.67044	16.0877	0.281467	Rnf126
15.2987	14.3549	1.14611	0.148179	0.169778	Fstl3
4	1.25046e-17	20.6054	0.148179	2.9332	Fstl3
4	2	3.61163	0.148179	0.275038	Fstl3
4	2	1.21099	0.148179	0.0035118	Fstl3
21.9239	20.458	1.0293	1.70246	0.231573	Palm
6.4879	6.43489	3.20215	1.70246	0.252283	Palm
4	2	1.76211	1.70246	0.00646986	Palm
5.21108	3.74201	0.995115	0.123532	0.169374	Misp
10.9332	10.9025	2.25606	0.123532	0.0544783	Misp
4	2	2.10973	0.123532	0.000416032	Misp
9.9382	5.72534	0.951307	0.136888	0.218995	E130317F20Rik
5.74533	4.82462	0.971582	0.136888	0.0980494	E130317F20Rik
14.79	5.30274	1.02555	0.136888	0.00304092	E130317F20Rik
6.90325	1.68983	1.05311	0.560069	0.163775	Lppr3
5.09257	4.69635	0.923507	0.560069	0.193882	Lppr3
11.6166	10.9987	1.11448	0.560069	0.0312807	Lppr3
27.0776	4.08065	1.0138	30.7788	0.0417406	Ptbp1
11.2173	0.675678	0.852892	30.7788	0.107209	Ptbp1
4.47805	1.35945	1.04909	30.7788	0.0226414	Ptbp1
4.7539	0.308687	0.925297	0.583299	1.32655	Prtn3
14.2262	11.8367	0.889082	0.583299	1.47668	Prtn3
6.0365	2.79568	1.02779	0.583299	0.26205	Prtn3
5.87438	3.98166	0.995252	0.115166	0.446143	Elane
19.6453	6.90067	1.02338	0.115166	0.31171	Elane
7.98367	0.0569974	1.63414	0.115166	1.16149	Elane
6.76932	3.20966	1.10735	1.54824	0.0458508	Cfd
11.0707	6.29947	2.06411	1.54824	0.217556	Cfd
4	2	1.90627	1.54824	0.0128797	Cfd
21.0055	9.39284	0.976757	6.12626	0.190232	Med16
5.84337	5.11081	0.87982	6.12626	0.0572616	Med16
4	2	0.732724	6.12626	0.00798525	Med16
21.643	9.72986	0.931499	22.2726	0.106882	R3hdm4
5.98435	4.43095	0.888049	22.2726	0.103004	R3hdm4
7.65446	1.00331	0.899836	22.2726	0.0444741	R3hdm4
21.4625	4.7724	1.00513	0.15682	0.260201	Kiss1r
5.61937	4.97789	1.15168	0.15682	0.107035	Kiss1r
11.4609	5.30129	1.22992	0.15682	0.0727914	Kiss1r
11.5466	0.829556	0.95065	0.323299	0.306404	Arid3a
20.2003	0.899875	1.04928	0.323299	0.240882	Arid3a
5.54214	0.94614	1.41194	0.323299	0.0437427	Arid3a
11.1601	2.72679	1.00287	17.0089	0.0615181	Wdr18
22.8927	15.6385	1.0123	17.0089	0.0930097	Wdr18
6.45462	2.82484	1.01786	17.0089	0.0119409	Wdr18
4.54492	0.977846	0.99226	0.127458	0.322653	Grin3b
17.2255	12.3251	1.0764	0.127458	0.133467	Grin3b
22.5928	9.52042	0.871282	46.0401	0.258587	Tmem259
8.36912	2.10967	0.860753	46.0401	0.218785	Tmem259
5.26081	5.20047	0.855963	46.0401	0.179268	Tmem259
8.82823	6.12087	1.02371	2.48318	0.1464	Cnn2
5.63621	2.35014	0.710305	2.48318	0.740628	Cnn2
4	2	1.05935	2.48318	0.000190589	Cnn2
6.11851	0.503595	0.848511	1.09183	0.246879	Abca7
12.4866	5.00282	1.02223	1.09183	0.0343161	Abca7
13.24	2.87632	0.695054	1.09183	0.445476	Abca7
4.70341	2.90484	0.623438	1.85665	1.59548	Hmha1
8.44275	6.69658	0.688885	1.85665	0.987491	Hmha1
4	2	0.994148	16.9602	0.0251402	Polr2e
17.296	9.54134	0.836996	16.9602	0.429812	Polr2e
7.42145	2.82315	0.853443	16.9602	0.299095	Polr2e
6.30714	3.55554	0.864755	195.726	0.0987563	Gpx4
25.1109	8.97187	1.36485	195.726	0.0137639	Gpx4
6.09169	4.65783	1.68925	195.726	0.000314206	Gpx4
5.85606	2.81181	1.00037	4.58735	0.0269025	Sbno2
11.8228	1.82289	0.991465	4.58735	0.0571418	Sbno2
7.60464	5.15254	1.01559	4.58735	0.046319	Sbno2
17.9711	8.36815	0.845647	26.4922	0.341873	Stk11
7.20452	3.23969	0.973275	26.4922	0.0504484	Stk11
11.5365	0.795485	0.56161	26.4922	0.343866	Stk11
5.43088	3.92508	1.10146	0.461003	0.0780914	Dos
7.08794	0.643612	1.12401	0.461003	0.0767384	Dos
25.8483	17.7893	1.09938	0.461003	2.11197e-05	Dos
6.16155	4.51899	1.014	328.823	0.0573706	Atp5d
7.18954	3.54545	1.34134	328.823	0.00625589	Atp5d
32.0877	20.8004	1.22572	328.823	0.00401135	Atp5d
23.9875	8.15139	0.979065	13.5822	0.275761	Midn
11.5404	10.3742	1.02141	13.5822	0.0528263	Midn
4	2	0.725205	13.5822	0.143295	Midn
6.7015	3.27465	1.00019	9.11176	0.174785	Cirbp
10.5318	6.92482	1.0009	9.11176	0.118026	Cirbp
20.6039	6.44236	1.00597	9.11176	0.430836	Cirbp
4	2	1.00444	3.5813	0.00387107	1600002K03Rik
16.9034	12.7582	1.10272	3.5813	0.0185953	1600002K03Rik
7.13204	0.561025	1.08289	3.5813	0.00849618	1600002K03Rik
4	3.99755e-17	0.206541	3.5813	0.00606891	1600002K03Rik
21.8932	7.82503	0.785025	1.67371	0.690558	Mum1
8.37244	0.751573	0.872092	1.67371	0.385701	Mum1
6.02649	0.178795	1.47813	1.67371	0.0494111	Mum1
8.0844	2.67482	1.09323	95.1445	0.0121483	Ndufs7
4.43381	1.36139	1.48662	95.1445	0.0112487	Ndufs7
19.6465	6.91414	1.41348	95.1445	0.001199	Ndufs7
20.678	13.2282	0.994087	186.33	0.0964213	Gamt
4	4	1.01969	186.33	0.0261004	Gamt
6.93606	3.07268	1.02518	186.33	0.0265726	Gamt
23.0445	9.89865	0.960912	18.1591	0.298678	Dazap1
7.19318	2.31709	0.942444	18.1591	0.097426	Dazap1
11.3459	9.66262	1.05732	18.1591	0.0309948	Dazap1
15.3508	10.4519	0.947443	420.787	0.128717	Rps15
7.98293	3.41338	1.17232	420.787	0.0570542	Rps15
6.62266	1.86941	1.44083	420.787	0.00895392	Rps15
20.8562	6.99761	0.897322	6.49512	0.24069	2310011J03Rik
7.27157	2.57733	0.936068	6.49512	0.0890228	2310011J03Rik
4.96734	4.64748	0.82724	6.49512	0.145184	2310011J03Rik
11.5997	9.3695	1.00319	4.17492	0.240099	Pcsk4
22.8213	10.5252	0.968798	4.17492	0.999337	Pcsk4
4.75288	2.19943	1.0325	4.17492	0.0229578	Pcsk4
17.3464	16.013	0.922842	514.805	0.279089	Reep6
10.6974	6.97914	0.608473	514.805	0.669564	Reep6
6.5626	2.80137	0.868925	514.805	0.0936607	Reep6
10.7142	7.19365	0.803001	0.338297	2.06011	Adamtsl5
5.38158	1.61401	0.775852	0.338297	1.04374	Adamtsl5
26.9909	11.6783	1.1571	0.338297	0.0276916	Adamtsl5
24.0747	15.2182	0.981816	0.834905	0.400108	Plk5
11.2153	1.18788	0.960262	0.834905	0.185943	Plk5
4.70543	2.16012	1.01378	0.834905	0.0527609	Plk5
11.7665	9.48083	0.984377	0.78205	0.163995	Mex3d
4.45277	0.660787	0.973499	0.78205	0.103873	Mex3d
22.3261	14.3763	1.03746	0.78205	0.132662	Mex3d
8.0432	1.30975	0.994254	24.9137	0.0674076	Mbd3
4	2	0.973587	24.9137	0.0200119	Mbd3
20.748	19.5971	1.05157	24.9137	0.0450222	Mbd3
17.5542	8.20619	1.06094	338.642	0.0551266	Uqcr11
7.42479	2.85618	1.10697	338.642	0.0224464	Uqcr11
10.1777	2.73445	1.06929	338.642	0.00468765	Uqcr11
20.2627	8.24547	0.933728	4.47836	0.202507	Tcf3
9.35452	1.29592	0.921748	4.47836	0.148855	Tcf3
5.16915	4.50517	0.907475	4.47836	0.0877774	Tcf3
20.8541	0.99444	0.955803	5.74078	0.0797594	Rexo1
4.95706	3.60354	1.01738	5.74078	0.0302893	Rexo1
10.817	1.98091	0.789896	5.74078	0.180478	Rexo1
22.9684	9.98859	1.00522	1.75421	0.357087	Klf16
8.61848	1.29064	0.987059	1.75421	0.165357	Klf16
4	2	1.06932	1.75421	0.0803869	Klf16
4	4	5.35262	1.75421	0.0341475	Klf16
21.0015	14.8183	0.95899	41.0201	0.106726	Abhd17a
6.20654	4.67891	0.889347	41.0201	0.170578	Abhd17a
4.90303	2.53249	0.9071	41.0201	0.116495	Abhd17a
7.96568	2.69989	1.01246	0.876682	0.208394	Adat3
21.1056	15.8663	0.954761	0.876682	0.282619	Adat3
4.54588	4.2846	1.12386	0.876682	0.00520599	Adat3
11.8338	1.80358	0.995288	13.4419	0.0650207	Scamp4
16.3728	7.40915	1.14765	13.4419	0.0156452	Scamp4
5.0402	3.31766	2.41566	13.4419	6.60965e-05	Scamp4
21.9543	9.69821	0.923004	27.5093	0.207265	Csnk1g2
7.50918	2.45406	0.826039	27.5093	0.190265	Csnk1g2
5.2564	0.0471336	0.826831	27.5093	0.180443	Csnk1g2
21.5525	7.95763	0.966383	7.29132	0.115288	Btbd2
11.2195	8.44423	1.09878	7.29132	0.0241728	Btbd2
5.83036	3.12854	1.2814	7.29132	0.0167526	Btbd2
21.4528	12.6214	1.03718	31.4984	0.333244	Mknk2
4.81602	2.44893	0.927814	31.4984	0.249615	Mknk2
10.8383	5.24339	1.21928	31.4984	0.0884507	Mknk2
7.33122	1.10602	1.00002	1.34974	0.190634	Mob3a
18.7514	1.86123	0.900591	1.34974	0.398561	Mob3a
6.10662	2.73254	1.46185	1.34974	0.103627	Mob3a
4.77829	2.62867	0.955578	5.4592	0.20467	Izumo4
11.3497	6.87077	1.03602	5.4592	0.0887611	Izumo4
22.2145	6.78878	1.07721	5.4592	0.0427135	Izumo4
11.9979	1.65228	0.973027	10.4981	0.0929373	Ap3d1
21.564	20.8803	0.932091	10.4981	0.174452	Ap3d1
5.2268	0.730046	1.25952	10.4981	0.0218037	Ap3d1
21.2181	19.8551	0.988381	4.52858	0.169998	Dot1l
8.35731	4.30709	0.96638	4.52858	0.0738757	Dot1l
4.56541	1.28939	1.10048	4.52858	0.00261653	Dot1l
19.9196	5.49489	1.00936	9.60044	0.0822748	Plekhj1
7.76274	1.82389	1.02487	9.60044	0.0411001	Plekhj1
11.8165	0.455019	1.04616	9.60044	0.0291117	Plekhj1
11.0414	0.341172	1.04062	13.8179	0.0655491	Sf3a2
16.7577	11.2373	1.14953	13.8179	0.0230093	Sf3a2
4	2	1.12941	13.8179	0.00587955	Sf3a2
20.2226	7.52615	0.321307	0.277579	557.229	Jsrp1
6.90715	0.82653	0.317195	0.277579	396.223	Jsrp1
4	7.02745e-16	0.354229	0.277579	97.5534	Jsrp1
21.8607	6.54445	0.960482	156.393	0.169743	Oaz1
7.74175	2.40566	0.900443	156.393	0.0906123	Oaz1
4	4	0.339773	156.393	0.172557	Oaz1
4	4	1.24344	156.393	3.70543e-06	Oaz1
6.34419	4.46957	0.987942	88.0713	0.0636315	Oaz1-ps
11.8102	5.36264	0.946519	88.0713	0.19586	Oaz1-ps
23.9235	4.68222	1.02422	88.0713	0.05223	Oaz1-ps
19.7263	6.40537	1.00772	15.3945	0.130857	Lsm7
11.9201	11.3394	1.02634	15.3945	0.0683244	Lsm7
7.79507	0.67935	1.08302	15.3945	0.0493448	Lsm7
6.71652	1.2787	0.996687	5.22164	0.0358324	Sppl2b
20.1619	1.8565	1.017	5.22164	0.135427	Sppl2b
4.8212	3.61422	1.00839	5.22164	0.0261315	Sppl2b
6.98873	2.97324	0.978151	29.0423	0.0601902	Timm13
18.0236	13.5285	1.08065	29.0423	0.0194199	Timm13
9.58517	5.9991	1.07937	29.0423	0.00396201	Timm13
11.0566	2.27719	1.00331	2.52903	0.138103	Lmnb2
21.855	15.2101	1.03314	2.52903	0.1828	Lmnb2
7.24971	0.459531	1.06153	2.52903	0.108205	Lmnb2
5.17518	2.03252	1.01608	0.353192	0.204607	Gadd45b
6.84783	5.86257	0.974141	0.353192	0.26959	Gadd45b
21.8164	15.6483	1.24577	0.353192	0.0502319	Gadd45b
20.0515	4.46093	0.868606	2.38805	0.225378	Slc39a3
6.71443	4.9098	1.30658	2.38805	0.0334086	Slc39a3
4	2	1.21432	2.38805	2.67983e-05	Slc39a3
10.6568	9.17263	0.977034	30.0919	0.0555881	Sgta
4.84286	2.43674	1.01616	30.0919	0.0268837	Sgta
6.4657	3.61951	0.927138	30.0919	0.0786604	Sgta
5.71706	1.14353	0.719894	3.79953	0.307534	Thop1
11.8414	3.01622	1.03463	3.79953	0.0277487	Thop1
23.0371	16.3877	1.07229	3.79953	0.0354161	Thop1
23.602	10.2571	1.0099	92.9211	0.136199	Creb3l3
8.45225	5.21028	0.956823	92.9211	0.0617072	Creb3l3
5.79959	0.335068	1.28522	92.9211	0.00622753	Creb3l3
25.4699	15.1527	0.932047	47.3642	0.0909846	Map2k2
7.76597	2.4627	1.07865	47.3642	0.0241991	Map2k2
4	6.86885e-18	0.500708	47.3642	0.0600072	Map2k2
19.8047	16.4513	1.01367	11.0005	0.128871	Zbtb7a
7.2201	5.58617	0.987282	11.0005	0.0653532	Zbtb7a
11.7398	11.3901	1.06347	11.0005	0.0326448	Zbtb7a
25.5837	5.65142	0.851813	6.37071	0.116974	Pias4
6.34981	6.17986	0.880799	6.37071	0.0572006	Pias4
4.8411	1.41993	1.24349	6.37071	0.0262789	Pias4
19.973	14.5131	1.0059	431.03	0.047578	Eef2
5.98276	4.40765	1.00632	431.03	0.0285448	Eef2
11.9812	3.80913	1.06761	431.03	0.0221252	Eef2
7.66685	1.35873	1.01017	12.2223	0.0532872	Dapk3
21.3652	1.86003	1.01859	12.2223	0.0794979	Dapk3
12.4667	12.4582	1.0381	12.2223	0.078018	Dapk3
16.0904	9.71723	0.961984	35.1377	0.132554	Mrpl54
9.60862	5.66218	1.17817	35.1377	0.0401599	Mrpl54
4.88713	2.79843	1.37129	35.1377	0.073917	Mrpl54
21.6723	18.4258	1.0081	19.4771	0.114205	Apba3
11.5377	2.10738	0.975163	19.4771	0.142502	Apba3
7.47478	0.558899	0.964036	19.4771	0.0704706	Apba3
23.0385	22.6486	0.983008	11.5542	0.660107	Tjp3
7.31863	1.68798	0.99049	11.5542	0.199276	Tjp3
11.5587	1.61274	1.0271	11.5542	0.112171	Tjp3
19.6663	2.48826	0.873565	7.63477	0.20061	Pip5k1c
5.66861	5.34542	1.22104	7.63477	0.0400593	Pip5k1c
13.2824	2.98689	1.10386	7.63477	0.00642544	Pip5k1c
19.6479	19.0536	0.997227	4.7996	0.0666288	Cactin
5.05676	2.85328	0.98179	4.7996	0.0303165	Cactin
11.6092	0.417409	1.03492	4.7996	0.0571967	Cactin
5.31402	2.89532	0.961316	0.466848	0.213383	Tbxa2r
18.8617	2.16519	1.20733	0.466848	0.0476204	Tbxa2r
6.23006	4.28637	1.41356	0.466848	0.0385883	Tbxa2r
26.5819	11.6477	0.963242	14.271	0.0868636	Hmg20b
7.7919	1.12479	1.03562	14.271	0.0302665	Hmg20b
6.59797	3.14877	1.04311	14.271	0.0242357	Hmg20b
19.6921	0.728591	0.873649	2.51165	0.363014	Mfsd12
4	4	1.00952	2.51165	0.0089991	Mfsd12
5.82779	1.7007	1.02722	2.51165	0.0381466	Mfsd12
4	4	0.632267	2.51165	0.0250771	Mfsd12
11.4292	9.20354	0.986901	0.677727	0.115355	4930404N11Rik
4.48259	3.59615	0.972411	0.677727	0.156593	4930404N11Rik
5.72661	1.07497	0.659919	0.677727	0.982398	4930404N11Rik
4	2	1.0077	4.76684	0.0173244	Fzr1
4.87657	3.2157	1.1173	4.76684	0.0217926	Fzr1
8.16138	2.7774	1.06816	4.76684	0.0100872	Fzr1
27.2318	10.5574	0.961221	14.0822	0.168237	Dohh
11.4915	0.389333	0.973875	14.0822	0.101197	Dohh
7.54158	3.19432	1.04463	14.0822	0.0273574	Dohh
10.6989	6.83749	1.04228	1.67825	0.05189	Smim24
9.4834	0.952934	3.10777	1.67825	0.0356987	Smim24
4	2	3.86005	1.67825	0.01624	Smim24
11.126	3.91545	1.00459	36.9497	0.0845378	Nfic
21.0792	16.4677	0.977547	36.9497	0.360989	Nfic
7.47092	7.19118	1.02607	36.9497	0.0296884	Nfic
24.0123	16.462	1.01357	21.6324	0.0501797	Ncln
10.8981	2.10234	0.89077	21.6324	0.117108	Ncln
6.17624	4.92497	1.02159	21.6324	0.0176955	Ncln
24.8901	3.79922	0.907565	0.116643	0.904485	S1pr4
4.32506	4.15927	0.953321	0.116643	0.143491	S1pr4
12.5367	3.93558	1.05905	0.116643	0.115476	S1pr4
11.6078	1.86039	0.960702	16.1107	0.103769	Gna11
20.8855	15.7762	1.02846	16.1107	0.0621828	Gna11
5.46769	0.120783	1.05329	16.1107	0.0188188	Gna11
16.0023	6.45985	0.922053	383.167	0.107827	Aes
4.42328	4.20204	0.954187	383.167	0.0438833	Aes
29.7254	17.944	0.915606	383.167	0.0445208	Aes
24.076	23.3617	1.00413	4.31436	0.103193	Tle2
10.2156	9.17624	1.02607	4.31436	0.038692	Tle2
4.49751	0.0847939	1.15563	4.31436	0.0092128	Tle2
7.80459	2.41867	0.915988	0.567056	0.322317	Tle6
20.3704	2.73236	1.04856	0.567056	0.0613845	Tle6
5.70136	5.10687	1.11655	0.567056	0.041988	Tle6
14.357	5.70339	0.85681	0.195832	0.806507	BC025920
7.52973	1.52561	0.771364	0.195832	1.27886	BC025920
4.62052	0.166471	0.890119	0.195832	0.343443	BC025920
17.4936	6.31051	0.929835	1.65458	0.147124	Sirt6
10.2617	3.13959	0.872103	1.65458	0.217197	Sirt6
6.46093	0.92626	0.646873	1.65458	0.433188	Sirt6
12.7577	9.72185	1.01315	0.871809	0.106488	Ankrd24
5.3051	4.33331	1.6418	0.871809	0.00670802	Ankrd24
15.5724	2.29612	1.6517	0.871809	0.000903473	Ankrd24
17.0289	4.09058	1.01947	0.23861	0.0625886	Gm10778
4	2	1.17109	0.23861	0.00929873	Gm10778
6.38448	5.82189	1.1679	0.23861	0.00806545	Gm10778
23.125	2.11373	0.976522	0.586966	0.151927	Zfp433
10.3136	6.30696	0.847323	0.586966	0.265347	Zfp433
5.31833	1.01801	0.936816	0.586966	0.0885522	Zfp433
17.7496	4.81178	0.926382	0.109469	0.438477	Zfp781
12.3581	1.44545	0.89725	0.109469	0.274559	Zfp781
6.33828	1.00895	0.87922	0.109469	0.321672	Zfp781
5.87239	5.51179	1.03046	0.144586	0.12424	Gm10778
7.30699	1.74	0.503799	0.144586	0.788416	Gm10778
19.9769	1.0848	1.03006	0.144586	0.0350328	Gm10778
20.8889	4.13978	0.916685	0.614903	0.264281	Zfp433
4.51587	2.75121	0.674884	0.614903	1.01133	Zfp433
6.76164	5.91591	0.600767	0.614903	0.829368	Zfp433
5.55994	2.81674	0.995532	0.108544	0.197208	Zfp781
12.1948	1.36519	0.934672	0.108544	0.0982902	Zfp781
15.5953	5.28905	0.662459	0.108544	0.167288	Zfp781
19.2149	0.312174	1.0361	0.716716	0.109101	Zfp873
7.67883	7.59872	1.0343	0.716716	0.0477119	Zfp873
24.7032	23.6638	0.965614	0.558163	0.177124	AU041133
4.37749	1.70215	0.890684	0.558163	0.0264683	AU041133
4	2	4.52139	0.558163	0.00145182	AU041133
18.3771	6.17407	0.970482	0.986258	0.220131	Zfp938
6.30431	1.22245	0.822935	0.986258	0.38089	Zfp938
4	2	1.13089	0.986258	0.00461031	Zfp938
21.2878	6.21089	0.845061	8.52089	0.346657	1190007I07Rik
12.9115	12.0914	0.832627	8.52089	0.19541	1190007I07Rik
8.00023	1.08352	1.05758	8.52089	0.00784551	1190007I07Rik
11.1403	2.21479	1.01585	2.3009	0.171448	Tdg
4	4	1.01781	2.3009	0.0471594	Tdg
5.60616	1.08051	0.925273	2.3009	0.205021	Tdg
4	2	1.30318	2.03507	0.0305139	Gm9855
6.92261	3.18335	1.14904	2.03507	0.0262101	Gm9855
30.379	16.0911	1.83971	2.03507	0.0177245	Gm9855
4.46959	1.69575	1.00035	2.43972	0.0616108	Hcfc2
14.9678	0.808698	0.871277	2.43972	0.214737	Hcfc2
5.79772	1.10579	1.0149	2.43972	0.0138504	Hcfc2
23.7937	2.10567	0.944876	6.57523	0.221522	Nfyb
5.85866	2.77871	1.0283	6.57523	0.0434786	Nfyb
10.6028	6.73608	1.10079	6.57523	0.0172607	Nfyb
19.0818	18.345	0.964391	32.6408	0.112696	Txnrd1
10.4376	1.75431	0.948125	32.6408	0.124364	Txnrd1
4.5019	2.01744	1.0773	32.6408	0.0183182	Txnrd1
10.2047	8.64298	1.04799	0.148975	0.112898	Eid3
4.56152	0.39901	1.22608	0.148975	0.0175679	Eid3
4	2	8.6759	0.148975	0.170136	Eid3
7.03637	0.257615	0.734796	0.204617	0.254846	Chst11
5.88639	5.61063	4.99071	0.204617	0.000211637	Chst11
23.4881	20.1787	0.78235	7.03624	1.16284	Slc41a2
6.25272	0.0512052	1.03626	7.03624	0.0999856	Slc41a2
11.3316	11.213	1.04807	7.03624	0.0385618	Slc41a2
12.1221	0.25994	0.959224	3.40811	0.0617983	D10Wsu102e
6.75647	3.55837	1.15381	3.40811	0.0217421	D10Wsu102e
4	2	1.48226	3.40811	0.00300363	D10Wsu102e
22.516	20.7576	0.918551	3.14314	0.428863	A230046K03Rik
7.93682	6.80611	1.05752	3.14314	0.0713295	A230046K03Rik
6.56084	3.08515	0.598943	3.14314	0.206538	A230046K03Rik
22.906	5.67058	0.962463	4.16749	0.208401	Appl2
12.2361	6.5178	1.02816	4.16749	0.0602813	Appl2
5.53277	4.0196	1.19081	4.16749	0.00289072	Appl2
20.0889	2.23345	1.00365	0.612699	0.189185	Nuak1
4	2	0.961592	0.612699	0.0698354	Nuak1
5.95938	1.28833	1.05844	0.612699	0.0763278	Nuak1
6.59601	1.12025	0.807915	0.607403	0.706585	Ckap4
11.1783	4.49244	1.20025	0.607403	0.261759	Ckap4
4	2	1.21109	0.607403	0.00434298	Ckap4
22.2134	5.82825	0.980984	4.82111	0.537793	Tcp11l2
7.02059	2.58231	1.01052	4.82111	0.178115	Tcp11l2
11.3304	6.58184	0.979129	4.82111	0.294192	Tcp11l2
17.3705	0.415427	0.933634	2.51856	0.211106	Polr3b
5.2026	1.72736	1.09528	2.51856	0.0900756	Polr3b
10.5244	1.73871	1.11506	2.51856	0.0119124	Polr3b
22.3417	4.72317	0.972334	1.19206	0.860503	Rfx4
11.7374	6.05096	0.931248	1.19206	0.65111	Rfx4
6.39888	4.29461	1.29957	1.19206	0.141775	Rfx4
22.1853	21.4349	0.997187	1.6817	0.161455	Ric8b
5.91881	1.50693	0.762809	1.6817	0.218132	Ric8b
6.39025	4.81598	0.731738	1.6817	0.128536	Ric8b
11.3689	1.84942	0.997077	1.39376	0.159448	Tmem263
18.606	1.43687	0.867141	1.39376	0.358964	Tmem263
5.20945	3.96218	0.986225	1.39376	0.0334932	Tmem263
22.6667	7.07563	0.964308	1.02329	0.695611	Mterf2
11.5568	5.20021	1.02328	1.02329	0.189457	Mterf2
6.90768	1.2221	1.03944	1.02329	0.115843	Mterf2
22.6254	18.847	0.999577	5.97997	0.947082	Cry1
4	2	1.62124	5.97997	0.127547	Cry1
13.2742	5.45731	4.32078	5.97997	0.0527769	Cry1
6.19109	0.679144	0.892327	0.128637	0.642283	Btbd11
5.70743	5.49952	1.51151	0.128637	0.0132533	Btbd11
11.3377	1.90341	1.00664	4.11377	0.114253	Pwp1
21.705	20.11	0.948582	4.11377	0.135516	Pwp1
6.99896	1.92069	0.982838	4.11377	0.0345147	Pwp1
22.6096	11.377	1.0848	1.6442	0.0758798	Prdm4
10.3822	1.06644	1.07083	1.6442	0.0571166	Prdm4
4	2.33136e-18	0.772039	1.6442	0.0639825	Prdm4
4	2	1.51994	1.6442	6.56199e-05	Prdm4
6.03049	5.04985	0.977161	19.4942	0.0517871	Rtcb
4	2	0.196646	19.4942	0.694749	Rtcb
22.3507	9.36805	0.953401	19.4942	0.063563	Rtcb
4	2	0.766154	7.30461	0.0638917	Fbxo7
16.5259	10.4064	1.09344	7.30461	0.0176875	Fbxo7
5.77148	4.40765	1.69193	7.30461	0.0418198	Fbxo7
26.731	4.07964	1.00476	0.323697	0.162023	Syn3
4	2	1.03698	0.323697	0.0170273	Syn3
9.13608	6.35784	1.8758	0.323697	0.0289468	Syn3
4	2	3.15675	0.323697	0.00668752	Syn3
21.469	13.7348	1.05216	8.20042	0.0547945	Timp3
4	2	1.10945	8.20042	0.026754	Timp3
5.89425	5.86331	4.1941	8.20042	0.0225945	Timp3
21.2551	7.18118	0.863305	0.552314	0.817845	1810014B01Rik
6.12101	0.51565	1.01495	0.552314	0.0757538	1810014B01Rik
9.05946	8.4169	1.03263	0.552314	0.0547326	1810014B01Rik
4.9326	3.88823	0.99655	203.154	0.0854684	Hsp90b1
28.8604	27.5748	0.928963	203.154	0.321181	Hsp90b1
12.159	1.15785	1.03064	203.154	0.101653	Hsp90b1
11.3904	1.45721	0.971514	0.760325	0.187754	Ttc41
19.3785	1.18584	1.03249	0.760325	0.131797	Ttc41
4.98471	1.67236	1.09354	0.760325	0.0164089	Ttc41
17.7899	16.17	1.00082	2.77687	0.100459	Nt5dc3
6.17278	0.457767	0.965019	2.77687	0.128315	Nt5dc3
11.3769	1.65416	1.04022	2.77687	0.0253604	Nt5dc3
21.5957	1.13525	0.792016	2.60256	0.549383	Stab2
5.07529	2.66567	0.901027	2.60256	0.229896	Stab2
9.48732	6.9223	0.884189	2.60256	0.226654	Stab2
22.0814	14.9219	1.0385	472.633	0.12219	Pah
4.61181	2.77595	0.935052	472.633	0.161039	Pah
8.01119	6.25802	0.947283	472.633	0.0928593	Pah
20.385	15.2865	0.802606	120.966	0.237834	Igf1
7.16037	4.2636	0.876519	120.966	0.110107	Igf1
4.68569	4.02223	1.30522	120.966	0.00510877	Igf1
18.1131	6.78279	1.00727	1.80599	0.0807966	Nup37
4.86396	1.07595	1.09457	1.80599	0.0984331	Nup37
5.61775	3.08307	1.15166	1.80599	0.134985	Nup37
21.6572	7.15084	0.949565	10.9233	0.211674	Ccdc53
4.47737	3.38879	0.921341	10.9233	0.118147	Ccdc53
10.3137	6.26596	1.05802	10.9233	0.0227663	Ccdc53
6.03584	2.83081	0.863759	0.169121	0.69052	Dram1
10.5979	7.52849	1.52142	0.169121	0.138054	Dram1
4	2	1.77176	0.169121	0.027851	Dram1
15.6654	0.600748	1.06923	2.08566	0.0485678	Gnptab
4	2	0.613788	2.08566	0.0993384	Gnptab
5.7986	2.42292	1.51222	2.08566	0.00320418	Gnptab
16.4048	2.68847	1.02208	63.9296	0.090467	Chpt1
4.28523	1.40342	2.22551	63.9296	0.377981	Chpt1
9.28561	3.64899	3.75711	63.9296	0.191733	Chpt1
10.1321	7.57898	0.258664	0.923935	1012.65	Mybpc1
5.04469	2.74594	0.262727	0.923935	599.302	Mybpc1
5.5882	2.22044	0.885201	0.488171	0.636828	Spic
9.55777	6.82495	0.958898	0.488171	0.139427	Spic
20.8738	15.6389	1.02172	36.7492	0.0696219	Arl1
11.2805	2.64726	1.03445	36.7492	0.0391707	Arl1
4	4	0.253608	36.7492	0.0609991	Arl1
4	4	0.912829	36.7492	0.000729088	Arl1
23.2992	15.034	1.00424	1.77633	0.18114	Utp20
11.7611	1.79921	0.912412	1.77633	0.297722	Utp20
4.62397	2.36461	1.07493	1.77633	0.0261016	Utp20
45.2161	10.0949	1.0617	0.735664	0.00562946	Slc5a8
5.10818	3.11761	1.19133	0.735664	0.00106347	Slc5a8
5.97991	2.32703	8.73325	0.735664	5.39823e-06	Slc5a8
20.6012	15.5364	0.978889	0.450343	0.480603	Gas2l3
7.05097	2.12722	0.940759	0.450343	0.416397	Gas2l3
4.17967	2.47848	0.887087	0.450343	0.0729309	Gas2l3
22.5134	14.4229	1.00286	51.4223	0.135676	Nr1h4
12.1567	7.05162	0.969389	51.4223	0.0475135	Nr1h4
4.29324	2.2206	1.06643	51.4223	0.0121548	Nr1h4
23.5986	19.5334	0.957251	3.70053	0.784375	Slc17a8
13.788	6.67012	0.927071	3.70053	0.450882	Slc17a8
6.34183	4.65859	1.26293	3.70053	0.0863622	Slc17a8
19.51	16.9578	0.987641	6.55621	0.142265	Scyl2
5.20342	3.47408	0.702664	6.55621	0.127293	Scyl2
4.52409	0.999281	0.721113	6.55621	0.0438277	Scyl2
4	1.01422e-17	0.987041	0.24995	0.0477378	1500026H17Rik
6.16331	5.52719	1.13857	0.24995	0.0638056	1500026H17Rik
8.8861	0.61606	1.19144	0.24995	0.0365975	1500026H17Rik
10.9299	1.39412	0.992305	2.85266	0.0697829	Actr6
21.9859	14.6024	1.05349	2.85266	0.0817722	Actr6
4.7709	0.687471	1.27317	2.85266	0.00769308	Actr6
19.5684	15.3664	0.97746	7.93554	0.0704607	Uhrf1bp1l
9.48506	5.42742	1.00519	7.93554	0.0086165	Uhrf1bp1l
6.49024	0.654804	0.960084	7.93554	0.00939275	Uhrf1bp1l
30.0396	29.0424	0.956369	0.230275	0.412899	Apaf1
5.59408	2.11291	0.926845	0.230275	0.369923	Apaf1
4.76755	0.769127	1.15307	0.230275	0.0250028	Apaf1
17.4205	4.20182	0.980636	0.861013	0.294094	Ikbip
6.16669	1.35333	0.896576	0.861013	0.524981	Ikbip
4.64447	0.434787	1.05733	0.861013	0.101542	Ikbip
7.80603	7.08102	1.14261	109.483	0.00945212	Slc25a3
5.68114	5.65132	1.45841	109.483	0.029372	Slc25a3
29.0652	24.555	1.18742	109.483	0.00653225	Slc25a3
20.2882	19.5252	0.973114	7.68264	0.172507	Tmpo
5.99198	0.928011	0.984738	7.68264	0.0397942	Tmpo
9.70994	1.33251	0.93092	7.68264	0.170814	Tmpo
25.755	5.23611	1.00795	2.6262	0.0792193	Nedd1
11.9723	7.33792	1.03527	2.6262	0.0524811	Nedd1
4.77236	0.547696	1.45268	2.6262	0.0227339	Nedd1
4.52175	0.0973379	1.00902	3.32529	0.0249121	Cdk17
7.10304	2.35244	1.24357	3.32529	0.0160797	Cdk17
17.5267	3.2262	0.864675	1.2383	0.587898	Elk3
5.8198	1.22002	0.868505	1.2383	0.352924	Elk3
11.8752	4.93647	1.12698	1.2383	0.0206075	Elk3
7.52119	1.14087	0.998677	12.4166	0.0314127	Lta4h
17.5774	2.65896	0.949501	12.4166	0.0680806	Lta4h
5.17934	3.99645	1.75003	12.4166	0.0664837	Lta4h
24.172	2.51537	0.987654	87.6343	0.337932	Hal
12.3416	5.52531	0.94057	87.6343	0.2152	Hal
4	4	0.204194	87.6343	0.180193	Hal
4	1.37446e-16	1.13865	87.6343	0.00774084	Hal
23.2858	4.81403	0.980816	59.346	0.444917	Amdhd1
8.16712	8.03209	0.986788	59.346	0.0368024	Amdhd1
4	4	2.08155	59.346	0.0479289	Amdhd1
12.2433	12.0727	0.974164	9.15571	0.115829	Snrpf
8.05421	0.578132	1.052	9.15571	0.035768	Snrpf
21.3922	20.0477	1.07223	9.15571	0.0256718	Snrpf
16.1254	3.65515	0.926045	1.45514	0.691605	Ntn4
4	2	1.30716	1.45514	0.0460262	Ntn4
6.0779	0.531091	1.79326	1.45514	0.0431673	Ntn4
11.2863	3.76877	0.967754	7.14356	0.0402307	Metap2
6.80455	2.60647	1.01287	7.14356	0.0044881	Metap2
4	2	0.931541	7.14356	0.0100236	Metap2
22.51	7.57451	0.951351	1.09559	0.15045	Vezt
9.02147	1.00667	0.983529	1.09559	0.0257445	Vezt
5.49044	4.38496	0.91025	1.09559	0.0986323	Vezt
12.9719	3.9269	0.964465	5.17953	0.173619	Fgd6
8.49427	2.52655	1.13659	5.17953	0.0644175	Fgd6
28.445	6.57659	1.175	5.17953	0.0225398	Fgd6
5.41217	4.20445	1.03717	3.44852	0.206922	Nr2c1
11.4436	4.3123	1.05295	3.44852	0.0472234	Nr2c1
15.6932	7.46212	1.24615	3.44852	0.0631489	Nr2c1
8.98985	6.43942	1.08617	89.9573	0.00522332	Ndufa12
5.33421	1.87384	1.85947	89.9573	0.0266256	Ndufa12
20.3774	5.29406	1.34067	89.9573	0.00709844	Ndufa12
17.5525	1.99172	0.963266	2.37312	0.226308	Tmcc3
5.6909	5.34796	1.15215	2.37312	0.0706076	Tmcc3
7.21746	5.42651	1.07018	2.37312	0.0139185	Tmcc3
22.5538	6.34291	0.95761	0.497026	0.577845	Cep83os
4	2	0.944566	0.497026	0.0757413	Cep83os
11.8771	5.79028	1.10893	0.497026	0.102179	Cep83os
4	2	1.24257	0.497026	0.00125848	Cep83os
22.2998	3.66223	0.96659	1.60551	0.176094	Cep83
5.10764	2.14744	0.985022	1.60551	0.0539634	Cep83
10.5271	8.7957	0.969884	1.60551	0.0859558	Cep83
17.829	1.98503	0.914249	1.0073	0.462889	Plxnc1
4.42662	3.10349	1.09122	1.0073	0.137686	Plxnc1
9.98275	5.26589	1.15942	1.0073	0.012207	Plxnc1
11.3682	8.94617	0.999836	6.58792	0.0466746	Cradd
21.6375	5.69223	0.967669	6.58792	0.254205	Cradd
4.56397	3.21413	0.867068	6.58792	0.213674	Cradd
16.7143	10.4163	0.969177	5.57482	0.529339	Socs2
5.42645	4.1853	0.96791	5.57482	0.445567	Socs2
7.08211	2.91499	1.02854	5.57482	0.365503	Socs2
30.9116	10.1441	1.10834	48.8617	0.0384239	Mrpl42
8.1901	0.303341	1.06238	48.8617	0.0183818	Mrpl42
5.85275	1.69158	1.56516	48.8617	0.0456411	Mrpl42
7.52021	1.07924	0.961543	6.81045	0.0723664	Ube2n
11.2321	2.77762	0.918019	6.81045	0.116565	Ube2n
20.422	18.7997	1.07225	6.81045	0.0316039	Ube2n
28.6365	6.36378	0.798961	35.5997	0.385604	Nudt4
12.8393	4.81272	1.07587	35.5997	0.033786	Nudt4
5.54568	2.36456	1.53579	35.5997	0.00165823	Nudt4
17.5116	1.24958	0.962863	4.11874	0.147411	Eea1
6.20727	0.633035	1.03852	4.11874	0.01914	Eea1
11.6432	4.63911	1.05753	4.11874	0.0072126	Eea1
23.0704	21.4839	0.969348	7.2114	0.480398	Btg1
11.8472	5.79967	0.985026	7.2114	0.198468	Btg1
6.68189	2.73488	1.08873	7.2114	0.428275	Btg1
4.52917	2.29453	0.985415	40.5474	0.17035	Dcn
19.2049	2.86827	0.897725	40.5474	0.509778	Dcn
11.7576	3.65527	1.10457	40.5474	0.0136542	Dcn
4.55453	2.21627	1.08365	1.75892	0.266574	Lum
25.2062	4.88217	1.16083	1.75892	0.0197906	Lum
5.15561	3.00504	1.73793	1.75892	0.00828881	Lum
15.0248	1.46789	0.85708	3.77283	0.271864	Atp2b1
5.77419	1.03655	1.13196	3.77283	0.0779314	Atp2b1
17.0463	6.3685	1.15286	3.77283	0.00482677	Atp2b1
4	2	0.645858	2.20131	0.545426	Poc1b
4	1.19254e-17	0.514601	2.20131	0.715139	Poc1b
16.3948	8.34573	0.918284	2.20131	0.116329	Poc1b
6.31787	3.81416	1.04631	2.20131	0.00918558	Poc1b
5.15511	2.3064	0.978656	3.17558	0.0984736	Galnt4
22.3556	18.5	0.866859	3.17558	0.249836	Galnt4
8.83065	7.42505	0.973794	3.17558	0.04001	Galnt4
30.8487	0.339457	1.00328	12.3949	0.412148	Dusp6
10.7946	1.86812	1.0147	12.3949	0.123409	Dusp6
6.64444	0.523809	0.892955	12.3949	0.344316	Dusp6
6.30846	0.125342	1.00146	0.396578	0.175024	Kitl
23.7467	15.7028	0.981535	0.396578	0.350956	Kitl
5.19188	0.372185	1.13199	0.396578	0.00198714	Kitl
20.4809	19.7549	1.01609	1.23113	0.154239	Tmtc3
5.57865	1.87371	0.986806	1.23113	0.0346103	Tmtc3
6.03542	0.668277	1.04109	1.23113	0.00183387	Tmtc3
12.595	0.3154	0.968233	0.262311	0.137024	Cep290
20.1101	0.786654	1.05705	0.262311	0.112845	Cep290
5.6542	0.884394	1.11349	0.262311	0.0755677	Cep290
22.1159	19.4325	0.967697	1.14373	0.306411	4930430F08Rik
4.92176	2.46227	0.936787	1.14373	0.110646	4930430F08Rik
7.80611	1.66281	1.07489	1.14373	0.00565307	4930430F08Rik
23.2128	11.7961	1.02975	1.06808	0.415694	Tmtc2
6.23804	6.15649	0.948357	1.06808	0.198652	Tmtc2
11.7284	7.50163	1.11463	1.06808	0.0730873	Tmtc2
23.814	2.94077	0.933593	0.799256	0.232258	Mettl25
6.68404	3.67532	0.953631	0.799256	0.111842	Mettl25
4	4	1.03175	0.799256	0.0265766	Mettl25
4	2	0.37347	0.799256	0.0141181	Mettl25
7.3559	0.745512	0.969317	7.32779	0.0736438	Ccdc59
11.8929	0.866515	0.939301	7.32779	0.131782	Ccdc59
19.5622	7.81885	0.888959	7.32779	0.17043	Ccdc59
14.8844	4.2222	0.996443	3.66805	0.42469	Acss3
4.96249	2.08455	0.976324	3.66805	0.151117	Acss3
6.79461	3.31471	1.05863	3.66805	0.0312115	Acss3
20.1991	14.8744	1.01056	5.0403	0.128213	Lin7a
10.0936	5.65356	1.20244	5.0403	0.00751002	Lin7a
4	4	1.61956	5.0403	0.00148542	Lin7a
16.5261	1.72789	0.841532	3.56205	0.223595	Ppp1r12a
7.30502	6.61358	1.05492	3.56205	0.0244439	Ppp1r12a
4.78854	3.82439	1.05856	3.56205	0.010175	Ppp1r12a
23.7997	15.0503	1.0043	3.2415	0.167191	Pawr
10.4515	2.58951	0.411664	3.2415	1.74927	Pawr
5.25682	5.05368	1.67426	3.2415	0.0174377	Pawr
22.788	8.82001	0.996129	1.91785	0.709073	Syt1
11.7309	8.55837	1.05244	1.91785	0.161086	Syt1
4	2.16116e-17	1.18495	1.91785	0.146782	Syt1
4	2	1.49511	1.91785	0.0939894	Syt1
24.4942	19.7016	0.956741	0.106091	0.9831	E2f7
4.34182	2.6957	0.967253	0.106091	0.68744	E2f7
5.92052	2.2737	1.02228	0.106091	0.0704901	E2f7
4	2	1.10674	22.3474	0.0207949	Csrp2
16.1006	7.65917	1.45347	22.3474	0.0824203	Csrp2
7.97293	2.94783	1.99355	22.3474	0.0573447	Csrp2
5.59868	0.115387	1.13515	1.54398	0.0612254	Zdhhc17
20.2344	3.37882	1.18507	1.54398	0.0392967	Zdhhc17
8.00392	1.38972	1.14485	1.54398	0.00199865	Zdhhc17
20.2461	18.3902	1.03843	4.85862	0.140798	Osbpl8
8.09767	1.55258	0.849794	4.85862	0.444742	Osbpl8
4.89796	2.56921	1.36664	4.85862	0.00352674	Osbpl8
15.0858	4.08077	0.96881	1.4431	0.0748781	Bbs10
4.36796	3.03764	0.834528	1.4431	0.212688	Bbs10
9.67987	7.54778	0.755241	1.4431	0.0410107	Bbs10
7.13724	3.20992	0.926808	16.537	0.323624	Nap1l1
5.02935	0.694509	0.672233	16.537	0.722116	Nap1l1
28.8702	15.4588	0.933537	16.537	0.120871	Nap1l1
4	2	0.979434	52.1296	0.136702	Phlda1
18.8358	12.039	0.916579	52.1296	1.01257	Phlda1
9.91903	2.98746	0.960837	52.1296	0.336574	Phlda1
4	2	10.7004	52.1296	0.199989	Phlda1
11.349	1.56583	0.974289	2.67109	0.101796	Krr1
5.50614	1.47654	1.01327	2.67109	0.0352037	Krr1
20.5995	17.0085	1.04865	2.67109	0.0401419	Krr1
8.05834	2.01066	1.01556	0.285208	0.29874	Glipr1
5.96257	0.906958	0.914778	0.285208	0.572175	Glipr1
25.9722	4.11329	0.675381	0.285208	0.924491	Glipr1
10.2227	2.00155	1.10367	19.7988	0.06067	Atxn7l3b
5.67367	0.588577	0.805793	19.7988	0.0884678	Atxn7l3b
18.357	17.0712	1.03427	19.7988	0.00697753	Atxn7l3b
13.8613	6.79225	0.715933	0.311866	3.01062	Trhde
5.15023	1.96411	0.911718	0.311866	0.48306	Trhde
23.1013	6.84908	1.04924	6.33117	0.101025	Tbc1d15
7.82514	3.49093	1.08592	6.33117	0.0445716	Tbc1d15
4	7.82555e-17	1.14667	6.33117	0.0173774	Tbc1d15
22.4458	22.2068	0.919191	10.214	0.207344	Rab21
4.35891	1.15803	1.08344	10.214	0.0204514	Rab21
6.66021	1.7121	1.16016	10.214	0.0185301	Rab21
27.3662	25.5212	0.994691	36.6296	0.106877	Tmem19
4.36865	4.30898	0.975292	36.6296	0.033177	Tmem19
8.53148	3.85844	1.01005	36.6296	0.004469	Tmem19
4.65551	0.892097	0.844144	1.64053	0.376522	Thap2
21.783	15.0734	1.03771	1.64053	0.0728009	Thap2
8.93745	2.39955	1.05532	1.64053	0.0665733	Thap2
19.1474	1.29092	0.927405	4.51263	0.200259	Zfc3h1
4	2	0.968255	4.51263	0.0313564	Zfc3h1
10.8222	6.91997	1.09565	4.51263	0.0123118	Zfc3h1
4	4	2.00337	4.51263	0.00333093	Zfc3h1
12.7186	11.9274	0.986156	1.39693	0.194128	Lgr5
44.1848	31.9418	0.925824	1.39693	0.230563	Lgr5
7.2497	1.04093	1.08146	1.39693	0.0598027	Lgr5
4.79642	0.811524	0.880608	0.358612	0.335954	Tspan8
33.9174	13.9624	2.0798	0.358612	0.093526	Tspan8
5.26102	4.2062	4.75103	0.358612	0.0016225	Tspan8
17.1325	2.37087	0.953304	3.29897	0.405815	Ptprb
4.386	2.06064	1.02292	3.29897	0.0940718	Ptprb
6.3381	1.1694	1.0396	3.29897	0.0844931	Ptprb
4.37582	2.44722	0.879864	7.23549	0.0833527	Cnot2
6.43986	5.63223	0.888439	7.23549	0.000659931	Cnot2
28.6877	10.8496	1.06288	6.24341	0.0664171	Rab3ip
4	2	2.47246	6.24341	0.00263692	Rab3ip
8.86226	2.24526	2.04576	6.24341	8.82844e-06	Rab3ip
5.70495	2.64359	1.04562	0.250385	0.0870533	4933412E12Rik
26.2518	23.1949	1.32246	0.250385	0.238691	4933412E12Rik
4	2	1.57238	0.250385	0.0196229	4933412E12Rik
4	2	0.293245	0.343883	0.0404266	D630029K05Rik
19.2273	18.559	0.580407	0.343883	0.0376543	D630029K05Rik
6.05106	3.62863	12.1773	0.343883	6.86641e-11	D630029K05Rik
12.3414	1.79793	0.936012	36.6412	0.102947	Cct2
4	2	0.673457	36.6412	0.0374717	Cct2
20.8953	15.299	1.12114	36.6412	0.024592	Cct2
4	2	1.40944	36.6412	4.71494e-05	Cct2
17.2695	16.5807	0.951689	2.79184	0.139117	Frs2
4.43364	1.34293	1.02983	2.79184	0.0323228	Frs2
5.98983	0.623756	1.05199	2.79184	0.0272443	Frs2
20.3864	7.41642	0.969015	9.78746	0.162775	Yeats4
5.30899	4.84806	1.00908	9.78746	0.0291457	Yeats4
8.37493	1.54219	0.955872	9.78746	0.0795536	Yeats4
20.643	3.56761	0.884985	20.7789	0.748803	Lyz2
5.61082	2.03432	0.893606	20.7789	0.676194	Lyz2
8.48272	7.66079	0.960537	20.7789	0.248259	Lyz2
21.1876	16.4012	1.00992	3.28721	0.157764	Cpsf6
12.4281	1.86453	0.924359	3.28721	0.143046	Cpsf6
4.60449	0.953865	1.0572	3.28721	0.0206048	Cpsf6
18.8654	16.4136	1.05606	0.556724	0.10104	Cpm
4	4	1.03149	0.556724	0.0104823	Cpm
5.72936	4.79157	2.18152	0.556724	0.0454516	Cpm
10.8385	2.17388	1.05923	7.04011	0.0287796	Mdm2
4.73486	3.85049	1.07758	7.04011	0.0154305	Mdm2
19.4357	1.26008	1.11004	7.04011	0.010932	Mdm2
23.1624	17.0188	0.972239	5.36431	0.226553	Slc35e3
6.98504	6.60939	1.10556	5.36431	0.0654778	Slc35e3
4.63195	0.313819	1.11515	5.36431	0.0624562	Slc35e3
5.65357	1.73225	0.993717	0.877172	0.0761616	Nup107
20.0841	1.98713	1.02191	0.877172	0.08441	Nup107
8.782	1.50229	0.804594	0.877172	0.410504	Nup107
13.0544	1.98555	1.02709	13.7598	0.043489	Rap1b
5.72938	5.33739	1.23468	13.7598	0.029276	Rap1b
39.0599	32.5214	1.14364	13.7598	0.0166031	Rap1b
4	2	1.03724	0.219851	0.121327	Mdm1
17.7029	6.89473	1.08635	0.219851	0.0548374	Mdm1
10.0339	8.25593	1.12611	0.219851	0.0430217	Mdm1
29.7963	0.808167	0.999399	8.85894	0.175911	Dyrk2
11.9937	5.66216	1.02657	8.85894	0.138127	Dyrk2
8.08079	3.70701	1.1179	8.85894	0.0440318	Dyrk2
17.7977	17.6073	0.868908	5.78158	0.251234	Cand1
8.45753	6.13474	1.37413	5.78158	0.0651461	Cand1
6.80739	1.66197	1.48174	5.78158	0.0563062	Cand1
9.12411	7.4161	0.97966	2.50179	0.0301712	Helb
5.99071	2.78236	1.34468	2.50179	0.0261759	Helb
5.97733	1.90372	0.72145	0.30146	3.5558	Irak3
37.5218	3.84249	0.760727	0.30146	1.39156	Irak3
4.17684	0.566386	0.92171	0.30146	0.374895	Irak3
7.67473	2.02702	1.00014	39.8157	0.0118599	Tmbim4
4	5.58835e-17	1.01513	39.8157	0.00378905	Tmbim4
5.87337	4.72466	3.47835	39.8157	0.0139184	Tmbim4
32.4065	13.0573	0.875189	17.3183	0.367353	Llph
10.9269	1.17315	0.91918	17.3183	0.223373	Llph
4	2.29461e-17	0.876039	17.3183	0.0635067	Llph
21.5505	4.3488	1.02043	2.19383	0.0899486	Msrb3
5.97181	1.10761	0.918308	2.19383	0.264794	Msrb3
11.5165	2.82221	1.08827	2.19383	0.0548941	Msrb3
4	2	1.00697	1.74997	0.0999177	Lemd3
16.1406	0.639155	0.893826	1.74997	0.261632	Lemd3
8.10984	1.35853	1.16281	1.74997	0.00936998	Lemd3
10.7632	9.55845	1.00189	1.28903	0.208756	Tbc1d30
22.8946	8.72463	0.963238	1.28903	0.707751	Tbc1d30
4.96356	2.90716	1.14846	1.28903	0.0134479	Tbc1d30
23.3997	9.23523	1.04778	40.2031	0.08553	Gns
5.91528	0.559615	1.02845	40.2031	0.0473099	Gns
4	4	3.81841	40.2031	0.154376	Gns
23.2445	8.66608	1.01372	21.2777	0.248194	Rassf3
6.44148	4.43324	1.00965	21.2777	0.034514	Rassf3
11.3821	11.0503	1.08072	21.2777	0.0262018	Rassf3
5.69704	2.35256	1.00461	4.96225	0.0823652	Tbk1
26.7712	1.08077	0.930162	4.96225	0.193483	Tbk1
4	1.44118e-16	1.0719	4.96225	6.64223e-05	Tbk1
4.07263	2.91108	0.932427	9.59196	0.236434	Xpot
19.8115	14.053	1.04079	9.59196	0.083442	Xpot
6.63086	4.50318	1.0485	9.59196	0.0158769	Xpot
10.2185	6.34984	1.02589	1.51918	0.0290427	BC048403
6.7042	1.92493	1.1425	1.51918	0.120051	BC048403
4	4	1.13582	1.51918	0.0179052	BC048403
4	2	2.99311	1.51918	0.0667081	BC048403
4	2	1.48359	0.109966	0.215311	Srgap1
6.26683	4.31403	1.07302	0.109966	0.0461785	Srgap1
7.4212	6.98971	1.60767	0.109966	0.00324521	Srgap1
6.1484	5.83512	0.995915	0.11604	0.210108	Gm9079
24.0996	23.9738	0.929535	0.11604	0.715941	Gm9079
4	7.42001e-17	0.0814354	0.11604	0.775038	Gm9079
6.69276	2.97105	1.01721	7.1482	0.0207891	Tmem5
18.5119	9.04238	0.943076	7.1482	0.0672542	Tmem5
4	4	0.820135	7.1482	0.0578791	Tmem5
4	2	1.70626	7.1482	0.0290527	Tmem5
23.348	22.7711	0.986775	10.8451	0.803336	Avpr1a
12.6316	11.2149	0.965362	10.8451	0.288125	Avpr1a
6.05782	3.10232	1.34663	10.8451	0.000536669	Avpr1a
22.3333	3.88339	1.09802	0.523197	0.182892	Ppm1h
4	2	1.19514	0.523197	0.0339566	Ppm1h
5.90267	1.05705	3.10192	0.523197	0.0104468	Ppm1h
6.08439	1.52571	1.0477	5.54507	0.0306488	Mon2
17.3386	16.1211	1.12317	5.54507	0.0203714	Mon2
4	1.47466e-16	1.04929	5.54507	0.000134046	Mon2
19.8919	18.1855	1.00448	2.5621	0.0762112	Usp15
6.08724	5.80112	0.986026	2.5621	0.0353856	Usp15
4.35753	1.3695	1.03199	2.5621	0.0161267	Usp15
6.53355	4.88369	1.01532	11.7568	0.0933409	Slc16a7
18.2469	17.3948	1.02022	11.7568	0.103357	Slc16a7
4.64228	2.84819	0.924387	11.7568	0.295301	Slc16a7
22.3415	10.6501	1.03101	1.99775	0.0933623	Lrig3
12.0961	5.27577	1.03412	1.99775	0.0243991	Lrig3
7.44239	7.27087	1.05502	1.99775	0.0393047	Lrig3
11.8772	11.0634	0.991036	2.83419	0.151357	Xrcc6bp1
23.2282	13.1676	0.94905	2.83419	0.315073	Xrcc6bp1
4	7.17784e-18	0.931044	2.83419	0.0926352	Xrcc6bp1
4	2	0.319081	2.83419	0.106683	Xrcc6bp1
24.6517	8.6572	0.964163	10.303	0.21545	Ctdsp2
11.882	6.51556	1.01904	10.303	0.10616	Ctdsp2
7.20202	2.16628	1.03981	10.303	0.0429956	Ctdsp2
4.95372	2.62592	0.984807	8.07678	0.236418	Tsfm
15.2976	11.3726	0.962656	8.07678	0.128396	Tsfm
4	7.17104e-17	1.49621	8.07678	0.031521	Tsfm
12.6949	1.00182	0.997405	6.16151	0.216857	Mettl1
4.46898	1.98084	1.01175	6.16151	0.0569423	Mettl1
23.0178	19.4989	0.943829	6.16151	0.239584	Mettl1
8.70813	1.52751	1.11214	0.267897	0.136432	43533
10.0301	8.79585	1.96939	0.267897	0.0804801	43533
4	2	2.27442	0.267897	0.00170892	43533
13.1461	12.6313	1.04597	17.5665	0.0540743	Cdk4
4	2	1.11774	17.5665	0.0136925	Cdk4
8.10057	3.4796	1.10267	17.5665	0.0108014	Cdk4
10.5901	1.02814	0.966509	137.436	0.060542	Tspan31
35.5124	15.7846	0.93556	137.436	0.0852099	Tspan31
5.58479	2.78768	1.10288	137.436	0.0412603	Tspan31
23.1683	15.5191	1.00202	2.93728	0.366703	LOC100504703
4.58769	2.75457	0.953311	2.93728	0.229379	LOC100504703
6.72861	5.82799	1.02217	2.93728	0.0523319	LOC100504703
12.083	0.661646	1.01802	0.660767	0.297957	Agap2
23.5418	14.9847	1.03023	0.660767	0.290368	Agap2
6.48882	1.62126	1.05218	0.660767	0.168806	Agap2
18.4428	13.8792	0.967107	53.2781	0.0491137	Os9
6.33072	1.27528	1.10329	53.2781	0.00559244	Os9
8.97811	8.48235	1.289	53.2781	0.0140308	Os9
23.2556	2.27374	0.966758	44.3371	0.0856708	B4galnt1
4	2	0.880628	44.3371	0.0521645	B4galnt1
5.86113	5.82617	1.334	44.3371	0.00813637	B4galnt1
8.3388	7.18272	0.870358	0.641876	0.597031	Slc26a10
4.75938	2.90012	0.83251	0.641876	0.764899	Slc26a10
23.4916	9.12383	1.04521	0.641876	0.104577	Slc26a10
4.91296	2.80656	1.04805	0.358669	0.0460228	Arhgef25
27.4276	11.1699	1.35575	0.358669	0.0894088	Arhgef25
5.78413	2.86382	1.20195	0.358669	0.0159096	Arhgef25
4	2	1.35328	1.66157	0.0464859	Dtx3
5.80125	0.642373	1.49801	1.66157	0.049116	Dtx3
16.4448	4.51174	1.57057	1.66157	0.0262689	Dtx3
4	2	1.01121	0.130539	0.1337	F420014N23Rik
5.57903	4.82812	0.966564	0.130539	0.250737	F420014N23Rik
4	2	1.2272	0.130539	0.167002	F420014N23Rik
13.176	11.5328	1.16166	0.130539	0.0236058	F420014N23Rik
26.3311	6.35805	0.923425	5.85491	0.172392	Pip4k2c
15.2603	1.22057	1.79188	5.85491	0.00697698	Pip4k2c
5.6795	0.702933	1.95431	5.85491	0.00645686	Pip4k2c
18.2946	7.22958	0.952832	0.390529	0.242112	Kif5a
9.28418	0.235139	1.02274	0.390529	0.0986955	Kif5a
5.08082	4.8953	1.02608	0.390529	0.111381	Kif5a
21.6301	7.98496	0.979969	41.9529	0.127496	Dctn2
7.45704	2.54806	0.879591	41.9529	0.128068	Dctn2
5.1979	0.019126	0.892606	41.9529	0.0994767	Dctn2
4	2	0.858432	10.3722	0.105299	Mbd6
13.4842	11.5144	0.934983	10.3722	0.0929258	Mbd6
5.25045	4.13705	0.905	10.3722	0.103469	Mbd6
4	2	4.27902	10.3722	0.00887795	Mbd6
12.0165	0.392509	1.03054	5.0857	0.252398	Ddit3
8.50727	0.191036	1.04508	5.0857	0.0831035	Ddit3
4.65106	1.93975	0.937065	5.0857	0.00985691	Ddit3
25.901	0.306349	1.0251	15.6129	0.0816117	Mars
8.07567	1.70715	0.89754	15.6129	0.0833377	Mars
11.9592	2.38974	1.03118	15.6129	0.0237876	Mars
20.9658	4.70696	0.838228	0.573004	0.895845	Arhgap9
6.03672	1.35095	0.935539	0.573004	0.296142	Arhgap9
7.94365	0.939056	1.01502	0.573004	0.0355012	Arhgap9
23.9394	4.59188	1.03308	24.2254	0.144921	Inhbe
13.0604	9.43874	1.07799	24.2254	0.211749	Inhbe
5.49798	0.228537	1.01908	24.2254	0.0479437	Inhbe
22.1471	20.6858	1.01791	39.0999	0.201207	Inhbc
8.63037	8.08342	1.42718	39.0999	0.0428743	Inhbc
4	2	1.02871	39.0999	0.00114608	Inhbc
4	0	3.01405	39.0999	0.00384436	Inhbc
24.1275	7.10113	0.995653	20.169	0.122854	R3hdm2
11.8872	7.486	1.03523	20.169	0.0285024	R3hdm2
5.16301	1.50193	1.03967	20.169	0.0171405	R3hdm2
20.1825	6.64294	0.699705	0.155367	12.6401	Stac3
8.18449	7.29914	0.706594	0.155367	8.92209	Stac3
5.35031	1.989	0.790114	0.155367	2.38219	Stac3
23.6173	6.33899	0.87422	2.02255	0.741977	Ndufa4l2
11.7353	6.04273	1.03424	2.02255	0.0735001	Ndufa4l2
4.50036	0.574622	1.05609	2.02255	0.0509685	Ndufa4l2
19.645	13.7597	0.988645	104.818	0.0519084	Shmt2
4.35077	2.88706	0.932752	104.818	0.0658443	Shmt2
6.644	2.59504	1.0304	104.818	0.0157071	Shmt2
18.7475	15.5306	1.1307	63.1638	0.0131082	Lrp1
4	0	1.69237	63.1638	0.00669299	Lrp1
9.19826	5.08169	1.1193	63.1638	0.000674369	Lrp1
26.1214	7.37025	0.989736	12.7993	0.100423	Stat6
12.2392	1.20638	0.945501	12.7993	0.0790385	Stat6
5.60311	3.01592	1.01106	12.7993	0.0110512	Stat6
21.5232	6.88153	0.917881	6.12053	0.467575	Nab2
6.84173	1.09487	0.955036	6.12053	0.0277196	Nab2
4.39697	3.90354	1.03184	6.12053	0.00741158	Nab2
7.30672	3.84328	1.00458	1.63199	0.104021	1700012D01Rik
27.8507	9.55666	0.94329	1.63199	0.305032	1700012D01Rik
4.63846	1.9687	1.03976	1.63199	0.0522642	1700012D01Rik
24.6373	5.22505	0.952682	0.550032	0.464378	Tmem194
8.66008	7.09373	1.11336	0.550032	0.0161494	Tmem194
12.1597	6.0094	1.12173	0.550032	0.0132463	Tmem194
12.3093	4.8029	1.01693	1.78385	0.0544208	Zbtb39
28.3885	3.06238	1.03526	1.78385	0.0656801	Zbtb39
8.25281	3.09577	1.07879	1.78385	0.0365128	Zbtb39
19.4651	0.241234	1.02557	8.23579	0.369635	Gpr182
5.48085	1.67645	0.890154	8.23579	0.272797	Gpr182
6.72761	1.58411	1.18114	8.23579	0.0209482	Gpr182
27.1603	7.09581	0.959697	0.48631	0.474212	Rdh1
11.2394	6.91425	0.935618	0.48631	0.353629	Rdh1
4.61609	3.12271	1.05007	0.48631	0.0354358	Rdh1
22.13	10.8989	1.02055	17.1484	0.30732	Rdh9
4.72728	2.73176	0.976335	17.1484	0.211933	Rdh9
6.97125	5.03465	0.872574	17.1484	0.540257	Rdh9
6.27659	4.72316	0.998514	20.6307	0.200838	Rdh16
13.5037	4.98979	0.954349	20.6307	0.34757	Rdh16
4.56963	2.84583	0.92947	20.6307	0.235611	Rdh16
4.90015	2.32895	1.00713	1.33864	0.0651431	Rdh18-ps
15.2608	1.60804	1.04623	1.33864	0.117051	Rdh18-ps
6.79312	5.00788	1.1425	1.33864	0.0844666	Rdh18-ps
5.34317	4.95448	1.01712	0.617879	0.147656	Rdh19
12.3879	4.93794	0.945419	0.617879	0.341806	Rdh19
24.5011	7.94259	1.03139	0.617879	0.105908	Rdh19
7.33905	3.67965	1.0145	41.9716	0.02371	BC089597
12.2387	2.71919	1.02193	41.9716	0.035326	BC089597
4	4	1.09915	41.9716	0.00437091	BC089597
25.6041	3.31547	0.983408	477.621	0.110332	Rdh7
4	1.40818e-17	0.652589	477.621	0.177085	Rdh7
6.14071	0.868561	1.26511	477.621	0.0077779	Rdh7
25.1927	23.8745	0.975974	13.2539	0.274767	Sdr9c7
6.58757	1.31989	1.01881	13.2539	0.0541485	Sdr9c7
5.06515	3.75815	1.03343	13.2539	0.0833201	Sdr9c7
27.4896	7.65665	0.921126	39.8682	0.994291	Hsd17b6
4.38909	3.2101	0.54322	39.8682	2.74028	Hsd17b6
8.88391	7.70333	0.978268	39.8682	0.120882	Hsd17b6
16.5553	5.71185	0.969108	0.903117	0.25446	Prim1
4.68262	3.56078	1.03226	0.903117	0.0476733	Prim1
12.3798	4.65299	1.31959	0.903117	0.0407937	Prim1
22.045	9.31269	0.949042	93.3884	0.10359	Naca
7.68875	2.71396	1.02782	93.3884	0.0389919	Naca
6.28806	4.21301	1.03283	93.3884	0.0379872	Naca
11.947	1.89094	1.01238	34.861	0.0640052	Ptges3
7.5949	1.25171	0.942152	34.861	0.0731152	Ptges3
20.8304	17.4497	1.04806	34.861	0.0471743	Ptges3
16.0768	1.9099	1.05586	486.268	0.0254655	Atp5b
5.4716	5.04819	1.49331	486.268	0.0179968	Atp5b
17.5098	9.33549	1.59699	486.268	0.00519153	Atp5b
12.9862	2.53242	0.949375	5.29496	0.0656346	Baz2a
24.1973	10.9173	1.17641	5.29496	0.000737186	Baz2a
4	2	1.37008	5.29496	0.000304178	Baz2a
4	4	19.4645	5.29496	0.0125752	Baz2a
12.2119	4.09275	0.993869	2.47679	0.0765116	Rbms2
7.23069	2.01458	1.26642	2.47679	0.0682114	Rbms2
4	2	1.69923	2.47679	0.0135463	Rbms2
8.66483	7.02267	1.00249	129.639	0.0230257	Gls2
4.79239	2.08456	1.03958	129.639	0.0694066	Gls2
19.3085	9.16115	1.10611	129.639	0.0169063	Gls2
20.66	0.774084	1.01971	13.7391	0.056044	Spryd4
11.8215	2.07505	1.03001	13.7391	0.0708751	Spryd4
4	2.62804e-17	1.0237	13.7391	0.00761479	Spryd4
4	2	98.4134	13.7391	0.311406	Spryd4
9.36105	9.09633	0.954661	0.52073	0.195906	Timeless
4.46699	0.806609	1.14198	0.52073	0.0838463	Timeless
26.2526	12.8091	1.29479	0.52073	0.0298792	Timeless
23.8645	2.08789	0.985689	165.274	0.106505	Apon
4	2	0.95818	165.274	0.0143982	Apon
5.82314	3.95067	1.30546	165.274	0.00426301	Apon
10.5379	0.986963	1.00059	227.481	0.0549403	Apof
20.5715	3.19676	0.93283	227.481	0.044699	Apof
5.88813	4.43562	1.28632	227.481	0.00325483	Apof
20.8805	19.9886	0.957549	12.8501	0.224995	Stat2
11.1007	0.197666	0.935412	12.8501	0.165598	Stat2
4.66076	0.333812	0.938701	12.8501	0.0562754	Stat2
20.9022	4.70016	0.986478	5.56642	0.114581	Pan2
8.11663	1.60193	0.956465	5.56642	0.183198	Pan2
4.99882	4.57699	0.9464	5.56642	0.0496351	Pan2
20.1956	8.07127	0.934586	42.9813	0.246519	Cnpy2
7.74286	2.00141	0.855696	42.9813	0.20291	Cnpy2
5.52461	4.78034	0.745073	42.9813	0.1606	Cnpy2
21.7094	1.35373	0.985364	45.1768	0.159655	Cs
6.95621	1.66745	0.975051	45.1768	0.0943563	Cs
4.7362	2.14335	1.10005	45.1768	0.0338673	Cs
12.2878	8.80221	0.98745	6.162	0.123173	Coq10a
21.6992	7.75837	0.887746	6.162	0.452835	Coq10a
6.31592	6.18639	0.979094	6.162	0.0443768	Coq10a
4	2	0.97095	5.40031	0.016701	Ankrd52
8.62332	3.02376	1.05959	5.40031	0.0307302	Ankrd52
20.3502	14.006	1.07376	5.40031	0.0229367	Ankrd52
18.1845	3.24984	1.01414	0.701261	0.175307	Slc39a5
4	4	1.12563	0.701261	0.00516784	Slc39a5
6.16765	4.38525	3.26484	0.701261	0.00648947	Slc39a5
21.3975	4.46332	0.996755	30.506	0.0134695	Nabp2
7.15385	3.3586	0.978492	30.506	0.0240968	Nabp2
14.0547	11.0761	0.939864	30.506	0.00140196	Nabp2
19.0847	3.9183	0.992664	1.51688	0.0852622	Rnf41
9.78451	2.37551	1.03355	1.51688	0.0402944	Rnf41
5.13904	0.34986	1.08422	1.51688	0.0555406	Rnf41
17.3783	3.40159	0.923691	25.4156	0.120079	Smarcc2
7.56257	6.81832	1.05578	25.4156	0.00861303	Smarcc2
4	4	1.05488	25.4156	6.49791e-05	Smarcc2
8.52277	2.1252	1.02512	146.208	0.0557788	Myl6
19.3437	12.5116	1.22631	146.208	0.0264562	Myl6
5.75291	0.830951	3.01104	146.208	0.0612098	Myl6
4.87142	2.75184	1.16996	0.701096	0.0446248	Myl6b
8.9033	0.844532	2.46536	0.701096	0.0563274	Myl6b
4	2	1.69846	0.701096	0.00867129	Myl6b
19.0342	0.105196	1.03139	0.881227	0.144429	A430046D13Rik
4.43689	1.9919	0.972728	0.881227	0.11654	A430046D13Rik
7.11744	0.928656	1.04561	0.881227	0.0270321	A430046D13Rik
4	6.91454e-18	1.00548	3.74434	0.0135503	Esyt1
28.0882	27.2723	0.92559	3.74434	0.245675	Esyt1
12.0635	2.53555	0.965211	3.74434	0.0868936	Esyt1
4	2	0.258425	3.74434	0.105961	Esyt1
20.2381	18.8689	1.02349	3.32328	0.0850236	Zc3h10
11.8021	11.5002	1.04091	3.32328	0.044231	Zc3h10
7.15492	2.73329	1.15545	3.32328	0.00617235	Zc3h10
16.3463	11.9427	1.0359	657.819	0.0464672	Rpl41
4	2	1.03233	657.819	0.020365	Rpl41
7.57764	3.64324	1.06672	657.819	0.0534908	Rpl41
23.1718	14.7372	1.00041	23.5126	0.0702206	Pa2g4
13.3052	11.7101	1.05193	23.5126	0.0265683	Pa2g4
7.22054	0.890863	1.0655	23.5126	0.0303013	Pa2g4
11.7482	5.61781	1.03156	17.8682	0.223006	Erbb3
26.69	4.23263	1.02702	17.8682	0.163271	Erbb3
8.00495	3.25013	1.16204	17.8682	0.0891052	Erbb3
13.9765	10.6654	0.98307	375.526	0.0876048	Rps26
4	2	1.00859	375.526	0.00884679	Rps26
7.89348	2.73772	1.06363	375.526	0.0223252	Rps26
[truncated: 39,628 more rows]

## Sheet: XBP1 LKO all oscillations
period	biophase	decay rate	mean expression	relative amplitude	gene
22.2554	11.3082	0.956605	48.4699	0.125715	Iyd
12.4957	4.6755	1.04817	48.4699	0.0188324	Iyd
6.39213	4.65803	1.18736	48.4699	0.027914	Iyd
8.35662	4.88017	0.979915	0.495114	0.0692198	Plekhg1
27.234	0.199729	0.922632	0.495114	0.232739	Plekhg1
4.71555	2.38297	0.896303	0.495114	0.291862	Plekhg1
6.33236	3.68685	0.988545	0.579033	0.295384	Mthfd1l
19.9834	14.1198	0.939553	0.579033	1.37686	Mthfd1l
4	1.95653e-17	1.10052	0.579033	0.0335485	Mthfd1l
4	2	2.94795	0.579033	0.0308628	Mthfd1l
15.845	0.116289	1.19465	0.614822	0.0384723	Akap12
6.78392	6.52721	1.24629	0.614822	0.0268087	Akap12
5.27118	1.89572	1.39786	0.614822	0.0323081	Akap12
7.42341	4.49067	1.03531	1.23299	0.0591589	Zbtb2
19.3139	14.5585	1.06392	1.23299	0.068211	Zbtb2
5.00326	4.5785	1.12055	1.23299	0.0182691	Zbtb2
24.3485	14.9204	0.9805	13.0644	0.136338	Rmnd1
9.23573	3.40197	1.01369	13.0644	0.0382165	Rmnd1
4.92851	3.54323	0.922324	13.0644	0.102046	Rmnd1
22.6563	17.4182	0.997446	4.13773	0.12384	Armt1
11.2809	1.35581	1.03771	4.13773	0.0374396	Armt1
7.37027	3.43564	1.09317	4.13773	0.0164606	Armt1
11.8981	2.60132	1.00152	4.43502	0.195813	Esr1
23.3963	16.226	0.970687	4.43502	0.47465	Esr1
5.40174	4.40846	0.993766	4.43502	0.0920349	Esr1
24.6854	23.9173	0.982269	4.37088	0.471469	Syne1
11.3396	0.822952	1.01784	4.37088	0.0032089	Syne1
4	4	1.05243	4.37088	0.00116536	Syne1
5.74743	4.77204	0.90501	0.151736	0.397524	Syne1
10.5022	0.657884	0.896865	0.151736	0.400859	Syne1
22.38	3.50791	1.09077	0.151736	0.119855	Syne1
18.7707	12.0697	1.01113	0.842933	0.0696101	Myct1
4.85948	3.64579	1.43981	0.842933	0.0694587	Myct1
8.44002	4.99777	1.24837	0.842933	0.0109073	Myct1
10.4746	6.00392	0.994657	0.372113	0.23936	Fbxo5
6.92372	2.22831	0.971181	0.372113	0.184836	Fbxo5
4.96633	0.673268	0.962286	0.372113	0.152304	Fbxo5
12.0856	1.81738	1.00175	1.16934	0.0958313	Mtrf1l
4	2	0.60974	1.16934	0.0116619	Mtrf1l
7.57246	2.60658	0.977122	1.16934	0.000722934	Mtrf1l
25.2175	22.7437	1.0474	2.46409	0.171294	Cnksr3
7.08704	5.15651	1.04908	2.46409	0.0178356	Cnksr3
10.7677	4.90411	1.06922	2.46409	0.0236311	Cnksr3
7.45559	0.94794	0.988008	0.779758	0.136496	Lrp11
4	4	0.946302	0.779758	0.0545236	Lrp11
12.9564	10.6075	1.03048	0.779758	0.0311274	Lrp11
26.6332	7.50945	0.964687	9.05593	0.0947535	Pcmt1
10.0374	1.84616	0.952482	9.05593	0.0775843	Pcmt1
5.98382	2.72605	1.01924	9.05593	0.0211277	Pcmt1
23.6964	9.45044	0.926658	1.25845	0.162649	A630066F11Rik
11.1347	2.57795	1.06136	1.25845	0.0597073	A630066F11Rik
5.1075	0.861712	0.854617	1.25845	0.10413	A630066F11Rik
4	2	0.965089	1.72242	0.0738638	Nup43
21.0689	5.69057	0.925083	1.72242	0.297003	Nup43
4	2	1.33178	1.72242	0.034754	Nup43
4.4898	0.0650416	1.37123	1.72242	0.0554231	Nup43
19.1128	4.14469	0.962067	0.704159	0.286074	BC020402
4.46688	1.55011	0.990459	0.704159	0.0607816	BC020402
6.3335	0.0257628	0.976876	0.704159	0.126236	BC020402
27.5726	24.4193	1.00619	4.37444	0.072897	Lats1
8.53429	2.059	1.02963	4.37444	0.0395727	Lats1
4.39398	0.193784	1.03056	4.37444	0.0103304	Lats1
7.38213	0.735985	0.99204	6.24326	0.030488	Katna1
26.5599	1.81011	0.930197	6.24326	0.161989	Katna1
4	2	1.01488	6.24326	0.00999271	Katna1
4	2	0.773335	6.24326	0.0194364	Katna1
23.1758	11.7257	0.961893	15.3998	0.226307	Ginm1
10.1694	1.90569	0.986768	15.3998	0.0693237	Ginm1
4.74074	3.00485	0.978054	15.3998	0.0433136	Ginm1
8.90877	2.20217	1.14693	4.66034	0.0402079	Ppil4
4.61544	4.5485	2.03429	4.66034	0.0036936	Ppil4
22.3248	6.05033	0.987194	1.29125	0.570066	Zc3h12d
7.62299	3.37786	0.969698	1.29125	0.303788	Zc3h12d
11.0769	6.7916	1.02905	1.29125	0.148776	Zc3h12d
25.0467	22.7159	0.974705	15.5943	0.332273	Tab2
12.7311	2.8414	1.03145	15.5943	0.0328344	Tab2
5.58221	4.84595	1.0792	15.5943	0.0187172	Tab2
5.58375	3.72326	0.913895	0.210506	0.235931	Ust
5.18326	1.66362	1.19948	0.210506	0.0138465	Ust
8.19754	6.7448	1.40262	0.210506	0.00765444	Ust
22.6732	3.21684	1.03564	4.4662	0.117865	Sash1
11.0389	5.62751	1.02873	4.4662	0.0591034	Sash1
7.63931	2.67074	1.05161	4.4662	0.0556688	Sash1
4.28911	2.50672	1.00151	1.53226	0.0522645	Stxbp5
25.3501	20.6681	0.933198	1.53226	0.229513	Stxbp5
8.06473	7.48133	1.13299	1.53226	0.00225292	Stxbp5
6.93091	0.608877	1.00337	0.254287	0.226643	Adgb
8.86762	2.19893	0.954228	0.254287	0.290372	Adgb
20.0806	4.44446	1.03769	0.254287	0.0649914	Adgb
23.685	23.0807	1.02676	10.448	0.184023	Rab32
5.7555	3.21241	0.954717	10.448	0.0886885	Rab32
11.0307	1.85567	0.948517	10.448	0.0786698	Rab32
10.0538	8.79809	0.999815	2.06465	0.0609611	Shprh
23.0384	5.57737	0.990121	2.06465	0.0872848	Shprh
7.41558	3.24528	1.04406	2.06465	0.0622899	Shprh
4.67563	0.77928	1.01404	1.42512	0.0248939	Fbxo30
10.3833	1.21744	0.859709	1.42512	0.211294	Fbxo30
22.5375	5.47156	1.04587	1.55043	0.283327	Epm2a
5.67059	2.11555	1.01215	1.55043	0.0715774	Epm2a
10.2861	7.39141	1.04589	1.55043	0.0350429	Epm2a
4.7575	3.04059	1.02385	2.33226	0.0490115	Utrn
7.90632	2.3615	1.07786	2.33226	0.034062	Utrn
24.5948	7.6843	1.14244	2.33226	0.0176364	Utrn
15.893	7.36475	1.01518	0.755287	0.76051	B230208H11Rik
9.29348	2.35791	1.11537	0.755287	0.044	B230208H11Rik
4	1.12834e-16	1.08557	0.755287	0.0121851	B230208H11Rik
4	2	2.25114	0.755287	0.0458239	B230208H11Rik
4.3407	3.21886	1.0718	0.256326	0.150321	Stx11
6.11703	2.36129	1.12639	0.256326	0.0598581	Stx11
5.19378	2.45004	0.954831	32.7525	0.104567	Sf3b5
15.6735	9.04526	0.854511	32.7525	0.179683	Sf3b5
4	2	2.07037	32.7525	0.00628382	Sf3b5
7.69334	2.66661	1.21833	0.329624	0.252968	Plagl1
4.90958	3.92525	1.25244	0.329624	0.0598007	Plagl1
19.8992	0.709778	1.23672	0.329624	0.0359008	Plagl1
12.658	9.48982	1.23164	6.62761	0.0116302	Ltv1
4.39753	4.10367	1.16188	6.62761	0.0066058	Ltv1
5.54519	2.56987	1.1975	6.62761	0.00393426	Ltv1
26.452	22.3713	1.05141	0.913194	0.0810742	Phactr2
4.37458	2.68377	1.11803	0.913194	0.0533402	Phactr2
6.05979	2.80466	1.16147	0.913194	0.0475331	Phactr2
20.3939	6.67693	0.977896	1.25641	0.280483	Fuca2
4.70971	3.88762	0.958153	1.25641	0.0842867	Fuca2
7.20661	2.52523	0.826742	1.25641	0.338286	Fuca2
9.8526	1.24235	1.00151	9.00737	0.0232706	Pex3
6.98469	1.86147	0.993326	9.00737	0.0424024	Pex3
22.539	7.842	0.943469	9.00737	0.255698	Pex3
22.0074	2.87199	1.04519	1.02696	0.15888	Adat2
5.1473	4.30922	0.967196	1.02696	0.0925204	Adat2
10.08	7.07186	1.1128	1.02696	0.0107714	Adat2
19.2594	5.07049	0.904287	6.8695	0.26141	Aig1
9.66055	1.44298	0.959991	6.8695	0.107509	Aig1
4.68895	0.120467	1.23734	6.8695	0.0204536	Aig1
5.85083	5.24833	0.999126	1.23374	0.175195	Hivep2
10.905	9.60931	0.996323	1.23374	0.108663	Hivep2
18.8188	12.384	1.13484	1.23374	0.0605145	Hivep2
4.16403	0.276564	1.16673	0.233602	0.0865471	Adgrg6
12.674	0.957178	1.71136	0.233602	0.110747	Adgrg6
6.56836	5.62093	1.34698	0.233602	0.0236377	Adgrg6
23.9691	6.3179	0.897641	7.28855	0.161317	Vta1
6.21885	0.965136	1.04065	7.28855	0.0284756	Vta1
4	2	0.560922	7.28855	0.0883616	Vta1
4	2	1.4131	7.28855	0.000774303	Vta1
11.8071	4.65581	1.00755	16.8924	0.220711	Cited2
8.55036	2.57769	1.00333	16.8924	0.0706887	Cited2
23.7009	1.6089	1.07017	16.8924	0.0880943	Cited2
17.1186	7.16465	0.715903	0.779988	7.70748e-05	Txlnb
7.4954	6.67593	0.736729	0.779988	6.02338e-05	Txlnb
5.29182	2.36308	0.798809	0.779988	3.97247e-05	Txlnb
11.0889	7.52639	1.01496	5.66597	0.0833144	Heca
26.6672	2.23629	1.02174	5.66597	0.116806	Heca
7.89387	3.40346	0.974951	5.66597	0.107622	Heca
23.1304	6.12875	0.993497	5.72778	0.144727	Abracl
4.72312	1.88807	0.945611	5.72778	0.136704	Abracl
9.77773	6.68896	1.03441	5.72778	0.0393609	Abracl
21.9404	4.76524	0.974297	6.18047	0.219565	Reps1
10.4719	6.74993	0.955633	6.18047	0.111245	Reps1
4.82639	0.942632	1.01571	6.18047	0.0264709	Reps1
11.8868	5.42692	0.999673	4.77924	0.165196	Ccdc28a
20.75	6.79999	0.994497	4.77924	0.193126	Ccdc28a
7.75267	1.79948	0.871125	4.77924	0.341363	Ccdc28a
26.5787	23.5944	0.889251	2.08929	0.577712	Nhsl1
9.9902	6.34623	1.02683	2.08929	0.0740639	Nhsl1
4	4	0.199385	2.08929	0.283574	Nhsl1
4	3.8034e-17	1.66851	2.08929	0.00260282	Nhsl1
7.63289	7.3213	1.06479	0.327113	0.45602	Hebp2
4	2	1.12491	0.327113	0.0676562	Hebp2
14.9859	7.1266	1.05442	0.327113	0.0253182	Hebp2
4	2	0.489061	34.3967	0.174154	Perp
11.8579	2.58778	1.10173	34.3967	0.0627143	Perp
6.45429	4.11948	1.84819	34.3967	0.0304603	Perp
4	2	1.15737	34.3967	1.16514e-05	Perp
6.23634	0.726231	1.15133	0.827244	0.0867425	Tnfaip3
19.1398	6.01621	1.13583	0.827244	0.0642637	Tnfaip3
4.5223	4.30012	1.17734	0.827244	0.0130511	Tnfaip3
23.4704	23.2212	0.92846	7.15038	0.167193	Ifngr1
11.4312	0.514093	1.05994	7.15038	0.0423868	Ifngr1
4.51071	3.32273	1.11358	7.15038	0.00459381	Ifngr1
22.6756	9.43643	0.966758	21.9139	0.225865	Pex7
8.12426	2.99516	1.04747	21.9139	0.0436831	Pex7
12.0398	5.09465	1.05003	21.9139	0.0330563	Pex7
9.87616	8.94583	1.06497	5.54023	0.118502	Map3k5
18.9355	7.25924	1.09333	5.54023	0.071381	Map3k5
4.57733	3.80522	1.01251	5.54023	0.00147705	Map3k5
24.1647	0.0900199	0.994014	8.42618	0.154335	Map7
8.78334	2.95431	1.04316	8.42618	0.0239248	Map7
4.47824	3.69837	1.07835	8.42618	0.0133346	Map7
7.37881	6.38472	1.08114	0.125833	0.72481	Gm6251
14.1102	9.59834	1.07203	0.125833	0.0410808	Gm6251
4.23962	1.7764	1.04017	0.125833	0.015254	Gm6251
22.015	5.62664	1.03212	6.66633	0.138428	Bclaf1
9.72969	1.0766	1.05304	6.66633	0.0127824	Bclaf1
7.30099	6.6803	1.14903	6.66633	0.00911999	Bclaf1
4.21779	2.45441	0.994192	1.77167	0.129856	Pde7b
5.24918	3.60446	0.960575	1.77167	0.186814	Pde7b
16.8321	16.6752	1.02857	1.77167	0.0907985	Pde7b
18.3779	0.222621	1.01541	0.232147	0.0969074	Ahi1
7.14631	1.53972	1.06708	0.232147	0.00929119	Ahi1
4.62482	2.69889	1.07513	0.232147	0.00963091	Ahi1
4.66826	0.886703	0.932175	15.4211	0.127581	Hbs1l
24.9559	3.31007	0.940685	15.4211	0.0900274	Hbs1l
7.47939	2.16877	1.0203	15.4211	0.0110329	Hbs1l
11.6185	5.02055	1.02468	132.969	0.0734234	Aldh8a1
20.8464	6.74266	1.05115	132.969	0.0427423	Aldh8a1
7.84234	3.61215	1.0563	132.969	0.044935	Aldh8a1
7.64817	1.12668	1.01805	6.15702	0.21579	Sgk1
5.22374	0.307319	0.959438	6.15702	0.39088	Sgk1
21.8624	18.8365	0.959735	6.15702	0.371273	Sgk1
21.7495	18.7688	0.950802	1.50577	0.418146	E030030I06Rik
7.4732	3.43374	1.01695	1.50577	0.0389272	E030030I06Rik
4	4	0.722342	1.50577	0.281577	E030030I06Rik
4	2	0.162744	1.50577	0.701821	E030030I06Rik
23.789	3.14587	0.992528	0.549321	0.479403	Raet1a
4.83373	3.48161	0.601527	0.549321	3.7181	Raet1a
10.4876	8.48182	1.05108	0.549321	0.0613144	Raet1a
21.5389	6.48933	0.964548	2.93587	0.707215	Raet1e
4.56343	3.38565	0.908317	2.93587	0.857437	Raet1e
6.142	2.73665	0.853874	2.93587	0.798903	Raet1e
21.941	6.96053	0.955924	0.728294	1.05411	Raet1c
4.63214	3.37721	0.908842	0.728294	1.13447	Raet1c
6.62675	1.97147	0.84856	0.728294	1.01999	Raet1c
21.7141	6.52956	0.97731	8.65187	0.658176	Raet1d
4.91176	3.15236	0.833864	8.65187	1.84957	Raet1d
11.6002	1.56486	1.02972	8.65187	0.044548	Raet1d
7.71066	6.63483	0.987252	1.83301	0.178054	Tbpl1
11.465	11.2268	1.01919	1.83301	0.140294	Tbpl1
33.3468	27.0769	1.21765	1.83301	0.421134	Tbpl1
38.4661	12.1142	0.954349	4.15763	0.244345	Tcf21
5.10338	2.13728	1.14142	4.15763	0.0472995	Tcf21
10.9307	5.42149	1.12621	4.15763	0.0228732	Tcf21
10.6988	4.84867	0.975878	122.823	0.0732772	Rps12
24.1142	20.2241	1.01544	122.823	0.0457856	Rps12
5.60114	0.451999	0.871275	122.823	0.204578	Rps12
22.2733	20.1574	0.980326	1.28256	0.249178	Slc18b1
9.90789	6.46715	1.01623	1.28256	0.0789813	Slc18b1
5.24825	2.55512	0.804345	1.28256	0.315295	Slc18b1
12.6119	0.767809	0.933103	17.6235	0.191951	Vnn3
4.9585	2.62728	0.898831	17.6235	0.282971	Vnn3
4	2	1.07152	17.6235	0.00973872	Vnn3
23.7411	9.16587	0.9639	19.3012	0.393082	Vnn1
5.0682	3.11407	0.904742	19.3012	0.530933	Vnn1
8.88834	1.92779	0.977652	19.3012	0.100922	Vnn1
11.6537	0.122295	1.00203	6.10758	0.0649102	Stx7
22.9019	22.0541	1.01449	6.10758	0.0920562	Stx7
6.51805	5.90782	1.05122	6.10758	0.00744005	Stx7
6.58929	5.86791	0.964371	8.98037	1.61731	Moxd1
12.4466	11.0928	0.968026	8.98037	1.35882	Moxd1
20.9132	0.982929	0.939719	8.98037	1.85412	Moxd1
5.48758	1.51428	0.951396	3.04427	0.648255	Ctgf
4	1.40851e-17	0.940154	3.04427	0.337031	Ctgf
14.6497	7.25799	1.11971	3.04427	0.1133	Ctgf
5.49649	3.30891	1.02105	3.33819	0.084151	Enpp1
10.5984	9.74424	0.9793	3.33819	0.0531375	Enpp1
23.0532	8.12137	1.12025	3.33819	0.0179106	Enpp1
24.5972	0.384433	0.995818	19.6357	0.336837	Enpp3
11.1546	7.12878	1.07013	19.6357	0.0353864	Enpp3
7.85626	2.19331	1.09173	19.6357	0.00363183	Enpp3
23.5699	1.70569	1.01892	2.19422	0.0739098	Med23
4.74777	0.421433	0.975924	2.19422	0.072817	Med23
9.69555	3.49318	1.09937	2.19422	0.0132948	Med23
22.2976	15.5621	0.922406	601.155	0.302377	Arg1
4.62565	2.41644	0.942503	601.155	0.078119	Arg1
6.85376	6.11454	0.842243	601.155	0.165763	Arg1
22.0967	10.5703	0.996131	1.61381	0.220033	Akap7
6.78452	4.93905	1.5571	1.61381	0.0935533	Akap7
4.81818	1.24047	1.49503	1.61381	0.0301174	Akap7
4	1.05383e-18	0.979294	2.94316	0.0384327	Epb4.1l2
5.63019	2.31863	1.24811	2.94316	0.0312781	Epb4.1l2
26.6989	4.53024	1.51025	2.94316	0.0325526	Epb4.1l2
4	2	6.2179	2.94316	0.049623	Epb4.1l2
11.5863	5.74334	1.00606	33.5026	0.0897315	Smlr1
5.05697	3.03758	0.983486	33.5026	0.0940382	Smlr1
20.714	6.46616	0.807793	33.5026	0.362049	Smlr1
7.67998	7.03107	1.06565	1.21524	0.0507649	L3mbtl3
20.8563	15.8147	1.06766	1.21524	0.0320086	L3mbtl3
4	4	1.13892	1.21524	0.0103129	L3mbtl3
4	2	1.55716	1.21524	0.00815188	L3mbtl3
10.4817	8.18298	1.00106	4.34832	0.0444726	Arhgap18
23.7362	4.69953	1.03315	4.34832	0.131935	Arhgap18
4.31379	3.6034	1.0364	4.34832	0.00377674	Arhgap18
6.86523	3.55693	1.07982	0.324537	0.0241692	Lama2
5.22456	1.10807	1.11207	0.324537	0.0303136	Lama2
19.2898	11.8352	1.10261	0.324537	0.0212092	Lama2
26.5436	24.961	1.01609	10.9153	0.153899	Ptprk
11.699	5.66064	1.0462	10.9153	0.0328835	Ptprk
8.14657	2.25712	1.08364	10.9153	0.00173491	Ptprk
22.2546	9.46813	0.953275	0.553153	1.54883	Themis
10.378	9.32378	0.891106	0.553153	1.67306	Themis
4.90008	3.28234	0.704325	0.553153	4.07287	Themis
7.77678	4.34723	1.02036	18.1816	0.0115572	Echdc1
4.65114	2.2225	1.04519	18.1816	0.0123468	Echdc1
6.9719	5.50863	0.862103	6.31218	0.169028	Rnf146
5.07312	2.81948	0.856625	6.31218	0.143567	Rnf146
12.7979	0.432968	0.912813	6.31218	0.0397966	Rnf146
21.7685	3.50533	1.00783	1.77169	0.143404	Rspo3
9.6186	1.00501	1.02111	1.77169	0.0115076	Rspo3
4.76605	4.42539	1.04897	1.77169	0.005288	Rspo3
16.4738	10.3603	0.939056	0.335333	0.351448	Cenpw
8.09754	1.64632	0.981127	0.335333	0.0972317	Cenpw
4.65333	0.201311	1.0198	0.335333	0.0377859	Cenpw
12.9306	1.90323	0.96238	1.38943	0.0915697	Trmt11
6.82067	2.16618	0.979543	1.38943	0.0456977	Trmt11
4	4	0.633647	1.38943	0.00043157	Trmt11
11.058	5.11816	1.03961	4.62059	0.0539969	Gm20300
4	4	1.05414	4.62059	0.0130017	Gm20300
14.0948	3.50619	1.07617	4.62059	0.0226982	Gm20300
6.05236	2.25882	0.98609	13.1643	0.0638613	Hint3
20.968	6.15523	0.77568	13.1643	0.543964	Hint3
10.2968	0.684033	0.874453	13.1643	0.221842	Hint3
4.2836	3.03943	0.949345	0.271852	0.192936	Ncoa7
6.23022	2.56845	1.12759	0.271852	0.0808223	Ncoa7
19.2445	14.4587	1.12627	0.271852	0.0381925	Ncoa7
22.0703	6.00451	1.01503	0.84729	0.214272	Hddc2
5.9486	2.37342	1.01036	0.84729	0.024237	Hddc2
4.75375	3.85682	1.13063	0.84729	0.000896078	Hddc2
22.1025	10.6159	0.998482	5.01481	0.224211	Tpd52l1
11.4882	5.87475	1.1181	5.01481	0.102413	Tpd52l1
4	1.43501e-16	1.0293	5.01481	0.00370738	Tpd52l1
4.67233	0.431626	0.825795	0.142219	1.16872	Gm3258
6.73621	2.76762	0.578459	0.142219	1.45032	Gm3258
7.18406	3.71481	1.05491	0.142219	0.0128648	Gm3258
20.8745	17.9812	0.962092	6.78682	0.0816462	Rnf217
4.4924	0.775126	0.912412	6.78682	0.0783443	Rnf217
8.83012	5.03405	0.826656	6.78682	0.0734717	Rnf217
5.30312	2.14768	0.746091	0.603363	4.1867e-06	Trdn
17.124	15.8143	0.677595	0.603363	3.00976e-06	Trdn
7.60858	3.68415	0.685069	0.603363	6.36174e-07	Trdn
21.3707	4.04069	1.00276	1.00057	0.067153	Zufsp
7.1062	1.19317	1.0346	1.00057	0.049001	Zufsp
4	2	1.6527	1.00057	0.00968095	Zufsp
5.99908	1.69562	0.946128	12.9538	0.109786	Rwdd1
8.7248	4.35278	1.10152	12.9538	0.0155315	Rwdd1
14.1497	12.6131	1.15129	12.9538	0.0117752	Rwdd1
10.2839	8.21805	0.985042	1.16367	0.346168	Fam26f
5.77121	3.90099	0.484273	1.16367	0.691372	Fam26f
4	2	1.08025	1.16367	0.00124053	Fam26f
4	2.92488e-16	1.00304	1.36186	0.0173728	Dse
5.80278	2.75363	0.935663	1.36186	0.193046	Dse
8.57842	3.06898	1.02117	1.36186	0.0474196	Dse
9.70006	9.31305	0.99951	8.92011	0.0382044	Tspyl1
21.6205	4.02442	0.934626	8.92011	0.180967	Tspyl1
4.56038	0.654966	0.966309	8.92011	0.0410672	Tspyl1
23.4516	21.1904	1.00896	2.30528	0.442148	Tspyl4
4	4	0.906382	2.30528	0.0505227	Tspyl4
4	4	1.27511	2.30528	0.0531937	Tspyl4
10.2306	4.60304	1.16496	2.30528	0.00778534	Tspyl4
21.2282	8.53404	0.965489	4.98868	0.186674	Nt5dc1
12.8921	2.84955	1.03299	4.98868	0.052447	Nt5dc1
8.26353	2.80929	1.1106	4.98868	0.0253082	Nt5dc1
6.03737	3.41128	0.895183	0.881129	0.290488	Frk
16.5138	14.3812	1.03725	0.881129	0.0278176	Frk
8.13099	0.529104	1.1083	0.881129	0.0102366	Frk
6.77361	2.10897	0.983379	8.71099	0.0380464	Hdac2
4.83301	2.11688	1.23138	8.71099	0.0097402	Hdac2
4	2	3.81883	8.71099	0.00580514	Hdac2
4	4	1.4399	8.71099	0.000104802	Hdac2
6.5528	1.8979	1.10952	3.81083	0.0408974	Marcks
28.3853	24.6977	1.16918	3.81083	0.0146051	Marcks
9.35626	9.19471	1.11179	3.81083	0.00899828	Marcks
8.16657	3.2461	1.33221	0.666257	0.127996	Lama4
5.9018	2.81838	1.17093	0.666257	0.0541008	Lama4
14.9287	13.6751	1.25222	0.666257	0.058713	Lama4
22.8716	7.97639	0.927361	0.217882	0.936779	Fam229b
4.43922	1.82122	0.967788	0.217882	0.288522	Fam229b
10.8246	9.38128	1.01464	0.217882	0.119224	Fam229b
21.2157	5.09074	1.00449	0.285685	0.324114	Tube1
4.95966	3.36514	0.960182	0.285685	0.0959816	Tube1
4.34609	2.76956	0.947698	0.285685	0.0012726	Tube1
5.13433	1.07132	0.994654	0.151058	0.219325	Wisp3
4	2	0.960644	0.151058	0.115713	Wisp3
28.4536	20.4937	0.697133	0.151058	1.38492	Wisp3
4	2	0.404358	0.151058	0.328658	Wisp3
6.13891	1.42323	1.0135	1.83296	0.071433	Fyn
9.61361	0.411302	0.97939	1.83296	0.0713741	Fyn
4.51837	2.30989	1.11826	1.83296	0.0767895	Fyn
11.1375	4.17844	1.00164	1.08168	0.195667	Traf3ip2
26.3806	22.3904	0.997194	1.08168	0.278208	Traf3ip2
5.50074	4.97277	1.02501	1.08168	0.0626202	Traf3ip2
23.8856	6.66392	1.02014	0.294313	0.250408	E130307A14Rik
4.31096	1.13382	0.989658	0.294313	0.0949445	E130307A14Rik
5.54155	3.7498	1.02444	0.294313	0.0839786	E130307A14Rik
9.62305	0.573616	1.01613	1.45805	0.0560187	Rev3l
5.71611	5.11496	1.08655	1.45805	0.137692	Rev3l
4.88763	2.02344	1.41537	1.45805	0.0253398	Rev3l
24.3566	1.44333	1.00612	0.597435	0.114999	AA474331
10.3889	9.47819	0.975782	0.597435	0.268659	AA474331
6.33127	4.00637	0.693826	0.597435	1.08807	AA474331
24.6531	23.6167	0.969143	6.50742	0.308422	G630090E17Rik
7.67294	1.25865	1.02681	6.50742	0.0311099	G630090E17Rik
4	4	0.816173	6.50742	0.0571825	G630090E17Rik
7.07001	1.95078	0.997673	0.23285	0.0945614	BC021785
5.34294	5.13657	0.944748	0.23285	0.310609	BC021785
18.9253	0.011276	0.86991	0.23285	0.600784	BC021785
23.5132	10.2179	0.981864	11.7264	0.183789	AI317395
7.76251	3.56994	1.2271	11.7264	0.0819452	AI317395
10.9096	2.68332	1.20415	11.7264	0.00654247	AI317395
11.9526	11.6358	1.00647	26.0995	0.0580676	Slc16a10
4.68672	0.75031	0.949609	26.0995	0.167183	Slc16a10
20.3321	14.3044	1.03872	26.0995	0.0808666	Slc16a10
10.6192	4.05968	1.01309	4.21479	0.0614985	Rpf2
23.64	14.8165	0.955481	4.21479	0.126234	Rpf2
5.60949	0.780189	1.02414	4.21479	0.0329244	Rpf2
11.9271	3.14287	0.943586	8.8873	0.179913	Gtf3c6
6.77759	1.00316	1.09197	8.8873	0.0360549	Gtf3c6
6.18158	2.22428	1.12767	0.656788	2.80183	Amd1
4	2	1.40268	0.656788	0.19802	Amd1
13.0442	10.3422	1.16515	0.656788	0.143313	Amd1
23.3332	10.6264	1.08526	10.3799	0.129975	Amd2
6.31271	1.07747	1.16386	10.3799	0.12496	Amd2
10.7048	9.58799	1.14973	10.3799	0.0526013	Amd2
23.6194	6.05177	1.02519	1.33423	0.0739519	Cdk19
6.35611	0.871853	1.06801	1.33423	0.0630702	Cdk19
9.88022	9.65837	1.03548	1.33423	0.00492791	Cdk19
24.1115	12.9918	1.02988	6.12073	0.160271	Ddo
4.9462	3.36822	0.794105	6.12073	0.291593	Ddo
7.0178	5.21669	1.06631	6.12073	0.0223216	Ddo
20.0981	9.13916	1.06871	5.62659	0.0236457	Cdc40
9.88913	9.22657	1.06491	5.62659	0.00937299	Cdc40
6.181	6.02344	1.15993	5.62659	0.0202223	Cdc40
4.84361	3.68995	0.994277	0.64604	0.0435088	Wasf1
26.0367	18.0617	0.932008	0.64604	0.418247	Wasf1
12.1508	2.53362	0.922747	0.64604	0.357271	Wasf1
4.19789	0.865219	0.986995	3.76826	0.0906598	Fig4
8.44308	1.9132	0.987264	3.76826	0.0589374	Fig4
19.8865	9.18799	0.924349	3.76826	0.201006	Fig4
11.6778	10.2617	1.01486	3.94615	0.0443909	Zbtb24
23.8692	20.1405	0.934141	3.94615	0.192808	Zbtb24
6.29584	3.52706	1.04115	3.94615	0.024565	Zbtb24
30.5239	0.914828	1.00643	0.460365	0.101609	Mical1
8.71206	7.00543	1.17463	0.460365	0.035122	Mical1
5.31934	0.944193	1.14915	0.460365	0.00978461	Mical1
7.47974	6.98579	1.04758	12.1841	0.0390136	Smpd2
11.5577	10.2604	1.06648	12.1841	0.0132606	Smpd2
15.2762	9.7751	0.856665	0.168412	1.54872	Ppil6
13.199	2.31883	0.673727	0.168412	3.07194	Ppil6
4.90802	1.77376	0.961805	0.168412	0.0726447	Ppil6
23.0599	2.11089	0.993125	94.4943	0.179479	Cd164
8.6053	2.46115	1.03311	94.4943	0.0292406	Cd164
5.14181	4.12262	0.949818	94.4943	0.0442169	Cd164
22.1504	2.92302	0.97698	0.735622	0.469408	Ccdc162
8.37836	2.08109	1.01511	0.735622	0.0250635	Ccdc162
4	2	0.581791	0.735622	0.0354225	Ccdc162
4	2	1.46969	0.735622	0.0315265	Ccdc162
4	1.80249e-18	0.938939	0.627815	0.267224	5730435O14Rik
19.6896	4.7479	1.03981	0.627815	0.240924	5730435O14Rik
5.57638	1.46784	1.13139	0.627815	0.129089	5730435O14Rik
19.8426	6.76167	0.830741	1.22921	0.604308	Cep57l1
4	1.42957e-16	1.02729	1.22921	0.0131121	Cep57l1
4	4	0.535942	1.22921	0.191493	Cep57l1
7.97817	1.689	0.844241	1.22921	0.0823066	Cep57l1
22.6516	5.68823	1.02777	3.60806	0.136102	Sesn1
10.393	6.59421	1.02924	3.60806	0.0421607	Sesn1
5.85234	2.80655	1.0367	3.60806	0.0320062	Sesn1
8.20039	2.61351	0.997688	9.02065	0.0440372	Foxo3
22.2401	11.2715	1.03119	9.02065	0.217127	Foxo3
4	0	1.03353	9.02065	0.00138713	Foxo3
7.38503	2.49515	0.99179	3.79764	0.0239634	Lace1
4	5.36081e-17	1.01529	3.79764	0.00941762	Lace1
5.60958	1.85079	0.565761	3.79764	0.013836	Lace1
11.2113	4.24673	0.990068	53.5086	0.0504794	Snx3
23.4224	18.3968	0.935309	53.5086	0.19654	Snx3
5.07677	3.34123	0.970302	53.5086	0.0495344	Snx3
11.1738	10.5719	1.01044	3.61312	0.0491899	Ostm1
4	4.40654e-18	0.985666	3.61312	0.00405963	Ostm1
7.4645	0.0713798	1.04958	3.61312	0.00727455	Ostm1
22.6284	0.111334	1.03634	16.1385	0.0712436	Sec63
6.22022	4.84679	1.05778	16.1385	0.0212561	Sec63
9.66215	2.42539	1.14692	16.1385	0.00035217	Sec63
21.351	4.02664	0.959735	4.57306	0.225069	Pdss2
5.92429	3.39422	1.02956	4.57306	0.0160533	Pdss2
10.5727	7.79444	1.29295	4.57306	0.0336852	Pdss2
15.6758	4.53853	0.904044	1.2621	0.163759	Bend3
5.08557	1.54964	1.04153	1.2621	0.0360247	Bend3
8.0888	1.11656	1.0502	1.2621	0.0305465	Bend3
20.9907	6.00764	1.03289	13.4061	0.0844329	1700021F05Rik
6.14716	0.0785688	1.06203	13.4061	0.0343216	1700021F05Rik
8.2083	6.45654	1.07661	13.4061	0.013558	1700021F05Rik
6.45541	3.96452	1.03847	2.94734	0.161202	Cd24a
11.8083	0.617182	1.25381	2.94734	0.0311727	Cd24a
4.88822	3.57732	1.25554	2.94734	0.026746	Cd24a
11.3205	9.87823	0.986353	2.19696	0.107267	Qrsl1
8.75686	1.67364	1.52741	2.19696	0.175385	Qrsl1
4	5.75499e-16	1.99092	2.19696	0.000150295	Qrsl1
24.1827	10.1996	0.908345	8.84471	0.173422	Rtn4ip1
8.60533	2.39415	0.933082	8.84471	0.121282	Rtn4ip1
4.63887	4.28142	1.06253	8.84471	0.0298489	Rtn4ip1
9.08847	2.05224	0.996975	3.57429	0.0861698	Aim1
22.7068	8.8132	0.962064	3.57429	0.272205	Aim1
6.62845	4.57788	1.08625	3.57429	0.018419	Aim1
22.5912	6.68218	0.915221	15.3438	0.191658	Atg5
5.02879	3.23312	0.848636	15.3438	0.202261	Atg5
12.616	0.183433	1.02062	15.3438	0.00715901	Atg5
7.9802	5.09209	0.979092	15.1305	0.0591657	Prep
4	2	0.935383	15.1305	0.0282052	Prep
14.6222	0.826029	1.17269	15.1305	0.00603174	Prep
25.8385	2.98336	0.963708	0.573472	0.239265	Hace1
4.69935	1.60455	1.06045	0.573472	0.0129889	Hace1
6.7578	0.439036	1.06725	0.573472	0.00647948	Hace1
24.9272	23.1185	0.975328	3.57726	0.104136	Ascc3
4.81358	0.985013	1.01104	3.57726	0.0369404	Ascc3
9.6701	1.0629	1.04442	3.57726	0.0114441	Ascc3
23.6472	6.38995	1.00438	0.996197	0.280592	Lilr4b
6.59995	2.32263	0.944019	0.996197	0.351323	Lilr4b
8.99801	8.57354	0.947653	0.996197	0.124824	Lilr4b
20.54	7.9611	0.975003	2.17246	0.324931	Lilrb4a
9.40217	0.433139	0.985692	2.17246	0.165066	Lilrb4a
6.74635	1.68865	0.965871	2.17246	0.201486	Lilrb4a
15.8238	5.87659	0.53714	0.508078	7.5429e-05	Vgll2
7.43689	6.25309	0.511834	0.508078	7.32904e-05	Vgll2
5.26596	2.11959	0.538161	0.508078	2.55166e-05	Vgll2
6.86719	2.97291	1.12697	0.910498	0.125957	Dcbld1
4	2	1.26547	0.910498	0.0546935	Dcbld1
11.6756	3.41308	1.20424	0.910498	0.00285737	Dcbld1
12.7266	10.0916	0.988525	6.25005	0.0594794	Gopc
21.8878	17.7985	0.880545	6.25005	0.125615	Gopc
5.87224	4.02999	1.22288	6.25005	0.0256231	Gopc
10.9412	1.6589	1.00627	7.58903	0.048849	Nus1
22.0614	16.4808	1.01247	7.58903	0.0710652	Nus1
4.97236	0.658972	1.00323	7.58903	0.0143935	Nus1
12.2333	9.35771	1.00074	3.27055	0.0704706	Cep85l
5.30611	0.0600062	0.970535	3.27055	0.252784	Cep85l
4	7.7932e-16	1.15253	3.27055	0.00102946	Cep85l
19.729	5.22375	1.01694	0.69022	0.122521	Mcm9
10.6237	6.74442	1.04345	0.69022	0.0613816	Mcm9
7.92011	3.90248	1.06648	0.69022	0.0454786	Mcm9
4	4	0.999805	2.41482	0.00360753	Asf1a
15.2856	7.91543	0.815426	2.41482	0.525656	Asf1a
7.24613	3.32498	0.793333	2.41482	0.167605	Asf1a
6.38056	0.212557	0.928848	0.0266798	0.934287	Fam184a
4.4992	3.76461	1.08161	0.0266798	0.30758	Fam184a
18.1735	15.7802	1.05633	0.0266798	0.159927	Fam184a
8.72646	2.8972	0.928702	40.1691	0.0960472	Man1a
5.1245	4.66075	0.84499	40.1691	0.142442	Man1a
6.8806	1.17529	0.837421	40.1691	0.149124	Man1a
22.591	6.52733	1.00774	0.357475	0.442509	Gm16998
6.51811	4.72705	0.934346	0.357475	0.456836	Gm16998
10.8692	4.58115	1.02367	0.357475	0.0670552	Gm16998
8.69848	2.18147	1.02115	0.703946	0.0831895	Tbc1d32
20.0362	6.76102	1.04128	0.703946	0.0780719	Tbc1d32
6.34225	3.69087	1.03765	0.703946	0.0600739	Tbc1d32
10.6743	4.94904	0.99971	0.564183	0.115098	Msl3l2
23.6716	5.73197	0.894492	0.564183	0.738968	Msl3l2
4.58333	2.45095	1.03411	0.564183	0.0632335	Msl3l2
23.5686	7.61716	1.14948	1.2111	0.0392859	Gja1
4.78117	1.8137	1.30173	1.2111	0.00810916	Gja1
6.9736	1.42257	1.2308	1.2111	0.00392433	Gja1
11.4139	2.0434	0.903871	5.68821	0.158602	Hsf2
20.1086	2.05517	1.20313	5.68821	0.0364456	Hsf2
7.21017	5.32115	1.31214	5.68821	0.0212294	Hsf2
12.2159	3.3937	0.993939	47.9128	0.0381121	Serinc1
19.3054	11.6669	1.02017	47.9128	0.0466798	Serinc1
7.32719	5.41804	1.05555	47.9128	0.0117707	Serinc1
19.0642	6.61434	0.994179	1.65894	0.378064	Fabp7
6.92499	1.80656	0.877017	1.65894	0.481402	Fabp7
12.7828	10.8545	1.26963	1.65894	0.00141792	Fabp7
7.76425	2.20474	0.671375	16.9551	0.338708	Smpdl3a
15.9448	8.88302	0.846414	16.9551	0.147464	Smpdl3a
4.93043	3.77955	0.902087	16.9551	0.0822319	Smpdl3a
9.03063	1.42584	0.971964	3.79772	0.0892536	Gcc2
21.1684	6.79435	0.906837	3.79772	0.242566	Gcc2
4.98919	0.346521	0.921686	3.79772	0.0867293	Gcc2
31.1837	31.102	1.04014	2.90684	0.0806332	Lims1
6.36451	2.11482	1.21131	2.90684	0.029986	Lims1
4.86118	3.95983	1.14589	2.90684	0.00612618	Lims1
9.6865	1.45555	0.969016	8.16566	0.0543539	Ranbp2
5.241	4.77565	0.955011	8.16566	0.0639937	Ranbp2
8.13089	4.24152	1.04489	8.16566	0.0210732	Ranbp2
17.9107	4.17328	0.98859	0.799851	0.0529962	Ccdc138
7.19759	1.41193	1.08884	0.799851	0.0143963	Ccdc138
5.35443	2.86102	1.06939	0.799851	0.00587059	Ccdc138
5.97065	3.20559	0.999899	3.30186	0.080112	43718
10.7157	8.16131	1.01301	3.30186	0.0611922	43718
33.9878	7.28378	0.554604	3.30186	0.605545	43718
17.4382	17.3851	1.00436	1.62113	0.0547378	Sowahc
7.58354	4.95595	1.02178	1.62113	0.0388053	Sowahc
4.27765	3.68342	1.02318	1.62113	0.0324745	Sowahc
19.7103	16.4951	0.78985	2.57468	1.59687	P4ha1
9.88438	4.4039	0.970546	2.57468	0.192977	P4ha1
6.51621	5.04677	1.02205	2.57468	0.000206431	P4ha1
22.7579	1.11441	0.990694	15.975	0.205936	Pla2g12b
4	2	1.02196	15.975	0.05517	Pla2g12b
4.67965	2.69816	0.92047	15.975	0.222076	Pla2g12b
4.22271	2.37814	0.972006	5.42546	0.190639	Oit3
5.91577	4.01445	0.941717	5.42546	0.168317	Oit3
21.9407	3.73916	1.18043	5.42546	0.0701402	Oit3
11.8644	4.22042	1.00019	6.25285	0.112802	Mcu
24.1556	1.14374	0.991828	6.25285	0.321653	Mcu
4.8883	2.88277	0.818219	6.25285	0.288141	Mcu
22.1406	4.738	1.00766	9.81938	0.163786	Micu1
5.69644	2.98352	0.974836	9.81938	0.0305389	Micu1
14.6534	5.96056	1.01095	9.81938	0.0027728	Micu1
5.96307	3.83283	1.12807	22.8678	0.0187523	Dnajb12
11.1765	2.83101	1.13867	22.8678	0.0167356	Dnajb12
20.6728	4.24311	1.13817	22.8678	0.0161176	Dnajb12
24.1105	21.5919	0.992591	5.53705	0.78715	Ddit4
12.9491	10.2687	1.00608	5.53705	0.364962	Ddit4
8.50507	5.71089	1.01661	5.53705	0.227325	Ddit4
5.18113	3.13027	0.830281	15.4762	0.274033	Anapc16
15.459	15.267	0.901968	15.4762	0.103135	Anapc16
9.24186	6.84207	0.667023	15.4762	0.240976	Anapc16
20.4106	8.67935	0.937724	6.64386	0.182127	Ascc1
6.88886	2.60021	0.945523	6.64386	0.0538201	Ascc1
4	2	1.08397	6.64386	0.000907215	Ascc1
5.43054	0.71829	1.28847	0.375188	0.0323202	Spock2
7.64796	0.214998	1.28348	0.375188	0.0308283	Spock2
18.2601	8.5718	1.17288	0.375188	0.0110693	Spock2
5.81326	2.85818	0.914313	147.122	0.120158	Psap
20.2818	7.51297	1.02924	147.122	0.0369996	Psap
6.81321	5.63207	0.55721	147.122	0.0979334	Psap
6.07456	2.6481	1.01224	1.32255	0.0876644	4632428N05Rik
12.1551	11.0861	1.0722	1.32255	0.0378288	4632428N05Rik
4.54723	0.786309	1.08006	1.32255	0.0316775	4632428N05Rik
4.25477	3.05857	0.972711	1.34242	0.0893746	Slc29a3
8.00342	4.88719	1.07195	1.34242	0.0320774	Slc29a3
28.9714	20.5111	1.05457	1.34242	0.0485774	Slc29a3
23.0627	11.0977	0.994022	1.66483	0.504401	Unc5b
12.1026	10.4872	1.00724	1.66483	0.193815	Unc5b
7.61695	1.88181	0.959717	1.66483	0.137582	Unc5b
5.10099	3.10358	1.02423	174.863	0.167823	Pcbd1
4	2	0.944919	174.863	0.0385313	Pcbd1
7.08098	0.742597	1.28519	174.863	0.018467	Pcbd1
22.987	22.2511	0.992349	13.4734	0.286079	Sgpl1
5.97148	2.71407	0.934995	13.4734	0.145208	Sgpl1
11.0257	5.84239	1.04293	13.4734	0.0158574	Sgpl1
24.4657	7.46508	0.951457	0.28697	0.144314	Adamts14
7.10435	5.6558	0.976429	0.28697	0.0669899	Adamts14
4.58132	2.32191	0.814801	0.28697	0.0201119	Adamts14
19.313	5.14416	0.929993	2.43263	0.265134	Pald1
9.46984	1.29945	0.971786	2.43263	0.0863971	Pald1
4.79905	0.477113	0.879718	2.43263	0.219756	Pald1
18.0834	6.56309	0.953604	0.196172	0.48886	Nodal
4.37916	3.96468	0.957238	0.196172	0.267569	Nodal
13.1662	1.24764	0.777573	0.196172	0.748661	Nodal
4	1.58243e-17	1.00161	47.4145	0.0103185	Eif4ebp2
12.6139	1.53785	1.04643	47.4145	0.00813064	Eif4ebp2
8.06946	4.57741	1.07649	47.4145	0.00893682	Eif4ebp2
5.00547	2.63529	0.951029	2.68337	0.0303823	Lrrc20
16.3749	14.3277	0.712547	2.68337	0.112427	Lrrc20
8.73115	6.30502	0.899013	2.68337	0.000612243	Lrrc20
25.6359	20.5428	1.0302	96.1795	0.101569	Ppa1
7.96473	7.87868	0.964226	96.1795	0.07218	Ppa1
5.30049	4.50997	1.05638	96.1795	0.0137909	Ppa1
11.0556	10.8338	1.04402	18.6928	0.0221216	Sar1a
24.8017	10.725	1.09756	18.6928	0.0237156	Sar1a
7.25849	5.58982	1.07889	18.6928	0.0191623	Sar1a
5.29703	2.98233	0.962565	35.8693	0.0820209	Tysnd1
15.5277	14.544	1.05318	35.8693	0.00141342	Tysnd1
23.1709	13.9026	0.993149	12.2085	0.238758	Aifm2
4.96707	3.60608	1.03451	12.2085	0.0301193	Aifm2
10.86	1.8578	1.04765	12.2085	0.0168228	Aifm2
4	2	0.986606	0.577225	0.115884	H2afy2
23.3035	12.3197	1.03134	0.577225	0.118159	H2afy2
6.89814	3.89876	1.25136	0.577225	0.00821662	H2afy2
8.18267	4.40943	0.978403	0.781406	0.274883	Col13a1
5.798	2.10522	0.909323	0.781406	0.450028	Col13a1
4.56538	0.637923	0.877731	0.781406	0.532222	Col13a1
22.1062	6.69539	0.941163	1.02662	0.753482	2010107G23Rik
10.451	8.42151	0.98363	1.02662	0.191433	2010107G23Rik
5.52741	3.31442	1.0107	1.02662	0.115649	2010107G23Rik
14.063	8.24152	0.904086	0.681581	0.264322	Tspan15
6.35326	5.91292	1.12373	0.681581	0.0347743	Tspan15
4	2	1.22072	0.681581	0.0226349	Tspan15
8.08769	3.33772	1.08478	1.17579	0.135001	Hk1
11.4761	1.99089	1.1234	1.17579	0.0176455	Hk1
5.07772	4.80898	1.26735	1.17579	0.00857752	Hk1
24.2426	11.297	0.97089	5.94571	0.158859	Supv3l1
9.36782	3.24342	1.0151	5.94571	0.0270038	Supv3l1
4	0	1.04084	5.94571	0.0076359	Supv3l1
13.2268	8.7974	1.00713	0.306725	0.204504	4930507D05Rik
6.14643	5.27582	1.02682	0.306725	0.12814	4930507D05Rik
4.86159	0.21108	1.07341	0.306725	0.0613608	4930507D05Rik
24.7276	12.2724	0.969789	11.2902	0.110567	Vps26a
7.01666	3.07852	1.16643	11.2902	0.0225951	Vps26a
4.19055	1.23242	1.22634	11.2902	0.0155282	Vps26a
6.0611	2.04922	0.988775	6.01821	0.0848142	Srgn
4.5838	2.3469	1.08576	6.01821	0.0750625	Srgn
8.78835	4.33978	1.05394	6.01821	0.0224482	Srgn
4	4	0.943292	4.53434	0.0406	Kif1bp
21.0567	8.59878	1.13617	4.53434	0.0798463	Kif1bp
5.39976	1.65202	1.20952	4.53434	0.00326789	Kif1bp
21.1329	16.8059	1.04983	7.07461	0.0519803	Ddx21
4.40764	0.764071	0.89781	7.07461	0.0907045	Ddx21
11.6716	10.9279	1.08988	7.07461	0.047926	Ddx21
26.3486	15.67	0.965604	10.8051	0.0624938	Ddx50
10.6606	3.92435	0.899203	10.8051	0.0986364	Ddx50
7.29945	0.919887	0.586981	10.8051	0.323437	Ddx50
19.9054	15.1571	0.931552	6.51044	0.226986	Ccar1
11.2756	0.395415	1.02845	6.51044	0.0574974	Ccar1
4.70463	0.529798	0.971785	6.51044	0.0263312	Ccar1
8.46376	2.75968	0.984712	19.457	0.0669559	Slc25a16
25.1274	10.4175	0.95341	19.457	0.154692	Slc25a16
5.13662	3.92061	1.0918	19.457	0.0261482	Slc25a16
22.5476	21.6026	1.00288	2.02429	0.171895	Dna2
6.16592	0.142623	1.05462	2.02429	0.0400423	Dna2
10.366	9.78779	1.22873	2.02429	0.0600949	Dna2
20.8751	6.14726	1.00122	0.833046	0.0740601	Rufy2
6.36148	4.57179	1.02163	0.833046	0.0770163	Rufy2
9.56479	0.209966	1.10404	0.833046	0.00920879	Rufy2
18.6799	15.6201	0.769689	3.61605	0.476096	Hnrnph3
5.00942	3.14757	0.943968	3.61605	0.114595	Hnrnph3
11.0017	5.42864	1.072	3.61605	0.0395956	Hnrnph3
5.82384	2.33252	0.986151	49.5029	0.0720359	Pbld2
26.232	8.83143	0.942982	49.5029	0.180693	Pbld2
7.8596	4.01736	0.963838	49.5029	0.0805829	Pbld2
24.2278	8.69444	0.928792	80.454	0.39506	Pbld1
9.09289	1.60892	0.979677	80.454	0.0679671	Pbld1
5.32831	2.99576	0.930769	80.454	0.0807991	Pbld1
17.0369	10.5002	0.701432	0.36284	0.00400473	Mypn
7.44617	4.58181	0.764016	0.36284	0.00113413	Mypn
5.26674	2.10549	0.825435	0.36284	0.000576424	Mypn
9.68709	9.40627	0.997498	9.41781	0.0314695	Herc4
5.40861	4.20605	0.949816	9.41781	0.0598369	Herc4
4	2.66139e-17	1.01076	1.88817	0.00998014	Sirt1
4	1.90572e-18	0.253396	1.88817	0.386274	Sirt1
8.53354	3.80486	1.08992	1.88817	0.0173774	Sirt1
6.00559	1.59751	1.11032	1.88817	0.0010258	Sirt1
21.5244	0.53199	0.996569	4.02058	0.273603	Dnajc12
7.61205	0.598442	0.930275	4.02058	0.619039	Dnajc12
5.80591	4.89669	0.915036	4.02058	0.515889	Dnajc12
16.2374	15.4816	0.906023	14.839	0.139638	Reep3
4.52186	3.12079	0.845421	14.839	0.108305	Reep3
4	0	1.10109	14.839	0.00105456	Reep3
5.83046	3.73036	0.991463	4.36582	0.0799945	Jmjd1c
25.5317	22.6371	0.933189	4.36582	0.254248	Jmjd1c
14.8252	12.9188	0.935246	4.36582	0.0132695	Jmjd1c
5.20783	2.88586	0.913751	13.9528	0.110615	Nrbf2
10.0411	4.56808	1.14053	13.9528	0.0361251	Nrbf2
21.0207	20.9202	0.993416	3.96127	0.103808	Ado
11.6807	9.94455	1.03955	3.96127	0.0183969	Ado
7.15316	3.27287	1.05521	3.96127	0.00191786	Ado
10.82	0.457521	0.978706	9.70343	0.307197	Arid5b
19.298	13.6735	1.02725	9.70343	0.295627	Arid5b
6.60435	4.23926	1.04127	9.70343	0.203775	Arid5b
21.3992	10.035	0.997193	1.01275	0.572144	1700040L02Rik
8.45462	2.70085	1.0297	1.01275	0.154312	1700040L02Rik
12.5864	4.47662	1.18478	1.01275	0.0135337	1700040L02Rik
9.6829	0.300637	1.0072	0.210507	0.0873959	Tmem26
4	4	0.958729	0.210507	0.106728	Tmem26
4	2	0.723301	0.210507	0.192123	Tmem26
23.6606	22.2628	1.09007	0.210507	0.0722742	Tmem26
5.12253	1.48533	0.994236	12.8014	0.0694558	Rhobtb1
21.6409	14.53	0.952893	12.8014	0.434447	Rhobtb1
10.5231	9.78259	1.07637	12.8014	0.0597149	Rhobtb1
7.13881	1.70972	0.971578	0.305969	0.164838	Cdk1
12.6287	10.6788	1.03547	0.305969	0.177248	Cdk1
19.352	4.77261	1.12721	0.305969	0.0250621	Cdk1
5.34411	0.98656	0.998464	1.99975	0.163748	Ank3
23.0868	8.24677	1.03402	1.99975	0.236338	Ank3
9.14867	4.90565	1.47182	1.99975	0.0916542	Ank3
25.9672	24.1696	0.964402	4.96463	0.149157	Ccdc6
4.07404	0.840931	1.09111	4.96463	0.0963509	Ccdc6
6.98702	2.63384	1.0559	4.96463	0.0053578	Ccdc6
15.639	7.26141	1.0368	0.792789	0.0645639	Slc16a9
4.83634	3.7696	1.12236	0.792789	0.0739755	Slc16a9
7.40284	1.85129	1.18739	0.792789	0.0140055	Slc16a9
6.77251	3.32053	1.04612	1.47395	0.111356	Bicc1
11.5621	3.06856	1.03628	1.47395	0.0369452	Bicc1
34.1249	15.0456	1.12521	1.47395	0.00186716	Bicc1
20.4	3.96529	0.960763	2.57234	0.41945	C730027H18Rik
11.5071	5.2092	0.981708	2.57234	0.190297	C730027H18Rik
4	2	0.477341	2.57234	0.00472165	C730027H18Rik
21.7958	8.41097	0.908375	6.20604	0.151204	Tfam
11.2259	7.00686	1.03489	6.20604	0.0172767	Tfam
4	2	0.558417	6.20604	0.0998531	Tfam
4.57393	2.29214	1.02537	5.22388	0.0377536	Ube2d1
7.19946	0.809764	1.03245	5.22388	0.0405178	Ube2d1
22.1917	16.9244	1.08731	5.22388	0.0556119	Ube2d1
8.88218	1.42997	0.989422	80.1608	0.0591457	Cisd1
25.5819	7.7473	0.911636	80.1608	0.350151	Cisd1
6.12777	1.427	0.97434	80.1608	0.0752493	Cisd1
4.96698	0.981329	0.996375	8.96095	0.0186004	Ipmk
18.5839	14.2539	0.925351	8.96095	0.173603	Ipmk
9.80205	6.10139	1.27243	8.96095	0.0545404	Ipmk
19.5658	11.7915	0.971223	24.3108	0.15238	Zwint
5.95233	2.76369	0.982734	24.3108	0.0323643	Zwint
11.87	4.34616	0.887768	24.3108	0.156618	Zwint
21.8618	1.91706	0.992419	0.340368	0.51154	Rab36
4	2	0.99416	0.340368	0.152835	Rab36
6.43132	0.650928	1.01946	0.340368	0.049855	Rab36
4	2	0.118506	0.340368	0.367034	Rab36
26.254	21.7888	0.930861	6.57472	0.279163	Bcr
11.3316	9.26263	0.97348	6.57472	0.0785283	Bcr
7.31849	2.54448	1.04019	6.57472	0.0277109	Bcr
46.3117	33.0633	1.14911	3.18338	0.0297294	Specc1l
4	2	2.03253	3.18338	0.0334623	Specc1l
6.58036	4.11364	1.168	3.18338	0.0102205	Specc1l
4	1.11863e-16	1.43704	3.18338	0.0017486	Specc1l
6.05509	0.808798	0.937753	0.645244	0.171758	Adora2a
18.4981	12.3788	1.06164	0.645244	0.067009	Adora2a
4	2	1.05011	0.645244	0.000335374	Adora2a
23.5933	12.2064	0.923456	74.8636	0.164181	Upb1
11.34	4.04779	0.899538	74.8636	0.145103	Upb1
6.88533	0.266606	0.901977	74.8636	0.0680074	Upb1
21.8858	1.19652	0.99436	43.4935	0.111419	Gucd1
8.34147	2.31796	0.990058	43.4935	0.0357476	Gucd1
5.84456	1.09576	0.963988	43.4935	0.0753879	Gucd1
4.85301	3.52695	1.00348	45.8466	0.0292335	Snrpd3
11.8177	3.6108	0.969739	45.8466	0.0680696	Snrpd3
21.2779	2.45671	1.19934	45.8466	0.0110681	Snrpd3
6.19772	3.8171	0.968276	0.0895446	0.55328	Ggt1
4.76677	1.70076	1.04436	0.0895446	0.293852	Ggt1
21.3785	17.5222	1.10943	0.0895446	0.367854	Ggt1
18.4929	12.5319	1.0027	0.521274	0.241191	Ggt5
4	4	1.01791	0.521274	0.194429	Ggt5
4	2	1.09528	0.521274	0.148964	Ggt5
8.95121	1.58121	1.20166	0.521274	0.039996	Ggt5
6.17665	5.01484	1.00249	1.02116	0.0445813	Susd2
4	2	1.08443	1.02116	0.00556038	Susd2
10.3721	5.18656	1.41643	1.02116	0.0223938	Susd2
20.4816	7.95455	0.883187	3.17773	0.304411	Cabin1
5.36284	5.06711	0.931208	3.17773	0.146919	Cabin1
8.2026	0.972867	1.06552	3.17773	0.0786332	Cabin1
24.4417	13.16	0.979123	397.158	0.0837808	Ddt
4.26071	0.897889	0.918229	397.158	0.112363	Ddt
5.86355	2.21626	0.890933	397.158	0.0959714	Ddt
4.78439	3.21921	0.588347	24.0189	2.08578	Gstt3
17.6061	14.2893	0.950308	24.0189	0.1982	Gstt3
6.25946	0.978314	0.943845	24.0189	0.163774	Gstt3
7.00883	5.69123	0.968497	201.134	0.0996462	Gstt1
5.05034	3.03647	0.843002	201.134	0.475727	Gstt1
4	2	0.941656	201.134	0.0548524	Gstt1
5.8611	2.06755	0.9969	18.2569	0.103332	Gstt2
22.3642	12.2658	0.95689	18.2569	0.573832	Gstt2
4	2	1.01748	18.2569	0.0485761	Gstt2
4	4	1.49666	18.2569	0.0118251	Gstt2
23.695	13.1349	0.992997	243.307	0.112675	Mif
5.419	1.9328	0.978449	243.307	0.0322868	Mif
8.76639	1.0709	1.05968	243.307	0.0102678	Mif
8.08677	7.36548	1.01365	3.93076	0.237035	Derl3
4	2	1.04822	3.93076	0.019191	Derl3
5.12505	4.79078	1.11565	3.93076	0.0127789	Derl3
11.238	2.36126	1.01723	10.5051	0.0811403	Smarcb1
19.6211	2.7392	0.929397	10.5051	0.0756981	Smarcb1
4	4	0.198511	10.5051	0.116295	Smarcb1
4	2	1.07056	10.5051	0.000375292	Smarcb1
21.0023	4.02205	1.03253	0.321005	0.279383	Mmp11
10.2374	3.752	1.25426	0.321005	0.179836	Mmp11
5.38783	4.92351	1.12745	0.321005	0.0768347	Mmp11
10.5968	3.43037	0.896713	457.747	0.116599	Chchd10
4	2	0.96216	457.747	0.0202644	Chchd10
6.481	0.411969	0.79252	457.747	0.195263	Chchd10
41.147	12.4265	0.945292	0.1612	1.01822	Vpreb3
8.83179	7.51794	1.42711	0.1612	0.959717	Vpreb3
5.58989	0.313773	1.64662	0.1612	1.2198	Vpreb3
24.0572	21.2183	0.993704	1.65584	0.187088	Zfp280b
5.58081	5.46889	1.00756	1.65584	0.0820925	Zfp280b
10.9442	9.01058	0.984337	1.65584	0.0154881	Zfp280b
5.12993	4.33888	1.41718	0.421324	0.0135381	Prmt2
7.81562	4.71659	1.46488	0.421324	0.0145886	Prmt2
26.1669	1.14188	0.967312	0.524951	0.191204	Dip2a
4.57919	2.70814	1.04222	0.524951	0.0874746	Dip2a
7.06431	3.37189	1.08432	0.524951	0.0742422	Dip2a
21.095	1.19029	1.0813	1.37135	0.113706	Pcnt
4	4	1.03888	1.37135	0.0214816	Pcnt
5.46005	1.38862	1.09346	1.37135	0.0129916	Pcnt
21.1601	1.52392	0.99222	3.99258	0.0640933	Mcm3ap
11.8049	10.3521	1.06873	3.99258	0.0144303	Mcm3ap
7.4154	4.29052	1.12445	3.99258	0.0202759	Mcm3ap
8.25053	3.06879	1.00181	0.850748	0.010874	Ybey
12.5273	9.96194	1.01206	0.850748	0.0349055	Ybey
35.6307	8.90057	0.562031	0.850748	0.26297	Ybey
4.8153	1.7927	0.935474	8.42929	0.324454	Lss
25.3531	21.903	1.07962	8.42929	0.179825	Lss
15.2624	9.42045	1.26817	8.42929	0.0221677	Lss
22.6685	19.0483	0.97106	0.118287	0.81243	4930483K19Rik
5.59872	1.85445	1.08501	0.118287	0.200984	4930483K19Rik
9.09145	1.31172	1.10658	0.118287	0.114249	4930483K19Rik
20.4836	1.84707	0.949852	0.237939	0.308895	Spatc1l
7.87646	6.94564	1.08452	0.237939	0.106337	Spatc1l
4.34874	0.990403	1.04472	0.237939	0.00363368	Spatc1l
27.3805	8.73299	0.92598	100.577	0.160987	Ftcd
5.7443	3.7309	1.02521	100.577	0.0260734	Ftcd
12.0502	3.27193	1.02884	100.577	0.00638992	Ftcd
5.23849	1.57681	1.11566	2.0077	0.0248961	Col6a2
18.9808	7.78597	1.13568	2.0077	0.0248391	Col6a2
7.00905	2.33238	1.09566	2.0077	0.0169822	Col6a2
7.13074	3.13229	1.05912	3.3606	0.0428346	Col6a1
5.21743	1.08895	1.08971	3.3606	0.0614201	Col6a1
19.2762	6.94747	1.11741	3.3606	0.054039	Col6a1
7.18735	4.45879	1.16018	0.222535	0.11645	Pcbp3
5.01826	1.39756	1.17501	0.222535	0.0635485	Pcbp3
44.5631	0.241196	1.59439	0.222535	0.0425476	Pcbp3
24.9438	8.98529	0.97439	1.8897	0.42638	Slc19a1
11.8781	8.78944	1.0406	1.8897	0.0759203	Slc19a1
4.38397	2.23544	0.912167	1.8897	0.045573	Slc19a1
22.6243	0.453664	0.978403	78.5408	0.209476	Col18a1
4.65728	2.13859	0.982489	78.5408	0.0945416	Col18a1
4	2	0.96932	78.5408	0.025231	Col18a1
10.0526	9.36595	0.972447	0.220335	0.491603	Gm10941
15.8077	0.381131	0.97508	0.220335	0.229605	Gm10941
5.36225	3.98721	1.1607	0.220335	0.0272475	Gm10941
7.72252	6.87925	0.970863	7.74522	0.0828065	Pofut2
19.1074	13.6296	0.776009	7.74522	0.158774	Pofut2
11.3846	0.495422	1.05267	7.74522	0.0265399	Pofut2
11.7529	10.2686	1.00784	2.00007	0.191071	Adarb1
23.3055	10.7386	1.02436	2.00007	0.231758	Adarb1
5.11378	3.71394	1.11072	2.00007	0.0291527	Adarb1
4.92011	3.5035	1.01707	11.5099	0.0200476	Fam207a
23.5188	5.92279	0.839234	11.5099	0.145676	Fam207a
9.42149	1.24422	1.21801	11.5099	0.00848047	Fam207a
4	4	1.00665	2.55028	0.0213032	Itgb2
5.78742	2.85184	0.968642	2.55028	0.198771	Itgb2
24.6604	24.5766	1.08221	2.55028	0.00336936	Itgb2
4	2	0.0393677	2.55028	3.46337e-05	Itgb2
20.6668	5.59902	0.991589	73.3469	0.103883	Pttg1ip
11.5973	5.11991	0.99133	73.3469	0.0319165	Pttg1ip
4.63586	3.26751	0.964233	73.3469	0.0441094	Pttg1ip
22.7094	0.883305	1.026	20.4882	0.156623	Sumo3
11.3472	5.14004	1.01789	20.4882	0.0370608	Sumo3
7.59974	2.34318	0.96364	20.4882	0.0289124	Sumo3
4.93573	0.309627	0.998987	15.2941	0.00981592	Ube2g2
21.2588	17.4692	0.906109	15.2941	0.333329	Ube2g2
10.7512	2.59572	1.02333	15.2941	0.0747544	Ube2g2
23.1016	20.4184	1.03531	21.9065	0.123299	Lrrc3
11.3578	3.97656	1.04734	21.9065	0.0501933	Lrrc3
4.52903	1.73145	0.791287	21.9065	0.0247687	Lrrc3
8.26434	3.83345	0.997983	0.648566	0.260867	Trpm2
6.32896	1.65638	0.978208	0.648566	0.176602	Trpm2
13.0847	10.1279	0.845171	0.648566	0.657605	Trpm2
5.85863	0.785396	0.983299	2.2767	0.0837992	1810043G02Rik
4	2	1.25397	2.2767	0.0412179	1810043G02Rik
10.183	6.49025	1.89966	2.2767	0.0807874	1810043G02Rik
19.8049	18.1352	1.02015	7.80446	0.0541278	Pfkl
9.3846	3.79009	1.33853	7.80446	0.0217525	Pfkl
4.49526	2.7014	1.09614	7.80446	0.00440856	Pfkl
6.59298	6.37237	1.12421	0.426832	0.561904	Icosl
4.19851	4.0457	1.05129	0.426832	0.152476	Icosl
31.9707	21.6167	1.32485	0.426832	0.20503	Icosl
24.503	9.98901	0.995444	48.644	0.106456	D10Jhu81e
6.20769	1.89516	1.03928	48.644	0.0152526	D10Jhu81e
12.6779	6.38685	1.07424	48.644	0.0191378	D10Jhu81e
4.77428	4.45862	1.00169	4.18889	0.0291991	Pwp2
20.7555	20.6598	1.01036	4.18889	0.0975959	Pwp2
12.2714	10.3637	1.07031	4.18889	0.0586932	Pwp2
5.89219	3.0705	1.00266	5.34421	0.0547941	Trappc10
10.6713	10.3942	0.973527	5.34421	0.0501399	Trappc10
16.1718	2.4232	1.01685	5.34421	0.018659	Trappc10
8.71747	3.47326	1.01139	44.1079	0.0434789	Agpat3
4	2	0.598982	44.1079	0.0549044	Agpat3
20.5416	7.22276	1.11797	44.1079	0.0154082	Agpat3
4.7596	0.00808333	0.993523	25.218	0.0245174	Rrp1
20.8785	7.50313	0.963236	25.218	0.0895313	Rrp1
5.75285	0.565792	0.949622	25.218	0.0479403	Rrp1
30.4096	8.73413	0.852603	42.7463	0.300603	Cstb
4.27435	4.11793	0.956458	42.7463	0.0719667	Cstb
6.323	1.78253	0.845879	42.7463	0.219594	Cstb
23.8698	13.8064	0.994709	14.3742	0.388381	Pdxk
12.0068	11.3449	1.01512	14.3742	0.127351	Pdxk
4	2	1.16221	14.3742	0.0206673	Pdxk
4	3.36615e-16	2.19508	14.3742	3.01728e-05	Pdxk
4.45942	2.17324	1.01809	4.92539	0.0357916	Ilvbl
10.6349	1.1375	1.02283	4.92539	0.0123439	Ilvbl
5.5697	2.04313	1.0462	4.92539	0.00510105	Ilvbl
4	2	1.9147	1.26331	0.0832539	Syde1
5.51006	2.34159	1.15706	1.26331	0.0165037	Syde1
4	4	1.50641	1.26331	0.0199481	Syde1
15.4917	6.14768	1.40908	1.26331	0.0087528	Syde1
11.7312	5.00461	0.999867	1.66232	0.0610671	2610008E11Rik
23.4013	3.12047	0.959885	1.66232	0.215588	2610008E11Rik
4.76576	4.74213	1.0866	1.66232	0.00224518	2610008E11Rik
12.0651	11.4221	1.0122	9.53106	0.061223	Ppap2c
7.73941	0.318658	0.977624	9.53106	0.0883239	Ppap2c
4.09213	0.243887	1.03103	9.53106	0.0564741	Ppap2c
24.0274	22.1274	1.00846	3.23232	0.0733646	Mier2
7.88993	0.326781	0.976127	3.23232	0.0768119	Mier2
12.5566	10.8155	1.06919	3.23232	0.0191972	Mier2
18.4088	5.9757	1.04355	16.3807	0.0638024	Tpgs1
4.73145	3.65461	0.944307	16.3807	0.0131379	Tpgs1
7.9368	7.84191	1.03419	16.3807	0.0066904	Tpgs1
20.1183	18.3251	1.05177	40.2579	0.0255578	Cdc34
10.5439	1.99977	1.06918	40.2579	0.0306495	Cdc34
7.75406	0.413862	1.08508	40.2579	0.0279528	Cdc34
15.3179	14.6685	1.02566	214.41	0.0395492	Bsg
5.05358	3.24879	0.851005	214.41	0.190519	Bsg
8.04917	7.6494	0.942757	214.41	0.0644137	Bsg
20.5347	17.6412	1.04361	0.261485	0.276478	Hcn2
6.69438	4.14329	0.966453	0.261485	0.175626	Hcn2
8.44752	7.69783	1.04797	0.261485	0.0551932	Hcn2
19.4768	5.23383	0.982142	6.43699	0.141803	Polrmt
8.93453	1.50548	1.00546	6.43699	0.0390512	Polrmt
5.95944	5.17564	1.02184	6.43699	0.00760045	Polrmt
26.9698	18.0336	0.94801	13.8823	0.0977158	Rnf126
5.29153	1.81313	0.959889	13.8823	0.0605621	Rnf126
10.6291	4.59626	1.02328	13.8823	0.0192252	Rnf126
4	2	1.06311	0.287249	0.129287	Fstl3
14.5243	13.0702	1.20372	0.287249	0.00794282	Fstl3
5.99944	1.62763	1.47002	0.287249	0.00902993	Fstl3
4	2	1.35989	0.287249	0.000963489	Fstl3
19.1797	17.9896	0.954427	1.76436	0.168213	Palm
5.51772	4.6846	1.5316	1.76436	0.0945793	Palm
6.71228	2.68637	1.27007	1.76436	0.0115906	Palm
4	2	0.992892	0.245555	0.0268025	Misp
6.15361	5.04187	0.933651	0.245555	0.180833	Misp
10.1936	5.89163	1.08478	0.245555	0.0467572	Misp
7.36664	4.30452	0.963021	0.147328	0.329861	E130317F20Rik
10.0104	7.86158	0.946787	0.147328	0.431713	E130317F20Rik
18.5294	5.06419	0.892312	0.147328	0.636881	E130317F20Rik
11.0422	1.725	1.07869	0.625184	0.0570949	Lppr3
5.36381	1.37037	1.07411	0.625184	0.0288208	Lppr3
11.3232	4.82398	0.998116	33.09	0.0570719	Ptbp1
6.41386	5.72716	1.08151	33.09	0.0230002	Ptbp1
21.09	0.928703	1.47153	33.09	0.0496946	Ptbp1
25.2846	20.8151	0.972037	0.824777	1.36744	Prtn3
7.90516	7.49187	0.966712	0.824777	1.42713	Prtn3
6.03034	4.25367	0.962313	0.824777	1.35326	Prtn3
5.85426	4.46793	0.968555	0.142072	0.698987	Elane
17.2174	9.43563	1.04381	0.142072	0.377623	Elane
4	2	0.767769	0.142072	0.164548	Elane
4	2	2.1811	0.142072	0.0571802	Elane
6.58567	3.39494	1.19953	1.89167	0.527744	Cfd
17.7896	3.94716	1.19936	1.89167	0.0348867	Cfd
4.6496	1.51543	1.37312	1.89167	0.0105498	Cfd
23.182	8.5307	0.965603	6.15572	0.218905	Med16
12.5705	9.20917	1.07002	6.15572	0.0101265	Med16
4	2	0.590971	6.15572	0.00217113	Med16
21.7301	9.77932	0.998801	22.0938	0.066077	R3hdm4
7.24944	3.61021	0.941571	22.0938	0.0589687	R3hdm4
4.25781	2.06277	1.07064	22.0938	0.00283363	R3hdm4
18.6635	6.43491	0.953212	0.170501	0.489236	Kiss1r
5.40609	2.14318	0.975341	0.170501	0.155403	Kiss1r
4	2	0.816486	0.170501	0.133199	Kiss1r
7.47646	3.23302	0.997406	0.297756	0.10921	Arid3a
27.6201	20.0724	1.03208	0.297756	0.111592	Arid3a
11.0999	5.24632	1.03878	0.297756	0.0522192	Arid3a
27.2215	11.7666	0.985805	17.3949	0.0974872	Wdr18
4	2	0.987634	17.3949	0.0213709	Wdr18
10.9123	0.855545	1.09755	17.3949	0.0183285	Wdr18
22.5426	7.06066	0.981955	0.109974	0.389304	Grin3b
4.37121	4.14729	0.989724	0.109974	0.118329	Grin3b
8.11968	3.53666	0.979621	0.109974	0.0704186	Grin3b
21.7358	8.91789	0.85959	45.0791	0.117268	Tmem259
8.59536	1.96751	0.968861	45.0791	0.0201225	Tmem259
5.57433	0.908705	0.924224	45.0791	0.0457013	Tmem259
34.9886	2.33637	1.06296	4.22647	0.0832923	Cnn2
6.19958	3.00906	1.3644	4.22647	0.0294657	Cnn2
4	2	1.72783	4.22647	0.00773553	Cnn2
20.4566	0.503728	1.03131	0.840829	0.132121	Abca7
5.11264	3.80157	1.39786	0.840829	0.0366562	Abca7
7.31003	2.21813	1.21869	0.840829	0.00423493	Abca7
5.99167	1.99722	0.923777	2.47027	0.136218	Hmha1
21.6701	6.06819	0.899695	2.47027	0.176845	Hmha1
4.45144	0.0106629	1.09562	2.47027	0.00912685	Hmha1
24.4069	8.20616	0.944229	18.8754	0.181693	Polr2e
6.09544	5.7193	1.00877	18.8754	0.0133594	Polr2e
5.34454	1.81065	0.947321	18.8754	0.0752116	Polr2e
8.22357	0.774888	0.990532	216.564	0.0336424	Gpx4
4.8509	2.89371	0.914678	216.564	0.0807369	Gpx4
23.2743	9.58171	0.883958	216.564	0.0996386	Gpx4
4.89865	0.532626	0.881232	5.50242	0.0241406	Sbno2
4	2	0.982966	5.50242	0.00111361	Sbno2
9.06187	7.63941	1.08257	5.50242	0.00192769	Sbno2
5.00085	3.2716	1.00113	28.1089	0.0217928	Stk11
21.3493	6.26283	0.934163	28.1089	0.115696	Stk11
6.09554	0.0372383	1.02873	28.1089	0.0180904	Stk11
7.71697	0.788367	0.964305	0.691763	0.256932	Dos
11.1456	2.36388	1.09544	0.691763	0.0915903	Dos
4	2	1.13553	0.691763	0.0533842	Dos
4	4	3.19446	0.691763	0.00543894	Dos
18.3646	14.7064	0.958651	237.188	0.158443	Atp5d
8.6646	5.29671	1.01614	237.188	0.050472	Atp5d
5.01349	2.50377	0.892088	237.188	0.129594	Atp5d
5.79062	5.45456	0.979238	14.923	0.102817	Midn
4	4	1.03849	14.923	0.0742657	Midn
18.3126	11.9724	1.15373	14.923	0.0252095	Midn
4	2	1.54579	14.923	0.0218349	Midn
22.0284	6.21915	0.943189	8.63764	0.896321	Cirbp
11.5171	5.95612	1.02606	8.63764	0.196839	Cirbp
8.00741	3.2446	1.04621	8.63764	0.0534465	Cirbp
6.7452	0.0736022	1.02349	3.7957	0.0354622	1600002K03Rik
15.5912	9.9262	0.975131	3.7957	0.0115377	1600002K03Rik
42.7996	0.209588	0.586729	3.7957	0.0143593	1600002K03Rik
4.88127	2.93702	0.978292	1.7119	0.0558927	Mum1
19.2834	5.77455	0.893178	1.7119	0.248752	Mum1
7.18879	1.70249	1.04651	1.7119	0.0362309	Mum1
10.8243	0.793968	1.16353	80.9839	0.0144807	Ndufs7
7.6486	3.53311	1.20077	80.9839	0.00753867	Ndufs7
5.52654	0.188881	1.2668	80.9839	0.00359931	Ndufs7
24.4758	11.0387	0.966425	183.031	0.301157	Gamt
6.72779	6.54398	0.982536	183.031	0.0506378	Gamt
4.85107	3.07935	0.890724	183.031	0.296797	Gamt
8.63309	5.73377	1.00182	19.1307	0.037279	Dazap1
21.6287	9.68554	1.01315	19.1307	0.12207	Dazap1
5.8663	0.696355	1.01314	19.1307	0.0210076	Dazap1
4	2	0.99789	408.082	0.0226931	Rps15
5.13176	2.03116	0.991881	408.082	0.033234	Rps15
18.9892	11.7838	0.802185	408.082	0.129596	Rps15
19.151	7.28814	0.876371	6.84566	0.331754	2310011J03Rik
5.65932	1.54751	0.928405	6.84566	0.0945237	2310011J03Rik
4	2.95892e-17	0.449785	6.84566	0.115021	2310011J03Rik
4	2	1.29415	6.84566	0.00249128	2310011J03Rik
23.6919	10.3721	0.956254	3.63876	0.872123	Pcsk4
12.152	9.66724	0.944882	3.63876	0.329761	Pcsk4
5.44837	2.22208	0.944422	3.63876	0.112912	Pcsk4
20.8975	14.636	0.877447	541.107	0.500599	Reep6
10.8509	4.86821	0.927468	541.107	0.174217	Reep6
5.15641	2.83244	0.931419	541.107	0.108799	Reep6
17.7184	9.92688	1.05795	0.51439	0.0184735	Adamtsl5
7.48868	5.45224	1.07742	0.51439	0.00865407	Adamtsl5
5.39388	0.343322	1.13795	0.51439	0.0116031	Adamtsl5
22.6195	15.8833	1.03591	0.830376	0.191856	Plk5
7.54964	3.85256	0.975476	0.830376	0.0893136	Plk5
12.2378	9.62621	1.02946	0.830376	0.103818	Plk5
20.7444	15.5167	0.966294	0.954369	0.194567	Mex3d
13.3581	9.18772	1.05824	0.954369	0.0287769	Mex3d
6.40043	5.72539	1.13529	0.954369	0.00472387	Mex3d
4	2	0.6622	23.2095	0.106246	Mbd3
8.73934	0.773616	1.0368	23.2095	0.0224001	Mbd3
16.0359	1.27086	1.04856	23.2095	0.019942	Mbd3
7.15103	4.42584	1.00856	349.821	0.0168481	Uqcr11
4.92752	2.91994	0.887597	349.821	0.149823	Uqcr11
28.1325	9.70048	0.94242	349.821	0.0266798	Uqcr11
14.0627	8.68207	0.806131	5.28749	0.517782	Tcf3
8.06987	3.91541	0.963697	5.28749	0.0838346	Tcf3
4	2	0.64926	5.28749	0.0760934	Tcf3
28.3165	21.7447	1.03898	6.29527	0.0199141	Rexo1
5.87426	5.33048	1.09443	6.29527	0.0130317	Rexo1
8.28171	3.77366	1.13766	6.29527	0.00757971	Rexo1
21.8764	11.388	0.995423	2.00719	0.223807	Klf16
12.3407	9.01042	0.977135	2.00719	0.166305	Klf16
7.70278	0.778371	1.01727	2.00719	0.0433398	Klf16
25.8472	9.90125	0.948181	29.5957	0.203444	Abhd17a
5.65265	2.21682	0.957322	29.5957	0.126074	Abhd17a
12.0784	9.6058	0.968167	29.5957	0.0810447	Abhd17a
5.86243	3.16152	1.02754	0.81833	0.131478	Adat3
9.70345	0.144511	0.963332	0.81833	0.0372887	Adat3
4	2	0.512907	0.81833	0.036964	Adat3
12.2497	10.3246	1.06498	12.7697	0.0190327	Scamp4
18.9639	7.10666	1.1422	12.7697	0.013115	Scamp4
7.83995	0.0375707	1.08749	12.7697	0.00426768	Scamp4
21.335	10.7076	1.00099	26.6404	0.0741034	Csnk1g2
5.3136	1.75647	0.897404	26.6404	0.0680909	Csnk1g2
9.47651	4.00929	1.09977	26.6404	0.0048758	Csnk1g2
22.0438	7.00852	0.83723	6.77472	0.369146	Btbd2
10.0129	9.72295	0.924812	6.77472	0.0719038	Btbd2
6.26345	0.956683	1.05494	6.77472	0.0256832	Btbd2
22.0901	11.7669	1.03628	31.9384	0.356726	Mknk2
6.20367	0.619787	1.04632	31.9384	0.0531452	Mknk2
10.3356	8.92283	1.098	31.9384	0.0653881	Mknk2
26.0714	22.1849	0.959231	1.70002	0.203168	Mob3a
4.85019	2.84028	0.894212	1.70002	0.231015	Mob3a
9.73561	9.45996	1.19144	1.70002	0.0773172	Mob3a
19.4057	8.77879	0.966258	3.23651	0.138594	Izumo4
4.7254	2.79451	0.705068	3.23651	0.492522	Izumo4
11.5714	5.38599	1.04811	3.23651	0.0421681	Izumo4
24.0941	23.1463	1.02329	11.3089	0.0702642	Ap3d1
10.9064	0.951615	1.17117	11.3089	0.0320352	Ap3d1
6.65053	2.41758	1.04641	11.3089	0.00798194	Ap3d1
24.8926	20.9895	0.929086	5.38801	0.247623	Dot1l
6.38453	3.97679	0.66508	5.38801	0.202213	Dot1l
11.4151	0.0927857	1.08353	5.38801	0.0261709	Dot1l
10.992	3.5442	0.993363	9.77204	0.040886	Plekhj1
5.55384	1.10374	0.981223	9.77204	0.0270244	Plekhj1
23.3958	23.2654	1.13811	9.77204	0.00734956	Plekhj1
10.5078	3.12154	1.03773	14.4793	0.0430207	Sf3a2
5.4801	1.06757	1.02786	14.4793	0.0288004	Sf3a2
4	2	1.2842	14.4793	8.22174e-05	Sf3a2
7.75164	5.61288	0.825382	1.01961	9.61651e-05	Jsrp1
5.33982	1.38865	0.886122	1.01961	4.18483e-05	Jsrp1
16.8749	12.4562	0.811796	1.01961	4.82541e-05	Jsrp1
12.3909	4.54709	0.986024	155.929	0.089144	Oaz1
5.6578	1.71234	0.954298	155.929	0.0713765	Oaz1
21.9638	8.24201	1.08498	155.929	0.0328303	Oaz1
6.20148	1.75219	0.991507	75.2831	0.0794503	Oaz1-ps
15.0819	7.21495	0.857453	75.2831	1.07426	Oaz1-ps
12.6276	1.44974	0.568197	75.2831	1.52071	Oaz1-ps
7.81469	0.822148	1.00407	16.8103	0.0299435	Lsm7
18.9703	5.09463	0.968346	16.8103	0.147689	Lsm7
5.38726	2.24332	1.07456	16.8103	0.0871466	Lsm7
7.6922	3.73257	0.927869	4.71772	0.124959	Sppl2b
22.9141	0.125562	1.06078	4.71772	0.061629	Sppl2b
6.25399	0.908718	1.03093	4.71772	0.00857326	Sppl2b
5.72745	1.97821	0.985356	28.7492	0.0345888	Timm13
4	2	1.03123	28.7492	0.0165633	Timm13
14.7343	12.6253	1.07593	28.7492	0.0106863	Timm13
25.6864	13.3594	0.988375	2.70486	0.204672	Lmnb2
12.0435	11.4384	1.05643	2.70486	0.0488653	Lmnb2
4.88236	0.481507	1.04945	2.70486	0.012265	Lmnb2
7.18381	7.09256	1.07355	0.586432	0.127969	Gadd45b
4.70363	4.31287	1.21595	0.586432	0.263313	Gadd45b
12.8797	6.46923	1.2593	0.586432	0.0285673	Gadd45b
22.3126	6.09532	0.760031	2.48573	0.675882	Slc39a3
10.6206	0.108055	0.912616	2.48573	0.172046	Slc39a3
6.52309	1.31613	1.09363	2.48573	0.00182943	Slc39a3
17.6878	12.5164	1.0059	29.8181	0.0546173	Sgta
10.8231	5.06373	0.985635	29.8181	0.0558076	Sgta
5.11197	2.6019	0.950946	29.8181	0.0702455	Sgta
6.67368	4.12746	1.18563	4.43267	0.0196894	Thop1
14.6946	10.4273	1.09119	4.43267	0.00755728	Thop1
4	2	1.24446	4.43267	0.00258035	Thop1
26.4644	8.11683	0.893119	96.66	0.295706	Creb3l3
5.09534	0.0452727	0.930096	96.66	0.0710294	Creb3l3
6.83952	0.323934	1.03439	96.66	0.00906757	Creb3l3
11.1244	9.21595	0.993699	36.2711	0.0173145	Map2k2
6.23216	2.35957	0.965436	36.2711	0.0726682	Map2k2
4	2	0.753224	36.2711	0.0131152	Map2k2
7.77007	3.56202	0.995317	12.8691	0.0695417	Zbtb7a
11.1372	0.988788	0.995423	12.8691	0.0360716	Zbtb7a
23.1689	15.9906	0.924767	12.8691	0.290932	Zbtb7a
4.24739	0.753567	0.944439	6.5695	0.11162	Pias4
10.3391	0.626087	0.957097	6.5695	0.0547556	Pias4
6.96144	3.77785	1.08762	6.5695	0.00800718	Pias4
5.14589	0.784284	1.00037	431.214	0.073912	Eef2
12.569	9.77746	1.00329	431.214	0.0184194	Eef2
7.6263	5.5959	1.00957	431.214	0.015116	Eef2
6.46798	1.35058	1.05487	12.7327	0.0357185	Dapk3
11.2606	3.27303	1.04633	12.7327	0.0250675	Dapk3
23.8122	20.9588	1.05173	12.7327	0.0257426	Dapk3
4	2.19178e-17	0.57143	33.6747	1.61053	Mrpl54
4	2	0.508736	33.6747	1.83272	Mrpl54
16.0829	12.2325	1.01721	33.6747	0.0453075	Mrpl54
7.83032	7.80961	0.94786	33.6747	0.0991992	Mrpl54
21.8802	18.9431	0.982441	17.4565	0.143774	Apba3
10.8179	1.82304	1.0333	17.4565	0.0696156	Apba3
7.80301	5.73884	1.12672	17.4565	0.00537416	Apba3
23.9949	23.0327	1.01395	11.2317	0.471112	Tjp3
5.26394	3.07549	0.814333	11.2317	0.328685	Tjp3
10.9762	1.76226	1.11201	11.2317	0.0316382	Tjp3
5.22968	2.82597	1.08705	7.77246	0.0973317	Pip5k1c
22.9288	3.56981	1.0587	7.77246	0.0504267	Pip5k1c
8.6297	7.97394	1.11697	7.77246	0.000608228	Pip5k1c
18.4736	1.26048	0.977137	5.09813	0.0175388	Cactin
11.9546	9.68684	1.04863	5.09813	0.0268671	Cactin
4	8.20275e-18	0.611155	5.09813	0.0133755	Cactin
4	2	1.14438	5.09813	0.000791839	Cactin
4.61658	0.825559	1.02195	0.557371	0.206848	Tbxa2r
5.99595	2.10082	0.966435	0.557371	0.246597	Tbxa2r
15.5298	6.71503	0.970161	0.557371	0.201246	Tbxa2r
36.5876	11.4835	0.891966	15.3001	0.201405	Hmg20b
5.10163	2.70629	0.927407	15.3001	0.0987335	Hmg20b
11.0934	7.58679	1.00529	15.3001	0.0051283	Hmg20b
7.06791	2.92096	0.915694	2.11291	0.153101	Mfsd12
17.9674	8.61132	1.06125	2.11291	0.0407179	Mfsd12
4	2	1.6293	2.11291	0.0425989	Mfsd12
4.80672	1.70828	0.973545	0.653435	0.184508	4930404N11Rik
11.9269	10.998	1.02408	0.653435	0.145763	4930404N11Rik
4	2	1.04978	0.653435	0.0501876	4930404N11Rik
17.7284	8.02478	0.972772	5.38777	0.0530947	Fzr1
6.74129	4.09181	1.03283	5.38777	0.0388624	Fzr1
4.48499	1.75754	1.05282	5.38777	0.025891	Fzr1
23.0011	12.1033	0.972102	14.9134	0.096524	Dohh
10.8231	2.74874	1.03668	14.9134	0.026341	Dohh
4.88246	0.655852	0.9722	14.9134	0.00146977	Dohh
6.09054	3.22281	0.916561	1.04594	0.696569	Smim24
4	4	0.287537	1.04594	0.680904	Smim24
21.8798	15.3798	1.05619	1.04594	0.102872	Smim24
4	4	1.15416	1.04594	0.0528303	Smim24
22.3204	15.1294	0.951848	43.3278	0.295076	Nfic
4	2	0.330762	43.3278	0.04624	Nfic
4	2.49571e-17	1.07736	43.3278	0.00359888	Nfic
8.59276	5.51381	1.04654	43.3278	0.00237974	Nfic
8.13781	5.87565	0.978496	16.7627	0.0557749	Ncln
11.544	1.49451	0.92819	16.7627	0.0960762	Ncln
22.1028	7.72874	0.904485	0.17893	0.627091	S1pr4
5.8746	1.7124	1.06416	0.17893	0.344344	S1pr4
4	2	1.16599	0.17893	0.00244903	S1pr4
25.7875	12.2447	1.0061	17.5135	0.0857636	Gna11
12.0966	11.5292	1.03863	17.5135	0.0281774	Gna11
6.029	2.08408	1.07124	17.5135	0.00808004	Gna11
5.28297	2.87723	0.762318	371.6	0.442471	Aes
16.3413	16.1022	0.967999	371.6	0.0453334	Aes
7.21149	6.22424	0.678369	371.6	0.333432	Aes
7.48069	2.88258	1.0092	4.62449	0.150606	Tle2
10.5397	5.88207	0.993287	4.62449	0.0681083	Tle2
26.5276	22.1768	0.918002	4.62449	0.219448	Tle2
23.4116	1.52455	1.00078	0.630138	0.221416	Tle6
4.78924	0.641052	1.08374	0.630138	0.099683	Tle6
7.67056	2.5367	1.06259	0.630138	0.0121694	Tle6
22.1886	4.76834	0.973016	0.29785	0.306676	BC025920
9.66694	7.77614	0.9517	0.29785	0.300673	BC025920
4.39112	0.702813	0.923458	0.29785	0.289559	BC025920
18.3855	5.80259	1.0605	1.87203	0.0315383	Sirt6
11.1689	4.32734	1.16084	1.87203	0.00701493	Sirt6
4.64015	0.431173	1.11498	1.87203	0.000997341	Sirt6
6.3449	3.84306	0.975369	1.08831	0.147943	Ankrd24
17.0616	0.899933	1.02891	1.08831	0.0157507	Ankrd24
9.75674	2.34683	1.09682	1.08831	0.0130758	Ankrd24
14.0945	7.82233	1.00074	0.270148	0.0943774	Gm10778
7.08105	6.67551	0.979877	0.270148	0.0908541	Gm10778
12.7287	2.76127	0.737548	0.270148	0.705487	Gm10778
20.2289	6.23453	0.90648	0.635782	0.478436	Zfp433
5.44215	3.53581	0.803261	0.635782	0.424343	Zfp433
4	2	0.747615	0.635782	0.259865	Zfp433
4	4	0.0187823	0.635782	0.725511	Zfp433
10.1738	7.66115	0.98875	0.134645	0.124244	Zfp781
5.07134	3.12037	0.840339	0.134645	0.555299	Zfp781
17.4767	3.6902	1.00075	0.161537	0.0741569	Gm10778
6.13934	6.07147	0.901701	0.161537	0.0297394	Gm10778
9.09173	3.29995	1.17934	0.161537	0.0121991	Gm10778
4	2	1.00112	0.667502	0.0241887	Zfp433
5.2816	3.38051	0.99046	0.667502	0.0723044	Zfp433
18.9666	6.70209	0.887848	0.667502	0.455827	Zfp433
10.9865	5.4851	0.99601	0.13879	0.07258	Zfp781
4.97683	3.41673	0.961575	0.13879	0.189253	Zfp781
7.68093	1.16542	0.912397	0.13879	0.248578	Zfp781
4.32435	0.345642	0.977908	0.776543	0.0990911	Zfp873
8.62225	2.3556	0.679533	0.776543	0.524627	Zfp873
19.906	10.6472	1.02971	0.776543	0.0386643	Zfp873
20.1458	4.75705	0.930655	0.617867	0.433434	AU041133
8.71932	8.29688	0.710364	0.617867	0.338653	AU041133
5.34456	3.1132	1.0347	0.617867	0.0183329	AU041133
23.4586	5.64133	0.89648	1.19984	0.547012	Zfp938
8.83916	0.808889	0.928403	1.19984	0.163064	Zfp938
4	2	0.79889	1.19984	0.0085825	Zfp938
11.7654	5.0922	0.958979	9.1519	0.100222	1190007I07Rik
23.7577	5.82246	0.925139	9.1519	0.127909	1190007I07Rik
4.21806	2.50762	0.859636	9.1519	0.0128409	1190007I07Rik
5.77449	3.96503	0.914592	2.28785	0.322749	Tdg
26.1019	13.9196	0.98286	2.28785	0.0625441	Tdg
4.2842	1.99409	1.47268	2.28785	0.0293153	Tdg
5.72931	0.563404	1.00287	2.10325	0.111776	Gm9855
4	2	0.833608	2.10325	0.248456	Gm9855
7.93424	6.77582	0.867275	2.10325	0.272805	Gm9855
11.7266	10.1455	0.964502	2.65763	0.0843397	Hcfc2
7.31334	3.98399	0.865758	2.65763	0.109128	Hcfc2
4	2.8616e-15	1.06009	2.65763	5.12431e-05	Hcfc2
25.572	1.26934	0.966134	6.66407	0.130989	Nfyb
11.6043	3.94876	0.952282	6.66407	0.0942704	Nfyb
4	2	0.74929	6.66407	0.112005	Nfyb
4	2	1.38501	6.66407	0.0454013	Nfyb
7.56679	1.48164	0.984614	30.7189	0.0472858	Txnrd1
23.6789	21.7043	0.976263	30.7189	0.0603672	Txnrd1
4	2	0.913972	30.7189	0.0337191	Txnrd1
4	4	0.807366	30.7189	0.014298	Txnrd1
31.7313	27.2731	0.784909	0.204302	1.15723	Eid3
5.3457	3.71774	1.04969	0.204302	0.191797	Eid3
11.2582	7.03768	1.15206	0.204302	0.0247661	Eid3
5.99472	3.97765	1.28892	0.0658822	0.181671	Chst11
14.1787	11.5933	1.38709	0.0658822	0.111293	Chst11
4	2	1.41494	0.0658822	0.0131254	Chst11
24.3199	20.9526	0.949132	4.43866	1.13433	Slc41a2
5.8474	4.47562	0.977201	4.43866	0.305593	Slc41a2
7.8698	0.00762682	0.963188	4.43866	0.446657	Slc41a2
12.8129	11.6255	1.05477	4.15825	0.0464536	D10Wsu102e
5.03636	4.36041	1.04678	4.15825	0.00640185	D10Wsu102e
4	2	1.06803	4.15825	0.0027021	D10Wsu102e
23.0935	22.1929	0.954359	3.61595	0.092667	A230046K03Rik
4.99267	0.0264661	0.87022	3.61595	0.18024	A230046K03Rik
8.3842	3.20317	1.09143	3.61595	0.00823643	A230046K03Rik
22.5263	6.1995	0.992423	4.51608	0.214877	Appl2
9.6044	0.608032	1.02697	4.51608	0.0314498	Appl2
5.17689	4.34511	1.09447	4.51608	0.0503903	Appl2
27.4181	23.4402	1.04212	0.900662	0.159137	Nuak1
5.41924	0.214742	1.07362	0.900662	0.111904	Nuak1
8.15321	6.96724	1.06051	0.900662	0.0226985	Nuak1
4.35309	1.7341	1.21953	0.979109	0.0978972	Ckap4
26.5969	23.1671	1.19914	0.979109	0.0280289	Ckap4
6.29245	0.883752	1.25425	0.979109	0.00418234	Ckap4
24.2811	4.07927	0.979149	4.86296	0.511057	Tcp11l2
11.8979	5.85334	1.03802	4.86296	0.105532	Tcp11l2
5.34638	2.07702	1.06782	4.86296	0.0028214	Tcp11l2
11.246	9.80144	0.994882	2.9813	0.0469319	Polr3b
22.8955	4.44782	0.956702	2.9813	0.0634243	Polr3b
8.42397	3.63538	1.07054	2.9813	0.0297034	Polr3b
23.3191	3.78313	1.01273	1.50652	0.565872	Rfx4
8.14629	3.11024	1.03428	1.50652	0.243832	Rfx4
11.5781	5.46803	1.05092	1.50652	0.240689	Rfx4
6.22871	4.27144	0.995437	2.00371	0.0649362	Ric8b
4.34629	2.60217	0.995363	2.00371	0.0238733	Ric8b
24.3643	22.2853	0.893014	2.00371	0.322187	Ric8b
24.9497	23.8517	1.0006	1.5075	0.169921	Tmem263
6.64958	3.54554	0.985859	1.5075	0.0629118	Tmem263
4.89718	2.10598	1.07571	1.5075	0.034031	Tmem263
23.6335	7.43213	0.987687	1.42754	0.632399	Mterf2
11.8418	6.80522	1.00928	1.42754	0.0949608	Mterf2
4.75482	2.93492	1.03519	1.42754	0.0929534	Mterf2
23.6598	18.6107	0.986835	6.42589	0.941887	Cry1
4	4	0.868929	6.42589	0.095727	Cry1
6.75637	6.49219	0.892484	6.42589	0.146259	Cry1
4	2	0.16388	6.42589	0.166707	Cry1
7.43706	6.24708	0.988616	0.191976	0.142732	Btbd11
17.6942	8.23724	0.990816	0.191976	0.114995	Btbd11
5.0302	2.88761	0.879756	0.191976	0.453563	Btbd11
17.2238	4.99204	0.914136	4.61217	0.0971066	Pwp1
9.56884	7.83408	1.0973	4.61217	0.00516174	Pwp1
4	2	2.03669	4.61217	0.00936497	Pwp1
11.1939	9.57469	0.94027	1.98574	0.125808	Prdm4
4.94666	0.350746	1.03747	1.98574	0.0174045	Prdm4
19.953	6.30159	1.11569	1.98574	0.0169797	Prdm4
4	2	0.996525	22.0084	0.00672777	Rtcb
23.5867	8.0778	0.943842	22.0084	0.122956	Rtcb
7.55497	0.0238717	1.07503	22.0084	0.00338897	Rtcb
4	2	2.1706	22.0084	0.00104067	Rtcb
21.8271	9.14088	0.927288	6.06877	0.171072	Fbxo7
4	2	1.06058	6.06877	0.0258116	Fbxo7
8.30539	1.39208	0.936579	6.06877	0.0540125	Fbxo7
4	9.20669e-17	0.918362	6.06877	0.00591363	Fbxo7
23.0429	6.0803	1.00133	0.361576	0.228876	Syn3
4	4	0.979657	0.361576	0.0638839	Syn3
7.80948	4.97565	1.08192	0.361576	0.0360627	Syn3
4	2	0.288796	0.361576	0.0724075	Syn3
20.9273	13.3856	1.06949	5.32112	0.180316	Timp3
5.1063	1.46036	1.21687	5.32112	0.0278748	Timp3
6.57317	6.08396	1.19666	5.32112	0.0161993	Timp3
22.4598	5.83687	1.02279	0.653065	0.323421	1810014B01Rik
7.94264	1.19019	1.04183	0.653065	0.00730611	1810014B01Rik
5.32055	1.70166	1.07329	0.653065	0.00867199	1810014B01Rik
22.0325	19.3235	1.00906	247.012	0.224624	Hsp90b1
5.91034	5.38414	1.0088	247.012	0.156121	Hsp90b1
11.3319	2.58128	0.99163	247.012	0.0762845	Hsp90b1
7.11186	6.68668	0.993345	0.831228	0.145584	Ttc41
22.9581	19.5358	0.92138	0.831228	0.37261	Ttc41
10.8967	2.7933	1.03526	0.831228	0.042029	Ttc41
12.399	8.32739	0.984853	2.99295	0.0865922	Nt5dc3
19.361	15.207	0.949291	2.99295	0.229812	Nt5dc3
5.45766	5.03571	0.968645	2.99295	0.104825	Nt5dc3
8.37883	3.44947	0.996528	3.33985	0.070537	Stab2
5.4451	3.147	1.0221	3.33985	0.0533721	Stab2
22.498	3.63104	1.08199	3.33985	0.0835584	Stab2
23.0976	14.0272	1.00095	554.446	0.215467	Pah
12.1747	4.68986	0.969914	554.446	0.0506656	Pah
4.79874	0.665128	0.901922	554.446	0.150272	Pah
26.5237	15.3474	0.988605	139.997	0.115409	Igf1
13.0539	3.44007	0.987092	139.997	0.041259	Igf1
7.21072	4.79507	1.05513	139.997	0.00111895	Igf1
5.88241	0.820271	0.97075	2.08869	0.107042	Nup37
24.4779	5.60375	0.91032	2.08869	0.320086	Nup37
11.2654	6.57484	1.01865	2.08869	0.0258202	Nup37
22.2365	6.50852	0.930651	11.5693	0.264329	Ccdc53
4.53871	1.24299	0.982743	11.5693	0.0482251	Ccdc53
5.30165	2.12787	1.02415	11.5693	0.0300663	Ccdc53
4	2	0.834192	0.363452	0.126203	Dram1
25.5704	15.1216	2.2127	0.363452	0.179763	Dram1
4	2	2.07707	0.363452	0.0704412	Dram1
6.57275	3.63973	1.88995	0.363452	0.0259532	Dram1
21.9803	9.06031	0.854936	2.40676	0.303211	Gnptab
9.82346	0.813982	1.08718	2.40676	0.09731	Gnptab
5.70051	5.12019	1.13569	2.40676	0.0487392	Gnptab
7.91276	4.02856	0.97286	71.4573	0.0814697	Chpt1
5.40306	3.03383	0.931006	71.4573	0.100711	Chpt1
24.5744	10.35	1.04633	71.4573	0.036867	Chpt1
17.2472	9.81743	0.596346	3.80306	2.752e-06	Mybpc1
5.27548	2.82514	0.663014	3.80306	1.5873e-06	Mybpc1
7.52171	1.24158	0.609029	3.80306	1.58211e-06	Mybpc1
4.05031	2.96943	0.818608	0.67244	2.10393	Spic
10.1756	8.34169	0.922701	0.67244	0.288288	Spic
18.7224	9.46482	1.1001	0.67244	0.141599	Spic
24.9755	14.3348	1.02413	36.886	0.0556201	Arl1
10.1802	0.126062	0.963412	36.886	0.0542321	Arl1
6.61628	3.80549	1.02553	36.886	0.0077421	Arl1
23.5452	10.2623	0.966198	2.1977	0.187125	Utp20
11.6358	9.93079	0.95448	2.1977	0.113773	Utp20
6.37008	3.4838	1.30592	2.1977	0.0617876	Utp20
10.2811	3.60465	1.06147	0.00763225	0.135216	Slc5a8
4.59913	0.81182	1.13303	0.00763225	0.198137	Slc5a8
4	6.27907e-18	1.28736	0.00763225	0.0406359	Slc5a8
34.9219	13.3549	0.890211	0.419663	0.551111	Gas2l3
4.4405	3.37688	1.03839	0.419663	0.0499366	Gas2l3
12.3507	11.1042	1.14049	0.419663	0.00789162	Gas2l3
5.52109	2.39683	0.995075	57.515	0.0508713	Nr1h4
35.9353	10.3742	0.852611	57.515	0.477027	Nr1h4
10.3338	6.84863	1.03615	57.515	0.0366279	Nr1h4
8.19612	2.81907	0.945174	5.91502	0.468447	Slc17a8
11.6425	6.12297	1.026	5.91502	0.198214	Slc17a8
4	3.6562e-17	1.14351	5.91502	0.0592563	Slc17a8
8.03122	2.69628	1.02041	7.89549	0.0456599	Scyl2
17.1933	10.7035	1.13352	7.89549	0.0406195	Scyl2
4.83107	0.442488	1.02796	7.89549	0.00818804	Scyl2
6.54273	3.68652	0.985514	0.264323	0.188181	1500026H17Rik
26.0507	8.1683	0.952501	0.264323	0.215873	1500026H17Rik
6.50391	1.40137	0.677812	0.264323	0.75134	1500026H17Rik
6.48071	0.528819	0.968553	3.03832	0.082182	Actr6
4.49854	0.444471	1.03862	3.03832	0.0454735	Actr6
30.3668	13.0723	1.04555	3.03832	0.0342649	Actr6
8.16397	3.59011	1.02822	8.80996	0.0364107	Uhrf1bp1l
4	2	0.979667	8.80996	0.00903023	Uhrf1bp1l
12.575	3.31208	1.02452	8.80996	0.0141691	Uhrf1bp1l
4.47333	2.79863	1.10837	0.346926	0.149845	Apaf1
22.6301	3.89128	1.07016	0.346926	0.0742932	Apaf1
6.42108	6.31466	1.10015	0.346926	0.0357639	Apaf1
23.5135	4.89752	0.975574	1.09003	0.254435	Ikbip
5.0366	2.81365	1.01015	1.09003	0.0945847	Ikbip
7.13215	0.73442	1.06709	1.09003	0.0226713	Ikbip
5.89468	2.05286	1.1747	111.426	0.0226281	Slc25a3
11.8395	10.3785	1.11476	111.426	0.00874988	Slc25a3
7.57452	1.43875	1.26363	111.426	0.00532653	Slc25a3
22.5286	21.4023	1.00669	8.43199	0.0913494	Tmpo
6.86741	4.98711	0.977089	8.43199	0.0283246	Tmpo
10.7385	10.6643	1.09163	8.43199	0.07521	Tmpo
23.3643	4.62973	1.0168	3.03537	0.0840962	Nedd1
4	4	0.923339	3.03537	0.0235587	Nedd1
10.8911	6.91296	1.03535	3.03537	0.0196002	Nedd1
4	4	1.51475	3.03537	0.00321979	Nedd1
8.28647	5.10285	0.992051	3.69941	0.0246661	Cdk17
26.9321	0.0611067	0.939165	3.69941	0.166559	Cdk17
6.1721	4.50378	0.968732	3.69941	0.075244	Cdk17
8.22763	3.79971	0.972444	1.78025	0.0895701	Elk3
5.38127	1.64497	1.14415	1.78025	0.136976	Elk3
16.3467	7.51857	0.977969	12.5355	0.0527273	Lta4h
5.14873	3.23066	0.909221	12.5355	0.0892044	Lta4h
7.16321	1.50253	1.19756	12.5355	0.00457188	Lta4h
5.58114	3.66312	0.897714	85.7876	0.324481	Hal
22.6126	2.37028	1.0571	85.7876	0.132995	Hal
11.8282	4.31289	1.03237	85.7876	0.0580746	Hal
22.3358	4.25532	1.00883	60.2937	0.252797	Amdhd1
5.5987	3.69667	1.04415	60.2937	0.0983543	Amdhd1
12.4945	3.54821	1.02481	60.2937	0.0341308	Amdhd1
28.3928	18.9773	1.02695	9.72233	0.0766958	Snrpf
11.8648	2.17334	0.912499	9.72233	0.164052	Snrpf
7.76898	6.10508	0.868131	9.72233	0.203143	Snrpf
5.44755	3.5038	0.995939	1.94431	0.0401279	Ntn4
8.77317	0.15376	0.96555	1.94431	0.029284	Ntn4
4	3.11047e-17	0.690194	1.94431	0.0199822	Ntn4
4.59406	0.305687	0.998597	8.49777	0.0221474	Metap2
33.0743	5.2214	1.05514	8.49777	0.0289659	Metap2
10.8203	10.7481	1.18937	8.49777	0.00397702	Metap2
21.3419	1.20846	0.959135	0.614473	0.185323	Vezt
4.85562	1.72249	0.879704	0.614473	0.127246	Vezt
8.67896	3.80795	1.04211	0.614473	0.020485	Vezt
4	2	0.73176	5.18277	0.158287	Fgd6
8.24485	4.57054	1.03481	5.18277	0.0398757	Fgd6
27.1005	21.1462	1.05944	5.18277	0.0164231	Fgd6
4.99283	1.74939	0.993738	3.16286	0.0461764	Nr2c1
23.6555	0.508561	1.03593	3.16286	0.0265864	Nr2c1
10.927	5.33747	1.04901	3.16286	0.0151239	Nr2c1
4.70169	3.89191	1.00338	93.8782	0.0304425	Ndufa12
20.6533	13.524	0.973661	93.8782	0.088257	Ndufa12
7.25519	3.33058	0.793476	93.8782	0.0358283	Ndufa12
8.9895	1.30139	0.955829	2.75125	0.11951	Tmcc3
5.65865	4.83061	0.945221	2.75125	0.120064	Tmcc3
4	3.32821e-16	0.855888	2.75125	0.000304203	Tmcc3
10.1268	8.77395	0.989429	0.51902	0.219373	Cep83os
21.6398	7.13716	0.952449	0.51902	0.726983	Cep83os
6.43067	2.79143	1.74933	0.51902	0.0558453	Cep83os
25.8696	1.072	0.974716	1.72967	0.11111	Cep83
8.59248	0.514649	1.07124	1.72967	0.00819581	Cep83
5.67445	2.36299	1.41307	1.72967	0.0122834	Cep83
8.36901	3.53477	0.984204	1.33352	0.133557	Plxnc1
6.02654	2.24058	0.972048	1.33352	0.213339	Plxnc1
21.039	4.76334	1.24405	1.33352	0.119584	Plxnc1
20.2912	6.03411	0.953462	6.93	0.228075	Cradd
11.1727	6.02053	1.01481	6.93	0.0707341	Cradd
5.41853	2.59729	1.08157	6.93	0.164103	Cradd
5.90862	0.476624	1.14288	7.54938	0.143565	Socs2
4.93292	4.4737	1.13302	7.54938	0.0511547	Socs2
11.6282	2.08129	1.11216	7.54938	0.00575522	Socs2
19.9235	15.499	0.928966	52.2595	0.212889	Mrpl42
8.28623	6.48395	1.01326	52.2595	0.0330169	Mrpl42
5.0384	2.29476	0.852538	52.2595	0.119414	Mrpl42
5.27408	2.10859	1.0028	7.42795	0.0136734	Ube2n
11.1823	2.751	0.977102	7.42795	0.0804628	Ube2n
22.5222	17.1258	0.938179	7.42795	0.0852053	Ube2n
24.5533	5.30319	0.946666	40.5037	0.173719	Nudt4
10.3459	7.90182	0.95973	40.5037	0.048981	Nudt4
5.43401	4.50563	1.09367	40.5037	0.0208342	Nudt4
8.81439	1.76838	0.934434	4.22116	0.0794168	Eea1
4	1.3281e-17	0.860224	4.22116	0.0646416	Eea1
14.3394	3.63712	0.894302	4.22116	0.0672555	Eea1
4	1.0158e-15	1.05008	4.22116	5.8091e-05	Eea1
23.9374	22.2735	1.00519	6.20434	0.253584	Btg1
12.0677	4.06856	1.00764	6.20434	0.136895	Btg1
5.88429	2.73074	0.990874	6.20434	0.132409	Btg1
9.31175	5.3162	1.03227	76.6236	0.0588063	Dcn
17.9738	16.3491	1.04197	76.6236	0.0485257	Dcn
5.12815	3.16907	1.07727	76.6236	0.0345387	Dcn
5.22308	0.48356	1.00353	4.32944	0.157341	Lum
6.86409	4.2298	1.01775	4.32944	0.0788106	Lum
10.3701	3.97891	1.05334	4.32944	0.026874	Lum
6.01881	3.21382	0.894658	3.43462	0.200335	Atp2b1
18.6536	17.2139	1.07238	3.43462	0.0860959	Atp2b1
6.77026	6.64861	0.678905	3.43462	0.257827	Atp2b1
18.0692	6.61134	1.00297	3.06553	0.16201	Poc1b
8.22407	2.61146	1.01234	3.06553	0.0662756	Poc1b
4.69037	4.03545	1.04128	3.06553	0.0128903	Poc1b
8.68261	2.25007	0.928026	4.25846	0.204194	Galnt4
10.9905	6.24245	0.947777	4.25846	0.113833	Galnt4
4.93551	4.0188	0.932486	4.25846	0.0426441	Galnt4
4	4.97002e-18	0.630933	15.7958	0.830545	Dusp6
4	2	0.683745	15.7958	0.701471	Dusp6
6.66675	0.0551684	1.01965	15.7958	0.0371594	Dusp6
22.1647	9.14709	1.03833	15.7958	0.0328948	Dusp6
9.15951	1.11214	1.07246	0.687469	0.266384	Kitl
12.379	7.71348	1.2461	0.687469	0.0391374	Kitl
5.46928	0.712224	1.20605	0.687469	0.0204126	Kitl
19.4551	16.8461	0.933358	1.47743	0.128013	Tmtc3
4	4	1.03936	1.47743	0.0134746	Tmtc3
8.03629	4.39267	1.05546	1.47743	0.0131529	Tmtc3
4	2	0.308407	1.47743	0.0187833	Tmtc3
26.1509	21.4701	0.998231	0.3302	0.0987081	Cep290
7.88891	0.288182	1.00662	0.3302	0.024533	Cep290
4.19136	0.265975	1.09409	0.3302	0.03133	Cep290
22.4488	18.699	0.96269	1.40029	0.254575	4930430F08Rik
6.44652	5.44243	0.959637	1.40029	0.0769654	4930430F08Rik
4	4	0.968651	1.40029	0.0276895	4930430F08Rik
4	2	0.304249	1.40029	0.366232	4930430F08Rik
5.67526	1.28778	0.999257	1.47175	0.0649185	Tmtc2
23.8282	10.1601	1.00774	1.47175	0.342523	Tmtc2
9.27172	1.61099	0.98289	1.47175	0.0992452	Tmtc2
23.4067	2.93052	0.994289	0.849228	0.158853	Mettl25
5.05543	3.99945	1.05286	0.849228	0.0258071	Mettl25
9.85182	6.03005	1.19989	0.849228	0.0425007	Mettl25
11.0292	3.02178	1.04547	7.34102	0.051358	Ccdc59
5.27812	2.16808	1.03269	7.34102	0.0140703	Ccdc59
4	2	1.16266	7.34102	0.00194816	Ccdc59
20.2993	12.721	1.00944	6.8344	0.0749582	Acss3
5.75434	3.32309	0.78059	6.8344	1.01569	Acss3
10.0711	9.02667	0.969648	6.8344	0.136798	Acss3
24.489	12.1888	1.01797	5.38377	0.101601	Lin7a
9.55826	4.01786	1.01431	5.38377	0.0349636	Lin7a
4.77334	0.43468	0.977776	5.38377	0.0319826	Lin7a
30.3826	25.786	0.956358	4.56223	0.126648	Ppp1r12a
4.2514	0.136256	0.978277	4.56223	0.0375424	Ppp1r12a
8.16548	1.13247	1.10317	4.56223	0.0253905	Ppp1r12a
7.67575	0.0140367	0.941035	4.7799	0.269359	Pawr
11.2629	1.93175	1.03636	4.7799	0.146219	Pawr
4.7039	0.441959	0.961806	4.7799	0.125157	Pawr
22.8705	8.0211	1.00755	1.78214	0.505621	Syt1
4	2	1.02712	1.78214	0.0929603	Syt1
11.2583	9.66886	1.06222	1.78214	0.0352555	Syt1
5.1264	3.37997	0.948295	0.0571245	0.465494	E2f7
18.5051	16.8271	1.15638	0.0571245	0.298202	E2f7
8.38307	5.34752	1.18674	0.0571245	0.00540052	E2f7
24.4022	14.9831	1.01559	29.161	0.0952419	Csrp2
4.69891	0.665148	0.978363	29.161	0.104616	Csrp2
7.23941	0.19784	0.961771	29.161	0.0504635	Csrp2
29.9458	1.68148	1.02576	1.94978	0.0424224	Zdhhc17
6.22786	1.69581	1.01218	1.94978	0.0139245	Zdhhc17
4.45508	3.08119	0.713008	1.94978	0.0309389	Zdhhc17
5.72284	3.52951	1.01166	5.86779	0.0626071	Osbpl8
4	2	0.925956	5.86779	0.0388298	Osbpl8
9.8048	1.74444	1.09582	5.86779	0.0236032	Osbpl8
10.746	5.97014	0.955714	1.48363	0.126265	Bbs10
6.15862	4.26592	1.01705	1.48363	0.0307197	Bbs10
19.9904	17.0531	0.983082	21.6108	0.142203	Nap1l1
6.90813	2.03713	1.01614	21.6108	0.0399133	Nap1l1
4.22161	3.18337	0.961631	21.6108	0.0830877	Nap1l1
9.96106	1.85378	1.05969	53.866	0.421943	Phlda1
5.30831	1.69436	1.10455	53.866	0.213109	Phlda1
13.8866	9.34116	1.47244	53.866	0.0437201	Phlda1
20.0357	12.689	0.994864	3.15316	0.0290592	Krr1
7.31271	7.16275	1.01548	3.15316	0.0270029	Krr1
4	2	1.28206	3.15316	0.00476426	Krr1
4	4	0.553175	3.15316	3.15174e-05	Krr1
21.5599	6.33857	1.0063	0.689596	0.12347	Glipr1
6.70871	3.13359	0.920482	0.689596	0.299703	Glipr1
4	2	1.04837	0.689596	0.0466955	Glipr1
4	5.12208e-17	0.987464	22.5175	0.00822872	Atxn7l3b
4.74439	1.15866	0.9434	22.5175	0.0530921	Atxn7l3b
7.23694	3.00526	1.03904	22.5175	0.0204368	Atxn7l3b
9.81279	7.69715	0.995612	0.222107	0.0761318	Trhde
7.41858	3.96086	0.932769	0.222107	0.4122	Trhde
4	8.72945e-17	0.858267	0.222107	0.113815	Trhde
11.2014	8.94502	1.00194	6.6906	0.0688639	Tbc1d15
26.844	4.20597	1.01009	6.6906	0.130015	Tbc1d15
8.06245	0.204326	1.07824	6.6906	0.0148008	Tbc1d15
23.6097	21.5457	0.838713	11.6099	0.362479	Rab21
4	1.08894e-16	0.822386	11.6099	0.0169056	Rab21
6.22728	4.06953	0.734167	11.6099	0.0409781	Rab21
6.34894	2.33726	1.00525	34.8571	0.0204061	Tmem19
20.9354	2.62442	0.960393	34.8571	0.149804	Tmem19
5.20352	4.77455	0.954105	34.8571	0.0235066	Tmem19
14.3331	13.5314	0.589056	1.93929	3.03833	Thap2
9.37195	5.69666	0.879794	1.93929	0.407897	Thap2
4	2.70553e-17	0.915184	1.93929	0.122388	Thap2
21.9295	20.0489	0.902478	5.31115	0.222012	Zfc3h1
4	4	0.863192	5.31115	0.0547004	Zfc3h1
7.16166	5.32762	1.15841	5.31115	0.0151978	Zfc3h1
24.8062	24.3338	0.974764	2.49833	0.277738	Lgr5
4.46363	0.684933	0.840575	2.49833	0.66277	Lgr5
8.33347	4.64468	1.1184	2.49833	0.0798219	Lgr5
5.94698	2.36276	1.19081	0.945041	0.194842	Tspan8
4	2	1.10672	0.945041	0.0180579	Tspan8
11.7127	4.51084	1.41548	0.945041	0.0492797	Tspan8
5.67233	2.7646	1.00325	4.58949	0.116235	Ptprb
9.07542	2.44898	0.985113	4.58949	0.129405	Ptprb
4	4	0.984505	4.58949	0.0273042	Ptprb
11.8544	2.89154	1.06134	7.98338	0.0629746	Cnot2
7.54874	1.36497	1.11866	7.98338	0.0372255	Cnot2
24.2788	23.589	1.59713	7.98338	0.00847434	Cnot2
24.3964	10.9228	1.03113	5.81979	0.0780514	Rab3ip
4.6771	0.175678	1.03909	5.81979	0.0265126	Rab3ip
11.5942	10.4903	1.0548	5.81979	0.0200192	Rab3ip
20.4454	6.74775	1.00378	0.381818	0.0953253	4933412E12Rik
6.19903	5.84275	1.01221	0.381818	0.0688125	4933412E12Rik
4	2	1.19552	0.381818	0.234464	4933412E12Rik
4	2	1.04571	0.381818	0.00149432	4933412E12Rik
5.99475	0.215353	1.05016	0.00425051	1.62514	D630029K05Rik
7.19152	7.16819	1.19497	0.00425051	0.311684	D630029K05Rik
4	4	1.12108	0.00425051	0.000467416	D630029K05Rik
11.8263	4.75804	0.98871	43.0982	0.0475794	Cct2
4	4	0.302908	43.0982	0.124073	Cct2
5.86308	1.18957	1.05315	43.0982	0.00736796	Cct2
4	3.04817e-19	1.06271	3.24728	0.0367707	Frs2
6.38449	5.44797	1.10484	3.24728	0.0402535	Frs2
4	2	1.26662	3.24728	0.0121201	Frs2
20.3203	6.00354	0.930666	10.0078	0.185777	Yeats4
7.42498	0.518765	0.861519	10.0078	0.172006	Yeats4
6.39885	1.03571	1.10476	10.0078	0.00732875	Yeats4
14.528	8.3428	1.0884	37.3695	0.0505778	Lyz2
4.7723	3.28456	1.31913	37.3695	0.0629035	Lyz2
7.31128	1.84647	1.22454	37.3695	0.0239449	Lyz2
21.0005	15.6673	0.941001	3.72899	0.312877	Cpsf6
11.7455	3.35838	0.980549	3.72899	0.100554	Cpsf6
7.40187	2.24152	1.48776	3.72899	0.052348	Cpsf6
5.3971	0.195483	0.991349	0.561692	0.199869	Cpm
4	4	0.554361	0.561692	0.117749	Cpm
7.74727	1.47967	1.07083	0.561692	0.0308001	Cpm
11.5984	2.09879	0.820081	8.3558	0.226925	Mdm2
4	2.64372e-17	1.0302	8.3558	0.0139671	Mdm2
27.2009	24.799	1.17827	8.3558	0.01796	Mdm2
4	8.46257e-18	2.1692	8.3558	0.00687429	Mdm2
12.1971	10.258	1.01002	6.0243	0.0723683	Slc35e3
20.8983	19.9075	0.963871	6.0243	0.183504	Slc35e3
4.90024	0.488624	0.829239	6.0243	0.237119	Slc35e3
9.26652	0.797157	1.00849	1.05935	0.0378586	Nup107
21.5147	5.87623	0.926037	1.05935	0.17011	Nup107
5.83325	4.43143	0.895312	1.05935	0.118982	Nup107
13.922	1.45005	0.999675	16.6695	0.00486445	Rap1b
4.3736	2.46784	0.994886	16.6695	0.0298852	Rap1b
7.95418	2.99396	1.08816	16.6695	0.00286212	Rap1b
11.8078	1.97535	1.05039	0.33825	0.0598589	Mdm1
4.08443	0.309194	1.09745	0.33825	0.113294	Mdm1
5.20545	1.42717	1.0555	0.33825	0.0626503	Mdm1
22.7019	4.00898	1.03571	9.55438	0.123397	Dyrk2
8.99665	1.95231	1.03291	9.55438	0.0440382	Dyrk2
5.84145	5.09998	1.13081	9.55438	0.0402088	Dyrk2
8.69849	2.08763	0.967355	6.34736	0.124073	Cand1
17.1774	6.26152	0.897379	6.34736	0.143663	Cand1
4.89809	0.184061	0.861246	6.34736	0.128415	Cand1
10.1414	5.4519	0.995548	2.77487	0.0698584	Helb
11.6544	9.81751	1.10708	2.77487	0.0308729	Helb
4	2	1.04721	2.77487	0.00367794	Helb
23.1133	4.46515	1.07386	0.585283	0.18165	Irak3
4.52717	3.0241	1.04452	0.585283	0.0656726	Irak3
5.99591	0.332332	1.06536	0.585283	0.0445823	Irak3
6.11626	2.59863	0.856773	41.0129	0.171568	Tmbim4
12.0018	7.85574	0.830617	41.0129	0.184205	Tmbim4
4	2	1.08214	41.0129	1.36925e-05	Tmbim4
26.6804	12.2385	0.978454	18.059	0.131691	Llph
10.9718	0.798526	0.970338	18.059	0.0542134	Llph
5.36976	2.31747	0.96396	18.059	0.0490219	Llph
27.4514	27.315	1.01321	4.07974	0.116743	Msrb3
7.21204	0.574791	1.01747	4.07974	0.0717604	Msrb3
4.34347	0.335411	0.957158	4.07974	0.0109585	Msrb3
13.4351	7.49981	0.992902	1.97658	0.083216	Lemd3
9.01939	1.74269	0.288533	1.97658	0.777734	Lemd3
4.33743	2.58658	1.08795	1.97658	5.51805e-07	Lemd3
24.0355	6.00169	0.98875	0.960925	0.204173	Tbc1d30
11.9508	9.99665	1.18416	0.960925	0.123346	Tbc1d30
6.16129	0.474065	1.13824	0.960925	0.0830177	Tbc1d30
22.1467	10.5744	0.954427	35.7933	0.21799	Gns
8.53146	3.03461	1.01372	35.7933	0.0256524	Gns
4	2	1.02276	35.7933	0.018697	Gns
4	1.85926e-16	1.54688	35.7933	9.23086e-05	Gns
25.4989	6.30351	0.995951	18.568	0.205403	Rassf3
10.3794	10.0704	0.954886	18.568	0.101091	Rassf3
5.94721	0.197105	1.02206	18.568	0.0137741	Rassf3
20.9941	1.53172	1.04359	5.6228	0.0860435	Tbk1
8.6534	6.87597	1.11769	5.6228	0.0659556	Tbk1
5.99069	3.50867	1.40506	5.6228	0.00260185	Tbk1
23.8024	10.1097	0.974635	11.8839	0.188051	Xpot
4	0	0.98885	11.8839	0.0126364	Xpot
8.7492	1.83777	0.948615	11.8839	0.102106	Xpot
9.66786	9.0254	1.07079	1.99059	0.0146915	BC048403
6.25569	5.1377	1.11603	1.99059	0.020886	BC048403
18.0098	10.2897	1.12157	1.99059	0.000191941	BC048403
7.17883	5.41533	0.88903	0.137818	0.121487	Srgap1
4	2	0.77843	0.137818	0.0296541	Srgap1
18.0622	4.68295	1.24732	0.137818	0.0365069	Srgap1
4	1.24476e-17	0.931889	0.118471	0.35917	Gm9079
16.6497	6.00397	0.89602	0.118471	0.67186	Gm9079
7.04834	1.43331	1.03923	0.118471	0.118117	Gm9079
4	2	1.0515	0.118471	0.0588182	Gm9079
5.60813	2.15934	0.968026	6.98593	0.0587081	Tmem5
4	2	0.155428	6.98593	0.36542	Tmem5
8.21096	6.09155	1.06161	6.98593	0.00236375	Tmem5
23.5116	22.2317	0.989673	16.8863	0.762306	Avpr1a
5.8273	0.208246	1.00528	16.8863	0.133559	Avpr1a
4	2	0.968381	16.8863	0.0236801	Avpr1a
20.0821	6.01467	1.03177	0.656103	0.107814	Ppm1h
4.9618	0.5123	0.962562	0.656103	0.0618345	Ppm1h
11.4883	8.99709	1.13012	0.656103	0.0691098	Ppm1h
8.47565	2.26942	1.01716	5.62753	0.0302747	Mon2
5.16036	0.383468	0.911924	5.62753	0.0780332	Mon2
4	4	0.236655	5.62753	0.0273742	Mon2
4.2602	3.10201	0.891987	2.99472	0.0533075	Usp15
5.15689	3.05786	1.04999	2.99472	0.0163397	Usp15
16.099	13.804	1.11825	2.99472	0.0166319	Usp15
22.9478	12.7315	0.984673	12.4062	0.309072	Slc16a7
5.25586	3.05019	0.860626	12.4062	0.447472	Slc16a7
6.93249	5.56245	0.97558	12.4062	0.0363599	Slc16a7
23.7996	8.16545	0.878966	2.18714	0.308745	Lrig3
4.41406	0.564292	0.931639	2.18714	0.137025	Lrig3
7.75045	1.86644	0.74243	2.18714	0.147026	Lrig3
24.401	11.6363	0.965126	2.85628	0.323073	Xrcc6bp1
5.91603	1.60009	0.907073	2.85628	0.124419	Xrcc6bp1
11.7631	10.6899	1.04557	2.85628	0.0386383	Xrcc6bp1
25.2629	6.04686	0.976522	11.9279	0.212689	Ctdsp2
10.7174	7.24574	0.95378	11.9279	0.115574	Ctdsp2
5.66469	1.02548	1.07695	11.9279	0.00235738	Ctdsp2
4	2	0.983239	8.25009	0.0224086	Tsfm
16.6083	9.27995	0.887299	8.25009	0.267628	Tsfm
6.24909	2.59876	0.817595	8.25009	0.060442	Tsfm
17.6179	4.11821	1.00673	5.44973	0.0574409	Mettl1
5.9341	0.0410655	0.945242	5.44973	0.105042	Mettl1
10.9483	2.92649	1.12689	5.44973	0.00274456	Mettl1
4	1.52993e-18	0.997558	0.275842	0.0383314	43533
18.3972	2.76393	0.981112	0.275842	0.252917	43533
6.5193	6.16488	1.07558	0.275842	0.0645214	43533
7.85864	7.64398	1.05998	17.7504	0.0303774	Cdk4
14.947	10.5575	1.08697	17.7504	0.0252669	Cdk4
10.7151	7.96405	1.21808	17.7504	0.00216447	Cdk4
30.8113	16.212	1.01081	123.576	0.0517327	Tspan31
11.5564	3.32618	1.02558	123.576	0.0207075	Tspan31
5.73131	4.68605	1.02859	123.576	0.0197803	Tspan31
22.6899	12.5	0.994476	2.61557	0.371487	LOC100504703
5.34846	0.328672	1.0397	2.61557	0.0659762	LOC100504703
6.46697	3.44215	1.05022	2.61557	0.0331542	LOC100504703
6.07322	4.42252	1.01623	0.686675	0.20465	Agap2
12.0955	11.0049	1.03768	0.686675	0.184708	Agap2
7.77024	0.394632	1.0879	0.686675	0.0432361	Agap2
4	2	1.00577	39.0918	0.0184466	Os9
16.2949	13.4057	0.983496	39.0918	0.0790696	Os9
6.15071	4.14649	0.989382	39.0918	0.0416892	Os9
12.0354	4.61684	0.990522	34.8635	0.0602151	B4galnt1
5.70609	5.61688	1.02025	34.8635	0.0488796	B4galnt1
23.1418	9.76229	0.981726	1.14535	0.41841	Slc26a10
9.66373	0.732051	1.04067	1.14535	0.235832	Slc26a10
5.20328	3.55733	1.10458	1.14535	0.0824823	Slc26a10
6.00691	2.14791	1.17685	0.565578	0.0334245	Arhgef25
21.197	12.5216	1.1091	0.565578	0.0185587	Arhgef25
4	2	0.797878	0.565578	0.00438555	Arhgef25
4	2	1.4579	0.565578	0.00416178	Arhgef25
6.88262	3.30733	1.12202	2.35385	0.136075	Dtx3
9.30074	4.05862	1.15591	2.35385	0.094869	Dtx3
4	2	1.77658	2.35385	0.0150093	Dtx3
6.97045	3.54262	0.984656	0.155992	0.167717	F420014N23Rik
11.0064	7.33042	0.988447	0.155992	0.124913	F420014N23Rik
28.2006	2.17837	0.938606	0.155992	0.217493	F420014N23Rik
22.2346	7.82311	0.98698	5.4255	0.117426	Pip4k2c
6.83852	2.28543	1.05413	5.4255	0.00409325	Pip4k2c
4	2	18.1411	5.4255	0.0794926	Pip4k2c
4	2	1.09291	5.4255	0.000182697	Pip4k2c
6.65186	3.8216	0.981035	0.536634	0.0855625	Kif5a
4.50149	3.42965	1.01247	0.536634	0.0481785	Kif5a
32.3546	17.8212	1.0591	0.536634	0.000841176	Kif5a
23.2425	6.67701	0.931773	46.8082	0.204332	Dctn2
4	2	1.0193	46.8082	0.0121591	Dctn2
6.7682	0.979122	0.782275	46.8082	0.106952	Dctn2
6.24502	5.04563	1.00881	11.5	0.0418996	Mbd6
34.9904	24.8506	0.717605	11.5	0.630127	Mbd6
10.977	2.49901	1.08122	11.5	0.0439257	Mbd6
10.5759	0.48595	0.98925	13.1654	0.594017	Ddit3
7.48512	6.97501	1.08924	13.1654	0.840319	Ddit3
4	2.33661e-16	1.38297	13.1654	0.138541	Ddit3
21.3817	4.25497	0.947155	15.8581	0.250051	Mars
4.21169	2.44098	0.935806	15.8581	0.0447809	Mars
7.17703	5.28742	0.927388	15.8581	0.00219309	Mars
5.84548	3.10838	0.969801	0.893892	0.211263	Arhgap9
12.7829	9.07072	0.852179	0.893892	0.556644	Arhgap9
4	2	0.234933	0.893892	0.692988	Arhgap9
12.8696	9.74358	0.922904	38.651	0.310301	Inhbe
4.87968	3.25809	0.874104	38.651	0.412303	Inhbe
7.618	2.69872	1.06156	38.651	0.0238068	Inhbe
23.0621	21.3541	0.999725	42.4999	0.230096	Inhbc
11.443	4.80736	1.03021	42.4999	0.0515785	Inhbc
6.10138	0.962012	0.959636	42.4999	0.00725726	Inhbc
4.48729	2.39779	0.839202	18.8435	0.0486147	R3hdm2
22.2434	8.15573	1.09033	18.8435	0.0209089	R3hdm2
11.3507	2.92158	1.05392	18.8435	0.00498677	R3hdm2
5.22639	2.94012	0.796658	0.415989	0.00950597	Stac3
15.1026	11.5174	0.750938	0.415989	0.0112453	Stac3
7.59145	4.43473	0.732792	0.415989	0.00528617	Stac3
4	2	1.11585	1.68133	0.0899222	Ndufa4l2
5.49709	3.58025	1.25686	1.68133	0.030975	Ndufa4l2
10.3188	4.29507	1.28751	1.68133	0.0155389	Ndufa4l2
21.8233	11.5968	0.936636	116.31	0.130173	Shmt2
8.17865	2.90312	0.985384	116.31	0.00723927	Shmt2
5.70111	3.80232	0.731992	116.31	0.105677	Shmt2
33.0447	24.7122	0.908002	33.3348	0.358541	Lrp1
7.32119	1.24382	0.98144	33.3348	0.0525408	Lrp1
5.00376	0.970383	0.956104	33.3348	0.11923	Lrp1
4.67613	0.68139	0.982662	14.6136	0.0682863	Stat6
22.0418	3.98982	0.924411	14.6136	0.131356	Stat6
10.5623	9.08884	1.13114	14.6136	0.0251633	Stat6
4.5836	2.50249	0.983052	7.56826	0.145693	Nab2
5.93182	4.04511	1.03198	7.56826	0.102342	Nab2
4.09333	1.21395	1.41813	1.4632	1.37311	1700012D01Rik
6.96332	4.14954	1.11447	1.4632	0.28963	1700012D01Rik
14.9221	7.45984	1.19227	1.4632	0.0817266	1700012D01Rik
9.6729	8.26872	1.00412	0.74364	0.0847585	Tmem194
20.7629	6.04898	0.953841	0.74364	0.432814	Tmem194
5.23781	5.04165	0.943437	0.74364	0.133482	Tmem194
22.2139	3.97941	1.01175	1.97694	0.052308	Zbtb39
10.6123	5.12544	1.00651	1.97694	0.02209	Zbtb39
8.14927	2.15128	1.05615	1.97694	0.0266365	Zbtb39
7.9587	4.76309	0.971121	9.87966	0.158859	Gpr182
4.343	2.63501	0.827419	9.87966	0.501352	Gpr182
21.3546	17.3452	0.717631	9.87966	0.760159	Gpr182
25.5116	8.96587	0.979678	0.537646	0.248553	Rdh1
10.1144	7.57428	0.951084	0.537646	0.200527	Rdh1
5.31386	3.17364	0.916203	0.537646	0.277556	Rdh1
22.9696	10.2991	1.01423	15.77	0.30754	Rdh9
4.44918	2.39938	0.950045	15.77	0.459297	Rdh9
7.57379	5.22312	0.975924	15.77	0.220501	Rdh9
23.8551	9.70327	0.991623	24.9306	0.197449	Rdh16
5.99201	2.61252	0.545965	24.9306	0.714843	Rdh16
9.84354	8.10408	0.960286	24.9306	0.0617262	Rdh16
7.59693	2.28099	0.995642	1.78789	0.121351	Rdh18-ps
11.1484	5.42417	0.990737	1.78789	0.0859976	Rdh18-ps
22.2811	8.78018	0.922504	1.78789	0.165654	Rdh18-ps
22.7054	10.7051	0.892879	0.732291	0.558228	Rdh19
6.62122	1.36995	0.955016	0.732291	0.152312	Rdh19
4	4	1.06379	0.732291	0.0640709	Rdh19
18.9154	6.39536	0.972817	43.192	0.122023	BC089597
5.81748	2.73511	0.933245	43.192	0.283116	BC089597
4	5.07262e-17	0.85535	43.192	0.0826754	BC089597
24.7784	6.30707	0.871682	460.346	0.363737	Rdh7
5.91184	2.43564	0.968732	460.346	0.0636032	Rdh7
11.5514	8.77131	1.03658	460.346	0.0148103	Rdh7
23.8508	23.1876	0.999604	9.05172	0.356259	Sdr9c7
7.68014	3.46969	0.965762	9.05172	0.0859181	Sdr9c7
12.1363	0.319815	1.06297	9.05172	0.0232158	Sdr9c7
23.8875	11.7724	0.987202	36.3002	0.26823	Hsd17b6
4.95642	3.36744	0.963584	36.3002	0.326675	Hsd17b6
11.5993	6.00094	0.980987	36.3002	0.166676	Hsd17b6
6.02819	3.95219	0.962694	1.00027	0.112881	Prim1
20.034	4.49902	1.07305	1.00027	0.106894	Prim1
4	2	5.57015	1.00027	0.0849455	Prim1
4	4	1.39704	1.00027	0.00305818	Prim1
19.3993	9.09254	0.763788	94.0931	0.468936	Naca
4	2	0.34616	94.0931	0.228315	Naca
7.97426	7.68415	1.01392	94.0931	0.00388533	Naca
10.9693	3.21014	0.99829	39.8997	0.0518782	Ptges3
4.95489	4.92902	0.965116	39.8997	0.05747	Ptges3
21.9945	18.6165	1.04249	39.8997	0.0486833	Ptges3
5.58966	2.81542	1.02715	549.594	0.013416	Atp5b
17.732	5.08416	1.07045	549.594	0.00755872	Atp5b
10.7813	4.00126	1.02873	549.594	0.00191029	Atp5b
12.2426	11.8931	0.955708	6.02587	0.0539771	Baz2a
7.80615	3.17903	1.12331	6.02587	0.0240518	Baz2a
6.77965	3.19268	1.01064	2.90349	0.0674911	Rbms2
16.0446	3.70332	1.07316	2.90349	0.0182329	Rbms2
5.05997	3.46202	1.09118	2.90349	0.00468111	Rbms2
5.53904	3.9477	0.942452	143.45	0.154362	Gls2
13.8525	1.95678	1.01791	143.45	0.0316363	Gls2
7.438	0.630392	1.05232	143.45	0.0418446	Gls2
8.36357	2.25782	1.00975	12.4975	0.0286722	Spryd4
4.89761	1.77622	1.0693	12.4975	0.021823	Spryd4
28.8206	6.50997	1.14115	12.4975	0.00525885	Spryd4
8.35069	7.30382	1.04423	0.672108	0.170993	Timeless
4.5573	3.15107	0.963471	0.672108	0.0677718	Timeless
24.782	13.7604	1.09708	0.672108	0.0318112	Timeless
28.4283	22.7577	0.993662	90.7712	0.145281	Apon
4.79566	2.51324	0.989659	90.7712	0.123803	Apon
6.9335	1.67844	0.954769	90.7712	0.119978	Apon
4	1.69758e-17	0.998808	212.054	0.00872633	Apof
6.69418	2.03204	0.938628	212.054	0.0787274	Apof
18.4849	7.69527	1.04916	212.054	0.0459651	Apof
11.9146	0.0225238	1.00296	13.2371	0.100437	Stat2
24.6143	21.8833	1.02273	13.2371	0.119354	Stat2
7.30496	0.172404	1.03143	13.2371	0.112784	Stat2
21.4027	3.2395	1.01619	5.29755	0.105241	Pan2
4.48952	4.02414	1.06996	5.29755	0.0965355	Pan2
10.8672	2.44829	1.08833	5.29755	0.024348	Pan2
5.62544	1.21992	0.996547	31.2808	0.0441552	Cnpy2
20.9697	5.39882	0.949712	31.2808	0.195095	Cnpy2
4	2	1.03214	31.2808	0.0144884	Cnpy2
4	2	1.25273	31.2808	0.00978949	Cnpy2
25.4851	0.516111	1.00806	53.8593	0.144153	Cs
7.03464	3.99438	1.00247	53.8593	0.0147071	Cs
5.09166	4.23321	0.85399	53.8593	0.0241332	Cs
17.6378	3.14774	0.858625	6.81441	0.0433975	Coq10a
5.12712	4.30263	0.825602	6.81441	0.0154027	Coq10a
8.43176	2.2471	0.872029	6.81441	0.00287243	Coq10a
11.344	10.2796	1.03599	6.54165	0.02865	Ankrd52
4.1101	1.0634	1.11899	6.54165	0.0363259	Ankrd52
7.64951	5.35281	1.16465	6.54165	0.00418586	Ankrd52
5.04595	2.98094	0.747596	0.467487	0.980041	Slc39a5
4	2	0.506772	0.467487	0.836416	Slc39a5
17.5949	9.78224	0.8345	0.467487	0.294744	Slc39a5
5.91412	5.79099	0.983238	30.9201	0.0461352	Nabp2
12.755	1.77512	0.951489	30.9201	0.125765	Nabp2
4	2	0.599402	30.9201	0.0773382	Nabp2
26.2408	1.81859	0.965986	1.74319	0.133736	Rnf41
11.3383	10.0031	0.97218	1.74319	0.0621478	Rnf41
4.60648	4.59009	1.02963	1.74319	0.00169253	Rnf41
11.4324	2.91187	1.06208	20.5288	0.0148518	Smarcc2
5.41827	1.77221	1.03465	20.5288	0.00816477	Smarcc2
30.6306	15.151	1.18983	20.5288	0.0061245	Smarcc2
4	2	0.991979	175.914	0.0120937	Myl6
9.10095	7.69885	0.939801	175.914	0.0850089	Myl6
5.19991	3.10399	0.779609	175.914	0.192211	Myl6
11.3169	1.77923	1.06566	0.607922	0.130287	Myl6b
4.9853	2.45356	1.05097	0.607922	0.0864628	Myl6b
23.2064	9.97247	1.1045	0.607922	0.0788577	Myl6b
21.5489	15.1617	0.992635	1.00754	0.217292	A430046D13Rik
4.7273	2.96169	0.984701	1.00754	0.128264	A430046D13Rik
6.84474	5.41954	1.04981	1.00754	0.00105235	A430046D13Rik
12.0334	10.2577	0.993966	3.78143	0.0513101	Esyt1
6.72871	3.13621	0.985394	3.78143	0.0313884	Esyt1
23.5916	4.76311	1.03922	3.78143	0.0524162	Esyt1
5.25825	1.69738	1.00284	3.60557	0.0289785	Zc3h10
19.6398	16.4328	1.01305	3.60557	0.0797168	Zc3h10
7.56965	3.13892	1.51663	3.60557	0.0547185	Zc3h10
5.79466	0.680572	0.974505	649.494	0.0626721	Rpl41
19.9885	0.941059	1.03045	649.494	0.0221183	Rpl41
10.0386	6.25464	1.05413	649.494	0.00743007	Rpl41
6.14991	5.99639	1.00727	27.6589	0.018303	Pa2g4
22.929	14.87	0.941465	27.6589	0.124755	Pa2g4
[truncated: 39,878 more rows]
