# Supplementary material for: 12-h clock regulation of genetic information flow by XBP1s
Source: PLoS Biol. 2020 Jan 14;18(1):e3000580. doi: 10.1371/journal.pbio.3000580 (PMC6959563; doi:10.1371/journal.pbio.3000580)
Supplement: S4 Data — (XLSX) [file pbio.3000580.s030.xlsx]

## Sheet: Fig 4A
Gene symbol_mean value	Raw data																								Superimposed 12h
	12	14	16	18	20	22	24	26	28	30	32	34	36	38	40	42	44	46	48	50	52	54	56	58	12	14	16	18	20	22	24	26	28	30	32	34	36	38	40	42	44	46	48	50	52	54	56	58
Vps37a_669.93	0.00331921	0.0272604	-0.190631	0.0706834	-0.0436182	0.0186115	0.114618	-0.0453118	0.0326714	-0.0956902	-0.000890231	0.0711055	0.21516	0.129219	-0.406223	-0.572262	0.073607	0.218207	-0.00795022	0.238579	0.0258953	0.0899102	-0.126182	-0.0919493	0.00522066	0.00157715	-0.00503155	-0.00449478	0.00321344	0.0067648	5.1033e-05	-0.00761018	-0.00416607	0.00626484	0.00804484	-0.00269538	-0.0105573	-0.00266291	0.010342	0.00857364	-0.00702942	-0.0135142	0.000607073	0.0153577	0.00764326	-0.0132641	-0.015833	0.00630796
Camkk2_96.258	-0.0429593	0.00717407	0.059782	-0.307847	0.169595	0.0733787	0.156764	0.0636143	-0.159432	-0.0470485	0.158795	-0.376366	-0.143217	0.00897221	0.0219667	0.325092	-0.0155519	-0.163202	-0.173398	0.342276	-0.0578867	-0.123516	0.00535802	-0.0168268	0.0783882	0.0249363	-0.0751391	-0.0673992	0.0430987	0.0910169	0.00280926	-0.103046	-0.0568628	0.0752902	0.0975194	-0.029851	-0.129729	-0.0344526	0.110879	0.0945262	-0.073888	-0.150768	0.00147796	0.146863	0.0782289	-0.129086	-0.16045	0.0512312
Fgfr2_562.953	0.321425	-0.212314	0.0989931	-0.285607	-0.05995	-0.039996	-0.274105	-0.280476	0.0559919	-0.0165573	0.0440644	0.239113	0.0976227	0.0156332	0.204396	0.398494	0.376536	-0.479039	-0.376567	-0.492092	-0.128782	-0.142483	-0.0181616	0.398297	0.263962	0.0831069	-0.237718	-0.196693	0.103923	0.203129	0.00924411	-0.20595	-0.105681	0.118202	0.144348	-0.0374167	-0.163675	-0.0427852	0.114166	0.0928253	-0.0615582	-0.120628	-0.00213466	0.0996584	0.0512925	-0.0691036	-0.0822139	0.0216519
Nfix_835.703	-0.0829384	0.0220029	-0.0220167	-0.00546732	0.0908078	0.0885186	0.0646186	-0.0599449	-0.156557	0.209918	-0.115115	-0.0660337	-0.253233	0.0485202	-0.112075	0.222086	-0.0568945	0.180302	-0.041559	0.0459169	0.0418638	-0.213429	0.066701	-0.0127782	0.0334698	0.0154114	-0.0259776	-0.0282901	0.0115019	0.0329677	0.00508604	-0.0307041	-0.0201875	0.0199214	0.0293936	-0.00511693	-0.0321774	-0.0107337	0.0258726	0.0232688	-0.0142269	-0.0304608	-0.000936258	0.0289803	0.0153152	-0.0214255	-0.0259364	0.00824865
Ski_794.929	0.0504968	-0.0183797	-0.0467147	0.00894566	-0.0901668	-0.0581512	0.0704671	0.0110271	0.0187244	0.0665274	0.0366148	0.0786658	0.0238256	0.0261985	-0.30476	-0.0784857	-0.0169239	0.0698666	0.0764837	-0.124538	0.226013	-0.00555716	-0.0549059	-0.0390082	0.0132821	0.00495841	-0.0125939	-0.012684	0.00735969	0.0184324	0.00180955	-0.0203948	-0.013341	0.0157675	0.0237889	-0.00490041	-0.0305076	-0.0111408	0.0281678	0.0281761	-0.0169445	-0.0425397	-0.00389941	0.0451567	0.0295373	-0.0364997	-0.0551728	0.0112974
Ccdc12_2578.255	-0.0671935	0.126635	0.0149739	-0.0205287	0.000547192	-0.000367767	-0.0498954	-0.133546	-0.0920196	-0.0485033	0.0280021	-0.0104235	0.0145841	-0.0367	0.267586	0.314811	-0.0440611	-0.0690187	-0.0531703	-0.199783	-0.231096	-0.0502316	0.0601483	0.152459	0.0069628	0.00233158	-0.0067719	-0.00655481	0.00410162	0.0098721	0.000871248	-0.0110169	-0.00726213	0.00856707	0.0132083	-0.00241325	-0.0168316	-0.00673009	0.0154782	0.01652	-0.00860535	-0.0243162	-0.00376858	0.0255537	0.01888	-0.0191829	-0.0332095	0.00341006
Ssrp1_4275.455	0.0232695	-0.0306465	-0.0575886	-0.189275	0.0951531	0.020854	0.181843	0.189207	0.0165901	-0.0221902	-0.153432	-0.104324	-0.133283	-0.0835577	-0.094211	0.267281	-0.125723	-0.0128233	-0.0907706	0.13212	0.219374	-0.0244652	-0.0470248	-0.104362	0.0601962	0.0237449	-0.0502625	-0.0505419	0.0237325	0.0610257	0.00821793	-0.0596169	-0.0390722	0.0382329	0.0576645	-0.00849379	-0.0649809	-0.024618	0.0503465	0.0502059	-0.0252596	-0.0658199	-0.00818715	0.0592266	0.039004	-0.0408739	-0.0619433	0.00907235
Brwd3_58.678	0.116071	-0.232309	0.0502471	-0.069755	0.0290062	0.257114	-0.0504981	-0.237384	-0.144232	0.152224	-0.00366199	0.168052	-0.0184068	0.00110322	-0.141251	0.185185	-0.158143	-0.207527	-0.0572037	-0.0852995	0.320979	0.106995	-0.0559598	-0.1133	0.142912	0.0613665	-0.124314	-0.130637	0.054471	0.146986	0.0238914	-0.151296	-0.102185	0.090914	0.140977	-0.0181261	-0.168158	-0.0654505	0.121726	0.124744	-0.0620021	-0.172809	-0.0232609	0.144837	0.098687	-0.104531	-0.164241	0.0212151
Ppp1r3b_503.112	0.0126523	0.0651527	-0.0952081	0.0415799	-0.0971124	0.155343	-0.0625996	-0.337138	-0.155159	0.183689	0.154849	0.0774879	0.0926397	-0.0327701	0.0654058	0.25386	-0.274208	-0.322051	-0.103221	0.117913	-0.0266451	0.106574	0.0559432	-0.0647859	0.11313	0.0348655	-0.103566	-0.0921353	0.0521075	0.113991	0.0100027	-0.119216	-0.0733536	0.0752116	0.109401	-0.0171136	-0.129573	-0.0501569	0.0954944	0.0992572	-0.0453015	-0.133718	-0.0236553	0.111947	0.0836694	-0.0731897	-0.13107	0.0048611
Ntpcr_78.867	-0.109629	0.0100201	0.127334	-0.181993	0.0241716	0.0540045	0.105431	-0.133887	-0.0451603	0.123541	0.0617731	0.120321	0.0102512	-0.4934	-0.644138	0.350184	0.127681	0.0667788	0.244232	0.224458	-0.333493	0.0209817	-0.0964545	-0.0108228	0.0446067	0.0133057	-0.0426567	-0.0388459	0.0241746	0.0546359	0.00471749	-0.0594722	-0.0385341	0.0417002	0.0640205	-0.00941043	-0.0790425	-0.0334947	0.0640471	0.0713615	-0.0307308	-0.100619	-0.0216977	0.0912524	0.0747132	-0.0611077	-0.122716	-0.000870486
Sppl2a_4770.767	-0.0518318	-0.00652819	-0.00821647	0.198646	-0.0204708	0.0228695	-0.047241	-0.294967	-0.0411088	0.101083	0.0853585	0.0790117	0.0109503	-0.00538818	0.00474205	-0.0633025	0.0220461	-0.0424909	0.0411101	-0.0878078	0.00294201	0.0680085	-0.0215796	-0.00662826	0.0556148	0.0276537	-0.0391775	-0.0453471	0.0137637	0.0471543	0.0106326	-0.0395309	-0.0291945	0.0216763	0.0368555	-0.00189972	-0.035799	-0.0156145	0.0248071	0.0263117	-0.0101358	-0.0297313	-0.00507552	0.0244565	0.0166317	-0.0146474	-0.0227293	0.00241751
Mief2_67.875	0.0704294	-0.0669823	-0.0334174	-0.00675412	-0.121204	0.0281538	0.0687191	-0.0972584	0.0430441	-0.144403	0.0346591	0.026688	0.427769	-0.0882688	-0.665362	0.255397	0.194353	-0.030976	-0.0462889	-0.17986	-0.0555119	0.0747939	0.106367	-0.0800787	0.00638289	0.00296661	-0.00569362	-0.0065854	0.00285465	0.00909778	0.00180469	-0.009492	-0.00735874	0.00674629	0.0121326	-0.000969773	-0.0145861	-0.00698761	0.0127051	0.0150228	-0.00623798	-0.0209364	-0.00444435	0.0212091	0.0168891	-0.0151205	-0.0281323	0.00173301
Plscr1_30582.599	0.0447209	-0.0116054	-0.0125296	0.0105115	-0.100944	-0.0323083	0.00301802	0.00673924	-0.00925917	-0.0139654	0.0939527	0.0431421	0.0746198	0.0959012	-0.202417	-0.233441	0.222166	-0.0307404	0.054852	-0.146374	0.0202056	0.0930451	-0.0580892	0.0125691	0.0133737	0.0076668	-0.0113422	-0.0150876	0.00483956	0.0197983	0.00525704	-0.0202459	-0.0171154	0.0138379	0.0269233	-0.00122806	-0.0323445	-0.0160878	0.0278764	0.0333708	-0.0141251	-0.0473231	-0.0091772	0.0478647	0.0365698	-0.0363728	-0.0636165	0.00748909
Zfp275_681.793	0.0498705	-0.156578	0.0279499	0.0192318	0.0660535	0.102627	-0.0479973	0.059282	-0.237786	0.0874099	-0.0339345	0.0319136	-0.0847598	-0.00784146	0.0768735	0.0884228	-0.0550664	-0.0622767	-0.141737	0.181877	0.0472843	-0.0107612	-0.101867	0.0299956	0.0198126	0.0109467	-0.017168	-0.0222837	0.00758983	0.0294949	0.00755048	-0.0306784	-0.0256873	0.021008	0.0405524	-0.00189928	-0.0495246	-0.0247828	0.0422577	0.0511251	-0.0212125	-0.073713	-0.0152022	0.073045	0.0575528	-0.0555609	-0.101471	0.00922787
Stx18_561.43	0.0562187	-0.0591743	-0.00834056	-0.0838763	-0.0121052	-0.00900434	0.0407473	0.0616164	0.0787501	-0.107981	0.0924601	-0.0501925	0.123034	0.107587	-0.336667	-0.289997	0.0785985	0.100503	0.146433	0.0141355	-0.0153423	0.0831391	-0.0890245	-0.0305086	0.00619818	0.00203239	-0.00565018	-0.00542342	0.00309838	0.00765144	0.000949254	-0.00787011	-0.00548845	0.0054699	0.00905966	-0.00084939	-0.0104522	-0.00497193	0.00855063	0.0102405	-0.00356496	-0.0133089	-0.00360687	0.0123896	0.0109352	-0.00741048	-0.0162713	-0.00107402
Cox5b_6822.06	-0.0319081	0.0726054	0.00385538	-0.0533763	0.0344125	-0.122479	0.0318798	-0.040807	0.0766748	-0.100347	0.0117174	-0.0260726	-0.140546	-0.103314	0.424773	0.262545	-0.137478	-0.184909	-0.17132	0.0596161	-0.0282425	-0.0706656	0.0205292	0.0605569	0.00143317	0.000658996	-0.00132143	-0.00153607	0.000686091	0.00220808	0.000450446	-0.00236056	-0.00188262	0.00171604	0.00320515	-0.000198924	-0.00391774	-0.00200198	0.00348423	0.00435566	-0.00163767	-0.00611277	-0.00154938	0.00632257	0.00544451	-0.00439068	-0.00899142	6.72272e-05
Brox_692.717	0.00919177	-0.00725592	-0.0578671	0.0101646	-0.00327151	-0.0249506	0.0338079	-0.0470572	0.0581211	-0.0759804	0.125617	0.118529	0.0549591	0.0465717	-0.463326	-0.0945376	0.086694	-0.00634848	0.00698777	-0.0214364	0.158997	0.180337	-0.0870003	-0.120379	0.0102107	0.00484064	-0.00880594	-0.0103061	0.00413858	0.0137053	0.00296769	-0.0138219	-0.0109595	0.00932051	0.017267	-0.000862184	-0.0200361	-0.0100595	0.016615	0.020293	-0.00741732	-0.0271895	-0.00661776	0.0262289	0.0218331	-0.0175514	-0.0346429	0.000601509
Galnt4_321.299	0.0861556	0.038943	0.0427685	-0.104013	-0.137661	-0.0434656	-0.10246	-0.128234	0.00603963	-0.0588679	0.126039	0.0484343	0.0664644	0.0475326	0.0906652	0.459677	0.0399432	-0.306363	-0.228066	-0.228424	-0.0946412	-0.0800984	0.0826055	0.174989	0.00206627	0.000993542	-0.00173573	-0.00204855	0.000789664	0.00268764	0.00060432	-0.00263687	-0.00211273	0.0017457	0.00328183	-0.000124007	-0.00369514	-0.00188838	0.00303064	0.00373955	-0.00129197	-0.00484462	-0.00122912	0.00465106	0.00390407	-0.00299534	-0.00596344	3.53458e-05
Tlr1_140.903	-0.0868063	0.204883	-0.106636	0.126984	-0.0203729	0.075117	-0.584291	-0.133332	-0.273619	-0.0975904	0.305837	0.398251	0.415077	0.145135	-0.200212	-0.419002	0.150366	-0.141253	-0.311796	0.0151356	0.088528	-0.0249508	-0.118885	0.129171	0.0893916	0.043113	-0.0643349	-0.0733391	0.0220384	0.0747557	0.0176754	-0.0629748	-0.0477801	0.0328319	0.0584887	-0.00079727	-0.0563044	-0.0269976	0.0369306	0.0425468	-0.0129272	-0.0468149	-0.0111451	0.0363215	0.0282229	-0.0197349	-0.0363854	0.00012246
Ube2q2_1192.189	0.0253706	-0.107743	-0.0558243	0.0828558	0.00241188	0.00907048	-0.0531924	0.0509294	0.0370564	0.0424321	0.0787525	0.0145259	0.0407213	-0.0375814	-0.340484	-0.480749	0.0928902	0.302602	0.037422	0.242075	-0.0426268	0.0184637	-0.0234754	-0.124228	0.00220338	0.0011644	-0.00184791	-0.00234909	0.000782299	0.00308913	0.000836894	-0.00303683	-0.00263989	0.00196278	0.0040735	4.95532e-05	-0.00459657	-0.00261509	0.00373371	0.00503098	-0.00142434	-0.00651172	-0.0020096	0.00622111	0.00573466	-0.00386026	-0.00867703	-0.000456302
Ufd1l_1775.836	-0.0303903	0.0625691	0.00741331	-0.0603914	-0.079692	-0.00772702	0.0861668	-0.0262398	0.0733911	0.00781842	0.0291181	0.0272013	-0.00622572	0.0156125	-0.300087	-0.0111997	-0.040556	0.203252	0.0605152	-0.0911558	0.028432	0.066956	-0.0394051	-0.0377176	0.00834973	0.00435054	-0.00636173	-0.00796191	0.00231385	0.00945798	0.00270127	-0.00841979	-0.00734449	0.00476399	0.0101379	0.000522416	-0.0103168	-0.00608877	0.00738232	0.0102549	-0.00214524	-0.0118863	-0.00415249	0.0100217	0.0096852	-0.0052184	-0.0129499	-0.00153281
Map2k4_320.001	0.0463998	-0.0520308	-0.0268681	-0.142831	0.052918	0.0929652	0.0206611	0.0111254	0.109893	-0.263205	0.188479	0.0642455	-0.0526278	-0.0146454	-0.396547	0.214474	-0.0346228	-0.0704664	0.0788733	0.029746	0.057723	0.103311	-0.109134	-0.0439411	0.0217868	0.013918	-0.0156754	-0.0229892	0.00430068	0.025863	0.00918303	-0.0226054	-0.0215734	0.0121348	0.0284963	0.00238713	-0.0291105	-0.0177491	0.0206962	0.0290925	-0.00635419	-0.0344494	-0.011307	0.0293536	0.0270962	-0.0167114	-0.0378045	-0.00224705
Qdpr_2838.628	-0.0336776	-0.0182544	0.139171	-0.111474	-0.0350081	0.0203166	0.113751	-0.093018	-0.0394759	0.114967	-0.0454837	-0.0751905	0.0868035	-0.170751	-0.0064346	0.177662	-0.0506355	-0.0115996	-0.0521711	0.092923	-0.088235	0.0424183	0.00762021	-0.0240467	0.041915	0.0327602	-0.0291563	-0.0518511	0.00478569	0.0565749	0.0246065	-0.0505063	-0.0537056	0.0261375	0.0691779	0.0082481	-0.0743941	-0.0474552	0.0533139	0.0767736	-0.0179639	-0.0980135	-0.0302549	0.0846079	0.0757558	-0.0550292	-0.117014	6.0046e-05
Mdh2_17275.117	0.04041	-0.0212787	0.0373241	-0.0939947	0.00857826	0.0002036	-0.0872293	0.0367292	0.0263894	0.0329066	0.00871644	0.00205287	0.081613	0.0206867	-0.0154821	-0.161119	-0.048358	0.145607	-0.0618804	0.0876039	-0.0958866	-0.0158078	0.0311558	0.00588238	0.00172412	0.00123797	-0.00127315	-0.00208622	0.000304292	0.0025113	0.00101845	-0.00228156	-0.00238479	0.00127692	0.0033726	0.000389943	-0.0035972	-0.00238766	0.00275249	0.00417422	-0.000839525	-0.0051734	-0.00185328	0.00480652	0.00468717	-0.00288356	-0.00686602	-0.000465484
Zmpste24_2143.647	0.0401222	-0.0215863	0.0013747	-0.021238	0.0113577	-0.0185246	-0.0376682	0.02642	-0.0608264	-0.0226292	0.0619348	0.0429783	-0.0386428	-0.0391621	0.0910522	0.046447	-0.00918667	0.0313534	0.0186182	-0.048986	-0.0888666	-0.0767657	-0.0138068	0.106213	0.0151926	0.00549736	-0.0128724	-0.013063	0.0059931	0.0168694	0.00334019	-0.0158967	-0.0124963	0.00941692	0.0182163	0.000524849	-0.0189524	-0.0112546	0.013234	0.0190987	-0.00298565	-0.0219131	-0.00923407	0.0173716	0.0193702	-0.00720758	-0.0246261	-0.00634112
Krt7_6021.861	-0.126483	0.244439	-0.0501414	-0.228332	0.190129	0.201756	-0.217815	-0.090295	-0.212541	-0.101023	-0.0197949	0.00557194	0.0450358	-0.00678363	0.130312	0.428262	0.133517	-0.211564	-0.102464	-0.149579	-0.128634	-0.211359	-0.0948474	0.296992	0.0550549	0.0275714	-0.0445141	-0.0547274	0.0164254	0.0644154	0.0189528	-0.0602344	-0.0538501	0.0326266	0.0722784	0.00623158	-0.0768262	-0.0488964	0.0514311	0.0776761	-0.0110921	-0.0933672	-0.0389797	0.0723178	0.0795028	-0.0333891	-0.108608	-0.0233363
Rbm15b_235.342	0.136539	-0.118104	-0.0870385	-0.0309755	-0.0611267	-0.0187526	0.151237	0.0956115	0.0926397	-0.141653	-0.00240704	-0.0360842	0.0219548	-0.0513539	-0.211172	0.224286	-0.034177	-0.00763179	0.102944	-0.115566	0.00596675	-0.00604716	0.0357567	-0.0257593	0.00446123	0.00299632	-0.00352876	-0.0054961	0.00102229	0.00696078	0.0027347	-0.00661571	-0.00692922	0.00380348	0.0101762	0.00130786	-0.0112236	-0.00784627	0.00861286	0.0139303	-0.00219719	-0.0176795	-0.00735527	0.0162803	0.0176758	-0.00911615	-0.0261078	-0.0039759
Baiap2_20.245	0.201342	-0.205711	-0.00283345	-0.0868969	-0.0435415	-0.00968058	0.0155909	0.0571071	0.00468821	0.0489188	0.0488827	0.0447821	0.0375223	0.0280081	-0.21028	-0.200963	0.242714	-0.0144919	-0.0217025	-0.0257375	0.000313005	0.00132727	-0.00376893	0.00798075	0.00193351	0.000655738	-0.00159368	-0.0015693	0.000728285	0.00200385	0.00039654	-0.00181237	-0.00142967	0.00102892	0.00203264	0.000107494	-0.0020057	-0.00124537	0.00132904	0.00201591	-0.00020697	-0.00216711	-0.00101725	0.00162154	0.00195047	-0.000541471	-0.00229025	-0.000747217
Slc2a1_2916.589	-0.0776643	0.0787952	-0.026648	0.117773	-0.0727562	0.0769916	-0.0307205	-0.132043	-0.194344	0.101278	0.052766	0.144616	-0.051172	-0.0848984	-0.0267309	0.250345	-0.148415	-0.0234779	0.0415121	-0.0496741	-0.0571694	-0.0380907	0.0740024	-0.00763155	0.016887	0.00652284	-0.0135483	-0.0141884	0.00571148	0.0173297	0.00395094	-0.0154596	-0.0126263	0.00847007	0.0173158	0.00115189	-0.0170276	-0.0106473	0.0111113	0.0168255	-0.00180782	-0.0181926	-0.00828949	0.0135582	0.0158511	-0.00485397	-0.0189035	-0.00560283
Ndrg1_7083.206	0.0428696	-0.00793559	-0.0364829	-0.0135128	0.0365762	0.0616939	-0.120291	-0.300873	-0.16449	0.0768252	0.103739	0.286969	-0.130573	-0.201386	0.19859	0.547998	-0.240614	-0.185363	-0.0358408	-0.236471	-0.0625168	-0.0997828	0.0723024	0.113503	0.0167496	0.0123096	-0.0111434	-0.0188007	0.00181249	0.0202683	0.00874203	-0.0167884	-0.0179646	0.00804802	0.0226398	0.00350116	-0.0221163	-0.0151933	0.0149015	0.0233804	-0.00330425	-0.0265282	-0.0103235	0.0218535	0.0220484	-0.0113891	-0.029373	-0.00336548
Clcn5_146.858	0.0996625	0.0122437	-0.0918668	-0.144195	0.0206913	0.114512	-0.041622	-0.216802	-0.0567726	-0.365115	0.199892	0.243659	0.147647	0.0266998	-0.146663	0.429048	-0.145001	0.00961487	-0.195976	-0.401378	0.204007	-0.11766	-0.172845	0.26217	0.107316	0.0346962	-0.097253	-0.0929871	0.0439978	0.11343	0.021845	-0.11263	-0.0874299	0.0610267	0.117857	0.00664508	-0.127563	-0.0791207	0.0787425	0.120292	-0.0109269	-0.141609	-0.0679275	0.0968391	0.120426	-0.0308481	-0.154277	-0.0537822
Lrrc26_174.278	-0.114897	0.00161981	0.183578	0.00220613	-0.370281	0.387986	-0.0498819	-0.629545	-0.375738	0.123382	-0.266078	0.186469	-0.165332	-0.196651	0.497739	0.8253	0.121212	-0.378607	0.141452	-0.80165	-0.403641	-0.279315	-0.106022	0.509188	0.0637051	0.0562389	-0.0413413	-0.0861408	0.00052972	0.0883536	0.0463363	-0.0763319	-0.0929788	0.0332744	0.111043	0.0236212	-0.117599	-0.087553	0.0761962	0.127417	-0.015394	-0.161427	-0.064687	0.127053	0.131973	-0.0738451	-0.201182	-0.0201727
Atp1a1_7230.403	0.104804	-0.0922144	-0.00354968	-0.0526691	-0.159528	0.202116	-0.0279515	-0.190087	-0.110584	0.158686	-0.209465	-0.0174955	-0.107419	0.0845511	0.394884	0.469303	-0.162781	-0.365244	-0.110866	-0.215287	-0.106531	-0.141	0.35495	-0.0484987	0.0196707	0.00794339	-0.015746	-0.0170576	0.00634618	0.0207061	0.00530003	-0.0183459	-0.0157918	0.0096504	0.0213009	0.00226673	-0.0207104	-0.0139956	0.0130031	0.0213991	-0.00111546	-0.0227543	-0.0116682	0.0163221	0.020952	-0.00479237	-0.0243924	-0.00882343
Glo1_731.993	-0.0424972	0.022764	0.0707668	0.0337086	-0.0375724	0.120328	-0.109136	-0.17451	-0.26877	0.0850544	0.0734741	0.074705	0.0667728	0.052584	0.0849525	0.0870803	0.0452206	-0.149796	0.034102	-0.047594	-0.276243	0.019365	0.0313222	0.104772	0.0242885	0.0104259	-0.0190668	-0.0213563	0.00729061	0.0253319	0.00689107	-0.0221767	-0.0194453	0.0114226	0.0257453	0.00292944	-0.0248719	-0.016873	0.0154913	0.0254775	-0.00137894	-0.0270482	-0.0136715	0.0193817	0.024492	-0.0059387	-0.0286092	-0.00989306
Mbnl2_1055.707	0.0535248	-0.00662132	-0.0547694	-0.144276	0.101395	0.0692574	-0.0347165	0.0294788	-0.26585	0.17493	-0.0223141	0.196575	-0.089618	-0.143759	0.0340971	0.205765	-0.151939	-0.00978384	-0.131209	0.041541	0.122419	-0.104941	0.000721905	0.0179168	0.0594517	0.036687	-0.0423659	-0.0614313	0.0101412	0.0650783	0.0251308	-0.0550881	-0.0558052	0.0253475	0.0677188	0.0111474	-0.0659355	-0.046675	0.0402976	0.0669997	-0.0047621	-0.0741061	-0.034304	0.0541935	0.0626745	-0.0219359	-0.0788789	-0.0191628
Anks4b_504.306	0.0188202	0.146888	-0.00920202	-0.120298	-0.0892868	0.00659578	-0.096106	-0.26461	-0.0386397	0.118383	0.129252	0.172474	0.11774	-0.0752974	0.261714	0.0214045	-0.102455	-0.282341	-0.0433241	-0.152315	-0.0123031	0.0790166	0.0202027	0.0563552	0.0621888	0.0514024	-0.037207	-0.0723495	0.000864938	0.0689027	0.0343754	-0.0535568	-0.0624666	0.02122	0.0698425	0.0148225	-0.0650458	-0.0477149	0.0389773	0.0651144	-0.00563643	-0.0707508	-0.0295849	0.0528538	0.0552276	-0.025291	-0.0703062	-0.00977554
Gimap9_269.55	0.0709373	0.0785169	-0.140023	-0.218676	0.0601898	-0.0908875	0.0628135	0.142533	0.071338	-0.0518176	0.0517783	-0.0131044	0.191621	0.0425593	-0.445929	-0.107671	0.0706582	-0.0572636	0.0539601	0.0917405	-0.00508391	0.125602	-0.035911	-0.0863215	0.0142369	0.0049747	-0.0119622	-0.0121382	0.00529227	0.0155128	0.00357803	-0.014131	-0.0119365	0.00762315	0.0166547	0.00182908	-0.0163689	-0.0114062	0.0102054	0.0176099	-0.000297311	-0.0186343	-0.0104986	0.0130234	0.0183208	-0.00282217	-0.0208768	-0.00916516
Tmem37_813.7	-0.0937596	0.135203	0.00998881	-0.0117099	-0.0716737	0.105028	-0.101152	-0.0572943	-0.0697311	-0.0161228	-0.0280202	0.0470146	-0.0508207	-0.127004	0.101916	0.477621	-0.0812143	-0.050542	-0.0457642	-0.328813	-0.00480845	0.0200691	0.00357408	0.0759992	0.00444226	0.00399665	-0.00187521	-0.00418329	-0.000344662	0.00330905	0.00179293	-0.00193649	-0.0023729	0.000528219	0.00220813	0.000566823	-0.00157835	-0.00118937	0.000768994	0.00133698	-3.01263e-05	-0.00112519	-0.000486972	0.000712467	0.000728586	-0.000260272	-0.000723963	-0.000113255
Mettl15_228.586	-0.0996796	0.167342	-0.113515	0.0516289	-0.0846769	-0.0971692	0.00983732	0.0496449	-0.0822323	-0.0522396	0.210633	0.0839337	0.328118	-0.175599	-0.719022	-0.163092	0.310671	0.0690241	-0.0361957	0.0760868	-0.0275827	0.166424	-0.0931215	-0.0950049	0.0244824	0.0278803	-0.0123239	-0.0372668	-0.00562721	0.0364865	0.024854	-0.0273898	-0.0416844	0.00824273	0.0479347	0.0160047	-0.0452094	-0.0408715	0.0272302	0.0566356	-8.53204e-05	-0.06399	-0.0324323	0.0504072	0.0598293	-0.0243632	-0.0807825	-0.0142796
Mterfd1_2477.844	-0.0578487	-0.00145708	-0.0134113	-0.049884	0.113092	0.0101889	-0.0100034	-0.00999151	0.126034	-0.174769	0.0963239	0.00520195	0.0930168	0.0302805	-0.380836	-0.414909	0.0991166	0.23893	0.137041	0.149325	-0.0547367	0.0510571	-0.0601666	-0.0967648	0.000991545	0.000371218	-0.000910334	-0.000996593	0.000425148	0.00141216	0.00039336	-0.00138158	-0.00131664	0.000767318	0.00199363	0.000363057	-0.00207165	-0.00171292	0.00131313	0.00278949	0.000232396	-0.00307301	-0.00218781	0.00216664	0.00386713	-7.64663e-05	-0.00451352	-0.00273101
Nup62_1293.945	-0.0605984	0.0293318	0.152464	-0.26047	0.00343918	0.0113268	0.0743957	0.188391	-0.0969124	0.03291	-0.385737	-0.175492	-0.122442	-0.081026	0.333865	0.522496	0.0469898	-0.0602945	-0.322793	-0.054514	-0.0830197	-0.219084	0.095118	0.10551	0.0153563	0.0139057	-0.0103654	-0.0225694	-0.000498258	0.0259724	0.0153884	-0.02239	-0.0312526	0.00869989	0.0409408	0.0131974	-0.0422073	-0.0398479	0.0266406	0.060475	0.00325884	-0.0730233	-0.0449864	0.057904	0.0834808	-0.0212444	-0.118366	-0.0401349
Rpl27_29088.882	0.000865397	0.00871106	-0.0865602	-0.0173036	0.033938	-0.0126109	0.0133088	0.0906701	0.0819977	-0.0960926	0.0396833	-0.0374624	0.029463	0.0769932	-0.0411214	-0.421524	-0.0336514	0.108883	0.0133444	0.122975	0.0686645	0.126384	-0.00527909	-0.162094	0.00185107	0.0019648	-0.00106299	-0.00284707	-0.000325742	0.00309611	0.00206276	-0.0024481	-0.00371595	0.000795539	0.00470166	0.00164853	-0.00453396	-0.00437384	0.00283281	0.00656181	0.000316943	-0.00742352	-0.00440686	0.00611999	0.00838713	-0.0024843	-0.0110862	-0.00316182
Bcl9l_586.569	0.193516	-0.214426	-0.0669951	0.0545336	-0.265487	0.169892	-0.0776213	0.0610942	-0.113149	0.204819	0.0936276	0.0899862	-0.143054	-0.125758	-0.231641	0.353231	-0.176264	-0.194493	0.148877	-0.298389	0.393708	-0.0840489	0.00130296	-0.0662616	0.0690549	0.0221867	-0.0642453	-0.0643408	0.0289945	0.0837211	0.0212268	-0.082499	-0.0744481	0.0415393	0.100936	0.0186462	-0.105434	-0.0854461	0.0578325	0.120991	0.0137797	-0.134218	-0.0971537	0.0787392	0.144168	0.00574586	-0.170336	-0.109252
Klhl28_526.392	0.106233	-0.112635	-0.0915525	0.138788	-0.0581162	-0.0176557	-0.068279	0.049389	-0.109471	-0.0157145	0.124857	0.00909951	0.139662	0.157454	-0.200845	-0.291529	0.071057	0.0886727	0.017178	0.0209702	-0.0278099	-0.00894102	-0.080676	0.0628636	0.000847755	0.00080858	-0.000508794	-0.00118718	-7.92543e-05	0.00128811	0.000794935	-0.00101122	-0.00144727	0.000342012	0.00181012	0.000608458	-0.00170072	-0.0016155	0.00102286	0.00237124	0.000151859	-0.0025831	-0.0015856	0.00202721	0.00288772	-0.000693371	-0.00362928	-0.00120867
Chmp6_987.117	-0.00636933	0.074551	0.02774	-0.160833	-0.0178266	0.0636351	-0.0485178	0.0137163	0.00891988	-0.063488	0.0559322	-0.000959083	-0.0461319	-0.199636	0.121351	0.262928	0.0620372	0.00849384	-0.0219395	-0.129872	-0.267741	0.0591731	0.0203552	0.0892429	0.0451853	0.0573275	-0.0234785	-0.0851044	-0.0169741	0.0871364	0.0672636	-0.0720318	-0.125841	0.0187442	0.146795	0.0598431	-0.160551	-0.164492	0.0945713	0.221232	0.012408	-0.310745	-0.176734	0.226002	0.298561	-0.118018	-0.551857	-0.117323
Ghr_1022.351	0.0452172	-0.139011	0.00473394	0.157916	0.000233151	0.0206756	0.0575945	-0.266603	-0.00361672	-0.170671	0.0321581	0.191848	0.0409945	0.0821541	-0.134193	0.0614107	0.120319	-0.0481599	-0.110704	-0.0420228	0.00536223	0.0094406	-0.127791	0.117148	0.0158432	0.018434	-0.00662519	-0.0217336	-0.004084	0.0191684	0.0134519	-0.0124643	-0.0195803	0.00269107	0.020385	0.00741485	-0.0167148	-0.015596	0.0087575	0.0195048	0.000980298	-0.019035	-0.0103026	0.0135626	0.0167401	-0.00518714	-0.0193018	-0.00432024
Ginm1_1597.757	0.00383153	-0.000913014	0.00870627	-0.023084	-0.076285	0.0416981	-0.0112043	-0.0533953	0.0765002	0.019726	-0.0107966	0.00724695	0.0837818	-0.0303034	0.117861	-0.503241	0.0753031	0.111365	0.0792701	0.0818184	-0.0986275	0.0598577	-0.0713669	0.00273842	0.00262954	0.00123448	-0.0019619	-0.00238788	0.000614304	0.00277535	0.000978826	-0.00225837	-0.00229872	0.000966182	0.0028879	0.000686469	-0.00254221	-0.00216492	0.00133081	0.00296265	0.000359167	-0.00280775	-0.00198506	0.00170328	0.00299535	-6.11678e-07	-0.00304918	-0.00175833
Nab1_854.841	0.00858404	0.0811628	-0.0689095	-0.195302	0.197765	-0.0560214	0.0191859	-0.098102	0.0268267	-0.0802252	0.00263219	0.123579	0.0355724	-0.0979514	-0.122293	0.361692	-0.0356265	-0.17566	-0.156586	0.105234	0.0846406	-0.103689	-0.0983607	0.104416	0.037554	0.0460598	-0.0162642	-0.0587018	-0.012378	0.053273	0.0401029	-0.0368485	-0.0627176	0.0069684	0.0666134	0.0271747	-0.0589626	-0.059571	0.0307152	0.0752775	0.00673195	-0.0800915	-0.0476339	0.0569704	0.0768918	-0.0210299	-0.0969839	-0.0261151
0_175.391	-0.0378859	0.397522	-0.593202	0.0845414	-0.32634	0.498768	-0.000657956	-0.293094	0.011865	-0.0369538	0.136112	0.191924	-0.168307	-0.0526635	-0.047569	-0.0544132	0.00196238	-0.320973	0.313036	-0.0347076	-0.0180693	-0.0854513	0.0291957	-0.0299064	0.345658	0.143623	-0.264354	-0.27589	0.0649594	0.223115	0.0705306	-0.169894	-0.151345	0.0550857	0.140522	0.0311318	-0.108733	-0.083295	0.0428639	0.0867274	0.0112087	-0.0691688	-0.0454699	0.0316121	0.0526175	0.00191444	-0.0436839	-0.0244064
2310047K21Rik_72.892	0.154842	0.1438	-0.229271	-0.32001	-0.0183639	0.270809	-0.0855313	-0.400198	-0.262302	0.281598	0.275547	-0.0806738	0.302915	0.0898483	-0.191491	0.0726134	0.0354066	-0.0188244	-0.13851	-0.14071	-0.409434	0.0220139	0.216604	0.0641271	0.249507	0.116831	-0.198098	-0.233162	0.051434	0.212168	0.0759878	-0.179362	-0.176032	0.0631739	0.177931	0.0443112	-0.159074	-0.130873	0.0686753	0.147153	0.0204398	-0.138658	-0.0953699	0.0697313	0.119975	0.00304585	-0.119057	-0.0676669
Mir17hg /// Mir92-1_22.199	-0.204233	-0.0911951	0.296113	-0.000286763	0.0927416	-0.66785	-0.414196	-0.0581692	0.167568	-0.108024	0.0569529	-0.456055	0.291087	0.150884	-0.443493	-0.624292	1.2081	0.369123	-0.534984	-0.64221	-1.08241	0.705388	0.00733337	-0.0291795	0.0578989	0.0536628	-0.0387037	-0.0888611	-0.00442769	0.0956057	0.0605091	-0.0832478	-0.124205	0.0267647	0.147642	0.0561281	-0.158499	-0.162039	0.0861861	0.214398	0.0276099	-0.281752	-0.191504	0.185887	0.29274	-0.0483474	-0.480967	-0.190268
Zfand3_34.037	0.0772512	-0.0510081	-0.0503939	-0.0480401	0.0813344	-0.0390792	-0.0329546	-0.0260556	-0.0186237	-0.0109	0.0301461	0.220813	0.0116083	0.0180858	-0.293621	0.028275	0.0310644	0.0324349	0.0319255	-0.0912726	0.0243012	0.0167039	0.00626132	-0.00726778	0.00858462	0.00558935	-0.00586285	-0.00923323	0.000906082	0.0101379	0.0048258	-0.00794918	-0.00961223	0.0028683	0.0116389	0.00362748	-0.010234	-0.00964228	0.00522725	0.0130037	0.00193105	-0.0126641	-0.00922686	0.00797928	0.014132	-0.000321215	-0.0151647	-0.00826452
Adam15_239.124	0.0519295	-0.024549	-0.0949624	0.0151938	-0.0815677	0.0501908	-0.0595186	-0.00251943	-0.00574262	-0.31844	0.206129	0.0731669	0.185342	-0.205074	-0.389106	0.606134	-0.0891318	-0.0241961	0.0545103	-0.57539	0.166345	0.0749808	-0.0420976	0.0303551	0.0194701	0.010283	-0.0159128	-0.0214733	0.00483926	0.0267711	0.0109883	-0.0239642	-0.0272213	0.0103228	0.036307	0.0107201	-0.0353638	-0.0338759	0.0188636	0.0485647	0.00870395	-0.051326	-0.0412336	0.0317433	0.0640459	0.0037598	-0.0734671	-0.0488108
Eral1_212.054	-0.0118658	-0.0164595	0.0935803	-0.175877	0.175051	0.00946286	-0.0818381	-0.0737152	0.0224073	-0.0934708	-0.00553753	-0.0166044	0.0719209	0.151357	-0.0972768	-0.0476312	-0.0214445	0.109153	0.224374	-0.242721	-0.182836	0.0899661	-0.111328	0.119904	0.00150396	0.00050649	-0.00146389	-0.0015672	0.000716775	0.00233897	0.000682634	-0.00234726	-0.00235846	0.00125008	0.00363025	0.000895982	-0.00375443	-0.00353859	0.00215103	0.00562248	0.00113278	-0.00599186	-0.00529242	0.00366043	0.00868835	0.0013524	-0.00954417	-0.00788891
Aldh3b1_116.127	0.142243	-0.113922	-0.0577025	0.019851	-0.1255	0.120239	0.0943135	-0.333201	-0.214692	-0.0637224	-0.095845	0.0582684	0.0865175	0.0770969	0.229867	0.531492	0.10593	-0.254999	-0.151101	-0.421272	-0.533215	0.22793	0.00987575	0.228823	0.088479	0.0670271	-0.0610667	-0.112611	0.00312069	0.114443	0.0629878	-0.0954556	-0.12778	0.0301455	0.1425	0.0513015	-0.138988	-0.138383	0.0668596	0.17127	0.0290553	-0.192555	-0.141023	0.114154	0.198757	-0.00743213	-0.256533	-0.131505
Irf2_586.804	0.0487509	-0.0642718	-0.0888043	-0.000859877	-0.104784	-0.0341149	0.149184	-0.0523203	0.159577	-0.21284	0.146558	0.063258	0.161171	0.0874372	-0.717238	-0.0994713	0.083903	-0.145969	0.221244	-0.234422	0.492437	-0.00776911	-0.0198131	-0.20338	0.013431	0.018849	-0.00510413	-0.0240038	-0.0068086	0.0227814	0.0194626	-0.0153997	-0.0301656	0.00142783	0.0336107	0.0161294	-0.0296912	-0.0338568	0.0151325	0.0445518	0.0067367	-0.0476485	-0.0324343	0.034989	0.0532847	-0.0110668	-0.0678151	-0.0225928
Nop10_5180.053	-0.0504637	0.112102	-0.0594332	-0.0377784	0.0148536	-0.0733187	0.0630866	0.0838724	0.0240839	-0.151937	-0.0358104	-0.0934075	-0.159525	-0.0277297	0.438198	0.156073	-0.174538	-0.0299392	-0.014243	-0.0191858	-0.140189	-0.0773154	0.0605607	0.0548397	0.00356734	0.00380398	-0.00206268	-0.00571534	-0.000818106	0.00629252	0.00457485	-0.00487449	-0.00825187	0.00106793	0.0103471	0.00466926	-0.00968784	-0.0111257	0.00511276	0.0160063	0.00312919	-0.0174275	-0.0137037	0.0127085	0.0233176	-0.00170197	-0.029186	-0.0145963
Shisa5_4353.883	-0.0328464	0.00440669	0.139809	-0.0935616	-0.042042	0.0390618	-0.0019153	-0.21134	-0.159689	0.120452	0.0528434	-0.00657394	-0.150639	-0.202994	0.249582	0.572298	-0.00446618	-0.13472	-0.151855	-0.160331	-0.17	-0.136258	0.0467053	0.169489	0.016685	0.0103037	-0.0130998	-0.0200774	0.0028317	0.0245544	0.0118627	-0.0214549	-0.0270673	0.00812918	0.0355259	0.0125844	-0.0341892	-0.0357543	0.0172623	0.0505375	0.0114367	-0.0533324	-0.0460945	0.0322867	0.0706544	0.00667919	-0.0817995	-0.0576299
Ccdc71l_311.494	-0.000855708	0.210872	-0.0904665	-0.147644	0.087735	-0.184737	-0.00442124	-0.20427	-0.0680047	-0.0925152	0.198205	0.0547543	0.055904	0.0809051	0.0807113	0.413959	0.0722835	-0.353813	-0.184773	-0.242847	-0.0870528	-0.0548417	0.0626872	0.165638	0.02817	0.0308354	-0.0149408	-0.0442006	-0.00739797	0.0444632	0.0330695	-0.0328725	-0.057032	0.00568032	0.0649557	0.0301756	-0.059438	-0.0684745	0.0284339	0.0888436	0.0183291	-0.0966013	-0.0747163	0.0638213	0.11404	-0.00789363	-0.14578	-0.0698339
Tsn_2225.67	0.0339581	0.0276963	-0.0297231	-0.0737634	-0.0514518	-0.0577351	-0.0332357	0.140233	-0.0330692	0.0477138	0.0264608	0.0151351	0.114616	0.191295	-0.390223	-0.12601	-0.0455231	0.0647142	0.0791553	-0.114763	0.093865	0.0684717	0.0635582	-0.116379	0.00819311	0.0121988	-0.00276315	-0.0152569	-0.00489928	0.0143577	0.0130111	-0.00931994	-0.0196626	0.000134188	0.021784	0.0113513	-0.0187159	-0.022727	0.00894247	0.0296731	0.00571042	-0.0309059	-0.0226724	0.0222498	0.0365302	-0.00566885	-0.045122	-0.017132
Cbx5_691.293	0.166934	-0.171866	0.00566852	-0.249853	0.0139852	0.12966	0.118639	0.0804859	-0.0692922	-0.0934822	0.0573934	-0.0222382	0.0575456	-0.12932	-0.312648	0.355582	-0.048483	0.0945351	-0.0965623	0.0133977	-0.0150933	-0.0386837	-0.0380978	0.0373807	0.0862829	0.0316256	-0.0699299	-0.074282	0.0235024	0.0829888	0.0276805	-0.0688604	-0.0694764	0.0252139	0.079726	0.0239646	-0.0676805	-0.0648712	0.0267172	0.0765007	0.0204707	-0.0664027	-0.0604625	0.0280252	0.0733185	0.0171918	-0.0650387	-0.0562463
Srxn1_1062.662	-0.031037	0.181649	-0.130902	-0.0364017	0.0212333	0.00356527	-0.0614399	-0.160964	-0.0759439	-0.186835	0.216332	0.234958	0.0409709	0.171844	-0.213044	0.219801	-0.113075	-0.299344	0.115276	-0.156786	0.029686	0.0311965	-0.0235978	0.0515328	0.0340081	0.0278548	-0.0194217	-0.0395862	-0.00200609	0.0378591	0.0229654	-0.0262595	-0.0382268	0.00551552	0.0405933	0.0169848	-0.0325653	-0.03543	0.0132111	0.0420604	0.0100532	-0.0380773	-0.0312242	0.0208198	0.0421439	0.00235269	-0.0425459	-0.0256929
Lrwd1_270.269	0.0487216	0.0102805	0.0266064	-0.202355	-0.0934252	-0.033731	0.0549461	0.213433	0.05568	-0.0721702	-0.0116416	-0.0707465	0.0904823	0.0710092	-0.443736	0.173972	0.0659433	0.0551137	-0.215695	0.220755	-0.151842	-0.0114527	0.14722	-0.0996413	0.029552	0.0268558	-0.0161781	-0.0374792	-0.00365402	0.0359547	0.0236236	-0.0249118	-0.0388363	0.00455643	0.0416889	0.0184131	-0.0341233	-0.0382975	0.0141533	0.046315	0.0110829	-0.0433954	-0.0355034	0.0248777	0.0493647	0.00157202	-0.0522113	-0.0301565
Gm9840 /// Rbx1_2846.741	0.0330703	0.020259	0.130534	-0.159891	-0.110915	-0.0323907	-0.0339201	-0.0509574	-0.223618	0.120596	-0.0106908	-0.0446461	-0.0590501	-0.00309443	0.350444	0.559544	-0.190983	-0.107583	-0.24398	-0.204701	-0.209144	-0.1735	0.166162	0.169514	0.0144573	0.0232672	-0.00327552	-0.0261161	-0.00961052	0.0217876	0.0207432	-0.0122792	-0.0279865	-0.0012426	0.027756	0.0152366	-0.0214535	-0.026741	0.00871537	0.0314166	0.00685328	-0.0296902	-0.0219823	0.0193184	0.0319305	-0.0039385	-0.0357793	-0.0136961
Pwwp2a_508.983	0.0518919	-0.172012	-0.105087	0.146558	-0.094159	-0.0197155	0.130042	0.0255911	-0.10507	0.110054	0.0595468	-0.0218643	0.155648	0.139979	-0.844112	-0.475958	0.151553	0.326863	0.0234115	0.252143	0.0631434	0.0831778	-0.172717	-0.132881	0.000277529	0.000240387	-0.000184618	-0.000395342	-1.82638e-05	0.000457052	0.000295508	-0.000364247	-0.000568297	9.07944e-05	0.000727022	0.000328195	-0.000664573	-0.000787006	0.000315267	0.00112015	0.000298078	-0.00114874	-0.00104143	0.000735707	0.00167272	0.000131491	-0.00190431	-0.00129661
Cdc123_3698.226	0.0230078	0.0125424	0.0139846	-0.116374	0.0731936	-0.067165	0.0375047	0.0244733	-0.00793282	-0.104321	0.03824	-0.0328024	0.104782	0.0516475	-0.0355542	0.0563547	-0.0306889	-0.0271526	-0.0872579	0.122577	-0.106472	-0.0450637	0.0377937	0.0308249	0.0127521	0.00870602	-0.00767987	-0.0128586	0.000359971	0.0126594	0.00671216	-0.00871043	-0.0114578	0.00213363	0.0122931	0.00477871	-0.00943458	-0.00994964	0.00366755	0.0116904	0.00294272	-0.00986845	-0.00837999	0.00495347	0.0108901	0.0012352	-0.0100331	-0.00679107
Tspan31_2272.422	-0.0759058	0.108798	0.07628	-0.0359304	-0.00686901	-0.0885593	-0.0622357	-0.10416	-0.024073	-0.0407542	0.0560369	0.0294665	-0.0829842	-0.112978	0.209144	0.50148	-0.0833156	-0.100456	-0.15885	-0.176952	-0.116933	-0.0675163	0.0595281	0.121173	0.000373359	0.000172786	-0.000275461	-0.000339676	7.64924e-05	0.000389971	0.000155284	-0.000302763	-0.000338225	0.000105032	0.000405536	0.000135643	-0.000330282	-0.000334734	0.000135009	0.000419891	0.000113822	-0.000357876	-0.000329076	0.000166353	0.000432867	8.979e-05	-0.000385392	-0.00032113
Rasgef1b_824.267	0.0299295	0.020509	-0.00259248	-0.061615	-0.171474	0.0557276	-0.136622	0.179171	-0.0366009	0.135186	0.0591866	0.151434	0.0345383	-0.11416	-0.479796	-0.058163	0.065682	0.197137	0.0159134	-0.0397006	0.109866	-0.0366572	-0.0289728	-0.0342015	0.0188895	0.00616464	-0.0155793	-0.0159259	0.00594733	0.0196286	0.00613352	-0.0163679	-0.0163807	0.00645963	0.0203922	0.00608915	-0.0171913	-0.0168431	0.0070014	0.0211809	0.00603054	-0.0180506	-0.0173128	0.00757403	0.0219953	0.00595665	-0.0189473	-0.0177897
Tomm20_6684.355	-0.111809	0.0848007	-0.0790605	-0.045861	0.00791361	0.0321658	0.12598	0.15371	0.0662569	-0.122181	0.0219323	-0.158583	0.0982892	0.0140835	-0.475234	-0.297945	0.158999	0.0892213	0.0791733	0.187651	0.0619254	0.208948	-0.0586056	-0.24929	0.0151173	0.0121053	-0.0094273	-0.0186576	-0.00054223	0.0195635	0.011889	-0.0144518	-0.021331	0.00331301	0.0245568	0.0106557	-0.0207168	-0.0235917	0.00868826	0.0299672	0.00802458	-0.0283228	-0.025068	0.0158617	0.0355752	0.00354005	-0.0373124	-0.0252766
Elk3_3032.211	0.0869939	0.0747195	-0.0384381	-0.103139	-0.0879892	-0.1166	-0.0501956	-0.0181622	0.0364807	0.00658126	0.094497	0.143625	0.167973	0.0659936	-0.142493	-0.0494265	0.0471735	-0.106029	-0.139925	0.0433855	-0.0647821	0.00756847	0.0150964	0.0649302	0.00992592	0.0068714	-0.00638117	-0.0108667	0.000363739	0.0114054	0.00621662	-0.00831819	-0.0112992	0.0021156	0.0128506	0.00524097	-0.0104102	-0.011483	0.00416405	0.0142118	0.00390653	-0.012627	-0.0113611	0.00650855	0.0154316	0.00217799	-0.0149281	-0.0108741
Zdhhc5_1197.327	0.0569245	-0.0656695	0.0222066	-0.151467	0.0246021	0.0942255	0.105654	-0.0322099	-0.0379752	-0.0915606	-0.0082975	0.0410934	-0.053428	0.00446231	-0.170215	0.275293	-0.0376166	0.0301658	0.121546	-0.247577	0.0528826	-0.0896859	0.0278977	0.037372	0.0797436	0.0649193	-0.0487284	-0.0998295	-0.00468571	0.0948147	0.0592044	-0.0696595	-0.105373	0.0132979	0.109361	0.0496016	-0.092876	-0.107563	0.0346859	0.122695	0.0355218	-0.117942	-0.105492	0.0592766	0.134034	0.0163847	-0.144201	-0.0982593
Shfm1_5555.065	0.0007532	0.0658904	-0.0486033	-0.00123349	0.0725812	-0.157562	0.0254044	-0.0506235	0.0113818	-0.0723112	0.0184776	-0.0239148	0.0727341	0.0119191	0.158994	0.167339	-0.0496021	-0.12025	-0.138533	-0.0118334	-0.0636046	0.00352121	0.00411721	0.0726589	0.0285688	0.0151782	-0.0200618	-0.0272598	0.00406229	0.029144	0.0131854	-0.0218596	-0.0262682	0.00640108	0.0295419	0.0110909	-0.023535	-0.0251023	0.00871465	0.0297585	0.00890674	-0.0250762	-0.0237686	0.0109884	0.0297913	0.00664567	-0.0264718	-0.0222746
Slc39a10_1295.586	0.167637	-0.213816	-0.138955	-0.0120655	-0.0246463	-0.0137022	0.0589557	0.391641	-0.0507208	-0.0316204	0.00579116	-0.0839571	-0.0683178	-0.00463396	-0.259912	-0.122594	-0.327375	0.348108	0.188718	0.00730987	0.0738983	0.0503441	-0.0092008	-0.159107	0.0870387	0.142496	-0.0250709	-0.206382	-0.0779232	0.176525	0.181591	-0.122924	-0.33065	-0.0217217	0.305838	0.198346	-0.323425	-0.486003	0.114579	0.471473	0.155051	-0.734179	-0.63078	0.357795	0.657113	-0.0280218	-1.73109	-0.644839
Cryl1_218.152	-0.0499644	0.0562522	0.0994135	-0.0672623	-0.274797	0.152646	0.16507	-0.0232887	-0.117799	-0.326583	0.0676233	0.110338	0.0986199	0.0510861	-0.0196132	0.0329429	0.330891	-0.33828	-0.178298	-0.180223	0.139092	0.0487822	0.0671639	-0.0530506	0.110506	0.186563	-0.0169958	-0.225219	-0.0888579	0.15796	0.159984	-0.0866156	-0.228859	-0.0203506	0.189662	0.115809	-0.151764	-0.20656	0.0487342	0.202969	0.0568673	-0.20412	-0.161129	0.111452	0.196528	-0.0123444	-0.235966	-0.0986316
Crkl_341.195	0.131347	0.108058	-0.238977	-0.248333	0.0860783	0.140668	-0.0981022	0.0984769	-0.196713	-0.0639375	0.0203282	0.200003	0.0571479	-0.0827291	0.184124	0.137892	-0.0512214	-0.181983	-0.105638	-0.136828	-0.0113926	0.0297371	0.00609081	0.0745126	0.144463	0.129425	-0.0654955	-0.159095	-0.0205678	0.116325	0.0771017	-0.0671615	-0.106192	0.00540525	0.0892876	0.0413384	-0.0604025	-0.06816	0.0177985	0.0656683	0.0182884	-0.0501848	-0.0416481	0.0220852	0.0463566	0.00443307	-0.0394055	-0.0237634
Cyb5d2_122.981	-0.0544084	0.0903612	0.0771595	-0.182616	0.0834999	-0.0398491	0.0585897	-0.113689	-0.358331	0.0323269	0.218342	-0.143131	0.134799	0.0166359	0.0455864	0.42904	0.0464859	-0.397324	-0.266919	-0.116312	0.145638	0.0319221	-0.0891825	0.0900036	0.0966587	0.0488684	-0.0823442	-0.110063	0.0221062	0.126488	0.0575192	-0.114738	-0.141837	0.0371259	0.164587	0.0666509	-0.15978	-0.182681	0.0589821	0.212808	0.0757239	-0.222854	-0.2353	0.0901516	0.273206	0.0838316	-0.312244	-0.303354
Tspan15_2098.653	-0.0216176	0.00791663	0.18477	-0.195884	-0.00183953	0.0998354	-0.117513	-0.111093	-0.108901	0.0100404	0.0287853	0.064215	-0.0505873	-0.108531	0.0777063	0.429793	0.0565522	-0.0947328	0.039438	-0.259267	-0.23345	-0.0895368	0.00872798	0.20178	0.0403053	0.015342	-0.037277	-0.0426367	0.0144967	0.056771	0.0213084	-0.0533589	-0.0604937	0.0209583	0.0797764	0.0295611	-0.07656	-0.0860503	0.0302535	0.111745	0.0409503	-0.110234	-0.122865	0.0435867	0.155844	0.0566212	-0.159549	-0.17641
C1d_6698.809	-0.00838004	0.0800187	-0.0434679	0.0215597	-0.105534	-0.0363362	-0.0154408	-0.0732319	0.0985976	-0.0126129	0.055844	-0.0149929	0.156123	0.174255	-0.146948	-0.253038	-0.0370552	-0.0218434	0.110033	-0.0372247	-0.0846208	0.155825	0.0412699	-0.0841888	0.000256317	0.000419924	-6.91421e-05	-0.000525481	-0.000205643	0.000498173	0.000509884	-0.000301155	-0.000756345	-6.17975e-05	0.000844288	0.000531285	-0.000691793	-0.000993873	0.000262509	0.00129615	0.000400756	-0.00128843	-0.00116684	0.000860654	0.00182196	-7.65745e-06	-0.00212304	-0.00114612
Nampt_1016.065	-0.0424149	-0.126772	0.0449787	-0.0696094	0.186357	0.190865	0.189781	-0.13013	-0.133391	-0.0773527	-0.236014	-0.206346	-0.0939762	-0.0500109	0.288801	0.230921	0.165034	-0.0382153	-0.192706	0.0685516	-0.164525	-0.00618096	-0.00787726	0.0289965	0.0339838	0.0153347	-0.0282136	-0.0350668	0.00863745	0.0428605	0.0179931	-0.0366963	-0.0435076	0.0124948	0.0539588	0.0209738	-0.0476862	-0.0539422	0.0177457	0.0677968	0.0242617	-0.0619325	-0.0668392	0.0248367	0.084997	0.0278121	-0.0804233	-0.082781
Snrpn /// Snurf_252.66	-0.0697842	0.0636456	0.0908834	0.0580887	-0.0897333	0.0123618	-0.0851685	-0.216468	0.0122395	-0.00295294	-0.0164416	0.20155	-0.0876551	-0.0624478	0.102697	0.322305	-0.0371606	-0.0751564	-0.0947664	-0.0976665	-0.0909398	-0.066655	-0.0462329	0.162844	0.00556509	0.00889667	-0.0017427	-0.0117987	-0.00447617	0.0116427	0.0118861	-0.00745967	-0.0186947	-0.00140486	0.0214831	0.013736	-0.0185353	-0.0272223	0.00713823	0.036111	0.0117634	-0.0380474	-0.0357038	0.0253941	0.0558206	0.000897025	-0.0698917	-0.0397875
Lpin2_386.592	-0.0410401	0.0921931	-0.084301	0.034178	-0.0855313	0.0840732	-0.0799873	-0.0894619	-0.0602096	-0.0705703	0.119241	0.25122	0.0808122	-0.0293592	-0.422677	0.155239	-0.012562	-0.241375	0.281863	-0.326785	0.321695	0.00449114	-0.114838	-0.00747002	0.0561803	0.052882	-0.0301119	-0.0750536	-0.00983656	0.0694131	0.0492993	-0.0471208	-0.0807526	0.00450775	0.0823978	0.042206	-0.0663028	-0.0835835	0.0221626	0.0944321	0.0310049	-0.0872336	-0.0826263	0.0429827	0.104696	0.0151217	-0.109254	-0.0769529
0_22.351	0.14348	0.105852	-0.033902	-0.447847	-0.0710218	0.0770173	-0.0806972	0.0663106	-0.140832	0.0593412	0.389429	0.0500764	0.116493	-0.0763503	-0.0479708	-0.0510139	-0.129342	-0.201088	-0.0209544	-0.135603	0.207697	0.0527027	-0.00707616	-0.0239963	0.167562	0.152187	-0.0729283	-0.184334	-0.0265589	0.128787	0.08761	-0.0714477	-0.116942	0.00304542	0.094422	0.0457883	-0.0612966	-0.0717489	0.0159845	0.0663894	0.0203192	-0.0485992	-0.0421681	0.0198026	0.0448677	0.00588387	-0.036455	-0.0233535
Rnaseh2c_574.719	0.0362255	0.208116	0.00794434	-0.356761	-0.0244296	-0.130025	-0.201485	0.0785262	-0.0779517	0.00583976	0.201401	-0.145337	0.147842	-0.129794	0.321565	0.571705	-0.116307	-0.419582	-0.426228	-0.0332239	-0.233255	0.0561425	0.162858	0.0642422	0.00326163	0.00169959	-0.00234693	-0.0031864	0.000493003	0.00358723	0.00166976	-0.00270328	-0.00337191	0.000748469	0.00393296	0.00161593	-0.00309534	-0.00355417	0.00104262	0.00429869	0.00153426	-0.00352535	-0.00373055	0.00137929	0.00468406	0.00142055	-0.00399555	-0.00389799
Dhh_161.138	0.0107296	0.0175108	-0.00414769	-0.216265	0.122196	0.0382967	-0.112726	0.262238	-0.260513	-0.216219	0.297128	-0.0538043	0.0771071	-0.00284567	-0.359209	0.218237	0.137761	-0.093689	-0.115253	0.235064	-0.33764	0.0702504	0.0330372	-0.00359725	0.0342875	0.0453384	-0.0102071	-0.0507062	-0.0156063	0.0398339	0.0351871	-0.0211589	-0.0459499	-0.00268074	0.04186	0.0240305	-0.0291176	-0.0386857	0.00847136	0.0407469	0.0127602	-0.033926	-0.0298094	0.0173669	0.0370189	0.00216422	-0.0356811	-0.0201929
Tmem256_2421.021	-0.0056181	0.187257	-0.108322	0.00504217	-0.079124	-0.156842	-0.0346871	-0.0286817	0.03183	-0.119304	0.0431779	0.0318688	0.084336	0.0896037	0.160109	0.35472	-0.154105	-0.286273	-0.0777156	-0.199756	-0.106327	0.0754487	0.0753669	0.06305	0.0756982	0.0494994	-0.0626205	-0.104037	0.00909856	0.121769	0.0693678	-0.111671	-0.164197	0.0291544	0.192874	0.0945924	-0.19906	-0.260247	0.0689351	0.299657	0.124403	-0.359337	-0.417224	0.142604	0.454447	0.155467	-0.674439	-0.68636
Mdh1_13736.457	0.0313066	-0.00271445	-0.0131256	-0.0211477	-0.0362661	0.0350017	0.0285963	-0.0812772	-0.00212881	-0.0383978	0.0436974	0.0719308	0.00141235	0.0531331	-0.0111092	0.00400518	-0.000978916	-0.106747	0.00929794	0.0178036	-0.035727	0.0127783	0.0337198	-0.0059723	0.016993	0.0125796	-0.0102294	-0.0189401	-0.000438214	0.018877	0.0113786	-0.0129022	-0.0192363	0.00210453	0.0206216	0.00980841	-0.0156528	-0.0191903	0.00491083	0.0221768	0.00785356	-0.0184367	-0.0187612	0.00795707	0.02349	0.00550402	-0.0212031	-0.0179112
Zwint_7010.276	0.00381701	0.0378387	0.0572513	0.0217711	-0.0989203	-0.0791346	-0.0507576	-0.023848	-0.0551508	0.0124568	0.00636355	0.037666	0.0433243	-0.00278158	0.169152	0.190294	-0.0386484	-0.0727887	-0.0645417	-0.154816	-0.134425	-0.0132185	0.0373367	0.114655	0.039158	0.0162839	-0.027715	-0.031992	0.00690192	0.033353	0.0134958	-0.0237426	-0.026934	0.00619372	0.0283963	0.0111747	-0.0203387	-0.022678	0.00554127	0.0241669	0.00924398	-0.0174217	-0.0190955	0.00494397	0.0205603	0.00763944	-0.0149217	-0.0160792
Elac1_25.138	0.14465	-0.204679	-0.113507	0.00939365	0.00470735	-0.0898569	0.12492	0.0754964	-0.145083	-0.224517	0.0436868	-0.0205711	0.577283	-0.0298445	-0.921923	-0.10486	0.546844	-0.0179274	0.0782721	-0.184934	-0.0441721	-0.0695681	-0.0324966	0.0262276	0.00797165	0.00515567	-0.00532898	-0.00868879	0.000384493	0.00934515	0.00524463	-0.0067394	-0.00963697	0.00129763	0.0108804	0.00521374	-0.00839861	-0.0106075	0.00245643	0.0125841	0.00502669	-0.0103375	-0.0115797	0.00390397	0.0144606	0.00464027	-0.0125886	-0.0125266
Ddah1_83.07	0.293545	0.0248344	-0.32377	-0.190916	-0.342307	0.232241	0.0876218	-0.044159	0.021451	-0.276899	0.324026	0.149348	0.0633321	0.077784	0.0160368	0.039322	-0.298349	-0.0117935	-0.0489748	-0.484736	0.109168	0.236287	0.0550827	-0.0529444	0.00573872	0.00925115	-0.00125049	-0.0108482	-0.00449612	0.00933535	0.00993833	-0.00482983	-0.0135607	-0.0020485	0.0135602	0.00958157	-0.00969721	-0.0158145	0.00202955	0.0181533	0.00765692	-0.0158694	-0.0170282	0.00803641	0.0226637	0.0035708	-0.0231828	-0.0164517
Eif2a_667.916	0.0185908	0.16745	-0.0632342	-0.126586	-0.0217326	-0.0631247	-0.184185	0.0323542	0.0949168	-0.170338	0.131031	0.0473107	-0.0490978	0.046428	0.255832	0.115636	0.134348	-0.217025	-0.250504	-0.00169343	-0.208011	0.00327842	-0.00520479	0.166383	0.0449217	0.0165149	-0.0340877	-0.0372441	0.00972795	0.0408361	0.0160559	-0.0302369	-0.0344051	0.00782163	0.0370895	0.0155344	-0.0267884	-0.0317523	0.00617328	0.033657	0.0149659	-0.0237024	-0.0292771	0.00475342	0.0305154	0.0143633	-0.0209427	-0.0269708
Slc9a3r1_4082.325	-0.0790247	0.0294901	-0.00318598	0.115621	-0.00073258	0.0606356	0.0158327	-0.0828536	-0.141596	-0.0488496	-0.105131	-0.021291	-0.0501544	0.00168056	0.25643	0.264997	0.0562031	-0.173915	-0.0421357	-0.149158	-0.13237	0.0119872	0.097258	0.0182993	0.00075479	0.000363975	-0.000668569	-0.000898431	0.000198794	0.0012258	0.000595264	-0.0010833	-0.00146268	0.000317383	0.00199051	0.000973425	-0.00175543	-0.00238156	0.000506535	0.00323172	0.00159161	-0.00284493	-0.00387842	0.000808115	0.00524543	0.0026019	-0.00461163	-0.00631807
4833439L19Rik_5410.748	-0.00272886	0.0190405	0.00987226	0.0179171	-0.0815676	0.048312	-0.0130901	-0.0967913	-0.0675324	0.0616426	0.147308	0.0552634	0.0121046	-0.0831195	-0.0782907	0.0335063	-0.0426703	0.0180761	0.0559889	0.0023851	-0.0619178	0.019945	-0.028509	0.0278007	0.0472893	0.0449449	-0.0197072	-0.0528639	-0.00970557	0.0415103	0.0307706	-0.0220221	-0.0404351	-0.00122563	0.0352031	0.0198468	-0.0220143	-0.0300642	0.00412076	0.0289673	0.0116903	-0.0205571	-0.0216507	0.00717798	0.0231778	0.00581171	-0.018294	-0.0150024
Wrn_91.727	0.0290502	0.0091667	-0.294605	0.299727	-0.29188	0.0509042	0.169206	0.136002	-0.17873	-0.012588	0.0158104	-0.124317	0.174578	0.0572773	-0.0920805	-0.575435	0.264478	0.000649233	0.0333397	0.0765117	-0.14598	0.19057	0.128946	-0.232048	0.0292361	0.0548932	-0.00284725	-0.0654239	-0.0315919	0.0535484	0.0628389	-0.0265515	-0.0884844	-0.0169313	0.0842026	0.0640044	-0.0628821	-0.110247	0.0114918	0.119551	0.0532114	-0.114323	-0.124886	0.0571132	0.156087	0.0235136	-0.182218	-0.123733
Nek8_458.683	0.0360664	0.0214988	0.196641	-0.199841	-0.0204196	-0.107438	-0.181173	-0.104781	-0.0284691	0.0187454	-0.0368021	0.102638	0.164812	0.0738036	0.157641	0.224838	0.198996	-0.283801	-0.310102	-0.247833	-0.200725	0.146273	0.0102016	0.157301	0.0323235	0.0444488	-0.0122381	-0.0614828	-0.0208381	0.0576014	0.0573747	-0.0355051	-0.0921396	-0.0107208	0.0955479	0.0683962	-0.0774896	-0.132167	0.015182	0.14943	0.0718396	-0.149868	-0.180283	0.0672428	0.221501	0.0571848	-0.271741	-0.230159
Inpp5f_62.695	-0.193983	0.108873	-0.0240664	0.0168127	0.133955	0.18378	-0.0188874	-0.103827	-0.514936	0.0588553	0.231067	0.173771	-0.0492078	0.00353372	-0.177964	-0.11997	-0.0573186	-0.208403	-0.0673927	0.325402	0.327216	-0.049775	-0.148962	-0.10656	0.0769092	0.0966367	-0.0255923	-0.11859	-0.0363301	0.0918164	0.0844883	-0.0489978	-0.117846	-0.0127002	0.102869	0.0684408	-0.0708503	-0.111703	0.0113794	0.109626	0.0490374	-0.0900665	-0.100432	0.0348566	0.111802	0.0269774	-0.105638	-0.0845797
Yme1l1_331.125	0.0314413	-0.0147439	-0.111649	-0.0330504	0.107185	0.00700442	0.0442252	0.08161	-0.22182	0.0178101	0.0907917	0.114769	-0.0880832	-0.0728733	-0.324692	0.259134	0.0725897	-0.0624692	0.0134225	0.0285275	-0.0104236	-0.00403914	-0.00523758	-0.0223827	0.0378162	0.0178696	-0.0273687	-0.0351151	0.00559479	0.0375773	0.0178251	-0.0271478	-0.0349319	0.00548944	0.0373398	0.0177806	-0.0269285	-0.0347495	0.00538514	0.0371036	0.0177358	-0.0267107	-0.0345679	0.00528187	0.0368688	0.0176908	-0.0264945	-0.034387
Dnajc5_1028.585	0.0284062	0.0754517	-0.103551	-0.0834122	0.0154268	0.0345633	-0.0119753	0.040923	-0.016799	-0.195361	0.0476218	0.057709	0.0543253	0.133741	-0.110962	-0.00400337	0.149848	-0.0513553	0.0260249	-0.360748	0.0903603	0.101412	-0.0644831	0.0514561	0.0622738	0.0587923	-0.0314	-0.0819249	-0.0138351	0.0722673	0.0556686	-0.0443868	-0.0860807	-0.00299698	0.0819632	0.0506372	-0.0584101	-0.0886294	0.00953267	0.0910847	0.0435055	-0.0732812	-0.0892404	0.0236705	0.0993304	0.0340944	-0.0887512	-0.0875887
Tor1aip2_4498.725	-0.0380671	0.0806807	-0.0443946	0.00843426	0.0447382	0.0355035	-0.0213468	-0.100435	-0.137679	-0.0423857	0.0810232	0.0784605	0.04017	0.00667199	0.0811879	0.0822232	-0.0781848	-0.0142216	-0.0597431	-0.075393	-0.0249506	0.0255644	0.0107083	0.0303438	0.050427	0.0160648	-0.0385346	-0.0392332	0.0115481	0.0427837	0.0159867	-0.0310141	-0.0344868	0.00757106	0.0361534	0.0155139	-0.0248124	-0.0301714	0.00450625	0.030428	0.0147695	-0.0197159	-0.0262794	0.00218035	0.0255056	0.0138488	-0.0155436	-0.022794
Rtel1_169.162	0.0576981	0.159727	-0.0138336	-0.340489	-0.0616062	-0.116245	-0.0370777	0.262338	-0.0348018	0.0162777	0.0305271	-0.0854845	0.140085	0.0735962	-0.12796	0.0696825	0.266031	-0.241339	-0.254619	-0.0143857	-0.137165	0.0610387	0.209333	-0.0719359	0.000529407	0.000925285	-6.41441e-05	-0.00100307	-0.000463851	0.000803731	0.000910795	-0.000359119	-0.00114416	-0.000229748	0.00107503	0.000809628	-0.000696985	-0.0012171	8.51835e-05	0.00131784	0.000608786	-0.00105795	-0.00119776	0.000472907	0.00150277	0.000301002	-0.00141501	-0.00106431
Esf1_521.816	-0.0231789	-0.0223206	0.0160775	-0.207479	0.0821911	-0.106906	0.072322	0.144573	0.133115	0.0545077	-0.0281734	-0.0233452	0.0495655	0.0314046	-0.400411	-0.722572	0.0893484	0.115813	0.298542	0.154654	0.157723	0.205102	-0.240813	-0.177002	0.000932122	0.0014311	-0.000289925	-0.00190659	-0.000766832	0.00185808	0.00201861	-0.00106842	-0.00307803	-0.000509855	0.00342316	0.00262633	-0.00261346	-0.00472558	0.000396152	0.00593786	0.00300793	-0.00545455	-0.00685986	0.00258016	0.00977589	0.00262339	-0.0103844	-0.00928319
Cds2_60.464	0.0650274	-0.0965068	-0.0292183	-0.0122539	-0.0966505	0.0305829	0.0296188	0.00167031	0.0076654	-0.0612614	0.0813946	0.1129	0.0616987	-0.0404658	-0.71419	0.342058	0.0836787	0.0949542	-0.0431379	-0.390888	0.299378	0.0600087	0.0363599	-0.131817	0.0101334	0.0129434	-0.00419494	-0.017859	-0.00566572	0.0173523	0.0169302	-0.0103781	-0.0263784	-0.00343667	0.0283436	0.0209201	-0.0211901	-0.0377395	0.00249591	0.0444989	0.0237835	-0.0392726	-0.0521376	0.014886	0.0673912	0.0233372	-0.0685368	-0.0690906
Dapp1_248.971	0.0389321	-0.129496	0.0821401	0.031375	-0.0672469	0.110632	-0.0191588	-0.0991207	0.0278135	-0.126537	0.00406677	-0.00698454	0.131335	0.0458005	-0.27517	0.295573	0.0397174	-0.0667059	-0.012433	-0.113919	-0.0574857	0.0347244	0.0290605	0.00678296	0.00405007	0.00886238	0.000425885	-0.0087696	-0.00487653	0.00632584	0.00810244	-0.00226579	-0.0093687	-0.00246164	0.0081397	0.00660803	-0.00487211	-0.00917365	0.000259068	0.00931755	0.00447795	-0.00716156	-0.00817019	0.00306005	0.00973329	0.00187002	-0.00892013	-0.00641509
Prkd3_573.144	0.094745	-0.0731606	0.0282453	-0.153484	0.0465082	-0.0585898	0.00282699	0.0157883	0.0353027	0.00704485	0.0415127	0.16948	-0.00996983	-0.136358	-0.21141	0.208816	-0.0272696	-0.0309169	-0.0835299	-0.0376967	0.139366	-0.0301707	0.0118553	-0.0233917	0.0317101	0.0210712	-0.0205765	-0.035234	-0.000115173	0.035881	0.0223682	-0.0242865	-0.03896	0.00146306	0.0405286	0.0236417	-0.0285563	-0.0430142	0.00341223	0.045698	0.0248661	-0.0334624	-0.0474156	0.00579373	0.051437	0.0260104	-0.0390909	-0.0521828
Abhd17a_3229.059	-0.0109254	0.116122	0.0920061	-0.204276	-0.0170142	-0.0211708	-0.0690327	-0.0429424	-0.151645	-0.00904712	0.0405028	0.0170733	0.126772	0.0158561	0.191889	0.351587	-0.109216	-0.159752	-0.222361	-0.120358	-0.132279	-0.00745018	0.0588726	0.122331	0.0222563	0.0353985	-0.00311735	-0.0367358	-0.0158786	0.0266454	0.0289214	-0.0109057	-0.0342889	-0.0070755	0.0288216	0.0217523	-0.0168908	-0.0302156	0.000739297	0.0290077	0.0144023	-0.0209862	-0.0250143	0.00727533	0.0275003	0.00732024	-0.0232327	-0.0191715
Tspan9_237.843	0.106284	0.0851115	0.00713854	-0.637213	0.216749	0.155844	-0.115989	0.040726	-0.195586	-0.215021	0.131822	0.108248	0.165321	-0.13093	-0.18873	0.564324	0.0684915	-0.0437653	-0.175152	-0.457932	-0.115269	-0.0105336	0.0183404	0.17255	0.0415666	0.0265936	-0.0279088	-0.0461673	0.00078085	0.0474814	0.0289397	-0.0329403	-0.051943	0.00248439	0.0541744	0.0314103	-0.038805	-0.0584	0.00462618	0.0617372	0.0339945	-0.0456359	-0.0656139	0.0072897	0.0702704	0.0366767	-0.0535879	-0.0736676
Tmem248_741.719	0.0381438	-0.112185	0.0956477	-0.168469	0.095662	0.141578	0.0395531	-0.0425982	-0.20143	0.0475531	-0.0612022	0.0536842	-0.069176	-0.0745959	0.0290117	0.315564	-0.118646	0.0542431	-0.0901243	-0.068111	-0.00542676	-0.0138913	-0.0301006	0.0474526	0.060881	0.0325374	-0.0431639	-0.0611883	0.00572604	0.0629408	0.0339278	-0.0444963	-0.0635372	0.00563338	0.0650675	0.0353744	-0.0458684	-0.0659767	0.00552676	0.067263	0.0368792	-0.0472814	-0.0685106	0.00540528	0.0695295	0.0384445	-0.0487363	-0.0711426
Ranbp9_1195.72	0.0115383	0.0270733	-0.0863767	-0.0717726	0.109498	-0.0649539	0.0726184	0.00300227	0.022124	-0.160801	0.159677	0.0969278	0.0109777	-0.010724	-0.324263	-0.122007	0.15046	0.073161	-0.00627476	0.0501	0.0583461	0.00208286	-0.0847153	-0.00266866	0.00923007	0.0150044	-0.0016581	-0.0172013	-0.00763054	0.0141056	0.0158646	-0.00647	-0.0208166	-0.00442594	0.0196228	0.0155082	-0.0127007	-0.0238756	0.000570414	0.0255029	0.0134528	-0.0203386	-0.0258266	0.00760236	0.0313178	0.00917366	-0.0292237	-0.0259961
Bscl2_287.559	-0.057207	0.154793	-0.0631669	-0.0893747	-0.0712366	0.084274	0.013729	0.0243365	0.0486438	-0.0705828	0.100632	0.017624	-0.0045841	-0.195719	-0.0851433	0.0432616	-0.0026372	0.127595	0.0918201	-0.0494236	-0.0526963	-0.000333792	-0.039178	0.0229106	0.0293835	0.0746559	0.00883451	-0.0716555	-0.0435716	0.0459302	0.0631153	-0.0136079	-0.0708909	-0.0210007	0.055714	0.0473184	-0.031774	-0.0634272	-1.86235e-05	0.0589101	0.0292504	-0.0444394	-0.0510214	0.0176831	0.0562116	0.0108677	-0.0510889	-0.0356611
Slc35a1_2222.813	0.030182	0.0266335	0.00546993	-0.131105	0.0518499	-0.104243	0.0503023	0.0586877	0.0525637	-0.166898	0.0674965	0.0318031	0.06126	-0.0491942	-0.0637546	0.0771112	0.0574773	-0.0383998	0.0391024	-0.0171809	-0.20233	0.0561753	0.026488	0.032014	0.0211774	0.0192833	-0.0132544	-0.0321013	-0.00447629	0.0348313	0.0276528	-0.0246753	-0.0500283	-0.00208481	0.0565765	0.038885	-0.0447463	-0.077553	0.00458649	0.0906782	0.0533572	-0.0797511	-0.119726	0.0195157	0.143163	0.0709224	-0.140847	-0.184421
Pbx2_468.187	-0.0372406	0.0414966	-0.025069	0.0407195	-0.0131263	-0.0119476	0.00533957	-0.126142	-0.00942229	-0.153907	0.111522	0.20847	0.121704	0.129493	-0.459648	-0.132492	0.203745	0.0314299	-0.0519585	-0.0973805	0.019086	0.124331	0.00761723	-0.072386	0.0238242	0.0371221	-0.0049041	-0.0435767	-0.0186224	0.0352423	0.0389872	-0.016394	-0.0522143	-0.0109669	0.0479959	0.038165	-0.0311412	-0.0596148	0.000652078	0.0614907	0.0336481	-0.0491886	-0.064578	0.016698	0.0748559	0.0243216	-0.0702929	-0.0656458
Cyb5b_3625.786	-0.0421179	0.103571	-0.018182	-0.0471304	-0.116905	0.117925	0.0517341	-0.0447575	-0.149986	0.0412437	0.0787016	0.0875107	-0.0323856	-0.0877157	-0.091214	0.208139	-0.0322395	-0.0819009	0.0337586	-0.0881561	0.0659579	-0.00144023	-0.031358	0.018218	0.0508422	0.0869632	-0.00329992	-0.0902191	-0.0425555	0.0607536	0.0703642	-0.0223619	-0.0827548	-0.0203776	0.0650247	0.0526749	-0.0364308	-0.0716208	-0.00160581	0.0645536	0.03514	-0.0455338	-0.0583017	0.0133622	0.0603081	0.0187845	-0.05003	-0.0441067
Dda1_1594.617	0.0393606	0.00713743	0.0660168	-0.155022	-0.107716	-0.00372991	-0.00609081	0.051341	0.036228	-0.021192	0.105899	0.0105549	0.201664	-0.0492063	-0.244983	-0.146438	-0.00603119	0.139977	0.0804426	-0.283051	0.12614	0.121867	-0.00654033	-0.0665733	0.0189424	0.0179365	-0.0112666	-0.0290429	-0.00501445	0.0308167	0.0257	-0.0207579	-0.0448723	-0.00367694	0.0495758	0.0362322	-0.0372412	-0.0690103	0.000768957	0.0788143	0.0500834	-0.0656191	-0.10576	0.0112902	0.12365	0.0675379	-0.11439	-0.16179
Slc25a10_1343.293	-0.11049	0.0516252	0.159975	-0.0816087	-0.0467719	0.135167	-0.0108036	-0.156881	-0.104186	-0.0833859	-0.126783	-0.0862726	-0.0367823	-0.122759	0.47096	0.449024	-0.0253954	-0.105445	-0.12398	-0.186787	-0.268359	-0.0867902	0.0556036	0.167806	0.00311516	0.0112651	0.00240576	-0.0117605	-0.00899607	0.0086758	0.0148312	-0.00210022	-0.0183481	-0.00726345	0.0170007	0.0172734	-0.0104748	-0.0257116	-0.0015106	0.0281898	0.0167125	-0.0239886	-0.0322619	0.0103883	0.0415565	0.0103175	-0.0435872	-0.0350519
Vma21_920.345	-0.0562663	0.029906	-0.0336236	-0.0663817	0.0382721	0.00615459	0.111491	0.025881	0.0522522	-0.121629	0.0214452	-0.00590318	0.134444	0.0759962	-0.516575	-0.0193367	-0.117498	0.0554213	-0.0155291	0.24486	0.0572521	0.203586	-0.076055	-0.191983	0.0123404	0.00827669	-0.00756676	-0.0131943	-0.000385176	0.0131237	0.00849576	-0.00824208	-0.0138396	-9.28842e-05	0.0139492	0.00870958	-0.00896529	-0.0145091	0.000233005	0.0148189	0.00891678	-0.00973933	-0.0152033	0.000595143	0.0157346	0.00911587	-0.0105673	-0.0159226
Kat7_571.233	-0.00758911	-0.044033	0.101255	-0.112472	-0.0795151	0.160484	-0.0151995	0.0401038	-0.146822	0.182183	0.0549868	0.00632451	-0.13525	-0.207403	-0.0931544	0.193374	0.0129734	-0.0255543	0.0206319	0.0383388	0.0655112	-0.0370383	-0.0315417	-0.0218528	0.0301071	0.0281339	-0.0148145	-0.038794	-0.00744039	0.0349406	0.028438	-0.0198273	-0.0421513	-0.00421958	0.0401023	0.0282551	-0.0255322	-0.0453902	-0.000244129	0.0455607	0.0274855	-0.0319683	-0.0484193	0.00456294	0.0512726	0.0260189	-0.0391691	-0.051132
Zfp54_276.566	0.0790476	0.00312618	-0.0815994	0.00904124	-0.00628836	-0.341927	0.0658781	-0.237857	0.205627	-0.126241	0.0734535	0.119371	0.400091	0.173052	0.0446593	-0.877785	0.118117	-0.120652	-0.0950785	0.260511	-0.0597075	0.0500713	-0.107151	0.0255573	0.00802408	0.021603	0.00299613	-0.0200149	-0.0129606	0.0130018	0.0190888	-0.00320669	-0.0206256	-0.00712957	0.0164584	0.0151969	-0.00863183	-0.0194473	-0.00122342	0.0182453	0.0103613	-0.0128835	-0.0167355	0.00425746	0.0183617	0.00505957	-0.0156971	-0.0128559
Ptpn13_27.672	0.00103089	-0.119126	-0.0102455	-0.0178551	0.184602	0.144149	-0.0326038	-0.0359283	-0.0386085	-0.000479053	-0.234378	-0.0262964	0.0457583	-0.0399548	-0.0333507	-0.0286467	-0.0239874	0.309034	0.0959507	-0.10932	0.00833103	-0.228575	0.0337549	0.0489361	0.0150155	0.0449227	0.00750489	-0.046351	-0.0324446	0.0323594	0.0510836	-0.00831011	-0.0621389	-0.0230641	0.0530748	0.0522327	-0.0311717	-0.0758959	-0.00527168	0.07553	0.0456318	-0.0611973	-0.0841689	0.0220501	0.0971053	0.0282418	-0.0973601	-0.0826489
Fbxo21_195.049	-0.124144	0.0727921	0.194315	-0.537268	0.0845596	0.232963	0.145349	0.141438	-0.0963705	-0.152907	-0.0770092	0.0098267	-0.000422716	-0.335703	-0.427853	0.482565	-0.064645	0.246383	-0.0441165	-0.187417	0.228974	-0.0530901	-0.0708784	-0.0708735	0.0786281	0.135742	-0.00831487	-0.167885	-0.0813352	0.12209	0.148383	-0.0518361	-0.212102	-0.0555946	0.172246	0.152275	-0.112869	-0.255251	-0.0126529	0.227078	0.142927	-0.195009	-0.291296	0.0497898	0.283534	0.114621	-0.30196	-0.311716
Hsd17b4_2254.387	-0.0383655	0.00129414	0.0571123	0.0368357	-0.0337839	0.0447334	0.0210461	-0.147158	-0.079582	0.0107725	0.0203512	0.0574652	-0.0684575	-0.0022778	-0.00364493	0.289496	-0.0850894	-0.0206557	-0.0325385	0.000154502	-0.137303	-0.0237853	0.00697567	0.0684176	0.0143347	0.0234599	-0.0014183	-0.0238171	-0.0111697	0.0168569	0.0195966	-0.00597011	-0.0224047	-0.00601329	0.0182081	0.0154146	-0.00955158	-0.0201631	-0.00138808	0.0185091	0.0111541	-0.0121407	-0.017328	0.00257587	0.0179086	0.00702366	-0.0137663	-0.0141261
Snrk_2345.405	0.079311	-0.00725153	0.0807527	-0.100355	-0.107028	-0.00948559	-0.0379321	-0.122981	-0.214474	0.168391	0.102983	0.0892068	0.0316042	0.0157407	0.0921779	0.240429	-0.0280264	-0.102862	-0.142003	-0.191544	-0.0755556	-0.0532615	0.0310684	0.152622	0.0238645	0.0229971	-0.0112831	-0.0311995	-0.0067257	0.0278865	0.0236044	-0.0152177	-0.0342377	-0.0044269	0.0322562	0.0238766	-0.0197566	-0.0372769	-0.00151771	0.0369643	0.023732	-0.0249494	-0.0402544	0.00207959	0.0419927	0.0230779	-0.0308443	-0.0430936
Xxylt1_112.837	-0.0961337	0.186303	0.0712148	-0.447183	-0.080579	0.0865964	0.271466	0.215087	-0.412938	0.110518	-0.0337692	-0.044943	0.117966	-0.408717	-0.260196	0.493039	-0.160074	0.150414	-0.0845268	0.231041	-0.341584	-0.0297574	0.032775	-0.00572644	0.100192	0.202562	0.0120564	-0.215571	-0.118	0.126699	0.165054	-0.0372486	-0.19759	-0.0602308	0.1384	0.124328	-0.0736881	-0.169313	-0.0131093	0.138151	0.083631	-0.0970075	-0.135596	0.02305	0.128724	0.0456767	-0.10814	-0.100434
Slc22a18_651.113	-0.0934218	0.102566	0.136471	0.0407543	-0.143074	0.0188714	-0.128542	-0.320259	-0.250772	0.16958	0.0898441	0.220232	-0.0743904	-0.139677	0.284163	0.360876	-0.0406085	-0.155379	0.0755816	-0.526258	-0.113961	-0.0618255	0.0531789	0.182775	0.00219819	0.00215965	-0.00101401	-0.00287413	-0.000654258	0.00261601	0.00224919	-0.00139937	-0.003199	-0.00044442	0.00308029	0.00230736	-0.00185263	-0.0035315	-0.000168143	0.00359193	0.0023244	-0.0023807	-0.00386549	0.000185369	0.00415093	0.00228903	-0.0029905	-0.00419314
Pm20d1_27.994	-0.486314	0.567591	-0.230899	0.201398	0.0114728	0.0476476	-0.0836806	-0.270115	-0.155926	-0.181956	0.0821712	0.401343	0.0285631	-0.0838103	-0.35227	-0.0977992	-0.265291	0.223683	-0.0740825	0.225787	-0.159728	0.528989	-0.551999	0.0124433	0.120315	0.18446	-0.0248015	-0.249377	-0.107993	0.179109	0.20708	-0.0834008	-0.323233	-0.0791419	0.24946	0.221835	-0.170058	-0.40572	-0.0271765	0.330134	0.223263	-0.295519	-0.491508	0.0528301	0.418702	0.203813	-0.47615	-0.570151
Wbp1l_1932.731	0.123073	0.0356676	0.0127909	-0.130908	-0.158572	-0.0740904	-0.00350103	-0.171167	0.00822991	0.107182	0.137638	0.154045	0.0956587	-0.0229665	0.0490754	0.132312	-0.0890632	-0.167818	-0.111353	-0.1509	-0.0138212	0.0178196	0.0697246	0.0621531	0.022787	0.0220791	-0.0104461	-0.0293442	-0.00655191	0.0257504	0.0219691	-0.0136369	-0.0311444	-0.00433681	0.0288136	0.0215592	-0.0171299	-0.0328037	-0.00174173	0.0319519	0.0208101	-0.0209255	-0.0342789	0.00125425	0.035136	0.0196806	-0.0250201	-0.0355225
Eif2s2_3568.163	-0.154816	0.030877	-0.212984	-0.00947722	0.170453	0.0997163	0.182731	0.218728	0.129127	-0.213434	-0.105234	-0.20572	-0.138726	-0.00833652	-0.500835	-0.606114	0.301011	0.338273	0.256793	0.17246	0.11573	0.0971008	-0.113395	-0.297774	0.00303604	0.00425342	-0.000900917	-0.00534124	-0.00214447	0.00472828	0.00520902	-0.00224583	-0.00722494	-0.00174142	0.00706958	0.0061442	-0.00434258	-0.00953472	-0.000744209	0.0102273	0.00689979	-0.00748402	-0.012263	0.00117589	0.0143789	0.00721491	-0.0120436	-0.0153309
Cdc42bpa_164.73	0.16693	-0.342917	0.112532	-0.0974673	0.0484374	0.1347	0.0483069	0.134741	-0.528812	0.233517	-0.141073	0.205135	-0.203956	0.013636	-0.0454399	0.146461	0.0184097	-0.00544652	0.0065536	-0.144271	0.113412	-0.123485	-0.0775169	0.0857829	0.0233976	0.030484	-0.00670853	-0.035981	-0.0134614	0.0286456	0.0299972	-0.0125318	-0.0388452	-0.00906583	0.0338936	0.0285981	-0.0189373	-0.0410532	-0.00374597	0.0389977	0.0261809	-0.0258388	-0.0424362	0.00248477	0.043797	0.0226497	-0.0331208	-0.0428238
BC057675 /// Gm20186_1765.883	-0.187376	0.100098	-0.00616732	-0.135715	-0.00953059	0.51163	-0.0147959	-0.0598759	-0.367972	0.0787191	0.0457371	-0.00422354	-0.251483	-0.31543	-0.0878185	0.268103	0.106529	-0.0493024	0.390533	-0.382244	0.156327	0.00825063	-0.176356	0.000655227	0.125339	0.0667539	-0.0901434	-0.129675	0.00830319	0.123844	0.0722611	-0.0844986	-0.132294	0.00148896	0.122038	0.0775618	-0.0786518	-0.134554	-0.00535877	0.119925	0.0826446	-0.0726207	-0.136449	-0.0122223	0.117508	0.0874986	-0.0664235	-0.137971
Snx6_2264.407	-0.0415419	0.0655584	0.0641181	-0.0456961	-0.0423126	0.0362295	-0.00229099	-0.142278	-0.0326012	0.026285	-0.048075	-0.00588443	0.0887086	-0.0146808	0.11483	0.200878	-0.0358594	-0.0782353	-0.0645878	-0.074345	-0.139782	-0.00219264	0.0739559	0.0488878	0.0165156	0.011736	-0.0102462	-0.0191979	-0.00125805	0.0194072	0.0137202	-0.0121083	-0.0225578	-0.0013969	0.0228008	0.0160374	-0.0143098	-0.026511	-0.00154585	0.026782	0.018743	-0.0169133	-0.0311639	-0.00170419	0.0314504	0.0219009	-0.019993	-0.0366436
Uba3_5095.893	-0.0495976	0.0280767	0.0183208	-0.0303853	-0.0224775	0.00703963	-0.0147532	0.0198899	0.0461107	0.0897071	0.0277256	-0.057683	0.0427569	0.0557161	-0.259958	-0.322393	-0.00291448	0.184547	0.0628173	0.176056	0.027452	0.0420981	-0.111592	-0.0517152	0.000932619	0.00162849	-0.000152405	-0.00207686	-0.00106719	0.00188131	0.00243246	-0.000822748	-0.0034639	-0.00108686	0.00355145	0.00346395	-0.00223738	-0.00558139	-0.000640161	0.00638053	0.00463025	-0.00499414	-0.00867964	0.000846708	0.0110026	0.00562258	-0.01008	-0.0129769
Nkap_108.972	0.0807448	0.00205975	-0.151614	-0.070659	-0.14579	0.0538112	0.036235	0.000762541	0.0547525	-0.0725952	-0.113331	0.21257	0.481872	0.0063455	-0.882594	-0.111786	0.234029	-0.0431588	-0.086888	-0.0944068	0.290057	0.0725744	-0.0387954	-0.141607	0.0367404	0.0215893	-0.0296192	-0.0471645	0.0027184	0.0562266	0.0362121	-0.0436282	-0.0756878	7.63228e-06	0.085522	0.060069	-0.0639638	-0.121854	-0.00661725	0.129069	0.0984592	-0.0933313	-0.197611	-0.0207465	0.192831	0.159149	-0.135526	-0.325139
Hoxd8_182.396	0.0854218	0.113961	0.155011	-0.848847	0.170855	-0.0791884	0.125571	-0.0464614	0.0596375	0.0568755	0.0611621	0.152503	0.164017	0.077633	-0.740369	0.151129	-0.106678	0.0456645	0.0325719	-0.00162672	-0.0550269	-0.00169531	0.00366986	-0.0172435	0.149184	0.183318	-0.0453769	-0.235515	-0.0804027	0.160434	0.162728	-0.0717884	-0.22546	-0.049284	0.167837	0.140592	-0.0950715	-0.211698	-0.0203416	0.171615	0.117374	-0.114912	-0.194895	0.00612897	0.172018	0.0935387	-0.131093	-0.175722
Ddx20_436.823	-0.00150705	-0.0738549	0.0204945	-0.115213	0.200821	0.0487972	-0.0610344	0.163402	-0.0335278	-0.128955	-0.0606336	-0.100769	0.0655977	0.0027601	-0.128387	-0.0198572	0.0148288	0.203451	0.0150651	0.0771276	-0.0853861	-0.116976	0.0435442	-0.00558774	0.00186211	0.00295399	-0.000362752	-0.00354441	-0.0016687	0.00300235	0.00363442	-0.00124855	-0.00483468	-0.00142667	0.00458761	0.00429259	-0.00265194	-0.00640526	-0.000766543	0.00672642	0.00480784	-0.00477043	-0.0082352	0.000543613	0.00952752	0.00498493	-0.00784939	-0.0102456
Bcl6_597.406	0.0620805	-0.0643208	0.0600048	-0.344029	0.0572587	0.153443	0.21232	-0.067516	0.0411843	-0.0783373	-0.102891	0.143755	-0.147139	-0.227823	-0.0355556	0.154277	0.0367193	0.158889	0.0356458	-0.217275	0.0526154	0.00947562	-0.0500628	0.0132459	0.117836	0.12237	-0.0463985	-0.157871	-0.0419656	0.11609	0.105162	-0.0555301	-0.143488	-0.0256607	0.112933	0.088943	-0.0624211	-0.129215	-0.0116633	0.108626	0.073807	-0.0672952	-0.115268	0.000213655	0.103402	0.0598217	-0.0703794	-0.101816
Ddr1_956.162	0.121373	-0.0173635	0.0160334	-0.32676	0.0449842	-0.087966	-0.110654	0.152907	0.0173245	-0.188786	0.0345508	0.207607	0.0855672	-0.0417781	-0.421004	0.583782	-0.0368284	-0.16065	0.0418281	-0.629895	0.152447	0.0789012	0.0740716	-0.0099655	0.0233745	0.0447123	-0.00111594	-0.0553269	-0.0309376	0.04537	0.0619044	-0.0173256	-0.0874131	-0.029858	0.080485	0.0812469	-0.0494171	-0.13323	-0.017595	0.133606	0.0994767	-0.108721	-0.195925	0.0158194	0.209681	0.109681	-0.214672	-0.276818
Ctdsp2_643.991	0.0125845	0.0284972	-0.0418842	-0.167021	0.0273039	0.0974071	0.0642819	0.0431018	0.00996085	-0.171313	-0.0190197	0.00992491	0.129865	-0.139267	-0.304915	0.349322	0.031379	-0.0154719	0.0868897	-0.274771	0.158283	-0.0766126	-0.00603833	0.0142737	0.0331805	0.038252	-0.01502	-0.0559096	-0.0171061	0.0526038	0.0526803	-0.0293186	-0.0835282	-0.0171674	0.0820061	0.0713238	-0.0538749	-0.12418	-0.0129706	0.125697	0.0946308	-0.0954676	-0.184037	-0.000480872	0.189243	0.122496	-0.165708	-0.272591
Tarsl2_230.524	-0.0258936	-0.0142444	0.0919188	-0.425215	0.153655	0.12164	0.221241	0.155987	-0.0684744	-0.29867	-0.0877397	-0.203945	0.101314	0.00548175	-0.419168	0.285631	0.111766	0.33765	-0.10044	0.0501631	-0.349239	0.0167191	-0.0659654	0.0749351	0.105069	0.197878	0.00162584	-0.244536	-0.132436	0.160083	0.212268	-0.0544046	-0.302789	-0.0979443	0.220537	0.216033	-0.130119	-0.358191	-0.0441757	0.283774	0.205046	-0.228917	-0.403605	0.0297443	0.346427	0.174293	-0.354296	-0.429641
Rps15_17501.511	-0.0119946	0.0464023	-0.0448373	-0.0147257	0.0766361	-0.0742811	0.000305376	0.0365509	0.0388824	-0.158531	-0.063856	-0.0115108	-0.0688844	-0.00905917	0.282158	0.204855	-0.102637	-0.0273606	-0.0638356	-0.0815288	-0.0414675	-0.122007	0.0408582	0.0905572	0.0119525	0.0192638	-0.00225283	-0.0237329	-0.0114155	0.0200738	0.024783	-0.0083571	-0.0339557	-0.0103817	0.0319393	0.0306532	-0.0187414	-0.0472728	-0.00625118	0.0487217	0.0360511	-0.0355417	-0.0640003	0.00309983	0.0717053	0.039465	-0.0617726	-0.084043
Brox_1804.792	-0.0455736	0.0275295	0.0453222	-0.017794	0.00908182	0.0506185	0.000101919	-0.0831027	-0.0841258	-0.0222017	0.0786925	0.0620806	-0.0343715	-0.0666177	-0.0081519	0.0389008	0.0955779	-0.00215939	-0.0353087	0.106358	-0.141393	-0.0622551	-0.0131779	0.070757	0.0060614	0.0366794	0.0125999	-0.036665	-0.0341857	0.0237262	0.0507787	-0.000262534	-0.0611026	-0.0317201	0.0515491	0.0626411	-0.0269622	-0.0908836	-0.0158746	0.0904665	0.0661277	-0.0738539	-0.12122	0.0214253	0.138807	0.0512962	-0.147957	-0.14148
Lzic_184.652	0.0561192	0.26521	-0.0451126	-0.866436	-0.0538691	0.0569125	0.184858	0.0992542	0.434244	-0.122154	-0.00386289	0.0679639	0.0938133	-0.301391	-0.0708239	-0.648734	-0.148352	0.251281	0.192367	0.0761585	0.0427689	0.178682	-0.270814	-0.0514755	0.125167	0.230468	0.006158	-0.256665	-0.135183	0.148746	0.191819	-0.0426182	-0.235969	-0.0759251	0.159717	0.150843	-0.0799864	-0.206529	-0.02682	0.160373	0.109899	-0.105767	-0.172221	0.0121934	0.152867	0.0710086	-0.120594	-0.13626
Suv420h2_198.909	0.15638	-0.0186592	0.0158125	-0.443084	0.00988077	0.0135342	0.105997	0.0909037	-0.233829	0.032081	0.128277	0.113454	-0.0641079	-0.116513	-0.204204	0.610676	-0.041972	-0.225873	-0.202361	-0.177419	0.00791175	0.0571233	0.0631948	0.00306013	0.0637416	0.095005	-0.0106178	-0.108416	-0.0484874	0.0761385	0.0887002	-0.0276495	-0.111264	-0.032657	0.0867608	0.0800506	-0.0444606	-0.11121	-0.0158974	0.0953499	0.0691973	-0.060597	-0.108206	0.00135541	0.10169	0.0563337	-0.0755996	-0.102297
Cox15_1216.081	0.0377408	0.086096	-0.19109	0.124565	-0.386717	-0.229957	0.139212	0.152823	-0.0474929	-0.112016	0.276387	-0.123343	0.144295	0.374033	0.0758007	-1.28694	0.0869863	0.163047	0.0601864	0.0337772	-0.0102327	0.072827	0.0797766	-0.186719	0.0678712	0.0309162	-0.0631807	-0.0854906	0.0147393	0.107662	0.0619644	-0.0928647	-0.150023	0.00573966	0.167452	0.117306	-0.133072	-0.263936	-0.0209938	0.254492	0.211584	-0.184082	-0.472668	-0.0854865	0.37636	0.363898	-0.241105	-0.891862
Gm15501 /// LOC101055915 /// Rps8_20068.202	-0.0961878	0.0838261	0.0382072	-0.108731	0.138391	-0.0548484	-0.0170165	0.0678066	0.0804433	-0.1355	-0.0338474	-0.0739985	-0.186058	-0.0930865	0.26485	0.217154	-0.0937057	-0.03344	-0.046513	0.146508	-0.133538	-0.103499	0.0220245	0.0406459	0.00797624	0.0124483	-0.00195517	-0.0164579	-0.00778549	0.0149507	0.018597	-0.00664213	-0.0270437	-0.00858224	0.0269246	0.0269472	-0.0161912	-0.0435928	-0.00708992	0.0469009	0.0375972	-0.0346109	-0.0689715	-0.000247983	0.0792657	0.0498831	-0.0689654	-0.107101
Odc1_9922.441	-0.15384	-0.0985806	-0.0158743	0.126275	0.00479823	0.109431	0.113103	0.200459	0.0224328	-0.0815255	-0.0264129	-0.292011	-0.0731654	-0.0675548	-0.442116	-0.545802	0.215436	0.523281	0.0775328	0.241358	0.0662864	0.0605587	-0.132851	-0.232451	9.7427e-05	0.000237854	2.17076e-05	-0.000274057	-0.000186478	0.000221219	0.000354137	-5.94907e-05	-0.000461797	-0.0001984	0.000440437	0.000496729	-0.000240376	-0.000739645	-0.000142845	0.000807547	0.000644554	-0.000596672	-0.00112651	6.03502e-05	0.00139199	0.000741726	-0.00124523	-0.00162332
Kif1c_24.774	-0.286565	0.141514	0.095039	-0.193452	-0.00825527	0.297902	0.248776	-0.0906067	0.0481793	-0.585125	0.145775	0.00293	-0.081275	-0.175976	-0.549764	0.593874	-0.175054	-0.0356942	0.140468	0.0401289	-0.0133806	0.137287	0.0806675	-0.30062	0.0411983	0.106035	0.0154166	-0.109644	-0.0742899	0.0689219	0.10844	-0.0129801	-0.12904	-0.0535133	0.096391	0.103761	-0.0464525	-0.142548	-0.0253879	0.121735	0.090931	-0.0837081	-0.14787	0.00908889	0.142977	0.0691298	-0.122805	-0.142988
Ctnnb1_9044.884	0.0593798	-0.0212133	0.0911414	-0.103545	-0.157791	0.0527258	-0.0811034	0.0177284	-0.1454	0.144339	0.164108	0.167086	-0.143279	-0.109439	-0.061809	0.0441727	0.0724676	0.0586366	0.0811739	-0.233244	0.0174865	-0.156541	0.0507526	0.0899907	0.0477099	0.107077	0.0122918	-0.0961226	-0.0587267	0.0531749	0.0763906	-0.00909831	-0.076524	-0.0295039	0.0509692	0.0511017	-0.0204	-0.0576839	-0.0102605	0.0446356	0.0314618	-0.0247396	-0.0412365	0.00154003	0.0365734	0.0170599	-0.0246693	-0.0278175
Ube2h_1173.192	0.0894764	0.0337821	0.0309087	-0.1909	-0.107967	-0.0799045	-0.0959176	0.0740546	0.0165115	0.107059	0.0839234	0.182777	-0.00541389	-0.209124	-0.0986871	0.315225	-0.0109163	-0.220496	-0.0673182	-0.273526	0.22821	0.0118094	0.044645	-0.020531	0.00432679	0.0124496	0.00214945	-0.0119886	-0.00866331	0.0078574	0.0131956	-0.00115858	-0.0145701	-0.006556	0.0116307	0.0130344	-0.00523146	-0.0165951	-0.00336214	0.0153947	0.0117455	-0.00992888	-0.0177471	0.00092443	0.0188361	0.00914333	-0.0150202	-0.0177022
Crebl2_1428.654	-0.0658128	-0.0107621	-0.00141709	0.0763733	-0.0174143	0.0243574	0.158168	-0.0667292	0.00471181	-0.337164	0.104364	0.00246586	0.110616	0.0640674	-0.234943	-0.148376	0.255628	0.0122312	-0.0237596	-0.138474	0.183302	0.0296342	-0.0867404	-0.0263982	0.0250153	0.0418219	-0.00261272	-0.0477104	-0.0244004	0.0358778	0.0460522	-0.0120295	-0.0581434	-0.020088	0.0487054	0.0490039	-0.0245747	-0.0690012	-0.0127185	0.063435	0.0499764	-0.0407522	-0.0797122	-0.00158235	0.0798622	0.0481063	-0.0610506	-0.0894655
Pold1_229.982	-0.121278	-0.0332822	0.0402457	-0.138321	0.287952	0.0631037	0.0456711	0.11641	-0.0771427	-0.363647	-0.212201	-0.274947	-0.087612	0.0201707	0.258035	0.425093	0.093292	0.195206	-0.748339	0.133495	-0.0303816	-0.177552	0.217382	-0.07956	0.0498621	0.0268675	-0.0344925	-0.0508986	0.00209019	0.0515305	0.0318418	-0.0328989	-0.0552223	-0.00222787	0.0529115	0.037064	-0.0308162	-0.0595206	-0.00702788	0.0539609	0.0425124	-0.0282106	-0.0637487	-0.0123226	0.0546321	0.0481613	-0.02505	-0.0678567
Nipal3_56.909	-0.0465471	0.177678	0.146177	-0.413888	-0.146215	0.121308	0.0897755	-0.157259	0.178586	-0.283985	0.0214357	-0.115611	0.224505	0.253773	-0.257846	-0.129718	0.403074	0.00126387	0.0118307	-0.260669	-0.231842	-0.140294	0.0542556	0.170887	0.0551971	0.0414873	-0.0399722	-0.0810164	-0.00666027	0.088762	0.0700264	-0.0632365	-0.136892	-0.0153458	0.141622	0.117187	-0.100177	-0.234336	-0.0325932	0.223396	0.193701	-0.159306	-0.411347	-0.0661908	0.3467	0.314501	-0.255431	-0.761538
Tmco6_47.871	0.0800629	0.110391	-0.0162052	-0.165794	-0.118157	-0.104786	-0.0676369	-0.109247	0.0935528	0.197596	-0.0100702	-0.0120284	0.0855888	-0.084154	0.175448	-0.0209367	0.308579	-0.180255	-0.247921	-0.0698738	-0.126775	0.0208907	-0.161589	0.253764	0.0429225	0.106742	0.0149686	-0.106502	-0.0709945	0.0644371	0.100414	-0.0108828	-0.113942	-0.0478551	0.0821309	0.0888634	-0.0364019	-0.114972	-0.022685	0.0952305	0.0726347	-0.0601617	-0.109574	0.0030703	0.103196	0.052495	-0.0807777	-0.0981563
Sumo1_7463.41	-0.0208209	-0.0177612	-0.0256841	0.0383203	0.0355735	-0.0305722	0.082307	0.0474641	0.0315237	-0.0632467	-0.0486948	-0.153748	-0.00798934	-0.0446346	0.0307092	0.173385	-0.0104899	-0.0243072	-0.0577113	0.0986801	-0.0347564	-0.0232911	0.00669598	-0.0137322	0.0205673	0.0323855	-0.001252	-0.0300045	-0.0144812	0.0186785	0.0224257	-0.00486673	-0.0227576	-0.00751129	0.0160162	0.0149815	-0.0064247	-0.0168007	-0.00304825	0.0131591	0.00957651	-0.00671567	-0.0120714	-0.000341362	0.0104427	0.00576824	-0.0062862	-0.00842746
Rabl3_262.875	-0.114942	0.0415452	0.124234	-0.0992632	-0.0501615	0.0745818	0.0652918	0.0118199	-0.0811933	-0.0130151	0.0270946	-0.110013	0.241062	-0.391423	-0.325081	0.256554	0.246938	0.0341322	-0.105991	0.121428	-0.185022	0.149421	-0.151595	0.021413	0.0107644	0.0167716	-0.00192579	-0.0198787	-0.00960132	0.0160144	0.0199508	-0.00587288	-0.0258546	-0.00873834	0.0229148	0.0230998	-0.0117282	-0.0329695	-0.00643709	0.0317882	0.0258833	-0.020116	-0.0412136	-0.00203447	0.0429551	0.0277935	-0.0318095	-0.05045
Ucp2_1212.798	-0.117817	0.226718	-0.0667931	0.090394	-0.211627	0.150343	-0.0704848	-0.189051	-0.193946	0.101004	0.0315171	0.147684	-0.089031	-0.109653	0.226282	0.324675	0.0119409	-0.218202	-0.0918942	-0.266322	0.0361744	-0.025847	0.0173531	0.087808	0.0137438	0.0307707	0.00246755	-0.0327546	-0.0210206	0.0232599	0.0353906	-0.00535259	-0.0425265	-0.0178409	0.0351172	0.0386928	-0.0166749	-0.0528511	-0.0111823	0.0492465	0.0396775	-0.0321649	-0.0628974	-2.07077e-05	0.0653193	0.037066	-0.0524161	-0.0714164
Gemin5_147.476	-0.102808	-0.159699	0.0282919	-0.0372279	0.0732397	0.199295	0.111106	0.195058	0.0785053	0.0122661	-0.179721	-0.256047	-0.262955	-0.126387	-0.681391	0.0584532	0.141732	0.511275	0.167867	0.199763	0.00526768	-0.120902	-0.144616	-0.109769	0.00482134	0.00226807	-0.00345112	-0.00463946	0.000450531	0.00505059	0.00291007	-0.00325786	-0.00517337	-0.000102544	0.00522753	0.00359529	-0.00298145	-0.00569686	-0.00073408	0.00534163	0.00431836	-0.0026146	-0.00619951	-0.00144479	0.0053819	0.00507247	-0.00215052	-0.00666974
Ly6a_524.365	-0.233888	0.0907114	0.0692715	0.0134801	0.134571	0.116586	0.1417	-0.11464	-0.185592	-0.187802	-0.0756626	0.00566664	0.0753072	-0.160432	0.0703878	0.181898	0.0736488	-0.118004	-0.307397	0.0987601	0.17092	0.105088	0.0946597	-0.229868	0.0028485	0.0353156	0.0155137	-0.0336116	-0.0361086	0.0195481	0.0508652	0.00453975	-0.0588341	-0.0362098	0.0471843	0.0653404	-0.0204361	-0.0910817	-0.0233232	0.0874481	0.0726482	-0.0666942	-0.126259	0.0116295	0.139445	0.0624998	-0.142902	-0.153966
0610010B08Rik /// Gm14295 /// Gm14305 /// Gm14308 /// Gm14419 /// Gm14430 /// Gm14432 /// Gm14434 /// Gm2004 /// Gm4724_1750.922	0.0576862	0.0632254	-0.20468	0.0715102	-0.235106	-0.015028	0.149424	0.0165272	0.153117	-0.133606	0.0892029	-0.0135378	0.141138	0.0879411	-0.185412	-0.438592	0.0626824	0.00125712	0.0858328	-0.00462358	-0.0098474	0.258591	-0.0190165	-0.159525	0.0591155	0.0385865	-0.0404743	-0.0711685	-0.00270252	0.0723343	0.0515555	-0.0468678	-0.0910372	-0.00848032	0.0881386	0.0682999	-0.0537291	-0.116313	-0.017013	0.106916	0.0897612	-0.060851	-0.148511	-0.0293359	0.129072	0.117057	-0.0678847	-0.189636
Entpd5_568.967	0.000103189	-0.0257214	-0.0655704	0.21029	-0.253422	0.184764	0.0398922	-0.0947097	-0.192872	-0.120996	0.193479	0.0958638	0.108975	0.0236475	-0.217114	0.105532	-0.0847884	-0.0680816	-0.0375254	-0.031082	0.121126	0.106259	-0.142645	0.0108698	0.0080607	0.0869971	0.0351143	-0.0710346	-0.0694305	0.033697	0.079623	0.00666565	-0.0777896	-0.0437017	0.0513154	0.0652697	-0.0182303	-0.0750772	-0.0179974	0.0606268	0.0464235	-0.0374012	-0.0647834	0.00498389	0.0621588	0.0256547	-0.0495975	-0.049366
Yme1l1_1778.279	0.0632299	0.0638243	-0.229534	0.00664276	-0.0471231	-0.109414	0.0310357	0.00981671	0.224317	-0.199439	0.149417	0.0481546	0.256427	0.157163	-0.447536	-0.431057	-0.0440957	-0.0666317	0.112898	0.145392	0.0965188	0.169995	-0.0440578	-0.174816	0.00418369	0.00398256	-0.00203993	-0.00564653	-0.00134902	0.00527552	0.00480808	-0.00270994	-0.006978	-0.00146001	0.00664377	0.00579536	-0.00358097	-0.00861675	-0.00154554	0.00835632	0.00697345	-0.00471011	-0.0106323	-0.00158705	0.0104971	0.00837581	-0.00617011	-0.0131096
Ran_21675.389	-0.0248996	-0.0424577	0.0711617	-0.137205	-0.0294132	0.0342356	0.0774858	0.150276	0.0845017	-0.00636732	-0.0267498	-0.185504	0.043953	0.0799549	-0.405677	-0.252463	0.0595856	0.262981	0.0880062	0.144418	-0.0723778	0.100012	-0.0515978	-0.119824	0.00164281	0.00397818	0.000433698	-0.00420173	-0.00287399	0.00304185	0.00492606	-0.000588015	-0.00584912	-0.00266842	0.0049839	0.00580215	-0.00226103	-0.00778993	-0.00190253	0.00756191	0.00642013	-0.00480153	-0.00993723	-0.000289541	0.010838	0.0064985	-0.00845019	-0.0121082
Mief1_493.109	0.0574111	-0.0748962	0.0274842	-0.140367	0.035764	0.0157894	0.0862242	0.0456122	-0.002066	-0.0841291	0.0259085	-0.0136638	0.0300107	0.0938004	-0.41194	0.164984	0.0388608	0.0284601	0.0685425	-0.084961	0.0332392	0.00772234	-0.0312377	-0.00559104	0.0248428	0.0160522	-0.0154427	-0.0269367	-0.00153157	0.026326	0.0187777	-0.0152013	-0.0296838	-0.00353784	0.0277754	0.0217669	-0.0147459	-0.0325831	-0.00586067	0.0291692	0.0250317	-0.0140441	-0.0356289	-0.00853071	0.0304824	0.0285833	-0.0130611	-0.0388124
Tspan5_279.964	0.0105421	0.0689696	0.145948	-0.219949	-0.0573689	-0.0354099	0.0167975	-0.160482	-0.284727	-0.103553	0.0142239	0.00693496	0.0985199	0.165796	0.208032	0.432018	0.192207	-0.132106	-0.109922	-0.569394	-0.434083	-0.156233	0.22576	0.27491	0.0251907	0.119433	0.0373956	-0.103439	-0.0885767	0.0513863	0.104154	0.00399557	-0.104687	-0.0552302	0.0676348	0.083727	-0.0232039	-0.0968504	-0.0249954	0.0749649	0.0607138	-0.0430666	-0.0826071	0.000404034	0.0747766	0.0374101	-0.055315	-0.064631
Tatdn1_807.943	-0.0334471	0.0781059	-0.0831237	0.0503569	-0.0401905	-0.133071	0.106808	-0.0112134	0.0632927	-0.0684454	0.0811999	0.0195507	0.0891238	0.0373698	-0.0347088	-0.321573	-0.179207	0.0615227	0.0760158	0.180136	-0.070459	0.202329	-0.073997	-0.103065	0.0267957	0.0528143	0.000528926	-0.0645996	-0.0392664	0.0503104	0.0746448	-0.0142837	-0.10256	-0.0436012	0.0881912	0.101876	-0.044335	-0.159428	-0.0400742	0.146603	0.133383	-0.101308	-0.243389	-0.019775	0.23269	0.165633	-0.206217	-0.365781
Cltb_890.76	-0.0517031	0.0435097	-0.0173757	-0.0258926	0.051173	0.0569257	0.106236	-0.0170863	-0.0995345	-0.173806	-0.148401	0.00380101	0.0419749	-0.0730853	0.116896	0.257844	0.14632	0.0144964	-0.138456	-0.0834134	-0.193569	-0.0775905	0.0902042	0.074034	0.0140614	0.0507819	0.0127626	-0.0485865	-0.0397641	0.029165	0.0561966	-0.00037721	-0.0621274	-0.0326307	0.0462317	0.0581696	-0.0179129	-0.0742161	-0.0201698	0.0642932	0.0554209	-0.0397278	-0.0831529	-0.00196119	0.0820265	0.0466475	-0.0652523	-0.0869799
Zfp449_205.311	0.124736	-0.156158	0.129175	-0.213397	-0.171174	0.0541624	0.270116	-0.255429	-0.0556044	0.0937156	0.143312	0.239219	0.0538821	-0.32402	-0.135942	-0.260244	0.076953	0.110022	0.0600306	0.224138	-0.386075	0.134267	0.0222804	-0.0481631	0.0522607	0.0545185	-0.0251581	-0.0821618	-0.0234326	0.0744973	0.0743072	-0.0386564	-0.116749	-0.0293579	0.105712	0.100874	-0.0591003	-0.16659	-0.0361796	0.149154	0.13628	-0.0901094	-0.239289	-0.043623	0.208947	0.183036	-0.13739	-0.347374
Ptk2b_1615.996	0.0662888	-0.0638342	0.0138767	-0.0362243	0.025014	0.030235	-0.0575633	0.00552186	-0.0736558	-0.166892	0.017028	0.11154	0.0775061	0.134992	-0.0889723	0.111661	0.0836955	-0.122329	0.0176701	-0.211921	0.0186331	-0.0683681	0.0272551	0.0852784	0.0201185	0.0187652	-0.00864712	-0.0242005	-0.00605643	0.02001	0.0181469	-0.00892055	-0.0237365	-0.00550666	0.0198916	0.0175378	-0.00917829	-0.0232726	-0.00497272	0.019764	0.0169381	-0.0094207	-0.0228092	-0.0044544	0.0196275	0.0163478	-0.00964816	-0.0223467
Gm3579_250.259	0.402773	-0.0596301	-0.15954	-0.71638	-0.278265	0.123089	0.0124598	0.240928	-0.0719713	0.269787	0.383904	0.232914	0.00774712	-0.399272	-0.620364	0.198591	-0.40779	0.113699	-0.0293912	-0.137566	0.406002	-0.0333146	-0.0997884	-0.0714602	0.211824	0.113576	-0.145626	-0.213588	0.00359443	0.176797	0.111609	-0.106172	-0.184948	-0.0144767	0.145699	0.106761	-0.0750506	-0.158535	-0.0271242	0.118451	0.0999758	-0.0506945	-0.134597	-0.0353952	0.0948829	0.0919889	-0.0318316	-0.11321
Kpna4_217.643	0.00469589	-0.0723685	-0.0706871	-0.593676	0.240355	0.139355	0.304241	0.219779	0.0572164	-0.312809	-0.21591	0.126817	-0.0946173	-0.154113	-1.1198	0.487244	-0.113451	0.202377	0.37708	-0.439403	0.493959	-0.0245875	-0.173865	-0.210432	0.166373	0.0661347	-0.15105	-0.186334	0.0315927	0.197951	0.111001	-0.156751	-0.250753	-0.00165245	0.229254	0.167387	-0.151697	-0.329164	-0.0528892	0.257983	0.235719	-0.131101	-0.422614	-0.128688	0.281036	0.315713	-0.0897065	-0.531045
Tor1aip1_272.239	-0.185218	0.20701	0.0654861	-0.23464	0.0867112	0.0677376	-0.0164511	-0.103397	0.203598	-0.0685222	-0.0318656	-0.0406562	0.0333182	-0.095222	-0.467199	0.250678	0.109811	0.0377391	0.194475	-0.269775	0.0481049	0.0895886	-0.00656793	-0.0902097	0.00171471	0.000934797	-0.00104868	-0.00157012	1.30499e-06	0.00150669	0.000964021	-0.000829873	-0.00145801	-0.000136912	0.00131084	0.000971135	-0.000636988	-0.00134125	-0.000247301	0.0011283	0.00096009	-0.000468598	-0.00122271	-0.000333069	0.000959787	0.000934421	-0.000323108	-0.00110479
Lamb3_676.965	-0.176031	0.205394	0.0174973	0.0987349	-0.0958852	0.150705	-0.0761391	-0.268826	-0.360463	0.0275638	0.0674434	0.167064	-0.0289705	0.219964	-0.0342608	0.119675	0.174153	-0.10346	-0.166874	-0.0874954	0.0336282	-0.263368	-0.143739	0.292582	0.0645155	0.0231037	-0.0483207	-0.0548449	0.00957845	0.0566424	0.0289214	-0.0361947	-0.0525929	-0.000191513	0.0483641	0.0324981	-0.0253407	-0.0488929	-0.00798445	0.0400482	0.0341803	-0.0158755	-0.0441865	-0.0139102	0.0319928	0.034304	-0.00783986	-0.0388601
Jak3_137.176	0.0609001	-0.263314	0.144973	0.0544276	-0.00936969	-0.0699249	0.0998832	-0.25477	-0.212468	0.0860863	-0.00656077	0.469261	-0.146445	-0.165712	-0.542999	0.513867	0.148558	-0.14758	0.0333347	-0.452425	0.120911	0.16932	-0.0519039	-0.0470379	0.0436278	0.0158183	-0.0360828	-0.0424085	0.00831164	0.0491442	0.0260159	-0.0348138	-0.0528071	-2.78846e-05	0.0537401	0.0379237	-0.0312259	-0.0636367	-0.0110685	0.0568914	0.0514135	-0.0248037	-0.0744213	-0.0251064	0.057985	0.0662385	-0.015043	-0.0845236
Abhd6_192.339	-0.223148	0.450203	-0.12348	-0.172568	0.0602173	0.018479	-0.0586858	-0.0909721	-0.13735	-0.0812014	0.159758	-0.106376	0.248711	-0.0850186	-0.161309	0.383444	-0.0969972	-0.037251	-0.00223423	-0.00690514	-0.264942	-0.0476159	-0.0302038	0.144081	0.0328095	0.264064	0.10648	-0.239302	-0.230191	0.101133	0.233094	0.0244346	-0.247817	-0.141638	0.142452	0.188363	-0.0439954	-0.229218	-0.0641644	0.16082	0.136191	-0.0942881	-0.192357	-0.00171671	0.160566	0.0824315	-0.124649	-0.146055
Senp8_35.901	-0.128188	0.0328852	-0.196972	0.135706	0.155403	0.170716	-0.173178	0.125403	0.142869	-0.44325	0.0513931	-0.00396422	-0.0664663	-0.132649	-0.227795	-0.276823	0.264418	0.550978	-0.0472542	-0.333351	0.0463611	0.13228	-2.75579e-05	-0.155253	0.00135603	0.00289227	0.000124223	-0.00343897	-0.00225163	0.00278756	0.00442675	-0.000674166	-0.00579986	-0.00272271	0.00534669	0.00655733	-0.00248114	-0.00951614	-0.00279322	0.00976314	0.00934058	-0.00616546	-0.0152033	-0.0017833	0.0171479	0.012648	-0.0132148	-0.0236368
Ikbkg_422.021	0.0348674	0.0186343	0.0205458	-0.0908559	-0.163776	0.0764506	0.0604991	-0.0296404	-0.00907369	0.0106529	0.0266847	0.054268	0.129529	0.0363954	-0.308948	0.0349955	0.0453234	0.0269444	0.00824067	-0.202236	0.0574948	0.0860908	0.0894591	-0.0917176	0.0455682	0.0234822	-0.0374135	-0.0551766	0.00412126	0.0645838	0.0420483	-0.047062	-0.0854861	-0.00571469	0.0897736	0.0714264	-0.0563945	-0.130841	-0.0256852	0.122144	0.116457	-0.0627016	-0.19849	-0.0631517	0.162215	0.183261	-0.0608787	-0.299633
Fam210a_51.89	0.170313	-0.0689626	-0.341012	-0.0189971	0.0919425	-0.0630378	-0.518962	0.0900327	-0.504312	-0.0243546	0.226949	1.08289	0.0524827	-0.122085	-1.05989	-0.229088	0.516239	-0.171824	-0.383436	0.224076	-0.129267	-0.17928	0.108259	-0.049799	0.106064	0.151836	-0.0173794	-0.178832	-0.0813363	0.11627	0.140373	-0.0358696	-0.176385	-0.0611799	0.124393	0.127687	-0.0530827	-0.171623	-0.0415777	0.130474	0.113979	-0.0688243	-0.164757	-0.022748	0.134568	0.0994522	-0.0829273	-0.156022
Rabac1_1784.356	0.00883875	0.038043	0.116325	-0.100841	-0.0663593	-0.0267741	-0.0701326	-0.162228	-0.0834148	0.0548723	0.0808309	0.0507017	0.00123331	-0.0944984	0.256535	0.281184	-0.0524998	0.0194134	-0.0506154	-0.438735	-0.146177	0.00194176	0.0822972	0.137214	0.00508002	0.00274141	-0.00381914	-0.00579268	0.000238134	0.00667803	0.0044337	-0.00443858	-0.00815374	-0.000717926	0.00864743	0.00689607	-0.00493592	-0.0113144	-0.00236885	0.0110148	0.0104136	-0.00513763	-0.015489	-0.00505887	0.0137723	0.0153549	-0.00476822	-0.0209262
Ubxn1_8099.891	-0.0555127	0.0732076	-0.056504	0.00427911	0.0146661	-0.0138418	0.0542232	0.00120024	0.0574906	-0.141157	0.0994168	0.0600481	-0.0447077	0.0405261	-0.221546	-0.113957	0.0166417	0.102046	0.0816876	-0.0394209	0.0840011	0.0578294	-0.0575962	-0.055201	0.00344525	0.0337158	0.013377	-0.0260382	-0.0256302	0.0120037	0.0297183	0.00326361	-0.0271628	-0.0163794	0.0174631	0.0238738	-0.00489512	-0.0254743	-0.00775299	0.0200466	0.0171303	-0.0107633	-0.0217795	-0.000409725	0.0201814	0.0103099	-0.0142975	-0.0168934
1810022K09Rik_25.451	0.22942	-0.225245	0.313987	-0.408691	-0.221416	-0.665894	0.00761763	-0.183802	-0.0064743	-0.141252	0.0415809	-0.00537241	1.12617	-0.12596	-0.423776	-0.497902	0.866675	-0.3184	-0.500121	-0.299265	-0.822218	0.346625	0.000347422	0.18771	0.0293575	0.0347014	-0.00654536	-0.034498	-0.0130546	0.0223238	0.0234199	-0.00662896	-0.0243383	-0.00749107	0.0167767	0.0156474	-0.00605638	-0.0170783	-0.00405321	0.0124785	0.0103427	-0.00521241	-0.0119161	-0.00198036	0.00919628	0.00675596	-0.00431257	-0.00826493
Rnf219_38.862	-0.0711726	-0.0540427	0.245069	-0.0340914	-0.0290733	-0.02954	-0.0316601	-0.0359752	-0.0419335	-0.0489835	-0.0565734	-0.0641516	-0.0711664	0.0946642	0.453547	-0.0833134	-0.0825577	-0.0541108	-0.0705293	-0.0581532	-0.0408003	-0.0179189	0.0110427	0.0466362	0.00716087	0.0113469	-0.000423376	-0.0108232	-0.00551153	0.00696411	0.00888317	-0.00159701	-0.00915466	-0.00351334	0.00652001	0.00680563	-0.00232637	-0.00760899	-0.00199594	0.00592693	0.00508439	-0.00271994	-0.00621619	-0.000873347	0.00525855	0.00368319	-0.00286687	-0.00498978
Txndc11_29.438	-0.0585716	-0.223876	0.125546	-0.577548	0.391346	0.161716	0.2845	0.24205	0.275858	-0.888828	-0.0311879	-0.0362398	-0.193368	-0.175362	-0.237255	-0.288546	-0.325116	0.580598	0.298965	0.0922658	0.320678	-0.143062	-0.529967	0.0324545	0.273616	0.0980907	-0.239334	-0.268895	0.0458674	0.244427	0.128295	-0.175372	-0.261812	-0.00252761	0.211442	0.147506	-0.118674	-0.244972	-0.042734	0.176376	0.157399	-0.0697673	-0.221202	-0.0743104	0.140776	0.159527	-0.0287219	-0.193083
Hnrnpul2_1109.807	0.0311265	0.0858018	-0.132846	-0.0179022	0.0743334	-0.211792	0.0811523	-0.0116426	-0.0143957	0.0756667	-0.0231477	0.0344649	-0.0506276	0.0832693	0.123081	-0.00154057	-0.0608425	-0.223164	-0.0124065	0.0397577	0.162613	-0.0872134	-0.118328	0.0966325	0.0168936	0.0100736	-0.0129695	-0.0214205	6.36386e-05	0.0250593	0.017953	-0.0171354	-0.0340617	-0.00394845	0.0366493	0.0309822	-0.0217382	-0.0536332	-0.0122304	0.0527627	0.0520676	-0.0259579	-0.0837659	-0.0281453	0.074611	0.0854486	-0.027968	-0.130033
Zbtb42_239.641	-0.0148799	0.0290858	0.125888	-0.0755307	-0.0751851	0.0331542	0.00378923	-0.147731	-0.287032	-0.00287206	0.0914529	0.139836	0.140577	-0.0410414	0.0822343	0.272015	-0.128736	-0.00589464	-0.00462746	-0.261657	-0.265471	0.0729593	0.0568702	0.112636	0.00556417	0.0603225	0.0247437	-0.047258	-0.0474252	0.0212601	0.054003	0.00659938	-0.0500954	-0.0308337	0.0316211	0.0441286	-0.00849678	-0.047685	-0.0150497	0.0369063	0.0322884	-0.019744	-0.0413699	-0.00133931	0.0377439	0.019933	-0.0268609	-0.0325891
Mybl1_73.251	-0.0944663	0.17207	-0.18858	-0.218786	-0.126462	-0.176497	0.0663305	0.515606	0.114501	-0.192914	-0.036027	-0.210845	0.243121	0.384043	-0.863626	-0.700082	0.103947	0.0847425	-0.452936	0.429769	0.3704	0.317405	0.0896606	-0.607734	0.0648864	0.0537375	-0.0381821	-0.0890429	-0.0155546	0.0837472	0.0729401	-0.0472654	-0.11948	-0.0247104	0.107737	0.098566	-0.0581786	-0.160721	-0.0382023	0.138076	0.132531	-0.0711388	-0.217037	-0.0579528	0.176189	0.177178	-0.0863023	-0.29483
Fbxw5_688.58	0.111677	-0.046441	0.119498	-0.410686	-0.0168816	0.0273409	0.109606	0.0539097	0.0107105	0.0692263	0.0219543	-0.0454568	0.027734	-0.124238	-0.164063	0.175685	0.0601162	0.12619	-0.147695	-0.218917	0.0797949	0.0232172	0.0456331	-0.0186567	0.0469037	0.0222359	-0.0376851	-0.0523189	0.00493919	0.0595109	0.0371547	-0.0415466	-0.0728231	-0.00481938	0.0737787	0.0579422	-0.042976	-0.0992747	-0.0211173	0.0891751	0.0860668	-0.0400449	-0.132776	-0.0468437	0.10469	0.123063	-0.0300394	-0.174352
Dnajc14_1045.16	0.110409	-0.0734296	0.0141723	-0.166979	0.0066008	0.0155144	0.0664602	0.0278099	0.0301361	-0.221624	0.0911703	0.0454752	0.0231505	0.00543436	-0.109981	0.227091	0.0511389	-0.0718815	-0.0308638	-0.157726	-0.0315894	-0.0155314	0.0553853	0.035622	0.0119718	0.0478824	0.0135622	-0.0445208	-0.0384892	0.0253824	0.0527738	0.00207253	-0.0564908	-0.0324311	0.040379	0.0547604	-0.0130042	-0.0672122	-0.0219846	0.0561725	0.0528641	-0.0315213	-0.0753734	-0.0068525	0.0717182	0.046114	-0.0529969	-0.0794954
Tfpt_89.258	0.0206476	0.0744338	-0.104894	-0.0190432	-0.0160391	-0.0132545	-0.0106907	-0.00834929	-0.00623171	-0.183289	0.176843	0.0329977	-0.00437809	0.0222825	-0.0216357	0.17709	0.00247611	0.00251358	-0.461416	0.194874	0.00118964	0.000264668	-0.00563657	0.0279854	0.0137853	0.0164127	-0.00510998	-0.0220901	-0.00827813	0.0193711	0.0216408	-0.00812292	-0.0301412	-0.00995533	0.0271174	0.0284406	-0.0126289	-0.0410908	-0.0117438	0.0378145	0.0372419	-0.0193114	-0.0559889	-0.0135015	0.0525167	0.0485718	-0.0291587	-0.0762858
Tap2_250.381	0.0402369	0.147386	-0.0044577	-0.584091	0.20994	0.0686696	0.108272	-0.076003	-0.00163067	-0.0811683	0.070434	-0.0272804	0.0352809	-0.17608	-0.0577616	0.257642	0.202623	-0.110309	-0.0237969	-0.0655361	-0.255656	-0.00845712	-0.0470762	0.151207	0.103904	0.159368	-0.00465276	-0.159086	-0.0785355	0.0887819	0.111713	-0.0185359	-0.116547	-0.0443336	0.0732091	0.0764666	-0.0242493	-0.0843125	-0.0228166	0.0586908	0.0510104	-0.0251256	-0.0602036	-0.00965371	0.0459578	0.0330406	-0.0233783	-0.0423973
Os9_1738.259	0.0662657	-0.0185476	0.0549658	-0.185956	-0.0416162	0.0680107	0.0385609	-0.0871595	-0.0385332	0.0826818	-0.004437	0.0880885	-0.102959	-0.0638118	0.0790913	0.25299	-0.049705	-0.154558	0.0469968	-0.193169	0.0514113	-0.0217659	-0.0160457	0.0684513	0.0466652	0.0603702	-0.0133341	-0.0769595	-0.0322723	0.0601545	0.070725	-0.0219007	-0.0949584	-0.0336136	0.0768901	0.0823494	-0.0335522	-0.116836	-0.0337988	0.0975034	0.09525	-0.0492299	-0.143387	-0.0322544	0.122704	0.109375	-0.0701601	-0.175574
Nudt21_875.357	0.000171771	-0.0683145	0.0290998	-0.0360473	0.0104902	0.0904931	0.0590357	-0.0208157	0.0523179	-0.400398	-0.0433778	0.133381	0.0299001	0.00482755	-0.220733	0.197079	0.250024	-0.0424709	-0.123344	0.220326	-0.46809	0.0568842	-0.00242084	0.0780684	0.0800323	0.0920054	-0.0350347	-0.142199	-0.0494332	0.122849	0.135795	-0.0588511	-0.223202	-0.0701939	0.186937	0.198837	-0.098637	-0.356118	-0.099193	0.281078	0.288068	-0.165766	-0.585452	-0.139431	0.415873	0.411586	-0.281526	-1.02414
Atp5d_3933.743	0.0465761	0.0876547	-0.0258896	-0.175226	0.0123355	-0.0626356	-0.00055045	0.01942	0.0248673	-0.151391	0.0635034	0.101314	0.0178388	-0.0688995	0.126606	0.217892	-0.00055681	-0.0926839	-0.092927	-0.223865	-0.0339982	0.0246533	0.0210099	0.0860509	0.0187432	0.0687105	0.0183994	-0.0702806	-0.0607657	0.042832	0.0885893	0.00271863	-0.104805	-0.0613822	0.0775165	0.108268	-0.0262471	-0.148335	-0.0512215	0.124417	0.124327	-0.0745841	-0.200112	-0.0239831	0.184184	0.131396	-0.150644	-0.256783
Als2cl_224.459	0.110466	0.0833121	-0.179137	-0.169395	-0.230576	-0.0163055	0.156577	0.247689	-0.0358637	-0.0793534	0.06534	0.142296	0.0237976	-0.155742	-0.531048	0.389159	-0.110838	0.0531584	0.0946571	-0.270633	0.229697	-0.162643	0.0886043	-0.0469837	0.0370691	0.108214	0.0229641	-0.101592	-0.0772132	0.0551811	0.100395	0.000272126	-0.10585	-0.0558823	0.0693387	0.0890416	-0.0208889	-0.105109	-0.0341941	0.0793668	0.0748492	-0.0396871	-0.0998174	-0.013122	0.0852549	0.0585735	-0.055436	-0.0906173
Trub2_452.158	-0.134356	-0.0147975	-0.0361227	0.105342	-0.264179	0.0982304	0.158283	0.0939461	0.0652756	-0.0910099	-0.115973	-0.0905983	0.17553	0.049197	-0.288722	-1.25441	0.227352	0.436719	0.188305	0.27944	0.0714008	0.0590079	-0.187377	-0.209584	0.00265386	0.00662163	0.000994688	-0.0059682	-0.00420551	0.00354966	0.00602173	-0.000209825	-0.00603136	-0.00305763	0.00422948	0.00527337	-0.00128434	-0.00587716	-0.00192153	0.00469201	0.00441766	-0.00220449	-0.00553334	-0.000835662	0.00494357	0.00349529	-0.00295375	-0.00503146
Gm7120_203.311	0.139126	-0.235306	-0.066756	-0.0952877	0.0368725	-0.0336812	0.00559392	0.108689	0.10965	-0.157583	-0.0499453	0.266485	0.306692	0.114065	-0.900899	-0.612021	0.159679	-0.0147769	0.170339	0.302137	0.127167	0.106796	-0.0834108	-0.247789	0.00831227	0.0130542	-0.00119062	-0.0152398	-0.00794393	0.011814	0.0158571	-0.00335142	-0.019724	-0.00826896	0.0164481	0.0190243	-0.00656142	-0.025287	-0.008082	0.0225077	0.0225096	-0.0111974	-0.0321196	-0.00708411	0.0303404	0.0262121	-0.0177508	-0.040422
Chuk_1643.832	-0.0589635	-0.00110757	-0.168614	0.0964667	0.0414857	0.0438357	0.0929074	0.142573	0.0296747	-0.139536	-0.0401189	-0.0481862	0.0499815	0.0307128	-0.595911	-0.105745	0.024632	0.242186	0.181845	-0.0748226	0.25099	0.0654153	-0.133506	-0.146095	0.00429978	0.00581862	-0.00128654	-0.00767425	-0.00342838	0.00673904	0.00833542	-0.00252574	-0.0114573	-0.0044027	0.0104902	0.0118786	-0.00465064	-0.0170547	-0.00549482	0.0162243	0.0168309	-0.00822027	-0.0253197	-0.00658483	0.0249348	0.0236955	-0.0141257	-0.0375066
Zscan22_204.994	0.00818597	-0.0845262	0.0931169	-0.105708	0.028009	0.105119	0.10467	-0.0888576	-0.183254	0.0925694	-0.0847606	-0.0556399	0.0387218	0.0410102	-0.0221888	0.165814	-0.0258586	-0.0453958	-0.258295	0.287783	-0.1135	-0.0518423	0.0780746	-0.0334571	0.0426904	0.030076	-0.0263597	-0.0510653	-0.00564928	0.0492391	0.0391487	-0.027399	-0.0621557	-0.0117504	0.0563529	0.0502651	-0.0276282	-0.0752268	-0.0199668	0.0639559	0.0637692	-0.0266901	-0.0905494	-0.0308589	0.0719212	0.0800354	-0.0241314	-0.108411
Cbr3_44.237	0.0882512	-0.142731	0.00262532	-0.0738498	0.058878	-0.10901	0.416105	-0.311628	-0.169958	0.225146	-0.169588	0.0899846	0.0228177	-0.176146	-0.165193	0.324632	0.149985	-0.114303	-0.108678	-0.00527833	-0.0636871	-0.0365167	-0.0013624	0.0367989	0.0634975	0.0563837	-0.0292127	-0.0776134	-0.0184773	0.062663	0.0572596	-0.0277427	-0.077623	-0.0199431	0.0618053	0.0581104	-0.0262663	-0.0776006	-0.0213988	0.0609246	0.0589358	-0.0247841	-0.077546	-0.022844	0.0600215	0.0597356	-0.0232969	-0.0774596
Mtmr1_249.712	0.129042	-0.136181	0.0748999	-0.239967	-0.0216721	0.142454	0.00985107	0.164249	-0.113087	-0.0851718	-0.0277091	0.0764337	-0.0467155	-0.0538638	-0.0612731	0.16453	0.144488	-0.0359911	-0.0996642	-0.0221403	-0.145884	-0.0150865	0.10021	0.00389405	0.0262854	0.0779464	0.0167671	-0.0699202	-0.0533878	0.0375204	0.0689749	0.000793636	-0.0693073	-0.0370868	0.0451064	0.058364	-0.01266	-0.065546	-0.0219661	0.0493539	0.0468395	-0.0233544	-0.0593601	-0.00850747	0.050654	0.0350573	-0.0312206	-0.0514699
Gclm_3607.489	-0.0232312	0.0484649	-0.0675648	-0.0281105	0.0696872	-0.149588	0.16185	0.00819752	0.105006	-0.117895	0.0205294	-0.0722968	-0.0521843	-0.0548525	-0.0652362	0.314868	-0.108573	-0.162839	-0.0745225	0.122691	0.119782	-0.0214224	-0.0308229	-0.0406446	0.0369616	0.019683	-0.0243982	-0.0363938	0.000205079	0.0356051	0.0236428	-0.0202636	-0.0377291	-0.0047387	0.0336607	0.0271838	-0.0158145	-0.0384177	-0.00960059	0.031161	0.0302513	-0.0111295	-0.0384496	-0.014298	0.0281475	0.0327985	-0.00629023	-0.0378267
Car2_1121.385	-0.103868	0.254649	-0.00368291	-0.00837895	-0.170658	-0.0257171	0.0289662	-0.175024	-0.154495	0.0233363	0.141496	0.0720017	0.0384938	0.0503509	0.0738737	0.0789359	0.151555	-0.122133	-0.12664	-0.0933081	-0.119839	-0.0654213	-0.0803099	0.217735	0.0355301	0.142483	0.0417028	-0.114492	-0.0942021	0.0504082	0.101334	0.00684326	-0.0912079	-0.0503951	0.051922	0.0677136	-0.0121196	-0.0681282	-0.0223963	0.0464665	0.0420637	-0.0204008	-0.0480788	-0.00559205	0.0380783	0.0236862	-0.0221353	-0.0320471
Desi1_507.311	-0.0354257	0.0333782	0.101515	-0.315004	0.15365	-0.0928855	0.192118	0.105101	-0.00839528	-0.144685	0.0385998	0.00442329	-0.0212961	-0.170167	-0.019834	0.0170757	-0.0308423	0.113818	-0.0457665	0.0465371	0.0342222	-0.000191749	0.0367875	-0.0853224	0.0364049	0.052199	-0.0065231	-0.0603131	-0.0288291	0.0435984	0.0550197	-0.0124904	-0.0671921	-0.0265651	0.0514935	0.0574919	-0.0195022	-0.074347	-0.0233828	0.0600954	0.0595048	-0.0276637	-0.0817089	-0.0191535	0.0693988	0.0609326	-0.0370845	-0.0891892
E2f2_31.358	0.0630662	0.116421	-0.265158	-0.0323196	-0.0439326	-0.0733671	0.226315	0.0500422	-0.169903	-0.0525258	0.0714561	-0.151412	0.377377	-0.172461	-0.133464	0.289184	-0.144555	-0.0987961	-0.0439099	-0.0781569	0.0430025	-0.0771426	0.179838	-0.0818247	0.0958713	0.0601755	-0.052139	-0.089748	-0.00777667	0.0717211	0.0515625	-0.0341078	-0.0697826	-0.0118663	0.0530259	0.0434096	-0.0215082	-0.0538807	-0.0135783	0.0387226	0.0360049	-0.0128237	-0.0413091	-0.0137773	0.0279029	0.0294791	-0.00694745	-0.0314415
Cela1_267.322	0.0111373	-0.00771847	0.110052	0.0365723	-0.156992	-0.0677934	0.0352427	-0.249108	-0.0394562	0.0366974	0.156055	0.0467045	0.125273	-0.236884	0.168661	0.211515	-0.00600481	-0.0482551	-0.135401	-0.00459079	-0.29785	-0.0144606	0.086206	0.101813	0.0311275	0.0249201	-0.0124669	-0.029199	-0.00621354	0.0211189	0.0176645	-0.00795988	-0.0200868	-0.00482805	0.014294	0.0124923	-0.00504994	-0.0138189	-0.00369973	0.00965428	0.0088165	-0.00317895	-0.00950426	-0.00280355	0.00650805	0.00621096	-0.00198222	-0.00653369
Cdkn1c_25.581	0.284445	-0.133362	0.182785	-0.598939	0.0613611	-0.141394	-0.0242442	-0.114683	-0.0915102	-0.11802	0.258511	0.385421	0.325021	-0.174281	-0.17541	0.139838	0.0912132	-0.164444	-0.356988	-0.0571978	-0.254665	0.101386	0.0171681	0.146589	0.0510167	0.0492919	-0.0218179	-0.0664582	-0.0187729	0.0537649	0.0525569	-0.0226223	-0.0706119	-0.0204743	0.0566529	0.0560282	-0.0234422	-0.0750268	-0.0223135	0.059687	0.059718	-0.0242762	-0.07972	-0.0243011	0.0628739	0.0636391	-0.0251231	-0.0847097
Eif1ax_5112.584	0.0609309	0.0687278	-0.0250712	-0.170857	-0.000657814	-0.0786034	-0.0380658	0.0899643	0.0476545	-0.0575673	0.0518955	-0.0128292	0.117848	0.0033689	0.0734989	0.042008	-0.154217	-0.0129873	-0.0845603	0.0499679	-0.0849955	-0.0254682	0.0770366	0.017989	0.0834665	0.123895	-0.00645228	-0.126099	-0.0621287	0.0738926	0.0938137	-0.0152632	-0.0995431	-0.0398797	0.0639835	0.0700129	-0.019806	-0.0779097	-0.0242428	0.0543973	0.0514453	-0.0214707	-0.0604551	-0.0134336	0.045527	0.0371578	-0.0212809	-0.0464978
Zfp938_162.833	0.108852	-0.0627295	0.0381188	-0.274384	-0.085144	-0.0157196	0.132456	-0.0284025	0.0132049	0.0473763	0.086612	0.128174	0.159858	0.0996864	-0.882228	0.0992919	0.0861942	-0.0810647	0.0619721	0.111996	-0.0772692	0.155246	-0.0238771	-0.111474	0.0681525	0.0235933	-0.0512063	-0.0578463	0.00945197	0.059153	0.0315144	-0.0363443	-0.055684	-0.00283311	0.0492173	0.0361378	-0.0230514	-0.051208	-0.0123554	0.0390156	0.0379821	-0.0116235	-0.0451648	-0.0192182	0.0290941	0.0375744	-0.00219425	-0.0382143
B3galnt2_880.54	-0.0238075	0.00742249	-0.082418	-0.240192	-0.116167	0.0222673	0.0375866	0.291065	0.163731	-0.0509303	0.194238	-0.0999778	0.137431	-0.154376	-0.563304	-0.925388	-0.288731	0.52245	0.292367	0.23978	0.204033	0.239725	-0.0992478	-0.432685	0.031578	0.0225145	-0.0207279	-0.0407937	-0.00458915	0.0420478	0.0345581	-0.0244664	-0.0579433	-0.0119912	0.0553551	0.0520154	-0.0276741	-0.0817775	-0.0243887	0.0719609	0.0769361	-0.029323	-0.114792	-0.0445255	0.0922285	0.111945	-0.0276897	-0.160446
Rtcb_4329.512	-0.0673946	-0.0291004	0.125269	-0.0301299	0.0563188	-0.0230473	-0.00809622	-0.0115665	0.0301856	0.0618854	-0.105417	0.0152466	-0.113843	-0.163155	0.057196	0.169778	0.010948	-0.00939229	0.00476216	0.123997	-0.0828409	-0.0515542	-0.0524904	0.042625	0.0111471	0.0429675	0.0119813	-0.0356434	-0.0300471	0.0179008	0.0371478	0.00243389	-0.0349252	-0.0203941	0.0221062	0.0305044	-0.00516172	-0.0323449	-0.0117745	0.0241079	0.0235894	-0.0107886	-0.0284747	-0.00444432	0.0242911	0.0168521	-0.0145498	-0.0238342
Sucla2_4968.255	0.0113444	-0.0263646	0.0300016	-0.0490252	-0.00730439	0.00527337	-0.0186127	0.0389462	0.0422287	-0.0280381	0.034789	0.0406237	0.0170703	0.00707721	-0.115779	-0.251038	0.107578	0.0698842	0.0580445	0.025119	-0.00342684	0.0257297	-0.014986	-0.0364045	0.00162419	0.0036465	0.000371293	-0.00372888	-0.00257061	0.00252184	0.00423457	-0.000255583	-0.00473308	-0.00247669	0.00365452	0.00479232	-0.00115535	-0.00586447	-0.00216176	0.00504982	0.00526593	-0.00239056	-0.00710098	-0.00154606	0.00672928	0.00558267	-0.004029	-0.00840259
Arih2_335.963	-0.0358038	-0.0956835	0.100057	-0.0438755	0.0424417	0.124026	0.000491974	0.106404	-0.0412024	-0.136134	-0.0398338	-0.188315	0.0717668	0.0507302	-0.0713644	0.0312684	-0.08632	0.208028	0.0182619	-0.0823931	0.0420711	-0.0588647	0.110572	-0.0982722	0.000986012	0.0124461	0.00564589	-0.0108445	-0.0121576	0.00543004	0.0162686	0.00280106	-0.0167216	-0.0121378	0.0118561	0.0196951	-0.00249216	-0.0235213	-0.0098726	0.0204085	0.0218422	-0.0109438	-0.0306112	-0.00427598	0.0309416	0.0214637	-0.0231831	-0.0368618
H2-D1_8458.128	-0.0709263	0.153692	-0.0423183	-0.0167796	-0.0626578	-0.0402506	0.104613	-0.0654071	-0.0246254	0.00250078	0.0314932	0.0497451	-0.0395553	-0.0704885	-0.0263561	0.194339	-0.00908043	-0.0733718	0.00769331	-0.132291	0.113172	-0.0705452	0.0281387	0.00918909	0.00328077	0.034328	0.0147722	-0.0287386	-0.030797	0.0136091	0.0384853	0.00623233	-0.0379251	-0.0264542	0.0250655	0.0401048	-0.00500859	-0.0458042	-0.0186197	0.0368577	0.0384374	-0.0185981	-0.0512884	-0.00723695	0.0479961	0.0328356	-0.0338689	-0.0532536
Akt3_139.072	0.0451928	-0.120412	-0.142903	-0.353427	0.254071	0.241968	0.213785	0.291837	-0.154081	-0.136384	-0.313708	0.0562523	-0.0817057	-0.181191	-0.697171	0.331941	0.0449892	0.341043	0.139493	-0.152269	0.144586	0.0128263	-0.18863	-0.0679048	0.117561	0.0705717	-0.0728216	-0.120845	-0.0069817	0.103417	0.0745104	-0.0546208	-0.112889	-0.0191039	0.089491	0.0763073	-0.0385253	-0.103926	-0.0288786	0.0760174	0.0762916	-0.0244777	-0.0943306	-0.0364693	0.0631883	0.0747676	-0.0123911	-0.0844235
B4galt5_32.254	-0.0872392	0.357925	-0.175739	-0.830008	0.22418	0.143527	0.185635	-0.133199	-0.00309609	-0.451693	-0.309199	0.135442	0.781657	-0.424618	-0.624464	0.308721	0.460072	-0.117135	0.0828184	-0.977752	-0.0801584	0.135969	0.305906	-0.191025	0.120772	0.100006	-0.0748015	-0.179307	-0.0329498	0.161154	0.146812	-0.0916161	-0.259936	-0.063424	0.212939	0.212385	-0.109162	-0.380027	-0.113895	0.278259	0.302368	-0.125013	-0.56459	-0.197249	0.359092	0.422867	-0.134595	-0.864933
Pphln1_617.81	-0.0381502	-0.0463501	0.0478717	-0.179946	0.120144	0.198807	0.0435923	0.100202	-0.158288	0.0533243	-0.0946165	-0.0932728	-0.0311221	-0.204394	-0.131072	0.186679	0.0509865	0.12338	0.0560453	-0.0330111	0.0346368	-0.045984	-0.00577981	-0.0478779	0.054426	0.0600456	-0.0186474	-0.0757517	-0.0270007	0.0573663	0.0620051	-0.0205178	-0.0791481	-0.0271149	0.0604423	0.0640091	-0.0225126	-0.0826839	-0.0271829	0.0636592	0.0660572	-0.0246386	-0.0863643	-0.0272005	0.0670225	0.0681493	-0.0269034	-0.090195
Arl4a_218.397	-0.0169951	0.00449679	-0.323111	0.175934	-0.155923	0.234662	0.054129	0.123491	0.0685783	-0.262823	0.027686	0.0817082	0.119712	-0.0632141	-0.711938	-0.359588	0.176498	0.32758	-0.147086	0.360132	-0.00808178	0.0757594	0.0922304	-0.324751	0.0148056	0.01029	-0.00900792	-0.0173044	-0.00203582	0.017006	0.0137435	-0.00903355	-0.0211152	-0.00456908	0.0193017	0.0179926	-0.00861091	-0.0255181	-0.00797888	0.0216188	0.0231643	-0.00756706	-0.0305484	-0.0124782	0.0238508	0.0293924	-0.00568645	-0.0362239
Atp6v0a2_363.317	-0.0127252	-0.0554101	-0.164061	0.0556333	-0.119201	0.0797762	0.0871107	0.147802	0.0781036	-0.103948	0.0336372	-0.0340713	0.152048	0.144552	-0.947762	-0.432119	0.0288783	0.165537	0.408865	0.0150782	0.189518	0.237705	-0.20917	-0.251576	0.0146508	0.00792386	-0.0116305	-0.0180681	0.000479793	0.0214634	0.0152978	-0.0143443	-0.0290348	-0.00429761	0.03056	0.0275962	-0.016129	-0.0455452	-0.0141342	0.042116	0.047393	-0.0151723	-0.0698696	-0.0327922	0.0557906	0.0782007	-0.00814173	-0.104903
H2-K1_3969.34	-0.0263266	0.101709	-0.0818346	0.0667829	-0.117099	-0.0516894	0.082362	-0.0644933	-0.0292224	0.0253337	0.0747047	0.156082	-0.00537995	-0.0473609	-0.0578833	-0.121146	0.0339043	-0.11048	0.0665495	-0.0742496	0.188423	-0.0291363	0.0203915	-0.0575625	0.012681	0.0348099	0.00672431	-0.030563	-0.0229571	0.0167048	0.0306227	0.000523784	-0.0297784	-0.016479	0.0193759	0.0260277	-0.00460889	-0.0279997	-0.0105566	0.0208406	0.021266	-0.0086636	-0.0254746	-0.00531193	0.021262	0.0165441	-0.0116738	-0.0224356
Dlg1_820.547	-0.000292243	-0.0757575	0.00299396	-0.105684	0.0426166	0.108592	0.103798	0.156587	-0.10304	0.0543775	-0.106421	0.0630553	-0.162552	-0.166092	-0.308556	0.151417	0.0741326	0.0603137	0.144282	0.0484114	0.0882836	-0.0598885	-0.0674704	-0.0511228	0.0166855	0.0333222	0.00248406	-0.0319415	-0.0202936	0.0194763	0.0303939	-0.00195945	-0.0314954	-0.0156425	0.0215953	0.0271697	-0.0059183	-0.0304695	-0.0111749	0.0230725	0.0237411	-0.00936177	-0.0289451	-0.00695924	0.0239466	0.0201947	-0.0122725	-0.0270049
Ids_37.455	0.0476287	0.0190435	-0.110606	-0.022534	-0.185651	0.000690313	0.245422	-0.0566176	-0.103577	0.128718	0.213446	-0.0703992	0.00899196	-0.125586	-0.52541	0.327694	-0.0443996	-0.0692834	0.0808276	-0.0356472	0.211984	-0.0223673	-0.115218	-0.0216953	0.0791412	0.0614007	-0.0438841	-0.0968542	-0.0168965	0.0838107	0.0724668	-0.0413066	-0.108018	-0.0264926	0.0881254	0.0846286	-0.0375021	-0.119823	-0.0377765	0.0919459	0.0979103	-0.032281	-0.132207	-0.0509494	0.0951116	0.112323	-0.0254417	-0.145082
Zfyve19_591.401	0.0102493	-0.00724381	-0.0676461	-0.0303024	-0.0281107	0.109494	0.182017	-0.0247	-0.0716699	-0.0916144	-0.0369181	-0.00273787	-0.0105517	0.0289287	-0.0993147	-0.0232782	0.0512942	0.211844	-0.0681368	-0.133492	0.0257972	-0.00223371	0.0967113	-0.0763454	0.0702569	0.0395656	-0.0511094	-0.0812952	-0.000919121	0.0830455	0.0599013	-0.0509858	-0.105675	-0.0172335	0.0957233	0.0857216	-0.0464178	-0.134455	-0.0411623	0.107235	0.117634	-0.0354693	-0.167566	-0.0750842	0.116084	0.156042	-0.0158193	-0.204457
Arhgef39_37.263	0.86073	-0.187012	-0.933156	-0.264411	-0.580962	0.0464681	-0.101753	0.298546	0.01477	-0.282618	-0.156602	-0.151491	0.915664	0.333158	-0.258893	0.325817	0.118049	-0.511696	-0.929711	-0.320822	-0.251547	-0.0717758	0.200147	0.224835	0.748194	0.433382	-0.708787	-1.19609	-0.0152829	0.585666	0.410808	-0.396713	-0.863176	-0.106565	0.443561	0.371962	-0.211255	-0.625661	-0.155489	0.323749	0.325098	-0.0970374	-0.452374	-0.173651	0.226405	0.275825	-0.0267778	-0.324582
Jdp2_1469.587	-0.308606	-0.250485	0.22539	-0.146179	0.405417	0.386793	0.0628543	0.145811	-0.0297883	-0.229578	-0.410712	-0.292153	-0.265734	-0.396129	-0.278804	-0.338195	0.746139	0.401251	0.149857	0.168166	-0.0791879	-0.111689	-0.154323	-0.174055	5.18516e-05	0.00765474	0.00372262	-0.00536792	-0.00614179	0.00200393	0.00671375	0.001431	-0.00561217	-0.00410312	0.00322914	0.00541955	-0.000357889	-0.00527352	-0.0022562	0.00381822	0.00398795	-0.00161871	-0.00454508	-0.000716834	0.00389433	0.00258774	-0.00238173	-0.00360227
Apln_39.113	0.128705	-0.0861994	0.137065	-0.280068	-0.416162	0.303517	0.178948	-0.014906	-0.217073	-0.0408764	-0.147544	0.34149	0.0321247	-0.0397178	-0.166742	0.243714	0.22511	-0.528164	0.0861345	-0.0823789	-0.0356603	-0.193484	0.196848	-0.00135979	0.0557828	0.223549	0.0700959	-0.196834	-0.169303	0.0837494	0.178468	0.0183878	-0.174065	-0.104513	0.0949152	0.135671	-0.0168618	-0.145558	-0.0566548	0.0947904	0.0974955	-0.0383301	-0.115987	-0.0226821	0.0875219	0.0652296	-0.0490532	-0.0882485
Dancr_39.959	-0.030422	0.302251	-0.192578	-0.462682	0.0385153	-0.549525	0.313091	-0.322063	0.418034	0.0827723	0.234084	0.482042	-0.168513	-0.282095	-1.06328	-0.160431	0.133191	0.494613	-0.275399	-0.203192	-0.0919883	0.620019	-0.2155	-0.244415	0.0597298	0.0830855	-0.0133612	-0.106269	-0.0506822	0.0791706	0.10226	-0.0230652	-0.137301	-0.0583623	0.104248	0.125311	-0.0370655	-0.17752	-0.0662943	0.136351	0.152829	-0.0570357	-0.22991	-0.0740078	0.177099	0.185426	-0.0853185	-0.298667
2410004B18Rik_1654.4	-0.00326025	-0.0515457	0.0400635	-0.0586681	0.0498657	0.0670675	0.0513061	-0.0378859	0.0581048	-0.277497	0.0336989	-0.0337059	0.128947	0.0926182	-0.181821	-0.0824003	0.131623	0.144514	-0.093918	0.0305066	-0.123443	0.0527372	-0.042383	0.0256969	0.0173397	0.0109759	-0.0108906	-0.0191613	-0.00158607	0.0188545	0.0145792	-0.0100143	-0.0224448	-0.00472386	0.0201071	0.0186999	-0.00849126	-0.0258599	-0.00863435	0.0209718	0.0233345	-0.00618717	-0.0293139	-0.0134048	0.0213001	0.0284594	-0.00295882	-0.0326836
Fert2_306.03	-0.031949	0.0857046	-0.0124128	-0.10488	0.00949591	-0.101077	0.0450664	0.0440223	0.0537384	-0.192708	0.183575	0.0079657	0.202206	0.0207233	-0.573364	0.15201	-0.0214839	0.0103814	0.0669908	9.19369e-05	0.0735431	-0.00270209	-0.0778772	-0.0034931	0.00630815	0.0271247	0.00839521	-0.0231763	-0.0210273	0.0118061	0.027133	0.00285771	-0.0262369	-0.017008	0.0169212	0.025954	-0.00298586	-0.0282199	-0.0121331	0.0214223	0.0236033	-0.00888762	-0.0290024	-0.00660075	0.0251003	0.020146	-0.014587	-0.0285138
Ptgr2_637.467	0.113632	0.0152203	-0.138992	-0.103225	-0.118873	-0.0890013	0.211416	-0.0235083	0.256877	-0.11492	-0.0220061	0.0815298	0.074548	0.0919305	-0.327665	-0.117724	0.00358463	-0.0151387	-0.0376056	-0.0100606	0.116412	0.104594	0.0790196	-0.164746	0.00482826	0.0168376	0.00439359	-0.01593	-0.0138499	0.00928679	0.0200937	0.00142315	-0.0212651	-0.013621	0.0150722	0.0231232	-0.00314972	-0.0272983	-0.0120327	0.0223006	0.0255444	-0.00970986	-0.0338196	-0.00856702	0.0310129	0.0268442	-0.0186581	-0.0404654
Zbtb7b_293.438	-0.0306358	0.224763	-0.0698873	-0.204328	-0.213896	0.162385	-0.099176	0.0538298	-0.00538413	-0.0796435	0.239763	0.0196432	0.137106	-0.256014	-0.254457	0.216979	-0.0139612	0.152048	0.0285346	-0.51931	0.247776	0.0359941	-0.106855	0.0616155	0.101134	0.0633477	-0.0678233	-0.118783	-0.00835895	0.110496	0.085197	-0.0624227	-0.141519	-0.0283526	0.118251	0.110098	-0.0525971	-0.165638	-0.0539633	0.1236	0.137918	-0.0374381	-0.190477	-0.0861173	0.125578	0.168378	-0.0160399	-0.215077
Nudt16l1_583.566	0.135384	-0.0852157	0.142474	-0.292377	-0.0715714	-0.0490057	0.0795109	0.126408	-0.148589	-0.020058	-0.047725	-0.0172883	0.114152	0.0233871	0.156568	0.175127	-0.0221094	-0.0361635	-0.278497	0.0417979	-0.352006	0.121417	0.0621915	0.0795685	0.0495345	0.101776	0.0109413	-0.0946825	-0.0615634	0.051	0.0818217	-0.00204881	-0.081324	-0.0419356	0.0497584	0.0644859	-0.0108676	-0.0685911	-0.0268422	0.0467249	0.0497203	-0.0164132	-0.0568708	-0.0154552	0.0425979	0.0373807	-0.0194617	-0.0463712
Metap1_762.826	0.0300135	0.0606549	-0.026877	-0.150824	-0.0116541	0.0561465	0.0250023	0.0297823	-0.0334921	-0.0925832	-0.00463031	0.0276622	0.0314787	-0.144472	0.131483	0.17429	0.043806	0.059712	-0.094944	-0.14607	-0.151688	0.00519836	0.0402023	0.0799291	0.0528389	0.0710418	-0.00858911	-0.0760373	-0.0355241	0.0489439	0.0610204	-0.010898	-0.0669868	-0.0281632	0.0451025	0.0522272	-0.0124819	-0.0588831	-0.0220413	0.0413675	0.0445375	-0.0134797	-0.0516453	-0.0169712	0.0377784	0.0378348	-0.0140094	-0.0451967
Gpr137_181.44	0.067044	0.122355	-0.191418	-0.0690752	-0.0736129	-0.0599864	0.0502492	-0.183754	0.00745465	0.0376787	0.361184	0.0428203	-0.00129951	-0.189981	-0.311806	0.300565	0.0503459	-0.154468	0.256633	-0.465351	0.0692899	0.0458602	-0.0202483	0.0423684	0.168812	0.131391	-0.0772673	-0.178202	-0.035528	0.121997	0.104534	-0.047811	-0.130387	-0.0344174	0.0871823	0.082328	-0.0285073	-0.0953307	-0.031329	0.061628	0.064255	-0.0160082	-0.0695692	-0.0273866	0.0430889	0.0497418	-0.00806725	-0.0506297
Klf9_352.923	-0.375533	0.0862783	-0.0910801	0.160917	0.238599	0.163009	-0.0161882	0.140047	-0.0493368	-0.0785467	-0.038612	-0.379693	-0.0940916	-0.129282	-0.277424	-0.657679	-0.0552441	0.629755	0.305963	0.356194	0.0625492	-0.0809803	-0.136601	-0.269883	-0.00434134	0.02401	0.0163289	-0.0166346	-0.0251575	0.00448864	0.02739	0.00909712	-0.0238597	-0.0211891	0.0136297	0.0279584	3.61484e-05	-0.029051	-0.0143664	0.0220614	0.0253692	-0.0100083	-0.0313729	-0.00522805	0.0287601	0.0195874	-0.0199725	-0.0302516
Tnpo2_250.161	0.103326	-0.0633044	-0.0513788	-0.408939	0.119226	0.0582018	0.0769321	0.263155	0.0185657	-0.117664	0.0498561	0.046739	-0.126066	-0.121024	-0.490704	0.0455361	0.145056	0.151774	0.185797	-0.508677	0.413468	0.00151114	-0.0149339	-0.141905	0.0430498	0.0929234	0.00920766	-0.105663	-0.0739604	0.0687377	0.118412	-0.00404952	-0.147986	-0.0830633	0.104693	0.148312	-0.0271807	-0.205166	-0.0884128	0.153704	0.182318	-0.0652994	-0.282214	-0.0863967	0.218764	0.219504	-0.126203	-0.386083
Sdc1_20049.188	-0.0362792	0.00355099	0.115558	-0.095191	-0.00134589	0.0460285	-0.00314483	-0.0269471	-0.0730346	0.0129202	0.0374077	0.0281452	-0.0654081	-0.106114	-0.0235135	0.196889	0.0854772	-0.00368413	-0.000491847	-0.104623	-0.022457	-0.0602511	-0.0178913	0.0732446	0.00493671	0.0227587	0.00754955	-0.0212727	-0.0205476	0.0117484	0.0290278	0.00360286	-0.03077	-0.0214765	0.0214528	0.0354811	-0.00352223	-0.0424293	-0.0200258	0.0346062	0.0413671	-0.0150205	-0.0560864	-0.0148102	0.0516482	0.0455186	-0.0323285	-0.0711648
AI846148_190.65	0.035305	0.170917	-0.153218	-0.372587	0.112312	-0.126516	-0.0457936	0.173047	-0.109985	-0.242311	0.287497	-0.05854	0.341804	-0.15388	-0.264521	0.0199582	0.0680332	0.0435229	0.0837383	-1.01301	0.513203	0.0182889	0.227795	-0.194132	0.0933302	0.0835398	-0.0522811	-0.140919	-0.034152	0.125301	0.123722	-0.062472	-0.20444	-0.0627745	0.166532	0.180683	-0.0715661	-0.298108	-0.109902	0.218809	0.259869	-0.0767338	-0.439263	-0.187379	0.283786	0.367431	-0.0730364	-0.660338
Fbxl20_341.478	0.112221	0.0163398	-0.00736982	-0.175126	-0.220603	-0.0125689	0.214521	-0.0410052	-0.0367302	-0.118792	0.0488542	0.225973	0.194993	-0.143858	-0.238648	0.261485	0.0155572	-0.222768	0.0206495	-0.219871	0.108065	-0.0235954	0.0645483	0.00182302	0.121686	0.166925	-0.0142533	-0.178311	-0.0847938	0.10102	0.127834	-0.0187195	-0.137518	-0.0588063	0.0832252	0.0972443	-0.0203862	-0.106062	-0.0402982	0.0680971	0.0735106	-0.0202829	-0.0817505	-0.0271643	0.0553757	0.055235	-0.0191262	-0.0629395
Vps26b_402.405	0.0839964	-0.0732594	-0.00301586	-0.136744	0.0382571	0.0528281	0.0969849	0.0132962	-0.286986	0.000702198	0.0181115	0.0330024	0.126593	-0.001735	-0.230065	0.396464	-0.0302767	-0.0671015	-0.0495223	-0.240309	0.0318923	0.0805602	-0.0877389	0.0792612	0.0839313	0.0617263	-0.0459383	-0.0961694	-0.0159401	0.0806239	0.0688043	-0.0373063	-0.0982146	-0.0257542	0.0764125	0.075254	-0.0281778	-0.0992112	-0.0355261	0.0713187	0.0810051	-0.0186497	-0.0991285	-0.0451472	0.0653731	0.0859932	-0.00882327	-0.097949
Armc5_200.462	0.0298588	-0.00319475	0.103	-0.244481	-0.0787685	-0.0807989	0.157234	0.12214	0.113847	-0.0755008	-0.157614	-0.0196032	0.072843	0.0690122	-0.412783	0.0494805	0.305009	0.0303078	0.0286575	0.0198497	-0.357757	0.0741326	0.0447199	0.0159797	0.00977053	0.0702783	0.028461	-0.0604199	-0.063149	0.0277253	0.0771172	0.0136994	-0.0767363	-0.0557187	0.0472044	0.080342	-0.00514139	-0.0913033	-0.0431187	0.0672282	0.0790431	-0.0277498	-0.102698	-0.0252714	0.0866333	0.0723823	-0.053488	-0.109413
Fam219b_129.466	0.0663675	-0.00836677	-0.151856	-0.309982	0.139893	-0.103045	0.386981	0.0754685	0.140872	-0.449197	-0.0309493	0.28442	0.0228577	-0.203051	-0.657118	0.328747	0.0525454	-0.141654	0.138131	-0.0188658	0.0922819	0.196766	-0.221881	-0.0731439	0.200002	0.0985717	-0.146576	-0.208021	0.00410549	0.179486	0.120468	-0.104283	-0.204179	-0.0316708	0.155199	0.135069	-0.0646945	-0.192916	-0.0622955	0.128325	0.14298	-0.0288172	-0.175769	-0.0870798	0.100023	0.144883	0.00267565	-0.154326
Gid8_653.175	0.0841007	-0.0514093	-0.0253203	-0.0725229	-0.097625	-0.0252556	0.118444	0.0272603	0.0212669	0.0127569	-0.028359	0.185172	0.0688331	-0.0519998	-0.265139	-0.0732992	0.0525115	-0.164759	0.0872182	-0.0613571	0.18391	0.13651	-0.0346441	-0.118756	0.028598	0.0447031	-0.00238436	-0.0490267	-0.0268509	0.0332296	0.0468944	-0.00590514	-0.0536338	-0.0258975	0.0382477	0.0489611	-0.00993779	-0.058435	-0.0245266	0.0436609	0.0508635	-0.0145258	-0.0634116	-0.0226866	0.0494755	0.0525572	-0.0197145	-0.0685399
Gnaq_1174.245	0.0778421	-0.0943727	-0.201561	-0.0685039	-0.0778805	-0.133098	0.270295	0.314487	0.0480596	-0.0404758	0.119447	0.0741516	-0.177018	-0.124824	-0.910214	-0.0405364	-0.00569115	-0.0798411	0.468528	0.000674139	0.424075	-0.00544367	-0.0641093	-0.315597	-0.00354144	0.0347391	0.0221625	-0.0270703	-0.0390827	0.00912752	0.0463201	0.0145979	-0.0445775	-0.0396646	0.0273189	0.0562517	-0.000120044	-0.0643552	-0.0332884	0.0508134	0.0618733	-0.0237	-0.0840373	-0.017188	0.0783502	0.0597393	-0.0573671	-0.0997502
Nck1_39.58	-0.105113	0.130786	-0.0179808	0.00454187	-0.018424	-0.00370507	0.0776275	-0.0572118	-0.268834	-0.155799	0.340776	0.0107177	-0.063806	0.0155041	-0.00458789	0.0823012	0.0971551	-0.153312	-0.13267	-0.028724	-0.128924	0.398306	-0.266275	0.0477642	0.0672706	0.107729	-0.00154509	-0.113268	-0.0631464	0.0677184	0.0966394	-0.00893971	-0.105481	-0.0513791	0.0673337	0.0861665	-0.0150823	-0.0977142	-0.0409623	0.066253	0.076334	-0.0200918	-0.090059	-0.0317875	0.0645981	0.0671549	-0.0240834	-0.0825904
Ndufb6_13239.97	0.0503031	0.0640526	-0.126662	-0.0691271	-0.0836501	0.0121097	-0.0697245	0.127039	0.120369	-0.0663498	0.0167733	-0.0511713	0.227498	0.113639	-0.0900905	-0.477937	-0.0469885	0.0592894	0.0180559	0.107523	-0.0327487	0.190864	-0.0263129	-0.115522	0.00958904	0.00960003	-0.00451265	-0.0142843	-0.00455132	0.013238	0.0142971	-0.00551576	-0.0205142	-0.00763102	0.0181893	0.0211863	-0.00651773	-0.0294056	-0.0125056	0.0248617	0.031237	-0.00732426	-0.0420866	-0.0201483	0.033783	0.0458134	-0.00757341	-0.060176
Apobec1_60.868	-0.444718	0.527802	-0.248431	0.126951	-0.168712	0.111331	-0.0401195	-0.241245	0.147416	-0.00857088	0.198308	0.204952	0.202105	-0.817284	-0.83363	-0.0687161	0.196766	0.297455	0.113556	0.248951	0.0489311	0.099457	-0.336386	-0.114156	0.00834396	0.0148569	6.13553e-05	-0.0163555	-0.0101166	0.0114984	0.018	-0.00144888	-0.0208121	-0.0111858	0.0156085	0.0216625	-0.00369504	-0.0263355	-0.0120916	0.0209189	0.0258848	-0.00693427	-0.0331471	-0.0126827	0.0277258	0.030692	-0.0115011	-0.0415059
Lmna_5106.337	-0.0170657	0.0920815	-0.126999	0.0237012	0.028189	-0.103085	-0.0176985	0.105067	0.0245338	-0.245204	0.0559297	0.0541869	-0.0107108	0.285093	-0.145275	-0.0909719	-0.0115491	-0.0445971	0.102687	-0.394974	0.321063	-0.0496345	0.0435918	-0.0519639	0.00140657	0.0316323	0.0148651	-0.0230414	-0.0261062	0.00857765	0.0287371	0.00656699	-0.0245054	-0.0187623	0.013592	0.0245007	-0.000428616	-0.0239546	-0.0117345	0.016585	0.0194932	-0.00591041	-0.021863	-0.00543852	0.0177958	0.0142171	-0.00981663	-0.0187118
Ttc14_119.816	0.074245	0.0925034	-0.201462	-0.0138235	-0.0500594	-0.20622	-0.0530863	-0.0145827	0.194637	-0.175398	0.134346	0.165867	0.141465	0.247618	-0.626212	-0.15237	-0.15817	0.37688	0.0188025	0.16864	-0.511225	0.153425	-0.105735	0.100356	0.025977	0.0313309	-0.00781803	-0.0395157	-0.0167419	0.0308034	0.037344	-0.00915524	-0.0472019	-0.0201446	0.0365143	0.0444927	-0.0107183	-0.0564119	-0.0242426	0.0432671	0.0529838	-0.0125448	-0.0674603	-0.0291803	0.0512454	0.0630593	-0.0146787	-0.0807326
Kat2a_671.721	-0.0351685	-0.0274272	0.154403	-0.177509	-0.0627828	0.117245	-0.0246301	0.113113	0.0293237	0.0522631	0.0318684	-0.212381	0.00952718	-0.0760378	-0.0614935	-0.029266	-0.156234	0.167987	0.109535	0.175418	-0.0548233	-0.116841	0.011196	-0.0277703	0.000870036	0.0442065	0.0220846	-0.0329869	-0.0391621	0.012076	0.0435079	0.010793	-0.0382885	-0.0304042	0.0214451	0.0400948	-0.000280222	-0.0406236	-0.0204903	0.0285654	0.0344107	-0.0104325	-0.0400897	-0.0101846	0.0332044	0.0269999	-0.01907	-0.0369773
Sec22c_85.265	-0.14593	0.202374	-0.366238	-0.099347	0.107611	0.0765585	0.432679	0.283619	-0.0784526	-0.413821	-0.102192	-0.0999693	0.0307917	-0.194788	-0.632285	0.343074	-0.06325	0.144427	0.100934	0.0365872	0.234896	-0.0710231	0.0971848	-0.309083	0.178953	0.278719	0.0037121	-0.292351	-0.156884	0.14074	0.196209	-0.0127749	-0.202909	-0.0961243	0.108859	0.136163	-0.0197324	-0.141324	-0.0581404	0.0830133	0.0933006	-0.0213011	-0.0985055	-0.0343946	0.0625333	0.0631958	-0.0200679	-0.0685877
Zfp467_41.868	0.0280027	0.079652	-0.0648477	-0.164123	-0.052882	-0.0391018	0.0909062	-0.108423	0.0449138	-0.0116292	0.180892	0.0089329	-0.0871033	-0.169725	-0.0964273	0.496027	-0.199607	-0.281969	0.245629	-0.463473	0.137628	0.275103	-0.158323	-0.00667759	0.024225	0.0201979	-0.0140529	-0.0339359	-0.00752023	0.0332771	0.032194	-0.0161547	-0.0500673	-0.0162711	0.045016	0.0502963	-0.0169896	-0.0732687	-0.0313008	0.0598317	0.0771439	-0.0149498	-0.106451	-0.0564795	0.0778849	0.116226	-0.0072996	-0.153714
Prpf39_320.828	0.0408807	0.00600968	-0.0346133	-0.0351492	-0.108514	0.0681671	0.0877545	-0.0552198	-0.0245031	-0.110617	-0.00671381	-0.149264	0.17829	0.159876	-0.10006	-0.0816499	0.336259	-0.0315546	0.0165414	-0.276666	-0.266468	0.10064	0.119663	0.0181986	0.000888128	0.000944191	-0.000366615	-0.00131492	-0.00047251	0.00116571	0.00131977	-0.000426914	-0.00178072	-0.000718376	0.00152528	0.00183962	-0.000482485	-0.00240705	-0.00107771	0.00198905	0.00255745	-0.000522139	-0.00324765	-0.00159932	0.00258439	0.00354632	-0.000527351	-0.00437367
Zdhhc3_619.859	0.0845541	0.138166	-0.0528621	-0.406702	-0.057847	-0.0143969	0.0943096	0.1903	0.0149422	-0.231409	0.0605352	0.113364	0.0794906	-0.202769	-0.0479016	0.383995	-0.0374198	-0.10221	-0.0968761	-0.359767	0.0561916	0.138859	0.0237216	-0.0012487	0.0358238	0.188952	0.0720965	-0.181566	-0.183248	0.0810706	0.210481	0.0377539	-0.234347	-0.169627	0.131768	0.225641	-0.00920725	-0.288013	-0.14191	0.186161	0.232124	-0.0703057	-0.338867	-0.0988556	0.24207	0.227391	-0.14691	-0.38198
Lamc2_314.062	-0.0406766	0.243112	-0.168098	-0.0919373	-0.0326675	0.0113799	0.0416328	0.0333275	-0.199423	0.0693887	0.0616557	0.0743891	0.0335842	0.0158952	-0.00200552	-0.01845	-0.0317705	-0.040299	-0.0423678	0.0460152	-0.0204546	0.00617692	-0.114152	0.100628	0.0887739	0.0935319	-0.0207921	-0.0938023	-0.0346209	0.0541455	0.0579199	-0.0119993	-0.0562454	-0.0214196	0.0328642	0.035694	-0.0069154	-0.033898	-0.0132677	0.0198857	0.0219291	-0.00397664	-0.0204904	-0.00822259	0.0120089	0.0134459	-0.00228019	-0.0124074
Lsm14a_2116.953	0.00960295	-0.0709278	0.0693427	-0.129169	0.0295729	0.0140438	0.057424	0.134206	0.0297694	-0.00238062	-0.0550079	-0.0648279	0.0483509	-0.0657147	-0.280498	-0.0844652	0.0957635	0.176236	0.0492343	-0.012822	0.0913066	-0.0197452	-0.0293369	-0.0600558	-0.00196322	0.0121147	0.00895234	-0.00965989	-0.0160652	0.00277737	0.0204483	0.00789453	-0.0204161	-0.0206604	0.0129572	0.0312551	0.00169553	-0.0372812	-0.0222767	0.0315397	0.0431421	-0.0142532	-0.0613173	-0.0159044	0.0617166	0.0523293	-0.0469775	-0.0917056
Pafah1b1_1602.119	0.0861313	-0.0110518	0.0326218	-0.335001	0.0655131	0.125413	0.0410856	-0.00922177	-0.0758825	-0.0559076	0.00792453	0.097823	-0.0443773	0.014472	-0.148856	0.284519	-0.00922857	-0.0214989	0.00994366	-0.14792	-0.00114978	-0.153359	0.0507701	0.0868047	0.11224	0.106653	-0.038232	-0.126902	-0.0398124	0.0824692	0.083557	-0.0243146	-0.0942931	-0.0336789	0.0602236	0.0651561	-0.0149558	-0.0701135	-0.0280864	0.043725	0.0505939	-0.00873812	-0.0521317	-0.0231546	0.0315684	0.0391371	-0.00467682	-0.0387376
Habp4_104.264	-0.169688	0.139416	0.227483	-0.560654	0.294017	-0.0244183	-0.0291676	0.0382746	0.0322416	-0.170875	-0.0788057	-0.0545553	0.186718	0.243826	-0.661055	-0.238964	0.301473	0.162936	0.308948	-0.307839	-0.286705	0.244239	-0.0740337	-0.0453714	0.0217909	0.0223953	-0.0103701	-0.0344927	-0.0115988	0.0321106	0.0360101	-0.0131826	-0.0535475	-0.0213211	0.0469634	0.0574223	-0.0158988	-0.0831111	-0.0381938	0.0680886	0.090715	-0.0175548	-0.129226	-0.0672659	0.0977039	0.141728	-0.0161725	-0.20194
Dcaf8_148.922	-0.045303	0.222443	0.0346857	-0.388854	-0.228522	0.107031	-0.104269	0.471511	-0.105209	-0.023239	-0.0563359	-0.152846	0.160972	-0.0666752	-0.18819	-0.132181	0.277558	0.236332	-0.10542	-0.202634	-0.41686	0.180933	0.294847	-0.163555	-0.023847	0.25988	0.162961	-0.22187	-0.318505	0.0633314	0.29721	0.100781	-0.321284	-0.284184	0.155906	0.315836	0.0126968	-0.41352	-0.215389	0.246556	0.31114	-0.101894	-0.484087	-0.116264	0.328121	0.278604	-0.2415	-0.516684
Hnrnpab_79.387	0.0415408	0.0795462	-0.172787	-0.171979	0.0756925	-0.0720098	-0.00417953	0.234578	0.0851789	-0.136311	-0.0352792	0.0526831	0.0738892	0.116217	-0.30003	-0.393541	0.0712842	0.318036	-0.0208909	-0.288791	0.192687	0.0768934	0.146554	-0.21622	-0.00142072	0.0142176	0.00963116	-0.0118562	-0.0183148	0.00406581	0.0239599	0.00852844	-0.0245084	-0.0240192	0.0158837	0.0370676	0.00169141	-0.0449191	-0.0269098	0.0378591	0.0524643	-0.0164919	-0.0753383	-0.0213002	0.0745714	0.0664907	-0.0552235	-0.116613
Sox13_265.684	-0.104948	0.192118	-0.107756	0.0174505	-0.0607043	-0.0037073	0.033831	0.0174528	-0.0297398	-0.128316	0.0128771	0.219198	0.115912	-0.0567823	-0.470411	0.0318719	0.0792992	0.0572806	0.22027	-0.189691	0.0919556	-0.0594156	-0.0539068	0.0159852	-0.00678695	0.0366321	0.0269445	-0.0275527	-0.0456662	0.00688395	0.053124	0.0206845	-0.0506326	-0.0505449	0.029329	0.0697053	0.00444599	-0.0800111	-0.0468608	0.0616977	0.0826486	-0.0260829	-0.113508	-0.0289187	0.103625	0.0862591	-0.0756268	-0.145847
Slc39a14_152.156	-0.116972	-0.0904368	0.0417987	0.117554	-8.91795e-05	0.203768	-0.0894709	0.21807	-0.174608	-0.228765	0.144452	-0.106878	0.0685328	0.0112847	-0.475501	-0.167541	0.139523	0.257486	0.00328222	0.00417811	0.217527	0.00846244	-0.0417143	-0.171248	0.0204221	0.0276177	-0.00245751	-0.0267536	-0.0131108	0.0162484	0.0209995	-0.00252867	-0.0206377	-0.00955527	0.0128993	0.0159421	-0.00243313	-0.0159134	-0.0069405	0.0102197	0.0120849	-0.00224439	-0.0122644	-0.00502167	0.0080815	0.0091481	-0.00201094	-0.00944662
BC025446_64.973	0.119537	0.0392029	-0.227829	-0.0140138	-0.178888	0.176439	0.10502	0.10783	-0.390683	-0.00100216	0.0397128	-0.0286206	0.111684	-0.079222	0.104133	0.0789709	0.331207	-0.0753117	-0.232438	-0.160314	-0.116921	-0.0903297	0.0321441	0.149904	0.165934	0.113355	-0.0890852	-0.174046	-0.0257199	0.128742	0.105783	-0.0547141	-0.142271	-0.0378545	0.0974636	0.0957641	-0.0297223	-0.114458	-0.044077	0.0717093	0.0845586	-0.0119596	-0.0906194	-0.0460348	0.0509475	0.0730708	0.000266729	-0.0705537
Amigo1_23.978	-0.0371901	0.0305152	0.0799176	-0.414628	0.130622	0.135329	0.128541	0.0816687	-0.510162	0.0562315	0.0204872	-0.0182408	0.135337	-0.0978396	-0.609087	0.68623	0.0796633	0.0314191	-0.228012	-0.231225	0.0148821	0.0320541	0.00617902	-0.0150353	0.10708	0.0842566	-0.0583689	-0.134879	-0.0274521	0.111233	0.102415	-0.0496647	-0.150896	-0.0464193	0.113676	0.121854	-0.0379161	-0.166726	-0.0686927	0.113991	0.142377	-0.0228125	-0.18189	-0.0945456	0.111706	0.163736	-0.00407888	-0.195805
Rps20_60092.691	-0.00912224	0.0276884	-0.0721561	0.0177307	-0.011395	0.00285682	0.0258324	0.0511618	0.0595028	-0.00782542	-0.0340351	-0.03825	0.0251657	0.0355007	-0.0752608	-0.203641	0.0197484	0.0564375	0.0392829	0.0750539	0.0408182	0.0301612	-0.0177824	-0.0655864	0.000478236	0.0011835	0.000176489	-0.00128812	-0.00101491	0.000884858	0.00175112	5.18825e-05	-0.00203795	-0.00133695	0.00156719	0.00255745	-0.00024892	-0.00318188	-0.0016971	0.00268861	0.00368299	-0.000869064	-0.00490676	-0.00204249	0.00449917	0.00522199	-0.00204696	-0.00747739
Zfp937_98.485	0.0227221	0.0237726	-0.0734365	0.069504	-0.057378	-0.099083	0.0567337	-0.0956437	-0.0321108	-0.0192955	0.134985	0.00829367	0.249553	0.125653	-0.38845	-0.0304183	0.000413817	-0.137574	0.0614241	0.0929853	-0.126307	0.158167	-0.0198927	-0.046983	0.00903774	0.00565731	-0.00496852	-0.00876034	-0.00101761	0.00770066	0.00607916	-0.00339071	-0.00812171	-0.00211049	0.00637379	0.00624464	-0.00199638	-0.00735555	-0.00294494	0.00509465	0.00619492	-0.000793873	-0.00650777	-0.0035422	0.0038927	0.00597008	0.000215704	-0.00561845
Rraga_1639.719	0.10549	0.0836004	0.0919175	-0.576625	0.0510008	-0.183731	0.180954	0.027869	0.106839	0.0511329	-0.0363161	0.109394	-0.0373316	0.0235778	-0.120699	0.22516	-0.102995	-0.0958432	-0.367467	-0.021847	0.263393	0.0606088	-0.103556	0.0162127	-0.000573819	0.0060521	0.00390526	-0.00467332	-0.00689983	0.00149956	0.00847232	0.00290245	-0.00794644	-0.00753723	0.0047904	0.0109421	0.000562081	-0.012015	-0.0070962	0.00951656	0.0129956	-0.00363116	-0.0166317	-0.00487276	0.015761	0.0139101	-0.010201	-0.021248
Gata4_40.958	0.0693349	0.121242	-0.292022	-0.087044	-0.117487	0.0423322	0.0604424	0.148125	-0.0633934	-0.0540642	-0.0717427	0.0720741	0.488614	-0.415287	-0.195317	0.258718	-0.496739	0.0993933	0.0676623	-0.236529	0.111279	0.300706	-0.0204907	-0.181088	0.0514773	0.0193335	-0.0414263	-0.0511613	0.00617969	0.0562123	0.0349253	-0.0348153	-0.0636354	-0.00935402	0.0574253	0.0516368	-0.0233372	-0.0739926	-0.0286332	0.0540378	0.068343	-0.00674964	-0.080647	-0.051094	0.0450236	0.0836535	0.0147743	-0.0819078
Carhsp1_3330.053	0.0461049	0.0103294	0.000477231	-0.251842	0.0842642	0.0529627	0.0663299	0.127434	-0.0383322	-0.263647	-0.00882686	-0.0207095	-0.0352427	-0.00524722	0.0261421	0.268174	0.0835999	0.0972121	-0.101222	-0.276587	-0.0761974	-0.0458283	0.0527239	0.0845766	0.0608797	0.109256	0.00608578	-0.108372	-0.0673341	0.0601828	0.0946809	-0.00220046	-0.0975204	-0.0530562	0.0585151	0.0814932	-0.00862716	-0.0872342	-0.0410398	0.0561224	0.0696423	-0.0134729	-0.0775891	-0.0309858	0.0532088	0.0590633	-0.0169887	-0.0686288
Ddx46_451.3	0.040799	-0.0667089	-0.0902552	-0.0277262	0.185992	0.0661605	-0.129455	0.0828367	-0.0111767	-0.078979	0.0180236	-0.063462	0.0549496	0.0162594	0.0253643	-0.142532	-0.150166	0.198728	-0.00656163	0.0746833	-0.0111092	-0.011431	-0.00516597	-0.0324989	0.0206722	0.0107642	-0.0156039	-0.0238893	-8.61759e-06	0.02651	0.0196806	-0.0156366	-0.0342992	-0.0075439	0.0323497	0.032351	-0.0127906	-0.0471425	-0.0200894	0.0371378	0.0495229	-0.00520596	-0.0620719	-0.0396448	0.0391414	0.0717286	0.00959128	-0.0780156
Cdc37l1_35.959	-0.0605375	-0.172235	0.167624	-0.0951487	-0.0538893	0.0200763	0.199479	0.167976	-0.226392	0.034044	-0.266633	0.197602	0.268337	-0.0882209	-0.926817	-0.261881	0.214633	0.399452	0.0080111	0.103217	-0.0460519	0.23092	-0.130549	-0.203377	0.0127439	0.0378176	0.00861148	-0.0397794	-0.0345276	0.0244579	0.0537775	0.00494723	-0.0619553	-0.0436295	0.0434513	0.0750369	-0.00400936	-0.0950434	-0.0527462	0.073233	0.102568	-0.0222505	-0.144064	-0.0596943	0.118471	0.137021	-0.0563867	-0.21646
Cd2ap_9803.798	0.053419	-0.0408528	-0.0561171	-0.082132	-0.0728052	0.0199844	0.0568769	0.0969463	0.111697	-0.0539459	0.00999704	0.0843938	0.0682061	0.0657799	-0.686233	-0.0832365	0.0525025	0.0964566	0.128974	0.0881812	0.119166	-0.0201802	-0.0455868	-0.0986548	0.0109323	0.0151884	-0.00186274	-0.017201	-0.00882158	0.0122648	0.0168114	-0.00223418	-0.0191708	-0.00966135	0.0137567	0.0186051	-0.00266531	-0.0213662	-0.010578	0.0154266	0.020587	-0.00316485	-0.0238132	-0.0115782	0.0172954	0.0227762	-0.00374269	-0.0265409
Myl12b_54.796	-0.0572416	-0.0998214	0.317024	-0.301223	0.071136	0.235276	-0.035229	-0.147701	-0.107628	-0.224948	-0.0428428	0.124125	0.172065	-0.146983	-0.095469	0.247862	0.189051	-0.250816	0.006873	0.0325947	0.0764149	-0.421657	0.0560007	0.132303	-0.00638082	0.0548365	0.036312	-0.0418983	-0.0635027	0.0118048	0.0722074	0.0263597	-0.0680937	-0.0659844	0.0375791	0.0878937	0.00685617	-0.0983972	-0.0594698	0.0708154	0.0987865	-0.0247519	-0.130258	-0.0402876	0.110236	0.100845	-0.0708274	-0.15922
Mrrf_499.302	-0.0923735	-0.029081	0.164458	-0.0594616	-0.00513945	0.101756	0.0192477	0.0191781	-0.167105	-0.0158797	0.114032	-0.142211	-0.131575	-0.197288	0.0174934	0.316803	0.0597609	0.180787	-0.127351	0.0455754	-0.181303	-0.0907587	-0.0106207	0.0805542	-0.00077057	0.0189921	0.0110826	-0.0145543	-0.0198533	0.00487793	0.0235566	0.00754307	-0.0215215	-0.0197436	0.0122614	0.0273744	0.00170049	-0.0289704	-0.0173795	0.0212532	0.029729	-0.00676322	-0.0362574	-0.0121155	0.0315015	0.0297711	-0.0180147	-0.0424812
Cdc42se1_1115.258	0.0289139	0.0630425	-0.0748815	-0.094919	0.079342	0.0391309	-0.0482991	-0.0122243	-0.133455	-0.167063	0.0859097	0.053694	0.100891	-0.0316109	0.0845034	0.229782	0.0173091	0.0152203	-0.124062	-0.32535	-0.0652476	0.0683634	0.0255281	0.0851738	0.0857753	0.0582575	-0.0555015	-0.107598	-0.0141399	0.0998732	0.0861918	-0.0509262	-0.139177	-0.0400293	0.11257	0.121086	-0.0388815	-0.175666	-0.0775275	0.121993	0.163341	-0.0165223	-0.216251	-0.130345	0.12553	0.212925	0.0193398	-0.259047
Ptpn14_37.372	-0.288059	0.350413	0.0493922	-0.790529	0.307888	0.247369	0.294948	-0.0895523	-0.18223	-0.400668	0.0158323	0.433125	-0.0289392	-0.124984	-0.682058	-0.0833328	-0.0407473	0.189569	-0.190754	0.149881	0.538243	-0.246135	0.0308593	-0.282784	0.144646	0.118641	-0.0717998	-0.179872	-0.0421599	0.134467	0.128181	-0.0530124	-0.178179	-0.0596856	0.122926	0.135968	-0.0342869	-0.174269	-0.0762485	0.110164	0.14198	-0.0158478	-0.168264	-0.0916411	0.0963308	0.146211	0.00209793	-0.160311
Fbxo32_99.358	-0.106752	-0.157754	0.195395	0.131152	-0.00667432	0.161228	-0.10718	0.00635064	-0.456245	-0.133768	-0.0261241	0.330885	0.177279	-0.0759433	-0.088783	-0.498014	0.48201	-0.109607	0.0606078	-0.0741649	0.045665	0.00400272	-0.148441	0.0380694	-0.0135254	0.14971	0.0889075	-0.106455	-0.144798	0.0273657	0.136877	0.0451939	-0.116819	-0.103042	0.0548035	0.116778	0.00830596	-0.114824	-0.0645591	0.07056	0.0926431	-0.0203104	-0.10386	-0.0315496	0.0766636	0.0672402	-0.0402232	-0.0872799
Acrbp /// Ing4_694.761	0.0998472	-0.0423741	0.160946	-0.10177	-0.187051	-0.0459653	-0.160946	-0.0748216	-0.0438389	0.106167	0.0307372	0.119232	0.0746403	0.00736259	0.104397	0.37413	-0.108845	-0.188693	-0.113569	-0.196461	-0.201226	-0.0214387	0.103217	0.140188	0.0198597	0.0174184	-0.0100794	-0.0266567	-0.00718119	0.0241432	0.0246175	-0.0098405	-0.0347701	-0.0129913	0.0288704	0.0341624	-0.00842177	-0.0448791	-0.0214741	0.0338633	0.0466479	-0.00516774	-0.0573168	-0.033621	0.038799	0.0627601	0.000825791	-0.072404
Endod1_513.112	-0.00259652	0.154246	-0.0338143	-0.090601	-0.186614	0.0290173	0.0521141	-0.0606472	-0.0202468	-0.109467	0.150145	0.190203	-0.00236208	-0.111569	0.02689	0.144345	-0.0166893	-0.110961	0.0454898	-0.275708	0.0350624	0.052949	-0.00405327	0.0497408	0.0397038	0.162343	0.0526231	-0.126688	-0.113213	0.0482076	0.114885	0.0189725	-0.0969657	-0.066335	0.0470949	0.0786402	0.000136766	-0.0717111	-0.0365997	0.0414068	0.0519933	-0.00916633	-0.0514833	-0.0182388	0.0340831	0.0330792	-0.0127094	-0.0359519
Bdh1_40.608	0.15991	0.548102	-0.403858	-0.812135	-0.569615	0.55553	-0.183866	-0.228718	-0.133643	0.0205475	0.376855	0.277427	0.239442	0.237358	-0.5302	-0.264805	0.156653	-0.555669	0.436985	-0.428672	-0.279262	0.180226	-0.504566	0.426274	0.348381	0.400378	-0.0842259	-0.561806	-0.218169	0.272558	0.322214	-0.0576621	-0.413639	-0.172438	0.211904	0.257865	-0.0389798	-0.308607	-0.136534	0.163878	0.205383	-0.0258792	-0.232309	-0.108229	0.126175	0.162922	-0.0167456	-0.175963
Uckl1_398.56	-0.00499134	0.000225464	0.139905	-0.0724444	-0.184515	0.0220365	0.0439381	0.0162766	-0.0892765	0.0297342	0.100098	0.0154093	-0.00961905	-0.0434376	-0.18112	0.214963	0.0687766	-0.0369659	0.0818771	-0.167209	-0.09505	-0.00343933	0.0481021	0.032513	-0.013498	0.0741461	0.0509522	-0.050263	-0.0786684	0.0103279	0.0791532	0.0305468	-0.0667927	-0.0651765	0.032278	0.0777443	0.00794973	-0.0774216	-0.0468265	0.0507249	0.0702001	-0.0150006	-0.0813218	-0.0254031	0.0644119	0.0572217	-0.0364049	-0.0783152
Wbp1l_873.766	0.167449	0.0223645	0.0141404	-0.25018	-0.206261	-0.081482	-0.0818944	0.0589463	0.0554278	-0.00154703	0.179665	0.228679	0.133407	-0.123537	-0.280379	0.351283	-0.111919	-0.202153	-0.0397167	-0.331912	0.0729503	0.196934	-0.0121636	0.00611471	-0.0165656	0.0498871	0.0396963	-0.0294362	-0.0535414	0.0025114	0.0505946	0.0222675	-0.0389518	-0.0405745	0.0173541	0.0459572	0.00581806	-0.0424772	-0.0260061	0.0273455	0.0374836	-0.00810853	-0.0407999	-0.0117226	0.0324813	0.0267684	-0.0185063	-0.0351427
Ak3_874.843	-0.0111486	0.00586285	-0.0377732	-0.0413014	0.0539502	0.0962343	0.0358834	0.0249014	-0.055086	-0.256294	0.0143674	0.0278838	0.00804653	0.116583	-0.159066	0.212706	0.0299837	-0.0218841	0.00509769	-0.205267	0.0708712	-0.00482622	0.000835487	0.0144118	0.0399078	0.059167	-0.00386635	-0.0650307	-0.0356348	0.0421721	0.0607005	-0.00524859	-0.0676143	-0.0357591	0.0445265	0.0622484	-0.0067201	-0.070277	-0.0358372	0.0469735	0.0638095	-0.00828502	-0.0730203	-0.0358657	0.0495156	0.0653824	-0.00994766	-0.0758458
Cp_14490.067	0.0901008	-0.138066	-0.11981	0.18234	0.133588	-0.169224	-0.0214079	-0.0219681	-0.00203736	-0.164439	0.0113692	0.0853654	-0.0525788	-0.0206192	0.344962	0.0998615	-0.096575	-0.199779	-0.213067	-0.0451398	0.169779	0.0291292	-0.0330708	0.00474555	-0.00104727	0.0209249	0.0130102	-0.0172265	-0.0250208	0.00592146	0.0317863	0.0111413	-0.0313665	-0.0307617	0.0187884	0.0452583	0.00389182	-0.0521228	-0.0337051	0.0401426	0.0602971	-0.012693	-0.0808263	-0.0298376	0.0727945	0.0743299	-0.0444748	-0.117887
Mmp14_129.85	0.130054	0.0937623	-0.253183	-0.437542	0.1253	-0.334251	0.309748	0.423354	0.158168	-0.562621	0.13426	0.180636	-0.0896416	0.120939	-0.539898	0.281795	-0.330431	-0.230702	-0.0408225	0.262732	0.240008	-0.0710448	-0.00909507	-0.158414	0.0750866	0.138449	0.00900975	-0.148749	-0.0968002	0.0842487	0.139451	-8.00254e-05	-0.156046	-0.0911619	0.0934522	0.13992	-0.009688	-0.163023	-0.0848533	0.102661	0.139828	-0.0198049	-0.169627	-0.0778761	0.111838	0.139148	-0.0304188	-0.175802
Smad3_472.578	-0.0160956	0.0588856	-0.225061	-0.00118451	0.127593	0.0276389	0.106958	0.0775573	-0.0401214	-0.268073	-0.0149759	0.201141	-0.153874	-0.0129712	-0.340931	0.241229	0.00959505	0.0987629	0.139776	-0.346316	0.223919	0.0121233	-0.106644	-0.00568803	0.0221765	0.0415806	0.00241123	-0.0429352	-0.0284522	0.0265466	0.0447851	-0.000194347	-0.0481036	-0.0287924	0.0314405	0.0480542	-0.00332999	-0.0537006	-0.0288223	0.0368974	0.0513594	-0.00706456	-0.0597409	-0.028479	0.0429567	0.0546665	-0.0114738	-0.0662363
Cttn_4940.644	0.0473822	-0.0140613	0.113584	-0.137319	-0.0813692	0.017982	-0.0568174	0.0217584	-0.12602	0.069312	-0.00397011	0.0426245	-0.0417382	-0.0212085	0.130262	0.276687	0.0328949	-0.126552	-0.016687	-0.279663	-0.0462029	-0.0668654	0.0419588	0.125968	0.00283984	0.0275655	0.012319	-0.0221217	-0.025077	0.00898167	0.0303244	0.00752782	-0.0277812	-0.0231193	0.0157306	0.0320418	0.0014781	-0.0330427	-0.0196309	0.022849	0.0324493	-0.00575813	-0.037557	-0.0145276	0.0300422	0.0312939	-0.0140351	-0.0409494
Rab10_7462.239	-0.0179099	-0.0793129	0.00148141	-0.0613495	0.0957873	-0.0361618	0.205128	0.0544834	0.0531328	-0.120709	0.023732	0.0152784	-0.0651434	-0.140515	-0.378774	0.0537487	0.0420602	0.00968551	0.174757	0.116431	0.121562	0.0302726	-0.103793	-0.108049	-0.00495871	0.023389	0.0165787	-0.0148969	-0.0240071	0.00263692	0.0245089	0.00975338	-0.0195204	-0.0194586	0.00934264	0.0234954	0.00265082	-0.0221176	-0.0136649	0.0146823	0.0206083	-0.00411204	-0.02263	-0.00722874	0.0183364	0.0162365	-0.00999057	-0.0211869
Trim46_38.478	0.0512742	-0.0923604	-0.0258618	-0.057825	0.0144263	-0.00604494	0.193692	0.0262697	-0.0892111	-0.133425	-0.152962	0.0744796	0.221306	-0.24624	-0.289424	0.388643	0.0330898	-0.0201014	0.249177	-0.423947	0.0168048	-0.0217739	0.056194	-0.00741853	0.00693476	0.0303644	0.0103345	-0.0285203	-0.0286131	0.0147959	0.0399813	0.00731099	-0.0416764	-0.0328936	0.0265314	0.0513548	0.000939268	-0.0592119	-0.0358245	0.0433943	0.0642574	-0.0105062	-0.0821022	-0.0359461	0.0668299	0.0780989	-0.0294386	-0.111338
Atp1b1_7283.159	-0.00084485	-0.0519854	0.0304998	0.0163556	-0.023601	0.0337506	0.0644042	-0.0932624	0.0120264	-0.0709542	0.0308353	0.107839	-0.086086	-0.123244	-0.136371	0.208169	0.111851	-0.0666262	0.135044	-0.269027	0.145735	-0.0387362	-0.080212	0.0547609	0.0128554	0.00687118	-0.00897504	-0.0140162	-0.000472112	0.014656	0.0111767	-0.00778271	-0.0178789	-0.00453773	0.0158213	0.0163691	-0.00523255	-0.0217513	-0.0100863	0.0159341	0.0223375	-0.000948782	-0.0252367	-0.0172667	0.014484	0.0288422	0.00543886	-0.0277872
Arf3_1198.667	0.0787438	0.00834067	-0.0950348	-0.152964	0.0108533	0.0711713	-0.0235042	0.0401272	-0.0515361	-0.204343	0.0462267	0.157574	0.0119377	0.0791387	-0.277027	0.283314	0.0495572	-0.0875041	0.145656	-0.692887	0.163733	0.171115	0.0362756	-0.0409966	0.0517328	0.0369788	-0.0348981	-0.0715479	-0.0110231	0.0724851	0.0664967	-0.0379012	-0.112389	-0.0363681	0.0977513	0.11284	-0.032907	-0.172719	-0.084602	0.125799	0.18244	-0.0112553	-0.2602	-0.173145	0.152105	0.282149	0.0407842	-0.384526
Rps17_33157.879	-0.0303511	0.00629619	0.00539254	-0.0319386	0.0941399	-0.053918	0.0471434	0.00898171	0.047631	-0.0706405	-0.0668878	-0.0312038	-0.142976	-0.0725932	0.205454	0.221569	-0.0860071	-0.0291607	-0.0563555	-0.0189703	0.0406477	-0.0677139	-0.00584137	0.0289264	0.00332732	0.0150597	0.00524731	-0.0144785	-0.0148616	0.00779189	0.0217091	0.00410707	-0.0230978	-0.0187057	0.015318	0.0305314	0.000719712	-0.0358291	-0.0223361	0.0274606	0.0418273	-0.00662134	-0.0542574	-0.0246337	0.0463448	0.0556529	-0.0206246	-0.080412
Pik3ca_1017.046	-0.0532289	-0.00396347	-0.163135	0.143646	0.0901989	-0.105135	0.0632869	-0.0296366	-0.104932	0.118505	0.0694471	0.0161736	0.187891	0.0924995	-0.657991	-0.429684	0.0308196	0.0184674	0.329594	0.148853	0.115825	0.0895435	-0.0669182	-0.212942	0.000963102	0.00386454	0.00122789	-0.00350915	-0.00341275	0.00181968	0.00479072	0.000838795	-0.0047575	-0.0037218	0.00299633	0.00581868	0.000159206	-0.0062917	-0.00388026	0.0045693	0.00691628	-0.00091469	-0.00813867	-0.00379012	0.00662273	0.00802752	-0.00251092	-0.0103132
Lipa_373.258	-0.0298366	0.189431	-0.250326	-0.00618892	-0.247569	-0.170244	0.156605	0.0069786	0.180689	-0.26509	0.0403133	0.195191	-0.00134802	-0.152922	-0.348908	0.0873703	0.0943018	-0.24023	0.620025	-1.18484	0.493075	0.195204	-0.0945042	-0.107073	-0.00101595	0.0180506	0.0114358	-0.014755	-0.0218794	0.00480666	0.0277895	0.0102529	-0.0271516	-0.0275106	0.0158415	0.0402496	0.00454954	-0.0457465	-0.0311752	0.0346242	0.0547867	-0.00925289	-0.0721394	-0.0294272	0.064122	0.0694488	-0.0366143	-0.107387
Pcnx_149.114	0.113226	-0.185927	0.0553061	-0.154197	-0.0317718	0.156936	0.116835	0.0112877	-0.0352424	-0.145259	0.0219622	0.20454	-0.102705	-0.196729	-0.167937	0.200524	-0.192987	0.118012	0.207979	0.0526832	-0.085916	-0.0510538	-0.173142	0.109446	0.0691767	0.0435096	-0.0377654	-0.0679063	-0.00907871	0.0552973	0.0452788	-0.0226088	-0.0593844	-0.0176965	0.0423948	0.0444599	-0.010479	-0.0502763	-0.023222	0.0308225	0.0417723	-0.00111885	-0.041189	-0.0261864	0.0207857	0.0378288	0.00578474	-0.0325604
Exosc10_434.542	-0.0586035	-0.0311876	0.0655822	-0.0562228	0.0500169	0.0745755	0.0020991	0.0672933	0.000371543	-0.0633888	0.0206435	-0.0144636	-0.0587397	-0.0184956	-0.233029	-0.0783198	-0.0461411	0.305216	0.0584049	0.0245251	0.022532	0.00168133	-0.0593903	-0.0452343	0.00480321	0.00197388	-0.00381202	-0.00505294	0.000388113	0.00583314	0.00397337	-0.00343859	-0.00698568	-0.00147352	0.00654586	0.00655197	-0.00227325	-0.00896866	-0.00424583	0.00663051	0.00964426	-2.0861e-05	-0.0107069	-0.00804078	0.00568635	0.0130621	0.00361515	-0.0117626
Sec22b_1778.538	0.0128978	-0.0496846	0.0949895	-0.0539998	-0.0659301	-0.0856684	0.108641	0.0751918	0.0984585	-0.195449	0.00655312	0.0397674	0.0116608	-0.0804996	-0.0905561	0.244395	-0.0962606	-0.0229922	-0.0210118	0.00390727	0.0167496	-0.0282634	0.0378396	-0.0241788	-0.00521232	0.0777364	0.0467744	-0.0568767	-0.0798577	0.015315	0.0843535	0.0300567	-0.0738049	-0.0705502	0.0360127	0.0864255	0.0101503	-0.0874574	-0.0563164	0.0556689	0.0835367	-0.0120462	-0.0966611	-0.0378156	0.0730996	0.0754934	-0.0353932	-0.100454
Ptprs_72.361	0.107279	-0.0358975	-0.0167186	-0.338005	0.0227319	-0.127955	0.0972936	0.194745	-0.129304	-0.294914	0.15835	0.131426	0.203483	-0.0928201	-0.701304	0.566851	-0.0030888	-0.00423296	0.0724315	-0.778097	0.166729	0.122583	0.235816	-0.187859	0.031522	0.0619249	0.00451648	-0.0695212	-0.0489529	0.0446425	0.0803113	0.00171874	-0.0942616	-0.0611077	0.0626695	0.103724	-0.00336596	-0.127879	-0.0758639	0.0872306	0.13334	-0.0119321	-0.17379	-0.0935939	0.120385	0.170514	-0.0257335	-0.236999
Ptpmt1_1570.59	-0.180062	0.0959378	0.0453723	0.0797894	0.104359	0.00990547	-0.02653	-0.0672322	0.0143916	-0.162287	-0.0826222	-0.0178684	0.0501569	0.00899887	0.123066	-0.090889	-0.0590213	0.0192436	0.16547	0.12102	-0.169199	-0.073054	-0.00842431	0.0282921	0.0163953	0.0393391	0.00659935	-0.0393781	-0.0311598	0.0227725	0.0464043	0.00410045	-0.0490267	-0.0342441	0.0308426	0.0543816	0.000308615	-0.0606619	-0.0370672	0.0409513	0.0632984	-0.00517465	-0.0746307	-0.039378	0.0534928	0.0731517	-0.0128509	-0.0913291
Pdgfb_137.314	0.0279228	-0.0558263	0.0108779	-0.231489	0.204923	0.00568865	-0.0840344	0.296359	0.00026212	-0.442989	-0.0124573	0.135378	0.0390818	-0.0982999	-0.348487	0.32901	0.164194	-0.0213825	0.103535	-0.213369	-0.00984926	-0.209516	0.129471	0.0110165	0.0152401	0.0798973	0.0312996	-0.0769794	-0.0833788	0.0367321	0.110512	0.0259631	-0.120491	-0.102675	0.0710443	0.148889	0.0105714	-0.184186	-0.120477	0.123071	0.195157	-0.0219711	-0.276827	-0.131612	0.198349	0.248334	-0.083243	-0.411633
Spred2_165.682	0.0422453	0.0721553	-0.169854	0.116072	-0.190365	-0.0523804	-0.0982323	0.0437142	0.0864216	-0.252938	0.180594	0.0303082	0.306229	0.171838	-0.360825	-0.0810098	-0.279307	0.110244	0.327185	-0.510491	0.160453	0.052228	-0.00217386	-0.0216614	0.0125453	0.015595	-0.00369359	-0.0205699	-0.00975862	0.0165914	0.0223217	-0.00370989	-0.0284983	-0.0151055	0.0218056	0.0318021	-0.00315054	-0.0394029	-0.023117	0.0284569	0.0450911	-0.00156317	-0.0543868	-0.0350642	0.036839	0.0636033	0.00176374	-0.0749715
Atxn7_31.445	0.120229	-0.328309	-0.0834482	0.00488847	-0.0223934	0.257008	0.311979	-0.0178322	-0.410599	0.0137173	0.0132926	0.213186	-0.110704	-0.548043	-0.567398	0.532147	0.0970966	0.187858	0.102103	-0.228775	0.0633849	0.0783869	-0.140023	-0.065363	0.130616	0.0492319	-0.10642	-0.132038	0.012033	0.131242	0.0857433	-0.0772932	-0.152964	-0.0299572	0.120926	0.117678	-0.0392145	-0.162019	-0.0747596	0.0992636	0.142252	0.00482441	-0.15701	-0.118654	0.0665575	0.157075	0.0512492	-0.13716
Chst12_270.144	-0.0264781	0.00533405	0.225199	-0.114419	-0.057055	-0.0334519	-0.115887	-0.025873	-0.14717	-0.0653985	0.123404	0.00271245	0.185577	0.0245884	0.0645417	0.209206	-0.000836183	-0.0184888	-0.35282	-0.0851002	-0.0542183	-0.0235456	0.0949203	0.063366	-0.00348499	0.0318143	0.0218494	-0.0247504	-0.0395255	0.00626956	0.0474284	0.019681	-0.0448604	-0.0482659	0.0238384	0.0663355	0.0104471	-0.0738009	-0.0533077	0.0521937	0.0870951	-0.0106601	-0.113197	-0.0496765	0.0942926	0.106548	-0.0506173	-0.163571
Igfbp4_3142.307	-0.0484977	0.178396	-0.249524	-0.104268	-0.0224211	-0.00343822	0.189536	0.0345522	0.094413	-0.411147	0.148075	0.31009	-0.206048	-0.163395	-0.477216	0.331384	-0.0344031	-0.0202566	0.310336	-0.565744	0.361473	0.0393196	-0.0731536	-0.0920586	0.0611508	0.110901	0.00577009	-0.123652	-0.0823975	0.0736273	0.126293	0.0023617	-0.145425	-0.0917019	0.0883225	0.143579	-0.00225615	-0.171079	-0.101815	0.105572	0.162941	-0.00838151	-0.201364	-0.112748	0.12575	0.18457	-0.0163801	-0.237212
Ctsb_350.66	-0.137741	0.0894028	0.0315977	0.180496	-0.0723931	0.0374435	-0.239457	0.0147888	0.0461187	-0.0943561	0.0291026	0.0347453	0.0361252	0.111051	-0.0666286	-0.219982	0.0154038	0.12514	0.136545	-0.0014795	-0.139694	-0.127053	0.134042	-0.0234411	0.00797098	0.00749288	-0.00337569	-0.0103168	-0.00342882	0.00856234	0.00946131	-0.00265645	-0.0119438	-0.00529753	0.00900508	0.0117277	-0.00157192	-0.0136464	-0.00760873	0.00922829	0.0143021	-3.90244e-05	-0.0153795	-0.0104235	0.00914507	0.0171854	0.00203542	-0.0170805
Ndufb6_8442.462	0.0439153	0.0143021	0.0408969	-0.153679	-0.0519464	-0.0350346	0.049506	0.0772988	0.0285174	0.00248115	0.0137437	0.0291817	-0.0549095	-0.049179	-0.0448887	0.108803	-0.0174503	0.069193	-0.0334673	-0.0644313	-0.0199507	-0.0129872	-0.00635203	0.0410874	-0.0152416	0.041647	0.0335196	-0.022275	-0.041888	0.000322407	0.037089	0.0175365	-0.0258558	-0.0285029	0.00971712	0.02992	0.00558593	-0.0249411	-0.0169761	0.0142813	0.0219782	-0.00243645	-0.0213906	-0.0079521	0.0153745	0.0144928	-0.00707157	-0.0166641
Tgfbrap1_112.24	-0.000142053	0.00134005	-0.0628178	-0.0506745	-0.0238611	-0.0108475	0.172041	0.189409	-0.0140003	-0.0527846	-0.125497	-0.102162	-0.00752371	0.0090405	-0.275435	0.00299017	0.155625	0.232792	0.0309766	-0.187305	0.0260833	0.0537626	-0.0138209	-0.0506514	-0.00570522	0.0257009	0.0199856	-0.0176848	-0.0317782	0.00237825	0.0352192	0.0164098	-0.0304696	-0.0346204	0.0145697	0.044567	0.00821734	-0.0458086	-0.0335645	0.0311956	0.0522303	-0.0059999	-0.0627257	-0.0265902	0.0520649	0.0561224	-0.0275777	-0.0793757
Ttll5_49.386	0.0133591	-0.0663624	-0.11519	-0.170799	0.218716	0.235814	0.14179	-0.0274524	-0.235207	-0.199044	-0.201043	-0.161117	-0.00485078	-0.0440643	0.0760978	0.351487	0.179695	0.224988	-0.330086	0.0732925	-0.538942	-0.227862	0.459912	-0.0737624	0.140662	0.13476	-0.0631873	-0.208105	-0.0678432	0.153986	0.171627	-0.0504759	-0.249838	-0.10766	0.16523	0.214295	-0.0300127	-0.296604	-0.160126	0.173048	0.26286	6.96144e-05	-0.347973	-0.228823	0.175698	0.317196	0.0417062	-0.402914
Klf3_575.285	-0.0411598	-0.00561667	0.0751314	-0.114394	0.0517252	0.125117	0.0310077	-0.0818971	-0.0412766	-0.180183	0.0678463	0.0452657	-0.0349396	-0.240635	0.000674552	0.343364	0.00225888	0.129859	0.00131673	-0.146334	-0.0781384	-0.122891	-0.0277119	0.122079	-0.00426122	0.0206902	0.0135489	-0.0113637	-0.0171668	0.00151958	0.0152497	0.00602212	-0.0102677	-0.010095	0.00393617	0.0104565	0.00164781	-0.00821486	-0.00534043	0.00445216	0.0066797	-0.000612196	-0.00603475	-0.00235978	0.00401949	0.00393833	-0.00155816	-0.00412583
Gmcl1_2133.931	0.103636	-0.0218308	0.0142323	-0.0912715	-0.109866	-0.0109332	-0.0149585	-0.0271131	0.0409803	-0.0100083	0.0139476	0.123224	0.0994307	0.0411767	-0.0691372	0.0292122	-0.038373	-0.0636889	0.0372342	-0.129952	-0.0579735	0.0534989	-0.00683691	0.0604023	0.0113796	0.0183118	-0.000479585	-0.0202813	-0.0124497	0.0136608	0.0219721	-0.0005762	-0.024401	-0.0149703	0.0163967	0.0263574	-0.000692283	-0.0293661	-0.0180044	0.0196768	0.0316084	-0.000831759	-0.0353539	-0.0216581	0.0236077	0.0378919	-0.000999346	-0.0425807
Prkag2_94.409	0.0822916	-0.119048	0.0511694	-0.108178	-0.0947041	0.0550286	0.0936849	0.157112	-0.10486	-0.314216	0.0623318	-0.0424503	0.286528	0.0400295	-0.464381	0.118321	0.387885	-0.0856103	-0.231561	0.0681906	-0.0748227	-0.0434797	-0.0496302	0.0769663	0.00432049	0.0430186	0.0203786	-0.0368127	-0.0444111	0.0147353	0.0558038	0.0165134	-0.0542388	-0.0500521	0.0299867	0.0701696	0.00816912	-0.07669	-0.0533019	0.0512644	0.0854675	-0.0066446	-0.104831	-0.0522012	0.0797486	0.100563	-0.0305504	-0.139067
Slc52a3_158.859	-0.503751	0.559052	-0.0102432	-0.0829494	0.0417328	0.309654	-0.155847	0.0354726	-0.544721	-0.0257789	-0.0545589	-0.0243425	0.0693102	-0.0756735	-0.0864595	0.0869836	0.286113	0.0101809	0.0779602	0.0725382	-0.259655	-0.294033	-0.0746976	0.192935	0.11741	0.133793	-0.0413884	-0.197654	-0.0831977	0.143798	0.181965	-0.0367711	-0.264581	-0.130657	0.173891	0.244319	-0.0245911	-0.354636	-0.201439	0.20725	0.323666	-0.000799807	-0.477215	-0.307957	0.242869	0.422756	0.0399759	-0.647296
Dcaf7_336.431	0.0784447	0.0466878	-0.00794669	-0.298536	-0.0293285	0.00237014	0.131997	0.108859	-0.298684	-0.0080089	0.160815	0.0719899	-0.0137108	-0.00406456	-0.277626	0.455158	-0.0947153	-0.0042501	-0.0691709	-0.29346	0.00539621	0.0749214	0.00121658	0.0387916	0.0885406	0.13523	-0.00193235	-0.144117	-0.0833781	0.0803296	0.122288	-0.00213188	-0.129327	-0.0745905	0.0728593	0.110536	-0.00227303	-0.116115	-0.0667488	0.0660662	0.0998733	-0.00236537	-0.104301	-0.059747	0.0598921	0.0902067	-0.00241718	-0.0937272
Aldh2_13830.985	0.00646692	-0.00573905	-0.0100547	-0.00479406	0.0062326	-0.0217564	0.0352039	-0.0319093	-0.00984676	-0.00344459	0.0826587	0.118263	-0.16596	-0.0483924	0.0154919	-0.0193364	0.00905512	0.025483	0.00761018	-0.0706843	0.0702577	0.0172599	0.0143042	-0.0394637	0.014116	0.00894392	-0.00799477	-0.0145789	-0.00208244	0.0130124	0.0111032	-0.00536014	-0.0149397	-0.00496117	0.0113922	0.0128293	-0.00251062	-0.0147083	-0.00765757	0.0093164	0.0140543	0.000440902	-0.0138923	-0.0100632	0.00686384	0.0147296	0.00337786	-0.0125232
Atp6v1c1_1184.244	0.0533035	-0.0126797	0.0313163	-0.079223	-0.112211	-0.0241261	-0.000135189	0.0646858	-0.0221709	0.107618	0.0433584	0.0730932	0.0516594	-0.0379325	-0.245228	-0.111373	0.136372	0.0101918	0.0135345	0.0489736	-0.118097	0.116388	-0.0302991	-0.0161607	0.012795	0.00600694	-0.00937033	-0.0134696	7.81542e-05	0.0143938	0.0106225	-0.00764613	-0.0172249	-0.00453102	0.0149624	0.0159456	-0.00425872	-0.0205354	-0.0106154	0.0139876	0.0216438	0.0010936	-0.0228016	-0.0180933	0.0109134	0.0272022	0.00860005	-0.0232898
Trak1_200.921	0.0386519	0.153767	-0.129018	-0.219463	0.00194538	-0.0306532	-0.0568454	-0.0799868	-0.0880311	-0.110147	0.257644	0.245276	0.086997	0.0696185	-0.63332	0.466528	-0.0133209	-0.263839	0.102229	-0.491475	0.138227	0.202746	-0.0616529	-0.00714527	0.120865	0.0472574	-0.0989124	-0.126385	0.0096522	0.127393	0.0861885	-0.0746252	-0.154463	-0.0334283	0.122621	0.12396	-0.037629	-0.172243	-0.0843016	0.104378	0.156802	0.0102518	-0.175031	-0.139654	0.071009	0.180823	0.0657409	-0.159098
Nfib_58.223	0.000469496	-0.211159	-0.0112231	0.119559	0.0332535	0.110299	0.0776182	-0.165275	-0.0361002	-0.0020985	-0.0876492	0.452005	-0.223522	-0.0719993	-0.585989	0.0174304	0.0333969	-0.147323	0.32891	-0.0192661	0.326728	-0.0947145	0.0431396	-0.237371	0.0160551	0.0161626	-0.00513737	-0.0190579	-0.00721158	0.013553	0.0155654	-0.00308495	-0.0171414	-0.00797314	0.0112654	0.0148241	-0.00134098	-0.0152838	-0.00847543	0.00919193	0.0139755	0.000120722	-0.0135049	-0.00875514	0.00732891	0.0130513	0.00132621	-0.0118193
Slc43a2_66.818	0.36226	-0.119072	-0.064143	-0.483415	-0.514947	0.121895	0.0661338	0.278664	-0.0300376	-0.0454721	0.393189	0.217085	0.064556	-0.0321038	-0.412	-0.394584	-0.0204509	-0.162769	0.0368994	-0.455121	0.620935	0.171159	-0.122311	-0.157143	0.236111	0.227723	-0.0827431	-0.306864	-0.103198	0.179232	0.19682	-0.0433143	-0.238656	-0.102328	0.133267	0.167869	-0.0164217	-0.18468	-0.0968815	0.0967742	0.141429	0.0014337	-0.142014	-0.0887684	0.0683104	0.117789	0.0127812	-0.108373
Cxxc5_1487.831	0.180644	0.0017956	-0.0591666	-0.276733	-0.00936196	-0.173309	0.130777	-0.0912856	0.0298599	0.0369243	0.142263	0.167056	0.0138796	-0.0936586	-0.121657	0.315237	-0.0992542	-0.201843	0.0198703	-0.383646	0.223977	-0.00940141	0.0101867	0.043942	0.0936505	0.0454167	-0.0655954	-0.0952935	-0.0016082	0.0886534	0.0655347	-0.0445	-0.10221	-0.0268655	0.0778811	0.081635	-0.0203812	-0.102355	-0.0512915	0.0618009	0.0927342	0.00513608	-0.0955786	-0.0731723	0.0412001	0.0981282	0.0303824	-0.0822787
Atg4a_449.666	0.0725807	0.0742261	-0.0581322	-0.10421	-0.063091	-0.0646687	0.0191145	-0.0670893	0.057299	-0.13863	0.196006	0.0023033	0.204797	0.0273711	0.0216354	-0.0614456	-0.0315418	-0.143319	-0.0243199	0.00684669	-0.0588393	0.0255753	-0.0465067	0.0899798	0.0627033	0.0278806	-0.052008	-0.0731641	0.0030248	0.0810315	0.0595544	-0.048606	-0.109972	-0.02759	0.0959251	0.103664	-0.0301165	-0.152847	-0.0801123	0.101019	0.159944	0.0114845	-0.195926	-0.163183	0.0864935	0.225366	0.0842556	-0.227112
Fgf1_411.193	0.109084	0.137276	-0.211305	0.021507	-0.18129	0.0408876	-0.0717287	-0.275614	0.00942692	-0.220396	0.131572	0.326324	0.182792	0.0787896	0.0121615	0.0652472	0.272353	-0.314512	-0.111301	-0.323001	-0.213456	-0.0127012	0.109073	0.170152	0.0633975	0.0273614	-0.0472966	-0.0639813	0.0020539	0.0645314	0.0455496	-0.0344814	-0.0745647	-0.0182934	0.0602771	0.0624949	-0.0166912	-0.080169	-0.0406501	0.0500855	0.0766051	0.00516507	-0.0794238	-0.0633697	0.0337699	0.0863074	0.0297026	-0.0713808
Prpsap1_1530.951	-0.0276722	0.0119156	0.0941789	0.0388735	-0.144924	-0.0250911	0.00855752	0.00101877	0.00495532	-0.0312888	-0.0156412	-0.0692832	0.0225117	0.0470396	0.0760548	0.211602	-0.112392	-0.0566884	-0.0472074	0.0520949	-0.102899	-0.0444909	-0.0610451	0.119483	0.0159295	0.0226638	-0.00326376	-0.0297134	-0.0165388	0.0234109	0.0354192	-0.00328775	-0.0456124	-0.0273763	0.0342324	0.0551092	-0.00237267	-0.0700987	-0.045157	0.0497601	0.0852651	0.000498592	-0.108025	-0.074391	0.071822	0.130953	0.00714846	-0.167361
Ostm1_729.831	0.0443345	0.00167047	0.135607	-0.269825	-0.0545173	0.00186801	0.0947229	0.0268098	-0.0992497	-0.0106626	0.0027516	0.0210859	0.106919	0.0547673	-0.167346	0.159805	0.0271529	0.00239143	-0.218468	0.147345	-0.103393	-0.117635	0.0292365	0.0869657	0.0112176	0.147631	0.0666702	-0.0975144	-0.107246	0.0260522	0.0952204	0.0271355	-0.0692297	-0.0574547	0.0274446	0.0590895	0.00719254	-0.0469509	-0.0292876	0.0234821	0.0353054	-0.00171831	-0.0306848	-0.0137907	0.0181036	0.020273	-0.00486431	-0.0194056
Terf1_665.641	0.239173	-0.0419197	-0.0587179	-0.366934	-0.0628336	-0.239413	0.0856557	0.216017	0.194687	-0.210241	-0.00982388	0.0134159	0.336882	0.229385	-0.361011	-0.428729	0.351223	-0.00274376	-0.229481	-0.0707717	-0.0681954	0.125859	-0.0614335	0.0498873	-0.0201129	0.0997247	0.0692262	-0.0627646	-0.10123	0.00846082	0.093241	0.0400609	-0.0719448	-0.0756105	0.0286099	0.0815836	0.0150773	-0.0731979	-0.0511869	0.0412193	0.0668743	-0.00482932	-0.0684745	-0.0295115	0.0474294	0.0509269	-0.0193634	-0.0597287
Cds2_655.509	0.0891013	0.0328714	-0.0643676	-0.121061	-0.132628	0.035626	0.106104	-0.043992	-0.0795417	-0.163556	0.17821	0.160434	0.00643825	0.0251822	-0.184453	0.345133	-0.121985	-0.129313	0.0474081	-0.372661	0.0933179	0.117091	-0.0199789	0.0239443	0.0969184	0.143433	-0.00304151	-0.149561	-0.0845766	0.0806991	0.120834	-0.00180989	-0.123434	-0.070781	0.0671254	0.101667	-0.000903716	-0.10203	-0.0592762	0.0557859	0.0854488	-0.000248659	-0.0844429	-0.049669	0.0463272	0.0717509	0.000213796	-0.0699588
Mlec_1452.868	0.189506	-0.0985103	0.0179937	-0.336327	-0.073381	-0.172446	0.196863	0.223534	0.0762502	-0.248143	0.00508738	0.169672	0.11207	0.0137869	-0.512701	0.397007	-0.2325	0.0910873	-0.0782748	-0.312437	0.196403	0.0497865	0.0603598	-0.0825938	-0.0152252	0.0961226	0.0663317	-0.0666469	-0.107248	0.0115359	0.10705	0.0461723	-0.0909173	-0.0974164	0.0392275	0.112222	0.0210792	-0.111549	-0.0804669	0.066181	0.110902	-0.00794272	-0.126699	-0.0571281	0.0907319	0.102622	-0.0395016	-0.134733
Kdm5c_159.401	0.0547859	-0.0778142	-0.0218402	-0.129613	-0.0181029	-0.0429489	0.150279	-0.0231281	0.0177104	-0.0639289	0.338238	0.119214	-0.203421	-0.158398	-0.398074	0.111401	-0.0846553	-0.108612	0.164348	-0.296036	0.49306	0.118467	0.025642	-0.280899	0.053391	0.0554685	-0.0200726	-0.0763152	-0.0294978	0.0587693	0.0704674	-0.0153537	-0.0907899	-0.0441781	0.0634974	0.0881993	-0.00783644	-0.106908	-0.0631311	0.0670687	0.108901	0.00325944	-0.124538	-0.087344	0.0688169	0.132758	0.0188354	-0.143395
Rab3d_931.274	0.0316214	0.0556893	0.0825822	-0.239895	-0.00683091	0.0129998	-0.0469265	-0.0931056	-0.0639368	0.0214825	0.0700486	0.0370287	0.0276651	-0.0655578	-0.000886397	0.499563	-0.0274726	-0.159909	-0.16187	-0.268872	-0.0342522	0.012422	0.0665975	0.0771693	0.029323	0.0250492	-0.00959899	-0.0273923	-0.00850278	0.0175976	0.0178307	-0.00399278	-0.0176633	-0.00736075	0.0102865	0.0124295	-0.00109225	-0.0112327	-0.00591344	0.00582283	0.00850696	0.000283199	-0.00703707	-0.00452576	0.00315946	0.00572625	0.0008315	-0.00433628
Nck2_440.576	0.193232	0.00608966	-0.0303363	-0.363609	-0.0925482	-0.10637	0.137837	0.0817117	0.0904256	-0.191162	0.128523	0.130507	0.136082	-0.114174	-0.299433	0.352912	0.0576492	-0.0935554	-0.100311	-0.273981	-0.0629876	0.147937	-0.0450725	0.0805241	0.0576633	0.149165	0.0339768	-0.133672	-0.108938	0.0586526	0.126681	0.0191962	-0.117736	-0.0849534	0.0577757	0.106822	0.00789425	-0.102971	-0.0654842	0.0555729	0.089426	-0.000543018	-0.0894699	-0.0497491	0.0524686	0.0743068	-0.00665248	-0.0772617
Fam110c_216.632	-0.0443472	0.21898	-0.136637	-0.0110648	0.120644	-0.185555	-0.0350013	-0.187143	-0.0915701	-0.212401	0.0954555	0.340057	0.206972	-0.0278517	0.0653023	0.157228	-0.0617766	-0.177624	-0.108012	-0.180007	-0.050867	-0.0211884	0.0368441	0.11318	-8.32822e-05	0.0482767	0.0263776	-0.0345977	-0.04553	0.00956668	0.0487036	0.0171765	-0.040228	-0.0390663	0.0183032	0.0473084	0.00775032	-0.0440505	-0.0314822	0.0258606	0.0442329	-0.0015388	-0.0460014	-0.0231369	0.0320331	0.0396692	-0.0103458	-0.0460967
Mras_61.359	-0.0353043	-0.201776	-0.181309	0.153642	0.0231892	-0.0430381	0.336838	0.0688477	0.0736303	-0.110494	-0.166451	0.0137709	-0.0173596	0.0105116	-0.975772	-0.269478	-0.0971941	0.631725	0.122892	-0.0700905	0.0442864	0.432105	0.0994727	-0.574474	0.00824071	0.0287352	0.00858132	-0.0294771	-0.0291438	0.0163824	0.044254	0.00890595	-0.048792	-0.0418077	0.0307275	0.0673784	0.0068069	-0.0802112	-0.0590043	0.055291	0.101277	-0.000518608	-0.131419	-0.0816064	0.0962068	0.149998	-0.0182894	-0.215671
Kcmf1_254.113	0.035298	0.017427	-0.164098	-0.0675506	-0.0209717	0.00587768	0.14673	0.182244	0.104866	-0.138715	0.121775	-0.152755	-0.0251209	-0.193384	-0.263404	-0.0779036	0.105639	0.317454	0.00475272	-0.116524	0.116743	0.0370308	-0.0137903	-0.108997	0.0090858	0.0241107	0.00503077	-0.0245785	-0.0212735	0.0142012	0.0325848	0.00465068	-0.0348233	-0.0272859	0.0217439	0.0438121	0.00328629	-0.0491657	-0.0346993	0.0327366	0.0585835	0.000268831	-0.0692284	-0.043689	0.0485778	0.0778656	-0.0054291	-0.0973107
Nt5c2_259.789	0.00233356	-0.00528387	0.218632	-0.407892	0.0624451	0.193365	-0.081775	-0.0965155	-0.107368	0.0643232	0.0676835	0.0649891	-0.000120618	-0.00928529	-0.260489	0.204293	0.0709197	0.0604142	0.00137424	-0.0802309	-0.207842	-0.00207182	0.0217472	0.0687833	0.163167	0.0940684	-0.0970723	-0.162288	-0.017299	0.124731	0.100587	-0.0507637	-0.136377	-0.0426742	0.0890326	0.0977239	-0.0165047	-0.108601	-0.0568143	0.0578133	0.0886997	0.00742349	-0.0818276	-0.0621016	0.0320151	0.0760988	0.0228308	-0.0578064
Osgepl1_388.04	0.0261835	-0.0704732	0.245989	-0.295235	-0.0228549	-0.0505095	0.0215917	0.0384589	0.0680503	-0.0735633	0.108758	-0.0768408	0.230159	-0.0860316	-0.266029	-0.0751472	0.135613	0.105604	-0.100434	0.0616331	-0.260086	0.213536	0.00946525	-0.0535719	0.00463358	0.0294413	0.0127121	-0.0272304	-0.0317827	0.0122649	0.043633	0.0126399	-0.0447292	-0.0424087	0.0257126	0.0633364	0.00923908	-0.0718113	-0.0547208	0.0482638	0.0899604	-0.000614433	-0.113269	-0.0674785	0.0845475	0.124811	-0.0222513	-0.176328
Capn5_635.729	-0.048973	0.126099	0.00538527	-0.144306	-0.0244619	0.0523563	-0.010148	-0.1897	-0.0628959	-0.0667686	0.176697	0.281287	0.0150042	-0.0631986	-0.332198	0.154546	0.0295273	-0.0472654	0.159702	-0.549347	0.267496	0.0520789	0.0166159	-0.0439555	0.0988678	0.0396137	-0.080372	-0.105228	0.00634081	0.108173	0.0758989	-0.0615983	-0.134076	-0.0329722	0.10704	0.11369	-0.0288762	-0.154931	-0.0827535	0.0920564	0.148916	0.017398	-0.16179	-0.14053	0.0599986	0.176785	0.0748547	-0.148814
Tab3_432.848	-0.039515	-0.139552	0.0831495	0.167832	-0.0288985	0.0905742	-0.0767055	0.0851195	-0.158917	0.0764078	-0.114742	-0.0963912	0.0546509	-0.0511973	-0.0916544	-0.0738822	0.15261	0.21668	0.0720173	-0.0477547	-0.109958	-0.08016	-0.032634	0.0549572	0.00383205	0.00243458	-0.00239205	-0.00441423	-0.000632319	0.00432899	0.00386518	-0.0018817	-0.00560559	-0.00205991	0.00457427	0.00559319	-0.000876251	-0.00676117	-0.0040023	0.00440517	0.00757035	0.000766263	-0.00772338	-0.00650257	0.00362152	0.0096936	0.00318634	-0.00827377
Pcbp3_30.748	-0.0873665	-0.0070907	0.0589731	-0.223536	0.135809	0.141462	0.145969	0.121049	0.00802363	-0.340107	0.0337946	-0.0165323	-0.0499913	-0.110803	-0.152123	-0.130834	0.0906582	0.275299	-0.123148	-0.00182005	0.208184	0.114322	-0.166144	-0.095893	0.134674	0.0737156	-0.0866664	-0.138979	-0.0112482	0.116088	0.0926448	-0.0512473	-0.134361	-0.0416654	0.0928057	0.103354	-0.0180982	-0.121724	-0.0658873	0.0666853	0.106434	0.0111193	-0.103101	-0.0829854	0.0395721	0.102757	0.0352886	-0.0806452
Stk38l_221.49	-0.112525	0.0952825	-0.00580889	0.140226	-0.109338	0.0156392	0.0581871	-0.0769786	-0.0278844	-0.272785	0.14766	0.149994	-0.0335663	-0.0541477	-0.0394613	0.0865656	0.00260332	-0.02804	0.125688	-0.240471	0.130918	-0.0286668	-0.0674888	0.0440207	0.0159179	0.0407615	0.00859812	-0.0361323	-0.0298815	0.0176242	0.0391033	0.00590253	-0.0360484	-0.027107	0.0191304	0.0373676	0.00335388	-0.035794	-0.0243906	0.0204429	0.0355677	0.000955127	-0.0353817	-0.0217418	0.0215688	0.0337161	-0.00129169	-0.0348242
Mrpl51_74.662	-0.05672	0.171968	-0.0342224	-0.167986	-0.0357616	-0.0351634	0.197087	-0.0968258	-0.0442954	-0.00409222	0.133636	-0.0315202	0.183797	-0.0712812	-0.12945	-0.116546	-0.0136201	-0.0116651	-0.0875038	0.10826	-0.0112828	0.207761	-0.0756015	-0.0768588	0.0559761	0.105904	0.0113231	-0.0998538	-0.0693556	0.0497015	0.0905844	0.0077634	-0.0856893	-0.0576328	0.044047	0.0773871	0.0049909	-0.073547	-0.0478738	0.0389671	0.0660387	0.00285512	-0.0631307	-0.0397461	0.0344165	0.0562963	0.00123166	-0.0541902
Eid1_2501.82	0.170419	-0.0938452	0.0770476	-0.202861	-0.117482	-0.130642	0.112615	-0.100982	0.0934506	0.00516627	0.0787526	0.142956	0.269772	-0.0139437	-0.195957	-0.137015	-0.0396113	-0.0407229	-0.0240271	-0.171795	0.043288	0.178064	0.0260447	-0.0595074	0.0228578	0.045299	0.00460707	-0.0462845	-0.0338274	0.0267284	0.0512024	0.0042922	-0.053141	-0.0377467	0.0312125	0.0578417	0.00380288	-0.0610129	-0.0420957	0.0364012	0.0653023	0.00309719	-0.0700548	-0.0469181	0.0423977	0.0736776	0.00212491	-0.0804461
Ptp4a2_5400.743	-0.140918	0.163683	-0.164212	0.0262139	0.2722	-0.175588	0.17611	-0.115007	0.112503	-0.219299	-0.028668	-0.036091	-0.179637	-0.00791239	0.22967	0.0163768	0.00242631	-0.138767	-0.00620399	0.17064	0.027211	-0.0616614	-0.0994878	0.0242411	0.0011983	0.0194296	0.0103067	-0.0166693	-0.0221626	0.00608938	0.0289831	0.0104259	-0.0280875	-0.0291733	0.0149841	0.0420556	0.00804744	-0.0455688	-0.0367848	0.0301267	0.059333	0.000896438	-0.0717586	-0.0437133	0.0546381	0.0812361	-0.0147749	-0.110254
Zdhhc6_1815.314	-0.0376639	-0.00700349	-0.00648919	-0.0664835	0.108409	-0.0340873	0.0686668	0.0674634	0.0116907	-0.117733	0.0536929	-0.0360649	0.0729361	0.0888061	-0.413546	-0.131103	0.103224	0.0460776	0.0837039	0.0449655	0.0451826	0.110603	-0.0184871	-0.136388	-0.000228297	0.0037385	0.00234453	-0.00271249	-0.00405071	0.000644844	0.00470566	0.00195011	-0.00398058	-0.00433665	0.00184476	0.00568285	0.00120943	-0.00545653	-0.00436473	0.00340873	0.00658845	3.48606e-05	-0.00710148	-0.00401885	0.0053582	0.00731139	-0.00166188	-0.00884426
Pi4k2a_211.747	-0.0143323	-0.0446311	0.115174	-0.316277	0.109134	0.0589225	0.0917509	0.209299	-0.124539	-0.25843	0.128205	0.0362153	0.0459115	-0.171461	-0.381231	0.211386	0.084062	0.0586512	0.0287739	-0.301573	0.25121	0.103727	-0.0274601	-0.127148	0.01695	0.0789097	0.0297519	-0.070778	-0.0753456	0.0300041	0.0936975	0.0249712	-0.0916632	-0.0822553	0.0468238	0.109832	0.0168835	-0.116881	-0.0877532	0.0680338	0.127072	0.00446001	-0.147051	-0.090933	0.0942637	0.14504	-0.0135867	-0.182815
Dkc1_1488.859	-0.228448	0.0816216	-0.0979312	-0.00615851	0.171057	0.0215593	0.246955	0.136018	0.0728389	-0.31678	-0.0723748	-0.40883	0.0505157	0.0522826	-0.0800693	-0.720248	0.0942443	0.444432	0.224311	0.264831	-0.111813	-0.0222511	-0.0664155	-0.17788	0.00648413	0.0057903	-0.00303193	-0.0085733	-0.00275142	0.00744054	0.00831492	-0.00228313	-0.0108513	-0.00519241	0.00819615	0.0115154	-0.000824299	-0.0133852	-0.00860286	0.00854577	0.0154678	0.00162783	-0.0160611	-0.0132255	0.00819963	0.020215	0.00542378	-0.0186783
Slc19a2_358.369	0.175967	-0.161746	-0.076368	-0.21957	0.086109	-0.0570425	0.181607	0.166784	-0.0223907	-0.0214531	-0.0176753	0.0165157	0.0551026	-0.024284	-0.542383	0.142789	-0.117975	0.242695	0.0561112	0.0156091	0.0282453	-0.0167571	-0.0469117	-0.034903	0.0945012	0.0394549	-0.0786488	-0.106733	0.00491853	0.112366	0.0821549	-0.0647839	-0.149122	-0.0399831	0.120196	0.133457	-0.0304393	-0.188669	-0.106898	0.110692	0.188874	0.0286124	-0.214747	-0.198386	0.0746398	0.241312	0.113428	-0.212782
Vbp1_5894.167	0.0807913	0.0500327	-0.0416653	-0.0645236	-0.0556235	-0.133191	-0.0566193	0.0207914	0.0839542	-0.128061	0.0972103	-0.0295441	0.236696	0.160909	-0.0107864	-0.0676568	0.0049987	-0.101934	-0.174909	0.013052	-0.132454	0.0819011	0.0531703	0.0334667	0.00282263	0.00809492	0.00196474	-0.00763358	-0.00688383	0.00401542	0.00993637	0.00181445	-0.00975636	-0.00803628	0.0055945	0.0121509	0.00147637	-0.0124155	-0.00931421	0.00766784	0.0148019	0.000871732	-0.0157356	-0.010707	0.0103701	0.0179596	-0.000103979	-0.0198681
Cd44_13374.58	0.0498349	0.011606	0.00593056	-0.063659	-0.021413	-0.0811825	-0.0135652	0.00771639	-0.0529959	0.0617687	0.0494796	0.114845	-0.0784944	0.0500172	-0.0657854	0.0680604	0.0966347	-0.134583	0.0510714	-0.178213	0.0851139	-0.0648216	-0.0341466	0.0899085	0.0150482	0.00644337	-0.0107612	-0.0146325	0.000206341	0.0149957	0.0109106	-0.00735719	-0.0167565	-0.0048246	0.0134445	0.014863	-0.00278225	-0.0174758	-0.0100504	0.0103485	0.0178456	0.00265139	-0.0165326	-0.0149712	0.00580582	0.0194415	0.00850798	-0.0138069
Suv39h1_512.527	0.131687	-0.117033	0.0685361	-0.217141	-0.0115585	-0.0361382	-0.160914	0.299466	0.105556	-0.191352	-0.114947	-0.30879	0.161151	0.153312	0.206411	0.25715	-0.0312031	-0.0262127	-0.632378	0.0564657	-0.0795417	0.0550649	0.160129	-0.0423681	0.0494576	0.0983048	0.0132364	-0.0878793	-0.0632165	0.041296	0.0787754	0.00886621	-0.0705349	-0.0490811	0.0343943	0.0630098	0.00570735	-0.0566471	-0.0381059	0.0285801	0.0503191	0.00345386	-0.0455102	-0.0295757	0.0236986	0.0401283	0.00187208	-0.0365697
Arl6ip6_1720	-0.00286359	0.0666619	-0.122866	-0.105129	-0.0384754	-0.0372281	0.179358	0.228148	-0.0057338	-0.0261024	-0.0482014	-0.248676	0.162102	0.06775	-0.374986	-0.091789	0.0184853	0.202478	-0.0846498	0.167467	-0.155069	0.198943	0.0512572	-0.1852	0.0311707	0.03329	-0.0113432	-0.0459026	-0.0192493	0.0361597	0.0460508	-0.00778985	-0.0583915	-0.031808	0.0407305	0.0623671	-0.0011057	-0.0731329	-0.0495345	0.0441523	0.0828496	0.0100375	-0.0900789	-0.0741475	0.0453319	0.108073	0.0273295	-0.108895
Tmem80_128.052	0.0345527	-0.0367107	0.219245	-0.242787	-0.288629	-0.0478037	0.261437	0.11215	0.0177668	-0.0548003	-0.227822	0.217174	0.00948199	-0.431722	0.234757	0.0298726	0.0737842	0.155231	0.0314491	-0.208308	-0.197209	0.021675	-0.0387444	0.103553	-0.050742	0.151464	0.118392	-0.0847258	-0.159626	-0.000745628	0.129083	0.0657009	-0.0906543	-0.107439	0.0274391	0.102682	0.0273687	-0.0841488	-0.0665559	0.040609	0.0765148	0.00182353	-0.0712414	-0.0363478	0.0439183	0.0531489	-0.0133356	-0.0561313
Trim23_908.463	0.00967758	0.0374085	-0.018208	-0.0761528	-0.0748942	-0.092295	0.0731	0.0444124	0.123203	-0.0686103	0.103182	0.0495926	0.0764082	0.0439375	-0.403998	-0.335903	0.219907	0.0873885	0.0431618	0.0471226	-0.0321335	0.0838902	0.0365884	-0.118896	0.00536426	0.0209682	0.00703995	-0.0189926	-0.0194592	0.00883664	0.0264246	0.00661276	-0.0254468	-0.0229383	0.0136757	0.0330447	0.00540784	-0.0337811	-0.0266831	0.0203064	0.0409977	0.00305252	-0.044479	-0.0305531	0.0292589	0.0504488	-0.000961896	-0.0581359
Xpr1_148.411	0.123763	0.229451	0.019614	-0.973599	-0.177055	0.350858	0.152365	0.0471695	-0.203132	0.0681467	0.220338	0.130825	0.102353	-0.0390042	-0.740699	0.350737	-0.125837	-0.0747792	-0.082354	0.091317	-0.0338996	0.0188061	-0.156831	0.0710615	0.309552	0.310143	-0.0923236	-0.415578	-0.153685	0.21168	0.247992	-0.0332335	-0.285825	-0.138847	0.139524	0.194326	0.000155083	-0.196294	-0.119145	0.0880827	0.149456	0.0177226	-0.133933	-0.0986405	0.0525927	0.112957	0.025617	-0.0904042
Ripk2_274.422	0.160023	-0.0344258	0.0706823	-0.275358	-0.143982	-0.183392	0.211342	-0.0411998	0.143058	-0.0342666	0.079883	0.145624	-0.0948429	-0.0746118	-0.107021	0.15605	0.243783	-0.163529	-0.106114	-0.123253	-0.174976	0.106497	-0.0014337	0.0791602	0.0286666	0.0679272	0.01309	-0.0625235	-0.0508312	0.0303768	0.0665744	0.0105222	-0.0626822	-0.0482635	0.031988	0.0651671	0.00801454	-0.0627421	-0.0457083	0.033501	0.0637088	0.00556901	-0.0627062	-0.0431689	0.0349169	0.0622031	0.00318742	-0.0625776
0_316.143	-0.0774219	-0.0279243	0.0569787	-0.00482558	0.0399593	0.143061	0.0423175	-0.0178047	-0.284794	0.124244	-0.0972886	0.0286425	-0.139221	-0.0436589	-0.143687	0.378057	-0.00437043	0.0208264	-0.0435782	0.0747693	-0.214261	0.0108623	0.0866303	-0.0444962	0.0427725	0.0282055	-0.0244235	-0.0473069	-0.00841015	0.041191	0.0379543	-0.0155037	-0.0513998	-0.0203854	0.0368992	0.0467145	-0.00445659	-0.0528754	-0.0328931	0.0297555	0.053844	0.00830481	-0.0512682	-0.0452329	0.0197574	0.0587134	0.0222149	-0.0462564
Ube2b_9891.38	0.0321525	0.018501	-0.0200082	-0.0962173	0.0073171	-0.0436809	0.0166303	0.0786287	0.0595333	-0.109234	0.0674836	-0.0362004	0.11392	0.0609914	-0.154952	-0.116056	0.0703154	-0.0106633	-0.0302142	0.0414487	-0.0182827	0.0485717	0.0382645	-0.0560153	0.00441368	0.0103906	0.00184867	-0.00981121	-0.00803876	0.00525387	0.0116253	0.00173873	-0.0111933	-0.00878062	0.00622937	0.0129952	0.00157144	-0.0127583	-0.00957484	0.00735981	0.0145136	0.00133439	-0.0145289	-0.0104223	0.00866738	0.0161949	0.00101303	-0.0165308
Mex3d_2021.789	0.129812	-0.0579867	-0.0028513	-0.172875	-0.0190193	-0.103239	-0.0948461	0.214195	-0.0002456	-0.173767	0.113203	0.167444	0.245595	0.143185	-0.526501	-0.0654371	0.0482785	-0.0919691	0.00453446	-0.139509	0.201971	0.00696135	0.0287689	-0.0641387	-0.00728552	0.0362085	0.0271182	-0.0233774	-0.041513	0.00188791	0.0427943	0.0213882	-0.0337494	-0.0409608	0.0126631	0.0479345	0.0131337	-0.0440418	-0.0376348	0.0246426	0.0510387	0.00235252	-0.0535535	-0.0312256	0.0372854	0.0515252	-0.010801	-0.0614833
Arf2_325.322	-0.00105261	-0.0341626	0.0941965	-0.276132	0.076156	0.17736	0.0377191	0.119539	-0.0684813	-0.202092	0.0324038	-0.0859012	0.0306079	-0.0684689	-0.112734	0.17457	-0.0279317	0.182158	0.0452765	-0.152513	-0.0975954	0.028325	0.0432633	-0.022184	0.0906394	0.122244	-0.0102056	-0.136557	-0.0743904	0.0784899	0.11656	-0.00156569	-0.124041	-0.075575	0.067258	0.110665	0.0058615	-0.112217	-0.0759266	0.0569233	0.104635	0.0121892	-0.101089	-0.0755558	0.0474602	0.0985348	0.0175223	-0.0906567
Bbs4_219.694	0.0907374	0.00337151	-0.136558	-0.253629	0.126401	-0.125202	0.126532	0.149777	0.0739674	-0.213305	0.183675	-0.0886361	0.264271	0.0286927	-0.450036	-0.453221	0.191341	0.0682767	0.0244765	0.179456	-0.0465817	0.214127	-0.207318	-0.0504474	0.0310843	0.0199768	-0.0177913	-0.0335443	-0.00566544	0.0294833	0.026803	-0.0110991	-0.0359449	-0.0141575	0.0259165	0.0326866	-0.00305843	-0.0363652	-0.0227222	0.0203819	0.0371841	0.00596288	-0.0345695	-0.0308321	0.0129917	0.0398902	0.0155048	-0.0304436
Btbd19_81.557	-0.357061	0.29359	-0.13339	-0.226925	0.370053	0.0723902	0.244877	0.231271	-0.0273598	-0.469844	-0.185913	-0.220036	-0.125261	-0.228465	-0.322857	0.128162	0.474392	0.37907	-0.120641	-0.19541	0.104458	0.0460928	-0.194613	-0.0638004	-0.013837	0.0216908	0.0258791	-0.0102858	-0.0339073	-0.00611704	0.0327532	0.0234101	-0.0239326	-0.0382152	0.00631811	0.043395	0.0156659	-0.0401381	-0.037844	0.0234746	0.0516221	0.00135702	-0.0572919	-0.0306095	0.0445407	0.0549199	-0.020367	-0.0727479
Abcb10_444.564	-0.00291287	-0.0348717	0.126343	-0.147129	0.045148	0.0639272	0.0117738	-0.0821817	-0.0904784	-0.0713499	0.108187	-0.00978773	-0.0223195	-0.00251146	-0.0416528	0.302078	-0.0306127	-0.0555569	-0.055101	-0.0640096	-0.107625	0.0680587	-0.0568324	0.0756316	0.0412658	0.0504484	-0.00765109	-0.055593	-0.0277844	0.0347114	0.0482785	-0.00256206	-0.0499745	-0.0292511	0.0286865	0.04581	0.00176333	-0.0445666	-0.0301013	0.0231917	0.0431197	0.00538933	-0.0394093	-0.0304177	0.0182207	0.0402757	0.00837881	-0.0345326
Mprip_3994.415	0.115175	-0.0871225	0.0919777	-0.113241	-0.0876828	-0.0435477	-0.037446	0.0727511	-0.0542804	0.0696415	-0.0336835	0.066604	0.0581496	-0.0310741	-0.0276591	0.140137	0.0560049	0.0319168	-0.112267	-0.120093	-0.0878447	-0.0887046	0.0703942	0.0972105	-0.00563427	0.0225607	0.018609	-0.0146175	-0.0288373	0.000140265	0.0310067	0.0170741	-0.0250412	-0.0329063	0.00916765	0.0401473	0.0123848	-0.0382051	-0.034885	0.0220613	0.049186	0.00331604	-0.0539506	-0.033295	0.0392508	0.0569046	-0.0115263	-0.0716566
Tor3a_763.912	-0.00289873	0.127153	-0.092945	-0.237978	0.0808865	-0.0134572	0.126359	0.055846	0.0499952	-0.147758	0.0712136	0.0825892	-0.0551998	-0.173719	-0.188646	0.0882613	0.235994	-0.0396622	0.0548841	-0.104933	-0.059752	0.041454	0.0294221	-0.029775	0.0447781	0.0647255	-0.00362432	-0.0720384	-0.0425949	0.0441215	0.0704415	0.000969123	-0.0753658	-0.0495783	0.043002	0.0763236	0.00616385	-0.078492	-0.0571217	0.0413649	0.0823454	0.0119928	-0.0813601	-0.0652409	0.0391519	0.0884758	0.0184873	-0.0839076
Esrra_885.107	0.0281655	0.0118941	0.0688819	-0.0246693	-0.0633874	-0.0570394	-0.184139	0.00412671	0.10468	-0.0857098	0.0234744	-0.0521215	0.00765998	0.0527838	0.0768728	0.330939	0.141712	-0.15385	-0.175965	-0.184928	-0.0735795	-0.120464	-0.000637475	0.199708	0.0420224	0.0877119	0.0104891	-0.104444	-0.0833325	0.0638021	0.134442	0.0177307	-0.165105	-0.133177	0.0964647	0.204346	0.0297169	-0.264345	-0.215097	0.144977	0.306898	0.0493814	-0.432819	-0.353901	0.216045	0.453376	0.0812928	-0.73986
0_25.53	-0.0056614	0.0858534	-0.110649	-0.154902	0.000422587	0.238632	0.0267996	-0.0575389	0.0791913	-0.288018	0.101092	-0.00256476	-0.0212351	-0.0272838	-0.0617925	-0.0812845	0.10872	0.0825535	0.30503	-0.17591	-0.292836	0.0682106	-0.0527616	0.0780626	0.0823689	0.0869775	-0.0256296	-0.11199	-0.0475817	0.0754682	0.0961798	-0.0114811	-0.11255	-0.0626191	0.0666977	0.104052	0.00355449	-0.11087	-0.0774385	0.0560888	0.110392	0.0192192	-0.106862	-0.0917174	0.0437059	0.11501	0.0352364	-0.100488
Numbl_39.157	0.278567	-0.0763843	-0.174262	-0.0857269	-0.388911	0.00476428	-0.152814	0.356392	-0.0820873	-0.104791	0.121333	0.18437	0.194527	0.0567988	-0.634442	0.342212	-0.0376747	-0.253467	0.341044	-0.338337	-0.00433342	-0.382809	0.234323	0.080263	0.00226361	0.0784692	0.0404743	-0.0519395	-0.0658783	0.0116884	0.0631263	0.0236727	-0.0463555	-0.0467198	0.0166045	0.0496484	0.0118382	-0.0398894	-0.0321342	0.0184889	0.0381831	0.00383968	-0.0333304	-0.021242	0.0184193	0.028695	-0.00128157	-0.0271571
Vps33a_125.569	0.10619	0.0393704	0.151111	-0.814298	0.172148	0.0763409	-0.00914918	0.271721	0.007874	-0.152298	-0.0194556	0.0596285	0.00251785	-0.105772	-0.28135	0.366899	0.0395571	-0.0190858	-0.0454308	-0.311715	0.0489409	0.0493887	-0.0453876	0.0420808	-0.0106185	0.0807526	0.0551564	-0.0541957	-0.0886946	0.00663463	0.0879201	0.0423353	-0.0698075	-0.0831577	0.0244279	0.0922246	0.0270269	-0.0837597	-0.0740659	0.042115	0.0933614	0.00960676	-0.0953541	-0.0616217	0.05904	0.0911092	-0.0094379	-0.103938
Atp2c1_377.015	-0.0235392	0.0757442	0.0150124	-0.118503	-0.0678991	0.0257509	0.122429	-0.0697523	-0.000583126	-0.161121	0.0358281	0.144291	0.0331279	0.0275058	-0.3655	0.336773	-0.0227864	-0.0723338	0.112669	-0.197697	-0.0397127	0.0843495	-0.0431778	0.0274942	0.0367075	0.0819569	0.0147696	-0.0747723	-0.0596228	0.0350118	0.0760392	0.0127017	-0.0697206	-0.0544966	0.033364	0.0705261	0.0108516	-0.0650031	-0.0498012	0.0317663	0.0653922	0.00919927	-0.0605981	-0.0455001	0.0302202	0.0606136	0.00772641	-0.0564851
Cgrrf1_248.583	0.000763689	0.0850437	-0.189203	0.00458792	0.095708	-0.0522744	0.067084	-0.00655572	0.104995	-0.350815	0.0805131	0.119299	0.078183	0.031753	-0.281121	0.107999	0.105419	-0.0494031	-0.0590734	-0.0904779	0.0432467	0.10062	-0.0332743	-0.0299535	-0.023743	0.0392229	0.0435678	-0.0182253	-0.055394	-0.00915151	0.0499549	0.0347109	-0.0344385	-0.0541467	0.00771495	0.0570261	0.0214931	-0.0491962	-0.0474419	0.02543	0.0594242	0.00462585	-0.060826	-0.0354169	0.0423878	0.0564403	-0.0147386	-0.0677608
Gclc_7635.619	0.118663	-0.00517587	-0.101438	0.00258077	-0.140667	-0.118415	0.0659779	0.0255326	0.0973078	-0.0503367	0.070097	0.131678	0.0701731	0.0844662	-0.177996	-0.109268	-0.00707916	-0.0895979	-0.101164	0.0966066	0.0419826	0.108092	-0.0791526	-0.00191069	-0.0185294	0.0331491	0.0333348	-0.0149012	-0.0393984	-0.00523143	0.0334367	0.0213584	-0.0212554	-0.0308477	0.00474819	0.0305907	0.0107037	-0.0238668	-0.02186	0.0114557	0.0257381	0.00199347	-0.023528	-0.0134012	0.015216	0.0198722	-0.00449527	-0.021097
Ppp1r1b_26.541	0.180331	0.0846309	0.0177251	-0.871793	-0.0286114	0.283869	-0.0448247	-0.157742	0.303687	-0.150293	0.399524	-0.105838	0.0265972	-0.309923	-0.577388	0.504458	0.215871	-0.214446	0.0263866	-0.100096	0.0126972	-0.256229	-0.191298	0.250425	0.157322	0.112733	-0.0837971	-0.182943	-0.0404171	0.134391	0.131141	-0.0431891	-0.174538	-0.0747221	0.106553	0.141385	-0.00500919	-0.157573	-0.102703	0.0754024	0.14383	0.0291474	-0.133944	-0.123162	0.042624	0.139086	0.0581234	-0.105744
Bambi_464.57	0.00118802	-0.00445947	0.106613	-0.13981	0.0869648	-0.110497	0.00855326	-0.117944	0.122009	-0.232212	0.0660431	-0.011381	0.114279	0.176331	0.0398124	-0.277733	0.27954	-0.00914019	-0.184041	0.0166507	-0.201363	0.0749169	-0.0514771	0.0988222	-0.00115443	0.006561	0.00429135	-0.00350529	-0.00546916	0.00027067	0.00482694	0.0021949	-0.00306152	-0.00343169	0.000909944	0.00340389	0.000928632	-0.0024689	-0.00204063	0.00109833	0.00230563	0.000213669	-0.00188015	-0.00112854	0.00105015	0.00149819	-0.00015109	-0.00136689
Dgkd_689.051	0.0895098	-0.0903983	-0.0856521	-0.143524	0.0504175	-0.101841	0.0933393	0.0489251	0.124492	-0.273957	0.204262	0.280527	0.0726378	0.0290704	-0.857876	-0.0979664	0.0343907	-0.165543	0.352575	-0.0575039	0.286308	0.0776313	-0.137471	-0.150525	0.040284	0.032549	-0.0195297	-0.04918	-0.0141701	0.0401095	0.0431179	-0.0115258	-0.0551308	-0.0267421	0.0373734	0.0537542	-0.000695066	-0.0591406	-0.0411357	0.0315406	0.0638265	0.0129873	-0.060407	-0.0569432	0.0221062	0.0725821	0.0293672	-0.0581004
Zfp213_47.097	0.00846547	0.203914	-0.0644332	-0.365215	-0.0141665	-0.477448	0.51904	0.125107	-0.145727	-0.132202	-0.104465	-0.0561846	0.349377	-0.117993	-0.172531	0.360281	-0.111764	0.0314534	-0.273615	-0.391674	0.152573	0.356482	-0.519506	0.234322	-0.0565347	0.224932	0.167263	-0.140907	-0.255375	0.00357475	0.203989	0.106	-0.154505	-0.189833	0.0433663	0.176618	0.0552253	-0.153145	-0.133377	0.0673945	0.146269	0.0154805	-0.141576	-0.0867412	0.0794177	0.115611	-0.0136047	-0.123911
Prkab1_543.168	-0.0966832	0.0790981	0.0467613	-0.0500813	0.0586381	0.0846429	0.0675374	-0.219477	-0.124084	-0.217881	0.0744156	0.054313	-0.0559228	-0.0866787	0.144012	0.304093	0.190311	-0.0123233	0.0133764	-0.445508	-0.146456	0.00378116	-0.014059	0.158844	0.0341016	0.0327384	-0.0137376	-0.0460605	-0.0175223	0.0359974	0.0439083	-0.00765289	-0.0544119	-0.029943	0.036018	0.0566236	0.00167617	-0.0622973	-0.0457406	0.033327	0.0706034	0.0149227	-0.0688718	-0.0652711	0.0269033	0.0853633	0.0327294	-0.0730078
Abhd17c_3921.713	0.0139754	0.0184384	0.0273761	-0.0975182	-0.0714585	0.0788424	0.0967218	-0.152407	-0.0188728	0.0406798	0.0404965	0.0808084	-0.108372	-0.0714618	0.0251731	0.0969054	0.0949632	-0.0933681	0.09947	-0.243214	0.0561974	0.00780315	-0.0344207	0.0502246	0.0643243	0.0418831	-0.0350318	-0.0677713	-0.0128199	0.0549709	0.0512031	-0.0183483	-0.0655592	-0.0276254	0.0429957	0.0565906	-0.00211041	-0.0594033	-0.0395779	0.029302	0.0580843	0.0127287	-0.0500611	-0.0481133	0.0148385	0.0559315	0.0254078	-0.0384334
Pten_1011.233	0.132365	-0.135374	0.00613047	-0.0867611	-0.0549738	0.0308735	0.0449819	0.0586743	0.0770335	-0.0765465	-0.043012	0.116461	-0.0354036	0.0791646	-0.168669	-0.0464561	0.0692671	-0.0322315	0.00716024	-0.0555956	0.0613823	0.0312304	0.0105989	-0.036277	0.0233939	0.0429899	0.00392511	-0.0413234	-0.0296566	0.0218101	0.0421699	0.00498648	-0.0397791	-0.0297743	0.0202743	0.0413345	0.00598769	-0.0382592	-0.0298459	0.0187864	0.0404856	0.00693048	-0.0367644	-0.0298736	0.017346	0.039625	0.00781657	-0.0352956
Suds3_727.875	0.0679828	0.066465	0.0773415	-0.15538	-0.198598	-0.0967639	0.0225993	0.0574488	-0.157444	-0.0159987	0.109994	0.0285848	0.102313	0.0571225	0.0481055	0.392549	-0.0552634	-0.209849	-0.215819	-0.219576	-0.130323	0.0855115	0.0969	0.0735397	0.0173275	0.0868652	0.0346961	-0.0714617	-0.0786098	0.0251265	0.089344	0.0283959	-0.0782573	-0.0757585	0.0330703	0.0912637	0.0215351	-0.0847896	-0.0721661	0.0411036	0.0925841	0.0141338	-0.0909889	-0.0678294	0.0491689	0.0932673	0.0062169	-0.0967841
Sirt4_23.66	0.0545187	-0.107169	-0.0259909	0.209682	-0.0893117	-0.0887982	0.0313126	-0.000560027	-0.316105	-0.0433417	0.118575	0.26424	-0.00238951	-0.0649016	0.117042	-0.0199797	0.101972	-0.051259	-0.391822	0.0183586	-0.00811494	0.147065	0.0272618	-0.0392432	-0.025847	0.0440233	0.0482895	-0.0206498	-0.062018	-0.0102133	0.0557319	0.0390106	-0.0382991	-0.0610722	0.00793917	0.063768	0.0250811	-0.0546833	-0.0543899	0.0272098	0.0670579	0.00711133	-0.0680788	-0.0419945	0.0459956	0.0647932	-0.0138464	-0.0768066
Zdhhc6_44.4	-0.130138	0.02527	-0.0308279	0.0506355	-0.0263643	0.222619	0.13495	0.138292	-0.258054	-0.174485	-0.0839926	-0.144046	0.0262368	0.00331247	-0.184942	0.0736944	0.254413	0.100992	0.012692	-0.168897	-0.187876	0.324607	-0.0608957	-0.103866	0.041143	0.0798295	0.00812048	-0.087681	-0.066588	0.0499448	0.101558	0.0133313	-0.111287	-0.0880208	0.0604166	0.128848	0.0207486	-0.141435	-0.11645	0.0727989	0.162952	0.0311566	-0.180101	-0.15433	0.0873383	0.205319	0.0455782	-0.229979
Yaf2_3193.821	-0.0333579	0.0505595	-0.0366862	-0.0466495	0.0717509	-0.036596	0.0621409	0.0182006	0.0283365	-0.119185	0.0036778	-0.0255637	0.0623411	0.0935388	-0.0994997	-0.234081	0.129058	0.0561431	0.0402783	0.00931315	-0.0077234	-0.0100554	6.5774e-06	-0.021169	0.00407571	0.00616181	-0.000271375	-0.00689914	-0.00434569	0.00453949	0.00774813	0.000297007	-0.00825309	-0.00587454	0.00497381	0.00968273	0.0011341	-0.00981079	-0.00783468	0.00533873	0.0120283	0.00232631	-0.0115845	-0.0103307	0.00557827	0.014855	0.00398261	-0.0135801
Ddx19a_1907.377	-0.0382603	-0.0958938	0.0784816	-0.0928926	0.0380963	0.0798296	0.129819	0.136914	-0.0384078	-0.0465399	-0.0897108	-0.0866693	0.0305131	-0.0805206	-0.381487	-0.0948231	0.145973	0.31405	0.00255704	0.0408345	0.0599193	-0.0412277	0.0133319	-0.11812	0.0195192	0.0279638	-0.00342809	-0.0371069	-0.0224379	0.0280032	0.0465629	-0.000101828	-0.0585027	-0.0418046	0.039133	0.0763929	0.00852848	-0.0916064	-0.0763145	0.0528349	0.123308	0.0274191	-0.142631	-0.137763	0.0679839	0.195319	0.0650539	-0.221237
Spred1_676.568	0.128643	-0.153573	-0.106537	-0.159235	-0.0330612	0.0204824	0.331152	0.147829	0.0965402	-0.25062	-0.0686627	0.134557	-0.0357979	-0.0137591	-0.599527	0.0887135	-0.0195021	-0.01425	0.144894	-0.0596372	0.364869	0.0107344	-0.0664798	-0.178976	0.093554	0.0917221	-0.0318629	-0.119581	-0.0470919	0.0797815	0.0977114	-0.0128157	-0.112707	-0.0618752	0.0646886	0.100835	0.00515505	-0.103231	-0.0742044	0.0487121	0.101205	0.0216739	-0.0916134	-0.0838509	0.0322961	0.0989868	0.036437	-0.0783415
Ywhaz_14287.581	0.0335493	0.0216538	0.00367141	-0.0994177	-0.0419068	0.0183721	0.00920034	0.0711764	0.00900431	-0.114506	0.0347392	0.0490702	0.027052	-0.0649066	0.086368	-0.0119543	-0.00621544	0.00180561	0.0110049	-0.0126914	-0.0715731	-0.0499366	0.0407501	0.0354135	0.0107621	0.0645888	0.0260651	-0.0430905	-0.0461251	0.011897	0.0446386	0.0140984	-0.0315709	-0.0292474	0.0111341	0.0305058	0.00700075	-0.0228245	-0.0183207	0.0095754	0.0206258	0.00294649	-0.016308	-0.0113016	0.00781638	0.013801	0.00074783	-0.0115279
Ngrn_1964.6	-0.0340956	-0.0268694	0.113477	-0.118047	0.0477657	0.0369117	-0.0139193	-0.0220765	0.0574083	-0.0167692	0.019843	0.000840396	-0.00411881	-0.0794442	-0.0370023	-0.234237	0.0889207	0.145538	0.143956	-0.00678782	-0.0898674	-0.0149702	0.00996409	-0.0207403	-0.00461546	0.0079897	0.00997758	-0.00413596	-0.0144626	-0.00299237	0.0156481	0.0122854	-0.0122235	-0.0218251	0.00269487	0.0274115	0.0120368	-0.0269918	-0.0297419	0.0159038	0.0437737	0.00531156	-0.0516757	-0.0350031	0.0415634	0.0637488	-0.0148914	-0.0897181
Nus1_1156.838	0.0108251	0.036739	0.0206919	-0.173084	0.0356698	0.0492378	-0.0102935	0.0638385	-0.0889857	-0.052397	0.0809882	0.0607265	0.0892108	-0.160497	-0.0637529	0.0951329	0.0199341	-0.0845224	0.0616658	0.00352152	-0.0516152	-0.0163126	0.0328289	-0.0015028	0.0694121	0.048578	-0.0336326	-0.0712714	-0.0164738	0.0534569	0.0519647	-0.0151784	-0.0616822	-0.0274939	0.0378448	0.0511747	-0.000433013	-0.0503982	-0.0340314	0.0234968	0.0472839	0.0106117	-0.0386175	-0.0367199	0.0110485	0.0412908	0.0181939	-0.0272569
Ikbkb_104.115	0.0723109	-0.147953	-0.324006	-0.128152	0.258333	0.0684418	0.170454	0.355857	-0.391064	-0.409378	0.178251	-0.0651237	0.0814452	0.0728162	-1.36186	0.535224	0.163124	0.257617	0.0845362	-0.146813	-0.0503441	0.0290298	-0.0999418	-0.0992872	0.0958045	0.0671222	-0.0520224	-0.110073	-0.0242302	0.0873134	0.0859774	-0.0280146	-0.113777	-0.0509805	0.0729822	0.100539	-0.00132822	-0.110362	-0.0765428	0.0532018	0.109811	0.0264491	-0.0996824	-0.0991194	0.0286922	0.113024	0.0536618	-0.0821365
Polr3c_675.368	-0.0767722	0.0227378	0.0831191	-0.0819782	0.052931	0.0242805	0.0127732	0.0551038	0.0357095	-0.183743	0.0325589	-0.0893576	0.101107	-0.169091	-0.0710345	0.0120847	0.139815	0.176412	0.105521	-0.204482	-0.0788184	0.0253833	-0.0322418	0.0300451	0.00491625	0.0152956	0.00431911	-0.01544	-0.0153519	0.00808091	0.0232549	0.0058771	-0.0240798	-0.0229346	0.0131949	0.0352761	0.00786974	-0.0375745	-0.0342557	0.0214107	0.0533534	0.0103204	-0.0587214	-0.0511838	0.0345246	0.0803729	0.0131568	-0.0920545
Ptdss1_752.244	-0.0412596	-0.0609521	0.203721	-0.0172926	-0.168971	0.149887	-0.0441132	-0.0391534	-0.192296	0.193473	-0.0897968	-0.122328	-0.0121482	-0.0816743	0.177985	0.272534	-0.0826625	-0.00988946	0.061373	-0.0512556	-0.23296	-0.115523	0.0497642	0.110745	-0.00973975	0.060018	0.0458631	-0.0430082	-0.0795744	0.00303829	0.0868287	0.0477432	-0.0751354	-0.100989	0.0260645	0.120615	0.0426391	-0.122465	-0.122282	0.063518	0.161223	0.0252834	-0.190515	-0.139071	0.12008	0.207333	-0.0124181	-0.286496
Stk35_92.284	0.0881292	-0.288231	0.0810331	-0.113542	-0.130372	0.161157	0.200163	0.262949	0.171295	-0.468807	-0.096338	-0.135473	0.146885	0.0467085	-0.644154	0.0635785	0.121115	0.0808429	0.115505	-0.209529	0.31359	0.188033	-0.27237	-0.100489	-0.0295025	0.0491248	0.0570504	-0.0237636	-0.077821	-0.0145104	0.0728887	0.0542154	-0.0530541	-0.0904158	0.0102619	0.0974045	0.0414966	-0.0900852	-0.0950436	0.0456026	0.119462	0.0154041	-0.133237	-0.086716	0.0909759	0.134716	-0.0277094	-0.178724
Akt2_504.269	0.0289813	0.0319514	-0.00521111	-0.319055	0.15997	0.0364499	0.109855	0.110093	-0.0548548	-0.424178	0.133952	0.0846064	0.00455931	-0.0516318	-0.121611	0.250702	-0.015871	0.0942848	-0.00926673	-0.124896	-0.0941716	-0.074693	-0.00180976	0.0882617	0.0715799	0.108057	0.00108463	-0.10801	-0.0670854	0.0554101	0.0931451	0.00692521	-0.0881472	-0.0607704	0.0422867	0.0799054	0.0108546	-0.071686	-0.054559	0.0317246	0.0682295	0.0133267	-0.0580683	-0.0486031	0.0232984	0.0579966	0.0147003	-0.0468279
Atp5j2_10432.032	0.0276311	0.0679218	-0.0249074	-0.0692503	-0.0341037	-0.0854534	0.00652475	-0.019042	0.0822582	-0.0307768	0.0461425	-0.0185134	0.0729901	0.0257535	0.0355715	0.0971405	-0.100812	-0.0804636	-0.113501	0.0895725	-0.0907873	0.0298757	0.0498987	0.00327275	0.034037	0.0417776	-0.00679199	-0.0485875	-0.0252751	0.0316304	0.0462102	-0.0012071	-0.0495556	-0.0317089	0.0284317	0.0503207	0.0049606	-0.0497668	-0.0383041	0.0244074	0.0540095	0.0116624	-0.0491375	-0.0449633	0.0195329	0.0571742	0.0188361	-0.0475912
Ptdss2_238.3	0.0721207	0.0331584	-0.0629272	-0.223128	0.0030569	-0.103779	0.174326	0.175371	0.044803	-0.290389	0.146711	0.0308721	0.0448324	-0.0211287	-0.362765	0.227654	0.030007	0.00664052	0.00994857	-0.200155	0.00774197	0.125496	0.0397345	-0.0734838	0.0204948	0.0773376	0.0266122	-0.0664804	-0.0682486	0.0259239	0.0815537	0.0237143	-0.0731261	-0.0690964	0.0317876	0.0857403	0.0203312	-0.0800931	-0.0695972	0.0380958	0.0898696	0.0164259	-0.0873752	-0.069708	0.0448564	0.0939111	0.01196	-0.0949632
Mtrr_236.737	-0.219947	-0.0621441	0.080751	-0.341043	0.235106	0.326244	0.283195	0.0894127	0.101421	-0.195301	-0.259402	-0.313198	-0.122145	-0.175603	-0.751022	-0.084387	0.194773	0.466801	0.277473	0.462542	-0.176546	-0.140402	-0.186494	-0.136983	0.130923	0.0559917	-0.114267	-0.161162	0.00284136	0.165382	0.130611	-0.092502	-0.246524	-0.0815932	0.181749	0.225992	-0.0245438	-0.332468	-0.226384	0.160266	0.331762	0.10191	-0.38613	-0.455092	0.0708257	0.429798	0.286948	-0.354617
Trim35_834.304	0.0991915	-0.0967014	0.0204105	-0.289762	0.044684	0.129815	0.0160815	0.180161	0.0919753	-0.19995	-0.0431255	0.0925098	-0.0907504	-0.0943766	-0.241207	0.160955	0.0320397	0.145679	0.0700497	-0.309732	0.174092	-0.0563099	0.0725112	-0.07125	0.00323656	0.0920443	0.0511667	-0.0711964	-0.0985841	0.0172629	0.106265	0.0454108	-0.09181	-0.104076	0.0344355	0.120673	0.036398	-0.115224	-0.107282	0.0549512	0.134846	0.023473	-0.141432	-0.107425	0.0789321	0.148267	0.00589883	-0.170312
Usp3_1759.099	-0.00325739	-0.0189375	0.0337025	-0.0199413	0.0788998	-0.040646	-0.0395409	-0.0890341	0.109062	-0.125997	0.0482363	-0.0133224	0.0665158	-0.0809596	0.0579425	-0.0560027	0.201116	0.0341843	-0.147995	0.00967637	-0.103755	0.00642988	-0.0206779	0.0634657	-0.000674021	0.00931877	0.00619362	-0.00668442	-0.0107748	0.0010702	0.0123957	0.00608487	-0.0101833	-0.0127034	0.00377872	0.0160524	0.00525849	-0.0147752	-0.0144671	0.00775554	0.0202574	0.00335558	-0.0206527	-0.0157722	0.0133541	0.0249032	-9.37733e-05	-0.0279916
Sec14l1_92.324	0.296504	-0.0503078	-0.83362	-0.168673	0.17205	0.120353	0.149109	0.412012	0.0241528	-0.569576	-0.0285871	0.108828	-0.112038	-0.0838442	-1.10538	0.386026	0.615259	0.109409	0.0696367	-0.735094	0.119766	0.104922	-0.105992	-0.0582748	-0.00100699	0.038145	0.0239548	-0.0291811	-0.0449472	0.00596737	0.0521566	0.0247321	-0.0453077	-0.0555581	0.0173656	0.069718	0.022812	-0.0678479	-0.0667488	0.0349208	0.0911483	0.0163842	-0.0988386	-0.0773991	0.0607646	0.116514	0.00280253	-0.140851
Slc48a1_501.189	-0.0461296	0.121525	0.0547642	-0.132152	-0.0443578	-0.0202942	0.0617822	-0.129209	-0.122579	0.0441469	0.222829	-0.108917	0.100916	-0.128106	-0.0197265	0.297767	-0.0314656	0.00991461	-0.221962	-0.0674264	0.00445353	-0.0156284	-0.0190145	0.0775646	0.0546713	0.0426792	-0.0258539	-0.0631408	-0.0178762	0.0489321	0.0521015	-0.0128064	-0.063907	-0.0316124	0.040408	0.0592337	0.00135053	-0.0613198	-0.0444193	0.0293739	0.0636436	0.0159134	-0.0553842	-0.0555513	0.0162429	0.06501	0.0301483	-0.0463003
Ppp2cb_2585.887	0.105536	0.0393394	0.0256755	-0.286699	-0.0751808	-0.0305452	0.0216937	0.156515	-0.0288233	-0.0375609	0.0862293	0.0315321	0.031698	-0.0354472	-0.00574151	0.14213	-0.0545637	-0.0279022	-0.078541	-0.162445	0.0723287	-0.0179188	-0.0117122	0.0700641	0.0367932	0.0949691	0.0231979	-0.074388	-0.0631504	0.0278956	0.0684395	0.0152528	-0.0535245	-0.0440327	0.0210632	0.0491716	0.00993259	-0.0385655	-0.0307383	0.0158471	0.0352452	0.00639612	-0.0278098	-0.021469	0.0118848	0.0252166	0.00406357	-0.0200622
Pias4_102.124	-0.0729676	0.10117	-0.0586528	-0.369517	0.305864	-0.219362	0.250902	0.392361	-0.350693	-0.485114	0.363724	0.043233	0.0646749	-0.232003	-0.631401	0.240764	0.141577	0.144431	-0.0289273	0.0953018	-0.00988254	-0.129804	-0.10603	0.0164788	-0.0125528	0.146203	0.0924572	-0.0975502	-0.149467	0.0124253	0.135164	0.0637095	-0.10283	-0.120739	0.0310376	0.121816	0.03873	-0.103044	-0.0943587	0.0441847	0.107097	0.0176649	-0.0993229	-0.0707491	0.0527126	0.0917946	0.000484788	-0.0927128
Pank4_129.419	-0.0114005	0.134464	0.0604487	-0.299221	0.00214256	-0.0195016	0.00366586	-0.0152935	0.060916	0.0589394	0.0523914	0.0552842	-0.0170955	-0.00728335	-0.195118	0.0102002	0.0686423	0.121433	-0.0517342	-0.022189	-0.168834	0.077824	-0.00118063	0.0282367	0.061164	0.101723	0.00694957	-0.0952263	-0.0638134	0.0455809	0.0828322	0.00947469	-0.0740581	-0.0535861	0.0336299	0.0672139	0.0106931	-0.0575287	-0.044808	0.0245322	0.0543617	0.0110265	-0.0446154	-0.0373239	0.0176589	0.0438314	0.0107801	-0.0345296
Knop1_405.482	-0.0243739	-0.054602	0.0497008	-0.170712	0.176541	0.0312355	0.0376319	0.204544	-0.0338857	-0.194725	-0.0941368	-0.153877	0.0956141	0.0612378	-0.239135	0.119862	-0.0872941	0.273841	-0.0404215	-0.00579941	-0.00449297	-0.0233597	-0.0223243	-0.0239533	0.00994771	0.0296235	0.00815083	-0.0267091	-0.0253816	0.0121411	0.0337607	0.00846044	-0.0310619	-0.0284326	0.0147458	0.0384439	0.00868656	-0.036101	-0.0318191	0.0178314	0.0437395	0.00879894	-0.0419334	-0.0355726	0.0214782	0.0497207	0.00876042	-0.0486832
Wbp2_1386.215	0.0914181	-0.0782979	0.0876266	-0.199293	-0.0703264	-0.02912	0.0554166	0.100324	0.0178781	0.0311203	0.000405629	0.0667118	-0.0159215	-0.121017	-0.255223	0.322384	0.00762457	-0.108091	0.054976	-0.237624	0.0901672	0.0941381	0.0335013	-0.0649367	-0.0144092	0.0232418	0.0284498	-0.0109465	-0.0387043	-0.00829644	0.0380095	0.0297145	-0.0274408	-0.0492265	0.00454175	0.0558001	0.025261	-0.051197	-0.0568285	0.026373	0.0750212	0.0114307	-0.0827913	-0.0573114	0.0590719	0.092608	-0.0164858	-0.121385
Dctd_214.078	-0.398305	-0.203479	0.113051	-0.202202	0.495018	0.0934602	0.446534	0.138274	0.189246	-0.361308	-0.355419	-0.505094	-0.168057	-0.38871	-0.988119	-0.29867	0.270782	0.791147	0.344557	0.382399	0.153632	-0.214413	-0.233832	-0.373781	0.0179044	0.0184255	-0.0077648	-0.0285175	-0.0120299	0.0248277	0.0329991	-0.00502984	-0.0447801	-0.0275036	0.032291	0.0564387	0.00404517	-0.0680079	-0.0561471	0.0380982	0.0926091	0.0254121	-0.0994611	-0.107453	0.037332	0.145946	0.0686883	-0.138748
Fam214b_186.207	-0.119039	0.15551	0.0822736	0.12479	-0.299811	0.153843	-0.13013	-0.264238	-0.144963	-0.0674315	0.233305	0.18757	0.194214	0.00190339	-0.131726	0.150388	-0.0601188	-0.0519047	-0.1198	-0.136826	-0.0611452	0.0970143	-0.0598384	0.0879064	0.0420576	0.0186559	-0.0288925	-0.0405851	-0.00124158	0.0384854	0.0299488	-0.0164879	-0.0430264	-0.0152691	0.0306624	0.0377171	-0.00248422	-0.0405371	-0.0275298	0.0194568	0.0411886	0.0115023	-0.0334773	-0.0366069	0.00610456	0.0400536	0.0239201	-0.022751
Gdi2_16176.062	0.0136969	0.000503486	-0.0172623	-0.0303101	-0.0429309	0.0163658	0.0608574	0.0381958	0.0221174	-0.0152465	0.0291247	-0.0118215	-0.0261893	-0.079057	-0.0423667	0.000968984	0.0135708	0.0417886	0.0139151	0.0162644	0.0127063	-0.00323931	0.0123489	-0.0318946	0.00119409	0.0215575	0.0110388	-0.0147344	-0.019043	0.00344888	0.0200088	0.00800101	-0.0149468	-0.0161842	0.00523604	0.0183233	0.00532663	-0.0148147	-0.0134978	0.00660198	0.0165585	0.00300771	-0.0144014	-0.0110085	0.0075933	0.014764	0.00103033	-0.0137647
Capn1_751.551	0.0589085	-0.00524872	-0.0770175	-0.1072	0.0291259	0.0320985	0.0823672	-0.0582522	-0.101384	-0.123557	0.020234	0.178789	0.0251586	0.0330821	-0.286329	0.33419	-0.050311	-0.0443237	0.126756	-0.560365	0.173723	0.108554	0.0222796	-0.0309076	0.0720897	0.0400384	-0.048697	-0.0816397	-0.00914637	0.075478	0.0667238	-0.0310664	-0.0991748	-0.0403643	0.070061	0.0935096	-0.00326809	-0.109203	-0.0781422	0.053292	0.11704	0.0340776	-0.107439	-0.119795	0.0229537	0.133351	0.0788585	-0.089979
Eral1_311.793	-0.00712579	0.0522187	-0.00206989	-0.122812	-0.0889042	0.0736462	0.0848966	-0.0993715	0.00979172	-0.0424657	-0.0123966	0.0196122	0.123485	0.0782902	-0.685899	0.328947	0.152659	0.188885	-0.00696924	-0.178137	-0.131508	-0.0329525	-0.062432	0.111299	0.0149147	0.00688333	-0.00915624	-0.0130987	-0.000793618	0.0116328	0.00910781	-0.00441528	-0.0117988	-0.00430696	0.00792767	0.00971856	-0.000462461	-0.0095245	-0.00640002	0.004324	0.00908173	0.00247485	-0.00679517	-0.00721545	0.0011973	0.00760211	0.00434425	-0.00404053
Vamp7_2738.532	0.093313	-0.0162173	-0.0572057	-0.0574765	-0.0267666	-0.0816066	0.0858876	-0.0383172	0.040619	-0.112646	-0.00665396	0.0407371	0.239403	0.0763977	0.0521288	-0.234505	0.0316649	-0.0512277	-0.107724	-0.0475386	-0.0520891	0.157924	0.0466675	-0.0508574	0.0332087	0.02001	-0.0178626	-0.0320603	-0.00549208	0.0260714	0.0235911	-0.0082762	-0.0287466	-0.0122855	0.0183381	0.0244599	-0.000154583	-0.0237825	-0.0165955	0.010764	0.0231431	0.00616929	-0.0179522	-0.0185953	0.00393513	0.0202234	0.0105843	-0.011935
Atp1b1_7019.332	-0.0089812	-0.0846842	0.129384	0.00753005	-0.0364493	0.0425807	0.00198781	-0.115499	-0.123858	0.0509638	-0.0539661	0.084813	-0.159466	-0.123512	0.0978035	0.444889	0.0927946	-0.131391	0.0100052	-0.315908	-0.0375232	-0.0510531	-0.00147697	0.116768	-5.15855e-05	0.000997673	0.00062783	-0.000683159	-0.0010502	0.000110783	0.00116161	0.000552338	-0.000898357	-0.00109492	0.000310079	0.00132286	0.000436659	-0.00113393	-0.00110925	0.000548063	0.00147461	0.000274999	-0.00138607	-0.00108495	0.000825469	0.00160868	6.18439e-05	-0.00164937
Casc3_485.119	0.0766545	-0.0933021	-0.0317021	-0.150415	0.0620893	0.150283	-0.0164124	0.182924	-0.06446	-0.144755	-0.0715046	0.0622485	-0.00307697	-0.16663	-0.181337	0.17886	0.138832	0.169877	0.0295682	-0.262532	0.063997	-0.07879	-0.0283921	0.055054	0.0328739	0.0392814	-0.008644	-0.050966	-0.0260696	0.0366112	0.0537089	-0.00232921	-0.0634712	-0.0418729	0.0389291	0.0716445	0.00824619	-0.0773438	-0.0636917	0.0386797	0.0934196	0.0246211	-0.0919544	-0.0932831	0.0342276	0.119185	0.0486308	-0.106149
D430020J02Rik_179.579	-0.0074536	-0.0708287	0.237406	-0.266137	-0.0531147	0.0808327	0.0834614	0.0894535	-0.0466633	-0.183003	0.0688068	-0.0658465	0.107877	0.0928497	-0.260797	-0.028006	0.212797	-0.0160146	-0.185322	0.0615486	-0.0457636	0.0892183	0.064387	-0.0958704	0.0368298	0.0778079	0.0121096	-0.078812	-0.0637668	0.040276	0.0895052	0.0163271	-0.0897951	-0.0755134	0.0438989	0.102832	0.0215111	-0.102274	-0.089376	0.0476723	0.117988	0.0278455	-0.116453	-0.105747	0.0515589	0.13519	0.0355443	-0.132565
Pofut1_62.376	0.0824855	0.0778104	-0.391229	-0.213031	-0.169725	0.427406	0.175287	0.0312115	0.0562228	-0.587833	0.152418	0.279454	-0.113639	-0.28755	-0.530303	0.528396	-0.221691	0.207092	0.235808	-0.675096	0.16228	0.165292	0.0414838	-0.181584	0.19774	0.126187	-0.119362	-0.229812	-0.0399754	0.170899	0.159982	-0.058836	-0.225114	-0.0958422	0.13289	0.179807	5.37048e-05	-0.202601	-0.142582	0.0864949	0.185573	0.0531858	-0.165791	-0.176282	0.0350594	0.177877	0.0975092	-0.119267
Srxn1_320.365	-0.0370393	0.144351	-0.0216165	-0.131257	-0.0213666	0.189099	-0.0784735	-0.14978	-0.277538	-0.105025	-0.0476131	0.173663	0.233579	0.0671197	-0.0579774	0.284471	-0.00515301	0.0758082	0.0017283	-0.52089	-0.11372	-0.155054	0.15302	0.154772	0.104449	0.0491865	-0.076002	-0.111974	-0.00508222	0.103654	0.0840985	-0.0462046	-0.129537	-0.0475863	0.0897125	0.113822	-0.00598374	-0.132807	-0.0928021	0.0617012	0.134147	0.0407155	-0.118733	-0.135079	0.0199981	0.141313	0.0887985	-0.0865987
Elk1_49.402	-0.0986002	0.0158362	0.0772558	-0.0316142	-0.121237	-0.0319597	0.106633	0.0569691	-0.0571841	-0.458799	0.456903	-0.0412402	0.233554	0.012588	-0.62673	0.0119796	-0.101883	0.254231	-0.271309	-0.0138231	0.0620203	0.475822	-0.150285	-0.227118	0.0621294	0.0925241	-0.00342451	-0.108506	-0.0684886	0.0651752	0.11208	0.00732486	-0.124979	-0.0914977	0.0666655	0.134426	0.0219341	-0.142617	-0.120161	0.0659189	0.159682	0.0412185	-0.161073	-0.155699	0.0620659	0.1879	0.066069	-0.179803
Hoxa10_180.945	0.0914318	-0.023113	-0.0119557	-0.218054	-0.117236	0.0696989	0.0436223	0.163409	-0.0923005	0.0665525	-0.335003	0.0572429	0.453827	0.0960768	-0.505524	0.0694994	-0.170617	0.200867	-0.0991931	0.0224445	-0.184731	0.184946	0.00187909	-0.0571582	0.0206894	0.0267835	-0.00357358	-0.0313935	-0.0175655	0.0207795	0.0324253	0.000272292	-0.0349425	-0.024097	0.0200582	0.0385856	0.00535441	-0.0382253	-0.0318237	0.018287	0.0451851	0.0118613	-0.0410154	-0.0408325	0.0151888	0.0521026	0.0199815	-0.0430315
Cers5_115.08	-0.0584744	-0.0135301	-0.0633198	0.104067	0.205529	0.0531136	-0.0795807	-0.0371122	-0.358625	-0.0529451	-0.0154595	-0.0988745	0.213163	0.346874	-0.102133	-0.0539028	-0.051183	-0.0152985	0.0355017	0.0264581	-0.198846	0.0117646	0.00461421	0.0454514	0.000900943	0.00821196	0.00395795	-0.00621136	-0.00782645	0.00179443	0.0091484	0.00359027	-0.00741514	-0.00815811	0.00284128	0.0101085	0.00307712	-0.00873263	-0.00840464	0.0040537	0.011079	0.00239748	-0.0101629	-0.00854339	0.0054433	0.0120441	0.00152896	-0.0117026
Myo1c_3292.442	0.000920388	0.00562823	-0.0157182	-0.0464254	0.0740851	0.0230084	-0.0472185	0.0575458	-0.167525	-0.163693	0.000876522	0.0761762	-0.0386183	0.0716903	-0.0372037	0.352047	0.0527605	-0.072474	-0.00570921	-0.469365	0.180844	-0.134793	0.0508813	0.0847202	-0.0124832	0.016401	0.0230694	-0.00656332	-0.0307406	-0.00883541	0.0301084	0.0263284	-0.0210225	-0.042584	0.00153227	0.0485196	0.024591	-0.0443744	-0.0531797	0.0222372	0.0706792	0.0130414	-0.0788184	-0.0575908	0.0571396	0.0935679	-0.0154161	-0.125322
Ccdc125_177.019	0.0803954	-0.0522803	0.0854332	-0.251067	0.104891	-0.291143	0.303564	-0.117468	0.182382	-0.310674	-0.0360645	0.309555	-0.0130074	0.0106811	-0.0270711	-0.0432278	-0.0470105	0.0552279	-0.13164	-0.0402732	0.0901111	-0.0573893	-0.0790323	0.0812855	-0.00939995	0.0785331	0.0511841	-0.0474806	-0.0753136	0.0037658	0.0683399	0.0337653	-0.0471911	-0.0577588	0.012477	0.0579925	0.0200937	-0.0445933	-0.0429991	0.01776	0.0480382	0.00970126	-0.0405626	-0.0308629	0.0204647	0.0388393	0.00209346	-0.0357684
Drosha_24.408	-0.072871	0.294301	-0.415933	-0.151176	0.0069409	0.208089	0.242093	-0.25442	0.103855	-0.0971381	0.0178164	0.147571	-0.220717	0.170654	-0.680266	0.317335	-0.20945	-0.0787179	0.332533	-0.243694	0.249035	0.018568	0.0277436	-0.197411	0.210561	0.08198	-0.144929	-0.181434	-4.65214e-05	0.141189	0.100866	-0.0566149	-0.13624	-0.0438814	0.0804174	0.09279	-0.00449609	-0.0892664	-0.0581972	0.0347445	0.072541	0.0216156	-0.0502721	-0.054764	0.00514925	0.0495348	0.0306648	-0.0222027
Tm2d2_1156.915	0.0284661	-0.0145745	0.000721098	0.0274114	-0.0816595	-0.0494142	0.0255032	0.00105869	0.0216319	-0.043853	0.0537139	-0.023519	0.139491	0.126189	-0.261445	-0.0169743	-0.0134217	0.0763341	-0.0361095	-0.020678	-0.0459375	0.0254025	0.0878678	-0.0546659	-0.000382591	0.00822426	0.0053164	-0.00593271	-0.00942019	0.000939614	0.0108639	0.00543889	-0.00880198	-0.0112664	0.00299219	0.014078	0.00510334	-0.0126026	-0.0131547	0.00602608	0.0179082	0.00405636	-0.017546	-0.0149236	0.01035	0.0223618	0.00195495	-0.0238645
Mmp19_53.218	0.190471	-0.166718	-0.0713109	-0.276008	0.0133385	-0.148135	0.587101	-0.265346	-0.0346467	0.274949	-0.211001	-0.182849	-0.19358	0.0977289	0.0328535	0.375979	-0.168051	-0.318046	-0.260322	0.415689	-0.0103212	-0.154763	-0.00593665	-8.19703e-05	0.00320363	0.0150424	0.00605316	-0.0138877	-0.0162062	0.00574642	0.0225027	0.00796241	-0.0216146	-0.0235242	0.0099964	0.0335456	0.0102499	-0.033573	-0.034067	0.0169936	0.0498047	0.012815	-0.0520963	-0.0492308	0.0283591	0.0735836	0.0153654	-0.0808763
Gm20605 /// Lrch4_71.527	-0.0113258	0.00145172	0.00801746	-0.0790669	-0.0152289	0.0114248	0.15286	0.00157418	-0.140125	-0.0140147	0.093672	-0.040007	-0.040733	-0.250712	-0.0558192	0.329486	0.0352283	-0.0603203	0.202541	-0.411297	0.138348	-0.00705496	-0.0208202	0.0109466	0.0132703	0.0404865	0.0117567	-0.0353978	-0.0343212	0.0148569	0.0435742	0.0120805	-0.0385501	-0.036625	0.0166056	0.0468848	0.0123813	-0.0419758	-0.0390734	0.0185312	0.0504332	0.0126534	-0.0456984	-0.0416745	0.02065	0.0542351	0.0128906	-0.0497436
Zranb3_31.985	0.141506	-0.146816	-0.316458	-0.0620685	-0.0523665	0.0530301	0.459725	0.29777	-0.224821	-0.312698	0.0169236	0.233933	-0.198185	-0.252264	-0.194732	0.0733328	-0.0586527	-0.126688	-0.340601	0.181607	0.438811	0.429262	-0.271665	-0.303411	-0.68647	0.701193	0.708182	-0.393505	-1.59341	-0.177732	0.610788	0.440071	-0.487831	-0.86317	0.0454309	0.493964	0.226575	-0.461475	-0.476097	0.140837	0.372872	0.0752354	-0.379578	-0.249586	0.169661	0.261945	-0.0179154	-0.285726
Pmm1_172.461	-0.0549252	-0.0185464	0.0493463	-0.469224	0.296673	-0.0692735	0.23179	0.414989	-0.0725578	-0.096507	-0.0677346	-0.252559	0.0159193	-0.309269	-0.214742	-0.260209	0.0511293	0.421047	0.169205	-0.084874	0.143953	0.0417563	-0.0578163	-0.197464	0.0644137	0.0987453	-0.000479625	-0.110707	-0.0721797	0.0625626	0.111323	0.0104934	-0.117999	-0.0890237	0.0591159	0.124378	0.0235024	-0.124491	-0.107926	0.053787	0.137772	0.0386908	-0.129867	-0.128995	0.0462562	0.151331	0.0561834	-0.13376
Smurf1_53.319	0.0149604	-0.0767171	-0.0769383	-0.161274	0.144933	-0.091169	0.153442	0.140261	0.126265	-0.274844	0.0589017	0.0427186	0.00834191	-0.0816169	-0.656595	-0.108811	-0.0878114	0.471809	0.277006	-0.363324	0.454476	-0.133685	-0.215542	-0.031815	0.0255337	0.0391044	-0.00205458	-0.0490717	-0.032442	0.0335998	0.0608659	0.00433562	-0.0720278	-0.0564597	0.042679	0.0932396	0.0176546	-0.104669	-0.0963085	0.0515874	0.14044	0.0428618	-0.150545	-0.162378	0.0577071	0.20765	0.0875266	-0.214168
Pacs2_42.452	0.249114	-0.419287	0.0247324	-0.356331	0.130743	0.174729	0.248237	0.253218	-0.220495	-0.444617	-0.0550598	0.150749	-0.0501795	0.264558	-0.869906	0.240411	0.204119	0.117597	0.0475273	-0.311388	0.0944207	0.12154	-0.214635	0.0102827	0.145879	0.0703055	-0.102453	-0.153026	-0.00982935	0.130847	0.107559	-0.053968	-0.158803	-0.0605403	0.101617	0.131119	-0.00244667	-0.145272	-0.104092	0.0612463	0.139388	0.0460139	-0.115073	-0.134885	0.0139835	0.132158	0.086405	-0.0730559
Fam134a_1016.219	0.0794497	-0.0130248	-0.00343406	-0.202541	-0.0970423	0.0620182	0.174719	0.116461	-0.0632275	-0.123878	0.0130443	-0.0320662	0.0249114	-0.103898	-0.118612	0.274352	0.0137954	0.0969507	0.0546625	-0.322283	0.000147571	-0.00693865	-0.00571003	0.0631628	0.0459112	0.106648	0.0225154	-0.0983318	-0.0837444	0.0426	0.103263	0.0236055	-0.093761	-0.0820903	0.0394437	0.0999502	0.0245848	-0.0893678	-0.0804223	0.0364369	0.0967088	0.0254598	-0.0851462	-0.0787441	0.0335746	0.0935391	0.0262362	-0.0810903
AA987161_322.904	0.101432	-0.0568328	0.0765599	-0.215231	-0.049108	-0.190506	0.038879	-0.0363943	0.262381	-0.0207031	0.0759661	0.123028	0.213058	-0.0408643	-0.612534	-0.172501	0.212286	0.0373051	0.01044	0.0794988	-0.150178	0.0625625	0.129373	-0.126773	-0.00279944	0.00975238	0.00903133	-0.00624086	-0.0144353	-0.00109529	0.016228	0.0108527	-0.0129234	-0.0205807	0.00317018	0.0257697	0.0115018	-0.0241156	-0.0279769	0.011896	0.039213	0.00924722	-0.0420983	-0.035805	0.0279254	0.0572056	0.00102641	-0.0699862
Kif3b_534.196	0.0784618	-0.0999731	0.0667435	-0.20111	-0.0607595	0.0559567	0.139155	0.0799271	0.0274848	-0.0778715	0.0231232	0.0942976	-0.0410532	-0.149099	-0.309787	0.154943	0.0450906	0.0019695	0.162966	-0.237125	0.194243	0.0184735	-0.0475305	-0.0480092	0.0187759	0.0710466	0.0251294	-0.0614295	-0.0650135	0.0231189	0.078416	0.0253367	-0.0697484	-0.0703943	0.0281302	0.0864424	0.0252814	-0.0791004	-0.0761097	0.0338926	0.0951705	0.0249056	-0.0896101	-0.0821633	0.0404968	0.104646	0.0241424	-0.101418
Atp13a3_188.771	0.0136948	-0.300707	0.316718	-0.216911	0.0653454	0.130761	-0.0151798	-0.0154999	-0.250453	-0.123359	-0.0246774	0.179188	0.130133	0.0191139	-0.805183	0.422779	0.10409	-0.229325	0.458649	-0.488911	0.19277	-0.0499711	-0.0926525	-0.00464782	0.0422292	0.0255745	-0.0251255	-0.0457081	-0.00778784	0.0399239	0.0375125	-0.0134838	-0.0498654	-0.0227338	0.0332609	0.0473501	0.00111611	-0.0494839	-0.0377123	0.0222183	0.0538453	0.0175677	-0.043941	-0.0511589	0.00718716	0.0559048	0.034454	-0.033103
Cgnl1_220.484	0.131519	0.189036	-0.269988	-0.0777673	-0.0775153	-0.235817	-0.0591735	0.0366567	-0.000203637	-0.105627	0.278173	0.423215	0.0738805	-0.126976	-0.0659304	-0.052663	-0.0361323	-0.260061	0.00687152	-0.100997	0.0633865	-0.0896632	0.139016	0.00196581	0.0544808	0.080627	6.27452e-05	-0.0810477	-0.0511984	0.0422555	0.0732742	0.00712291	-0.0685284	-0.050321	0.0317646	0.0659685	0.0124347	-0.0573515	-0.0485252	0.0228662	0.0588521	0.0162826	-0.0474547	-0.0460574	0.0154127	0.0520335	0.0189157	-0.0387616
Gorasp2_1502.923	0.0086438	0.0151604	0.0335447	-0.224293	0.0805093	-0.0262562	0.0550894	0.131538	0.049943	-0.206913	0.0393406	0.059248	-0.0021454	-0.0208126	-0.165417	0.0212071	-0.0812306	0.120371	0.185173	-0.285844	0.156877	-0.000712011	-0.0290017	-0.0227717	0.0648694	0.0981059	0.00223635	-0.0954154	-0.0610902	0.0470556	0.0827242	0.0090639	-0.0748289	-0.0550414	0.0331635	0.069159	0.0132757	-0.0582247	-0.048823	0.022484	0.0573407	0.0155813	-0.0448999	-0.0427414	0.0144027	0.0471571	0.0165236	-0.0342673
H6pd_3231.637	0.0983964	-0.102622	0.00692065	-0.0230423	0.00545517	-0.0969973	0.0378351	0.0427003	0.0108903	-0.0960056	0.0789004	0.0895548	-0.0439978	-0.0510328	-0.0743396	0.178873	0.024041	-0.0502373	-0.0380802	-0.131649	0.123788	-0.112455	0.0359789	0.0343924	0.025834	0.0318853	-0.00566768	-0.0395442	-0.0214358	0.0271668	0.0417878	1.03667e-05	-0.0468121	-0.0327629	0.0270185	0.0533715	0.00856588	-0.0540358	-0.0473912	0.0246382	0.0665667	0.020745	-0.0605868	-0.0658981	0.019054	0.0811493	0.0373577	-0.0655595
Mcu_850.439	0.0242149	0.0591386	0.0957117	-0.529566	-0.00746684	0.262533	0.0818021	0.0779457	-0.139875	0.132162	-0.0413558	0.0519351	0.0224903	-0.11556	-0.202158	-0.159549	0.0375607	0.0552645	0.205266	0.0413197	-0.0870851	-0.0613498	0.0934402	-0.0857381	0.178323	0.130656	-0.0843509	-0.195837	-0.0508571	0.129429	0.133112	-0.0299563	-0.158013	-0.0774791	0.084366	0.12418	0.00860433	-0.119074	-0.0893035	0.0456798	0.108048	0.03373	-0.0828854	-0.089766	0.0147533	0.088135	0.0479436	-0.0516473
Uggt2_56.975	0.11597	-0.196169	-0.0720019	-0.0712762	-0.0306108	0.151176	0.0748814	0.118151	0.0984935	-0.254971	0.0366743	-0.00924367	-0.0252795	-0.0108937	-0.432295	-0.134876	-0.163772	0.617363	0.150625	0.0384545	-0.25761	0.0303299	-0.122064	0.0241143	0.0440922	0.0261466	-0.0310139	-0.0557867	-0.00803395	0.0556229	0.0531836	-0.022588	-0.0825069	-0.0382304	0.0611916	0.0901401	0.0016864	-0.109933	-0.0884927	0.0529646	0.135135	0.0492569	-0.129148	-0.164702	0.0188764	0.182388	0.126479	-0.124494
Cep70_70.598	0.106579	0.066512	-0.159052	-0.028873	-0.37575	0.0786784	0.0448518	0.148941	-0.0639439	-0.315443	0.00020251	0.157772	0.365143	-0.0413918	-0.175394	0.0486022	0.239315	-0.181934	-0.654602	0.403353	-0.362125	0.258505	-0.0505824	0.0260311	0.0957563	0.174333	0.020869	-0.17495	-0.128998	0.0787087	0.15996	0.0280258	-0.152484	-0.122914	0.0637026	0.146264	0.0335048	-0.132472	-0.116413	0.0505734	0.133282	0.0375598	-0.114675	-0.109661	0.039159	0.121038	0.040411	-0.0988729
Ikbkg_387.26	0.0400624	0.046846	0.111309	-0.275011	-0.101964	0.0666736	0.0607721	-0.0618679	-0.0519485	-0.0181363	0.0465738	0.0797627	0.109745	-0.0426184	-0.12377	0.166177	0.0155752	0.0623074	0.0208228	-0.332722	-0.0973286	0.0738373	0.0462873	0.0524769	0.0472993	0.182482	0.0677317	-0.155672	-0.164413	0.049759	0.170631	0.0577154	-0.148152	-0.148587	0.0515901	0.159339	0.0486609	-0.140756	-0.134121	0.0528689	0.1486	0.0405007	-0.133515	-0.120899	0.0536636	0.138403	0.0331698	-0.126453
Hnf4a_990.701	0.116582	0.0843171	-0.106306	-0.205615	-0.0795675	-0.0370897	0.0327636	-0.0204433	0.027276	-0.281262	0.179523	0.142206	0.112612	0.129376	-0.170894	0.198002	0.0165842	-0.164235	0.0793508	-0.653587	0.162507	0.126237	-0.0210444	0.0687389	0.109193	0.117875	-0.0364023	-0.170384	-0.0784955	0.116467	0.161855	-0.00967927	-0.209421	-0.13616	0.115515	0.212797	0.0329227	-0.247736	-0.216037	0.101526	0.269253	0.0947717	-0.279699	-0.324739	0.0678007	0.328707	0.178432	-0.296762
Mettl7a1_2500.974	0.0841835	0.0174365	-0.062611	-0.0906183	-0.14486	-0.0471348	0.199675	-0.00360111	0.111577	-0.148563	-0.0986269	0.086074	0.0352301	0.142457	-0.118843	0.16149	0.0208688	-0.226055	-0.0444342	-0.20099	0.0631761	0.165864	0.0751785	-0.0927236	0.0163752	0.0373302	0.00713259	-0.0358888	-0.0309814	0.0175297	0.0433224	0.00988811	-0.040746	-0.0371427	0.018615	0.050192	0.0133133	-0.0461843	-0.0444418	0.0195795	0.0580515	0.0175423	-0.0522586	-0.053082	0.020357	0.0670243	0.0227319	-0.0590254
Enox2_213.612	-0.000434031	0.0282462	-0.0316248	-0.0805056	-0.0138137	0.0635377	0.131738	-0.00965881	-0.0636385	-0.126064	-0.104628	0.137129	0.0756808	0.0162967	-0.259884	0.111791	0.212353	-0.113121	0.0653437	-0.0820152	-0.126303	0.0590124	0.0257826	-0.0029193	0.0514739	0.0544914	-0.0157204	-0.0706461	-0.0325269	0.0485047	0.0666836	-0.00349089	-0.0756182	-0.0489857	0.0423818	0.0783367	0.011676	-0.0778245	-0.0670402	0.032627	0.0887725	0.0296398	-0.0764802	-0.0861481	0.0188048	0.0972242	0.0500886	-0.0708239
Cpsf6_150.032	0.0989599	0.0420984	-0.0519134	-0.211349	0.0215282	-0.102545	-0.209088	0.0696053	-0.417263	-0.194918	0.0783903	0.414292	0.748616	0.111903	-0.4205	-0.156968	-0.0837939	-0.0720672	-0.345862	0.0709953	-0.517704	0.396203	0.151041	-0.0935834	0.0954811	0.039766	-0.0742736	-0.102415	-0.000943492	0.0997324	0.079295	-0.0457733	-0.126245	-0.0476465	0.0878737	0.115228	-0.00176812	-0.133554	-0.10107	0.0569238	0.140849	0.0533024	-0.117986	-0.153328	0.0057283	0.14947	0.112286	-0.0766012
Ppp1r18_1127.487	-0.000302241	0.183501	0.00703216	-0.198288	-0.162503	-0.0689505	-0.0306139	0.193764	-0.106838	0.0110447	0.0805169	0.0690137	0.00854211	-0.073671	0.0621262	0.164494	-0.0349619	-0.0854142	0.0330902	-0.419892	0.186908	-0.0607643	0.0434478	0.0538225	0.0334449	0.137034	0.0508558	-0.101151	-0.105	0.0285447	0.102209	0.0342809	-0.0758959	-0.0745749	0.0238737	0.0759047	0.0228179	-0.0569487	-0.0530243	0.0196547	0.0561661	0.0149677	-0.0427154	-0.0377054	0.0159779	0.0414331	0.00964542	-0.0320177
Coro1c_2781.871	-0.0386662	0.0396962	0.039096	-0.164343	0.0594928	0.0136075	0.0319986	0.14251	-0.0323891	-0.0833332	-0.0014333	0.02081	-0.000888422	0.0299332	-0.301998	0.0055264	0.0818105	0.0882023	0.0421126	-0.0786318	0.131219	-0.0433096	0.0030372	-0.0518891	0.00355933	0.0355194	0.0175911	-0.0260592	-0.0335513	0.00641911	0.0368203	0.0155078	-0.0287038	-0.0329465	0.00937276	0.0379527	0.0132205	-0.0312988	-0.0321004	0.0124058	0.0389018	0.0107329	-0.0338247	-0.0310068	0.0155028	0.0396527	0.00805022	-0.0362615
Trnt1_1776.305	0.024576	-0.0549467	-0.0396845	-0.12547	-0.025778	0.086827	0.0944778	0.168531	0.0655456	-0.0997265	-0.00708247	-0.0550704	0.118943	-0.0396991	-0.446938	-0.311255	0.121158	0.174486	0.0257714	0.293534	-0.0463464	0.0810723	-0.0260746	-0.166641	0.0298217	0.0152971	-0.0204071	-0.0324191	-0.00315121	0.0314206	0.0276292	-0.0123897	-0.0398315	-0.017291	0.0283509	0.0398949	0.000705437	-0.0432478	-0.0340634	0.0193146	0.0500528	0.0184818	-0.0405253	-0.0516236	0.00345146	0.055676	0.0396136	-0.0298345
Csk_637.03	0.0448048	0.0772885	-0.100588	-0.0742067	-0.00058663	-0.0471116	-0.0485379	0.00956326	-0.0420057	-0.093242	0.0888728	0.153638	0.0314675	0.0658881	-0.324448	0.317413	0.0451643	-0.0687184	0.044988	-0.454763	0.0761114	-0.00242102	0.150748	-0.0254158	0.0361488	0.019308	-0.0277736	-0.0461599	-0.00444835	0.0493221	0.0454177	-0.0219863	-0.0742939	-0.0335502	0.0575622	0.0845881	0.00144086	-0.105766	-0.0873934	0.0507643	0.135903	0.0539112	-0.129647	-0.176432	0.0114676	0.192583	0.146532	-0.123431
Zfp810_385.49	-0.0847756	0.0690624	0.139589	-0.0180227	0.0491027	-0.204889	-0.134859	-0.0327638	0.00178571	-0.180204	0.200519	0.174344	0.135681	-0.00810646	-0.200069	-0.179926	0.34574	-0.0271662	-0.0906804	-0.0184573	-0.210169	0.0190355	0.0362494	0.0551997	0.0135451	0.0288095	0.0046948	-0.0277159	-0.0230146	0.0138349	0.0326379	0.00692912	-0.0304082	-0.0271594	0.013945	0.0368789	0.00962983	-0.0332553	-0.0319206	0.0138252	0.041563	0.0128699	-0.036245	-0.0373778	0.0134158	0.0467208	0.0167312	-0.039359
Pigl_103.456	-0.183022	0.0927764	0.0837839	-0.102573	-0.0342072	0.169395	-0.0465133	0.0470776	-0.228779	-0.0970818	0.207233	0.207843	-0.099375	-0.0579248	-0.78138	-0.0937482	0.332153	0.0727143	0.264724	0.253683	-0.396804	0.176248	-0.281433	0.0451368	-0.0323083	0.0977673	0.0782051	-0.0489081	-0.0991898	-0.00685061	0.0790664	0.0471283	-0.0480078	-0.0682884	0.00739553	0.0614891	0.0255688	-0.0429129	-0.0453006	0.0143591	0.0461366	0.0113376	-0.0360554	-0.0286927	0.0167683	0.0334272	0.00249654	-0.0289152
Tm7sf3_427.248	0.0291722	-0.0277537	-0.0374815	-0.0144967	-0.165268	0.136275	-0.0221152	0.130568	0.104098	-0.0858611	-0.0426188	0.148729	-0.085484	0.00164034	-0.452408	0.0440096	0.115947	-0.0239269	0.152789	-0.0181268	0.102611	0.0132682	-0.103911	-0.0260998	-0.0131178	0.0129719	0.0199049	-0.00328575	-0.0224797	-0.00792564	0.0188531	0.0176337	-0.0106101	-0.0238185	-0.00106274	0.0236011	0.0130731	-0.0179778	-0.0227441	0.00696992	0.0265329	0.00633679	-0.0245781	-0.018995	0.015472	0.0270518	-0.00220945	-0.0295448
Seh1l_1036.23	0.000823746	-0.0559811	0.0769423	-0.105139	-0.0238197	0.0996656	-0.0154026	0.069415	0.0251587	-0.067208	0.0161619	0.0269753	0.0755904	-0.0342619	-0.380465	0.00752803	0.0569917	0.114612	0.0680793	-0.00137757	-0.074061	0.138568	-0.00716955	-0.0937965	0.0104437	0.0133208	-0.00231823	-0.0171531	-0.00975899	0.0124636	0.0201216	0.000343021	-0.0232067	-0.0172188	0.0139372	0.029526	0.00557433	-0.0305216	-0.0286344	0.0140205	0.0421723	0.0148295	-0.0388373	-0.0456689	0.0113084	0.058664	0.0301368	-0.0474091
Tm7sf3_577.525	0.0424796	-0.00436812	-0.0186304	-0.0550535	-0.087434	-0.0820447	0.17216	0.044683	-0.00515717	-0.0795583	0.050299	0.186843	-0.00308903	-0.0572389	-0.185043	0.00364918	-0.0726284	-0.0357196	0.0392865	-0.0333051	0.0890159	0.069928	0.11744	-0.164398	-0.0127852	0.0638123	0.0466652	-0.0363658	-0.0657742	-0.000957442	0.059008	0.0332007	-0.0392136	-0.0537112	0.00792205	0.0531351	0.0216988	-0.039822	-0.0425912	0.014268	0.0466708	0.0121384	-0.0387183	-0.0326121	0.0184805	0.0399998	0.00442728	-0.0363709
Tmsb10_36300.102	-0.0321161	0.114292	-0.0345728	0.0368721	0.00829616	-0.0906693	-0.0888424	-0.0680066	-0.0557967	-0.0725091	0.0496833	0.0927638	-0.0381691	0.0173486	0.232289	0.240973	-0.0215272	-0.127048	-0.0876557	-0.215482	-0.0564938	-0.0968124	0.0733423	0.12335	0.00110871	0.00209309	0.000158873	-0.00240707	-0.00190581	0.00153374	0.00337913	0.00056532	-0.00366915	-0.0032944	0.00205969	0.00541454	0.00138624	-0.0055444	-0.00562101	0.00265354	0.00861131	0.00295747	-0.00829851	-0.00948588	0.00320847	0.0135913	0.0058556	-0.0122892
Ppapdc2_280.809	0.10598	-0.0426229	0.184743	-0.37415	-0.0399556	0.0373863	-0.0223996	-0.239886	0.0894008	0.00161471	0.00264135	0.295884	0.223897	-0.0214669	-0.394683	0.192002	-0.00950351	-0.0617894	0.00179167	-0.260581	0.0199613	0.0427802	-0.0452022	0.0882021	0.080005	0.0685374	-0.0283079	-0.0855173	-0.0305138	0.0545805	0.0635876	-0.00717441	-0.0657333	-0.0371336	0.0337141	0.0553806	0.00675108	-0.0478614	-0.0383445	0.0174997	0.0457072	0.0150448	-0.0326636	-0.0359891	0.00562391	0.0358419	0.0191202	-0.0203876
Irf2bpl_1519.568	0.0830317	-0.0849089	-0.0511585	-0.214214	0.0623668	-0.00364439	0.139034	0.188391	0.0838357	-0.184252	0.0634136	0.00911466	-0.101504	-0.1059	-0.409036	0.146417	-0.0019165	0.151746	0.179566	-0.337832	0.320284	-0.0266614	-0.0321344	-0.0979058	0.012724	0.0654243	0.0279496	-0.0564041	-0.0672277	0.0188958	0.0813893	0.0316441	-0.0731076	-0.0821656	0.0272646	0.100963	0.0354085	-0.0946713	-0.100308	0.0384945	0.124859	0.0390509	-0.122562	-0.122328	0.0534182	0.153889	0.0422819	-0.158751
Zfp2_112.894	0.0120528	0.0816897	-0.0763978	-0.0528235	-0.0472728	0.0167568	0.0023107	0.0151233	0.0249685	0.0312417	0.0353138	-0.07932	0.0324604	0.0258072	0.0155221	-0.0468763	-0.0163874	-0.0382332	-0.0446172	0.208433	-0.128664	-0.0484109	0.0206191	0.0220583	0.0366965	0.0310638	-0.0136447	-0.0395137	-0.0139659	0.0270375	0.0314992	-0.00395168	-0.0331699	-0.0188811	0.0180031	0.0298333	0.00355174	-0.0262771	-0.0213731	0.0100169	0.0266873	0.00894676	-0.0194228	-0.0218731	0.00333644	0.0226205	0.0124246	-0.0130406
2010012O05Rik_145.288	0.0277282	0.14538	-0.0341636	-0.196658	-0.0959473	-0.136637	-0.14727	0.0355219	0.101797	-0.113243	0.00257269	0.0407618	0.539998	0.049691	-0.660656	0.229278	-0.0316408	-0.0565762	0.167218	-0.0482973	-0.538099	-0.119176	0.417522	-0.0657149	0.00486268	0.00705859	-0.000496701	-0.00842202	-0.0054276	0.00567583	0.0101736	0.000807661	-0.0110729	-0.00880278	0.00627404	0.0143835	0.00314613	-0.0142593	-0.0137533	0.00636515	0.0199656	0.00705233	-0.0179292	-0.0208798	0.00547843	0.0272164	0.0132708	-0.0219011
Rtkn_178.336	0.0528122	0.0764104	0.146395	-0.400191	-0.00790388	0.0295189	-0.0768806	-0.0773467	-0.243476	0.0712984	0.294971	0.0931162	0.0625445	0.00213924	-0.244091	0.308219	0.0695349	-0.0565172	-0.222048	-0.00077198	-0.198043	-0.0602782	-0.0804212	0.227827	0.152236	0.0695102	-0.10166	-0.14531	-0.00912871	0.117684	0.0948157	-0.0437887	-0.128691	-0.0503967	0.0768925	0.100379	0.00201789	-0.0990559	-0.0736041	0.0366745	0.0912613	0.0336306	-0.0646892	-0.0801743	0.00223293	0.072693	0.0513982	-0.031876
Ap1m1_855.114	0.0714879	-0.023297	0.242622	-0.258394	-0.184719	0.0183832	-0.117485	0.0129885	-0.166177	0.229457	0.0113125	-0.0535624	0.0142992	-0.0196481	0.270147	0.26638	-0.0552317	-0.108905	-0.151008	-0.154537	-0.146351	-0.167068	0.0842871	0.18813	0.00685542	0.0197768	0.00547	-0.0182906	-0.0179494	0.00819496	0.0246309	0.00720624	-0.0225979	-0.0226897	0.00977527	0.0306563	0.00946173	-0.0279192	-0.0286832	0.0116331	0.0381272	0.0123848	-0.0344958	-0.0362658	0.0138083	0.0473775	0.0161642	-0.0426284
Tmem65_822.673	0.159503	0.0015442	-0.0764731	-0.206222	-0.141536	-0.0173722	0.098993	0.0975363	-0.0350875	0.118879	0.0868731	0.0835333	0.055501	-0.136619	-0.157648	0.032699	-0.0836297	0.0228465	0.00359294	0.0161567	-0.0665526	0.062411	0.0417904	-0.0327377	0.0522276	0.0575648	-0.0113554	-0.0645703	-0.0316317	0.0384803	0.0545281	2.57683e-05	-0.0535999	-0.0354528	0.0263003	0.0499478	0.00863903	-0.0430069	-0.0368563	0.0158412	0.0443706	0.0148078	-0.033156	-0.0363526	0.00715034	0.0382563	0.0188724	-0.0242867
Hhex_5020.998	0.129725	-0.0468141	0.00881291	-0.168775	-0.0986816	-0.0878798	0.0853124	0.0764041	0.0708297	0.0104016	0.121871	0.053069	0.0407393	-0.166398	-0.222343	0.0141707	0.157992	0.0323916	-0.0370336	-0.0623366	-0.0340841	0.0500767	-0.0161332	0.0149894	0.0136598	0.0181908	-0.00207491	-0.0215609	-0.0128532	0.0142408	0.0238099	0.0012978	-0.025463	-0.0192985	0.013942	0.0304158	0.00634835	-0.0293057	-0.0276013	0.0123176	0.0379801	0.0135335	-0.032727	-0.0380739	0.00878977	0.0463827	0.0233647	-0.0352046
Adamts1_146.398	-0.228572	0.105617	-0.294141	0.2109	0.00552193	0.254241	-0.182035	-0.104701	0.0547495	-0.154305	0.204894	0.123642	-0.114869	-0.03184	-0.693465	-0.357015	-0.8242	0.542017	0.667532	0.217693	0.287306	-0.0396836	-0.509504	-0.0865555	-0.00298518	0.00349628	0.00459939	-0.00105391	-0.00494983	-0.00145955	0.00400142	0.00339584	-0.00214341	-0.00433485	-0.00010958	0.00408771	0.00214837	-0.00285195	-0.00348804	0.000989859	0.00382845	0.000965762	-0.00319494	-0.00252239	0.0017985	0.00331054	-6.90261e-05	-0.0032145
Stk17b_651.996	-0.163756	0.214543	-0.0101479	0.0563115	-0.168025	0.0390555	-0.127481	0.112421	-0.101395	0.0840677	0.149946	0.0779313	0.0293598	-0.152927	-0.352384	-0.105776	0.107372	0.155031	0.0120002	0.132765	-0.0205514	-0.00809169	-0.0954106	-0.00182475	0.00277695	0.024335	0.0122029	-0.0194775	-0.0257783	0.00532834	0.0310943	0.0136746	-0.0262359	-0.0316783	0.00901793	0.0395593	0.0149955	-0.035132	-0.0387498	0.0142486	0.0501066	0.0159736	-0.046809	-0.0471657	0.0215445	0.0631769	0.0163263	-0.0621045
Nubp1_864.35	-0.0641692	-0.0159601	0.120489	-0.226673	0.127936	0.0425713	0.0514197	0.137298	0.122398	-0.11591	-0.167933	-0.237956	0.0131322	0.00762826	-0.123395	0.12288	-0.0367499	0.196621	0.10555	0.00698567	-0.126137	-0.0610301	0.0310647	-0.0218541	-0.0402873	0.0392567	0.063116	-0.00998455	-0.0782125	-0.029234	0.0669474	0.0661641	-0.0404212	-0.0985947	-0.00611672	0.0981444	0.0586961	-0.082576	-0.112136	0.0313643	0.129237	0.0355245	-0.135991	-0.111729	0.0838549	0.154795	-0.00934521	-0.197407
Gna12_317.563	0.111916	-0.206695	-0.0945608	-0.144559	0.2445	0.0274002	0.0529899	0.209081	0.0695731	-0.20786	-0.0926525	-0.00216361	0.0345486	-0.131353	-0.44056	0.166281	-0.167938	0.309751	0.206186	-0.137613	0.0905349	0.00790706	-0.0499292	-0.0921431	0.00304589	0.0160389	0.00667637	-0.0121617	-0.0140891	0.0036532	0.0161624	0.00614452	-0.0126135	-0.0138222	0.00425995	0.0162641	0.00559948	-0.013051	-0.0135333	0.00486526	0.0163436	0.00504191	-0.0134736	-0.0132229	0.00546828	0.0164006	0.00447248	-0.0138804
Phgdh_2605.892	-0.705773	-0.153176	0.0458403	-0.367114	0.626912	0.5581	0.0917534	0.431494	0.169179	-0.35911	-0.69402	-0.771696	-0.54913	-0.657857	-0.907533	-0.857319	0.542164	1.05302	0.582869	0.411014	0.140195	-0.229662	-0.383211	-0.602118	-0.00722377	0.0551181	0.0418525	-0.0394145	-0.0744377	0.000658021	0.0816009	0.0494387	-0.0676609	-0.101615	0.0163614	0.118042	0.0547986	-0.111927	-0.136031	0.0443943	0.166883	0.0546193	-0.180763	-0.177966	0.090921	0.230461	0.043229	-0.288029
Ugcg_1912.775	0.0804015	-0.0889151	-0.00232166	-0.0952545	0.111137	-0.00756431	0.0312777	-0.0669073	-0.0531509	-0.14487	-0.0411495	0.216525	0.0846966	-0.0139171	-0.222882	0.183059	0.151817	-0.0148176	-0.0123192	-0.360496	0.0378279	0.0634769	0.00573818	0.035239	0.078363	0.0345238	-0.0580334	-0.083082	-0.00344305	0.0793819	0.0655749	-0.033374	-0.0990282	-0.0405941	0.0671765	0.0922781	0.00235916	-0.101104	-0.0806538	0.0403295	0.109452	0.0450712	-0.0855715	-0.117065	-0.000756964	0.112306	0.088872	-0.0515074
Calm1 /// Calm2 /// Calm3_1230.175	0.0194031	0.29571	0.0158899	-0.660565	-0.0416763	0.18182	0.00529159	-0.0534533	-0.00942576	-0.550187	0.140414	0.313629	0.161886	0.119008	0.048141	0.145629	0.078449	-0.242728	-0.160923	-0.282427	-0.407825	0.197331	0.16451	0.0523672	0.302977	0.294514	-0.0754299	-0.357146	-0.145082	0.16508	0.208259	-0.00385422	-0.201075	-0.119579	0.080797	0.140092	0.023531	-0.11091	-0.0894149	0.0334111	0.0900666	0.0301307	-0.0589095	-0.0627977	0.00909182	0.0554681	0.0277231	-0.0294731
Gna13_1289.305	0.111187	0.0477538	-0.182006	-0.126861	-0.150641	0.0263208	0.105319	0.0907164	0.0974192	-0.160632	0.153463	0.153271	0.0235095	-0.0958671	-0.517237	0.0819035	0.0960002	0.0108182	0.198936	-0.312529	0.18452	0.047051	-0.0930182	-0.00810311	0.0649403	0.066578	-0.0209579	-0.0885216	-0.0399212	0.0602604	0.0824335	-0.0038386	-0.0942099	-0.0621943	0.0509041	0.097003	0.0172325	-0.0953971	-0.0862695	0.0362468	0.109203	0.0417997	-0.0909482	-0.111095	0.0157788	0.11785	0.0691174	-0.0798748
Kif2a_400.71	0.0207746	-0.0526976	-0.0375182	-0.137134	0.0114057	0.111799	0.0701449	0.190269	0.0176214	-0.220265	0.143064	-0.0398264	0.00123442	-0.056766	-0.511355	0.0428222	0.0562163	0.0571084	0.146793	0.0139002	0.244177	-0.081434	-0.0812565	-0.0815354	0.0447516	0.0547197	-0.00694224	-0.060227	-0.0331513	0.0350925	0.0546877	0.00272621	-0.0534647	-0.0383302	0.0255747	0.0531566	0.011093	-0.0460312	-0.041806	0.0164454	0.050347	0.0180974	-0.038228	-0.0436779	0.00791498	0.0464857	0.023723	-0.0303272
R3hdm1_61.719	0.105015	-0.111861	0.0653128	-1.11262	0.45905	0.280417	0.519563	-0.11675	-0.296595	-0.0984967	-0.345013	0.0737857	-0.115978	-0.304668	-0.0569818	-0.130487	0.139641	0.710184	0.190418	-0.872818	-0.147983	-0.0944381	0.1879	-0.0783107	0.228564	0.0975962	-0.195675	-0.276338	-0.00438884	0.241811	0.198136	-0.116156	-0.353238	-0.135005	0.213918	0.28791	0.00687654	-0.377963	-0.298565	0.133457	0.350204	0.155766	-0.324475	-0.473639	-0.0104649	0.3686	0.307283	-0.186743
Marveld1_183.244	-0.0939222	0.0451631	0.134445	-0.234248	0.125653	0.0974773	0.0600227	0.0390868	-0.237586	-0.214902	-0.0374868	0.0849571	0.115059	-0.0884199	-0.134419	0.293156	0.0644836	0.0572146	0.0199069	-0.353786	0.15149	-0.204308	0.0691938	0.0530997	0.0607843	0.118089	0.0176414	-0.113143	-0.0893226	0.0501927	0.112561	0.024473	-0.10209	-0.0895726	0.0403433	0.106776	0.0303079	-0.0915247	-0.0890561	0.0312374	0.100804	0.0352209	-0.0814755	-0.0878652	0.0228703	0.0947099	0.0392843	-0.0719618
Zfp36l1_1871.283	0.0414476	-0.073737	-0.0951256	-0.210444	0.028963	0.00553175	0.0965203	0.20337	-0.000814322	-0.0462253	0.221013	0.139244	-0.0278044	-0.289246	-0.824763	-0.0743878	-0.0897117	0.0889062	0.365567	-0.162657	0.567726	0.0304506	-0.115807	-0.293792	0.0784443	0.042369	-0.0525961	-0.0875047	-0.0110615	0.0785682	0.0718576	-0.0284713	-0.102673	-0.0473586	0.0667468	0.0980847	0.00625208	-0.105611	-0.0875029	0.0411318	0.116476	0.0486159	-0.0923438	-0.126104	0.00113725	0.122421	0.0939353	-0.0608849
Pias3_168.394	0.101492	0.0120501	-0.0435298	-0.149314	-0.0803659	-0.0661438	-0.00575671	0.157015	-0.0638121	-0.048898	0.0476669	0.194331	0.134066	-0.0350753	-0.306566	0.1113	-0.095409	-0.0316498	0.148606	-0.349546	0.272964	-0.10934	0.047456	-0.00712579	0.016757	0.0588157	0.0201069	-0.0487459	-0.0510206	0.0171056	0.0599216	0.0204611	-0.0497168	-0.0519989	0.0174614	0.0610478	0.0208216	-0.0507073	-0.0529963	0.0178244	0.0621948	0.0211882	-0.0517179	-0.0540131	0.0181949	0.0633628	0.0215613	-0.0527491
Mnd1_30.929	0.166825	-0.0250693	-0.00458675	-1.02565	-0.0960027	-0.0308074	0.508435	0.786987	-0.0259647	-0.591135	-0.213303	-0.101438	0.0705708	-0.394215	-0.464829	0.239543	0.00127444	0.571003	-0.767201	0.488785	-0.147829	-0.0817616	-0.396982	0.141546	-0.0745327	0.30829	0.233078	-0.19326	-0.376749	-0.0121627	0.272456	0.163682	-0.196182	-0.285906	0.0289986	0.23526	0.107016	-0.187802	-0.212821	0.0547074	0.198679	0.0622741	-0.172347	-0.154643	0.069162	0.164128	0.0282306	-0.153074
Gng10_2274.462	-0.00818193	-0.0366416	0.038596	-0.0733704	0.00630398	-0.0457027	0.0402421	0.175435	0.0432202	-0.00729713	-0.0444614	-0.123331	0.0836002	0.000404473	-0.282692	0.00751534	-0.109933	0.189951	-0.068957	0.190768	-0.0389857	0.127743	-0.0603168	-0.0968307	-0.00646137	0.0139464	0.0148223	-0.00692855	-0.0202665	-0.00377087	0.019691	0.0151597	-0.0131163	-0.0241484	0.000786635	0.026309	0.0139842	-0.02121	-0.0274029	0.00769073	0.0335316	0.010605	-0.0313464	-0.029314	0.0174052	0.0408855	0.00419198	-0.0435046
Snx19_92.383	-0.00162287	-0.00884076	-0.0384291	0.00723258	0.0140032	0.01463	-0.0123002	0.0148991	0.0128441	0.00958722	0.00532202	0.185312	-0.081402	-0.170349	-0.148904	0.0328489	-0.0306126	0.103024	0.0587549	-0.120319	0.117592	0.125756	-0.0929092	-0.0538745	0.0120812	0.00948373	-0.00628892	-0.0155249	-0.00481827	0.0135143	0.0156891	-0.00310118	-0.0201459	-0.0119062	0.0132226	0.0232385	0.00308768	-0.0240191	-0.0218612	0.00997806	0.0315726	0.0131912	-0.025763	-0.0347829	0.00222406	0.0395735	0.0279633	-0.0234156
Atp11c_101.284	0.267192	-0.0189529	-0.233683	-0.780333	-0.0212521	0.385386	-0.276728	0.342783	0.0587264	-0.0550466	0.051277	0.615063	0.0530082	-0.376043	-1.15177	-0.123476	0.0998001	0.0750801	0.0332469	0.207763	0.284148	-0.169537	-0.129352	-0.121242	0.023574	0.0658656	0.0184658	-0.0535089	-0.050528	0.0193611	0.0577718	0.0173784	-0.0459173	-0.0448254	0.0158195	0.0506299	0.0162657	-0.0393866	-0.0397441	0.0128504	0.0443351	0.0151515	-0.0337681	-0.0352193	0.0103687	0.038793	0.0140541	-0.0289349
4930430F08Rik_214.913	0.0387848	0.155166	0.0664167	-0.564307	-0.121031	-0.0114276	0.127684	-0.00158708	0.170687	0.164044	0.0166179	0.0674056	0.188478	-0.0268569	-0.801553	-0.0686345	0.0925185	0.128481	-0.124836	0.129397	0.0339769	0.175533	-0.138222	-0.0789585	0.0463787	0.0801227	0.00611671	-0.083943	-0.0622598	0.0433443	0.0899261	0.0162495	-0.0881647	-0.0761892	0.0387286	0.0998743	0.0281113	-0.0913416	-0.091578	0.0322777	0.109797	0.0417886	-0.0931715	-0.108421	0.0237146	0.11949	0.0573436	-0.0933199
2310035C23Rik_159.335	0.0428419	0.00384644	-0.220849	-0.0384952	-0.0953906	-0.00103559	0.126363	0.208511	-0.143867	-0.149439	0.0737648	0.212987	0.362471	0.0360689	-0.907743	-0.393969	-0.0136948	-0.00742992	0.146911	0.192723	0.304771	0.215795	-0.306188	-0.169708	0.0603044	0.0577508	-0.0223727	-0.0803032	-0.0335407	0.057106	0.0750793	-0.00557124	-0.0877903	-0.0568937	0.0484849	0.091465	0.0163261	-0.0903129	-0.0829878	0.0334243	0.10544	0.0429176	-0.086178	-0.110541	0.0110293	0.115325	0.0733363	-0.0738273
Gstm1_5769.86	0.231663	-0.205463	0.109518	-0.0831072	-0.100038	-0.0877928	-0.164044	-0.252055	-0.109624	0.00557488	0.0217303	0.157917	0.0755219	-0.049395	0.565908	0.413302	0.0844991	-0.392786	-0.448924	-0.39746	-0.231689	0.0275572	0.102528	0.23567	0.00407613	0.00436983	-0.0015709	-0.00653719	-0.0031388	0.00547928	0.0080233	-0.000442664	-0.0101379	-0.00728785	0.00662292	0.0138813	0.00272272	-0.0148917	-0.0148301	0.0065567	0.0227956	0.00974949	-0.0204588	-0.0278316	0.00333988	0.0355811	0.0235861	-0.0255505
Rad23b_8280.506	-0.0504925	-0.00153172	0.0318775	-0.135467	-0.0563966	-0.031109	0.165294	0.146531	0.118124	-0.0498387	-0.0194683	-0.0241772	0.0247259	-0.116229	-0.572525	0.0589399	-0.0945693	0.0522745	0.296057	-0.184078	0.407617	0.0528691	-0.0617011	-0.225424	0.00417533	0.0773727	0.0441132	-0.0610482	-0.0892334	0.0120568	0.0994027	0.049748	-0.0843958	-0.1109	0.0238162	0.126847	0.0548835	-0.11592	-0.137218	0.0408393	0.160736	0.0588071	-0.158518	-0.168991	0.0648787	0.202176	0.0604601	-0.216285
Dab2ip_1038.588	0.07284	-0.0125436	0.0682411	0.0173684	-0.147783	-0.0454461	-0.201471	-0.108357	-0.0941084	0.103292	0.0717868	0.130068	-0.11422	0.0832395	0.425268	0.143327	-0.0864881	-0.200611	-0.0786708	-0.339268	-0.0156813	-0.110257	0.0649423	0.175537	-0.000548895	0.00201494	0.00165392	-0.00106719	-0.00221865	-0.000177618	0.00207966	0.00132521	-0.00131312	-0.00203083	0.000167695	0.0020863	0.000989691	-0.00150559	-0.00180679	0.00048041	0.00203943	0.000656432	-0.00164405	-0.00155521	0.000755271	0.00194463	0.000333711	-0.00172941
Arcn1_2724.154	0.0695852	-0.0278082	0.0152297	-0.0984833	-0.0289723	9.71095e-05	-0.0106365	0.0115845	-0.0201265	-0.00161808	0.0010969	0.108769	-0.0616764	-0.014453	-0.0908036	0.307636	-0.0205287	-0.0817746	-0.0317286	-0.210268	0.0874795	-0.0199408	-0.0193368	0.0653402	-0.000247762	0.0112758	0.00696655	-0.00758618	-0.011772	0.0008637	0.0125927	0.00660671	-0.00918459	-0.012347	0.00216827	0.0139464	0.0060693	-0.0109315	-0.0128233	0.00368006	0.0153214	0.00532975	-0.0128258	-0.0131745	0.00541233	0.0166989	0.00436217	-0.0148638
Phkg2_200.251	0.0862668	-0.151537	0.0572002	0.0301866	0.0289148	-0.153593	0.031611	-0.00344814	0.00153708	-0.064928	0.121467	0.0255628	0.0923311	-0.0313406	-0.120707	-0.00205802	0.0255156	0.11892	-0.208874	-0.062246	0.023245	0.115863	0.0446861	-0.0683666	-0.00421196	0.011339	0.0115504	-0.00639322	-0.017331	-0.00275505	0.018264	0.0139673	-0.0131245	-0.0242034	0.00101553	0.0281909	0.015525	-0.0240499	-0.0325538	0.0086847	0.0418988	0.0148796	-0.0411239	-0.041878	0.0225576	0.0600665	0.00973933	-0.0669862
Sec62_9230.644	-6.25134e-05	-0.0183352	-0.133764	-0.00320001	0.094085	-0.0130034	0.124571	0.106024	0.0824772	-0.178391	0.0191475	-0.0458879	0.0225	-0.0222899	-0.255213	-0.237907	0.101935	0.107474	0.0777292	0.12754	0.0493712	0.0931234	-0.0854701	-0.111736	0.0110345	0.010618	-0.00397371	-0.0142254	-0.00610554	0.0105038	0.014038	-0.000895786	-0.0156546	-0.010408	0.00890104	0.0173531	0.00324345	-0.0161937	-0.0152193	0.00601354	0.0202488	0.00842455	-0.0155075	-0.0202897	0.00166681	0.0223465	0.0145325	-0.0132614
Pmp22_177.139	-0.341141	0.432667	-0.261612	0.228857	-0.0777969	0.268256	-0.158586	0.0459649	-0.257419	-0.265167	0.0260584	0.00280211	0.270689	-0.148874	-0.132919	-0.0719832	0.307736	0.0650802	-0.169675	0.0692099	-0.14488	-0.0297082	0.0428493	-0.0323206	0.0407136	0.0332563	-0.0174332	-0.0471794	-0.0161366	0.0347723	0.0409936	-0.00546039	-0.046586	-0.0278707	0.026036	0.0460444	0.00728183	-0.0425029	-0.0380937	0.0149905	0.0479624	0.0198846	-0.0351191	-0.0459517	0.00231244	0.0464952	0.031437	-0.0248907
Vps37b_568.051	-0.066132	0.129476	0.0598613	-0.124445	-0.0336841	-0.0395975	-0.0391118	0.0792472	0.110044	-0.123329	-0.0377979	-0.00557594	-0.0367291	0.00484451	-0.02624	0.176117	0.0755186	0.10014	-0.0917568	-0.164895	-0.136344	0.0483947	0.0217438	0.0549913	-0.00783699	0.0677587	0.0445669	-0.0389474	-0.0638124	0.000754563	0.0562625	0.0305206	-0.0358408	-0.048406	0.00612444	0.0460671	0.0199889	-0.0320033	-0.0362137	0.00919539	0.0372192	0.0122533	-0.0279087	-0.0266656	0.0106606	0.0296822	0.00670394	-0.0238683
Fam120a_666.692	0.0439902	0.027258	-0.264417	-0.0600406	-0.00741977	-0.0525081	0.131487	0.307311	-0.075669	-0.0901039	0.0774548	0.0466213	0.120987	-0.0104405	-0.652531	-0.304115	-0.0624928	0.163918	0.258581	-0.212686	0.427926	0.119289	-0.0308253	-0.293367	0.0748648	0.061987	-0.0353371	-0.0968383	-0.0328423	0.0739369	0.0884266	-0.013177	-0.111375	-0.0673713	0.0640286	0.114418	0.0186345	-0.117923	-0.108342	0.0425822	0.136972	0.0596069	-0.11243	-0.153448	0.00709842	0.152454	0.108021	-0.0910383
Stk38_2549.036	-0.0216435	-0.0269291	0.142498	-0.0158358	-0.0608959	-0.0261566	-0.0489311	-0.0111911	-0.0591563	0.110171	-0.0750562	0.0300725	-0.10094	-0.0345028	0.12822	0.229653	0.0364821	-0.0708941	-0.179443	0.0267774	-0.0686327	-0.0702789	0.0318189	0.0694087	0.00255467	0.00576336	0.00103678	-0.00608075	-0.00548155	0.00330279	0.00872712	0.00224011	-0.00875515	-0.00877913	0.00413241	0.0131369	0.00436939	-0.0125156	-0.0139457	0.00493085	0.0196546	0.00802936	-0.0177514	-0.0219997	0.00545255	0.0292169	0.014179	-0.0249587
Syde1_565.655	0.0299886	-0.173601	0.0913095	-0.13638	0.120466	-0.0152682	0.149427	0.11957	0.0653069	-0.0725856	-0.115859	-0.154267	0.0917924	-0.0292623	-0.219206	-0.150411	0.0141185	0.127031	0.183588	-0.00421427	0.0251413	0.133569	-0.0659319	-0.126188	0.00190673	0.0137897	0.00664817	-0.0109255	-0.0141923	0.00293971	0.017133	0.00764837	-0.0139977	-0.0172413	0.00435005	0.021254	0.00873718	-0.0178974	-0.0209151	0.00625564	0.0263243	0.00989882	-0.0228422	-0.0253343	0.00880771	0.0325501	0.011105	-0.0291066
Slc25a10_702.137	-0.0283287	0.0929647	0.0703439	-0.178754	-0.0734103	0.0142336	0.085607	0.0261536	-0.0884051	-0.138246	0.0372872	-0.0250786	-0.0585436	0.0748126	-0.0150061	0.382444	0.0655772	-0.104895	0.0131941	-0.436454	-0.0741562	0.0965631	0.0455761	0.055474	-0.0126029	0.118439	0.0802705	-0.0752933	-0.127783	0.00189016	0.11558	0.0652019	-0.0816317	-0.114692	0.0145279	0.111422	0.0508341	-0.0860113	-0.101507	0.0253748	0.106168	0.0373011	-0.0885843	-0.0884471	0.0345099	0.100011	0.0247125	-0.0895176
Ahdc1_249.96	0.0327424	-0.0858379	0.098485	-0.0770113	-0.0813269	0.208929	-0.196048	-0.129042	0.101752	-0.119532	-0.0340006	0.187946	0.0472468	-0.110347	-0.0681781	0.423129	-0.187392	-0.263305	0.118193	-0.310281	0.273885	-0.131902	0.0730839	-0.0186939	0.00398915	0.0169714	0.00676503	-0.0160384	-0.0191184	0.00629432	0.026896	0.0107964	-0.0255524	-0.0305638	0.00992643	0.0425391	0.0172154	-0.0407904	-0.0489781	0.0156422	0.0670711	0.0274141	-0.065323	-0.0787936	0.0246199	0.105243	0.0435629	-0.105157
Imp4_76.097	-0.0491404	-0.158659	-0.0418502	-0.197429	0.326424	0.11821	-0.0412288	0.553547	-0.433169	-0.158968	-0.221151	0.0724141	-0.0225064	-0.0805623	-0.759661	0.177221	0.0593356	0.514073	-0.203182	0.00462143	0.293813	-0.13179	-0.13244	-0.111934	-0.0184972	0.0176551	0.0287177	-0.00383017	-0.0334682	-0.0133082	0.0282231	0.0288459	-0.0153422	-0.0397618	-0.00421745	0.0392731	0.025165	-0.0296495	-0.0432269	0.0090871	0.0495466	0.0165659	-0.0459982	-0.0421992	0.0264582	0.0574015	0.00209091	-0.0630007
Htatsf1_52.06	-0.0632256	0.153291	-0.105384	0.0632619	-0.0572448	-0.0803152	-0.00653374	0.0518805	-0.109167	0.110491	-0.00579435	0.114676	0.142796	-0.0471155	-0.20558	-0.113003	0.0236225	0.0157927	-0.0477964	0.0412729	0.024578	0.0668205	0.0880625	-0.125539	0.00335814	0.0137433	0.00526234	-0.0118481	-0.0135498	0.00423598	0.0175237	0.00677051	-0.0151079	-0.0173605	0.00534203	0.0223358	0.00870898	-0.0192702	-0.0222508	0.00673514	0.028456	0.0111995	-0.0245886	-0.028532	0.0084891	0.036232	0.0143976	-0.0313904
Nkrf_392.17	-0.147442	-0.0655309	-0.0222536	0.0276855	0.184816	0.00440493	0.110959	0.0576474	-0.0185461	0.000166358	-0.150066	-0.130942	0.0870423	0.129518	-0.888668	-0.31	0.145499	0.325348	0.251023	0.354984	0.016313	-0.115108	-0.193148	-0.0971087	0.00174466	0.00469862	0.00121155	-0.00450002	-0.00441347	0.00209029	0.00637505	0.00195812	-0.00589933	-0.00620665	0.00245543	0.00862743	0.00307449	-0.00770741	-0.0086989	0.00280948	0.0116449	0.00472464	-0.010033	-0.0121547	0.00309782	0.0156749	0.00713983	-0.0130092
Tlk1_212.059	0.118248	-0.000205084	-0.180863	-0.242572	0.208547	-0.0629954	-0.0595981	0.215649	0.0972902	-0.185658	0.074356	0.0615458	0.13008	-0.101243	-0.264059	-0.0585174	-0.0836605	0.164134	0.0335515	-0.259801	0.175606	0.16215	0.0237693	-0.150707	-0.00321439	0.030225	0.0226714	-0.0217932	-0.0409426	0.000211365	0.0468113	0.0291706	-0.0380162	-0.0592702	0.00781141	0.071352	0.0360241	-0.0646182	-0.0847863	0.0226686	0.106988	0.0418914	-0.107923	-0.11974	0.0495955	0.157638	0.0440479	-0.178448
Naa50_1121.282	-0.147244	0.0315347	0.0371833	-0.193751	0.323613	0.0246767	0.149751	0.0933693	0.0449124	-0.353966	-0.112781	-0.119286	-0.0560799	-0.0184284	-0.147408	0.0547109	0.0584063	0.302117	-0.00105165	0.0376443	-0.0476594	-0.0323962	-0.0909696	-0.0069815	0.0212048	0.0635015	0.0193035	-0.0502545	-0.0492772	0.0169503	0.0550308	0.0180057	-0.042485	-0.0432597	0.0134436	0.0476406	0.0166952	-0.0358934	-0.0379498	0.0105642	0.0412019	0.0153999	-0.0303017	-0.0332681	0.00820956	0.0355995	0.0141403	-0.0255594
Toe1_235.101	0.0485213	-0.042274	0.206738	-0.545132	0.101058	0.0610674	-0.0648717	0.366357	-0.0614526	-0.160687	-0.0604828	0.151371	-0.0298267	-0.155056	-0.301339	0.0452469	0.275786	0.158116	-0.0731114	-0.0243206	-0.181547	-0.0561717	0.0437736	0.0231255	-0.000761047	0.0772616	0.0469445	-0.0528812	-0.0811405	0.0057516	0.0807825	0.0426905	-0.0594849	-0.0804273	0.0125215	0.0839457	0.0379265	-0.0660441	-0.0791247	0.0195142	0.0867149	0.0326545	-0.0725098	-0.0772135	0.0266926	0.0890545	0.0268797	-0.078831
Hnrnpab_983.935	0.0237204	-0.0153259	0.0627469	-0.270758	0.0476295	0.0738103	0.0418478	0.175712	-0.0326664	-0.029129	-0.155775	-0.0830524	0.10381	0.0376856	-0.226617	0.143107	-0.102372	0.240038	-0.106485	0.0462609	-0.12555	0.0464291	0.0106621	-0.0209509	0.0541493	0.0447806	-0.025129	-0.0687743	-0.0237871	0.0530696	0.0641264	-0.00873073	-0.0785972	-0.0486772	0.0451693	0.0829433	0.0147398	-0.0823628	-0.077685	0.0286527	0.0988815	0.0448799	-0.0772134	-0.108837	0.00191756	0.109098	0.0803508	-0.0604739
BC030308_64.698	-0.158267	-0.125329	0.0177935	0.447556	0.199651	0.099249	-0.282472	-0.560727	0.011294	-0.275423	0.152901	0.105643	0.194209	0.112023	-0.235995	-0.0630559	0.140393	0.151623	0.118877	-0.416844	-0.0165719	-0.0527112	-0.000664228	0.0537465	-0.00149755	0.00433324	0.00420672	-0.0023903	-0.00612148	-0.00090332	0.00628902	0.00468973	-0.00430646	-0.0077898	0.000263415	0.00881491	0.00487024	-0.00705078	-0.00960252	0.00226437	0.0119787	0.00449626	-0.0108575	-0.0114094	0.00543706	0.0158088	0.00320479	-0.0159872
Mr1_325.93	-0.0545327	0.255779	-0.124116	-0.0619608	-0.118518	0.00128986	-0.00253642	-0.0141549	-0.0371669	-0.034341	0.0857456	0.122216	0.0705563	-0.13264	-0.054596	0.123109	0.165881	-0.112192	-0.191908	0.0467515	-0.0730497	-0.0284708	0.00533694	0.0730804	0.0767271	0.101294	-0.00757881	-0.114756	-0.069132	0.0632064	0.107517	0.0111751	-0.108193	-0.08462	0.0477308	0.111013	0.0295971	-0.0985918	-0.0980891	0.03064	0.111678	0.0472108	-0.0862334	-0.109091	0.0123286	0.109467	0.0635724	-0.0714843
Sec11c_749.357	0.0532342	0.107926	-0.21233	0.0695677	-0.273099	-0.113999	0.129598	-0.081543	0.181799	-0.116984	0.21902	0.0917485	0.224191	0.103392	-0.382643	-0.543831	-0.0219432	0.0881412	-0.100497	0.326973	-0.101758	0.227911	-0.0771284	-0.129406	0.0582025	0.038763	-0.0320817	-0.0658571	-0.0157537	0.0536164	0.0561196	-0.0133882	-0.070752	-0.038672	0.0419188	0.0696267	0.00971925	-0.0678185	-0.0611388	0.0231479	0.0771858	0.0351042	-0.0561499	-0.0802439	-0.00187184	0.0770118	0.0601252	-0.0358838
Ap3s2_624.861	0.088579	-0.0636431	0.127048	-0.22989	-0.0936311	-0.0566073	0.119112	0.000365213	0.0515456	-0.0112964	-0.111788	0.117205	0.0480042	-0.0988619	-0.151467	0.215062	0.114532	0.0564011	0.0443947	-0.538698	0.0776918	0.0200003	0.0905199	0.00942943	0.0181574	0.0204388	-0.00481111	-0.0258988	-0.0134592	0.0178666	0.0271948	0.000484857	-0.0295464	-0.0218517	0.0157495	0.0344266	0.0081176	-0.0320235	-0.0320486	0.0111641	0.0416733	0.0183969	-0.0325491	-0.0439133	0.00339449	0.0482724	0.0315135	-0.0301802
Puf60_4110.629	0.0472479	-0.029236	0.091394	-0.202288	0.0264202	-0.0422304	0.0395325	0.0663574	0.068863	-0.147857	0.0268629	-0.00739272	0.0193279	0.00800779	-0.075504	0.135082	0.0115051	0.0799882	-0.0374096	-0.208954	0.0388531	-0.00161459	-0.0217393	0.0573126	-0.0451042	0.0453769	0.0689103	-0.0112422	-0.0819397	-0.0303582	0.0659953	0.0652963	-0.0360319	-0.0913091	-0.00920033	0.0851283	0.0545033	-0.0639564	-0.0938422	0.0176736	0.100702	0.0356306	-0.0930669	-0.0875522	0.0488619	0.11051	0.00821584	-0.120656
Fbxw11_1051.179	0.0445334	-0.0599425	0.0404224	-0.169819	-0.000691381	0.0180706	0.0335751	0.0475192	-0.0627787	-0.0277351	0.0996018	0.160413	-0.0403024	-0.139641	-0.553549	0.433485	-0.127041	0.115687	0.146247	-0.291182	0.127279	-0.00199091	0.005051	-0.0501241	0.0320156	0.0331587	-0.00992395	-0.0431281	-0.0204088	0.0298293	0.042491	-0.000617219	-0.0466341	-0.0328627	0.024679	0.0512934	0.0114358	-0.047507	-0.046595	0.0160437	0.0587561	0.0260726	-0.0448848	-0.0609105	0.00349196	0.0639383	0.0428879	-0.0379486
Rassf3_100.62	0.033988	0.00484385	0.0862998	-0.295094	-0.00262537	0.0133002	-0.0343095	0.105599	-0.0519671	0.017546	0.0143118	0.109418	0.0868131	-0.0684235	-0.392498	0.0854701	0.00960642	0.136821	0.203058	-0.584568	0.337743	-0.0536503	-0.0157895	-0.0122349	0.0228843	0.040236	0.00227291	-0.047263	-0.0367544	0.0283509	0.0621529	0.0120716	-0.0677388	-0.0635074	0.0327948	0.0941397	0.0308409	-0.0953267	-0.107348	0.0336709	0.139694	0.0643634	-0.131287	-0.179021	0.0261406	0.202766	0.121007	-0.175938
Cotl1_12246.504	0.0925637	0.0439824	0.0489635	-0.242632	0.00664976	-0.221633	-0.0790645	0.149118	0.0541768	-0.0463736	0.0688901	-0.00465229	0.16413	-0.0142966	0.158402	0.0806498	-0.103521	-0.173047	-0.328357	0.179447	-0.128164	0.0430168	0.119509	-0.013715	0.140486	0.137914	-0.0497517	-0.198851	-0.085776	0.127203	0.171918	-0.00643232	-0.208851	-0.140319	0.101906	0.200619	0.0449246	-0.204662	-0.198212	0.0632376	0.22132	0.101819	-0.183708	-0.255568	0.0101817	0.231283	0.161148	-0.144703
Mgrn1_578.768	0.0115692	-0.0581514	0.0290826	-0.010349	0.00468589	0.0575327	0.0924876	-0.109257	-0.243618	-0.0417779	-0.00599401	0.144517	-0.0183568	-0.0417557	-0.111302	0.410969	0.0557229	-0.094983	0.0309151	-0.459738	0.107459	0.00175524	0.0190481	0.047253	0.0601993	0.0538729	-0.0259447	-0.0811621	-0.0314944	0.0611418	0.0784616	-0.00752248	-0.0964177	-0.0630472	0.0541515	0.104501	0.021028	-0.105723	-0.102954	0.0359442	0.129294	0.0604508	-0.104492	-0.150138	0.00278006	0.149099	0.110281	-0.0875137
Slc9a3r1_4951.409	-0.0684853	0.0320937	0.00843086	0.0823935	-0.0489434	0.0844895	-0.00375494	-0.0365431	-0.158913	-0.0164256	-0.0657049	-0.0665878	-0.10983	0.00463223	0.188605	0.409435	0.044946	-0.20476	0.00831828	-0.230927	-0.0871069	-0.050011	0.0996052	0.0445771	-6.963e-05	0.000193603	0.0001934	-0.000106142	-0.000282638	-4.5983e-05	0.000294304	0.000225911	-0.000201533	-0.00037591	7.50218e-06	0.000431889	0.000246252	-0.000346097	-0.000484344	0.000107957	0.000614386	0.000239679	-0.0005577	-0.000601695	0.000279351	0.000848816	0.000183066	-0.00085804
Cant1_569.145	0.0598135	0.0653912	-0.103208	-0.164259	-0.0562286	0.0392956	0.065138	0.00221904	0.0599621	-0.110484	0.150918	0.11622	0.0493678	0.00560804	-0.389741	0.0357634	-0.0355129	-0.0153486	0.16102	-0.26277	0.192435	0.114538	-0.0524782	-0.0669957	0.0901372	0.0397585	-0.0643903	-0.0925733	-0.00573446	0.0839132	0.0710121	-0.031436	-0.101328	-0.0450618	0.0633231	0.0921309	0.00815972	-0.0929688	-0.0802926	0.03034	0.0993904	0.0479112	-0.068049	-0.104591	-0.0109262	0.0908485	0.0813914	-0.0303946
Pla2g15_195.17	-0.0893604	0.0984021	0.132746	-0.237005	0.111316	-0.0418301	0.148422	-0.0488526	-0.269241	-0.218583	0.12077	0.141285	0.152198	-0.124332	-0.140653	0.245962	0.100574	0.0305432	-0.0829228	-0.143928	-0.0300187	-0.115501	-0.0748604	0.166268	0.0468858	0.138939	0.0437398	-0.114993	-0.114108	0.0366622	0.121158	0.041808	-0.0965296	-0.10075	0.0282492	0.105454	0.0395837	-0.0809588	-0.0888556	0.0213678	0.09162	0.0371792	-0.067822	-0.0782786	0.0157758	0.0794618	0.0346828	-0.0567378
Farsb_2181.346	-0.0728925	-0.0996478	0.020868	-0.0387978	0.0637583	0.172988	0.00508471	0.0902655	0.0154649	0.00272678	-0.0632809	-0.1996	0.0249805	-0.0599928	-0.152578	-0.648499	0.0294304	0.504977	0.224151	0.128008	0.00405277	-0.0405639	-0.105501	-0.108922	-0.00126124	0.0245229	0.016096	-0.0162535	-0.0269091	0.000894673	0.0281702	0.0160724	-0.0202061	-0.0292757	0.00358126	0.0321336	0.0156924	-0.024744	-0.0316077	0.00687395	0.0364076	0.0148724	-0.0299211	-0.0338438	0.0108535	0.0409785	0.0135163	-0.0357917
Aplp2_13263.591	0.130255	-0.149838	0.0788011	-0.113982	0.0168958	0.00069979	-0.0314366	-0.0882184	-0.0500363	0.0580025	-0.0507006	0.123876	-0.10812	-0.0816468	0.120284	0.370424	0.0569093	-0.117429	-0.0839351	-0.365646	0.0370836	-0.0358522	0.00814983	0.123338	0.00411969	0.00241629	-0.00246421	-0.0044414	-0.000837301	0.00399981	0.00396068	-0.00114307	-0.0050493	-0.00269055	0.00321006	0.0052872	0.000713604	-0.00501349	-0.0046148	0.0016953	0.00612692	0.00295208	-0.00416681	-0.0063211	-0.00049955	0.00621624	0.00531726	-0.00242805
Hbegf_1188.267	0.0114888	-0.0691786	0.126347	-0.248655	0.249953	-0.182489	0.0841932	0.106618	0.0347716	-0.306445	0.0624101	0.120584	-0.00567432	-0.12192	-0.0630453	0.042211	0.0381544	0.0741672	0.0109727	-0.0178972	-0.00162947	-0.0113815	-0.185705	0.120351	-0.08279	0.0814317	0.106886	-0.0192876	-0.110236	-0.0353131	0.0737338	0.0657056	-0.0337195	-0.0768805	-0.00733808	0.0604874	0.035971	-0.0366572	-0.0502483	0.00755386	0.0460338	0.0160453	-0.0333558	-0.030431	0.0140632	0.0327733	0.00378075	-0.0273431
Tle2_68.218	0.0166339	0.0274126	0.0490938	0.0614088	-0.167966	-0.0983264	-0.154478	-0.272883	-0.176952	0.03811	-0.0802192	0.618384	0.408572	0.0305376	-0.493022	-0.0482203	0.0325354	0.25565	-0.290203	-0.308905	-0.290443	0.277225	0.0381489	0.0341088	0.0477705	0.0395456	-0.0234283	-0.063892	-0.0223581	0.0515783	0.0636472	-0.00844427	-0.0811493	-0.0522351	0.0475993	0.0913605	0.0185301	-0.0936211	-0.0934194	0.0310159	0.119696	0.0598034	-0.0950372	-0.145815	-0.00426162	0.143709	0.116124	-0.0772626
Mcts2_719.777	-0.086277	0.155125	-0.0234985	-0.0149425	-0.0448948	-0.0860431	-0.0130108	-0.0671503	0.153736	-0.0779087	0.159187	0.0600563	0.0519556	-0.0209169	-0.240191	-0.204913	-0.0230244	0.226957	0.0146526	0.0496295	-0.0983622	0.0908927	0.00214442	-0.0617562	0.00462002	0.0122695	0.00314888	-0.0125051	-0.0125578	0.00601996	0.0189969	0.00624608	-0.0184797	-0.0205013	0.00752908	0.0292373	0.0117258	-0.0271346	-0.0332883	0.00884061	0.044702	0.0211986	-0.03957	-0.0538447	0.00928304	0.0678352	0.037246	-0.0572753
Palmd_1704.262	0.0192362	0.0521582	0.024415	-0.115834	-0.0434977	-0.095594	-0.0535288	0.154962	0.0678939	-0.0377416	0.0663603	-0.0337659	0.00886353	0.0141686	0.0113383	-0.260815	0.183928	0.0907136	-0.0978484	0.02045	-0.0238006	-0.0572644	-0.0129302	0.0516903	0.000727853	0.0225334	0.0137259	-0.0175462	-0.0274872	0.00266916	0.0329073	0.0182375	-0.0270109	-0.0390451	0.00618396	0.0478487	0.023968	-0.041414	-0.0553764	0.0122652	0.0692303	0.0310857	-0.063334	-0.0784551	0.0224488	0.0995852	0.039665	-0.0967837
Endod1_695.605	-0.0777237	0.138774	-0.0353093	0.099014	-0.152614	0.0797177	-0.072482	-0.101019	-0.258455	0.11925	0.281641	-0.128107	0.0895976	0.0157543	-0.116178	0.118209	0.0828268	-0.0913865	0.0572318	-0.14955	-0.0796137	0.000838124	-0.0366725	0.0942056	-0.00134812	0.00509638	0.00471053	-0.00312094	-0.00748739	-0.000910055	0.00821217	0.00610986	-0.00595413	-0.0108953	0.000338736	0.0129307	0.00754838	-0.0106918	-0.0155287	0.00306589	0.0199314	0.00867031	-0.018415	-0.021625	0.00835634	0.030098	0.00876062	-0.0307484
Wdyhv1_443.348	0.0244348	0.00395219	0.101977	-0.190129	-0.0237251	-0.0462892	-0.00497012	0.159354	-0.0337913	-0.0682328	-0.020734	-0.0329222	0.223236	-0.0147363	-0.101781	0.0123881	0.022885	0.0298959	-0.161197	0.0291316	-0.12765	0.150978	0.0385575	-0.0452999	0.00189483	0.0427564	0.0244548	-0.0306076	-0.0451143	0.00442334	0.0483972	0.0253612	-0.0362657	-0.04962	0.00752053	0.0546444	0.0260683	-0.0427773	-0.0544346	0.0112768	0.0615443	0.0265132	-0.0502564	-0.0595542	0.0157935	0.0691438	0.0266211	-0.0588314
Fbxo22_791.849	0.0119039	-0.0580181	0.041905	-0.089493	0.0780332	-0.090132	0.0786063	0.0999929	-0.00855413	-0.181498	0.0405875	0.0117336	0.164197	-0.054235	-0.429752	0.249244	-0.0347046	0.0156698	0.153442	-0.11871	-0.0383449	0.0386856	0.0562646	-0.0728932	-0.00694305	0.00829294	0.0119054	-0.00243577	-0.0142264	-0.00508754	0.0123856	0.0121591	-0.00673585	-0.0168582	-0.00189251	0.0168668	0.0112045	-0.012154	-0.018773	0.00285716	0.0214178	0.00862704	-0.0185833	-0.0194518	0.00929527	0.0255814	0.00400554	-0.0257579
Acaa1a /// Acaa1b_2981.111	-0.00106145	-8.02631e-05	0.054083	-0.0529014	-0.0315324	0.0267525	0.0322193	-0.0567309	-0.0622476	-0.0277467	-0.00467841	0.0963657	-0.01298	0.0152464	-0.119242	0.282359	-0.0333875	-0.072197	-0.00828305	-0.0692942	-0.138069	0.0918169	0.0199617	0.0148169	0.0126888	0.0418158	0.0138484	-0.0308277	-0.0315011	0.00913272	0.0336973	0.0121206	-0.0241128	-0.0258159	0.00647	0.0271128	0.01053	-0.0188371	-0.0211346	0.00449126	0.021783	0.00909009	-0.0146942	-0.0172838	0.00303358	0.0174767	0.00780363	-0.0114437
Ppp2r5c_292.238	0.0595986	0.0765055	-0.0876373	-0.25791	-0.0525193	-0.0793777	0.173325	0.169539	0.110131	0.0893636	0.0284372	-0.0489729	0.00447818	-0.192753	-0.220177	-0.0437812	-0.147406	0.0139142	0.20895	0.143715	0.0376509	-0.00381211	0.0168317	-0.123645	0.0668917	0.0998762	0.00378443	-0.0956142	-0.0645326	0.0436045	0.083991	0.015016	-0.071421	-0.0600049	0.0258666	0.0691084	0.0215021	-0.0519625	-0.0537784	0.0127819	0.055659	0.0245773	-0.0365886	-0.0467985	0.0034893	0.04386	0.025274	-0.0246671
Tfap4_119.244	-0.304564	0.10788	0.0740837	-0.103959	0.169819	0.116942	0.17514	0.217505	0.0181577	-0.452533	-0.172628	-0.0663032	-0.0911763	0.0426375	-0.616029	0.121404	0.239377	0.153474	0.171046	-0.0485852	0.0376627	0.149855	-0.0682501	-0.220235	-0.00582646	0.11661	0.0765341	-0.0795424	-0.132721	0.00342284	0.126241	0.0734961	-0.0929658	-0.137426	0.0137497	0.135923	0.0694049	-0.107363	-0.141425	0.0251808	0.145582	0.0641552	-0.122738	-0.144583	0.037735	0.155136	0.0576359	-0.139084
Cdc26_911.854	0.0493277	0.110522	-0.0985604	-0.0777588	-0.0383137	-0.126346	-0.0675259	0.0546821	0.0975415	-0.0681678	0.0502243	-0.0953195	0.210089	0.011266	0.326286	-0.37571	-0.0457192	0.0699462	-0.0505531	-0.0303019	-0.160055	0.0282355	0.0148803	0.068296	0.00184738	0.0242346	0.0131974	-0.0176923	-0.0251797	0.0030494	0.0280147	0.0143097	-0.0211082	-0.0285264	0.00456359	0.032341	0.0154428	-0.0251299	-0.0322784	0.00645366	0.0372851	0.0165769	-0.0298597	-0.0364782	0.00879457	0.0429262	0.0176861	-0.0354172
Rmi1_48.101	0.260857	-0.180563	-0.138326	0.138761	-0.609905	-0.059909	0.424089	0.115231	0.0277195	-0.199898	0.17645	-0.0375183	-0.10276	-0.123409	0.172991	-0.0854648	0.150863	0.0539715	-0.287568	-0.0750017	-0.171565	-0.000481242	0.313315	-0.136345	0.0138367	0.225201	0.117174	-0.141421	-0.186318	0.0155581	0.145554	0.0692966	-0.0905609	-0.110982	0.0139994	0.0930031	0.0404365	-0.0581452	-0.0666677	0.011391	0.0589366	0.0233174	-0.037357	-0.040208	0.00874703	0.0371253	0.0132903	-0.0239886
Kif3b_524.39	0.0624542	0.0123558	-0.160567	0.105623	-0.131239	-0.0523329	0.151975	-0.0389734	0.0450739	-0.152703	0.132118	0.0876272	0.0741275	0.00479104	-0.274192	-0.102458	0.0770316	0.12573	0.0346518	-0.131541	0.0407553	0.025602	-0.0296499	0.00165855	0.0368498	0.0310376	-0.0162914	-0.0463437	-0.0171085	0.0353845	0.0443535	-0.00433422	-0.0521847	-0.0343056	0.0288527	0.0568899	0.0124922	-0.0533845	-0.053741	0.0161198	0.0668256	0.0337246	-0.0480393	-0.0737185	-0.00365716	0.0720137	0.0581901	-0.0344787
1700037H04Rik_1210.465	-0.0713316	-0.0395909	0.169183	-0.0558324	0.0401137	-0.051254	0.0568143	0.105932	-0.113428	-0.192119	-0.120726	-0.0444527	0.132792	0.120835	-0.167788	0.234619	0.0340169	0.0922395	-0.0254198	-0.377172	0.0881494	0.0223337	0.0107439	0.0159076	-0.0558877	0.0468642	0.082247	-0.00665398	-0.0984383	-0.043992	0.0778765	0.0867275	-0.0397175	-0.122639	-0.0201423	0.112191	0.0812595	-0.0843517	-0.140632	0.0174631	0.14668	0.0616089	-0.14035	-0.146319	0.0692354	0.17698	0.0229912	-0.205518
Xab2_348.425	0.0485632	-0.0646699	-0.059192	-0.0490852	0.0855213	-0.0376443	0.0651457	-0.0166034	0.123855	-0.198292	0.00246547	0.106627	0.0573175	0.0263763	-0.542354	0.206033	0.0246257	0.0395945	0.19963	-0.079969	-0.0918558	0.039864	-0.048113	0.00194434	0.00297217	0.00705759	0.0016039	-0.00610158	-0.00559151	0.00250459	0.00723991	0.00219469	-0.00590047	-0.00605949	0.00200011	0.00738029	0.00279491	-0.00565041	-0.00650554	0.00146061	0.00747602	0.00340083	-0.00535109	-0.00692565	0.000888285	0.00752458	0.00400854	-0.00500253
Arhgef40_298.969	0.0805238	-0.0361327	-0.0288893	-0.0700432	-0.233941	-0.238107	0.147498	0.25873	0.116646	-0.0596108	-0.0347593	0.0151269	-0.0131131	0.119068	-0.754122	0.524152	-0.244818	-0.0484971	0.235258	-0.404291	0.241949	0.0886077	-0.0473355	-0.0944707	-0.0256157	0.0543438	0.0550121	-0.0245842	-0.071352	-0.0142215	0.0605477	0.0476078	-0.0355188	-0.0695159	-0.00246764	0.0650672	0.0387941	-0.0455496	-0.0656504	0.00930754	0.0677831	0.0287933	-0.0543646	-0.0598731	0.0207719	0.0686212	0.0178642	-0.0616826
Sec61a2_153.927	0.094445	-0.142906	0.111518	-0.175362	-0.073969	-0.0766193	0.0775329	0.194	-0.0912179	0.0420635	0.142354	0.0488258	0.169729	-0.244221	-0.473828	-0.0784614	-0.00787007	0.190235	0.0859441	0.21465	-0.205108	0.0703856	0.00876745	-0.0896632	0.0218802	0.0186164	-0.0113141	-0.0316684	-0.0116751	0.0277323	0.0357893	-0.00437198	-0.0474112	-0.0324605	0.029566	0.0608081	0.0140266	-0.0640875	-0.0685113	0.0209853	0.0934828	0.0511401	-0.0753061	-0.126008	-0.00914443	0.130324	0.115196	-0.0680991
Lif_131.253	-0.0224328	0.0567478	0.202809	-0.533136	0.155097	-0.0428673	-0.109175	0.140169	-0.106595	-0.189212	0.118251	0.220122	0.0947136	0.00134641	-0.609041	0.190812	0.159964	0.0779424	0.20705	-0.758167	0.111606	0.197806	-0.0688163	-0.00163861	0.0590524	0.0849921	-0.00330386	-0.101566	-0.068104	0.0584554	0.111004	0.0171851	-0.118528	-0.103923	0.0517668	0.140267	0.0469428	-0.132872	-0.150522	0.036115	0.171778	0.0877395	-0.14147	-0.209804	0.00768068	0.203878	0.141047	-0.140047
Shc2_217.041	0.057559	0.0539826	0.0514724	-0.457255	0.0113245	-0.0180208	0.0746754	0.129836	0.217622	-0.435541	0.00129011	0.155433	0.0130424	0.0815437	-0.529823	0.456713	0.0178642	0.0581827	-0.0920627	-0.450471	0.118898	0.0356565	0.0874266	-0.0475881	-0.107665	0.0774736	0.140609	-0.00595662	-0.164011	-0.0755602	0.11681	0.13209	-0.055097	-0.181039	-0.032234	0.150548	0.110102	-0.108419	-0.182521	0.0191722	0.175258	0.074045	-0.161377	-0.165887	0.0745551	0.187828	0.0242301	-0.208179
Ptpn21_122.344	0.00375697	-0.105127	0.14657	-0.487858	0.368498	0.137999	0.0644179	0.0493538	0.0378846	-0.452113	-0.0496535	0.0326085	-0.0806462	0.104794	-0.200955	-0.0229275	0.158013	0.281045	0.118314	-0.270868	-0.110938	-0.0222248	-0.111338	0.100941	0.120103	0.0649263	-0.0761171	-0.128125	-0.0196702	0.103413	0.0977199	-0.0300724	-0.128944	-0.0657825	0.072032	0.115536	0.0179467	-0.110132	-0.102279	0.0300773	0.116629	0.0609416	-0.0755012	-0.123117	-0.0167194	0.101222	0.0933278	-0.0313309
Ddx52_999.509	0.0254387	-0.024337	-0.0355163	-0.167742	0.0554351	-0.078755	0.178922	0.161075	0.15786	-0.140191	-0.0362234	-0.10136	0.143812	-0.130545	-0.279293	-0.0909439	-0.0194761	0.0754349	-0.0261419	0.24764	0.0372849	0.13649	-0.0847229	-0.140399	0.0161394	0.0556753	0.0194936	-0.0436999	-0.0467398	0.0131609	0.0521038	0.0201018	-0.0395863	-0.0447844	0.0104723	0.0486876	0.0205279	-0.0357719	-0.042827	0.00805331	0.0454261	0.0207922	-0.0322397	-0.0408788	0.00588453	0.0423179	0.0209131	-0.0289732
Bag4_547.848	0.0187869	-0.030493	-0.0359461	-0.0352723	-0.0105129	0.0116206	0.0651555	0.0233476	0.0862019	-0.116707	0.0720955	0.0846623	0.0321633	-0.135891	-0.454042	0.0374839	0.15936	0.104997	0.0958709	0.0401891	-0.091619	0.0268982	-0.00747132	-0.0478915	0.00566053	0.0145218	0.00370659	-0.0130873	-0.0126888	0.00540173	0.0169302	0.00560064	-0.0144187	-0.0156156	0.00487119	0.0196194	0.00797183	-0.0157362	-0.0190572	0.00399053	0.0225984	0.0109074	-0.0169903	-0.0230816	0.0026651	0.0258697	0.014506	-0.018116
Med29_521.057	0.0252982	0.0739205	-0.0618995	-0.143096	0.0284395	-0.0452817	0.0353862	0.052735	0.105369	-0.187766	0.0302932	-0.027335	0.158412	0.00137874	-0.0996733	0.165658	-0.269265	0.126106	-0.00292977	-0.0849914	-0.0867948	0.119657	0.0324821	-0.037615	0.0300748	0.0756654	0.0191223	-0.0768307	-0.075529	0.0335975	0.103212	0.0350058	-0.100284	-0.111394	0.0353301	0.139401	0.0594064	-0.129766	-0.163565	0.0334557	0.186281	0.0958662	-0.166256	-0.239956	0.0250474	0.246046	0.148919	-0.210495
Tecpr1_282.463	0.177419	-0.0873289	-0.256501	-0.12815	-0.0178736	-0.455243	0.227186	0.183196	0.25846	-0.279682	0.292408	0.277027	0.231617	-0.221672	-1.16806	0.00572135	-0.114176	-0.0115546	0.234246	-0.231455	0.328735	0.300348	0.0695385	-0.444313	-0.0307493	0.0205122	0.0429939	0.000427122	-0.0477105	-0.0251424	0.0372301	0.0458531	-0.0165589	-0.060158	-0.0129824	0.0558313	0.0429906	-0.0392903	-0.0689764	0.00675457	0.0743535	0.0320989	-0.0670584	-0.0709418	0.0343008	0.0900228	0.0108742	-0.0979259
Fbxl3_621.487	0.11263	-0.00764368	-0.0302838	-0.165999	-0.0749142	-0.0984745	-0.00689706	0.173742	0.0861029	-0.0110127	0.0944971	0.0246255	0.103084	0.0452323	-0.31238	-0.239726	0.088006	0.0800564	0.0750345	-0.0994943	0.066853	0.0601309	-0.0582285	-0.0103649	-0.00412901	0.0197781	0.0160971	-0.0115285	-0.0241605	-0.00206213	0.0239517	0.0164243	-0.0158607	-0.02711	0.000764038	0.0286116	0.0162513	-0.0210565	-0.0300268	0.0044927	0.0337453	0.0154181	-0.0272144	-0.0327887	0.00927927	0.0393191	0.0137349	-0.0344307
Tpd52_344.802	-0.11	0.10581	-0.0028869	0.165724	-0.192771	0.0912144	0.025821	-0.260723	-0.117637	-0.101615	0.190484	0.190271	0.150477	0.00674021	-0.394422	-0.0233347	0.117351	0.0702231	0.0915923	-0.0418804	-0.215248	0.110663	-0.160919	0.114173	0.099382	0.0805158	-0.0390157	-0.109509	-0.0388743	0.0706492	0.0849574	-0.00639664	-0.089895	-0.0568132	0.042207	0.0806468	0.0181968	-0.0668742	-0.0650256	0.0165699	0.0701112	0.0347336	-0.0435868	-0.0650542	-0.00452468	0.0557712	0.0438722	-0.0223097
Tbc1d20_421.446	-0.0317756	0.0628463	-0.0202955	-0.203258	0.00809772	0.122329	0.206264	0.00751015	-0.00538347	-0.175574	0.0155598	-0.00918777	-0.00206749	-0.100141	-0.239932	0.166885	0.0313977	0.110535	0.115196	-0.231971	0.114963	0.0151086	-0.039879	-0.0290579	0.104899	0.130822	-0.0123588	-0.14889	-0.0871361	0.0776502	0.130512	0.0155861	-0.12752	-0.102018	0.0505047	0.125188	0.0387534	-0.103943	-0.110733	0.0245215	0.115687	0.0570056	-0.0795296	-0.113657	0.000623385	0.102876	0.0703993	-0.0554505
Zdhhc24_230.715	-0.0035169	-0.0341868	0.107334	-0.313871	0.0693112	0.123665	0.122694	0.0910999	-0.0659539	-0.0103099	0.0209943	-0.0282513	-0.0278717	-0.212366	-0.213754	0.078162	0.0480042	0.138405	0.0422362	0.0127733	0.0882367	-0.0586169	-0.0214379	-0.0522423	0.0821346	0.0871994	-0.0185577	-0.101441	-0.0506821	0.0575666	0.0850459	0.00445141	-0.0823646	-0.0604808	0.0348452	0.0782685	0.0216289	-0.0626865	-0.0642297	0.0149689	0.0683014	0.033386	-0.0438202	-0.0630578	-0.00143595	0.0564382	0.0403347	-0.026757
Lrrk1_124.826	0.0387318	-0.0221985	-0.111919	-0.235075	-0.021266	-0.15055	0.197756	0.533525	-0.0711062	-0.336717	-0.16398	0.115871	0.0865482	0.134336	-0.831662	0.332697	-0.169052	-0.0522922	-0.0542205	-0.23036	0.629652	0.00489285	-0.0236601	-0.272083	-0.0553612	0.10181	0.108799	-0.0444375	-0.145044	-0.0325775	0.116334	0.0961357	-0.0686591	-0.144141	-0.00833078	0.127722	0.0799324	-0.0919185	-0.138426	0.016617	0.135583	0.0604681	-0.113359	-0.127963	0.0414932	0.139605	0.0381297	-0.132123
Smap1_489.325	0.091507	0.031326	-0.223055	-0.323733	-0.0508336	0.00798012	0.298503	0.20354	0.168213	-0.229786	0.183693	0.00341191	0.0433533	-0.0926418	-0.895505	0.0221296	0.0173708	-0.129195	0.223029	0.107502	0.195048	0.227041	0.0133705	-0.371287	0.12765	0.160519	-0.0103571	-0.172289	-0.101119	0.0820322	0.138317	0.018278	-0.126261	-0.0999795	0.0463232	0.114869	0.0352881	-0.0886769	-0.0923575	0.0196732	0.0920475	0.0438648	-0.0589103	-0.0811259	0.000865528	0.0710817	0.0465062	-0.0360422
Zc3hc1_901.556	-0.0581044	0.0337169	0.0807007	-0.0511656	-0.0143409	0.00582298	0.0555644	-0.060577	0.00528794	-0.122104	0.0324132	-0.0679246	0.233997	-0.0815193	-0.145558	0.0583164	0.0859622	0.100134	-0.0502765	-0.0725225	-0.176903	0.120975	0.0449072	-0.0269664	0.00437583	0.0124847	0.0036277	-0.0118923	-0.0123769	0.00504468	0.0174811	0.00633217	-0.0158356	-0.0182377	0.00551314	0.024341	0.010569	-0.0209254	-0.026711	0.00551049	0.0336953	0.0170914	-0.0274136	-0.0389212	0.0045838	0.0463558	0.02698	-0.0355601
Rfc3_705.98	-0.115147	0.0682946	0.148456	-0.354527	0.149429	0.0963115	0.113035	0.139576	0.0737396	-0.339043	-0.183761	-0.20055	0.0935444	0.120365	0.0387904	0.0206928	0.0508038	0.0883947	-0.239485	0.0261428	0.0918637	-0.00395847	-0.00538346	-0.0536336	0.0496865	0.0842739	0.00985684	-0.071124	-0.0526564	0.0280243	0.0612628	0.0141622	-0.0463741	-0.0413152	0.0143597	0.043745	0.0149427	-0.0296357	-0.0316352	0.0060885	0.0306974	0.0138897	-0.0184573	-0.023732	0.00134595	0.0211688	0.0120206	-0.0111088
Zfr_1435.862	0.178445	-0.152348	0.00072545	-0.219703	-0.138821	0.0652414	0.142388	0.0756525	0.103274	-0.164616	0.00919469	0.156055	-0.0216838	0.00536753	-0.484345	0.119542	0.0358609	0.1029	0.235249	-0.482644	0.225603	-0.00744856	-0.0603696	0.00745774	0.0445684	0.0781171	0.00749721	-0.0816373	-0.0638781	0.0400695	0.0908214	0.021496	-0.0863699	-0.0827762	0.0326132	0.103591	0.0385806	-0.0889124	-0.104132	0.0215806	0.115964	0.0589012	-0.0884985	-0.127831	0.00628397	0.127373	0.0825151	-0.0842753
Nek6_2600.857	0.0610669	0.00460579	0.0428634	-0.239185	-0.0283595	0.0114488	0.0736489	0.0534202	0.0867302	-0.113526	0.0386515	0.0480871	0.00873374	-0.0487278	-0.200345	0.150662	0.0484837	0.00156811	0.0575429	-0.179529	0.0273192	0.0116554	-0.000611645	0.0160951	0.021365	0.0664379	0.0217333	-0.0562996	-0.0591352	0.0188194	0.0695967	0.0264222	-0.0566137	-0.0644135	0.0159015	0.0726927	0.03143	-0.0566365	-0.0698869	0.0125874	0.0757033	0.0367598	-0.0563379	-0.0755451	0.00885284	0.0786041	0.0424129	-0.0556866
Tnks2_523.471	0.098795	-0.0557564	0.0191118	-0.162991	-0.116331	0.0608396	-0.0421159	0.214828	0.00177882	0.02942	0.102699	-0.0672698	0.0329464	-0.145309	-0.185785	0.0110441	0.0266327	0.119331	0.0646306	-0.16877	0.16819	-0.0909031	-0.00125437	-0.00443225	0.00824457	0.0333532	0.0131198	-0.0280174	-0.0327462	0.00868774	0.0400507	0.0170958	-0.0328951	-0.0403965	0.00895105	0.0480185	0.0221203	-0.0385549	-0.0497919	0.00894095	0.0574771	0.0284435	-0.0451057	-0.0613322	0.00853308	0.0686793	0.0363687	-0.0526672
Nacc1_371.482	0.0932228	0.160905	-0.12432	-0.498442	-0.0115665	-0.0687702	0.134423	0.3106	0.0675323	-0.329786	0.0949156	0.107083	0.00895005	-0.0921359	-0.255849	0.263234	-0.0352812	-0.0969234	0.0671526	-0.574768	0.427771	-0.0273454	0.0398017	-0.0714077	0.0952633	0.239075	0.06828	-0.216922	-0.206041	0.0680713	0.208803	0.0730407	-0.17515	-0.185296	0.0459202	0.181283	0.0749465	-0.14061	-0.165546	0.0281392	0.156456	0.0746894	-0.11207	-0.147021	0.014099	0.13422	0.0728258	-0.0885297
Ccdc64_86.883	0.228829	-0.252292	-0.0449827	-0.166445	0.255803	-0.0952783	0.0610252	-0.0607911	-0.0393135	-0.111276	-0.0882956	0.221472	0.0485564	0.00150851	-0.0559146	0.013346	0.196081	-0.0678026	0.0392854	-0.305307	-0.221766	0.194145	0.0553631	0.0100005	0.0513133	0.0227739	-0.0406097	-0.0604844	-0.00389237	0.0624281	0.0562764	-0.024737	-0.087936	-0.043761	0.0594883	0.0959547	0.0136221	-0.104605	-0.102878	0.0313615	0.132425	0.0772163	-0.0940586	-0.17566	-0.0347447	0.150502	0.161247	-0.0383059
Zpr1_32.943	-0.156796	0.0217273	-0.00820214	-0.00381867	0.0537781	0.0153632	0.363261	0.0691585	0.10319	-0.414895	-0.213708	-0.108692	0.0228648	-0.0309723	-0.27626	-0.0742792	0.312034	0.241741	-0.0899408	0.126715	-0.129541	0.118548	-0.125944	-0.0643964	-0.00991518	0.104539	0.0721765	-0.0662783	-0.117033	-0.00162447	0.107481	0.066081	-0.0735759	-0.11455	0.00667646	0.109915	0.0595962	-0.0805731	-0.111459	0.0149461	0.111828	0.0527476	-0.0872279	-0.107773	0.0231435	0.113208	0.045563	-0.0934993
Gm12942_228.782	0.0697778	-0.0143618	0.0490635	-0.128668	-0.0657256	-0.0695541	0.078171	-0.0558571	-0.291209	0.130412	0.249612	0.180142	0.0921515	-0.196522	-0.190703	0.0676258	0.0135833	-0.0679575	0.183083	-0.0819114	-0.2512	0.141253	-0.11235	0.106746	0.108061	0.0738136	-0.0516218	-0.112008	-0.0305241	0.0773145	0.0832874	-0.0127399	-0.0926134	-0.0538684	0.0453562	0.0806533	0.0165334	-0.067466	-0.064655	0.0161597	0.069435	0.0356671	-0.0413258	-0.064781	-0.00750346	0.0531136	0.0453863	-0.0176294
Trmt112_5142.563	-0.0174489	-0.0205666	0.123386	-0.0310016	0.00606009	-0.090674	0.004907	-0.028433	-0.0270798	-0.0247671	-0.0177613	-0.00310338	-0.0907229	-0.0188622	0.239697	0.208588	-0.0547902	0.0146514	-0.0819982	-0.132008	-0.123452	-0.0430601	0.0604444	0.0799464	0.0315716	0.0339942	-0.0111928	-0.0506073	-0.0258347	0.038736	0.0599707	0.00108875	-0.0740186	-0.0589205	0.0402941	0.097426	0.0298097	-0.0999905	-0.116011	0.0277154	0.147029	0.0851413	-0.120855	-0.209777	-0.0145694	0.205993	0.178908	-0.119842
Gtf2f2_809.396	-0.115223	0.08313	-0.0563288	-0.105153	0.0937811	0.0258292	0.0223231	0.116418	0.0837278	-0.252265	0.0887126	-0.0267109	0.1743	0.060463	-0.68484	-0.359198	0.0295134	0.35737	0.173503	0.208207	-0.0648604	0.0361897	-0.0844263	-0.128987	0.0207854	0.0197326	-0.00938099	-0.0317576	-0.013898	0.0265495	0.0375816	-0.0018638	-0.0481604	-0.0360485	0.0283439	0.0643131	0.0179488	-0.0663142	-0.07549	0.019198	0.10048	0.0586527	-0.0797161	-0.140741	-0.0137651	0.143269	0.130751	-0.0740002
Stxbp1_180.488	-0.00719965	-0.0210368	0.00258505	-0.156726	0.0656746	-0.00532263	0.0942063	0.149537	-0.0275517	-0.0339265	-0.0117066	0.148208	-0.000551668	-0.253496	-0.125034	-0.215903	-0.00494983	-0.0221618	0.196083	-0.038497	0.314659	0.0768112	-0.109996	-0.150366	0.0371838	0.0430313	-0.00670809	-0.0485425	-0.0269264	0.028195	0.0454293	0.00409174	-0.0432945	-0.0341739	0.0183956	0.0454819	0.0138882	-0.0362856	-0.0392692	0.0083038	0.0433461	0.0222903	-0.0280004	-0.0420885	-0.00157338	0.0392659	0.029005	-0.0189495
Lynx1_55.591	-0.247099	0.184606	0.0929221	0.0518854	0.0262135	-0.0138704	-0.0837651	-0.0727448	0.0695054	-0.122023	-0.131558	0.00849831	-0.145259	-0.144106	0.418959	0.347146	-0.134923	-0.252133	-0.136799	-0.035878	0.182086	-0.0449394	-0.0436219	-1.80657e-05	0.0131178	0.042858	0.0147474	-0.0430031	-0.0488751	0.0173258	0.0690918	0.0287016	-0.0670081	-0.0840606	0.0215337	0.110315	0.0538876	-0.104092	-0.144989	0.0240735	0.173963	0.0981559	-0.161431	-0.252628	0.0211887	0.26993	0.173623	-0.25056
Snap23_1990.735	0.0164916	0.0205728	-0.0655614	0.0710828	-0.0770231	-0.029302	-0.0100467	0.00179998	0.00852068	-0.125904	0.0910867	0.0759279	0.226226	0.0610534	-0.258414	-0.153981	-0.00220696	-0.00375467	0.0150729	0.0812194	-0.0576687	0.126806	-0.0782624	-0.0110935	0.00713168	0.0184654	0.00484163	-0.0170104	-0.0168565	0.00698561	0.0227948	0.0079702	-0.0196845	-0.0221372	0.00632062	0.0279143	0.0122057	-0.0224928	-0.0287701	0.00490875	0.033907	0.017846	-0.0253246	-0.0370447	0.00244962	0.0408437	0.0252501	-0.0280086
Hnrnpab_27101.002	0.0378104	-0.00937111	-0.0226599	-0.175001	0.0284478	0.0644958	0.031611	0.159862	-0.00151225	-0.0115767	-0.0236476	-0.0949154	0.0766443	-0.00979525	-0.221282	-0.0380412	-0.0555073	0.165592	0.0637486	0.0033512	0.0355547	0.00527894	-0.0224898	-0.0444928	0.0273788	0.0186208	-0.0146521	-0.0312159	-0.00849247	0.0256539	0.0285171	-0.00500282	-0.0344684	-0.0211228	0.0194673	0.0366129	0.00794882	-0.0331493	-0.0339768	0.00851822	0.0412108	0.0230204	-0.0262419	-0.0450525	-0.00686463	0.0406884	0.0384238	-0.0133949
Rps6kb2_130.24	-0.0757747	-0.0458201	0.104591	0.0663298	-0.0288747	-0.0183805	0.131204	-0.110897	-0.0245156	-0.216293	-0.0378484	0.106021	0.1331	0.0870655	-0.384166	0.0194414	0.260716	-0.0560361	0.130781	-0.265359	0.0413418	0.136508	-0.16025	0.0405093	-0.00191715	0.0247684	0.0174732	-0.0163888	-0.0295461	-0.000395931	0.0312537	0.0198879	-0.0221473	-0.0358751	0.00195185	0.0392487	0.0223748	-0.029635	-0.0433873	0.00541727	0.0490557	0.024823	-0.0393294	-0.0522562	0.0103742	0.0610223	0.0270661	-0.0518369
Ntmt1 /// Ntmt1_20.774	-0.002765	-0.284074	0.532799	-0.0949074	-0.101153	-0.661533	0.220073	-0.0793	-0.35929	0.0696756	0.200069	0.380885	-0.0519983	0.217356	-0.4959	-0.371261	0.62517	-0.296796	-0.138426	-0.325595	-0.0252919	0.441283	-0.430306	0.120301	-0.0355745	0.189719	0.154776	-0.129462	-0.282656	-0.0209079	0.248387	0.177983	-0.196073	-0.364418	0.00489492	0.320635	0.200508	-0.292629	-0.469146	0.0461013	0.408027	0.220158	-0.434667	-0.603942	0.107723	0.511758	0.233644	-0.650136
Gm8539 /// Zbtb8os_56.119	0.23777	-0.420622	0.185628	-0.165435	-0.208331	0.0427793	0.310806	-0.020347	0.030119	-0.161547	0.24143	-0.0107048	0.156054	-0.407639	-0.270384	-0.181005	0.162678	0.146031	0.122155	-0.0492428	-0.23952	0.317342	-0.0447497	-0.135571	0.0679412	0.0545139	-0.0357703	-0.0944352	-0.0325296	0.0767278	0.0959293	-0.0113189	-0.127608	-0.0865144	0.0710011	0.145895	0.0381786	-0.152275	-0.168167	0.0385225	0.197879	0.11861	-0.151701	-0.280899	-0.0385833	0.239963	0.230943	-0.102906
Traf3ip1_182.844	-0.0708413	0.125052	0.0440464	-0.0680814	-0.0949507	-0.0153872	0.0666865	-0.035985	-0.129387	0.0840685	0.00927294	0.0122807	0.19495	-0.171821	-0.218913	0.191971	0.118718	-0.0288014	-0.0546524	0.110939	-0.220057	0.000261738	-0.0484746	0.0928852	0.0229479	0.0462904	0.00787419	-0.043861	-0.0378045	0.0192485	0.0506783	0.0147568	-0.0438592	-0.0451687	0.0144718	0.05465	0.0224245	-0.0428347	-0.0527643	0.00853649	0.0580499	0.0308273	-0.0406406	-0.0604516	0.0013716	0.0607098	0.0398912	-0.0371355
Tpcn1_275.508	-0.0109135	-0.0686585	0.241935	-0.547519	-0.282873	-0.0233288	0.183252	0.415497	-0.0507395	-0.206451	-0.11309	0.20779	0.0554071	-0.296487	-0.937006	0.315297	0.0734174	0.0349072	0.436433	-1.06649	0.730166	-0.0499432	0.0195604	-0.260767	-0.178905	0.142289	0.226174	-0.0214088	-0.27972	-0.11558	0.182753	0.197457	-0.0860424	-0.278915	-0.0497142	0.210394	0.157382	-0.145663	-0.259136	0.0142497	0.224621	0.107978	-0.195851	-0.222945	0.0726684	0.225375	0.051831	-0.232656
Tmem19_848.923	0.106098	0.0319637	-0.0263894	-0.149928	-0.114862	-0.0231578	0.0572234	0.0259365	-0.101334	-0.00563978	0.0911016	0.0833395	0.101448	0.0327972	-0.00525877	0.132934	-0.102143	-0.0770217	-0.132545	-0.187487	0.0840834	0.0526106	0.0581369	0.00292447	0.103482	0.118428	-0.0150108	-0.127659	-0.0698331	0.063995	0.102046	0.0112293	-0.0914035	-0.0712347	0.0336034	0.0834597	0.0263439	-0.0616041	-0.0660012	0.0116032	0.0649486	0.0334681	-0.0382298	-0.0571344	-0.00319195	0.0479758	0.0351062	-0.0207105
Mrpl44_407.721	-0.0592559	0.0588154	-0.0293557	-0.0289893	0.0346629	0.0836788	-0.0441048	0.0490665	0.0543427	-0.157234	0.0317353	0.0545766	-0.0372708	-0.0393133	-0.0735627	-0.107744	0.0929493	0.0962554	-0.0259204	0.0341595	-0.0451468	0.100102	-0.0201165	-0.0598111	0.00743933	0.0158474	0.00298834	-0.0147568	-0.0131603	0.00649248	0.0180416	0.00548546	-0.0153922	-0.0162448	0.00508561	0.0202556	0.00847488	-0.01571	-0.0196507	0.00313824	0.0224257	0.0119926	-0.0156147	-0.023357	0.000564655	0.0244729	0.0160673	-0.0149981
Tpst1_139.223	0.0528745	-0.104975	0.143925	-0.301744	0.151474	-0.0853612	0.195754	0.110205	-0.179564	-0.231979	-0.0978118	0.0947353	0.0252842	0.157812	-0.212181	0.272105	-0.0124308	0.170151	-0.317743	0.0602312	-0.17635	-0.127037	0.185439	-0.00213687	0.0188558	0.122244	0.0575618	-0.0854371	-0.1079	0.014534	0.101318	0.0484272	-0.0693341	-0.0887401	0.0111419	0.0838626	0.0407064	-0.0563146	-0.0730607	0.00848876	0.0693364	0.0341893	-0.0457699	-0.060203	0.00642118	0.0572713	0.0286951	-0.0372177
Paip1_1902.035	0.0257543	0.0321734	-0.165867	-0.0677158	0.0265322	-0.0253434	-0.0192023	0.170868	0.137105	-0.221042	0.121186	-0.00559314	0.169396	0.135843	-0.438072	-0.502598	0.0119773	0.0772591	0.0587329	0.321452	0.0122057	0.0986902	-0.0328016	-0.184008	0.00719379	0.00784195	-0.00206673	-0.0102908	-0.0054379	0.00724543	0.0114239	0.000589457	-0.0122995	-0.00989822	0.00611884	0.0154441	0.00488585	-0.013563	-0.0156538	0.00322279	0.0195214	0.0111699	-0.0133748	-0.0225971	-0.00213525	0.0230193	0.0196794	-0.0108119
Utp23_124.039	-0.238647	0.353545	0.190247	-0.795671	0.343336	0.257138	-0.327966	-0.015457	0.191323	-0.533784	-0.00189026	0.0849346	0.253768	0.039035	-0.353618	0.114672	-0.0449236	0.325141	-0.269476	0.0639251	-0.224729	-0.0491414	-0.181328	0.176004	0.0346109	0.0245414	-0.0178696	-0.0401923	-0.0118634	0.0321784	0.0369363	-0.00542466	-0.044113	-0.0279729	0.0241246	0.0470107	0.0111366	-0.042194	-0.0443716	0.0100461	0.0526563	0.030309	-0.0331495	-0.0585179	-0.00969441	0.0518467	0.0498439	-0.0165487
Git1_590.618	-0.0278046	0.0199663	0.060798	-0.218922	0.0340965	0.0681647	0.145261	0.00469943	-0.0131717	-0.0816819	-0.027956	-0.0207846	0.02128	-0.0770597	-0.247044	0.219192	0.0610353	-0.0203692	0.184495	-0.343696	0.111741	0.0789333	0.00799979	-0.0686529	0.0189358	0.0581213	0.0190788	-0.0541829	-0.0589831	0.0198298	0.0761951	0.0307958	-0.0677683	-0.0823204	0.0192166	0.0991714	0.0477026	-0.0840276	-0.114391	0.016036	0.12809	0.0716623	-0.103146	-0.158527	0.00870011	0.164085	0.105033	-0.125107
Sh3rf1_329.251	-0.00112739	-0.0817038	0.156035	-0.192808	0.0579565	0.130435	-0.0754105	0.122319	-0.0888501	-0.396943	0.0146209	0.195425	0.0300316	-0.0543626	-0.0596118	0.317929	-0.105987	0.120284	-0.0660347	-0.360059	0.106974	-0.0519559	0.0734748	0.00589327	-0.0477896	0.079269	0.0875284	-0.0303627	-0.108187	-0.0279294	0.0838593	0.0722225	-0.0442773	-0.0992229	-0.00994341	0.0853414	0.0565197	-0.0551388	-0.0882829	0.00588887	0.0840718	0.0409325	-0.0629434	-0.0760011	0.0193955	0.080432	0.0259192	-0.0677965
Srebf2_1055.233	0.0654455	-0.0416116	0.0769049	-0.133096	-0.111473	0.00322761	-0.102412	-0.046452	0.00166387	-0.0564486	-0.0208512	0.1437	-0.0394311	0.0411758	-0.227664	0.730904	-0.0991834	-0.38199	0.00622481	-0.457329	0.263643	-0.153768	0.028302	0.0922853	0.000121588	0.0109139	0.00637805	-0.00671282	-0.0101379	0.000413766	0.00988965	0.00548882	-0.00625289	-0.00900302	0.00064485	0.00895312	0.00471008	-0.0058123	-0.00798774	0.000824092	0.00809783	0.00402921	-0.00539222	-0.00708018	0.00095953	0.00731764	0.00343492	-0.00499336
Elp6_76.744	0.0251774	-0.085748	0.238553	-0.211079	-0.21739	-0.173048	0.492723	-0.110469	-0.0913813	-0.0712958	-0.0735675	0.450947	-0.0692487	-0.294184	-0.1484	-0.079603	0.16399	0.112497	-0.0809446	0.0272745	-0.0625584	-0.0443696	-0.0187562	0.0153523	0.099368	0.325036	0.122048	-0.267493	-0.283858	0.0593379	0.241178	0.100014	-0.17944	-0.205725	0.0333172	0.177195	0.0806889	-0.120975	-0.149698	0.0169099	0.129102	0.0642611	-0.08165	-0.109154	0.00692808	0.0933973	0.0506229	-0.0550174
Me2_435.325	0.0349307	-0.0634129	-0.0464705	-0.150857	0.0559613	0.224391	0.0985764	0.0586807	-0.0379852	-0.12566	-0.0171748	-0.107294	0.0123984	-0.141087	-0.0586671	0.0402325	0.0703781	0.124092	-0.0339624	0.147304	-0.11058	-0.0989865	0.116603	-0.0735549	0.145404	0.101538	-0.0591102	-0.13537	-0.0399681	0.0805485	0.0876582	-0.0084549	-0.0851098	-0.0504205	0.0358366	0.0655314	0.0150707	-0.047391	-0.0455922	0.00882353	0.0435778	0.0226566	-0.0221247	-0.0349077	-0.00500448	0.0256735	0.0218592	-0.00693114
Maea_1328.659	-0.0129498	-0.0263219	0.149785	-0.0944142	0.0397791	-0.00688251	-0.131468	-0.0134766	-0.029599	-0.0488728	0.0561885	0.00595931	0.0161325	-0.0429581	-0.098402	0.253564	0.157893	0.0810742	-0.0797224	-0.187321	-0.15069	-0.090943	0.00198307	0.159312	0.00202614	0.00905058	0.00388677	-0.00832708	-0.0105774	0.00270592	0.0146215	0.00697948	-0.0130109	-0.0176712	0.00343454	0.0235458	0.0123857	-0.0202682	-0.0294948	0.00400514	0.0377686	0.0217482	-0.0314823	-0.0492427	0.00393363	0.06028	0.0378016	-0.0487733
Crnkl1_871.578	0.0435441	-0.00128845	-0.0460787	-0.081739	0.0198324	-0.0262984	0.0907284	-0.0338064	0.0738	-0.043405	-0.0871144	0.150737	0.000768875	0.0788743	-0.173348	-0.176476	0.0313233	0.0751625	0.124049	0.00735703	-0.036345	-0.0197744	-0.0662365	0.0419685	0.0212604	0.0123614	-0.014164	-0.0258074	-0.00496678	0.0246881	0.0257416	-0.00696822	-0.0355188	-0.0209698	0.0225185	0.0415198	0.00872394	-0.0411094	-0.0436993	0.0106456	0.0563482	0.0344737	-0.0369926	-0.0710797	-0.0154479	0.0644868	0.0696108	-0.0164371
Mlf2_5624.242	0.046494	0.0459872	0.0312794	-0.144954	-0.0353633	0.034123	-0.0406558	-0.0257565	-0.116382	-0.0899781	0.0608559	0.0325638	0.129323	0.09807	0.0542141	0.0995273	0.022577	0.0452845	-0.0581559	-0.333032	-0.114359	-0.0379629	0.103826	0.108427	0.0775642	0.049408	-0.0460526	-0.0918452	-0.0217318	0.0756864	0.081512	-0.0169801	-0.10622	-0.0637242	0.0587999	0.109106	0.0248293	-0.10458	-0.109796	0.0241755	0.125876	0.075205	-0.0815978	-0.152023	-0.0290582	0.12527	0.1274	-0.0351547
Vat1_815.149	-0.0479264	-0.0448703	0.0406611	-0.250899	0.0713973	-0.00262496	0.19085	0.128456	0.0807816	-0.282669	0.122234	0.137835	-0.193827	-0.134093	-0.617508	0.169355	-0.0616508	0.0470312	0.321974	-0.438351	0.532021	0.0788719	-0.0328628	-0.283299	0.0020501	0.107467	0.0654183	-0.0758578	-0.119735	0.0052621	0.117132	0.0684135	-0.0852231	-0.129245	0.00899899	0.12755	0.0714016	-0.0956355	-0.139445	0.0133219	0.138767	0.0743586	-0.107211	-0.150382	0.0182974	0.15083	0.0772563	-0.12008
Nedd1_603.789	0.0454632	-0.0825745	0.0923657	-0.23072	0.105286	-0.00807698	0.0439843	0.176434	-0.0224821	-0.0880038	-0.0934366	-0.0222459	0.0933555	0.00740615	-0.19027	-0.0735944	0.157493	0.0538546	0.000233727	0.053949	-0.0625332	-0.000401518	-0.0564471	0.0250124	0.0200178	0.0236458	-0.00432857	-0.0294798	-0.0169873	0.019174	0.0323257	0.00315684	-0.0336773	-0.0283584	0.0154097	0.0414682	0.0141842	-0.0357369	-0.0422732	0.0076135	0.0501687	0.0291692	-0.0342296	-0.0583117	-0.00544411	0.0571139	0.0482271	-0.0274527
Rps15a /// Rps15a-ps5_41274.557	0.0184377	0.0285619	-0.0602595	-0.0321512	-0.00094585	-0.0179753	0.00626763	0.0606739	0.044407	-0.00735102	0.00440205	-0.0153416	0.0119355	0.0286285	-0.0635096	-0.086235	-0.0179126	0.0319133	0.0471372	-0.0149994	-0.02303	0.0675229	0.0525368	-0.0772819	-0.00728541	0.0108099	0.0138839	-0.00376493	-0.0172205	-0.00566242	0.0151135	0.0145992	-0.0080391	-0.0204485	-0.00288442	0.0200445	0.0144506	-0.0135279	-0.0234162	0.00131655	0.0254757	0.0130763	-0.020321	-0.0257662	0.00720488	0.0311881	0.0100534	-0.0284416
Foxn3_592.209	0.016746	-0.113109	-0.109646	0.0611331	-0.0157878	0.0218624	0.186561	0.0428584	0.0290792	0.0767615	-0.000358265	-0.220989	0.0873513	0.0734206	-0.431578	-0.33229	-0.0954351	0.120248	0.178618	0.139345	0.317279	0.127407	-0.20523	-0.190779	-0.00649804	0.0052366	0.00994262	-0.000353849	-0.0112067	-0.00568114	0.00916915	0.0111841	-0.00402675	-0.0146027	-0.00346811	0.0140284	0.0114151	-0.00931141	-0.0177489	0.000631807	0.0196073	0.00998524	-0.0163626	-0.0199871	0.00710062	0.0254648	0.00610367	-0.0251493
Hif1a_2229.501	-0.0303775	-0.0354758	-0.178566	-0.0267938	0.0815795	-0.0301532	0.265884	0.288672	0.0131306	-0.173295	0.0116633	-0.00581257	-0.217082	-0.171588	-0.387876	-0.197416	0.0672347	0.188849	0.185847	-0.0170287	0.410778	0.0538597	-0.146002	-0.235359	0.00936684	0.0908237	0.0473105	-0.0634205	-0.0873978	0.00868623	0.0854451	0.0445747	-0.0594023	-0.0819826	0.00805355	0.0803762	0.0419946	-0.0556434	-0.0769118	0.00746551	0.0756	0.0395615	-0.0521265	-0.0721624	0.00691904	0.0711005	0.0372674	-0.0488354
Prmt2_2378.614	-0.0681927	0.0210914	0.116658	0.0695803	-0.0685882	-0.0924319	-0.0485191	-0.0983436	-0.0356398	-0.0419501	0.111942	0.103228	0.119012	0.142871	-0.204292	-0.307982	0.174837	0.0369105	-0.00285487	0.104036	-0.220405	0.0530995	0.000717603	0.0197433	0.0115008	0.0102848	-0.00467709	-0.0148919	-0.00627438	0.0112942	0.0154179	-0.000476672	-0.0173479	-0.0127426	0.00903403	0.0206068	0.00601299	-0.0180992	-0.0204798	0.00400756	0.0249991	0.0148642	-0.0161074	-0.0288222	-0.00441734	0.0274339	0.025781	-0.0102757
H2-K1_2124.407	-0.0214037	0.129817	-0.00260929	-0.079675	-0.0913751	-0.0370383	0.0195278	-0.0187466	-0.0489109	0.0643319	-0.0372588	0.159157	0.0506164	0.0231846	-0.0951561	-0.0656296	0.0624258	0.0836549	-0.044239	-0.166711	0.0504833	-0.0581053	0.0374691	0.0399189	0.0216445	0.0303238	-0.00108852	-0.0332934	-0.0224266	0.0185786	0.0361722	0.00641204	-0.0342506	-0.0311322	0.0135415	0.041372	0.0154816	-0.0333355	-0.0403052	0.00629308	0.0454448	0.0259675	-0.0301056	-0.0494972	-0.00334425	0.047853	0.0375941	-0.024155
Rap1b_20743.063	-0.0178661	-0.0154099	0.0489712	-0.0184819	0.015602	0.0198198	-0.0146577	-0.0111636	-0.0299916	0.028063	-0.00430622	0.00935398	0.00327959	-0.0510142	-0.000299065	-0.0687036	0.0719013	0.0580899	0.031066	-0.00935651	-0.0612759	0.0127331	-0.032911	0.0266082	-0.0145801	0.00721511	0.020778	0.00274906	-0.0232923	-0.0157363	0.0186091	0.0281744	-0.00672527	-0.0375111	-0.0120699	0.0365682	0.0336297	-0.0254408	-0.0545403	0.000856131	0.0619813	0.0326606	-0.0577827	-0.0709633	0.0290234	0.0939718	0.0176415	-0.108501
Dazap1_1955.297	0.143815	0.0575301	-0.0248654	-0.360597	-0.10069	-0.146919	0.144392	0.262992	0.0982927	-0.192996	-0.042619	-0.00645401	0.0948289	0.0649405	-0.122052	0.227058	0.00555072	-0.0344854	-0.149738	-0.358455	0.172704	-0.0349566	0.0862326	0.0147086	-0.0483964	0.0244418	0.060726	0.00598852	-0.0627356	-0.0380269	0.043986	0.0604809	-0.015004	-0.0736411	-0.0212418	0.0624822	0.053459	-0.0391183	-0.0783563	0.00122598	0.0777444	0.0389135	-0.0643104	-0.0749638	0.0278526	0.0875349	0.0166816	-0.087846
Naa40_419.419	-0.0792094	-0.0854131	0.292411	-0.133502	-0.0685407	0.0564368	0.106538	0.104475	-0.126521	-0.111375	-0.189835	-0.108252	0.0723924	-0.0288465	0.285903	0.0401294	-0.0577347	0.0773912	-0.231333	0.150422	-0.143994	-0.056455	0.121251	-0.0406273	-0.0892836	0.101341	0.130264	-0.0273155	-0.14966	-0.050007	0.103841	0.0991164	-0.0480552	-0.126483	-0.0192666	0.100084	0.0705601	-0.0606173	-0.102573	0.00379469	0.0919414	0.0454933	-0.0663813	-0.0795616	0.0201651	0.0809948	0.0244201	-0.0668127
Acp6_309.459	-0.109251	0.0509505	0.0318748	-0.0206875	0.0155442	0.0369694	0.0642154	0.0197916	-0.00882022	0.0990384	0.000681802	-0.103934	-0.0810594	-0.131136	-0.136279	-0.0230891	-0.0578927	0.143813	0.197542	0.0931243	0.00216848	-0.0251126	-0.0713988	-0.0446845	-0.0411487	0.0640376	0.0739222	-0.0230317	-0.089939	-0.0255618	0.0701927	0.0629982	-0.0359228	-0.0853195	-0.0105582	0.0738537	0.0510076	-0.0468624	-0.0784955	0.00347627	0.0751197	0.0383562	-0.0556388	-0.0698641	0.0162235	0.0741414	0.0254463	-0.0621237
Cacul1_584.608	0.166101	-0.109488	0.0500059	-0.373868	0.039223	0.0444841	0.107474	0.0634029	-0.0300706	-0.0577614	0.0362563	-0.023228	0.0582694	0.0118135	-0.363303	0.373902	0.00210544	0.0192964	-0.0195555	-0.189577	-0.0620666	0.0403033	-0.0269869	0.063017	0.0536678	0.0518614	-0.0180955	-0.0702888	-0.0325097	0.0471196	0.0676025	0.00129845	-0.0732764	-0.055484	0.0339164	0.0801701	0.0251123	-0.069061	-0.0787026	0.0135924	0.0875681	0.0518311	-0.0563397	-0.0996182	-0.0137577	0.0878092	0.0793542	-0.034536
Cbr4_730.16	0.0640101	0.0555784	0.0414678	-0.13204	-0.0768921	-0.116969	0.0173421	-0.11623	-0.0432036	0.0271168	0.107497	0.156228	0.00512552	-0.0209557	-0.0981073	0.216994	0.192855	-0.0729278	-0.143874	-0.0506053	-0.311239	-0.00302341	-0.0745269	0.243653	0.0326735	0.0207191	-0.0215672	-0.0428115	-0.00992393	0.0406285	0.0450242	-0.010392	-0.0635224	-0.0399254	0.0395964	0.0772828	0.018661	-0.0795667	-0.0888362	0.0191291	0.112371	0.0724533	-0.077319	-0.157734	-0.036115	0.138559	0.153807	-0.036258
Lztfl1_831.611	-0.0563368	0.0479039	0.0552311	-0.00288288	0.0353029	-0.0722306	0.0711568	-0.112272	-0.057624	-0.175656	0.0396681	0.103916	0.131099	0.0332343	-0.00901375	0.00459401	0.0859646	0.0144096	-0.165747	-0.0396298	-0.12699	0.102407	0.0247456	0.0133574	0.0181291	0.0492911	0.0143562	-0.0427456	-0.0434302	0.0149788	0.0530845	0.0201752	-0.0428982	-0.0498006	0.0110792	0.0566938	0.0266103	-0.0424139	-0.056471	0.00636246	0.0600372	0.0336596	-0.041197	-0.0633878	0.000760563	0.0630242	0.0413119	-0.0391487
Ubr7_358.513	-0.0164272	-0.055431	0.0595302	-0.127617	0.119512	0.0278256	0.0414927	0.206887	-0.0136824	-0.300956	-0.11758	-0.152436	0.0395016	0.111948	0.0112867	0.17171	-0.00905672	0.135571	-0.154779	-0.153529	0.0922217	-0.0532485	0.021401	0.002298	-0.0317871	0.0443645	0.0544005	-0.0142594	-0.063657	-0.020039	0.049598	0.0462738	-0.0242894	-0.0606299	-0.00860998	0.0527832	0.0371989	-0.0327833	-0.0557737	0.00214553	0.0539837	0.0275349	-0.0395512	-0.0494091	0.0119302	0.0533168	0.0176386	-0.0444779
Rab11fip5_422.344	0.0837845	-0.0384812	-0.131077	-0.294103	0.0523717	0.0158518	0.0759591	0.322803	0.117878	-0.283427	0.138359	-0.0590971	0.224327	-0.000804875	-0.679509	-0.428355	0.000939861	0.207128	0.187785	0.0158027	0.319391	0.0202199	-0.0460038	-0.239721	0.0596353	0.0490621	-0.0262986	-0.0741171	-0.0277753	0.0539931	0.0690338	-0.00408953	-0.0795651	-0.0555859	0.0393719	0.0850716	0.0244331	-0.0752935	-0.084039	0.0149828	0.094097	0.0569177	-0.0592657	-0.109155	-0.0189873	0.0930728	0.0900069	-0.0307861
Atxn7l3b_6501.875	0.147947	-0.0903029	-0.0322039	-0.137407	-0.0617716	-0.0663053	0.0908903	0.155345	0.0341067	-0.117353	0.0597501	0.0410739	0.0642902	-0.0123251	-0.205196	0.0854539	-0.0411968	-0.0857327	0.173914	-0.275211	0.195108	0.00135103	-0.0256673	-0.00789617	-0.126278	0.0644496	0.131947	0.00764331	-0.123476	-0.0645971	0.0725205	0.0884579	-0.0223565	-0.094124	-0.0240438	0.0674826	0.0529967	-0.0357052	-0.0659567	0.000407903	0.0560162	0.0266176	-0.038125	-0.0422665	0.0133051	0.0425151	0.00873787	-0.0343237
Tmem17_44.766	-0.0158813	-0.00223048	0.0294143	-0.0692342	-0.0505462	-0.0348058	0.179696	-0.0103704	-0.000776719	-0.237917	0.0154095	0.139675	0.144461	0.0389262	-0.55907	0.17478	0.0723121	0.0877309	-0.0902491	0.1277	-0.246446	0.18284	-0.0349422	-0.0419448	0.0152689	0.073638	0.0322324	-0.056829	-0.0701867	0.0127141	0.0754883	0.0359957	-0.0563273	-0.0739648	0.00995747	0.0772606	0.0398954	-0.0556422	-0.0777948	0.00699248	0.0789456	0.0439295	-0.0547641	-0.0816695	0.00381269	0.0805339	0.0480955	-0.0536833
Galnt10_732.491	0.134519	-0.0354039	0.0469773	-0.248511	-0.0515982	-0.106251	0.0150829	0.150012	0.151692	-0.326802	0.106237	0.0186123	0.10207	0.0373638	-0.0395718	0.171469	0.0197398	-0.0692977	-0.0621604	-0.378944	0.108701	-0.0147213	0.0744111	0.0379879	-0.0379965	0.024279	0.0498148	0.00130575	-0.0516706	-0.027779	0.036833	0.046412	-0.013584	-0.0559054	-0.0146477	0.0473381	0.039083	-0.0286736	-0.0559177	0.000509133	0.0548609	0.0280592	-0.0427479	-0.0513873	0.0165978	0.0586307	0.0138677	-0.0545472
Cav2_14351.394	0.0130683	-0.0309733	-0.0354313	0.00225957	0.00640788	0.00506048	0.0370577	0.0675203	-0.00845943	-0.0934751	0.0287592	0.0336543	0.0599647	0.0543005	-0.197102	-0.26162	0.100352	0.0717351	0.0382712	0.143345	-0.0499258	0.0487902	-0.0665577	-0.0278526	0.00180536	0.0107563	0.00497513	-0.00767971	-0.00983254	0.00149392	0.0106966	0.00524805	-0.00744611	-0.0099611	0.00118161	0.0106282	0.0055162	-0.00720671	-0.0100812	0.000868687	0.0105511	0.00577938	-0.00696171	-0.0101928	0.000555419	0.0104653	0.00603736	-0.00671131
Ndufc1_5354.609	0.092084	0.094639	-0.111055	-0.107096	-0.0136208	-0.160165	-0.0675749	0.0617407	0.0867914	-0.0684452	0.139992	-0.0200534	0.135018	0.0622409	0.074194	0.0445419	-0.151061	-0.163888	-0.132686	0.0975451	-0.108005	0.117169	-0.0396194	0.0533577	0.0611017	0.0759212	-0.0110629	-0.0977167	-0.0593703	0.0599825	0.105994	0.014056	-0.115723	-0.101967	0.0489159	0.139082	0.0526958	-0.127053	-0.158351	0.0227324	0.172324	0.106895	-0.125222	-0.229433	-0.0254511	0.201255	0.17739	-0.101965
Pnisr_293.772	0.0662144	-0.0157019	-0.123795	0.275453	-0.348647	-0.124728	0.0146147	0.00819966	0.0371094	0.0159121	0.111602	-0.0380932	0.246556	0.250667	-0.155369	-0.520588	-0.0353305	0.0144435	-0.106868	0.068317	0.0626425	0.191168	-0.0197602	-0.121431	-0.0059615	0.00372858	0.00820984	0.000375545	-0.00851483	-0.00485342	0.00640387	0.00845061	-0.00233191	-0.0101991	-0.00287043	0.00919066	0.00783581	-0.00562114	-0.0112737	3.42599e-05	0.0118175	0.00616895	-0.00930968	-0.0114307	0.00381912	0.0139488	0.00330667	-0.0131128
Vamp3_1528.428	-0.131509	0.032515	0.13643	-0.043425	0.0872259	-0.00416052	0.0619726	0.0608924	-0.120675	-0.269317	-0.0481991	0.00633072	-0.054938	0.0533617	-0.0269563	0.216019	0.101291	0.111748	0.0372421	-0.158069	-0.20556	-0.0313809	-0.0391661	0.123621	-0.0717693	0.0245494	0.0731851	0.0125954	-0.0635477	-0.041124	0.0369451	0.0532722	-0.00858758	-0.0542259	-0.0172234	0.0397075	0.03395	-0.0205936	-0.0413014	-0.000495483	0.0362348	0.017501	-0.025264	-0.0279482	0.00973652	0.0293697	0.00500568	-0.0247752
Ccbl1_94.711	-0.122936	-0.0106396	0.301751	-0.23842	0.0397306	-0.152705	-0.0740474	0.0571942	0.171334	-0.150036	0.0167886	0.189215	-0.221382	0.144551	0.126472	-0.839684	0.0215395	0.190215	0.361434	-0.155046	-0.019659	0.161321	-0.165847	-0.0541381	0.00825012	0.0213401	0.00583627	-0.0174654	-0.0171596	0.00597613	0.0205457	0.00755359	-0.0155267	-0.0176162	0.00380286	0.0195839	0.00905703	-0.0135625	-0.017842	0.00174714	0.0184774	0.0103464	-0.0115966	-0.0178516	-0.000176726	0.0172491	0.011424	-0.00965124
Mcoln1_184.331	0.215311	-0.22378	0.214462	-0.693972	0.0564643	0.076951	0.339329	0.0720133	0.00969053	-0.0453365	-0.00969321	-0.106208	-0.0242012	-0.220129	-0.176984	0.0974987	0.200219	0.24811	-0.195896	-0.075318	-0.13395	0.0579842	-0.057872	0.0385638	0.046746	0.150217	0.0538696	-0.130201	-0.143406	0.0367241	0.15382	0.0663795	-0.125359	-0.154844	0.0257714	0.156657	0.0791011	-0.119366	-0.165973	0.0138888	0.158665	0.0919628	-0.112205	-0.176684	0.00108264	0.159787	0.10489	-0.10387
Rab14_92.764	0.0397968	-0.0744074	0.134293	-0.119168	-0.1956	0.0301022	0.0477349	0.0648438	0.0173871	0.0267516	0.137453	0.0953422	0.0341651	-0.213183	-0.464896	0.11969	0.0532564	-0.0283485	0.250159	-0.0217645	-0.0206882	-0.042	0.0343913	-0.0593877	-0.00108086	0.0383363	0.0251179	-0.0252863	-0.0428883	3.23429e-05	0.0437816	0.0273961	-0.0298178	-0.0482645	0.00146129	0.0499458	0.0298112	-0.0350961	-0.0542798	0.00326851	0.0569147	0.0323575	-0.0412399	-0.0610063	0.00552692	0.0647827	0.035025	-0.0483869
Crtc2_148.675	0.0850128	-0.118024	0.0686853	-0.319675	0.0603071	-0.0532994	0.0274527	0.191216	0.166482	-0.167468	0.104856	0.0813608	0.0888522	-0.0552874	-0.848754	-0.0796878	0.144892	0.170165	0.222581	-0.0864188	0.176106	-0.115772	0.0335313	-0.134212	0.00376754	0.0343384	0.0184944	-0.0263765	-0.0381643	0.00414301	0.0436038	0.0242322	-0.0332006	-0.0493023	0.00443478	0.0553078	0.0317014	-0.0417919	-0.0637445	0.00456722	0.07006	0.0414038	-0.0526154	-0.0825157	0.00442909	0.0886054	0.0539758	-0.0662654
Cyhr1_133.633	0.0358599	0.106286	0.105019	-0.450927	0.0110199	-0.0304315	-0.0361147	0.131815	0.00182078	-0.163384	0.0447283	-0.0651887	0.410884	-0.10964	-0.30929	0.359672	-0.0268363	-0.0290551	-0.034403	-0.289321	-0.0626433	-0.0882409	0.205626	-0.00311697	0.0517967	0.0728285	-0.00318433	-0.0867635	-0.0592962	0.0489765	0.0967908	0.0184866	-0.0994828	-0.0936717	0.0385273	0.12261	0.0499122	-0.107006	-0.137435	0.01708	0.148363	0.0924172	-0.105233	-0.190931	-0.0196738	0.171172	0.146618	-0.0890449
Arsb_101.82	0.174461	-0.145767	-0.100909	-0.412246	0.0764639	-0.200518	0.372447	0.387264	0.258852	-0.348506	-0.156722	-0.0576372	0.176275	-0.0490974	-0.753207	0.0249172	-0.00996676	0.100266	0.201495	-0.21251	0.323444	0.0789947	-0.0385809	-0.233976	-0.0266051	0.0587926	0.0616581	-0.0270184	-0.08483	-0.0199181	0.0738067	0.0637784	-0.042756	-0.0968887	-0.0101575	0.0904712	0.0638494	-0.0620931	-0.108674	0.00321814	0.108601	0.0611811	-0.0854676	-0.119525	0.0207443	0.127902	0.0549544	-0.113304
Adrbk1_756.75	-0.0513752	0.0473365	0.0192533	-0.147793	-0.0263107	0.0130671	0.150433	0.0532247	-0.00683122	-0.0857299	0.0972631	0.0445072	0.0583068	-0.09374	-0.609111	0.0777724	0.0200789	0.235623	0.123136	-0.135816	0.110427	0.0691593	-0.0348967	-0.114603	0.046976	0.0456012	-0.0176182	-0.0667806	-0.0312123	0.0481874	0.0705846	0.00118977	-0.0821424	-0.0644492	0.0398868	0.0982066	0.032996	-0.0904518	-0.109033	0.0166429	0.124642	0.079669	-0.0844814	-0.163819	-0.0283288	0.143812	0.141053	-0.0553878
Smap1_975.212	0.0264867	-0.0424822	-0.0666414	-0.0922702	0.0372924	0.00957822	0.0676338	0.233754	0.0497486	-0.142043	0.0673293	-0.0047183	-0.0767461	-0.119994	-0.406634	0.0775654	0.0107049	0.119825	0.150862	0.0495233	0.0780478	-0.0766253	0.0596026	-0.133255	-0.00950557	0.0178163	0.0197951	-0.0070906	-0.0247078	-0.00668852	0.0212094	0.0188868	-0.0111728	-0.0260944	-0.0032854	0.0244861	0.0173173	-0.0155368	-0.0269374	0.000688531	0.0275396	0.0150338	-0.0201002	-0.0271337	0.00519954	0.0302545	0.0119954	-0.0247622
Lasp1_3360.36	-0.0317281	0.123487	-0.127634	0.0074415	0.0266469	-0.167546	-0.0586815	-0.0760142	-0.0351841	-0.0581574	-0.0573424	-0.036672	-0.187763	-0.0342206	1.02347	-0.210273	-0.130892	-0.220504	-0.129164	-0.152764	-0.035259	-0.173787	0.0227637	0.14581	-0.0014844	0.00161389	0.00209261	-0.000341058	-0.00198183	-0.000702217	0.00135676	0.00128891	-0.000523696	-0.00137797	-0.000240835	0.00106811	0.000745511	-0.000547805	-0.000920029	1.02634e-05	0.000799391	0.000393461	-0.000492747	-0.000587946	0.00012974	0.000572928	0.000176283	-0.000406323
Vrk2_102.654	-0.0377891	0.143909	0.0488103	-0.304267	-0.0889011	0.0214978	-0.176739	0.416353	-0.193339	-0.18563	0.162006	-0.305942	0.252348	0.31608	-0.406415	0.177701	-0.098867	0.277681	-0.434425	-0.0797419	-0.182468	0.0639572	0.338251	-0.19107	0.0239621	0.0950667	0.0385157	-0.078185	-0.092813	0.0199466	0.10224	0.0474595	-0.0802287	-0.104355	0.0149855	0.10955	0.0574023	-0.0817224	-0.116849	0.00895837	0.116944	0.0683995	-0.0825499	-0.130333	0.00173231	0.12436	0.0805032	-0.0825828
Fundc1_1321.741	0.0548124	0.0735433	0.0197394	-0.158125	-0.0216159	-0.124613	-0.00702983	-0.0543822	0.0200741	-0.0515464	0.145596	0.171635	0.0839555	-0.00213114	-0.0506435	0.0324772	-0.0218018	-0.0988588	-0.0163268	-0.14261	-0.0436942	0.0718755	0.0330784	0.0320934	0.0191095	0.0438966	0.0103718	-0.0370135	-0.0343999	0.0132686	0.0411701	0.0142482	-0.0316018	-0.0347582	0.00794057	0.03809	0.0173651	-0.0263604	-0.0344597	0.00315385	0.034753	0.0197711	-0.0213584	-0.0335957	-0.00107611	0.0312484	0.0215199	-0.0166511
Slc22a18_998.213	-0.0661497	0.135628	0.104741	-0.0527266	-0.118227	0.0120908	-0.08156	-0.246389	-0.152074	0.129849	0.121091	0.122054	-0.0227424	-0.0190151	0.117602	0.249353	0.00509823	-0.127183	0.0579258	-0.38989	-0.163753	0.0731334	-0.00181753	0.147254	0.0201897	0.0142573	-0.00969412	-0.0219597	-0.00678906	0.0167692	0.0194979	-0.00214392	-0.0216053	-0.0141695	0.0109163	0.022372	0.00602296	-0.0183022	-0.0200246	0.00327671	0.0223913	0.0137362	-0.0123694	-0.0234654	-0.00522612	0.0194127	0.0199503	-0.00450421
Tnfrsf1b_1233.804	0.121628	-0.030428	-0.131189	-0.0675818	0.0307895	-0.0797253	0.0431984	0.0901268	0.0379025	-0.139223	0.0445068	0.193801	-0.0352989	-0.0200673	-0.120105	0.099953	-0.0520695	-0.0502008	-0.0108953	-0.185697	0.157797	0.0607925	0.0184076	-0.0502019	0.0675937	0.0718265	-0.0160435	-0.0871322	-0.0454392	0.0509981	0.0793781	0.00689949	-0.0781495	-0.0627063	0.0312321	0.0812176	0.028225	-0.0639329	-0.075019	0.00969265	0.077436	0.0465735	-0.0457993	-0.0815556	-0.0120942	0.0684543	0.0608776	-0.0252834
Zfand2a_118.614	-0.133741	0.0232642	0.0911908	-0.124366	-0.0374184	-0.0606861	0.336385	0.198675	-0.013992	-0.0568225	-0.0253009	-0.391958	-0.0166377	-0.165307	-0.391702	0.101548	0.147374	0.230778	0.251537	0.190619	-0.277897	-0.0307145	-0.154655	0.0278578	-0.146929	0.083057	0.17306	0.00863043	-0.192068	-0.104649	0.123037	0.158078	-0.0436556	-0.203149	-0.0551711	0.153658	0.131281	-0.0950422	-0.197909	-0.00270685	0.173137	0.0939658	-0.141236	-0.176735	0.0486641	0.180343	0.0481467	-0.177938
Pi4k2b_1119.962	-0.0624175	0.10704	0.0736594	-0.0367192	-0.126336	-0.00701623	-0.0852172	0.0534854	-0.00159703	-0.111755	0.146716	0.0455691	0.150175	0.0111835	-0.226807	0.0559462	-0.0264435	0.0200599	-0.0665983	0.0228353	-0.0292676	0.0471792	-0.0253628	0.012785	-0.00634705	0.0650222	0.0448639	-0.0380221	-0.0680394	-0.00298507	0.0613953	0.0395246	-0.0375929	-0.0621991	-7.86318e-05	0.057849	0.0346437	-0.036959	-0.0567536	0.00241733	0.0543962	0.0301931	-0.0361536	-0.0516845	0.00454411	0.0510472	0.0261453	-0.0352066
Traf3_47.035	0.270891	0.083199	-0.173547	-0.561901	-0.0191221	-0.160255	0.280074	-0.112953	-0.112336	-0.111849	-0.111067	0.76327	0.127773	-0.102706	-0.299285	0.194636	-0.0764065	-0.0616724	-0.119842	-0.486293	0.0675878	-0.0055572	0.0758614	0.0783799	0.15006	0.24422	0.0279106	-0.246425	-0.185234	0.092007	0.206514	0.0563972	-0.177261	-0.171659	0.0470885	0.169811	0.0717834	-0.122903	-0.152436	0.0139234	0.135694	0.0778745	-0.0809441	-0.130791	-0.00921418	0.105161	0.0775535	-0.0492172
Snn_576.616	0.135347	-0.0735729	-0.0114569	-0.201143	0.0370795	0.0415584	-0.134038	0.0434667	0.116123	-0.0279772	-0.0204665	0.0143149	0.117597	0.130447	-0.121201	0.0113575	-0.275749	0.17854	-0.229798	0.205458	-0.0982933	-0.0400049	0.118443	-0.0454526	0.00084179	0.000433208	-0.000617386	-0.00102916	-0.000149504	0.0010753	0.00108481	-0.000338513	-0.00155552	-0.000920705	0.00103733	0.00195263	0.000441185	-0.00191114	-0.00213382	0.000426971	0.00285037	0.00191477	-0.00171341	-0.00369324	-0.00112147	0.00335757	0.00414936	-0.000410992
H2-D1 /// H2-L_90.464	-0.0485108	0.0919832	0.0304501	-0.172044	0.0109928	0.0778814	-0.159958	0.203768	-0.124963	-0.111875	0.183766	-0.0874071	0.234548	-0.240696	-0.191277	0.155262	0.019591	0.175878	-0.0607703	-0.245986	-0.0577182	0.0768327	0.196031	-0.135572	0.0275174	0.0335812	-0.00636866	-0.0456411	-0.0276277	0.0313237	0.0556881	0.00674157	-0.0629545	-0.0568389	0.0289991	0.085735	0.0336329	-0.0797651	-0.103901	0.0135383	0.12316	0.0813692	-0.0891338	-0.175887	-0.0269239	0.164507	0.157624	-0.0780316
Gsr_2704.557	0.0343833	0.110551	0.0154464	-0.264781	-0.0663305	0.0122462	-0.0237844	0.156564	-0.0204339	-0.071845	0.0692138	0.0458115	0.0637514	-0.0825832	-0.0140244	0.159878	-0.111962	0.0252772	-0.0643193	-0.174048	0.113816	-0.0619102	0.0510532	0.0194881	0.0542941	0.12984	0.034881	-0.0979932	-0.0906077	0.0273625	0.0891109	0.0319226	-0.0602343	-0.0649302	0.0117979	0.0602379	0.0270252	-0.0364821	-0.0459696	0.00329237	0.0401423	0.0217732	-0.0216371	-0.0321834	-0.000988196	0.0263804	0.0169376	-0.012464
Tbc1d22b_232.006	0.0615295	-0.0062631	0.0254557	-0.207837	-0.13045	0.00160834	0.127418	0.172705	0.117569	-0.518003	0.0196512	0.173692	0.0345796	0.0415508	-0.212213	0.249578	-0.0529764	0.0829931	0.0500239	-0.58601	0.130078	0.099388	0.0860298	-0.0577405	-0.0366093	0.141357	0.117137	-0.076773	-0.173415	-0.0219319	0.140703	0.103664	-0.0849866	-0.16245	-0.0084775	0.139042	0.0904427	-0.091835	-0.151151	0.00377323	0.136472	0.0775556	-0.0973663	-0.139651	0.0148464	0.133085	0.0650764	-0.101638
Dnajc14_2361.749	0.0679261	-0.0542086	-0.00593466	0.0618709	-0.106739	-0.0151195	-0.0663867	-0.0602262	0.0505828	-0.0591833	0.0388335	0.0754468	0.19819	0.156152	-0.0761235	-0.325611	0.0808717	-0.10534	0.0306941	0.0177019	-0.0765313	0.0733711	0.0510246	-0.0374693	-0.000321871	0.00200227	0.00157497	-0.00117042	-0.00240385	-0.000228124	0.00242186	0.00173317	-0.00152199	-0.00278963	-8.99657e-05	0.00291702	0.00189057	-0.00195518	-0.00322489	0.000104829	0.00349923	0.00204126	-0.00248615	-0.00371319	0.000371178	0.00418129	0.00217725	-0.00313375
Bet1l_213.9	0.0193344	-0.0307499	0.150485	-0.127202	-0.150769	-0.0358837	0.0314838	0.128074	0.189831	-0.322608	0.024952	-0.0608036	0.209862	-0.0808192	-0.13041	0.134964	0.0239171	-0.00322616	0.0905032	-0.0675099	-0.117366	-0.119333	0.0492393	0.0704903	-0.0999382	0.0343298	0.101038	0.0176705	-0.0899627	-0.05869	0.0515431	0.0753744	-0.0113778	-0.0781408	-0.0258659	0.0562565	0.0497016	-0.0287745	-0.0609534	-0.00221153	0.0525193	0.0270719	-0.0363954	-0.0425975	0.0129191	0.0438202	0.00916619	-0.036766
Rcor1_247.747	0.146935	-0.258315	-0.115419	0.0729056	0.120051	0.0383729	-0.111541	-0.0754982	0.106646	0.0593295	0.0803167	-0.0752203	0.100786	0.0860759	-0.678378	0.232001	-0.211953	-0.0908659	0.167024	0.148705	0.231164	-0.0599797	-0.12958	-0.0674574	0.00741139	0.00509141	-0.00427348	-0.00926292	-0.00266803	0.00825901	0.00970469	-0.00146896	-0.0122597	-0.00826975	0.00710158	0.015028	0.00419938	-0.0137429	-0.0159456	0.00260241	0.0199163	0.0132669	-0.0119211	-0.0249273	-0.00663983	0.0224079	0.0255932	-0.00460088
43351_949.878	-0.018618	0.0179907	-0.0227619	-0.197637	0.0796917	0.0573584	0.12583	0.0722822	0.00736863	-0.0750747	0.0234827	0.0703883	-0.0846207	-0.116852	-0.39721	0.0341808	0.0845222	0.13594	0.212242	-0.230173	0.199478	0.0139578	-0.0477956	-0.0905739	0.0621718	0.0431287	-0.0352978	-0.0780457	-0.0225209	0.064213	0.0750206	-0.0107178	-0.0963187	-0.0640779	0.0514346	0.106671	0.0305383	-0.100468	-0.115973	0.0175736	0.130525	0.0869935	-0.080771	-0.171053	-0.0431165	0.136695	0.152817	-0.0291534
Trim26_259.513	0.00285871	0.162388	-0.063395	-0.204096	-0.00240912	-0.160127	0.11643	0.0566105	0.0899516	0.00537532	-0.00317507	0.0803689	0.0425219	-0.0665878	-0.157396	-0.114764	0.185322	0.0126399	-0.00317589	-0.14339	0.0499736	-0.033375	0.129755	-0.0698227	-0.00475305	0.0556234	0.0389215	-0.0341545	-0.062153	-0.00271005	0.0591552	0.0390822	-0.0378939	-0.0646549	-0.000449579	0.062817	0.0391102	-0.0418805	-0.0671631	0.00204128	0.0666079	0.0389917	-0.0461256	-0.0696681	0.00477574	0.0705263	0.0387121	-0.0506402
Zfand6_9866.178	0.0511804	0.0173528	0.0481908	-0.0356419	-0.0852004	-0.108916	0.00498293	-0.112024	-0.00576726	-0.00902375	0.114018	0.0607487	0.0383352	-0.0117142	0.114678	0.178069	0.0527165	-0.177393	-0.188833	-0.059444	-0.0821101	-0.00943396	0.051399	0.0877086	-0.00046732	0.00108993	0.00120902	-0.000521011	-0.0017209	-0.000451391	0.0017137	0.00157304	-0.00102083	-0.00245015	-0.000319394	0.00263639	0.0019863	-0.00183793	-0.00343174	2.52194e-05	0.00397882	0.00241163	-0.00313696	-0.0047237	0.000736687	0.00590029	0.00276909	-0.00515568
Map3k14_33.554	0.0407725	0.0135543	-0.0344632	-0.0293198	-0.0351978	-0.0581557	0.0341988	-0.0746068	0.127923	-0.143244	-0.00253036	0.21259	-0.120762	0.240495	-0.135678	-0.131596	-0.0362049	0.120237	0.0213433	-0.155763	0.109692	-0.13182	0.0298679	0.0412085	0.0337154	0.0218816	-0.0173057	-0.035518	-0.00961793	0.0274049	0.030315	-0.0042406	-0.0341644	-0.021667	0.0171654	0.0341847	0.00911717	-0.0277778	-0.0303974	0.00449708	0.0330329	0.0208194	-0.0174324	-0.0345148	-0.00874151	0.0270983	0.0292315	-0.00477366
Bbc3_445.842	0.211383	-0.0866028	0.0178455	-0.77083	0.140015	-0.139206	0.23197	0.3571	0.143398	0.0778924	-0.0153186	-0.238214	0.0920812	-0.183934	-0.676539	-0.192158	0.304107	0.363089	0.103289	-0.213216	0.0111741	-0.0476223	0.0414993	-0.104403	-0.00573566	0.00839239	0.0112746	-0.00280246	-0.0143646	-0.00522911	0.012877	0.013332	-0.0066549	-0.0189815	-0.00359643	0.0188654	0.0150323	-0.012461	-0.0243514	-0.000232478	0.0266205	0.0158692	-0.0208736	-0.0302667	0.00566508	0.0363488	0.015079	-0.0326763
Ino80c_772.014	0.0156258	0.0696105	-0.115263	0.0292393	-0.00163848	-0.0114037	-0.0273567	-0.0730596	0.107256	-0.224456	0.0562124	0.0249973	0.126959	0.13279	-0.022771	-0.185871	0.0475285	0.111048	0.0660543	-0.128319	-0.207308	0.0694904	-0.0459036	0.0997154	0.00236668	0.00441469	0.000546616	-0.00452882	-0.00386469	0.00224903	0.00589681	0.00174633	-0.00532148	-0.00577381	0.00175947	0.0076511	0.00355548	-0.00597986	-0.00827231	0.000701291	0.00964135	0.00616384	-0.00632487	-0.0114503	-0.00118698	0.0117763	0.00978915	-0.00609314
Nr1h4_201.6	-0.144121	0.0116349	0.114646	0.0718848	-0.0104064	0.076542	0.0575769	-0.0224192	-0.166008	-0.111245	-0.0331014	-0.0284631	0.133524	-0.215781	-0.0148414	-0.0345005	0.351273	0.0938152	-0.0667003	-0.0872295	-0.0565941	-0.0241862	-0.0785617	0.0711928	0.00778447	0.0164987	0.00316033	-0.0159296	-0.0146523	0.00698501	0.0206441	0.00697286	-0.0178345	-0.0202076	0.00518505	0.0252749	0.0122126	-0.0192684	-0.0270564	0.00199902	0.0302683	0.0191911	-0.0198603	-0.0353244	-0.00305355	0.0354094	0.0282363	-0.019114
Ikbkg_901.522	0.0950423	0.0329382	-0.0146864	-0.115676	-0.200793	0.0136677	-0.0252025	0.104868	0.00751212	-0.0997443	0.123866	0.126765	0.101742	0.00666807	-0.126566	0.00517012	-0.114956	0.0766089	0.0655049	-0.254675	-0.0566948	0.0697572	0.137819	-0.0479856	0.0544606	0.0905765	0.00685298	-0.0997107	-0.0785886	0.0487205	0.113763	0.030819	-0.109992	-0.114032	0.0357028	0.137876	0.0631252	-0.114945	-0.157359	0.0127903	0.161338	0.104539	-0.111416	-0.208682	-0.0232749	0.181955	0.155321	-0.0956558
Tle3_686.439	0.0970951	-0.126465	-0.0704007	-0.114397	-0.0231657	0.0183754	0.0125582	0.257074	0.0554287	-0.0717028	0.0244853	0.125006	-0.0247665	-0.0179145	-0.642182	-0.115807	-0.0715583	0.13713	0.295351	-0.163667	0.388647	0.0171519	-0.160719	-0.123499	0.0192048	0.0457137	0.0112921	-0.0424979	-0.0415958	0.0164443	0.0542393	0.0202687	-0.0457834	-0.0539033	0.0116911	0.0632933	0.0316982	-0.0479183	-0.06838	0.00437646	0.0726187	0.0459198	-0.048318	-0.0851464	-0.00617708	0.0818491	0.0632498	-0.0462618
Tle3_484.077	0.122969	-0.0571285	-0.0299776	-0.276508	-0.0516077	-0.0870014	0.0994627	0.0953827	0.197134	-0.15498	0.0759661	0.260867	-0.0460914	-0.1114	-0.578229	0.0489669	-0.0764667	0.0237232	0.415906	-0.462398	0.40354	-0.130275	0.00605328	-0.0924946	0.0451845	0.0746194	0.00610875	-0.0768676	-0.0598962	0.0358761	0.0835603	0.0224435	-0.0749953	-0.0764662	0.0232499	0.0904522	0.0404819	-0.0693946	-0.0927173	0.00719856	0.0946664	0.0597072	-0.0596948	-0.107813	-0.0122675	0.0955688	0.0794836	-0.0456755
Ubfd1_165.556	-0.00268154	-0.0490931	0.229683	-0.328571	-0.0213934	0.197114	-0.151702	-0.00807581	-0.187867	0.129964	-0.00454191	0.0875381	0.0634151	-0.148631	-0.382532	0.543255	-0.161465	0.142297	-0.0461538	-0.295323	0.129738	-0.0387062	-0.186625	0.150156	0.022975	0.0472546	0.00808286	-0.0513313	-0.047327	0.0247742	0.0712179	0.0240977	-0.0694851	-0.0805647	0.0218968	0.104315	0.0526006	-0.0903943	-0.133211	0.00933882	0.148342	0.100213	-0.111336	-0.215895	-0.0216985	0.204354	0.175437	-0.125983
Evl_4102.536	0.0770112	0.00738421	-0.00325375	-0.176838	-0.0291651	-0.0834752	-0.032415	0.204002	0.0945722	-0.174477	-0.0228952	0.00660899	0.21054	0.159531	-0.446641	0.0775177	0.107352	-0.0289953	-0.0238093	-0.0851532	-0.0815388	0.078845	0.0346746	-0.0154961	0.0356806	0.0593934	0.00465132	-0.062523	-0.049269	0.0303462	0.071516	0.0193488	-0.0656199	-0.0678795	0.0209667	0.0831026	0.0378224	-0.065215	-0.088752	0.00664402	0.0932193	0.0600785	-0.0600746	-0.111253	-0.0135592	0.100709	0.0858722	-0.0489006
Ncbp2_3206.921	0.0970681	-0.0430793	-0.0442482	-0.102405	-0.0074926	-0.0397915	0.0541941	0.0453213	0.0413429	-0.0442502	0.0287926	-0.00920338	0.120081	-0.052854	0.0850003	-0.321697	0.0832255	0.039186	0.0110413	0.0441491	-0.164635	0.121901	0.020722	-0.0350868	0.0269653	0.0198641	-0.0138929	-0.033114	-0.0108873	0.0268337	0.0328782	-0.00319289	-0.0392895	-0.0274627	0.0205535	0.0453057	0.0138071	-0.0397085	-0.0468702	0.00616112	0.0541081	0.0364481	-0.0311937	-0.0661372	-0.0176499	0.0554705	0.0625003	-0.0111033
Ing5_60.805	-0.136425	0.220224	-0.0996489	-0.111582	-0.062165	0.049898	0.276423	0.0601841	-0.00751859	-0.214519	-0.0183698	-0.117105	-0.0550762	-0.0545074	-0.294943	0.146861	0.246397	0.341969	-0.119132	-0.109941	-0.124233	-0.010921	-0.0828532	0.0713494	0.036588	0.105079	0.0341783	-0.0917248	-0.097984	0.0278519	0.111577	0.0476308	-0.0895623	-0.11181	0.0173654	0.117214	0.0620744	-0.0855965	-0.125837	0.00502175	0.121792	0.0774023	-0.0796529	-0.139846	-0.00927646	0.125102	0.0934827	-0.0715731
Slc35a5_2281.74	0.0271192	-0.0514671	-0.0345233	0.043489	-0.139074	0.0448499	0.145121	0.0284235	-0.000128813	-0.101507	0.0481654	0.0289229	0.0543148	0.0432799	-0.329442	-0.209091	0.17184	0.0264339	0.162012	-0.0228262	-0.019847	0.117168	-0.0942461	-0.041028	0.0381293	0.0322733	-0.0167706	-0.0494806	-0.0199351	0.0371377	0.0501109	-0.00122657	-0.0577467	-0.0435276	0.0280106	0.0672927	0.0227599	-0.0584268	-0.0715045	0.00797601	0.0801142	0.0545739	-0.0472243	-0.100403	-0.0252761	0.0837949	0.0917547	-0.0202998
Pank1_216.453	-0.0193953	-0.0128898	0.104137	-0.333098	0.182529	-0.00880233	0.111081	0.120692	-0.0448472	-0.178985	-0.099457	-5.72654e-05	0.301325	-0.0956429	-0.327596	0.13149	-0.0773023	0.0993173	-0.144887	0.0474986	0.0979892	0.133908	-0.0849772	-0.0836793	0.0432468	0.0809569	0.0131761	-0.072925	-0.0612686	0.0280849	0.0744683	0.0234072	-0.058835	-0.0623056	0.0147059	0.0667788	0.0309263	-0.0455178	-0.0610666	0.00324055	0.0583425	0.0360205	-0.0332662	-0.0580202	-0.00626661	0.0495572	0.0389925	-0.0222763
Mesdc1_577.408	0.023807	-0.0220445	0.0143035	-0.17691	-0.0445137	-0.0583756	0.199753	0.147083	0.134983	-0.251709	-0.0429348	0.177003	-0.0384663	-0.0817855	-0.170283	-0.103871	-0.0170816	-0.0475041	0.166146	-0.296545	0.324505	0.171861	0.0283566	-0.233593	-0.00627726	0.0865615	0.0585951	-0.0520104	-0.0919816	-0.00377256	0.0823139	0.053645	-0.0506649	-0.0858081	-0.00154262	0.0782221	0.0490361	-0.0492693	-0.0800117	0.00043585	0.0742846	0.0447491	-0.0478352	-0.074571	0.00218432	0.0704992	0.0407656	-0.0463729
Stk24_5380.558	0.183589	-0.0370535	-0.0629563	-0.175738	-0.221717	-0.0481584	0.089316	0.0944507	0.0581616	0.0413534	0.168787	0.191625	0.0272835	-0.0340107	-0.434973	-0.0685971	0.00021751	-0.0699723	0.0973195	-0.0357812	0.0924273	0.0794006	-0.0116212	-0.0701488	0.0630555	0.0545352	-0.0227227	-0.0731367	-0.0306207	0.0471294	0.0636679	0.00074882	-0.0649762	-0.0483048	0.0273227	0.065561	0.022047	-0.0505575	-0.0596598	0.00588123	0.0605862	0.0392073	-0.0320152	-0.0638277	-0.0148629	0.0497189	0.0508855	-0.0117251
Foxp1_759.387	-0.0147605	0.0299911	-0.116508	-0.15309	0.0764989	-0.187139	0.16932	0.174716	0.223089	-0.193341	0.0934922	0.0331152	0.0926072	-0.0444781	-0.696089	-0.282941	-0.110102	0.105534	0.233429	0.106208	0.45202	-0.0105657	-0.145918	-0.22534	0.00464783	0.0221011	0.0097856	-0.0173299	-0.0220691	0.00382339	0.0256602	0.0130429	-0.0190297	-0.0267622	0.00255309	0.0296571	0.0170622	-0.0207004	-0.0322979	0.000712233	0.0341162	0.0219856	-0.0222715	-0.0388039	-0.00185176	0.0390555	0.0279758	-0.0236489
Ate1_379.611	-0.0251063	-0.109753	0.0989329	-0.0186265	0.0377856	0.0437565	0.036279	0.0466032	-0.0322624	-0.122698	0.00985344	0.0610896	-0.026175	-0.0384828	-0.437316	0.204501	0.162449	0.0108311	0.100413	-0.129737	0.0752168	0.00835393	-0.0172667	-0.0535802	-0.00753515	0.0158877	0.0172934	-0.00671844	-0.0225975	-0.00611626	0.0200646	0.0182755	-0.0106457	-0.0260115	-0.00394372	0.0248302	0.0188237	-0.0155006	-0.0295042	-0.000850904	0.0301848	0.0187643	-0.0214052	-0.0329511	0.00334556	0.0361044	0.0178878	-0.0284803
Adk_3825.318	-0.0569252	0.0611404	0.0510798	-0.0168414	-0.0315871	0.00842839	-0.0290683	-0.0278633	-0.0383254	-0.0121072	0.0889655	0.00663728	0.0888372	-0.0816642	-0.0706717	-0.0129111	0.0250152	0.127771	-0.0620439	-0.0352519	-0.0649559	0.0630328	-0.00782756	0.00193384	0.0177546	0.0306227	0.00224634	-0.0350851	-0.0289435	0.0190756	0.0472825	0.0134596	-0.0470611	-0.0515423	0.0162857	0.0700299	0.034212	-0.0595019	-0.0869801	0.00509944	0.0994607	0.0695768	-0.0690602	-0.140999	-0.0217832	0.135015	0.125955	-0.0690706
Ppig_1653.429	0.0879934	-0.0405592	-0.136254	-0.0640411	-0.0819653	0.0517492	0.167142	0.127654	0.0886828	-0.0840109	-0.119932	-0.0441421	0.137602	-0.0306268	-0.169484	-0.200848	0.0291245	0.0223422	0.168123	-0.163464	0.213831	0.0907882	-0.057529	-0.107122	0.0423855	0.0349265	-0.0166072	-0.0483918	-0.0191846	0.0328631	0.0431717	-0.000438635	-0.0447257	-0.0328103	0.0195757	0.0463192	0.0153992	-0.035834	-0.0424837	0.004043	0.0440988	0.0290963	-0.0229039	-0.0470389	-0.0119345	0.0368153	0.0391566	-0.00758119
Gm11787 /// Lyn_786.967	0.0526181	-0.170448	0.0803752	-0.0436992	0.014798	-0.0231687	0.205711	-0.0513468	0.0705764	-0.190629	-0.0745799	0.0722236	0.00223339	0.0149736	-0.319529	-0.00406864	0.334582	0.0336416	0.0137706	-0.186877	0.0880492	-0.0180178	-0.0555281	0.0156224	-0.019548	0.0122844	0.0275225	0.00162667	-0.0296308	-0.017753	0.0221644	0.0309382	-0.00737513	-0.0384897	-0.0126152	0.0340881	0.0319691	-0.0201446	-0.0467209	-0.00313811	0.0474939	0.0292445	-0.0369734	-0.0528329	0.0115605	0.0613596	0.0211537	-0.0577552
Gucd1_455.147	-0.0699299	0.0411365	-0.0751206	0.156813	0.0482971	0.0749477	-0.083312	-0.17734	-0.0311254	-0.138727	-0.0014905	0.062671	0.191507	0.144571	-0.157121	-0.1835	0.0665886	0.0769483	0.091114	0.0358099	-0.24921	0.0780649	-0.116563	0.100247	-0.000475616	0.000594684	0.000923964	-0.000157081	-0.00119867	-0.000529962	0.00111359	0.00129949	-0.000552367	-0.001885	-0.00046841	0.00196852	0.00173804	-0.00131236	-0.00286585	-0.000147457	0.00332797	0.0021697	-0.00268237	-0.00420476	0.0006869	0.00541689	0.0024271	-0.00503725
Tmem127_126.602	0.0884765	0.158463	-0.0736319	-0.611242	0.0783017	0.128818	0.0664967	0.0299676	-0.0880882	-0.345774	-0.0147767	0.325703	0.102244	-0.0479604	-0.277401	0.455322	-0.0610168	-0.0684006	0.225455	-0.800098	-0.0376506	0.128578	0.00229398	0.0922257	0.186084	0.185449	-0.0499633	-0.244429	-0.118223	0.128625	0.191631	0.0172715	-0.196966	-0.156341	0.0690396	0.180779	0.0681171	-0.141589	-0.173208	0.0126881	0.156778	0.102354	-0.0855329	-0.170751	-0.0358271	0.123688	0.120961	-0.0341159
Mrpl44_471.859	0.0534356	-0.00879562	0.0490199	-0.283149	0.0929637	0.0247069	0.00282023	0.0586295	0.0983336	-0.158748	-0.06701	0.0380097	0.128903	0.0121381	-0.196198	0.0960781	-0.0605129	0.184116	-0.0371982	-0.106631	-0.0156931	-0.122043	0.127513	-0.00776463	0.0107786	0.0205266	0.00293355	-0.0207839	-0.0181552	0.00971824	0.0265996	0.0085169	-0.0235943	-0.0264352	0.00692693	0.0334105	0.0165269	-0.0254768	-0.0368788	0.00164529	0.0406594	0.0275236	-0.0256473	-0.0496603	-0.00708991	0.0478238	0.0420626	-0.0230403
Gm14057_35.181	-0.010268	-0.00828131	0.0123699	0.0265312	0.0347396	0.0375315	-0.252942	0.0357599	0.0612092	-0.256133	0.193409	-0.0294061	-0.0495014	-0.0707194	0.168344	0.340652	-0.133831	-0.156086	-0.175871	0.187339	-0.0286323	-0.166814	-0.136509	0.194741	-0.00375282	0.010925	0.0105345	-0.00528807	-0.0144672	-0.00305961	0.0133754	0.0112812	-0.00746754	-0.0165934	-0.00202026	0.0162024	0.0118931	-0.0101438	-0.0188757	-0.00055211	0.0194369	0.0123026	-0.013397	-0.021288	0.00144066	0.0231058	0.0124256	-0.0173151
Smarcad1_1041.67	-0.0308063	-0.0680557	0.0440033	-0.0924251	0.0426668	0.0939047	-0.046743	0.210407	-0.0660992	0.118338	-0.0672651	-0.155228	0.019472	-0.0973264	-0.461966	-0.0873421	0.165512	0.300179	0.195196	0.0728741	-0.12153	-0.0697845	-0.0774741	-0.00305606	0.00466908	0.00419034	-0.00194724	-0.00628069	-0.00277154	0.00485909	0.00695472	3.59824e-05	-0.00784531	-0.00624718	0.00387323	0.0100563	0.00361484	-0.00852688	-0.010847	0.0010219	0.0129231	0.00909512	-0.00741856	-0.0162249	-0.00444317	0.0145872	0.0165073	-0.00337638
Orai2_291.039	0.0650792	-0.13445	-0.0394856	-0.149001	-0.0463001	-0.0343632	0.415668	0.219317	0.0954128	-0.412382	0.119922	-0.152402	-0.0635265	-0.0023859	-0.537713	-0.0176748	0.211685	0.191828	0.00806467	0.0266271	0.0922214	0.0273967	-0.0553037	-0.128479	0.0324248	0.126341	0.051803	-0.101153	-0.120833	0.0223208	0.124747	0.0606095	-0.0929557	-0.125386	0.0120846	0.122422	0.0689309	-0.0842747	-0.129105	0.00177847	0.119383	0.0767273	-0.0751763	-0.131966	-0.008534	0.115648	0.0839626	-0.065728
Nupl1_224.141	0.0417057	0.0604187	0.102087	-0.483225	0.023441	0.0781005	0.0564037	0.193777	-0.0718909	0.0475807	-0.0987031	0.0433394	-0.0129841	-0.0284844	-0.0839554	-0.0549825	-0.0454078	0.273394	-0.068244	-0.0708675	-0.0652426	-0.0182292	0.0490653	-0.00670316	0.14553	0.159287	-0.0194473	-0.166028	-0.090199	0.0742209	0.120119	0.017786	-0.098552	-0.0806631	0.0291695	0.0841213	0.0318641	-0.0537103	-0.0638955	0.00365443	0.0548215	0.0335166	-0.0255333	-0.046517	-0.0087248	0.0330006	0.0292669	-0.0089773
Osgepl1_184.04	0.0315165	0.0520942	0.00604879	-0.250322	0.0322302	-0.0482835	0.0328758	0.166725	0.0892775	-0.435553	0.15381	0.15528	-0.0232341	-0.116211	-0.22976	0.341442	0.0201452	0.0532262	0.0133034	-0.236894	-0.06865	-0.0630227	0.0886355	0.0307613	-0.0801506	0.124827	0.137453	-0.0433923	-0.167412	-0.0474397	0.117132	0.106388	-0.0544652	-0.138835	-0.0227762	0.10713	0.0797667	-0.0601468	-0.113167	-0.0046224	0.095841	0.0574305	-0.0617343	-0.0905907	0.00830504	0.0840478	0.0390936	-0.060343
Gtf2h4_669.8	0.0831864	0.003532	0.0747093	-0.263109	-0.11029	0.0441111	0.0284161	0.0119774	0.121405	0.0507149	-0.0456039	0.00758975	0.0657078	0.0232721	-0.180197	0.0301617	-0.00092827	0.0992201	-0.0816624	0.0182901	-0.136908	0.0332389	0.0600156	-0.00252861	0.0795183	0.0555419	-0.0510407	-0.114517	-0.0331515	0.100603	0.121808	-0.0177108	-0.177524	-0.125026	0.0957879	0.210746	0.0709593	-0.227414	-0.292181	0.0286403	0.306192	0.23309	-0.20969	-0.564979	-0.170114	0.372098	0.466005	-0.0452074
Trpt1_48.844	0.152474	-0.238772	-0.0622267	0.0703969	-0.116659	-0.0481703	0.0850016	0.235563	-0.174863	-0.369674	0.108893	0.0256079	0.301706	-0.0815773	-0.378714	-0.0321144	0.507736	-0.587565	0.444343	-0.244191	-0.114235	-0.0390809	0.070524	-0.0212645	-0.0101404	0.0125286	0.0179477	-0.00319148	-0.0213901	-0.00875056	0.017716	0.0194441	-0.00797592	-0.0258183	-0.00610808	0.0238135	0.020149	-0.0142629	-0.0302415	-0.00187431	0.0307588	0.0196687	-0.0222484	-0.0343206	0.0043116	0.0384029	0.0175235	-0.0320894
Arhgef40_284.816	0.0186936	0.0845814	-0.124742	0.113596	-0.204171	-0.149736	0.0517791	0.0674583	-0.00612899	0.00298391	0.00273589	0.162656	-0.0314132	0.163661	-0.53504	0.304052	0.0397313	-0.0402257	0.00308145	-0.336501	0.110026	0.0776523	0.0556338	-0.0546483	-0.0277679	0.0252058	0.0437854	-0.00282328	-0.0511979	-0.0254647	0.040328	0.0498221	-0.0163506	-0.0661973	-0.0187505	0.0591709	0.0534315	-0.0359667	-0.0819341	-0.00595416	0.0815768	0.0528047	-0.0630229	-0.096843	0.0147358	0.10691	0.0455494	-0.0988361
Rpl22l1_23226.568	-0.000794018	0.0785818	-0.114245	-0.0785849	0.0489608	0.0118193	0.0236482	0.0426824	0.0990675	-0.103944	0.030271	-0.068811	0.0712502	0.0196951	-0.0214401	-0.249214	0.0158968	0.105663	0.0159603	0.0467745	-0.0309307	0.03578	0.0580523	-0.0875106	-0.000627623	0.00446885	0.00343737	-0.00258531	-0.00524321	-0.000526369	0.0051835	0.00377511	-0.00313235	-0.00594206	-0.000382886	0.00600358	0.00413414	-0.00377855	-0.00672555	-0.000187421	0.00694341	0.00451321	-0.00454025	-0.00760257	7.16214e-05	0.00801904	0.00491022	-0.00543628
Cnot11_222.821	0.0336116	0.0314601	-0.0898167	-0.0805678	0.0264182	0.0217575	0.0192502	0.00755131	0.11819	-0.191997	0.0194316	0.144595	0.0701083	-0.0688515	-0.316836	0.142408	0.03255	0.0593553	-0.0665283	0.0341744	-0.0425036	0.043227	-0.00787159	-0.0181158	0.0381537	0.0552378	0.000669481	-0.0575933	-0.0411234	0.0281789	0.0598263	0.0142901	-0.0525654	-0.0518906	0.0161109	0.0616364	0.0278145	-0.0445179	-0.0606045	0.00241418	0.0604283	0.0405565	-0.0337424	-0.0666523	-0.0123256	0.056086	0.0518483	-0.0206947
Sdhaf2_1575.394	0.0427176	0.0255142	-0.000501788	-0.135506	0.0313476	-0.0428464	0.0581159	0.00672339	-0.0354718	-0.126477	0.0240384	0.0138136	-0.07095	0.0178087	0.250017	0.23343	-0.0731568	-0.108565	-0.131948	-0.0487969	-0.121611	0.00133046	0.0213218	0.0891776	-0.010543	0.0188817	0.0245078	-0.00776778	-0.035462	-0.0125072	0.0345691	0.0366248	-0.019653	-0.0586856	-0.0121897	0.0613117	0.0530176	-0.0433468	-0.0957697	-0.00583062	0.105555	0.0736981	-0.0891289	-0.154377	0.0138945	0.176293	0.0969242	-0.176659
Polr2g_2719.868	-0.0451595	0.0412795	0.092166	-0.104379	0.0336957	-0.062032	0.0373395	0.018053	0.0486782	-0.0606223	-0.0653292	-0.0948576	-0.0154791	0.0161554	0.113412	0.157008	-0.0320335	0.0469965	-0.0883953	-0.000310115	-0.0956847	-0.0703715	0.0135837	0.0751478	-0.0377599	0.0533283	0.0579178	-0.014855	-0.058029	-0.0171365	0.038103	0.033725	-0.0146433	-0.0364117	-0.0064275	0.026413	0.0189755	-0.0124116	-0.0224703	-0.0012071	0.0178482	0.010237	-0.00969798	-0.0136138	0.00106241	0.0117925	0.00521533	-0.0071898
Rspry1_1177.575	0.0885337	0.0277764	-0.209436	-0.0427003	-0.0583078	-0.100114	0.128177	0.0819532	0.134407	-0.128805	0.165431	0.0179044	0.17141	0.0337772	-0.51118	-0.205863	-0.00304279	-0.124157	0.16558	0.106422	0.144214	0.143128	-0.0675769	-0.16029	0.0283498	0.0137335	-0.0183403	-0.0289685	-0.00431974	0.0256327	0.0248779	-0.00637489	-0.0310664	-0.0181958	0.0168505	0.0316863	0.00827766	-0.0263421	-0.0296656	0.00318934	0.0322015	0.0226044	-0.0151381	-0.0357691	-0.0129247	0.0255881	0.0334097	0.000648747
Arl6ip6_95.969	-0.0650609	0.147202	-0.141851	-0.0684376	-0.00856129	0.0747765	0.109899	0.0550627	-0.205212	-0.104067	-0.0479685	-0.0888966	0.295083	0.145555	-0.462746	-0.225303	0.514838	0.0859932	-0.0851703	-0.182182	-0.0481822	0.010348	-0.0194552	0.0237119	0.0470342	0.0536573	-0.0112236	-0.0709076	-0.0411481	0.0449837	0.0778345	0.0105004	-0.0829756	-0.0753484	0.0328606	0.103098	0.0442584	-0.0866856	-0.119032	0.0058437	0.12558	0.0910123	-0.0755602	-0.170209	-0.0418518	0.139529	0.149841	-0.0422322
Wdpcp_63.367	0.0867053	-0.018722	-0.0676112	-0.085518	-0.0349466	-0.0678362	0.205345	-0.106111	0.133872	-0.114462	-0.084679	0.298929	-0.056655	-0.0415786	-0.0798588	-0.0409734	-0.0249857	-0.0106293	0.0126264	0.00913908	0.0125262	0.010232	0.00124397	-0.0154504	0.0297608	0.0718503	0.0194566	-0.05563	-0.0535992	0.0160446	0.0570353	0.0222263	-0.0392066	-0.0457612	0.00648056	0.0444487	0.0226826	-0.0267628	-0.0382138	9.71712e-05	0.0339858	0.0216689	-0.0174916	-0.0312922	-0.00391167	0.0254609	0.019793	-0.0107174
B3gnt2_1076.471	-0.0520438	0.0215842	0.0161113	-0.129098	0.122323	0.111623	0.0323758	-0.0335121	0.0198021	-0.103863	0.0178382	-0.0696983	0.0188279	-0.150458	-0.104123	0.10478	0.109464	0.0908907	0.00550387	0.0519784	-0.101914	0.00334288	-0.0654879	0.0321334	0.036743	0.0227746	-0.0219266	-0.0431445	-0.0108636	0.0368456	0.0413515	-0.00651071	-0.0516534	-0.0344467	0.0271922	0.0579487	0.0180004	-0.0503057	-0.0609345	0.00528124	0.0673726	0.0492554	-0.0346184	-0.0844414	-0.0296229	0.0637507	0.0821761	-0.00220167
Irf2bp2_560.458	0.248266	-0.148972	-0.0444494	-0.448784	-0.157487	0.0613567	0.104521	0.397874	0.0833212	0.037701	0.143879	0.0584565	-0.149877	-0.350223	-0.479674	-0.00868452	0.0751187	0.119991	0.209903	-0.233832	0.174013	0.0851215	0.0804555	-0.229869	0.0381863	0.114841	0.0398635	-0.103684	-0.116156	0.0302229	0.133714	0.0618544	-0.110571	-0.147611	0.0176294	0.153546	0.0890557	-0.11468	-0.184884	-0.000921766	0.173831	0.122025	-0.114692	-0.228622	-0.0270841	0.193871	0.161227	-0.109006
Gtpbp1_313.174	-0.00418757	0.0146087	-0.0406772	-0.0906065	0.0353939	0.105862	-0.0364684	0.102143	0.0124575	-0.201526	-0.0170289	0.127062	-0.0598626	-0.0692895	-0.141951	0.108948	0.0677983	0.132344	0.0361007	-0.358292	0.197225	-0.102282	0.139456	-0.0785213	0.00409667	0.0389855	0.0215818	-0.0290955	-0.0435641	0.00302635	0.0481527	0.0288987	-0.034611	-0.0557033	0.00114622	0.0593126	0.0384235	-0.0409777	-0.0711528	-0.0018832	0.0728452	0.0507548	-0.0482575	-0.0908283	-0.00652225	0.089184	0.0666296	-0.0564852
Mrps25_241.869	0.00754719	0.0152091	0.171094	-0.271584	-0.0122459	-3.17542e-05	-0.00102356	0.0181548	0.0405366	-0.0331023	-0.0126386	0.0411864	0.103361	-0.0933544	-0.0993798	0.144054	-0.0109016	0.0459272	-0.0299901	-0.00233124	-0.185608	0.0444435	-0.002535	0.0549347	-0.0250246	0.0648053	0.0600391	-0.0280216	-0.0758193	-0.0159715	0.0595968	0.0489161	-0.0294953	-0.0652046	-0.00877424	0.0543141	0.0393241	-0.0299469	-0.0557066	-0.00313465	0.0490889	0.0311205	-0.0296112	-0.0472666	0.00120452	0.0440214	0.0241642	-0.0286855
Ccnd2_1448.35	0.0402166	-0.0573378	-0.0127599	-0.649825	0.563138	-0.187068	0.266264	0.211006	0.116289	-0.763447	0.0271427	-0.0825317	0.131475	0.115705	-0.475389	0.00715951	0.255888	0.0965403	0.204307	-0.510747	-0.044895	0.158578	-0.0461774	-0.0661425	-0.00517129	0.0778135	0.054485	-0.049048	-0.0907413	-0.00508867	0.0855938	0.059369	-0.0546108	-0.0999776	-0.00493725	0.0941225	0.0646744	-0.0608091	-0.110185	-0.0047041	0.103466	0.070435	-0.067718	-0.121474	-0.0043744	0.113696	0.076687	-0.0754222
Aqp8_43.325	-0.109401	0.51606	-0.519974	-0.0107312	-0.449996	-0.292339	0.115385	0.120289	0.218813	0.130515	0.329582	0.149195	0.211365	-0.256793	-0.751501	-0.844095	-0.434444	0.527422	0.170825	0.258161	0.177569	0.218472	-0.273312	-0.252474	0.0722352	0.0680732	-0.0258011	-0.0973399	-0.0457388	0.0645056	0.0955676	0.00544176	-0.105114	-0.0862669	0.0433001	0.118269	0.0469881	-0.0982512	-0.129686	0.0061449	0.131108	0.0956619	-0.0724166	-0.169539	-0.0482711	0.12852	0.146349	-0.0254608
Zfp930_407.913	-0.0861034	0.0569738	-0.0935807	0.0146479	-0.0168851	0.0898939	0.139701	0.0551576	0.000516154	-0.116033	-0.128579	-0.0566683	0.0989365	0.0553116	-0.0870768	-0.611343	0.26805	0.144136	0.0708338	0.10144	0.0245877	0.028577	-0.0216429	-0.125233	0.0133002	0.0235148	0.00311946	-0.0211159	-0.0174124	0.00860868	0.0225544	0.00704509	-0.0174355	-0.0187946	0.00416294	0.02087	0.010211	-0.0135613	-0.0192941	0.000100788	0.0186125	0.0125962	-0.00966506	-0.0190011	-0.00347048	0.0159354	0.014211	-0.00589702
Lactb2_2747.223	0.00110883	-0.00945838	-0.0181648	-0.0662139	-0.00117342	0.00371442	0.114632	0.0575833	-0.0231817	-0.0633971	0.0389687	0.0185368	0.0850992	-0.0913806	-0.256684	-0.234568	0.121935	0.274112	0.0478125	-0.0364577	0.00763342	0.0221103	-0.0554586	-0.0276502	0.0237296	0.0112739	-0.019323	-0.0311013	-0.00376912	0.0338179	0.0344111	-0.0110252	-0.0531639	-0.0330916	0.0343719	0.0689757	0.019841	-0.0702387	-0.0875513	0.00857274	0.107168	0.0852307	-0.0593768	-0.167931	-0.0707895	0.126669	0.188409	0.0161836
Wrn_52.44	-0.22356	0.0226212	0.152987	-0.103474	0.0152763	0.325006	-0.233413	0.12524	-0.405462	-0.111572	-0.133219	0.293283	0.141802	-0.397438	-0.726765	0.646763	0.0885854	0.321732	-0.490935	0.289612	-0.0929344	-0.235338	-0.0166421	0.0109427	0.0575554	0.0704371	-0.00878625	-0.08568	-0.0534593	0.0485581	0.0895886	0.0161019	-0.0888367	-0.0835673	0.0308821	0.105481	0.0473377	-0.0828367	-0.115408	0.00313182	0.115406	0.0834481	-0.0652737	-0.145783	-0.0356328	0.116331	0.12206	-0.034497
Golga7_8350.291	-0.0414496	0.005663	0.0586257	0.0511281	-0.0834031	-0.00698274	0.0482491	-0.0286024	-0.00945848	-0.121456	0.053734	0.0552213	0.0943969	0.0154144	-0.193352	-0.0161901	0.0656357	0.0640061	0.00804005	-0.02339	-0.053274	0.0473571	-0.0429477	0.018341	-0.0201305	0.0524068	0.0528222	-0.0248142	-0.0745009	-0.017761	0.0656384	0.0584524	-0.0362868	-0.0883467	-0.0136076	0.0813413	0.0638343	-0.0510397	-0.104061	-0.0071283	0.0998092	0.0686359	-0.0698489	-0.121719	0.00232657	0.121329	0.0724146	-0.0936681
Snx11_51.042	-0.00409266	0.0153854	0.0303589	-0.0331772	-0.0616399	-0.0326263	0.0497564	0.0462972	0.0101861	0.00306392	-0.0926011	0.00658369	-0.00482699	-0.0195471	-0.0350088	0.0356872	-0.0382834	0.219236	-0.0525592	0.110288	-0.12519	-0.136761	-0.146479	0.192425	0.000160077	0.066934	0.0425093	-0.0437443	-0.0733755	-0.000972391	0.0710749	0.0462993	-0.0457974	-0.0789331	-0.0022622	0.0754468	0.0503904	-0.0479145	-0.0849026	-0.00372564	0.0800603	0.054804	-0.050094	-0.0913151	-0.0053805	0.0849264	0.0595626	-0.0523339
Armc1_1912.548	-0.00530916	0.0359336	0.0345319	-0.0765977	-0.00098172	-0.083001	0.0136594	0.00850847	0.0671756	-0.0344011	-0.0100533	0.0301735	0.0820231	0.127406	-0.127561	-0.0612444	-0.0886447	0.0131652	-0.0778993	0.0581675	-0.0105855	0.153064	-0.0305697	-0.0553516	-0.000438938	0.0206475	0.0136228	-0.0131283	-0.022824	-0.00071977	0.0230673	0.0154608	-0.0145331	-0.025701	-0.00106254	0.0257655	0.0175411	-0.0160845	-0.0289414	-0.00147816	0.0287733	0.0198949	-0.0177973	-0.032592	-0.00197931	0.0321252	0.022557	-0.0196877
Mccc2_700.472	0.0485513	-0.0527325	0.0295851	-0.106405	0.0914675	-0.128749	-0.0489471	0.0215638	0.143164	-0.104605	0.00478633	0.188246	0.102176	-0.0322361	-0.468687	0.101247	0.0390695	0.0676167	0.0379733	-0.0490336	-0.161029	0.162236	0.0704696	-0.0978684	-0.00772676	0.0103159	0.0145581	-0.00285364	-0.0179967	-0.00739313	0.0153847	0.0171731	-0.0069752	-0.0234213	-0.00598587	0.0220452	0.0195643	-0.0130647	-0.029781	-0.00295498	0.0305827	0.0213127	-0.0217549	-0.0369654	0.00242201	0.0412549	0.0217938	-0.0338159
Ric8_3286.676	-0.0627881	0.115083	-0.0810247	-0.0895603	0.0463397	-0.0523104	0.0815	0.0774876	0.0786009	-0.265598	0.114065	-0.0950336	0.111958	0.176088	-0.303407	-0.421002	0.162416	0.225525	0.121761	0.0636212	-0.215832	0.0606628	-0.020986	-0.0308563	0.0115623	0.0167878	-0.000146964	-0.0186347	-0.0136173	0.0101076	0.0221157	0.00544015	-0.0203989	-0.0210972	0.00655158	0.0274303	0.0132922	-0.0204392	-0.0298954	0.00020732	0.0320464	0.0235817	-0.017822	-0.0395727	-0.00963721	0.0350066	0.0362559	-0.0114763
Smad3_788.616	-0.0191692	0.010456	-0.097808	-0.100344	0.102487	-0.00705748	0.115387	0.130068	-0.034974	-0.248344	0.0514008	0.140195	0.0252085	0.0351329	-0.529836	-0.0125712	-0.118577	0.227346	0.182538	-0.289758	0.359306	0.0288004	-0.075008	-0.131572	0.0490629	0.0474487	-0.0175505	-0.0686283	-0.0335623	0.0473842	0.0725593	0.00496254	-0.080644	-0.0685066	0.0339815	0.0975623	0.0404155	-0.081853	-0.111871	0.00374916	0.117136	0.0886045	-0.0648831	-0.159241	-0.0486625	0.123854	0.146493	-0.0225266
2810002D19Rik_175.77	0.00456797	0.0781057	0.0291273	0.0705371	-0.185175	-0.281133	-0.0377741	-0.0311976	-0.00286896	0.051218	0.0649381	0.0800013	0.521419	-0.0118507	-0.226233	-0.292405	0.0155011	-0.00736776	-0.229965	0.170712	-0.0931598	0.037212	0.0855475	-0.0424899	-0.022192	0.00542552	0.0249312	0.00701457	-0.0222716	-0.0183235	0.0133493	0.02503	-0.00104207	-0.0264794	-0.0121027	0.0205546	0.0224466	-0.00981342	-0.028204	-0.00400267	0.0262116	0.0171883	-0.0184177	-0.0270097	0.00525764	0.0295824	0.00954059	-0.0258897
Mettl6_366.356	-0.0295786	0.0231949	0.108593	-0.124724	0.0100942	-0.222596	0.103352	0.161902	0.0649996	0.0321563	-0.0451175	-0.146336	0.0442954	0.0134436	-0.0978366	-0.077362	0.0598784	0.1228	-0.071718	-0.00029526	-0.00320565	0.0535869	0.00103048	-0.0459412	-0.0479971	0.0100794	0.05434	0.0172131	-0.0510534	-0.0445492	0.0308126	0.0611712	-0.0014621	-0.068869	-0.0329214	0.0540501	0.0612549	-0.0271431	-0.0825566	-0.0121205	0.0771827	0.0521011	-0.0586621	-0.088267	0.0176585	0.0968211	0.0315265	-0.0933868
Il4ra_378.687	0.0385069	0.0464333	0.0335792	-0.22178	0.0296226	0.0279175	-0.0113779	-0.0339038	-0.119909	0.0220687	0.147736	0.0683172	0.0167627	-0.0687748	-0.00926175	0.0605182	0.0191756	0.0676113	0.00465723	-0.342184	0.0257239	0.0863868	-0.0103336	0.0432387	0.0874817	0.0591475	-0.0442521	-0.0971714	-0.0292185	0.0699022	0.0817996	-0.00668922	-0.0921611	-0.0635783	0.0406874	0.0910708	0.0309308	-0.0716014	-0.0877527	0.00414722	0.0857113	0.0625911	-0.0394652	-0.0971752	-0.0339724	0.0664836	0.0835791	-0.00163825
Rab11b_154.439	0.0838606	-0.0727234	-0.0358159	-0.0298186	-0.0350989	0.0762288	-0.218841	0.201213	-0.0342828	-0.250399	0.172532	0.0109267	0.0524819	0.255135	-0.452435	0.178474	0.120266	-0.18216	0.082739	-0.105491	-0.19818	0.1758	-0.0147282	0.00348415	-0.00426893	0.010263	0.0107436	-0.00450211	-0.0143188	-0.00381075	0.0128773	0.0118393	-0.00666083	-0.0168265	-0.00300895	0.0159822	0.0128708	-0.00940067	-0.0196209	-0.00176135	0.0196402	0.0137692	-0.012839	-0.0226976	5.54825e-05	0.0239147	0.014444	-0.0171115
Slc35c2_383.384	0.00276872	-0.00567255	0.03124	-0.183967	-0.00837574	0.089412	-0.0522458	0.0854416	0.157281	-0.0891101	-0.0456644	0.109167	-0.003231	0.0680983	-0.451788	-0.251031	0.0312866	0.265599	0.269695	-0.13223	0.0239666	0.010543	-0.0606709	-0.0423944	0.00257765	0.020683	0.0115232	-0.0171393	-0.0262446	0.00226619	0.032682	0.0204206	-0.0257053	-0.0434887	0.000606147	0.0513183	0.035661	-0.0382283	-0.0720411	-0.00392839	0.0799691	0.0614023	-0.0563047	-0.119633	-0.0142387	0.123433	0.104156	-0.0819875
Tspan13_177.615	0.140941	0.0839722	0.146777	-0.352645	-0.139212	-0.223185	-0.0559216	-0.278077	-0.0963782	0.0437128	0.196185	0.119263	0.129332	-0.0318957	0.302816	0.472539	0.12127	-0.214405	-0.43965	-0.45152	-0.344249	-0.158269	0.226682	0.301826	0.00732463	0.0107722	-0.000212178	-0.0127129	-0.00947078	0.00738407	0.0164786	0.00412078	-0.0160831	-0.0171079	0.00545832	0.0236425	0.0118714	-0.0185431	-0.0281458	-3.70882e-05	0.0318274	0.0244588	-0.0184299	-0.0431567	-0.011417	0.0398745	0.0434181	-0.0130518
Tbl1x_1209.14	0.00150784	-0.0651545	0.0062209	-0.270256	0.0561405	0.17953	0.131206	0.174311	0.0972082	-0.154791	-0.0405703	0.0925084	-0.201552	-0.139384	-0.434121	-0.00372353	-0.0324312	0.158075	0.235605	0.00237766	0.254207	-0.0328785	-0.0472025	-0.181697	0.0726947	0.0998441	0.0010737	-0.0993974	-0.0684558	0.0434281	0.0899561	0.0221884	-0.0734067	-0.0717572	0.0188891	0.0765078	0.0356247	-0.0496794	-0.0688657	-0.000385212	0.061371	0.0427054	-0.0292756	-0.0617512	-0.014382	0.0460395	0.0447693	-0.0126794
Pcyt1a_317.193	0.0444462	0.0586753	0.0489206	-0.329651	-0.081313	0.234184	0.0176141	-0.128871	0.0449432	-0.262511	0.116952	0.149595	0.0139643	0.0857876	-0.219946	0.163021	0.095431	-0.139292	0.166901	-0.353675	0.0999512	-0.0885399	-0.125911	0.176704	0.232718	0.106695	-0.136396	-0.200247	-0.027616	0.13003	0.116861	-0.0252343	-0.124974	-0.0677197	0.0508587	0.0899453	0.0240822	-0.0610323	-0.0651435	0.00354152	0.0546567	0.0370545	-0.0193088	-0.0459744	-0.0169933	0.0252407	0.032237	0.00245616
Psmg2_3234.288	-0.0425927	0.0294616	-0.011479	-0.107932	0.0799357	0.00735278	0.105941	0.0861285	0.0629546	-0.162885	-0.0304619	-0.0172681	0.0142685	-0.0602228	-0.106472	-0.0724158	-0.0309158	0.181552	0.0389448	0.00162583	-0.0136294	0.101143	-0.00298522	-0.101405	0.0304026	0.0567808	0.0090357	-0.0536011	-0.0466091	0.0214427	0.0604293	0.0208413	-0.0490002	-0.0559824	0.0107454	0.0620317	0.0327886	-0.0420086	-0.0639754	-0.00144804	0.0613452	0.0444217	-0.0327215	-0.0701105	-0.0148098	0.0581857	0.0552672	-0.0213414
Nfil3_271.423	0.197603	-0.176218	-0.42728	-0.81658	-0.0241002	0.0664935	0.389136	0.492254	0.421713	-0.0281559	0.154206	-0.152719	-0.270864	-0.653521	-1.67491	-0.901176	0.276953	0.719174	0.417307	0.508613	0.205549	0.0189701	-0.371917	-0.496047	0.0894133	0.0580947	-0.0545641	-0.114134	-0.0311646	0.0932454	0.109123	-0.0136894	-0.143813	-0.100843	0.069976	0.157951	0.0565809	-0.144654	-0.188961	0.00701078	0.189177	0.150253	-0.097155	-0.277929	-0.107524	0.183001	0.251919	0.00988222
Ankmy2_65.165	-0.123151	0.043572	0.0127798	-0.399499	0.196892	0.0536007	0.285323	0.0850194	0.356951	-0.483955	-0.389668	0.057242	0.114796	0.0333134	-0.798463	-0.0998761	0.187667	0.366912	0.193515	-0.00561951	-0.222031	0.137927	0.0448325	-0.235321	0.00618927	0.0782743	0.0457517	-0.0571575	-0.0899391	0.00280778	0.0928633	0.0591489	-0.0649973	-0.111336	-0.00227685	0.109796	0.0758437	-0.0734215	-0.137696	-0.00963071	0.129349	0.0965149	-0.0822968	-0.170218	-0.0199897	0.151805	0.12194	-0.0914018
Ptbp3_1636.613	0.033066	-0.0751524	0.0414709	-0.15245	-0.0608455	0.128884	0.095453	0.139248	-0.0686498	-0.0552766	-0.0197343	0.0199217	0.0304065	0.0687665	-0.52868	0.0645103	0.000554247	0.137443	0.108063	-0.0398662	0.0348887	0.122116	-0.100726	-0.0660088	0.0535175	0.0509586	-0.0163628	-0.0660797	-0.0322601	0.0408045	0.0618665	0.00548173	-0.0610354	-0.0511764	0.0225774	0.0662896	0.0275159	-0.0485614	-0.065266	0.00049167	0.0634318	0.0472561	-0.0298771	-0.0724623	-0.0232023	0.0531916	0.0624413	-0.00700679
Kctd10_2559.223	-0.0018912	0.070786	0.0654644	-0.0893391	-0.00828018	-0.0407386	-0.100423	-0.025797	-0.171706	-0.0206546	0.0772491	0.0898918	0.0729963	0.0880967	-0.0432457	0.251948	0.0874499	-0.0916237	-0.0761659	-0.264838	-0.0825782	-0.105812	0.062224	0.156532	0.00718443	0.0157091	0.00347712	-0.0144299	-0.0139077	0.00550537	0.0185092	0.00725846	-0.0147709	-0.0182345	0.00285212	0.0211497	0.0119496	-0.0142826	-0.0229882	-0.000967859	0.0234055	0.0175782	-0.0126929	-0.0280186	-0.00614571	0.0249943	0.0241221	-0.0097035
Gm14680 /// Sms_1418.607	-0.0571355	0.0207581	-0.023852	-0.0730754	0.0672884	0.124121	0.00414956	0.0821649	0.0765521	-0.175679	-0.0527914	-0.0528713	0.0612236	-0.000102783	-0.143655	-0.190838	-0.0369796	0.216685	0.128995	0.0631882	-0.0254649	0.011037	-0.0376321	-0.0603562	0.01838	0.00984217	-0.0127862	-0.0222625	-0.00424114	0.0214655	0.0230247	-0.00498171	-0.0310575	-0.020573	0.017619	0.037883	0.0123193	-0.0337065	-0.0430688	0.00198681	0.0492865	0.0397751	-0.0231682	-0.0671109	-0.0297764	0.048991	0.0740553	0.00764358
Mark4_81.062	0.0807193	-0.0600111	0.148824	-0.234579	-0.19383	0.0583093	0.118968	-0.00557345	0.0885474	-0.236707	0.118435	0.107499	0.158534	-0.0151424	-0.156089	0.0624575	-0.0512999	-0.204569	-0.040173	-0.089411	0.121595	0.206537	-0.033127	-0.0889502	0.0180653	0.143708	0.0758766	-0.100815	-0.144136	0.00773483	0.131804	0.0776147	-0.0860188	-0.136432	-0.00128273	0.120352	0.0784366	-0.0726259	-0.128569	-0.00907579	0.109389	0.078464	-0.060543	-0.120646	-0.0157338	0.0989451	0.0778077	-0.0496804
Alkbh5_3315.47	0.0243534	-0.0726023	0.0821445	0.0335234	-0.00553787	0.0162812	-0.0806478	-0.116819	-0.104134	-0.0292843	-0.0540463	0.0258867	0.0160499	-0.0321387	0.235556	0.399038	0.0243277	-0.175659	-0.143899	-0.130158	-0.167446	-0.127026	0.0766464	0.158296	-0.000826933	0.004416	0.00397068	-0.00273391	-0.00670142	-0.00115166	0.00737011	0.00634816	-0.00475927	-0.0109954	-0.00154915	0.0122796	0.0101273	-0.00825907	-0.0180428	-0.00197724	0.0204165	0.0161154	-0.0142979	-0.0296284	-0.00230863	0.0338499	0.0255648	-0.0247156
Rhot2_398.833	0.00768148	0.00414564	0.144695	-0.317764	0.00905748	0.0361955	0.133153	-0.0545546	0.00875623	-0.115846	0.0437029	0.0924334	-0.0276509	0.183243	-0.405756	0.170843	0.0238401	-0.100196	0.100573	-0.135576	0.0393579	0.0344412	0.0127941	-0.0335175	0.0616274	0.103352	0.0131136	-0.0948542	-0.0763562	0.0356188	0.0912972	0.0294452	-0.0701705	-0.0761834	0.0141933	0.0772677	0.0396423	-0.0482582	-0.0715676	-0.00254388	0.0625302	0.0448365	-0.0296117	-0.0639908	-0.0147942	0.0480784	0.0461005	-0.0143871
Xrcc4_222.303	0.0291375	0.0960909	-0.0189107	-0.196722	0.10731	-0.106522	-0.125796	0.128761	-0.0682779	-0.104829	0.143444	0.123978	0.138235	-0.0861427	0.00356579	-0.114954	0.0907565	-0.0122206	-0.100954	0.0403921	-0.0278629	-0.165053	0.0606184	0.0784593	0.0150397	0.032832	0.0077264	-0.0260386	-0.0243606	0.00811734	0.0275539	0.0106593	-0.0189766	-0.0225101	0.00286518	0.022486	0.0121652	-0.0131178	-0.0200809	-0.000950246	0.0178172	0.0126036	-0.00838787	-0.0173738	-0.00356673	0.0136611	0.0122769	-0.00467866
Per2_42.552	-0.950495	-0.362036	-0.135959	-0.0773678	0.64986	0.968451	0.913211	0.0382904	-0.334049	-0.661343	-1.37484	-0.793856	-1.42894	-0.5954	-0.657338	0.398936	0.354485	0.46019	0.998509	0.0108833	0.292806	-0.142762	-1.07134	-0.376197	0.464146	0.231771	-0.310375	-0.492523	-0.0708878	0.2746	0.255911	-0.0518824	-0.304223	-0.167008	0.112183	0.203788	0.0602594	-0.147472	-0.163662	0.00534335	0.128924	0.0912645	-0.0458711	-0.117444	-0.0450715	0.0616288	0.0813208	0.00794431
Hoxb3_159.913	0.00729357	0.0263374	0.042766	0.0481715	-0.272206	0.0394281	0.0273221	0.011422	-0.0332872	-0.0276753	-0.0488295	0.258782	-0.00220357	-0.106457	-0.120316	0.0488083	0.136109	0.122782	-0.115509	-0.109944	-0.06901	-0.0375656	0.0121942	0.0745029	0.0533365	0.0908735	0.0120451	-0.082908	-0.0675613	0.0312115	0.0814803	0.0266557	-0.0624395	-0.0684352	0.0125144	0.0700324	0.0362385	-0.043714	-0.0653414	-0.00251362	0.0575888	0.0415566	-0.0273074	-0.0594216	-0.0138875	0.0450208	0.0433859	-0.0135142
Mrs2_166.23	0.183607	-0.0925953	0.0752334	-0.401682	-0.040986	0.0723589	0.13628	-0.0608991	-0.15451	0.132871	-0.0576824	0.140389	0.0317281	0.01675	-0.143072	0.331635	-0.147225	0.0533666	-0.348571	0.0315487	-0.171367	0.19195	-0.0653689	0.0631883	0.120674	0.0996979	-0.0432092	-0.13408	-0.0547991	0.0786256	0.105652	0.00439172	-0.103268	-0.0792132	0.0366432	0.0962245	0.0375145	-0.0671056	-0.0861904	0.000295136	0.0766658	0.0562488	-0.0322706	-0.0793354	-0.0268019	0.0520601	0.0623584	-0.00310875
Pign_313.563	0.072398	-0.0740929	-0.0132184	-0.12473	0.0650998	-0.0126499	-0.0707861	0.256406	-0.0234072	-0.250185	0.195386	-0.0304218	0.0541703	0.0530638	-0.351576	0.00201427	0.041186	0.190515	-0.103428	0.0161364	-0.037294	0.0878264	-0.067959	-0.00962211	-0.00316564	0.0388531	0.0277941	-0.0231225	-0.0440538	-0.00367509	0.0418214	0.030192	-0.0247564	-0.0477033	-0.00424588	0.0450113	0.0327921	-0.0265037	-0.0516588	-0.00488458	0.0484386	0.0356107	-0.028372	-0.0559468	-0.00559844	0.0521204	0.0386655	-0.0303697
Hif1an_60.743	0.369203	-0.321958	-0.135101	-0.166615	-0.100403	0.0573659	-0.121964	0.286559	-0.106456	-0.212749	0.153778	0.113046	0.140318	-0.489201	-0.0357282	0.503852	-0.337381	0.261783	0.15189	-0.574569	0.0789352	-0.373112	0.0909723	0.182187	0.0614476	0.0320173	-0.038486	-0.0648919	-0.0122745	0.0538222	0.0553754	-0.0106129	-0.0675529	-0.0428082	0.0330115	0.0681292	0.0217905	-0.0544724	-0.0667813	0.002098	0.0666075	0.051622	-0.0275411	-0.0774749	-0.0331075	0.0497195	0.0721009	0.00776344
Yipf4_7403.096	0.030921	-0.0483651	0.0520299	-0.0799515	-0.0276928	-0.0199872	0.112445	0.0387473	-0.0181532	-0.0546134	0.0147686	0.0617837	-0.0111923	-0.112447	-0.0855126	0.0667138	0.0312828	0.0579155	0.0606037	-0.135857	0.0373418	0.0154252	-0.0165063	2.11354e-05	-0.00794027	0.0420397	0.0337642	-0.0223352	-0.0489385	-0.00712568	0.0436059	0.0339306	-0.0238859	-0.0500851	-0.00625883	0.0452048	0.0340665	-0.0254943	-0.051235	-0.00533797	0.0468364	0.0341701	-0.0271619	-0.052387	-0.00436133	0.0485006	0.0342395	-0.02889
Anxa4_22905.23	-0.0115927	-0.0307252	0.0673346	0.060973	-0.0182293	-0.00442678	-0.0403084	-0.102418	-0.0657286	0.00282367	-0.0520566	0.0584975	-0.0741155	0.0355562	0.113018	0.244917	0.0651168	-0.120367	0.0232688	-0.167205	-0.129244	-0.0743572	0.00919177	0.13968	-0.00392783	0.000832802	0.00425562	0.00128353	-0.00355535	-0.0030152	0.00199937	0.00393858	-1.91579e-05	-0.00388682	-0.00189683	0.00287313	0.00327578	-0.00120667	-0.00381971	-0.000697357	0.00339733	0.00236009	-0.00217607	-0.00339543	0.000462104	0.00355324	0.00130027	-0.00285407
Gpsm3_174.434	-0.0133278	0.171744	-0.0515326	-0.591503	0.198249	-0.0833299	0.258085	0.142663	-0.251803	-0.264339	0.320218	-0.150906	0.276533	0.286522	-0.8901	0.115391	0.0147414	0.040048	-0.233811	0.0278926	0.263965	-0.0603692	0.000382164	-0.121288	0.211545	0.10069	-0.128941	-0.198011	-0.0301507	0.13488	0.126917	-0.0257066	-0.143509	-0.0824062	0.0595042	0.112095	0.0334232	-0.0799653	-0.0912179	0.0024417	0.0779511	0.0568903	-0.0275674	-0.0737467	-0.0301651	0.0406394	0.0562907	0.00663101
Sh3bgrl3_1475.132	-0.0398417	0.0969337	-0.0663083	-0.0134275	-0.00121291	-0.0446204	0.100287	0.0825111	-0.110183	-0.0957915	0.0417747	0.0627944	-0.0316604	-0.0403242	-0.0335113	0.0612611	0.00973587	0.0327934	0.090306	-0.137245	-0.040991	0.0137483	0.0358194	-0.00749385	0.0178321	0.0802237	0.0346533	-0.0537606	-0.0660053	0.00757125	0.0617071	0.0319802	-0.0373684	-0.0531365	0.000910339	0.0469564	0.0285684	-0.025431	-0.0423737	-0.00317822	0.0353394	0.0248982	-0.0168246	-0.0334899	-0.00547195	0.0262901	0.0212759	-0.0106976
Il15_447.385	0.000500892	0.00258494	0.0559675	0.0810603	-0.0722623	-0.0539711	-0.0759833	-0.0697454	-0.077038	-0.227196	0.1095	0.00471765	0.226667	0.224307	0.0356024	-0.131793	0.137174	0.0110645	-0.0746842	-0.131067	-0.259017	-0.0239372	0.00697908	0.176226	0.0047713	0.00681842	-0.00014699	-0.0077275	-0.00567142	0.00428167	0.0094996	0.00243435	-0.00877807	-0.00935097	0.00268046	0.0123333	0.00636376	-0.00897424	-0.0139154	-0.000521813	0.0149192	0.0118631	-0.00768612	-0.0191579	-0.00587334	0.0166256	0.019024	-0.00411946
Actr1b_791.505	-0.0237821	0.128504	-0.013684	-0.0456139	-0.0757362	-0.182202	0.0301458	0.00136056	0.0695065	-0.233056	0.174415	0.112952	0.233856	0.157704	-0.310499	-0.118699	0.00227344	-0.125728	0.115939	-0.244302	0.110273	0.109218	0.0368801	-0.0702243	0.00792851	0.0494712	0.0248859	-0.0365441	-0.0511857	0.00441325	0.0546086	0.031984	-0.0373382	-0.0596064	-0.000152158	0.059854	0.0401949	-0.0374699	-0.0689233	-0.00595004	0.0651189	0.049615	-0.0367595	-0.0791632	-0.0131863	0.0702925	0.0603366	-0.0350009
Afmid_210.514	0.0334314	-0.0126343	-0.0550029	-0.00179291	-0.106735	-0.0140192	0.236559	0.0280121	-0.00503665	-0.305769	0.0273841	-0.0723365	0.131157	0.151265	-0.303799	0.28618	0.0664007	-0.166447	0.00426613	-0.0260166	-0.0955782	-0.0165704	0.0826421	-0.015312	0.0457984	0.0727277	0.00692963	-0.067412	-0.0525474	0.0268166	0.0658273	0.02028	-0.0506739	-0.0543876	0.0106068	0.056676	0.0291441	-0.0350125	-0.0524596	-0.00247772	0.046323	0.0341197	-0.0211113	-0.0477941	-0.0123533	0.0356481	0.035869	-0.00936637
Ehmt2_3371.301	0.0250701	-0.0137017	0.0319784	-0.028195	-0.0243993	-0.0148664	-0.00352797	-0.00554819	-0.0412412	-0.0927922	0.0418023	0.00552566	0.0041032	-0.00194407	0.00821937	0.282067	0.0838904	-0.115278	-0.0545934	-0.258644	0.0371441	-0.066948	0.0795443	0.0524418	-0.00745868	0.00198158	0.00973455	0.00297797	-0.0098284	-0.00882261	0.00665795	0.0138296	-0.000259691	-0.0164701	-0.00860475	0.0144081	0.0177677	-0.00723964	-0.02502	-0.00502518	0.0260233	0.0199652	-0.0199129	-0.0346274	0.00454034	0.0418298	0.0175995	-0.0405478
Dtymk_1571.165	-0.0241426	0.0202113	0.0267185	-0.278347	0.131003	-0.027303	0.132276	0.301277	0.0479878	-0.224844	-0.141917	-0.175482	0.034349	-0.0286485	-0.0803713	0.0701265	-0.0549371	0.275922	-0.116529	0.042792	-0.0339321	-0.0462032	0.0856899	-0.0877348	-0.0270353	0.152198	0.109552	-0.0740324	-0.144884	-0.0167969	0.104078	0.0735075	-0.050009	-0.0951613	-0.0103923	0.0707894	0.0491103	-0.0338591	-0.0628671	-0.00639395	0.0479654	0.0327121	-0.0229574	-0.0416862	-0.00390627	0.032414	0.0217436	-0.0155789
Trappc5_455.272	-0.0707776	0.0235541	0.0489804	-0.128189	0.0463138	0.0275474	0.0848142	0.170115	0.0842148	-0.311848	0.035556	-0.0767379	0.0110216	-0.127374	-0.23796	0.106842	0.114214	0.22345	-0.00124031	-0.0842899	-0.00563062	0.0434255	-0.0864133	-0.00486507	-0.0356724	0.0436557	0.060273	-0.0103119	-0.0707867	-0.0292883	0.0533314	0.0596198	-0.0210925	-0.0764751	-0.0212945	0.0629809	0.0573977	-0.0329524	-0.0810028	-0.0116882	0.0723684	0.0534337	-0.0457565	-0.0840765	-0.000509873	0.081236	0.0475674	-0.059322
Atl3_1759.401	0.0346546	-0.0978011	0.0489577	-0.0313076	-0.0808562	0.0554656	0.0443961	0.146264	-0.00788754	0.00172502	-0.0598823	0.0154433	-0.0451357	0.000295549	-0.139077	-0.175041	0.0513538	0.135153	0.0589071	-0.00829948	0.0688527	0.0390514	-0.0404794	-0.0627954	-0.000977079	0.0389335	0.025767	-0.0238633	-0.042047	-0.0021863	0.0402011	0.0277834	-0.0238873	-0.0442152	-0.00349818	0.0414754	0.0299029	-0.0238499	-0.0464608	-0.00491855	0.0427535	0.0321289	-0.0237457	-0.0487846	-0.00645349	0.0440327	0.0344647	-0.0235691
Nudt13_117.695	-0.0187345	0.357708	-0.0179772	-0.389786	-0.234357	-0.14014	0.15286	-0.186562	0.121583	-0.158732	0.250219	0.146988	0.375065	0.102242	-0.472971	-0.01915	0.00868321	-0.0731015	0.00649343	-0.243255	-0.176528	0.215023	0.00194454	0.0311098	0.109684	0.135292	-0.012897	-0.164432	-0.10493	0.0829722	0.158039	0.0346648	-0.153966	-0.151281	0.0438597	0.170135	0.0845913	-0.127109	-0.191377	-0.00676954	0.169141	0.13277	-0.0847099	-0.21957	-0.0668221	0.153094	0.175043	-0.0294791
Kitl_252.135	0.14481	-0.0607377	-0.0747472	-0.384344	-0.0326051	0.290214	0.0900931	0.125075	0.0745942	-0.258895	-0.179744	0.141951	0.0769369	0.0261521	-0.414393	0.08124	0.0703582	0.207659	0.0861347	-0.420999	0.1819	-0.032267	-0.0304712	0.00513993	0.132497	0.0876125	-0.0704792	-0.152157	-0.0443925	0.106794	0.124893	-0.00943796	-0.145416	-0.102114	0.060601	0.140269	0.0519603	-0.110729	-0.143241	0.000521805	0.131166	0.10295	-0.0555822	-0.158075	-0.063564	0.0983306	0.135351	0.00862853
Irf2bp2_5748.189	0.250287	-0.0458455	-0.192707	-0.234933	-0.168305	-0.128453	0.086891	0.226666	0.244565	-0.0322596	0.096174	0.144089	0.0874654	-0.162177	-0.497083	-0.198057	0.0568837	0.123671	0.186705	-0.27597	0.114835	0.138716	0.0310142	-0.139349	-0.0118577	0.0308895	0.0323667	-0.0144194	-0.0462498	-0.0125459	0.0423484	0.0402868	-0.0225542	-0.060877	-0.0124077	0.0576253	0.0497387	-0.0343282	-0.0798951	-0.0108542	0.0778336	0.0608484	-0.0512307	-0.104583	-0.00702078	0.104339	0.0736654	-0.0753663
Tor3a_303.839	-0.00885101	0.132728	-0.136307	-0.394337	0.0874623	0.084722	0.22928	-0.00947782	0.154641	-0.102458	0.0521602	0.116	-0.162038	-0.141143	-0.725785	0.148215	0.135472	0.159722	0.260859	-0.1623	0.0573072	0.0535984	-0.0652256	-0.104169	0.10924	0.0686947	-0.0662954	-0.134685	-0.0355469	0.105824	0.12204	-0.0144227	-0.157055	-0.109999	0.0720034	0.164491	0.0612912	-0.143414	-0.190825	0.00119812	0.1815	0.148531	-0.0829765	-0.255544	-0.108136	0.158166	0.229269	0.022515
Pafah1b1_2810.624	0.104218	-0.0256559	-0.00893877	-0.195495	0.0201054	0.0030497	0.0196827	0.0553905	-0.00247159	-0.00167287	-0.0391375	0.10123	-0.0268646	-0.0141452	0.0238613	0.119981	-0.0681737	-0.0714245	-0.0195696	-0.0509704	0.045673	-0.0634626	0.0176336	0.0420325	0.0651621	0.0496648	-0.0309277	-0.0799884	-0.0295452	0.0581077	0.0759609	-0.00102398	-0.0859944	-0.0666004	0.03643	0.095031	0.0382459	-0.0753293	-0.102837	-0.000881433	0.100895	0.0814293	-0.0450656	-0.129612	-0.0521604	0.0880408	0.121035	0.0038493
Poldip2_863.493	-0.0583176	-0.0110036	0.106252	-0.14174	0.05824	-0.0724815	0.0767768	0.317643	0.00354831	-0.233446	-0.111315	-0.114081	-0.00332762	-0.10368	-0.0277367	0.164002	-0.0662513	0.247626	0.0596466	-0.134537	-0.0252896	-0.0470957	-0.0498245	0.0379212	-0.0654168	0.0259	0.0723322	0.0126616	-0.0656844	-0.0453807	0.0380098	0.0607878	-0.00521644	-0.063146	-0.0266126	0.0447824	0.0473956	-0.0190215	-0.0565758	-0.0101675	0.0469415	0.0334547	-0.0285709	-0.0473551	0.00332251	0.0453447	0.0200495	-0.0340424
Tpbg_1116.843	-0.00457529	-0.0627259	-0.0160252	-0.102991	0.117126	0.0558908	-0.0447444	0.0878461	0.100226	-0.147513	-0.0353575	-0.203271	0.257981	0.116992	-0.388294	-0.167538	0.0524786	0.171973	-0.315634	0.408087	-0.0426725	0.00553131	0.0954301	-0.187031	0.0164952	0.013005	-0.00892116	-0.0234427	-0.0090273	0.0202125	0.0278028	-0.000708604	-0.0347936	-0.0285527	0.0173074	0.0479623	0.020224	-0.042031	-0.0608662	-0.000650204	0.0694619	0.0598125	-0.0342888	-0.105986	-0.0465447	0.0817873	0.121168	0.00582404
Fosl1_275.416	-0.148153	0.188641	0.00923723	-0.528849	0.341375	-0.0519325	-0.00366147	0.318693	-0.0383092	-0.0212668	-0.031477	-0.124319	0.0782443	-0.290721	-0.299532	-0.362543	-0.0267925	0.65759	-0.00486451	0.109328	-0.0565649	0.00923343	-0.122847	-0.084977	-0.000519678	0.0105315	0.00740212	-0.00654623	-0.0122617	-0.000914787	0.0124629	0.00908072	-0.00754552	-0.0147433	-0.00144373	0.0147381	0.0111252	-0.00868132	-0.0177207	-0.00214347	0.0174157	0.0136123	-0.00996821	-0.0212925	-0.00306022	0.0205637	0.0166341	-0.0114212
Zfp617_1764.031	0.039271	-0.00587894	-0.137755	-0.0147882	0.0135179	-0.144671	0.119257	0.0470972	0.173494	-0.251185	0.0798969	0.182733	0.130835	0.0853064	-0.580433	-0.366553	0.144595	0.0112172	0.159453	0.00572576	0.0939681	0.192083	-0.0758697	-0.165491	-0.00370319	0.0234619	0.0192431	-0.0136586	-0.0304946	-0.0045016	0.0300936	0.02441	-0.0177715	-0.0391214	-0.0054562	0.0385721	0.0309458	-0.0231269	-0.0502286	-0.00659168	0.0493952	0.0392032	-0.0301054	-0.0645565	-0.00793431	0.0631851	0.0496202	-0.0392087
Ube2e3_7400.751	0.0420199	-0.0423403	0.067045	-0.125489	0.0342765	-0.0695644	0.0716087	0.0283743	0.0413091	-0.103489	0.01223	-0.00364706	0.036299	-0.0300821	-0.0561839	0.0839617	0.0910828	-0.059194	0.0268028	0.0251015	-0.0930314	-0.108486	0.0308746	0.0662369	-0.0107175	0.0177211	0.0202846	-0.00554673	-0.0229977	-0.00767806	0.0174971	0.0172876	-0.00706334	-0.0209028	-0.00503848	0.0170127	0.0145096	-0.00819618	-0.0188119	-0.0027737	0.0163211	0.0119607	-0.00899172	-0.0167606	-0.000856741	0.01547	0.00964521	-0.00949438
Nudt7_559.701	-0.0826779	0.0204576	0.0995349	0.0210871	-0.034668	-0.0210986	-0.0683356	0.087424	-0.0455962	-0.0672121	0.0323004	0.0112626	0.134051	-0.0509502	0.0397413	-0.345238	0.0248835	0.0550857	0.10455	0.13867	-0.0860394	0.0579997	-0.146338	0.0379499	-0.0617504	0.0244122	0.0744707	0.0146921	-0.0741373	-0.0548708	0.0464058	0.0792499	-0.00619513	-0.091511	-0.0411738	0.0696773	0.0782795	-0.0324818	-0.105101	-0.0202878	0.0925162	0.0701064	-0.063381	-0.112486	0.00752702	0.112892	0.053426	-0.0973988
Anxa11 /// Gm2260 /// Gm2274_362.872	0.0620435	-0.12707	0.00722478	-0.118627	-0.109752	-0.0714673	0.0582644	0.0326389	0.153533	-0.356447	0.0432518	0.174971	-0.0219068	-0.0721997	-0.38199	0.0772232	0.0903997	-0.0187831	0.519973	-1.31697	0.468244	0.30854	-0.073779	-0.149631	-0.0313215	0.0289496	0.0502387	-0.00258568	-0.0590559	-0.0310499	0.045259	0.0593024	-0.0156568	-0.0778405	-0.0270416	0.0664519	0.0673876	-0.0353902	-0.0997061	-0.0174469	0.0930869	0.0730197	-0.0639622	-0.124056	2.25333e-05	0.125455	0.0740745	-0.104083
Pank1_213.096	-0.0220459	0.0778504	0.0489851	-0.242602	-0.146986	0.182295	0.0778225	0.037466	0.0661613	-0.0923441	0.036649	-0.148979	0.155996	-0.0928119	-0.115045	0.202076	-0.19654	-0.10561	-0.0518927	0.26536	-0.154832	0.131331	0.0794595	-0.146475	0.0444413	0.109687	0.0322691	-0.0797224	-0.0788076	0.0185051	0.0756231	0.0322946	-0.0470609	-0.0582802	0.00400678	0.0507399	0.0286408	-0.0265236	-0.0419614	-0.00332884	0.0331034	0.0236592	-0.0139122	-0.0294967	-0.00641151	0.0209485	0.0186114	-0.00641911
Sgpl1_1126.715	-0.0909174	0.111029	-0.0997702	-0.0844697	0.00613492	0.149566	0.0988541	0.0795158	-0.0360931	-0.22936	0.124794	0.0837753	-0.11891	-0.0509074	-0.297489	0.00853828	-0.160269	0.218183	0.234742	-0.169211	0.240079	-0.0406096	-0.0393768	-0.106418	0.0875994	0.0541502	-0.0520197	-0.103719	-0.0272666	0.0819617	0.0940281	-0.010696	-0.116392	-0.0817557	0.0532033	0.123008	0.0459752	-0.101929	-0.1357	-0.000667303	0.130862	0.107806	-0.0556187	-0.173147	-0.076546	0.108528	0.161319	0.0187869
Psme3_1378.379	-0.0688262	0.0472312	0.0598966	-0.266109	0.0376456	0.0508013	0.0552606	0.277733	0.0980033	-0.208927	-0.0778077	-0.0517685	-0.0435907	-0.125228	-0.32048	0.0560694	0.0332419	0.259655	0.280767	-0.372989	0.187023	-0.0952655	0.0487923	-0.0984141	-0.0500823	0.113364	0.116615	-0.0490189	-0.1626	-0.0435394	0.126522	0.118537	-0.0629911	-0.174084	-0.0356568	0.140298	0.119642	-0.0785409	-0.18556	-0.0263335	0.154648	0.119804	-0.0957787	-0.1969	-0.0154719	0.16952	0.118883	-0.114819
Ptgr2_1263.417	0.056528	-0.0845858	0.202717	-0.254774	-0.11491	0.0235317	0.0857532	-0.0159907	0.0416709	0.0118699	-0.00813035	0.0747595	0.157737	-0.0337511	-0.324454	-0.212134	0.154947	0.200018	0.0241671	-0.0268155	-0.182089	0.0806092	0.0144209	-0.0159776	0.0321538	0.0478679	-9.40426e-05	-0.057726	-0.0443503	0.0315619	0.0734996	0.0211382	-0.0728887	-0.0820104	0.020695	0.104798	0.0586939	-0.0821567	-0.13772	-0.00893325	0.138736	0.118057	-0.0758614	-0.215326	-0.0706683	0.168644	0.203457	-0.0391795
Tcf12_1177.745	0.0320333	-0.161796	0.0665927	-0.084439	0.0969682	0.0168755	0.134901	0.0647124	0.000859908	-0.0527922	-0.0129385	-0.0288864	-0.133206	-0.2419	-0.136931	0.191219	0.0213504	0.179058	0.0657505	0.00777511	0.0444816	-0.128491	-0.03407	0.00242974	-0.000602183	0.0102186	0.00708441	-0.00595312	-0.0110279	-0.000906916	0.0105661	0.00761316	-0.00597313	-0.0115856	-0.00123706	0.0109179	0.00817002	-0.0059794	-0.012164	-0.00159409	0.0112732	0.00875609	-0.00597068	-0.0127636	-0.00197952	0.0116315	0.00937249	-0.00594561
Tomm20_21193.578	-0.0429035	-0.00580318	0.0213125	-0.0563206	-0.0312655	0.0232941	0.088467	0.122921	0.0737803	0.0202596	-0.0324608	-0.161891	0.0282725	-0.122962	-0.0901693	-0.239176	0.0415918	0.112778	0.127501	0.14763	0.00368845	0.0395125	-0.0149919	-0.126486	-0.00402498	0.00908922	0.0104258	-0.00394373	-0.0147303	-0.0047493	0.0139389	0.0143381	-0.00712519	-0.0214107	-0.00526374	0.0211861	0.019535	-0.0123376	-0.0309806	-0.00522417	0.0319259	0.0263336	-0.0207475	-0.0446407	-0.00402288	0.0476997	0.035062	-0.0341649
Endod1_1684.797	0.0733994	0.059712	-0.334207	0.153151	-0.170975	-0.0503801	0.0885911	0.151242	-0.0669965	-0.134968	0.100395	0.114608	0.260214	0.167384	-0.55597	-0.358363	0.0102303	-0.114485	0.197454	-0.0306146	0.21006	0.180394	-0.122217	-0.141847	0.0369574	0.0566802	0.00361628	-0.056426	-0.0436458	0.0246415	0.0595052	0.0182021	-0.0486392	-0.0533484	0.0106181	0.0588336	0.0316904	-0.0378573	-0.0599057	-0.00431666	0.0546695	0.0432982	-0.0247624	-0.0628478	-0.0192811	0.0472039	0.0523603	-0.0101751
Rtn3_5889.371	0.103038	-0.00953142	-0.0140899	-0.169331	-0.119918	-0.00787529	0.124915	0.136909	-0.0522298	0.0195517	-0.0500288	0.0548146	-0.00154546	-0.00932774	-0.118848	0.168793	0.00938357	-0.0529201	-0.0598335	-0.130367	0.0981884	0.0409992	-0.0592129	0.036255	0.0746391	0.0983572	-0.00194133	-0.103477	-0.0706246	0.0469627	0.0971814	0.0248813	-0.0817374	-0.0829661	0.0195798	0.0891682	0.0454245	-0.0573963	-0.0871229	-0.005517	0.0758608	0.0593194	-0.0327905	-0.0839715	-0.0267198	0.0589302	0.0666968	-0.0098261
Pa2g4_6265.039	-0.0309022	-0.0147607	-0.00658155	-0.271551	0.217848	-0.00830937	0.16185	0.245387	0.106271	-0.3133	-0.107795	-0.046038	-0.0571861	-0.154847	-0.174689	0.0458294	-0.00794965	0.236848	0.19735	-0.208776	0.130291	-0.0112468	-0.0276232	-0.0921796	0.000620146	0.0771654	0.0487705	-0.0481968	-0.0816282	-0.00314629	0.0749511	0.0509571	-0.044319	-0.0814924	-0.00681224	0.0726306	0.0529691	-0.0404569	-0.0811731	-0.0103717	0.0702115	0.0548074	-0.0366189	-0.0806761	-0.0138191	0.0677012	0.0564733	-0.0328128
Pla2g12a_314.316	-0.0569367	0.076362	-0.168565	-0.262585	0.244003	0.0682992	0.146238	0.175452	0.0845426	-0.230481	0.00272297	-0.0983246	0.0883461	-0.304952	-0.349938	0.00889306	-0.238876	0.44306	0.0203615	0.150515	0.169041	0.0185997	-0.157814	-0.127523	0.0780664	0.108429	-0.00429607	-0.137716	-0.0998838	0.0729773	0.158473	0.0435167	-0.165492	-0.181918	0.0451375	0.213169	0.120045	-0.174742	-0.298152	-0.0209388	0.264434	0.228547	-0.145976	-0.452947	-0.1497	0.299	0.367169	-0.0561053
Ier5_1054.532	0.271606	-0.0385489	-0.115663	-0.432982	-0.0867277	-0.0408259	0.133129	0.221686	-0.00747392	-0.0494995	0.128993	0.0826172	0.0726515	-0.10879	-0.346776	0.266841	-0.135764	0.137551	-0.0276822	-0.347067	0.104995	-0.0110925	0.0815445	-0.00936292	0.217892	0.119517	-0.133541	-0.236744	-0.0490978	0.161511	0.168925	-0.0237986	-0.203179	-0.130839	0.0812195	0.17364	0.0625681	-0.132281	-0.169044	-0.0035545	0.142306	0.115165	-0.0503049	-0.161726	-0.0738148	0.0873472	0.132571	0.0220001
Ssh1_50.813	0.00296349	0.0184723	-0.0580328	-0.287726	0.0399661	0.0405568	0.0384206	0.415008	0.0273113	-0.202106	0.0093258	-0.112218	-0.012848	0.0720643	-0.710547	0.137938	-0.0590093	0.000402135	0.483891	-0.0846341	0.105242	-0.102777	-0.0497203	-0.0895587	0.130183	0.121478	-0.0427249	-0.170666	-0.0819871	0.0995349	0.151291	0.0165077	-0.157944	-0.137078	0.0516931	0.163452	0.0761633	-0.121479	-0.17888	-0.00958928	0.15519	0.12854	-0.0657952	-0.198791	-0.078009	0.125466	0.166974	0.0014166
Kctd12b_62.468	0.1369	-0.0303633	-0.0376527	-0.131004	-0.109207	-0.202879	0.288219	-0.0221893	0.0359398	-0.134662	0.0901578	0.0451363	0.341164	-0.127149	-0.0937137	-0.0602921	-0.0284863	-0.119906	-0.144403	0.0744324	0.0505365	0.0502317	0.0386986	-0.0522415	0.062398	0.0887846	0.00280486	-0.0895193	-0.0654435	0.0384772	0.0868815	0.0251756	-0.0705945	-0.0751704	0.0150208	0.07944	0.0423713	-0.0496743	-0.078233	-0.00641867	0.0676934	0.0540963	-0.0285694	-0.0753401	-0.0245909	0.0529745	0.0604374	-0.00877909
LOC102641347 /// Ndufc2_7245.657	-0.00763177	0.00845903	0.00935535	0.021392	-0.0320045	-0.047325	0.0573034	-0.013533	-0.0450523	0.00904497	-0.0278176	0.00993561	0.0397576	0.108465	-0.21327	0.111925	0.0283956	0.0376431	-0.0795089	0.0487781	-0.0851316	-0.0397261	0.0610332	0.00362952	-0.00466876	0.0131219	0.0127191	-0.00571557	-0.0166169	-0.00421971	0.0142505	0.0129521	-0.00674136	-0.0174882	-0.003698	0.0154344	0.0131458	-0.0078504	-0.0183694	-0.0030981	0.0166737	0.0132946	-0.00904666	-0.0192573	-0.00241422	0.0179684	0.0133926	-0.0103341
Ykt6_1504.158	0.0136287	-0.00279402	0.029174	-0.190414	0.114168	0.0412233	0.0673053	-0.0121937	-0.0524335	-0.211154	0.0365925	0.0656201	0.0214346	-0.0320484	-0.0131083	0.138745	-0.0884343	0.184656	0.0810001	-0.318285	-0.0961113	0.0859466	-0.00844288	0.045082	0.0385751	0.0574515	0.000159556	-0.0694116	-0.0537192	0.0371306	0.0875356	0.0261679	-0.0866097	-0.0990947	0.0229323	0.123423	0.0713442	-0.0956539	-0.165637	-0.0141962	0.160983	0.14127	-0.0846307	-0.257293	-0.0902775	0.191785	0.239404	-0.036126
Actr6_636.511	-0.0454703	0.057095	0.0114479	0.00759124	-0.0615811	-0.00708814	0.0921743	0.0593231	-0.105009	-0.205963	-0.0406821	-0.024361	0.222688	-0.0101882	0.0484949	0.00724855	0.134543	-0.037179	-0.129467	0.00471253	-0.221774	0.132242	0.00378803	0.0271112	0.00341747	0.0798002	0.0479348	-0.0503788	-0.0814878	-0.00175774	0.0746129	0.0494847	-0.043783	-0.0788644	-0.00645567	0.0694686	0.0506052	-0.0375709	-0.0760187	-0.0106905	0.0643921	0.0513309	-0.0317409	-0.0729896	-0.0144781	0.0594058	0.0516947	-0.0262891
Nf2_690.963	0.015126	-0.0158889	0.0714537	-0.0533729	-0.0498056	-0.00921165	0.0596753	0.00235644	-0.0888241	-0.0530847	-0.0541276	0.00305087	0.104925	-0.0736177	0.0270398	0.214752	0.020434	0.0819656	-0.0240671	-0.171956	-0.102389	-0.138135	0.0259304	0.144938	0.00503557	0.0444521	0.0247762	-0.0320421	-0.0490329	0.00158353	0.0519395	0.0335319	-0.0343982	-0.0606194	-0.00345925	0.0602066	0.0444399	-0.0361285	-0.0744344	-0.01056	0.0692038	0.0578889	-0.0368743	-0.0908139	-0.0203022	0.0788297	0.0743055	-0.0361701
Hmgn5_1972.992	0.101564	0.0267814	-0.00487297	-0.0501842	-0.17533	-0.136525	-0.0609098	-0.0303273	0.0798001	0.0501006	0.0933824	-0.0871813	0.275287	0.0650831	0.0829868	0.0239664	-0.0819178	-0.189371	-0.387627	0.108294	-0.0977187	0.237843	0.0500836	-0.0487263	0.00434164	0.0770425	0.0496254	-0.0603461	-0.105745	-0.0010791	0.116346	0.0840573	-0.086524	-0.172512	-0.0140649	0.173693	0.139644	-0.122603	-0.284304	-0.0416294	0.25564	0.227044	-0.171184	-0.479022	-0.0970046	0.369708	0.359862	-0.234327
Ctsz_12964.334	-0.025272	0.0345278	0.04196	-0.085477	-0.067255	0.0230466	0.0549551	0.0158911	0.0444458	-0.0216061	0.0424262	0.0253469	0.0354136	-0.0520629	-0.0898461	-0.271387	0.0537559	0.137197	0.020612	0.0869614	0.00674389	0.0110275	-0.0281758	-0.0411357	0.0181018	0.0120034	-0.0100923	-0.0216912	-0.0067318	0.0179844	0.02213	-0.00147514	-0.0259316	-0.0197135	0.0120161	0.031111	0.0126371	-0.0242614	-0.0341812	-0.00144926	0.0354525	0.0308625	-0.0137401	-0.0462624	-0.0227177	0.0310575	0.0497729	0.00728456
Spty2d1_418.603	0.0341035	-0.13749	0.139613	-0.189516	0.0146944	0.148561	0.0906999	0.0677371	-0.0137276	-0.235132	0.0204857	0.0682058	-0.0566375	-0.07188	-0.0500326	0.0154385	-0.0356932	0.192034	-0.0514109	-0.0692369	0.109982	-0.00551676	-0.0467418	-0.0220975	0.0693988	0.0401507	-0.0397212	-0.0741781	-0.0183135	0.0572143	0.0634953	-0.00705479	-0.0728592	-0.0504703	0.0316954	0.0736535	0.0277235	-0.0548684	-0.0729902	-0.00252278	0.0681021	0.0570407	-0.0240696	-0.0798673	-0.0384412	0.0472702	0.0746172	0.0126102
Lmnb2_160.906	0.0682217	-0.0186567	-0.0370525	-0.424215	0.0571501	-0.040778	0.350819	0.27858	0.00440209	-0.553486	-0.0406299	-0.0693644	0.166828	0.0494434	-0.476751	0.49451	-0.0534335	-0.154767	0.104421	-0.485961	0.270659	0.0731427	0.0422813	-0.136059	0.0576889	0.191221	0.0758531	-0.155259	-0.184158	0.0285145	0.175818	0.0925	-0.1237	-0.182136	0.00213932	0.158596	0.104756	-0.0940929	-0.176038	-0.0211272	0.140112	0.113022	-0.0668103	-0.166597	-0.0410816	0.120887	0.117703	-0.0421012
Haghl_192.324	0.080898	-0.00524827	0.154454	-0.0796752	-0.228933	0.000133839	-0.258003	-0.115881	-0.144735	-0.0527051	0.270646	0.235287	0.0637101	-0.0996143	0.272466	0.0687031	0.265941	-0.333196	-0.162109	-0.134258	-0.43654	0.117143	-0.0960148	0.294981	-0.0247477	0.00303341	0.0255174	0.00966741	-0.0208039	-0.0199115	0.0106156	0.0245865	0.00170348	-0.0238591	-0.0134202	0.0166961	0.0213262	-0.00600789	-0.0243932	-0.00602085	0.0207874	0.0161756	-0.0127213	-0.0224969	0.00150243	0.0226216	0.00972962	-0.0178237
Rusc1_61.275	0.0276641	-0.037267	0.0140518	-0.00821178	0.00441839	0.0157394	0.121742	-0.0910979	-0.182047	-0.119551	0.000901447	0.0543199	0.0760759	0.055206	0.0532548	0.111821	0.0443986	0.0374273	-0.102447	0.01873	-0.290645	-0.00818512	-0.0241856	0.152583	0.056046	0.0293238	-0.0311067	-0.0526627	-0.0111954	0.0394382	0.0408969	-0.00544859	-0.0438837	-0.0286772	0.0185128	0.0405683	0.0143046	-0.0278109	-0.0352999	-0.00113283	0.0315652	0.0255767	-0.010039	-0.0323814	-0.0154992	0.0180457	0.0282946	0.0050669
Trp53inp1_10436.236	0.0597765	-0.080132	-0.0681757	0.00239815	-0.151049	0.00188586	0.0816114	0.22687	0.032223	0.0736892	0.0266075	-0.0616054	0.0128382	-0.115915	-0.251981	-0.431004	-0.0343674	0.301845	0.120432	0.16327	0.131751	-0.0817014	0.00232736	-0.147915	0.0105019	0.0295061	0.00964541	-0.0277888	-0.0318388	0.00879455	0.0424513	0.0212794	-0.0347107	-0.0510294	0.00297399	0.0592206	0.0404335	-0.040657	-0.0792769	-0.0101869	0.0799183	0.0704869	-0.0429924	-0.119951	-0.0358794	0.103859	0.115629	-0.0370642
Tnfaip1_2983.409	-0.00870751	0.0479148	-0.0410338	-0.0401662	0.0101109	0.0274966	-0.133557	0.133683	-0.00795076	-0.0402873	0.0513557	-0.0453316	0.123806	0.0588058	-0.141138	-0.244752	0.0754384	0.116555	-0.0627093	0.166861	-0.115076	-0.0106085	0.0355242	-0.0295618	0.000522642	0.000656046	-9.24965e-05	-0.000850958	-0.000572728	0.000547526	0.00111628	0.000247255	-0.00112371	-0.00119373	0.00037254	0.0017098	0.000930455	-0.00127891	-0.00212797	-0.000192099	0.00236046	0.00211986	-0.00109521	-0.00339226	-0.00142173	0.00286752	0.00397756	-0.000203353
Midn_4253.302	0.0178734	0.0675847	-0.0709391	-0.145847	0.0888893	-0.052839	-0.0256202	0.103766	0.0746469	-0.379255	0.101604	0.0214622	0.110745	0.165803	-0.36708	0.255816	0.0482503	0.0733808	-0.0910573	-0.355174	0.0564426	0.0411209	0.0749317	-0.0153816	-0.0191414	0.0172051	0.030419	-0.000989002	-0.0344377	-0.0188023	0.0259543	0.0351032	-0.00789337	-0.043902	-0.0166325	0.0369795	0.0392055	-0.0178006	-0.0545405	-0.0118684	0.0504915	0.0420758	-0.0314756	-0.0660282	-0.00359025	0.0665951	0.0428287	-0.0497849
Lpcat4_611.037	-0.0197919	0.0946004	-0.00513256	-0.124912	0.038102	-0.112445	0.110983	-0.0786974	-0.0307685	-0.246177	0.10604	0.218181	0.101951	-0.159171	-0.31301	0.371504	0.18212	-0.0480436	0.00270445	-0.296173	-0.0879365	-0.0184182	0.00310812	0.106052	0.0736494	0.0524023	-0.0375729	-0.0890043	-0.0304526	0.0656341	0.08343	-0.00203511	-0.0956654	-0.07414	0.0393476	0.104685	0.0443773	-0.0809405	-0.115497	-0.00592292	0.108564	0.0937945	-0.0420575	-0.142757	-0.0669273	0.0885398	0.136031	0.0179099
Mtf2_265.582	0.173434	-0.186077	0.0897074	-0.295035	-0.260448	-0.0382979	0.162743	0.263555	0.213873	-0.301992	-0.0657134	0.192243	0.0891741	0.1902	-1.01543	0.330288	-0.232721	0.0961229	0.0775828	-0.0567627	0.16079	-0.00553212	-0.0048064	-0.131826	-0.00794306	0.137196	0.0937457	-0.0806597	-0.149304	-0.0125078	0.123337	0.0890123	-0.0685817	-0.136097	-0.0161629	0.110653	0.0842605	-0.0580206	-0.123926	-0.0190283	0.0990694	0.0795368	-0.0487981	-0.112723	-0.0212113	0.0885124	0.0748795	-0.0407578
Il17ra_122.35	-0.124297	0.0526162	0.108468	-0.668721	0.34576	0.0274197	0.311797	0.253104	0.051937	-0.238659	-0.103226	0.00184085	-0.251282	-0.0983744	-0.600404	-0.0679073	0.0208776	0.360794	0.276163	-0.128159	0.243807	0.0149103	-0.0938834	-0.226318	0.137371	0.161484	-0.017264	-0.192581	-0.119152	0.0908697	0.170133	0.0387989	-0.156929	-0.154867	0.0386146	0.163106	0.0847195	-0.110164	-0.172834	-0.0144733	0.14222	0.117972	-0.058468	-0.172313	-0.0633199	0.110094	0.137352	-0.0074772
Usp12_178.749	-0.0651832	-0.025469	0.0259857	-0.212273	-0.0849733	0.331436	0.083053	0.24262	0.048084	-0.223343	-0.089134	-0.074122	0.0361452	-0.127883	-0.416667	-0.169137	-0.0563996	0.410877	0.0910275	0.0545819	0.0705971	0.232976	-0.227007	-0.147751	0.0919692	0.0894959	-0.0266224	-0.118542	-0.060849	0.0687058	0.109655	0.0149212	-0.108302	-0.0976586	0.033906	0.11707	0.0565894	-0.0823705	-0.12462	-0.00932497	0.109916	0.0930609	-0.0437013	-0.136577	-0.0562668	0.0877518	0.119623	0.00276398
Klc4_338.895	-0.0687488	0.0447426	0.289285	-0.198944	-0.0609727	0.0244361	-0.17967	-0.174337	-0.180943	-0.00115852	0.051708	0.186039	9.89935e-05	0.0337384	-0.0729459	0.485328	0.184224	-0.198099	-0.0449157	-0.563461	-0.158438	0.123852	-0.126175	0.252701	0.0240506	0.0145714	-0.0155903	-0.0305846	-0.00804458	0.0278777	0.0330642	-0.00388649	-0.0426752	-0.031948	0.0214018	0.0540582	0.0221447	-0.04532	-0.0655945	-0.00339094	0.0696215	0.063712	-0.026917	-0.101806	-0.0545099	0.0663351	0.115444	0.0243603
Gtf2h4_372.488	-0.0311798	0.0511372	0.104144	-0.19214	-0.00527095	0.00344031	0.0310072	0.110852	-0.0554027	0.0130884	-0.131844	0.0201389	0.0599325	-0.030676	0.0598343	-0.0652741	0.0782324	0.019866	-0.0454171	-0.0279499	-0.0985231	0.110593	-0.0313396	0.00801653	-0.00482836	0.0580603	0.0407089	-0.0318545	-0.0604956	-0.00632521	0.0521866	0.038433	-0.0273337	-0.0552992	-0.00750759	0.0468387	0.036201	-0.023352	-0.0505008	-0.00841845	0.0419764	0.0340251	-0.0198509	-0.0460748	-0.00909593	0.0375618	0.0319151	-0.0167779
Bak1_568.54	0.0367719	0.120045	-0.014422	-0.283135	-0.0591713	-0.292986	0.13854	0.216283	0.178292	-0.27393	0.0641219	0.180051	0.129329	-0.0112699	-0.567277	0.223273	-0.0696083	0.0284703	0.0963435	-0.418508	0.161281	0.112758	0.107348	-0.144251	0.0890111	0.104524	-0.0220083	-0.156172	-0.0977532	0.0973149	0.183467	0.0381788	-0.219267	-0.229774	0.0693432	0.28333	0.160772	-0.259222	-0.465441	-0.0401151	0.388267	0.361616	-0.215119	-0.87605	-0.330825	0.464129	0.637556	-0.00355619
Ndufs4_185.757	-0.0111708	0.150831	0.0507854	-0.117765	-0.130648	0.0195256	-0.0477164	-0.199395	-0.173342	-0.102977	-0.0109667	0.301559	0.220062	0.0552142	0.000309352	0.140673	0.184934	-0.10262	-0.207899	-0.0218272	-0.507119	-0.027704	0.0038807	0.285954	0.0498474	0.0586194	-0.00613306	-0.0645191	-0.0405405	0.0323514	0.061683	0.0137853	-0.0526247	-0.0521609	0.0132621	0.0587086	0.0302803	-0.0369012	-0.0576765	-0.00549642	0.0505236	0.0422183	-0.0193103	-0.057082	-0.0221478	0.038328	0.0490016	-0.00175422
Tcf3_137.908	0.000734852	0.0807244	0.0635641	-0.316322	-0.132117	-0.0993908	0.225676	0.161497	0.157446	-0.323849	0.00531649	0.0900879	0.103491	0.0662182	-0.534457	0.0391837	0.0602995	0.0256572	0.28598	-0.443987	0.0405225	0.297209	-0.163544	-0.0389171	0.0389201	0.175183	0.0822094	-0.139552	-0.186847	0.0179503	0.178994	0.105323	-0.126246	-0.206317	-0.0056883	0.18023	0.128482	-0.109538	-0.224032	-0.0319302	0.178631	0.151321	-0.0895016	-0.239415	-0.0606569	0.173946	0.173467	-0.0662877
Dcaf10_760.983	-0.00912991	0.00830632	0.000702875	-0.0842141	0.0555553	-0.0306358	0.0664203	0.0429098	0.0654694	-0.0608157	-0.08728	0.016201	0.0683572	0.0207787	-0.201955	-0.0232706	0.0297966	0.0707048	0.0126686	-0.0332166	0.0193587	0.119736	-0.0506896	-0.052321	-0.0452737	0.0151565	0.0493349	0.0110018	-0.0427857	-0.0323345	0.0236619	0.0419688	-0.00103382	-0.0416634	-0.0200611	0.0286683	0.0333185	-0.0104444	-0.0378793	-0.00915382	0.0306198	0.0242363	-0.017121	-0.032291	-5.26711e-05	0.0300577	0.0154292	-0.0211734
Afp_3835.512	-0.0353943	0.147546	-0.134597	0.0622796	-0.0409141	-0.10626	-0.0780473	0.00347128	0.061518	-0.1046	0.0636312	-0.0354574	0.334832	0.223663	-0.243706	-0.34214	-0.0343078	0.0564331	-0.104741	0.213723	-0.120663	0.0990952	-0.0458182	-0.0170153	-0.00414548	0.000565987	0.0046677	0.00180401	-0.00402863	-0.00398649	0.00221141	0.00534456	0.000410122	-0.0054702	-0.00324629	0.00410872	0.00553986	-0.00150359	-0.00666677	-0.00183066	0.00609049	0.00506788	-0.00385789	-0.00737718	0.000295616	0.00792335	0.00376848	-0.00648828
Taf10_5385.382	-0.0439965	0.0666123	0.0107548	-0.107284	0.077853	-0.0886716	0.0318053	0.101425	0.0954957	-0.122666	-0.0181146	-0.0274188	-0.0145071	-0.106052	0.136142	-0.0554922	-0.116574	0.111665	0.11104	-0.0398301	-0.0155908	-0.0233331	-0.0184871	0.00566801	-0.0227069	0.0797211	0.0661052	-0.0344182	-0.0824588	-0.0161682	0.0609727	0.0496052	-0.0266256	-0.0616798	-0.0114805	0.046553	0.0371605	-0.0205911	-0.0462136	-0.0081243	0.0354946	0.0277999	-0.0159181	-0.0346668	-0.00572613	0.0270331	0.0207743	-0.0123001
Mob1a_1815.295	0.0218582	0.0349822	0.00258245	-0.198334	-0.038104	0.0343417	0.046708	0.20627	0.0264266	-0.145568	0.00948672	0.0877137	-0.00340004	-0.0627092	-0.273151	0.0239588	0.0367008	0.112162	0.0843639	-0.112192	0.0826959	0.00647544	-0.059614	-0.00574681	0.0140148	0.0933342	0.0478	-0.0634531	-0.0899315	0.0038752	0.0844883	0.0514858	-0.0514008	-0.085914	-0.00491346	0.0756564	0.0538845	-0.0404011	-0.0811797	-0.0124014	0.066961	0.0551517	-0.0304551	-0.0759104	-0.0186531	0.0585069	0.0554345	-0.0215478
Rab17_102.437	-0.0063979	0.293056	0.112323	-0.394606	-0.303111	0.11194	-0.266616	-0.28777	-0.235011	0.302722	-0.105265	0.679326	0.169826	-0.200129	-0.0640597	0.158211	0.262385	-0.178508	-0.338631	-0.413341	-0.172365	0.0579647	-0.0941161	0.291475	0.121772	0.175954	0.0101861	-0.181475	-0.135079	0.0700081	0.163023	0.0516436	-0.133049	-0.145935	0.0234251	0.141157	0.0790676	-0.0865059	-0.14271	-0.0153785	0.113711	0.0941175	-0.0450181	-0.128925	-0.04485	0.0837391	0.0987576	-0.0104192
Cxxc1_413.812	0.06094	0.0981113	0.0265083	-0.503505	0.1661	-0.00930919	0.0212368	-0.0406564	0.220953	-0.338897	0.0383731	0.0874522	0.114482	0.130957	-0.26873	0.17152	0.0288636	-0.020861	0.010478	-0.335406	-0.0597034	0.118086	0.00635821	0.0363915	0.105555	0.0697	-0.0573687	-0.124496	-0.0379747	0.0907214	0.109825	-0.00547162	-0.12832	-0.0961109	0.0517395	0.132512	0.0557632	-0.101822	-0.145024	-0.00888327	0.129994	0.113866	-0.0466856	-0.169397	-0.0831008	0.0975664	0.156119	0.0274822
Msl1_542.025	0.143283	-0.153938	-0.0597719	-0.0563243	-0.147817	-0.0807533	0.143882	0.206776	0.169203	-0.0761714	0.0733369	0.0548028	-0.0440561	-0.0656029	-0.587178	0.0708829	-0.128949	0.0496739	0.22745	-0.036098	0.21323	0.0279267	0.0256832	-0.199604	-0.0465505	0.00311694	0.0467654	0.0201921	-0.0381839	-0.0395574	0.0184509	0.047552	0.00521486	-0.0467068	-0.0282096	0.0319935	0.0433613	-0.0107879	-0.0503714	-0.013714	0.0423347	0.0344987	-0.0261317	-0.048651	0.00237926	0.0483866	0.0217388	-0.039116
Dnajc17_111.393	-0.0737762	0.140286	0.0828191	-0.197072	-0.0160949	-0.0382865	-0.102694	0.0566633	0.0732443	0.0785241	0.0943466	0.0631661	0.0378322	-0.243712	-0.298438	0.0718566	0.0529934	0.215274	0.00643959	-0.031912	-0.0704507	-0.0526337	0.0654301	-0.0251569	0.0129168	0.0107117	-0.0062653	-0.0180468	-0.00773742	0.0145778	0.0212654	0.000748242	-0.0248389	-0.0217621	0.0108222	0.034193	0.01621	-0.0273365	-0.0426213	-0.00340992	0.0459088	0.0426206	-0.0187256	-0.0682352	-0.0345422	0.0490161	0.0799259	0.0103177
Erp44_532.901	0.12177	0.0121567	-0.0946658	-0.0723086	-0.140682	0.0499851	0.0749812	-0.13787	0.0415426	0.0328474	0.011077	0.0917818	0.0917034	0.134746	-0.118195	-0.0205388	-0.108075	0.000447604	-0.0098736	0.0317935	-0.1441	0.0185435	0.0315865	0.0445108	0.0571558	0.0306548	-0.0367252	-0.0644162	-0.0137803	0.0545303	0.0594248	-0.00877022	-0.0735643	-0.0510845	0.0341815	0.0797775	0.0309364	-0.062569	-0.0865597	-0.00461598	0.0830231	0.0738511	-0.0282458	-0.10764	-0.0574272	0.0621724	0.108347	0.0255778
Csf1_302.454	-0.0721627	-0.198778	0.12397	-0.0375178	0.276803	0.000269463	0.103486	-0.00189844	0.06009	-0.302226	-0.0042417	0.062098	-0.173895	-0.143147	-0.358792	0.0182787	0.391662	0.178462	-0.0986728	0.0612679	-0.0330743	0.127474	-0.135153	-0.076403	-0.00113117	0.00492739	0.00435272	-0.00250793	-0.00628076	-0.00131435	0.00586223	0.00514464	-0.00300707	-0.00745505	-0.00152645	0.00697382	0.00608011	-0.00360526	-0.00884939	-0.00177189	0.00829537	0.007185	-0.00432214	-0.0105053	-0.00205571	0.00986625	0.00848976	-0.00518124
Bphl_835.191	0.0735506	0.0200192	0.0307226	-0.052051	-0.10377	-0.0937651	0.0439706	-0.150307	-0.0781485	-0.0679771	0.129191	0.137887	0.142604	0.114457	-0.0147226	-0.0630527	0.209988	-0.0968103	-0.149669	-0.112758	-0.233414	0.0196607	0.0701135	0.120351	0.0383189	0.0258581	-0.0198411	-0.0439477	-0.0143145	0.0335455	0.0417255	-0.00146284	-0.0463505	-0.035709	0.0192868	0.0517474	0.021965	-0.0379348	-0.0544559	-0.0038289	0.0520552	0.0460407	-0.0179972	-0.0649762	-0.0328646	0.03991	0.0652585	0.0113468
Mta1_1494.689	0.0153427	0.000505986	0.0479078	-0.122594	-0.0234631	-0.0962362	0.0968864	0.0950391	0.0481105	0.033377	-0.00644422	0.00274256	0.00922031	-0.0747159	-0.2268	0.0271713	0.0535495	0.0626831	0.0362789	-0.0570822	0.0359282	0.0449196	0.0252766	-0.0707988	-0.024656	0.00706542	0.0298935	0.00853939	-0.0283012	-0.0245013	0.0171252	0.0350573	0.000443233	-0.038601	-0.0210785	0.0295994	0.0381446	-0.0115959	-0.0487619	-0.0133257	0.043987	0.0378026	-0.0279476	-0.057351	-0.000288347	0.0593347	0.0324587	-0.0486083
Slc35a5_374.048	0.123644	-0.0609073	-0.150855	-0.13235	-0.148492	0.24247	0.162066	0.11822	-0.0296557	-0.110709	0.0504655	-0.00290808	0.026432	-0.164274	-0.243815	-0.079339	0.191857	-0.0270149	0.178547	-0.0429648	-0.127619	0.230959	-0.0860921	-0.0725552	0.151892	0.0877374	-0.0862208	-0.161648	-0.0396267	0.112463	0.123933	-0.0114961	-0.140513	-0.0970942	0.0545791	0.128353	0.050636	-0.0920449	-0.124895	-0.00773639	0.10548	0.0903403	-0.0329183	-0.120384	-0.0603685	0.0637081	0.104265	0.0217225
Fam46b_325.692	0.027587	0.0704805	0.110372	-0.369009	0.0303444	0.00253119	-0.0352098	0.0731337	-0.00520866	-0.112495	0.00871319	0.114411	0.231222	0.0207534	-0.350783	0.171845	0.0444253	-0.058083	-0.039076	-0.159236	-0.00159109	0.0239848	0.0593474	-0.00185821	0.0618228	0.105607	0.0140787	-0.105258	-0.0898984	0.0404131	0.113586	0.0422931	-0.0925726	-0.11224	0.0139214	0.115323	0.0700467	-0.0727064	-0.129595	-0.0166603	0.110116	0.0956329	-0.0464909	-0.140123	-0.0499208	0.0975348	0.117396	-0.0152633
Pmm1_233.648	-0.285843	0.207421	-0.123187	-0.160281	0.162252	0.107911	0.0665971	0.451864	0.154954	-0.465204	-0.123867	-0.146507	-0.0542963	-0.125789	-0.749654	0.0148772	0.0573148	0.38343	0.193262	0.127257	0.095703	0.0131987	-0.0138818	-0.307504	-0.0366437	0.0613546	0.0732712	-0.0200458	-0.0928566	-0.033723	0.0714926	0.0765138	-0.0291632	-0.102405	-0.0296932	0.0825134	0.0792504	-0.0397397	-0.112312	-0.0244011	0.0944189	0.0813411	-0.0519268	-0.122487	-0.0176861	0.107198	0.0826268	-0.0658866
1700066M21Rik_349.701	-0.0285521	0.0979103	-0.062096	-0.0968281	-0.00361905	-0.111322	0.100989	0.071331	0.179434	-0.0570261	0.0517161	-0.138886	0.131071	-0.0726814	-0.190311	-0.269615	0.119665	0.0282513	0.0714828	0.165145	0.00322538	0.042737	-0.0861631	-0.0484222	-0.0101851	0.00672664	0.0139298	0.000893308	-0.0137471	-0.00847718	0.00916347	0.0135665	-0.00179119	-0.0148672	-0.00636042	0.011432	0.0127022	-0.00459229	-0.0155326	-0.00388455	0.0134424	0.0113339	-0.00741867	-0.0156897	-0.00111515	0.0151083	0.00947577	-0.0101716
Gm21540 /// Tmed2_5649.638	0.0421552	0.0114427	0.0151223	-0.115076	-0.0885943	0.0612426	0.00963765	0.0908193	0.0153068	-0.0792027	0.0111254	-0.0281926	0.0344856	0.0206415	-0.02601	0.0578026	-0.0456556	0.111897	-0.0485335	-0.0966312	-0.0706644	0.0743897	-0.0174656	0.0300858	0.0321662	0.0630887	0.0133242	-0.0505365	-0.0459411	0.0149275	0.0501753	0.0202181	-0.0331995	-0.0409157	0.00295192	0.0380998	0.022835	-0.0198799	-0.0344566	-0.00474117	0.02751	0.02261	-0.0100915	-0.0276553	-0.00912973	0.018699	0.0206464	-0.0032549
Psmf1_901.246	-0.0853715	0.0113979	-0.0877548	0.149156	0.108971	-0.0537076	0.0354031	-0.0293017	-0.0159675	-0.1657	0.0393543	0.0164364	0.0955604	0.1228	-0.272309	-0.395271	0.236798	0.0221346	0.182232	-0.0185842	0.0109361	0.103106	-0.102259	-0.0607602	0.000741273	0.00327247	0.00147072	-0.00248205	-0.00328681	0.000378928	0.0037604	0.00219445	-0.00250358	-0.00407699	-0.000142446	0.00424004	0.00308145	-0.00240294	-0.00495866	-0.000856937	0.0046833	0.00414808	-0.0021385	-0.00592104	-0.00180175	0.00505327	0.00540762	-0.00166121
Ubtf_359.074	0.00111654	-0.0209861	-0.109648	-0.16533	0.129363	-0.00835297	0.130046	0.216291	0.0922309	-0.0918674	0.0128848	-0.0349162	-0.112561	-0.246053	-0.515401	0.0504871	0.0619817	0.245995	0.343541	-0.175441	0.141845	0.026773	-0.124552	-0.0973172	0.0254642	0.0413162	0.00211486	-0.050115	-0.0423653	0.026409	0.0702015	0.0246174	-0.0693167	-0.0865506	0.0153495	0.11006	0.0704646	-0.0839482	-0.161322	-0.0224639	0.158704	0.152209	-0.0782856	-0.281453	-0.115263	0.207048	0.282224	-0.0228159
Gabpb2_65.193	0.00978285	-0.0288748	-0.0456704	0.0116145	-0.0996143	-0.11029	0.0947725	0.185859	0.153415	-0.175155	0.017641	0.125987	-0.102729	0.189788	-0.629667	-0.0543148	-0.019551	-0.0065002	0.127686	0.0943976	0.268792	0.00496096	-0.153897	-0.0906858	-0.0661631	0.0238347	0.0723087	0.0152213	-0.0643288	-0.0478524	0.0353629	0.0620595	-0.00147482	-0.0626569	-0.0305435	0.0423345	0.0501407	-0.0147808	-0.0574366	-0.015083	0.0453112	0.0375793	-0.0245226	-0.0497482	-0.00200737	0.0449537	0.025248	-0.0307906
Bcas2_6233.035	-0.0230594	-0.00592453	0.0187265	-0.0926794	0.024465	-0.0702356	0.108492	0.185664	0.0284429	-0.114967	0.0636847	-0.0687979	0.0299445	-0.0245868	-0.3294	-0.0430233	0.0239734	0.070967	0.0617258	0.0633418	0.0591357	0.131268	-0.053045	-0.128354	-0.0128846	0.0446555	0.0403743	-0.0206781	-0.055056	-0.0126614	0.0460285	0.0410073	-0.0217224	-0.0563994	-0.0124178	0.0474364	0.0416425	-0.0228041	-0.0577701	-0.0121531	0.04888	0.0422797	-0.0239244	-0.0591685	-0.0118662	0.0503598	0.0429186	-0.0250845
Flt4_196.136	-0.0783169	0.0754726	0.191954	-0.0788737	-0.207533	-0.144045	0.169695	0.0249547	-0.230762	0.0496296	0.0216599	-0.071044	0.0522461	0.0408565	-0.135689	0.510992	0.0684022	-0.213222	-0.380035	0.029199	0.102665	-0.202445	0.0571788	0.0818122	-0.0319225	0.0242397	0.041067	-8.57298e-06	-0.0383065	-0.0202534	0.0234052	0.0304829	-0.00502216	-0.0309511	-0.0117968	0.0213724	0.0219522	-0.00778469	-0.0244082	-0.00584893	0.0187318	0.0152501	-0.00897546	-0.0187948	-0.0018208	0.0158867	0.0101176	-0.00911944
Polr3f_153.097	-0.00898017	-0.106143	0.0988679	-0.252671	0.162028	0.0304807	0.03944	0.329384	-0.130691	-0.169521	0.0113523	-0.0305575	0.144655	-0.131304	-0.457976	0.0068228	-0.036397	0.112468	0.0613489	0.249205	0.104354	-0.0766681	-0.0500699	-0.11331	0.014586	0.0419247	0.0143238	-0.0320903	-0.035858	0.0070243	0.0387225	0.019465	-0.0252412	-0.0364129	0.000135917	0.0346984	0.0233513	-0.0184593	-0.0357356	-0.0059382	0.0300735	0.0260219	-0.0119522	-0.0340002	-0.0110991	0.0250616	0.0275475	-0.00589064
Tpm1_21.011	-0.265687	0.585719	-0.267495	-0.0265402	-0.275831	-0.480596	0.116023	-0.113342	-0.24796	-0.565002	0.126238	0.491328	0.35024	0.156125	-0.712346	-0.151847	0.825615	0.220196	-0.454381	-0.695139	-0.995737	0.605739	-0.0749106	0.178912	0.093876	0.204412	0.0529081	-0.220087	-0.226942	0.0703489	0.261034	0.12492	-0.240624	-0.346333	0.0193652	0.318284	0.222316	-0.236911	-0.507076	-0.0738824	0.369871	0.345299	-0.19339	-0.718966	-0.233585	0.406735	0.49112	-0.09414
Atad1_2501.603	-0.0600539	-0.0317982	0.0229978	-0.0210372	0.059047	0.143049	-0.00847876	0.0380738	0.0013248	-0.143132	-0.0146241	-0.107269	-0.00460599	-0.0250433	0.172969	-0.349619	0.00973555	0.153173	0.168183	0.0485003	-0.0320543	-0.0347653	-0.0895881	0.0100071	0.00478507	0.00474511	-0.00144609	-0.00632089	-0.00342524	0.0041381	0.00697914	0.00103443	-0.00679704	-0.0065052	0.00222817	0.00878873	0.00454695	-0.00598488	-0.00970637	-0.00116812	0.00955312	0.00882668	-0.00340952	-0.0123659	-0.00605764	0.00856666	0.0133049	0.00124364
Hif1an_163.326	0.095373	-0.0324946	-0.046806	-0.156019	-0.127541	0.164451	0.114339	0.0636121	-0.0501609	-0.198662	0.0368726	-0.00496746	0.0957419	-0.0050396	-0.222839	0.351428	-0.0630101	-0.210129	0.225629	-0.177008	-0.015757	-0.0696481	0.0380923	0.0326528	0.119345	0.0744791	-0.0567126	-0.116306	-0.0342201	0.0743385	0.0859176	-0.00258959	-0.0851222	-0.0614507	0.0295472	0.0754152	0.0310078	-0.04765	-0.0654883	-0.00570651	0.0530695	0.0453574	-0.0145017	-0.0539134	-0.0271241	0.027651	0.0449049	0.00901912
[truncated: 4,493 more rows]

## Sheet: Fig 4D
mmh-d3 converted phase	liver phase
12.9191	13.1874
14.2903	12.305
16.353	14.9342
14.5256	13.069
20.637	19.5006
9.96817	13.6502
3.56501	6.08095
17.294	13.2664
2.44725	6.21355
3.24237	4.05551
10.2751	14.4597
[truncated: 580 more rows]

## Sheet: Fig 4E
gene symbol_mean expression	MMH-D3 cells																																																Mouse liver
[truncated: 204 more rows]
[truncated: 47 more columns]

[truncated: 19 more sheets: Fig 4F, Fig 4G, Fig 4H, Fig 4I, Fig 4J, Fig 4K, Fig 5C, Fig 5F and 5G, Fig 6D , Fig 6F, Fig 6G, Fig 6H, Fig 6I, Fig 6J, Fig 6K, Fig 6M, Fig 7A, Fig 7C, Fig 7D]
