# Supplementary material for: 12-h clock regulation of genetic information flow by XBP1s
Source: PLoS Biol. 2020 Jan 14;18(1):e3000580. doi: 10.1371/journal.pbio.3000580 (PMC6959563; doi:10.1371/journal.pbio.3000580)
Supplement: S9 Table — Tab 1: 12-h rhythm identified by RAIN. Tab 2: A list of 12-h genes that are shared between the eigenvalue/pencil and RAIN methods. (XLSX) [file pbio.3000580.s016.xlsx]

## Sheet: MMH-D3 RAIN
	pVal	phase	peak.shape	period	adjP
Tnrc6b	4.86052e-08	10	6	10	0.000928699
Zfp318	3.21446e-06	10	6	10	0.0242108
Zbed6 /// Zc3h11a	5.11125e-06	10	4	10	0.0242108
Cdk16	5.34358e-06	6	4	10	0.0242108
Dnm2	6.64856e-06	8	8	12	0.0242108
Tpm1	7.60269e-06	4	6	10	0.0242108
Wdr33	8.93316e-06	10	4	10	0.0243837
Rad51d	1.05929e-05	2	4	12	0.0246573
Plekhm3	1.23276e-05	12	6	12	0.0246573
Wdr41	1.29048e-05	12	6	12	0.0246573
Med20	1.8012e-05	6	4	10	0.0312869
Necap1	2.02401e-05	12	6	12	0.0322273
Slco2a1	2.23934e-05	10	6	10	0.0329131
Man1a	2.5858e-05	12	4	12	0.0352906
Rnf41	3.75292e-05	10	6	12	0.045457
2810001A02Rik	3.96627e-05	10	8	12	0.045457
Cds2	4.04443e-05	2	8	10	0.045457
Ube2d3	4.6063e-05	6	4	10	0.0488959
Avl9	5.31436e-05	10	8	12	0.0521704
Gapvd1	5.55118e-05	10	6	10	0.0521704
Tm9sf3	5.73391e-05	8	8	12	0.0521704
Srd5a3	7.5902e-05	2	6	12	0.0610353
Wdr47	8.02393e-05	10	6	12	0.0610353
Ar	8.12488e-05	10	4	10	0.0610353
Tpgs2	8.24079e-05	2	6	12	0.0610353
Mrs2	8.30543e-05	10	4	10	0.0610353
LOC102642487	9.10824e-05	12	6	12	0.064456
Phlda2	9.75883e-05	12	6	12	0.0665936
0	0.000102211	2	2	10	0.0673427
Rnf14	0.000127539	12	8	12	0.0742057
Trappc13	0.000129299	12	6	12	0.0742057
Cdk7	0.000129299	12	6	12	0.0742057
Rad52	0.000132467	6	6	10	0.0742057
Maoa	0.000133761	12	4	12	0.0742057
Cyp4f16	0.000135929	10	6	12	0.0742057
Vav3	0.000145875	12	6	12	0.0774233
Gm21451 /// Loxl2	0.00015484	10	4	10	0.0783627
Cds2	0.000163627	2	8	10	0.0783627
Afg3l2	0.00016899	10	8	12	0.0783627
Srsf2	0.000175061	8	2	12	0.0783627
Tjp2	0.000175214	10	6	10	0.0783627
Scly	0.000183364	6	4	10	0.0783627
Hspa4l	0.000185913	2	4	10	0.0783627
Brwd1	0.00018726	8	8	12	0.0783627
Akap13	0.000187438	10	6	10	0.0783627
Ppp1r2	0.000196394	4	4	12	0.0783627
Daxx	0.00020034	10	6	12	0.0783627
Sympk	0.000200962	10	8	12	0.0783627
Neurl4	0.000200962	12	4	12	0.0783627
Ube2d3	0.000210331	12	6	12	0.0788096
Clic5	0.000210357	12	6	12	0.0788096
Sdhaf2	0.000216014	8	4	10	0.0793727
Hspb1	0.000237569	12	8	12	0.0839263
Arhgef11	0.00024567	8	8	12	0.0839263
Suco	0.00025231	2	4	12	0.0839263
Fyco1	0.000258914	10	6	10	0.0839263
Sf3b1	0.000264935	10	6	10	0.0839263
Zswim1	0.000264935	6	4	10	0.0839263
Elac1	0.000272229	2	4	12	0.0839263
Lrrc14	0.000273402	6	6	10	0.0839263
Mycbp2	0.000276977	10	6	10	0.0839263
Clk4	0.000279345	6	6	10	0.0839263
Ppp2r5e	0.00028094	2	8	10	0.0839263
Mepce	0.000282999	6	4	10	0.0839263
Gcnt1	0.000285508	10	8	12	0.0839263
Lrrc57	0.000299378	6	4	10	0.0866701
Tmed7	0.000306693	2	6	12	0.0868589
Nagk	0.000321654	10	6	12	0.0868589
Mapk8	0.000322924	12	10	12	0.0868589
Rnf2	0.000329134	12	6	12	0.0868589
Ulk3	0.000329134	4	6	12	0.0868589
Mapk8	0.000336614	12	6	12	0.0868589
Map3k4	0.000343405	10	4	10	0.0868589
LOC102642487	0.000344095	12	6	12	0.0868589
Cog1 /// LOC102641618	0.000347224	12	4	12	0.0868589
Enox2	0.00035221	4	6	10	0.0868589
Tcf3	0.00035221	4	6	10	0.0868589
Utp23	0.000354582	6	6	10	0.0868589
St3gal4	0.000361015	6	4	10	0.0873154
Tmem161b	0.000372859	10	8	12	0.087626
Fbxo3	0.00038674	2	6	12	0.087626
Sptan1	0.000396236	10	4	10	0.087626
Sdc2	0.00040154	12	8	12	0.087626
Npepps	0.000405041	10	6	10	0.087626
Aqr	0.000405041	10	4	10	0.087626
Gm21540 /// Tmed2	0.000405041	6	4	10	0.087626
Reg3b	0.000411101	8	8	12	0.087626
Gpr89	0.000413847	6	4	10	0.087626
Zfhx3	0.000413847	10	4	10	0.087626
Stag2	0.000414619	10	6	12	0.087626
Cbfa2t2	0.000422652	10	4	10	0.087626
Lynx1	0.000430222	6	8	12	0.087626
Phf3	0.000430222	4	4	12	0.087626
Epn1	0.000435719	2	8	10	0.087626
D1Ertd622e	0.000435719	8	2	10	0.087626
Lipa	0.000440262	4	6	10	0.087626
Ntn4	0.000464088	2	6	12	0.0902349
Ap2a2	0.000464088	12	6	12	0.0902349
Wdfy1	0.000467538	8	4	10	0.0902349
Atg5	0.000475138	12	6	12	0.0902826
Uhmk1	0.000477235	2	8	10	0.0902826
Tmem201	0.000502319	6	8	12	0.0939885
Bod1l	0.000510715	2	4	10	0.0939885
Anapc11	0.00053193	4	4	12	0.0939885
Cdip1	0.00053193	2	4	12	0.0939885
Zbtb6	0.000538544	12	6	12	0.0939885
Dcun1d1	0.000538967	2	2	12	0.0939885
Vps37c	0.000545569	2	4	12	0.0939885
Paqr5	0.000545569	2	4	12	0.0939885
Dock1	0.000566606	2	2	12	0.0939885
Mboat1	0.000572847	4	4	12	0.0939885
Lpp	0.000573647	10	6	10	0.0939885
Prdm2	0.000573647	10	6	10	0.0939885
Cryl1	0.000586395	4	6	10	0.0939885
Acaca	0.000586395	10	4	10	0.0939885
Pex6	0.000586395	4	6	10	0.0939885
Ldlrad4	0.000586486	2	4	12	0.0939885
Mllt4	0.000599142	10	6	10	0.0939885
Ddah1	0.000599604	2	8	10	0.0939885
Dll1	0.000600126	10	8	12	0.0939885
Sdccag3	0.000600126	2	4	12	0.0939885
Kctd2	0.000600126	8	8	12	0.0939885
Suv420h2	0.000634822	2	6	10	0.0986142
Crnkl1	0.000645999	2	6	12	0.0987448
Mb21d2	0.000645999	12	6	12	0.0987448
Lats2	0.000662149	12	6	12	0.10041
Rhobtb3	0.000678299	2	6	12	0.100467
Thpo	0.000678299	12	6	12	0.100467
Ilkap	0.000678299	6	6	12	0.100467
Atl3	0.000694449	2	6	12	0.101302
Rnf19b	0.000694539	4	6	10	0.101302
Rab2b	0.000710599	12	6	12	0.102404
Ikbkg	0.000712816	6	4	10	0.102404
Gm21571 /// Rps12 /// Rps12-ps10 /// Rps12-ps11 /// Rps12-ps12 /// Rps12-ps13 /// Rps12-ps14 /// Rps12-ps15 /// Rps12-ps16 /// Rps12-ps18 /// Rps12l2	0.000726749	4	6	12	0.103474
Zfyve19	0.000731093	4	6	10	0.103474
Ezh1	0.0007521	12	4	12	0.104853
Prrc2b	0.000767648	10	4	10	0.104853
Zfp597	0.000770243	12	6	12	0.104853
Tgfbr1	0.00077029	2	8	10	0.104853
0	0.000771385	10	8	12	0.104853
H2afz	0.000790669	4	4	12	0.104853
Zfp318	0.000804202	10	6	10	0.104853
Atxn7	0.000807693	8	10	12	0.104853
Ddx59	0.000807693	4	2	12	0.104853
Rnf41	0.000807816	10	10	12	0.104853
Dstyk	0.000807816	12	6	12	0.104853
Rsad1	0.000807816	10	6	12	0.104853
Cbx5	0.000812177	2	6	10	0.104853
Dcaf8	0.000840757	6	4	10	0.10629
Sptbn1	0.000840757	10	6	10	0.10629
Snhg1	0.000852771	6	6	10	0.10629
Chn1	0.000854644	6	4	10	0.10629
Pbx2	0.000859034	4	6	10	0.10629
Atg9b	0.000859034	6	4	10	0.10629
Hsd17b14	0.000864457	10	6	12	0.10629
Wdr19	0.000867808	10	8	12	0.10629
Baz1b	0.000877312	10	4	10	0.106769
Smg1	0.000895589	10	6	10	0.108304
Slc35a3	0.000911184	12	6	12	0.108812
Ogdh	0.000911184	8	6	12	0.108812
4930466K18Rik	0.000944946	10	8	12	0.112143
Mia2	0.000957912	12	6	12	0.11298
Tctn3	0.000974612	2	6	10	0.114064
Fam118b	0.000986529	6	4	10	0.114064
Repin1	0.000986529	4	6	10	0.114064
Plxna3	0.00100016	8	8	12	0.114064
Mphosph8	0.00100464	2	6	12	0.114064
Traf4	0.00101249	6	4	10	0.114064
Sdhaf1	0.00101249	6	4	10	0.114064
Heatr5b	0.00101979	2	4	10	0.114064
Fut2	0.00102082	12	4	12	0.114064
Fggy	0.001028	10	6	12	0.114198
Lrrc61	0.00105137	10	6	12	0.114677
Arf2	0.0010542	6	6	10	0.114677
Mpp7	0.00105816	2	2	10	0.114677
Ccdc93	0.00106441	10	6	10	0.114677
Sepsecs	0.00108125	12	4	12	0.114677
Senp8	0.00108125	2	4	12	0.114677
Rab40c	0.00109037	6	4	10	0.114677
Tyw5	0.00109627	4	6	10	0.114677
Mthfd2l	0.0011044	6	6	10	0.114677
Rnf14	0.00110828	12	8	12	0.114677
Erh /// LOC101056061	0.00110828	4	4	12	0.114677
Zfr	0.00111496	10	10	12	0.114677
Ncoa7	0.00111496	4	2	12	0.114677
Uevld	0.00111634	4	6	10	0.114677
Polr3b	0.00113532	2	4	12	0.116003
0	0.00116235	8	8	12	0.11657
Nudt13	0.00116826	4	6	10	0.11657
Bms1	0.00116826	10	4	10	0.11657
Apob	0.00116826	10	6	10	0.11657
Pign	0.00118938	12	8	12	0.11657
Ikbkg	0.00119422	4	6	10	0.11657
Zfp292	0.00119422	10	6	10	0.11657
Shisa4	0.00120914	6	2	12	0.11657
Dusp16	0.00121328	12	4	12	0.11657
2610019N06Rik	0.00121641	12	8	12	0.11657
Nucks1	0.00121641	4	4	12	0.11657
Uba2	0.00121641	4	4	12	0.11657
Lrrk1	0.00122018	10	4	10	0.11657
Capn5	0.00124073	2	8	10	0.117943
Smyd4	0.0012672	4	4	12	0.119864
0	0.00130349	2	6	10	0.122688
0	0.00134642	8	6	12	0.126108
Gna13	0.00135615	2	8	10	0.126399
Hiatl1	0.00137212	12	6	12	0.127268
Tmcc3	0.001385	2	8	10	0.127841
Wdr7	0.00140555	2	4	10	0.128177
Sft2d2	0.00140559	12	6	12	0.128177
Crbn	0.00140876	4	8	10	0.128177
Fahd2a	0.00143905	8	6	12	0.129742
Atpaf1	0.00144069	6	6	10	0.129742
Ywhag	0.00146173	4	6	10	0.129742
Fbxo42	0.00146827	12	4	12	0.129742
Wdyhv1	0.0014696	6	2	10	0.129742
Synj2	0.00147252	12	6	12	0.129742
Atp8a1	0.00147583	2	4	10	0.129742
4931414P19Rik	0.00149827	6	4	10	0.129742
Meis1	0.00151097	6	6	10	0.129742
Tmed3	0.00153482	6	4	10	0.129742
Dlgap4	0.00153482	10	4	10	0.129742
Hexdc	0.00153945	10	6	12	0.129742
Fam210a	0.00153945	12	6	12	0.129742
Ccdc132	0.00154049	10	8	12	0.129742
Mbtd1	0.00154049	6	8	12	0.129742
A430033K04Rik	0.0015588	2	6	12	0.129742
Dffa	0.00156907	2	6	10	0.129742
Ptprk	0.00157806	2	4	12	0.129742
4933411K20Rik	0.00157806	2	4	12	0.129742
Zmym2	0.00158124	2	4	10	0.129742
Cnot7	0.00161638	6	6	10	0.129742
Golga7	0.00162251	4	6	10	0.129742
Atp2c1	0.00164445	4	6	10	0.129742
Ggta1	0.00165321	4	4	12	0.129742
Snx16	0.00165321	4	4	12	0.129742
Slc25a5	0.00165321	6	4	12	0.129742
Ilvbl	0.00165321	12	4	12	0.129742
Gpc6	0.00165778	8	6	10	0.129742
Mesdc1	0.00168099	4	6	10	0.129742
Zdhhc3	0.00168099	4	6	10	0.129742
Cbl	0.00168099	10	6	10	0.129742
B3gnt1	0.00168099	4	6	10	0.129742
Erc1	0.00168666	2	4	10	0.129742
Ppil3	0.00168666	6	6	10	0.129742
Upf3b	0.00168666	6	6	10	0.129742
Taf1d	0.00168666	6	6	10	0.129742
Tbc1d15	0.00169078	12	4	12	0.129742
Nin	0.00169078	2	4	12	0.129742
Mdp1	0.00169078	10	8	12	0.129742
Bet1l	0.00171753	6	4	10	0.130313
Atp7a	0.00174233	2	4	10	0.130313
Nadk2	0.00174233	12	8	12	0.130313
Fbxl20	0.00174533	2	8	10	0.130313
Usf2	0.00175408	4	6	10	0.130313
Hs1bp3	0.00175408	6	4	10	0.130313
Sesn1	0.00175408	6	4	10	0.130313
Trp53i13	0.00175408	6	4	10	0.130313
Ctla2b	0.00176592	4	8	12	0.130313
1700047I17Rik2 /// Fam177a /// LOC100503822	0.00176642	2	4	12	0.130313
Cyp4a12a	0.00178879	12	4	12	0.131086
Pabpn1	0.00179062	6	4	10	0.131086
Pdlim5	0.00180444	2	6	10	0.131593
Dcaf7	0.00182122	2	8	10	0.132312
Tti2	0.00184107	12	8	12	0.133247
Smo	0.00189921	2	6	12	0.136937
Mob1a	0.00193759	4	6	10	0.137542
Slc9a9	0.00193759	6	4	10	0.137542
Dpy19l1	0.00196845	4	4	12	0.137542
Yy1	0.00198858	10	6	10	0.137542
Stag1	0.00199417	2	6	12	0.137542
Dennd2d	0.00199885	12	4	12	0.137542
Cstf1	0.00202025	2	4	12	0.137542
Kif3b	0.00204165	10	6	12	0.137542
Med1	0.00204165	12	6	12	0.137542
Lrp6	0.0020479	2	4	10	0.137542
Slc39a9	0.00206772	12	4	12	0.137542
Fosl1	0.00207205	4	4	12	0.137542
Pitpnm1	0.00207205	10	8	12	0.137542
Rasip1	0.00207205	10	8	12	0.137542
Ezh1	0.00208913	10	6	12	0.137542
0	0.00209182	4	4	12	0.137542
Fam168a	0.00209666	2	4	10	0.137542
Mitf	0.00211581	8	10	12	0.137542
0	0.00213661	12	6	12	0.137542
Pcca	0.00213661	12	6	12	0.137542
Mrps5	0.00213661	12	6	12	0.137542
Lphn3	0.00213661	10	6	12	0.137542
Shoc2	0.00214832	12	8	12	0.137542
Dnm2	0.00217565	8	8	12	0.137542
Pofut1	0.00218257	2	8	10	0.137542
Fbxo30	0.00218409	12	6	12	0.137542
LOC497255	0.00218409	10	6	12	0.137542
Tns3	0.00219254	10	4	10	0.137542
Ube2d2a	0.00219493	2	6	12	0.137542
Lphn3	0.00219679	10	6	10	0.137542
Slc30a7	0.00221198	12	6	12	0.137542
Wls	0.00222745	2	4	12	0.137542
Ppm1b	0.00222745	8	8	12	0.137542
Trmt5	0.00222745	12	8	12	0.137542
Mapk9	0.00224294	4	4	10	0.137542
Polr3c	0.00224294	6	6	10	0.137542
Rab22a	0.00226007	6	10	12	0.137542
Uso1	0.00227925	12	4	12	0.137542
Mcm9	0.00227925	2	8	12	0.137542
Cdc27	0.00227925	12	4	12	0.137542
Armc8	0.00227925	12	4	12	0.137542
0	0.00227925	10	8	12	0.137542
Ces2a	0.00227925	12	4	12	0.137542
Cryz	0.00227925	8	8	12	0.137542
Ddx54	0.00228177	10	2	10	0.137542
Tube1	0.0022917	6	6	10	0.137542
2810047C21Rik1 /// Gm3912	0.00229203	8	4	10	0.137542
2610034B18Rik	0.00229452	6	4	10	0.137542
Pafah1b2	0.00229452	6	4	10	0.137542
Phf20	0.00229452	10	4	10	0.137542
Aldh5a1	0.00229452	10	4	10	0.137542
AB351656	0.00229452	10	6	10	0.137542
Epm2aip1	0.00231667	2	6	10	0.137542
2900097C17Rik	0.00233106	2	4	12	0.137542
Ndufa12	0.00233106	4	4	12	0.137542
Crkl	0.00233106	12	4	12	0.137542
Rbbp7	0.00233106	4	4	12	0.137542
Kctd5	0.00234046	6	6	10	0.137542
Rbl2	0.00238098	2	8	10	0.137542
Shc1	0.00238098	2	8	10	0.137542
Arap1	0.00238286	8	8	12	0.137542
Tshz2	0.00238286	12	4	12	0.137542
Hrct1	0.00238921	2	4	10	0.137542
Dstyk	0.0023965	10	6	10	0.137542
Wnk1	0.0023965	10	6	10	0.137542
Phc3	0.0023965	10	6	10	0.137542
2510002D24Rik	0.0023965	6	4	10	0.137542
Diap2	0.00243466	2	4	12	0.137542
Larp7	0.00243466	4	4	12	0.137542
Optn	0.00243466	12	4	12	0.137542
Decr1	0.00243925	12	4	12	0.137542
Tm2d2	0.00244749	6	4	10	0.137542
D2Wsu81e	0.00244749	6	4	10	0.137542
Zbtb7b	0.00244749	4	6	10	0.137542
1700037H04Rik	0.00244749	6	4	10	0.137542
Cdk2ap1	0.00249848	6	4	10	0.139179
Dis3l2	0.00249848	10	4	10	0.139179
Htra2	0.00249848	6	4	10	0.139179
Abcg5	0.00251954	12	4	12	0.139925
Pdxdc1	0.00252652	10	6	12	0.139925
Mettl7a1	0.00254946	4	6	10	0.140788
Bcl2	0.00258605	2	6	10	0.142276
Gtf2ird1	0.0025913	6	2	12	0.142276
Glyat	0.00268067	6	4	10	0.146341
Cdk5rap1	0.00268067	6	4	10	0.146341
Tollip	0.00271555	2	2	12	0.147248
Peli1	0.00273632	10	6	12	0.147248
Entpd5	0.00273632	12	6	12	0.147248
Cebpg	0.00273632	12	6	12	0.147248
Vps26b	0.00273632	12	6	12	0.147248
Kidins220	0.00275043	2	4	10	0.147248
Lpcat4	0.00275121	4	6	10	0.147248
Ccny	0.0027602	12	8	12	0.147307
Recql	0.00278565	4	6	12	0.147307
Hipk3	0.00278565	12	6	12	0.147307
Kxd1 /// Uba52	0.00278565	10	6	12	0.147307
Wwc2	0.00282439	2	4	12	0.147307
Fosl2	0.00283418	8	8	12	0.147307
Sox13	0.0028923	4	6	10	0.147307
Creb3l2	0.0028923	10	4	10	0.147307
Myo9b	0.00289867	2	4	10	0.147307
Snta1	0.00290181	2	8	10	0.147307
Elk1	0.00290504	4	4	12	0.147307
BB212172	0.00290504	10	8	12	0.147307
Gas5	0.0029115	6	4	10	0.147307
Rpe	0.00291521	4	2	12	0.147307
Socs4	0.00293654	2	6	12	0.147307
Cutal	0.00293654	12	6	12	0.147307
Msi2	0.00293654	2	6	12	0.147307
Kcnab1	0.00293654	12	6	12	0.147307
Ermard	0.00293654	10	6	12	0.147307
Sae1	0.00293726	8	4	10	0.147307
B4galt5	0.00296284	4	6	10	0.147307
Pdx1	0.00296284	4	6	10	0.147307
D10Wsu102e	0.00296284	6	4	10	0.147307
Bcam	0.0029663	2	8	10	0.147307
Lyrm2	0.0029663	8	2	10	0.147307
Cyb5b	0.0029663	2	8	10	0.147307
1700052N19Rik	0.0029663	8	2	10	0.147307
Arfgef2	0.00297589	8	8	12	0.147307
Prrg1	0.00297589	10	8	12	0.147307
Atg4b	0.00300328	12	6	12	0.148278
Cyth3	0.00304674	12	8	12	0.148549
Atg16l2	0.00304674	10	8	12	0.148549
Ccdc85b	0.00304674	6	8	12	0.148549
H2-D1 /// H2-L	0.0030504	6	2	10	0.148549
D930015E06Rik	0.00307002	6	6	12	0.148549
9630025H16Rik /// Kpna4	0.00307002	12	6	12	0.148549
Ppap2a	0.00310268	2	4	12	0.148549
Gm10257 /// Gm12657 /// Gm6749 /// H3f3a /// H3f3b /// H3f3c	0.00310393	6	4	10	0.148549
Jrk	0.0031176	12	4	12	0.148549
Spsb2	0.0031176	8	8	12	0.148549
E430018J23Rik	0.0031176	10	8	12	0.148549
Tmem33	0.0031176	2	4	12	0.148549
Klf3	0.0031176	12	4	12	0.148549
Klhdc10	0.0031176	8	8	12	0.148549
Pcmt1	0.00313332	4	2	12	0.148663
Magi3	0.00315293	2	4	10	0.148663
Slc25a44	0.00315428	4	6	10	0.148663
Zbtb7b	0.00315975	2	8	10	0.148663
Arf3	0.00315975	2	8	10	0.148663
Notch1	0.00317447	10	4	10	0.148663
Rbm17	0.00317447	6	4	10	0.148663
Nck2	0.00324502	4	6	10	0.150311
Rest	0.00324502	10	6	10	0.150311
Ninj1	0.00324502	6	4	10	0.150311
Tmem17	0.00324502	4	6	10	0.150311
Gabpb1	0.00325931	12	8	12	0.150311
D030063E12	0.00325931	10	8	12	0.150311
Six5	0.00327258	2	2	12	0.150311
Gdpgp1	0.00327258	4	2	12	0.150311
Pomk	0.0032871	6	6	10	0.150615
Lztfl1	0.00331556	4	6	10	0.150748
Cops7b	0.00331556	6	4	10	0.150748
Celf1	0.00331556	10	4	10	0.150748
Trim37	0.00332155	6	2	10	0.150748
Snx13	0.00333016	8	8	12	0.150781
Srsf9	0.00338611	6	4	10	0.151546
Rps6kb2	0.00338611	4	6	10	0.151546
Akt1s1	0.00338611	6	4	10	0.151546
Thoc2	0.00338611	10	6	10	0.151546
Dcun1d5	0.00338672	6	6	10	0.151546
Cp	0.00339693	10	6	12	0.151647
Rpl14 /// Rpl14-ps1	0.00341816	10	2	10	0.152029
Lrrc41	0.0034214	12	4	12	0.152029
Nadsyn1	0.00345128	8	4	10	0.15218
Gm6747 /// Morf4l1	0.00345128	8	4	10	0.15218
2810047C21Rik1	0.00345128	8	4	10	0.15218
Timm17b	0.00345665	6	4	10	0.15218
Pfkp	0.00347825	2	4	10	0.152779
Tmod3	0.00350097	4	4	12	0.153424
Pdk1	0.00365457	8	8	12	0.159789
Nrf1	0.00367825	6	4	10	0.160106
Cadm4	0.00371878	12	6	12	0.160106
Tfdp2	0.00371878	2	6	12	0.160106
Snx13	0.00371878	2	6	12	0.160106
Cds2	0.00371878	2	6	12	0.160106
Snapc4	0.0037256	10	6	12	0.160106
0	0.00375647	8	10	12	0.160106
Zc3hc1	0.00377504	6	4	10	0.160106
Ptgr2	0.00377504	6	4	10	0.160106
Ppp2r3c	0.0037793	12	8	12	0.160106
Tatdn3	0.00381224	12	6	12	0.160106
Gm14057 /// Ppp1r14c	0.00381224	4	6	12	0.160106
Arhgef25	0.00381224	6	6	12	0.160106
Phip	0.00382604	2	4	10	0.160106
Tor3a	0.00382706	4	6	10	0.160106
Zranb3	0.00382706	2	6	10	0.160106
Gtf3c2	0.00384591	4	2	12	0.160106
Ccdc174	0.00386215	12	4	12	0.160106
Mkl2	0.00387184	10	4	10	0.160106
C77080	0.00390472	10	6	12	0.160106
Yy1	0.00391838	2	8	10	0.160106
Zfp316	0.00393535	2	2	12	0.160106
Manba	0.00393535	8	10	12	0.160106
Ino80d	0.00393591	2	4	10	0.160106
Usp3	0.00394309	12	8	12	0.160106
Jak3	0.00394309	8	8	12	0.160106
Aplp2	0.00394309	12	4	12	0.160106
Myo1d	0.00394309	8	8	12	0.160106
Rab27a	0.00394519	12	6	12	0.160106
Smarca4	0.00396811	10	4	10	0.160106
Dmwd	0.00396864	6	4	10	0.160106
Xpr1	0.00397368	2	6	10	0.160106
Nras	0.00399769	4	6	12	0.160106
Oaf	0.00399769	10	6	12	0.160106
St7l	0.00399769	12	6	12	0.160106
Rgs2	0.00399769	12	6	12	0.160106
C2cd2	0.00400175	2	8	10	0.160106
Tmem19	0.00400175	2	8	10	0.160106
Kif3b	0.00400175	2	8	10	0.160106
Slc43a2	0.00400175	2	8	10	0.160106
Angel2	0.00403927	12	8	12	0.160106
Cdkn2aipnl	0.00403927	4	4	12	0.160106
Raly	0.00404635	6	6	12	0.160106
Golgb1	0.00405629	2	4	10	0.160106
Mief2	0.00406543	4	6	10	0.160106
Scrn2	0.00406543	4	6	10	0.160106
Hnf4a	0.00408512	2	8	10	0.160106
Atrip	0.00409066	10	6	12	0.160106
Pde12	0.00409066	2	6	12	0.160106
Zfp275	0.00409298	10	8	10	0.160106
Cyp1b1	0.00413544	4	4	12	0.160106
Cir1	0.00413544	4	4	12	0.160106
Scamp5	0.00413544	12	4	12	0.160106
St7l	0.00413802	2	4	12	0.160106
Cebpa	0.00414751	12	4	12	0.160106
Ptpmt1	0.00416849	10	2	10	0.160106
Serf1	0.00417236	8	4	10	0.160106
Reep3	0.00418363	4	6	12	0.160106
Sec63	0.00418363	4	6	12	0.160106
Zc3h12a	0.00418363	10	6	12	0.160106
Vhl	0.00418363	10	6	12	0.160106
Ier5	0.00418363	2	6	12	0.160106
Atxn10	0.00420367	10	10	12	0.160106
Mettl21a	0.00421051	6	6	10	0.160106
5430414B19Rik	0.00423161	2	4	12	0.160106
Ciz1	0.00423161	8	8	12	0.160106
Iws1	0.00423161	8	8	12	0.160106
Snx13	0.00423161	2	4	12	0.160106
Hivep2	0.00425712	8	6	12	0.160753
Lipe	0.0042766	12	6	12	0.160852
Dcun1d3	0.0042766	2	6	12	0.160852
Ergic1	0.0043133	6	4	10	0.161191
Pvrl2	0.00432779	12	8	12	0.161191
Ints8	0.00432779	2	4	12	0.161191
Cdc37l1	0.00432779	8	8	12	0.161191
Flnb	0.00432779	8	8	12	0.161191
Fasn	0.00435582	10	4	10	0.16192
Secisbp2	0.00438255	2	2	12	0.162597
Nabp1	0.00442396	4	4	12	0.163815
Golga2	0.00445099	8	10	12	0.163923
Nsun5	0.00445262	6	4	10	0.163923
Ccndbp1	0.00445262	4	6	10	0.163923
Nsd1	0.00448511	2	4	10	0.164486
Trip12	0.00448511	2	4	10	0.164486
Atat1	0.00452013	8	8	12	0.164944
Plod2	0.00454941	10	6	10	0.164944
Zfp654	0.00454941	10	4	10	0.164944
Arid5b	0.00454941	10	4	10	0.164944
Lpp	0.00454941	10	6	10	0.164944
Tm7sf3	0.00454941	4	6	10	0.164944
Wdr61	0.00456973	8	4	10	0.165367
Atg5	0.0046163	4	4	12	0.166422
Sptlc1	0.0046163	12	4	12	0.166422
Mrgbp	0.00463217	10	8	12	0.166557
Polr2b	0.00464621	10	4	10	0.166557
4833438C02Rik	0.00464621	4	6	10	0.166557
Lysmd1	0.00468629	4	2	12	0.16768
Fbxw11	0.00471248	12	8	12	0.167987
Fam210a	0.00471248	10	8	12	0.167987
2610002J23Rik /// Klhl11	0.004743	10	4	10	0.168624
Dr1	0.00474798	2	4	12	0.168624
Dcun1d2	0.00477404	2	4	12	0.169235
Ribc1	0.00480059	10	10	12	0.169861
Pdk2	0.00482438	2	8	10	0.170302
Elmsan1	0.00483241	8	10	12	0.170302
Prkd3	0.0048398	10	4	10	0.170302
Csrnp2	0.00494902	8	6	10	0.173825
Gtpbp8	0.0049671	8	4	10	0.17414
Bnc1	0.00497959	2	4	12	0.174258
Lysmd4	0.00500687	2	6	12	0.174893
Pi4k2a	0.00503879	2	8	10	0.175687
Kat6a	0.00505304	8	8	12	0.175862
Ap1s3	0.00506252	4	6	12	0.175872
Ormdl1	0.00507964	6	6	10	0.176146
Adi1	0.0051321	6	8	12	0.177111
0	0.0051321	6	8	12	0.177111
Rprd1a	0.00513525	12	6	12	0.177111
Zfp148	0.00517758	12	2	12	0.177915
Denr	0.00525145	2	4	12	0.177915
Mettl21a	0.00525145	10	8	12	0.177915
Igfbp4	0.00525321	2	8	10	0.177915
Gm6910 /// Rybp	0.00525779	10	10	12	0.177915
Nktr	0.00525779	8	10	12	0.177915
Gskip	0.00526364	12	6	12	0.177915
Ttc3	0.00527031	10	6	10	0.177915
Irak3	0.00527031	6	4	10	0.177915
Pmm2	0.00527031	4	6	10	0.177915
Zbtb40	0.00527031	10	4	10	0.177915
Gorab	0.00527031	6	4	10	0.177915
Stx18	0.00531217	2	4	12	0.179012
Cdc27	0.00532743	4	4	10	0.17921
Skp2	0.00539202	2	6	12	0.180766
Vma21	0.00540206	6	4	10	0.180766
Sdccag3	0.00540206	6	4	10	0.180766
Lpin1	0.00542036	2	4	10	0.181061
Ing1	0.00544173	4	8	12	0.181347
Etv3	0.00545132	2	4	10	0.181347
Tmem29	0.00548639	4	2	12	0.181347
0	0.00548639	8	2	12	0.181347
Nckipsd	0.0055204	2	6	12	0.181347
Crnkl1	0.0055204	12	6	12	0.181347
Tprn	0.0055204	10	6	12	0.181347
Zbtb5	0.0055204	2	6	12	0.181347
43166	0.00552275	8	10	12	0.181347
Gramd3	0.00552562	8	4	10	0.181347
Exosc4	0.00553382	6	4	10	0.181347
Nt5c2	0.0055713	10	8	12	0.181347
Cpne3	0.0055713	8	8	12	0.181347
Rora	0.0055713	10	8	12	0.181347
Ywhaz	0.0055713	4	4	12	0.181347
Ulk2	0.00564878	12	6	12	0.18307
Eif4a2	0.00564878	10	6	12	0.18307
Rasal1	0.00569797	10	4	12	0.18307
Zfp260	0.00569797	12	8	12	0.18307
Atp7a	0.00569911	2	4	10	0.18307
Tmem64	0.00570086	4	4	12	0.18307
Erlin2	0.00570086	12	4	12	0.18307
Gng12	0.00570086	8	8	12	0.18307
Zfp68	0.00577716	2	6	12	0.185053
Hoxb3	0.00579734	4	6	10	0.185053
Rora	0.00579734	10	6	10	0.185053
Nub1	0.00583043	8	8	12	0.185053
Vwa5a	0.00583043	2	4	12	0.185053
Eif2s1	0.00583043	4	4	12	0.185053
Nub1	0.00583043	12	4	12	0.185053
Nr1i2	0.00587352	10	8	12	0.186112
Sephs2	0.00590554	6	6	12	0.186508
Ovca2	0.00590554	10	6	12	0.186508
Mrpl51	0.0059469	4	4	10	0.186685
Eif4e	0.0059469	6	6	10	0.186685
Dennd1b	0.0059469	2	4	10	0.186685
Slain2	0.00595999	2	4	12	0.186685
Thnsl1	0.00595999	12	8	12	0.186685
Nphp1	0.00601678	4	10	12	0.188155
Ank1	0.00606085	10	4	10	0.188303
Bfar	0.00606085	10	4	10	0.188303
Prkca	0.00606085	10	6	10	0.188303
Cp	0.00606953	10	6	12	0.188303
Pip5k1b	0.00607079	2	4	10	0.188303
Rbm5	0.00608956	8	8	12	0.188383
Vnn1	0.00613749	8	4	10	0.188383
Dicer1	0.00618909	6	8	12	0.188383
Bpgm	0.00619261	4	6	10	0.188383
Unc50	0.00619261	6	4	10	0.188383
N4bp2	0.00619261	10	4	10	0.188383
Magi3	0.00619261	10	6	10	0.188383
Adipor1	0.00619261	6	4	10	0.188383
Tnrc6a	0.00619261	10	4	10	0.188383
Ptdss2	0.00619261	4	6	10	0.188383
Utrn	0.00619261	10	6	10	0.188383
Rps25	0.00619468	6	6	10	0.188383
Ebpl	0.00621912	8	8	12	0.188383
Bcl2l11	0.00622127	8	6	12	0.188383
Hgsnat	0.00622127	12	6	12	0.188383
Kcnk5	0.00623821	12	4	12	0.188597
Cnksr3	0.00627049	10	8	12	0.188988
Tmod3	0.00627091	2	6	10	0.188988
Cant1	0.00630856	2	8	10	0.189107
Smc1a	0.00632437	10	4	10	0.189107
0	0.00632437	10	4	10	0.189107
Inip	0.00632437	6	4	10	0.189107
Mettl7a1	0.00632437	4	6	10	0.189107
Klf3	0.00634869	12	8	12	0.189538
Ptdss2	0.006373	10	6	12	0.189967
Mbnl2	0.0064457	10	8	10	0.191251
Evl	0.00645613	6	4	10	0.191251
Smarcd2	0.00645613	4	6	10	0.191251
Dnajc5	0.00645613	4	6	10	0.191251
Lman1	0.00652474	2	6	12	0.192985
Endod1	0.00654536	4	6	10	0.193296
Gm3579	0.00658285	2	8	10	0.193653
B4galt4	0.00658478	12	8	12	0.193653
Rcor1	0.00658788	10	6	10	0.193653
4930526I15Rik	0.00659936	10	8	12	0.193693
Nap1l3	0.00666582	2	8	10	0.195343
Rdh11	0.00671999	2	8	10	0.196328
Wbp1l	0.00671999	2	8	10	0.196328
Pfkp	0.00676231	10	6	10	0.197263
Zkscan1	0.00681157	8	6	12	0.198397
Tial1	0.00682215	6	6	10	0.198403
Telo2	0.00685548	4	6	12	0.199069
Cep350	0.00689629	10	6	10	0.1996
Zfp513	0.0069133	12	8	12	0.1996
0	0.00693135	8	4	12	0.1996
Lactb2	0.00694026	4	6	10	0.1996
Trabd	0.00694026	4	6	10	0.1996
Mal	0.00697996	12	6	12	0.1996
Vangl1	0.00697996	6	6	12	0.1996
Exoc6b	0.00697996	10	6	12	0.1996
Zfp191	0.00697996	2	6	12	0.1996
Tm2d2	0.00698256	8	2	10	0.1996
C2cd3	0.00698865	8	2	12	0.1996
Cdadc1	0.00710463	2	4	12	0.201891
Usp30	0.00710463	2	4	12	0.201891
Aimp1	0.00711822	6	4	10	0.201891
Tiprl	0.00711822	6	4	10	0.201891
Ergic2	0.00712172	8	10	12	0.201891
Letmd1	0.00714126	6	6	10	0.201952
Asap2	0.00715494	2	4	10	0.201952
Gm12372 /// Taf9	0.00715559	6	6	10	0.201952
Xpr1	0.00720704	2	6	12	0.202628
Rgs2	0.00723485	12	4	12	0.202628
Hspb6	0.00726707	8	10	12	0.202628
Ccz1	0.00727792	6	8	12	0.202628
Slc35f6	0.00727792	10	8	12	0.202628
Lipt1	0.00727792	12	8	12	0.202628
Pmm2	0.00728343	6	10	12	0.202628
Mrps23	0.00729617	4	6	10	0.202628
Nbr1	0.00729617	10	6	10	0.202628
Adipor1	0.00729617	4	6	10	0.202628
Ccdc163	0.00729617	4	6	10	0.202628
Lnpep	0.00732133	2	4	10	0.203031
Tmem38b	0.00735648	8	10	12	0.203262
Kdm1a	0.00735764	12	2	12	0.203262
Saa2	0.00736623	12	4	12	0.203262
Rprd2	0.00738282	12	6	12	0.203262
Clcn7	0.00738282	10	6	12	0.203262
Hipk1	0.0074512	12	8	12	0.203917
Dlat	0.0074512	4	4	12	0.203917
Phospho2	0.0074512	12	8	12	0.203917
Syne1	0.0074512	8	8	12	0.203917
Zbed6 /// Zc3h11a	0.00747413	10	4	10	0.203917
Chmp5	0.00747413	6	4	10	0.203917
Rgmb	0.00754039	2	2	12	0.203917
Slc35a5	0.00754705	2	4	12	0.203917
2010107G23Rik	0.00754747	4	6	10	0.203917
1190007I07Rik /// 1810014B01Rik	0.00755861	2	6	12	0.203917
Ttc7b	0.00755861	12	6	12	0.203917
Naga	0.00755861	10	6	12	0.203917
Cs	0.00761734	10	2	10	0.203917
Spin1	0.00762448	12	4	12	0.203917
Saa1	0.00762448	12	4	12	0.203917
Ankzf1	0.00762448	6	8	12	0.203917
Gorasp1	0.00762448	8	8	12	0.203917
Sft2d2	0.00762448	12	4	12	0.203917
Hist3h2a /// Trim17	0.00762448	8	8	12	0.203917
Hp	0.00762448	8	8	12	0.203917
0	0.00765208	4	6	10	0.203917
Ikbkg	0.00765208	4	6	10	0.203917
Ctdsp2	0.00765208	10	4	10	0.203917
Als2cl	0.00767973	2	8	10	0.204084
Vps37c	0.00767973	10	2	10	0.204084
Usp22	0.00773439	8	6	12	0.204659
Dnal1	0.00773439	6	6	12	0.204659
Mpp5	0.00777604	2	4	10	0.204659
Smarcal1	0.00779777	10	8	12	0.204659
Ngly1	0.00779777	12	4	12	0.204659
Ptpn13	0.00779777	12	4	12	0.204659
Cxcl1	0.00779777	8	8	12	0.204659
Ddx39	0.00779777	4	4	12	0.204659
R3hdm2	0.00779777	12	4	12	0.204659
Trmt1	0.00782051	6	6	10	0.204943
Pde4dip	0.00783004	10	6	10	0.204943
Pnpla2	0.00791017	10	6	12	0.205632
Ap3m1	0.00791017	12	6	12	0.205632
Srxn1	0.00791017	12	6	12	0.205632
Zfp157	0.00791017	2	6	12	0.205632
Arhgap6	0.00791017	2	6	12	0.205632
Relb	0.00795075	12	4	12	0.206372
Ywhab	0.00797105	4	4	12	0.206372
Snrpe	0.00797105	4	4	12	0.206372
2410002F23Rik	0.00798691	6	6	10	0.206503
Gpr137	0.0080288	2	8	10	0.206658
Fn1	0.00806207	10	4	10	0.206658
Bloc1s6	0.00808595	10	6	12	0.206658
Zfp112	0.00808595	2	6	12	0.206658
Igsf23	0.00808595	12	6	12	0.206658
Sdf4	0.00808595	10	6	12	0.206658
Cidec	0.00808595	12	6	12	0.206658
Trim46	0.00809213	2	2	12	0.206658
Coprs	0.00810415	6	6	10	0.206658
Arhgef17	0.00811259	2	2	10	0.206658
Rap2b	0.00814433	4	8	12	0.206658
Rps11	0.00814433	4	4	12	0.206658
Ybx3	0.00814433	4	4	12	0.206658
Zdhhc17	0.00814433	2	4	12	0.206658
Rcan1	0.00816439	4	6	10	0.20689
Bpnt1	0.00817597	4	6	10	0.20689
Dbndd2	0.00818595	6	4	10	0.20689
Ms4a4b	0.00826173	2	6	12	0.20853
Utp23	0.00833145	4	4	12	0.209042
Hipk1	0.00836298	2	6	10	0.209042
Ddi2	0.00836298	2	6	10	0.209042
Alkbh6	0.00836298	8	4	10	0.209042
Mylk	0.00836391	10	4	10	0.209042
Stx6	0.00836391	4	6	10	0.209042
Tbc1d20	0.00837788	2	8	10	0.209042
Abhd12	0.00837788	2	8	10	0.209042
Khnyn	0.00838052	12	4	12	0.209042
Bag6	0.00843345	10	4	10	0.209233
Rbm14-rbm4 /// Rbm4	0.00843751	10	6	12	0.209233
Klhl8	0.00845118	2	6	12	0.209233
Pde4d	0.00845995	8	10	12	0.209233
Mrps11	0.00846531	6	2	10	0.209233
Setx	0.00847243	2	6	12	0.209233
Bptf	0.00848149	10	6	10	0.209233
Mgat1	0.00854186	6	4	10	0.209233
Acat1	0.00854186	6	4	10	0.209233
Tpr	0.00854186	10	4	10	0.209233
Gls	0.00854186	10	4	10	0.209233
Nckap1	0.00854186	10	6	10	0.209233
Fndc3b	0.00854186	10	6	10	0.209233
Coq3	0.00854695	4	2	12	0.209233
Nbeal2	0.00855242	2	8	10	0.209233
Stx2	0.00864167	6	8	10	0.210194
Naa20	0.00867425	6	4	10	0.210194
Gle1	0.00867425	6	4	10	0.210194
Srrm1	0.00871885	2	6	10	0.210194
Ttf1	0.00871885	2	6	10	0.210194
Mcrs1	0.00871982	6	4	10	0.210194
Slc25a10	0.00871982	4	6	10	0.210194
Nkap	0.00871982	4	6	10	0.210194
Tenm3	0.00871982	10	4	10	0.210194
Ncoa3	0.00871982	10	4	10	0.210194
Braf	0.00871982	10	6	10	0.210194
Exoc6b	0.00872696	2	8	10	0.210194
Cks2	0.00874572	4	8	12	0.210194
Cab39	0.00874572	10	6	12	0.210194
Fam134c	0.00880489	10	8	10	0.211351
Gm3579	0.00889679	2	6	10	0.213288
Cfl2	0.00907653	2	6	12	0.217183
Rpap2	0.00909333	6	6	10	0.217183
Srsf3	0.00909333	6	6	10	0.217183
Zfp945	0.00913641	12	6	12	0.217559
Pole4	0.00914325	12	6	12	0.217559
Tgfbrap1	0.00914325	12	2	12	0.217559
Serinc3	0.00915683	4	6	10	0.217611
Mob3c	0.0091956	6	2	12	0.217963
Plrg1	0.00920459	4	4	12	0.217963
Hmgxb4	0.00922417	4	6	10	0.217963
Ndufa2	0.00924006	4	4	12	0.217963
Mep1b	0.00924006	12	4	12	0.217963
0	0.00924006	12	8	12	0.217963
Rnf39	0.00930938	12	6	12	0.219032
Sf3a3	0.00931173	6	6	10	0.219032
Mospd3	0.00931978	2	8	10	0.219032
Frat2	0.00936427	10	6	12	0.219807
Ubac2	0.00943381	6	4	10	0.220581
Abhd5	0.0094347	12	8	12	0.220581
Usp30	0.0094535	10	8	12	0.220581
Mtx3	0.00945494	2	4	12	0.220581
Taf2	0.00945494	2	4	12	0.220581
Mrpl41	0.00952238	10	2	10	0.221248
Zcchc14	0.00953691	8	6	10	0.221248
Mlxip	0.00953691	8	6	10	0.221248
Hist1h3b /// Hist1h3c /// Hist1h3d /// Hist1h3e /// Hist1h3f /// Hist2h3b /// Hist2h3c1 /// Hist2h3c2	0.00954146	4	6	10	0.221248
Clk4	0.00954146	6	4	10	0.221248
Zbtb20	0.00964345	2	2	10	0.22297
Mapk11	0.00966482	12	8	12	0.22297
Tmtc4	0.00966482	2	4	12	0.22297
Mettl13	0.00966983	12	4	12	0.22297
Rab22a	0.00967406	8	8	12	0.22297
LOC102641972 /// Ptprj	0.0097251	2	8	10	0.223595
AI661453	0.00972756	8	10	12	0.223595
Mir17hg /// Mir92-1	0.0097587	6	6	10	0.223595
Slc12a6	0.0097587	2	4	10	0.223595
Tmem192	0.00975967	4	6	10	0.223595
Dock11	0.00978	10	6	10	0.223792
Lhx6	0.00985309	4	4	10	0.224366
Eral1	0.00985309	6	6	10	0.224366
Myef2	0.00989493	4	4	12	0.224366
0	0.00989493	10	8	12	0.224366
Mea1	0.00989493	12	4	12	0.224366
Snupn	0.00989493	6	8	12	0.224366
Zfp647	0.00989493	2	4	12	0.224366
Fam179b	0.00989903	10	8	12	0.224366
Chd8	0.00995378	2	2	10	0.22534
Rpl41	0.00998049	6	6	10	0.22541
1110012L19Rik	0.00998049	6	6	10	0.22541
2810474O19Rik	0.0100066	6	10	12	0.225627
Scarf2	0.0100185	6	4	10	0.225627
Rbm33	0.0100255	2	6	12	0.225627
Cpd	0.0100627	2	4	10	0.22574
Wdr5b	0.0100877	4	4	10	0.22574
Rps20	0.010124	4	4	12	0.22574
Adh1	0.010125	12	4	12	0.22574
Prepl	0.010125	8	8	12	0.22574
0	0.010125	2	4	12	0.22574
Acp1	0.010125	4	4	12	0.22574
Mtap	0.010125	4	4	12	0.22574
Dip2a	0.010175	2	2	10	0.226589
Tax1bp1	0.0101908	12	2	12	0.226668
Rnf4	0.0102023	6	6	10	0.226668
Sh3bgrl3	0.0102571	4	6	10	0.226726
Irf3	0.0102642	12	6	12	0.226726
Zbtb8a	0.0102642	12	6	12	0.226726
Tm9sf2	0.0102642	12	6	12	0.226726
Itgb5	0.0102642	12	6	12	0.226726
Nt5c2	0.0102785	12	4	12	0.226779
Elf3	0.0103552	12	4	12	0.22716
Trim41	0.0103552	8	8	12	0.22716
Tox	0.0103552	8	8	12	0.22716
Rc3h2	0.0103552	8	4	12	0.22716
Ccdc51	0.0103552	12	8	12	0.22716
Atp6v0a2	0.0103882	8	2	10	0.227623
Rab14	0.0104224	2	2	12	0.227626
Slk	0.0104241	2	4	10	0.227626
Pcnp	0.0104241	6	6	10	0.227626
Zfyve27	0.0104501	12	4	12	0.227785
Dnm1l	0.0104791	12	6	12	0.227785
Serpinb8	0.0104956	6	4	10	0.227785
Lemd2	0.0105029	10	6	12	0.227785
Bcl2l12	0.0105029	12	6	12	0.227785
Gm5595	0.0105029	12	6	12	0.227785
Psma1	0.0105853	4	8	12	0.228793
Cmtr2	0.0105853	2	4	12	0.228793
Atp1b1	0.0105853	8	8	12	0.228793
Adam15	0.0106092	2	8	10	0.228968
Pds5b	0.0106174	2	2	10	0.228968
Zik1	0.010654	6	2	12	0.228983
Chpt1	0.010654	8	10	12	0.228983
Zfp36l2	0.010654	12	2	12	0.228983
Iqgap1	0.0107341	10	6	10	0.229866
Ubxn2a	0.0107416	12	6	12	0.229866
Sel1l	0.0107416	12	6	12	0.229866
Psme4	0.0107485	2	2	10	0.229866
Nmt2	0.0107571	2	8	12	0.229866
Txnip	0.0108154	12	4	12	0.229866
Fundc2	0.0108154	12	8	12	0.229866
Pkig	0.0108154	4	8	12	0.229866
Nucks1	0.0108154	4	4	12	0.229866
Slc11a2	0.0108154	12	4	12	0.229866
Mtus1	0.0108637	8	10	12	0.230636
Yipf4	0.0109727	4	6	10	0.231568
Igf2bp3	0.0109803	8	6	12	0.231568
Hibadh	0.0109803	10	6	12	0.231568
Fam210a	0.0109803	12	6	12	0.231568
Pcyox1	0.0109803	4	6	12	0.231568
Spats2l	0.0109803	12	6	12	0.231568
Tcn2	0.0110072	8	8	12	0.23188
Atp2c1	0.0111172	8	10	12	0.233939
Trim26	0.0112112	4	6	10	0.234531
Ap3s2	0.0112112	4	6	10	0.234531
Armc5	0.0112112	6	4	10	0.234531
Jak1	0.0112112	10	6	10	0.234531
43165	0.0112112	10	6	10	0.234531
Rac3	0.011219	8	6	12	0.234531
Ggta1	0.0112756	4	4	12	0.235457
Tmem87a	0.011312	8	4	10	0.23596
Slc25a28	0.0114498	6	4	10	0.237021
Brd8	0.0114498	6	4	10	0.237021
Dda1	0.0114498	6	4	10	0.237021
Mrps27	0.0114498	6	4	10	0.237021
Gemin7	0.0114498	6	4	10	0.237021
L3mbtl3	0.0114498	10	4	10	0.237021
Becn1	0.0114498	6	4	10	0.237021
Ccdc32	0.0115057	6	4	12	0.237922
Uba3	0.0115321	12	8	12	0.23821
Elac1	0.0116397	12	6	12	0.23988
Pigk	0.0116858	12	6	12	0.23988
Nedd1	0.0116859	4	4	12	0.23988
Rbck1	0.0116883	6	4	10	0.23988
Mfsd1	0.0116883	4	6	10	0.23988
Nfix	0.0116883	6	4	10	0.23988
Rpl13a	0.0117384	6	6	10	0.240649
Osbpl7	0.0118194	2	2	10	0.242051
Sh3bgrl2	0.0118356	4	4	12	0.242123
Rfx2	0.0119029	12	10	12	0.24269
Anxa11 /// Gm2260 /// Gm2274	0.0119268	4	6	10	0.24269
Atg101	0.0119268	6	4	10	0.24269
Pura	0.0119268	10	6	10	0.24269
Tpcn1	0.0119268	4	6	10	0.24269
R3hdm1	0.011964	12	4	12	0.243188
Gys1	0.0120318	2	4	10	0.244281
Hdhd3	0.0120434	12	4	12	0.244281
Ccsap	0.0120718	4	10	12	0.244599
Dnajb6	0.0121002	4	6	10	0.244654
Cmtm3	0.0121002	6	6	10	0.244654
Ndrg1	0.0121391	8	8	12	0.244922
Leng9	0.0121391	2	4	12	0.244922
Ube2e2	0.0121665	10	8	12	0.245217
Smad3	0.0121932	12	2	12	0.245496
Dcun1d3	0.0122189	12	6	12	0.245724
Ypel1	0.0122423	8	8	12	0.245724
Rfesd	0.012256	12	4	12	0.245724
Prps2	0.012256	4	8	12	0.245724
Adhfe1	0.0123182	12	6	12	0.246713
Plekha5	0.0123342	2	4	12	0.246774
Tspyl2	0.0123657	6	6	10	0.247137
Arrdc4	0.0123782	4	6	10	0.247137
Cnih4	0.0124425	4	4	12	0.247904
Dusp22	0.0124425	8	8	12	0.247904
Ctsb	0.0124617	8	4	10	0.248026
Mtmr9	0.0125337	2	8	10	0.248569
Dcaf15	0.0125399	10	6	12	0.248569
Ano10	0.012541	10	8	12	0.248569
Gm14586 /// Rps17	0.012541	6	8	12	0.248569
Fryl	0.0126502	2	4	10	0.250152
Trappc8	0.0126502	8	6	10	0.250152
Meis3	0.0126956	6	4	10	0.250152
2310001H17Rik	0.0126956	4	6	10	0.250152
Spryd4	0.0126956	6	4	10	0.250152
Stambp	0.0127086	12	6	12	0.250152
Tug1	0.0127299	2	4	12	0.250152
Ppme1	0.012746	8	8	12	0.250152
Fbxo38	0.012746	10	8	12	0.250152
Gm10349 /// Gm9386 /// Nutf2 /// Nutf2-ps1	0.0127518	4	4	12	0.250152
Tm7sf3	0.0127738	8	10	12	0.250328
Plod1	0.0127987	12	4	12	0.250559
Entpd5	0.0128122	2	8	10	0.250566
Apoc3	0.012826	12	4	12	0.250579
Tmem2	0.0129122	2	4	10	0.251232
Tmem68	0.0129252	6	6	10	0.251232
Flcn	0.0129252	6	6	10	0.251232
Cmip	0.0129252	10	4	10	0.251232
Zfp263	0.0129252	6	6	10	0.251232
Kif3b	0.013013	4	6	10	0.251601
Hhex	0.013013	4	6	10	0.251601
Trp53bp1	0.013013	10	4	10	0.251601
3110009F21Rik	0.0130194	4	4	12	0.251601
Fkbp7	0.0130495	4	4	12	0.251601
Ndrg1	0.0130495	12	4	12	0.251601
Icmt	0.0130495	8	8	12	0.251601
Vkorc1l1	0.0130495	2	4	12	0.251601
Fyttd1	0.0130641	10	10	12	0.251629
Capn1	0.0130907	2	8	10	0.251634
Arl5a	0.0130907	2	8	10	0.251634
Zfp91 /// Zfp91Cntf	0.013111	4	4	12	0.251771
2310001H17Rik	0.0131342	2	4	10	0.251963
Lsm12	0.0131835	2	6	12	0.252655
Atxn7	0.0133385	12	4	12	0.253324
Rab27b	0.013353	2	4	12	0.253324
Apoa1	0.013353	12	4	12	0.253324
Fos	0.013353	12	4	12	0.253324
Pddc1	0.013353	12	4	12	0.253324
Saa1	0.013353	12	4	12	0.253324
Polg2	0.013353	10	8	12	0.253324
Tial1	0.013353	10	8	12	0.253324
Slc25a46	0.0133545	4	2	12	0.253324
Mcm9	0.0133545	12	10	12	0.253324
Igfbp4	0.0133692	2	8	10	0.253324
Ywhag	0.0133775	2	6	12	0.253324
Prdx5	0.0135051	10	6	12	0.254478
Eif2s3x	0.0135051	2	6	12	0.254478
Ube2d3	0.0135051	12	6	12	0.254478
Coa5	0.0135051	12	6	12	0.254478
0	0.0135051	10	6	12	0.254478
Fech	0.0136478	8	2	10	0.255567
Cks2	0.0136564	4	8	12	0.255567
Tshz2	0.0136564	12	4	12	0.255567
2310047K21Rik	0.0136564	10	8	12	0.255567
Asb7	0.0136564	10	8	12	0.255567
Nt5dc3	0.0136564	12	4	12	0.255567
LOC101055761 /// Tma7 /// Tma7-ps	0.0136564	4	8	12	0.255567
Exoc6	0.0136846	10	8	12	0.255843
Ace2	0.0137263	10	8	12	0.256372
Tmem33	0.0137502	10	4	10	0.256567
Plxna2	0.0137926	2	4	10	0.256816
Htt	0.0138266	8	6	12	0.256816
Fgfr1op2	0.0138841	12	8	12	0.256816
Atxn3	0.0139009	10	6	12	0.256816
Ublcp1	0.0139117	4	8	12	0.256816
Slc25a23	0.0139263	2	8	10	0.256816
Kidins220	0.0139488	10	6	10	0.256816
Fam111a	0.0139599	4	8	12	0.256816
Reg3b	0.0139599	8	8	12	0.256816
Col4a3bp	0.0139599	2	4	12	0.256816
Zfp593	0.0139599	12	8	12	0.256816
Pgs1	0.0139599	10	8	12	0.256816
Sec16a	0.0139651	10	6	10	0.256816
Fbxl5	0.0139651	4	6	10	0.256816
Plxna2	0.0139651	10	6	10	0.256816
Mrps9	0.014086	6	6	10	0.258293
Mettl6	0.014086	6	6	10	0.258293
Golga4	0.014086	2	4	10	0.258293
0	0.0141482	6	6	12	0.258915
Gsdmd	0.0141482	10	6	12	0.258915
Trpc2 /// Xndc1	0.0142254	6	2	12	0.258915
Alkbh8	0.0142254	2	2	12	0.258915
Zmym3	0.0142254	8	2	12	0.258915
Tbc1d15	0.0142634	12	4	12	0.258915
Ulk2	0.0142634	2	4	12	0.258915
Vps53	0.0142825	10	6	10	0.258915
Dnmt3a	0.0142825	10	4	10	0.258915
Commd10	0.0142825	4	6	10	0.258915
Klhl28	0.0142825	10	6	10	0.258915
Stc1	0.0142825	10	6	10	0.258915
Dag1	0.0143075	2	2	10	0.258981
Glg1	0.0143379	10	6	10	0.258981
Triobp	0.0143507	12	4	12	0.258981
Dancr	0.0143795	4	4	10	0.258981
Ms4a10	0.0143808	10	6	12	0.258981
Wipi2	0.0143866	10	10	12	0.258981
Uggt2	0.0143866	2	4	12	0.258981
Bcl9	0.0144156	10	4	10	0.258981
Hdac5	0.0144697	10	6	12	0.258981
Snx18	0.0144697	2	6	12	0.258981
Acin1	0.0144697	2	6	12	0.258981
Pvrl2	0.0144697	10	6	12	0.258981
Dcun1d5	0.0144697	12	6	12	0.258981
Magef1	0.0144895	2	2	12	0.258981
Vopp1	0.0144895	2	2	12	0.258981
Ppp6r3	0.0145157	12	2	12	0.259207
Ubn2	0.0145669	8	8	12	0.259498
Golt1b	0.0145669	4	4	12	0.259498
Pip4k2c	0.0145999	4	6	10	0.259498
Dnmt1	0.0145999	10	4	10	0.259498
Dido1	0.0145999	10	6	10	0.259498
Arnt	0.0146263	2	8	10	0.259669
Hps4	0.0146729	6	6	10	0.259669
Anp32a	0.0146897	4	4	10	0.259669
Tcn2	0.0147153	10	6	12	0.259669
Klhdc3	0.0147153	6	6	12	0.259669
Nupl1	0.0147519	6	2	10	0.259669
Kti12	0.0147913	2	6	12	0.259669
Wbp11	0.0147913	2	6	12	0.259669
Lrp5	0.0147913	6	6	12	0.259669
Tmem63b	0.0147913	6	6	12	0.259669
Kat7	0.0148818	2	6	10	0.259669
Pdzrn3	0.0149173	10	6	10	0.259669
Zfhx3	0.0149173	10	6	10	0.259669
Hnrnpu	0.0149173	10	4	10	0.259669
Arl8a	0.0149173	4	6	10	0.259669
Mrpl44	0.0149173	6	4	10	0.259669
Zfp787	0.0149173	4	6	10	0.259669
Adrbk1	0.0149173	4	6	10	0.259669
Stx6	0.0149173	4	6	10	0.259669
Rbm27	0.0149896	10	4	10	0.259669
Trim44	0.0150204	2	8	10	0.259669
Vma21	0.0150354	6	6	10	0.259669
Ralgapa1	0.0150479	2	2	10	0.259669
Mul1	0.0150486	2	6	12	0.259669
Amn1	0.0150497	12	6	12	0.259669
Khdrbs1	0.0150563	6	6	10	0.259669
Zfp606	0.0151062	10	8	12	0.259669
Pgrmc2	0.0151062	12	8	12	0.259669
Farp2	0.0151128	12	6	12	0.259669
0	0.0151128	12	6	12	0.259669
Ptplb	0.0151128	2	6	12	0.259669
Fam114a2	0.0151128	8	6	12	0.259669
Fmo2	0.0151128	12	6	12	0.259669
Cdv3	0.0151738	4	4	12	0.259669
Ly6a	0.0151919	2	6	10	0.259669
Fmr1	0.0151919	2	6	10	0.259669
Efna1	0.015214	8	10	12	0.259669
Rfx7	0.015214	8	2	12	0.259669
Fyttd1	0.015214	4	2	12	0.259669
Smarcc1	0.0152347	10	4	10	0.259669
Akt2	0.0152347	6	4	10	0.259669
Cux1	0.0152347	10	6	10	0.259669
Arl2bp	0.0152347	4	6	10	0.259669
Nipbl	0.0152347	10	6	10	0.259669
Irs2	0.0152347	10	4	10	0.259669
AK077428 /// Gm16536 /// Gm16536	0.0152347	10	4	10	0.259669
Fra10ac1	0.0153228	4	2	12	0.260938
Tm2d1	0.0153642	2	6	12	0.26141
Pkp4	0.0154177	12	4	12	0.261672
Arid5b	0.0154209	2	4	10	0.261672
Ralgds	0.0154209	2	4	10	0.261672
Use1	0.0154344	6	6	12	0.261672
Cox17	0.0155038	4	8	12	0.26204
Bak1	0.0155521	4	6	10	0.26204
Seh1l	0.0155521	6	4	10	0.26204
Zfp462	0.0155521	10	4	10	0.26204
Calm1 /// Calm2 /// Calm3	0.0155521	4	6	10	0.26204
Ptpn11	0.0155521	10	4	10	0.26204
Phf20l1	0.0155521	10	4	10	0.26204
Brwd3	0.0156181	2	4	10	0.262921
Alg12	0.0157002	2	4	12	0.26369
4930453N24Rik	0.0157186	2	6	12	0.26369
Haus2	0.0157186	2	6	12	0.26369
Slc25a29	0.0157559	10	6	12	0.26369
Hist3h2a	0.0157603	2	4	12	0.26369
BC021614	0.0157604	12	4	12	0.26369
Sel1l3	0.0157604	10	8	12	0.26369
Ppp1cc	0.0158695	6	4	10	0.264888
Memo1	0.0158713	2	4	12	0.264888
Dedd	0.0158972	6	6	10	0.264888
Gng12	0.0159013	12	4	12	0.264888
Tiam2	0.0159013	10	8	12	0.264888
Arih2	0.0159327	6	4	10	0.265066
Usp5	0.0159397	6	4	12	0.265066
Fbxo3	0.0160683	2	8	10	0.26674
Ptprs	0.0160683	2	8	10	0.26674
Efna1	0.0160958	12	4	12	0.266964
Stx16	0.0161356	12	4	12	0.267161
Zmym3	0.0161356	12	4	12	0.267161
Met	0.0161919	2	4	10	0.267861
Papola	0.0162988	12	8	12	0.268497
Ano6	0.0162988	8	8	12	0.268497
Cpt1a	0.0162988	8	8	12	0.268497
Ikbkb	0.0163007	6	2	12	0.268497
Ddx46	0.0163007	8	10	12	0.268497
Trak1	0.0164176	2	8	10	0.270191
Npcd /// Nptxr	0.0164616	4	10	12	0.270681
Pcyt1a	0.0164811	2	4	12	0.270769
Syap1	0.0166271	4	8	12	0.27129
Nr4a1	0.0166629	10	10	12	0.27129
Ube2d1	0.0166629	2	2	12	0.27129
Hars	0.0166629	4	2	12	0.27129
Gm21596 /// Gm6115 /// Hmgb1 /// LOC102635075	0.0166629	6	2	12	0.27129
Cln3	0.0166964	12	4	12	0.27129
Adnp2	0.0166964	12	4	12	0.27129
Vps18	0.0166983	6	4	10	0.27129
Mgrn1	0.0167585	2	8	10	0.27129
Nap1l2	0.016761	2	6	12	0.27129
Arhgef28	0.016761	8	6	12	0.27129
Cdk16	0.0167669	2	8	10	0.27129
Mark3	0.0167669	8	2	10	0.27129
Ywhab	0.0167669	2	8	10	0.27129
Nacc1	0.0167669	2	8	10	0.27129
Rtn3	0.0167669	2	8	10	0.27129
Hnrnpul2	0.0167712	10	6	10	0.27129
Cdc37	0.0168103	6	2	10	0.27129
D130084N16Rik	0.0168274	8	6	12	0.27129
Etv6	0.0168394	8	8	10	0.27129
Ago2	0.0168394	10	6	10	0.27129
Mmab	0.0168394	2	8	10	0.27129
Mark4	0.0168394	2	8	10	0.27129
Acot9	0.0168861	10	8	12	0.271814
Med7	0.016963	6	6	10	0.272735
ND5	0.0170251	10	10	12	0.272735
Acox1	0.0170939	8	8	12	0.272735
Atp8a1	0.0170939	8	8	12	0.272735
Tfpt	0.0170939	2	4	12	0.272735
Rpl35	0.0170939	4	4	12	0.272735
Tbc1d24	0.0171533	2	2	10	0.272735
Ugcg	0.0171882	10	6	12	0.272735
Arl6ip6	0.0171882	4	6	10	0.272735
Klhl24	0.0171882	8	6	12	0.272735
Pzp	0.0171905	10	6	10	0.272735
Fbxw2	0.0171905	6	4	10	0.272735
Zhx3	0.0171905	10	6	10	0.272735
Ctsc	0.0171908	2	6	12	0.272735
Rbbp8	0.0171908	2	6	12	0.272735
Tut1	0.0171908	12	6	12	0.272735
Zfp846	0.0171981	6	4	10	0.272735
Pbrm1	0.0172003	4	8	12	0.272735
Sall2	0.0172614	2	8	12	0.272798
Pdxdc1	0.0172614	8	8	12	0.272798
Taok3	0.0172614	10	8	12	0.272798
Mff	0.0172614	2	4	12	0.272798
Eif2ak4	0.0173874	4	2	12	0.274166
Galnt2	0.0174656	2	8	10	0.274166
Arf6	0.0174914	6	4	12	0.274166
Apoa1	0.0174914	12	4	12	0.274166
Recql5	0.0174914	8	8	12	0.274166
Canx	0.0174914	4	4	12	0.274166
Stag1	0.0174914	12	4	12	0.274166
Zbtb26	0.0174914	12	8	12	0.274166
Rps24	0.0174914	4	8	12	0.274166
Ick	0.0174914	12	4	12	0.274166
Dhx30	0.0176206	4	6	12	0.275763
Ntn4	0.0176366	2	4	12	0.275763
Rogdi	0.0176366	6	8	12	0.275763
Hif1an	0.0177157	2	6	12	0.276317
Flywch1	0.017734	4	4	10	0.276317
2700060E02Rik	0.017734	6	6	10	0.276317
C2	0.0178218	10	8	12	0.276317
Pnpo	0.017889	12	4	12	0.276317
Ppic	0.017889	4	8	12	0.276317
Stx8	0.017889	10	8	12	0.276317
Bcl6	0.017889	8	8	12	0.276317
Ttc9c	0.017889	4	4	12	0.276317
Nudt7	0.017889	10	8	12	0.276317
Apoa1	0.017889	12	4	12	0.276317
0	0.017889	8	8	12	0.276317
Tc2n	0.017889	12	4	12	0.276317
Mvp	0.017889	12	4	12	0.276317
Fblim1	0.017889	6	8	12	0.276317
Thap1	0.0179475	4	6	10	0.276747
Slc35a3	0.0180291	4	6	10	0.276747
LOC100862433 /// Rps16 /// Rps16-ps2	0.0180291	6	4	10	0.276747
Zdhhc6	0.0180291	4	6	10	0.276747
Ncor1	0.0180462	10	6	10	0.276747
Fam208b	0.0180467	8	10	12	0.276747
Lrr1	0.0180467	4	4	12	0.276747
Kbtbd7	0.0180476	8	10	12	0.276747
Btg3 /// Gm7334	0.018065	12	8	12	0.276747
Ddx24	0.0180832	8	6	12	0.276747
Lzic	0.0181087	2	6	12	0.276747
Ift122	0.0181119	8	10	12	0.276747
Cnpy2	0.0181195	6	6	10	0.276747
Letmd1	0.0181195	6	6	10	0.276747
Ugt1a1 /// Ugt1a10 /// Ugt1a2 /// Ugt1a5 /// Ugt1a6a /// Ugt1a6b /// Ugt1a7c /// Ugt1a9	0.0181831	8	8	12	0.277495
Cmtr2	0.0182462	2	4	12	0.277522
Slain2	0.0182482	4	4	12	0.277522
Acad9	0.0182865	2	4	12	0.277522
Snx33	0.0182865	12	4	12	0.277522
Eif2d	0.0182865	4	8	12	0.277522
Rbm25	0.0182865	8	8	12	0.277522
2810408M09Rik	0.0182865	12	4	12	0.277522
Bbs2	0.0183017	2	4	12	0.277533
Magt1	0.0183831	10	4	10	0.278545
Vegfa	0.0184773	12	8	12	0.278846
Rpl41	0.0184773	6	6	12	0.278846
Xpo4	0.0184801	12	6	12	0.278846
Meaf6	0.0184801	2	6	12	0.278846
Pex3	0.0185051	6	6	10	0.278846
Thg1l	0.0185051	6	6	10	0.278846
Zfp59	0.0185051	6	6	10	0.278846
Zfp365	0.0186372	4	4	12	0.279558
Habp4	0.0186705	10	8	12	0.279558
Tbc1d13	0.0186792	6	6	10	0.279558
C2	0.018684	12	4	12	0.279558
Slc11a2	0.018684	10	8	12	0.279558
Cenpk	0.018684	4	4	12	0.279558
Setd7	0.018684	8	8	12	0.279558
Ccs	0.018684	8	8	12	0.279558
9630010G10Rik	0.018684	8	4	12	0.279558
Ppp4r1l-ps	0.0187497	10	2	10	0.280321
Ptprm	0.0188676	10	4	10	0.281176
Dph2	0.0188906	6	6	10	0.281176
Mllt11	0.0189053	12	8	12	0.281176
Ankrd11	0.0189053	12	8	12	0.281176
Ino80	0.018907	12	6	12	0.281176
Lrpap1	0.018907	2	6	12	0.281176
Serinc1	0.0189099	12	6	12	0.281176
Rab22a	0.0189848	4	6	10	0.282071
Paip1	0.0190816	4	4	12	0.282411
Sppl2b	0.0190816	10	4	12	0.282411
Aars2	0.0190816	8	8	12	0.282411
0	0.0190816	8	8	12	0.282411
Mid2	0.0191122	2	4	10	0.282411
Nfxl1	0.0191277	4	4	12	0.282411
Nat9	0.0191408	12	8	12	0.282411
Pabpn1	0.0191408	4	4	12	0.282411
Mroh1	0.0191408	8	8	12	0.282411
Rbfox2	0.0191857	2	8	10	0.282633
Vcl	0.0192869	10	6	10	0.282633
Tacc2	0.0192869	10	6	10	0.282633
H2-K1	0.0192869	4	6	10	0.282633
Trappc11	0.0192869	10	4	10	0.282633
Zfp871	0.0192869	10	4	10	0.282633
Slc37a1	0.0193367	10	6	12	0.282633
Tmem259	0.0193367	10	6	12	0.282633
Cav2	0.0193481	4	2	12	0.282633
Sgms1	0.0193481	8	10	12	0.282633
Trak1	0.0193481	8	10	12	0.282633
Gskip	0.0193481	8	2	12	0.282633
Naprt1	0.0193481	12	2	12	0.282633
Amot	0.01945	2	6	10	0.283614
Bcl3	0.0194791	10	4	12	0.283614
Cmpk1	0.0194791	12	4	12	0.283614
Plekhh1	0.0194791	12	8	12	0.283614
F11r	0.0195191	12	2	12	0.283614
Trim7	0.0195191	10	8	12	0.283614
Vps13a	0.0195191	4	8	12	0.283614
Ermard	0.0196181	8	10	12	0.284011
Mapre1	0.0196581	2	4	12	0.284011
Reg1	0.0197062	4	6	10	0.284011
Fbxo22	0.0197062	6	4	10	0.284011
Akap9	0.0197062	10	6	10	0.284011
Mia3	0.0197062	10	6	10	0.284011
Uggt1	0.0197149	10	6	10	0.284011
Brat1	0.0197378	4	6	10	0.284011
Inpp5e	0.0197664	6	8	12	0.284011
Lats2	0.0197694	2	6	12	0.284011
Tubgcp3	0.0197694	6	6	12	0.284011
Gm10451	0.0197694	12	6	12	0.284011
Dnajb6	0.0197694	12	6	12	0.284011
Tiparp	0.0197694	10	6	12	0.284011
Lhpp	0.0197694	2	6	12	0.284011
Idua	0.0198552	2	6	10	0.284814
Cdc40	0.0198552	8	4	10	0.284814
Pmpcb	0.0199379	4	6	10	0.285483
Fbxo31	0.019966	10	8	12	0.285483
Uhmk1	0.0199745	2	4	10	0.285483
Mmp19	0.0201255	10	6	10	0.285483
Cgrrf1	0.0201255	4	6	10	0.285483
Cdc34	0.0201255	6	4	10	0.285483
Rasal2	0.0201255	10	4	10	0.285483
Tpcn1	0.0201255	6	4	10	0.285483
Bnip2	0.0201754	4	4	12	0.285483
Metap2	0.0201754	4	4	12	0.285483
Gm5806 /// Gm9855 /// Tdg	0.0201754	4	4	12	0.285483
Hspa4	0.0201961	4	6	12	0.285483
Masp1	0.0201961	6	2	12	0.285483
Vps4b	0.0201992	12	6	12	0.285483
Zfp862-ps	0.0201992	10	6	12	0.285483
0	0.0201992	6	6	12	0.285483
9030624J02Rik	0.0202137	2	4	12	0.285483
Ip6k1	0.0202342	10	8	12	0.285483
Sugt1	0.0202342	6	6	10	0.285483
2010106E10Rik	0.020248	8	10	12	0.285483
Uxs1	0.020248	2	10	12	0.285483
Cyhr1	0.020248	6	10	12	0.285483
Tusc1	0.020248	2	2	12	0.285483
0	0.0202604	2	6	10	0.285483
Ccl25	0.0204304	12	4	12	0.286323
Ctu1	0.0204304	12	6	12	0.286323
0	0.0204304	10	6	12	0.286323
LOC100861749 /// Sfi1	0.0204304	8	10	12	0.286323
Leo1	0.0204304	4	6	12	0.286323
Lipa	0.0204939	2	8	10	0.286323
Gm4120 /// Gm4983 /// Gm9292 /// LOC101055823	0.0204939	8	2	10	0.286323
Gtf2a2 /// LOC102642697	0.0205208	4	4	12	0.286323
Pex3	0.0205219	8	4	10	0.286323
Ube2m	0.0205447	4	6	10	0.286323
Sumf1	0.0205447	4	6	10	0.286323
Cars2	0.0205447	6	4	10	0.286323
Rapgef6	0.0205447	10	4	10	0.286323
Srbd1	0.0205447	10	4	10	0.286323
Bche	0.0205447	10	4	10	0.286323
0	0.0205857	10	8	12	0.286453
Cd36	0.020599	10	8	12	0.286453
Far1	0.020599	2	4	12	0.286453
Naif1	0.020629	12	6	12	0.286598
Rhbdd3	0.0206395	2	8	10	0.286598
Brcc3	0.020698	4	2	12	0.286993
Phf6	0.020698	4	2	12	0.286993
Tmem161a	0.0208297	12	8	12	0.287965
Vcp	0.0208652	2	2	10	0.287965
Slc27a1	0.0208947	8	6	12	0.287965
Zswim3	0.0209023	10	2	10	0.287965
Eif4e2	0.0209023	10	2	10	0.287965
Pcif1	0.0209023	8	6	10	0.287965
Glis2	0.0209299	2	8	10	0.287965
Abcb8	0.020964	4	6	10	0.287965
Fzd1	0.020964	4	6	10	0.287965
Abhd13	0.020964	4	6	10	0.287965
Gle1	0.020964	6	4	10	0.287965
Mkrn1	0.020964	4	6	10	0.287965
Pkdcc	0.020964	4	6	10	0.287965
Rpl7l1	0.0210338	4	4	12	0.288238
Spink4	0.0210587	10	6	12	0.288238
D3Ertd751e	0.0210587	6	6	12	0.288238
Atp10a	0.0210587	12	6	12	0.288238
Mlst8	0.0210895	12	4	12	0.288238
Pik3c2g	0.0210895	8	8	12	0.288238
Map2k2	0.0210895	2	8	12	0.288238
Zbed6	0.0211479	4	2	12	0.28883
Slc7a1	0.02121	2	4	12	0.289265
Setd5	0.02121	2	4	12	0.289265
Kitl	0.0212561	12	8	12	0.28948
Atf7	0.0212561	2	6	10	0.28948
Adm	0.0213279	10	6	10	0.290252
Snrpb2	0.0214001	6	6	10	0.291026
Myo1b	0.0214503	10	4	10	0.291308
Tmem87b	0.0214513	12	4	12	0.291308
Naa30	0.02158	2	4	12	0.292847
Cdk2ap1	0.021627	6	6	10	0.293069
Rai1	0.021627	2	4	10	0.293069
Ralgps2	0.0216656	2	6	12	0.293153
Isoc1	0.0217274	8	8	12	0.293153
Rad1	0.0217274	2	4	12	0.293153
Cwf19l2	0.0217274	10	8	12	0.293153
Cbfa2t2	0.0217274	2	4	12	0.293153
Siae	0.0217274	8	8	12	0.293153
0	0.0217622	6	4	10	0.293153
Lats1	0.0217925	8	6	10	0.293153
Sbf1	0.021802	2	8	10	0.293153
Dpp8	0.021802	2	8	10	0.293153
Ccni	0.021802	2	8	10	0.293153
BC016579	0.0218234	12	6	12	0.293234
Nfib	0.0218768	10	4	10	0.293746
Sertad4	0.0219488	2	6	12	0.294483
Tle2	0.0220003	6	4	10	0.294483
Traf3	0.0220003	4	6	10	0.294483
2500002B13Rik	0.0220478	4	2	12	0.294483
Tmem127	0.0220517	4	6	10	0.294483
Rps24	0.0220598	4	4	12	0.294483
Ankle2	0.0220598	2	4	12	0.294483
Ccdc28a	0.0220704	12	4	12	0.294483
Tmem181a	0.0220704	4	8	12	0.294483
Igf2bp2	0.02213	2	4	10	0.294866
Slc4a4	0.02213	2	4	10	0.294866
Il4ra	0.022171	2	6	10	0.295206
Tmem126a	0.0222318	2	6	12	0.295268
Gm10094 /// Sap18	0.0222447	2	4	12	0.295268
Add2	0.0222562	6	6	10	0.295268
Nelfcd	0.0222587	4	2	12	0.295268
Qtrt1	0.0222644	10	10	12	0.295268
Orai2	0.0222683	4	6	10	0.295268
Tfeb	0.0224975	10	6	12	0.297485
Prkab2	0.0224975	10	6	12	0.297485
Ttc3	0.0224975	6	10	12	0.297485
Zfp568	0.0224978	8	10	12	0.297485
Ptprk	0.0225503	10	6	10	0.297527
Inpp4a	0.0225609	12	4	12	0.297527
Mrpl47	0.0225609	10	8	12	0.297527
Foxa3	0.0225729	12	4	12	0.297527
B930041F14Rik	0.0226329	6	6	10	0.297527
Slc39a6	0.0226733	12	8	12	0.297527
Gstz1	0.0226733	2	6	12	0.297527
Macf1	0.0227199	2	2	10	0.297527
Ticam1	0.0227561	2	8	10	0.297527
Pdcd6	0.022762	10	8	12	0.297527
Fkbp3	0.022762	4	4	12	0.297527
Rps27l	0.022762	4	8	12	0.297527
Irak1	0.022762	4	8	12	0.297527
Zbtb46	0.022762	12	8	12	0.297527
Kpna1	0.022762	12	8	12	0.297527
Man2b1	0.0228018	8	6	12	0.297527
Mrpl11	0.0228018	6	6	12	0.297527
Ehd1	0.0228151	4	2	12	0.297527
Papss2	0.0228151	8	10	12	0.297527
D430020J02Rik	0.022828	6	4	10	0.297527
Metap1d	0.022828	6	6	10	0.297527
Txnrd1	0.0230457	6	2	10	0.298923
Osbpl9	0.0230462	4	10	12	0.298923
Ythdf3	0.0230462	8	10	12	0.298923
Efnb1	0.0230462	2	2	12	0.298923
Cnnm3	0.0230513	10	8	12	0.298923
Pah	0.0230513	12	4	12	0.298923
Fam171a1	0.0230859	2	4	12	0.298923
Arpp19	0.0231003	6	4	10	0.298923
Tsn	0.0231003	10	4	10	0.298923
Sestd1	0.0231003	10	6	10	0.298923
Srsf3	0.0231359	6	6	10	0.298923
Smek2	0.0231359	8	6	10	0.298923
Ywhaz	0.0232793	12	8	12	0.298923
Fabp1	0.0232793	12	4	12	0.298923
Cnot6	0.0232793	8	4	12	0.298923
Hsf2bp	0.0232793	6	8	12	0.298923
8430408G22Rik	0.0232793	8	8	12	0.298923
Zfp277	0.0232793	4	4	12	0.298923
Nudt8	0.0232793	12	8	12	0.298923
Micu1	0.0232793	12	4	12	0.298923
Zkscan8	0.0232793	2	4	12	0.298923
Fundc2	0.0232793	2	4	12	0.298923
Yme1l1	0.023317	10	8	12	0.299207
Atxn7l3b	0.0233551	8	6	10	0.299494
Ept1	0.0233718	12	6	12	0.299508
Fam45a	0.0234362	4	4	12	0.300058
Rhobtb3	0.0235418	4	4	12	0.300058
Rpl11	0.0235429	6	2	12	0.300058
Cnp	0.0235467	4	6	10	0.300058
Pex16	0.0235949	12	6	12	0.300058
Ppapdc2	0.0235949	4	2	12	0.300058
Eny2	0.0235949	10	10	12	0.300058
Spata7	0.0235949	12	6	12	0.300058
Tead2	0.0235949	6	6	12	0.300058
Picalm	0.0235949	10	6	12	0.300058
Ubc	0.0236136	10	6	10	0.300058
Myo1e	0.0236388	2	4	10	0.300058
Cklf	0.0236388	6	6	10	0.300058
Peak1	0.0236388	2	4	10	0.300058
Ing5	0.0236503	4	6	10	0.300058
Mrpl36	0.0237966	4	4	12	0.300915
Sulf2	0.0237966	4	4	12	0.300915
6330522J23Rik	0.0237966	6	4	12	0.300915
2610005L07Rik	0.0237966	8	8	12	0.300915
Dcaf5	0.0237966	12	4	12	0.300915
Pdss2	0.0239281	4	2	12	0.301239
Plekhh3	0.0239281	10	10	12	0.301239
Noc3l	0.0240322	12	4	12	0.301239
Rcor1	0.0240367	2	2	10	0.301239
Lancl2	0.0240623	2	4	12	0.301239
C1galt1	0.0240623	2	8	10	0.301239
Rnf14	0.0241136	12	8	12	0.301239
Tspan9	0.0241136	10	8	12	0.301239
Cd2bp2	0.0241418	6	6	10	0.301239
Slco2a1	0.0241418	2	4	10	0.301239
Creb3l1	0.0241437	2	2	12	0.301239
Tomm70a	0.0241437	4	8	12	0.301239
Zfp622	0.0241437	10	6	12	0.301239
Xiap	0.0241437	4	2	12	0.301239
Trim16	0.0241437	12	6	12	0.301239
Cebpb	0.0242003	6	4	10	0.301239
Shroom2	0.0242003	10	4	10	0.301239
Rrbp1	0.0242003	10	6	10	0.301239
Carf	0.0242003	6	4	10	0.301239
Cln8	0.0242053	8	4	10	0.301239
Nos2	0.024314	8	8	12	0.301239
Sub1	0.024314	12	4	12	0.301239
Rbl1	0.024314	4	8	12	0.301239
Wdfy1	0.024314	10	8	12	0.301239
Hbp1	0.024314	12	4	12	0.301239
Ccdc102a	0.024314	4	4	12	0.301239
43358	0.024314	4	4	12	0.301239
Lnp	0.024314	4	4	12	0.301239
Kiz	0.024314	10	8	12	0.301239
Lca5	0.0244845	8	2	12	0.301239
Nr6a1	0.0245119	12	6	12	0.301239
Afmid	0.0245119	4	6	12	0.301239
Gtpbp2	0.0245119	8	6	12	0.301239
Rnf13	0.024608	12	4	12	0.301239
Zfand3	0.0246092	12	4	12	0.301239
Slc41a3	0.0246447	6	6	10	0.301239
Klhdc2	0.0246447	6	6	10	0.301239
Drg1	0.0246447	6	6	10	0.301239
Srsf11	0.0246447	6	6	10	0.301239
Aspa	0.0246887	10	6	12	0.301239
Mogs	0.0246924	12	6	12	0.301239
Tle4	0.0246924	4	4	12	0.301239
Mxi1	0.0246924	8	6	12	0.301239
Dock5	0.0246924	12	6	12	0.301239
Tmtc2	0.0246924	12	6	12	0.301239
Nme1	0.0246924	4	6	12	0.301239
Bclaf1	0.0246924	2	6	12	0.301239
Cds2	0.0246924	12	6	12	0.301239
0	0.0246924	10	6	12	0.301239
Kpna1	0.0246924	2	6	12	0.301239
Cep57	0.0246924	4	4	12	0.301239
Col4a5	0.0247315	2	6	10	0.301239
C87436	0.0247315	8	4	10	0.301239
P4ha1	0.0247315	2	6	10	0.301239
43345	0.0247504	4	6	10	0.301239
Slc18b1	0.0247504	6	4	10	0.301239
Tbc1d22b	0.0247988	4	6	10	0.301239
Angptl4	0.0248081	12	6	12	0.301239
Tbc1d23	0.0248081	8	10	12	0.301239
Nsun6	0.0248081	12	6	12	0.301239
Ascc3	0.0248081	12	6	12	0.301239
Eif2s1	0.0248313	4	4	12	0.301239
Dock6	0.0248313	8	4	12	0.301239
Senp7	0.0248313	2	8	12	0.301239
Dnmt3a	0.0250381	2	2	10	0.303398
Zxdc	0.025041	10	10	12	0.303398
Cpsf1	0.025082	8	6	12	0.303509
Chtop	0.025082	2	6	12	0.303509
Prpf4b	0.025138	10	8	12	0.30392
Ufsp2	0.0251477	6	6	10	0.30392
Bptf	0.0252151	10	6	10	0.30404
Ash1l	0.0253004	10	4	10	0.30404
Usp34	0.0253004	10	6	10	0.30404
Asxl1	0.0253004	10	6	10	0.30404
Mrps5	0.0253004	6	4	10	0.30404
Lpp	0.0253004	10	6	10	0.30404
Phf2	0.0253049	6	4	10	0.30404
Mtfmt	0.0253049	2	6	10	0.30404
Lmf1	0.0253486	12	4	12	0.30404
Dennd3	0.0253486	6	8	12	0.30404
Lepre1	0.0253486	12	8	12	0.30404
Exog	0.0253486	12	8	12	0.30404
Bcat2	0.0254173	12	4	12	0.304673
Ube2k	0.0255809	4	4	12	0.306024
Ogfod2	0.0255975	10	2	12	0.306024
Lbp	0.0255975	6	10	12	0.306024
Adk	0.0257826	6	2	10	0.306024
2310075K07Rik	0.0257826	2	8	12	0.306024
Ap1g1	0.0257898	12	6	12	0.306024
Mast2	0.0258504	10	4	10	0.306024
Sp1	0.0258504	10	6	10	0.306024
Pou2f1	0.0258504	10	6	10	0.306024
Tgfb1	0.0258504	4	6	10	0.306024
Ncor1	0.0258504	10	6	10	0.306024
Trip12	0.0258504	10	6	10	0.306024
Rsl24d1	0.0258504	6	4	10	0.306024
Stt3b	0.0258504	10	6	10	0.306024
Ubr3	0.0258504	10	6	10	0.306024
Prrc2c	0.0258504	10	6	10	0.306024
Urm1	0.0258504	6	4	10	0.306024
Srrm2	0.0258504	10	6	10	0.306024
Nfib	0.0258504	10	4	10	0.306024
Tpr	0.0258504	10	6	10	0.306024
Lrrc40	0.0260689	6	6	10	0.307768
Ap1g1	0.0260689	2	4	10	0.307768
Spryd3	0.0260862	12	4	12	0.307768
Ube2d3	0.0260962	12	8	12	0.307768
St7	0.0261539	4	2	12	0.307768
Gm8539 /// Zbtb8os	0.0262048	4	6	10	0.307768
Mtf2	0.0262221	2	6	12	0.307768
Tcf20	0.0262221	2	6	12	0.307768
Mkrn1	0.0262221	2	6	12	0.307768
Ddhd2	0.0262221	10	6	12	0.307768
Uba6	0.0262304	2	4	10	0.307768
Gpn3	0.0262881	6	4	10	0.307768
Vamp3	0.0263152	2	4	12	0.307768
Ptk2	0.0263385	12	6	12	0.307768
Yap1	0.0263385	8	10	12	0.307768
Rps19	0.0263385	6	2	12	0.307768
0	0.0263385	6	6	12	0.307768
Drg1	0.0263657	12	6	12	0.307768
Asph	0.0264004	10	6	10	0.307768
Agap3	0.0264004	6	4	10	0.307768
Hnrnpab	0.0264004	6	4	10	0.307768
1700019G17Rik	0.0264004	4	6	10	0.307768
Flot1	0.0264004	6	4	10	0.307768
Zfc3h1	0.0264004	10	4	10	0.307768
Ankrd13b	0.0264004	6	4	10	0.307768
Rab5b	0.0265488	2	8	10	0.309309
Iqgap2	0.0265927	10	6	10	0.309633
Arfgap3	0.0267104	8	10	12	0.310554
Gm2701 /// LOC102631912	0.0267104	4	2	12	0.310554
Prkca	0.0267206	2	4	10	0.310554
Ogfod1	0.0267921	12	6	12	0.310593
Flnc	0.0267921	8	6	12	0.310593
Dcun1d4	0.0267921	12	6	12	0.310593
Cdk6	0.0267921	12	6	12	0.310593
Gramd1c	0.0268265	6	4	10	0.310593
Mrps25	0.0269504	6	4	10	0.310593
Wbp4	0.0269504	6	4	10	0.310593
Taok1	0.0269504	10	6	10	0.310593
Actr1b	0.0269504	4	6	10	0.310593
Ccl27a /// Ccl27b /// Gm13306 /// Gm2506 /// LOC100861978	0.0269504	6	4	10	0.310593
C030046G05	0.0269504	10	6	10	0.310593
Gid8	0.0269504	4	6	10	0.310593
Atxn2	0.0269504	10	4	10	0.310593
Ubp1	0.0269516	10	8	12	0.310593
Stat3	0.0270718	2	4	10	0.311256
Scaf11	0.0270718	8	8	12	0.311256
Entpd5	0.0270906	2	8	10	0.311256
Cyhr1	0.0270906	2	8	10	0.311256
Ppp2cb	0.0270906	2	8	10	0.311256
Xrcc4	0.0272669	10	10	12	0.312829
Eef1a2	0.0273574	6	6	12	0.312829
Ptrh1	0.0273574	4	4	12	0.312829
Ndufaf7	0.0273622	4	6	12	0.312829
Atpaf1	0.0273723	6	6	10	0.312829
Smtnl2	0.0273983	10	8	10	0.312829
Kif13b	0.0274092	8	10	12	0.312829
Tmem55b	0.0274226	4	6	10	0.312829
Pcdhb9	0.0274239	2	4	12	0.312829
Tgoln1 /// Tgoln2	0.0274239	8	8	12	0.312829
Fam114a2	0.0274239	8	8	12	0.312829
Tceb1	0.0274239	4	4	12	0.312829
Fam134a	0.0274792	2	8	10	0.312954
Tgfbrap1	0.0275004	4	6	10	0.312954
Cdc14b	0.0275004	10	4	10	0.312954
Bcl7c	0.0275004	6	4	10	0.312954
Peak1	0.0276452	2	4	10	0.314415
Snrpa1	0.0278233	4	2	12	0.316252
Tpd52	0.0278596	12	6	12	0.316305
1810013L24Rik	0.0279322	2	6	12	0.316305
Aars /// Exosc6	0.0279462	6	4	10	0.316305
Pon3	0.0279843	4	2	12	0.316305
Akt2	0.0280013	10	10	12	0.316305
Mynn	0.0280057	10	8	12	0.316305
Clcn3	0.0280188	10	4	10	0.316305
Zmynd8	0.0280188	10	6	10	0.316305
Fam46b	0.0280188	6	2	10	0.316305
Lmtk2	0.0280241	2	4	10	0.316305
Jrk	0.0280765	10	8	12	0.316305
Ndufa12	0.0280765	4	8	12	0.316305
Gtf3c4	0.0280928	12	8	12	0.316305
Nt5c3b	0.0280928	4	4	12	0.316305
Mpp1	0.0280928	12	4	12	0.316305
Psip1	0.0280928	4	4	12	0.316305
Scd1	0.0282175	8	10	12	0.317522
Coro7	0.0285022	8	6	12	0.319877
Wwp1	0.0285022	12	6	12	0.319877
Ranbp10	0.0285561	8	6	10	0.319877
Txndc15	0.0285561	4	6	10	0.319877
Kdelc1	0.0285561	6	6	10	0.319877
Rhbdd2	0.0286149	4	4	10	0.319877
Mbd2	0.0286422	2	4	12	0.319877
Pik3r2	0.0286627	4	6	10	0.319877
Rasef	0.0286627	4	6	10	0.319877
Ctbs	0.0286758	6	6	10	0.319877
Agl	0.0286758	2	4	10	0.319877
Itgav	0.0286758	2	4	10	0.319877
Pcnxl4	0.0286758	6	6	10	0.319877
Kctd9	0.0287617	2	4	12	0.319877
Maea	0.0287617	10	8	12	0.319877
Ppp2r5c	0.0287617	4	8	12	0.319877
Gm12693 /// Rwdd1	0.0287617	4	4	12	0.319877
H2afz	0.0287617	4	4	12	0.319877
Polh	0.0287617	4	4	12	0.319877
Trpt1	0.0287617	2	4	12	0.319877
Fnbp1l	0.0290455	10	6	10	0.322622
2010004M13Rik	0.0290455	12	4	12	0.322622
Bmpr1a	0.0291812	2	6	12	0.322622
Mrpl19	0.0291812	2	4	12	0.322622
Tmem41a	0.0292526	12	6	12	0.322622
Rnf121	0.0292526	10	10	12	0.322622
Prpsap1	0.0292526	4	6	12	0.322622
Tgs1	0.0292693	8	6	12	0.322622
6720427I07Rik /// 6720427I07Rik	0.0292693	10	6	12	0.322622
Arl16	0.0292693	2	6	12	0.322622
Wipf2	0.0292787	2	4	12	0.322622
Flnb	0.0293275	2	4	10	0.322622
Fbxw4	0.0293752	10	8	12	0.322622
Atg5	0.0293793	6	4	10	0.322622
Cox15	0.0293793	6	4	10	0.322622
Clrn3	0.0293793	4	6	10	0.322622
Arap2	0.0294022	10	8	12	0.322622
Tmem45a	0.0294306	12	4	12	0.322622
Ccdc136	0.0294306	4	8	12	0.322622
Pcmtd1	0.0294306	2	4	12	0.322622
Ppp2r2a	0.0294306	12	8	12	0.322622
Ppp3r1	0.0294306	12	4	12	0.322622
Zfp36	0.0294306	12	4	12	0.322622
Clcn7	0.0294306	6	8	12	0.322622
Apoa1	0.0294306	12	4	12	0.322622
Rheb	0.0294649	10	10	12	0.322813
Ier5	0.0294898	2	8	10	0.322901
Synrg	0.0296635	10	6	10	0.324369
Abca3	0.029701	10	6	10	0.324369
Riok1	0.0297616	12	8	12	0.324369
Vrk2	0.0298072	6	2	10	0.324369
Pla2g6	0.0299152	10	10	12	0.324369
Slc19a1	0.0299152	10	8	12	0.324369
Fosb	0.0299491	2	2	12	0.324369
Tom1	0.0299491	10	6	12	0.324369
Smim20	0.0299491	10	6	12	0.324369
Mr1	0.0299792	4	4	10	0.324369
Il6st	0.0299792	2	4	10	0.324369
Iqgap2	0.0299792	2	4	10	0.324369
Chd9	0.0300021	10	6	10	0.324369
Ipp	0.0300198	12	6	12	0.324369
Mtfr1	0.0300198	2	6	12	0.324369
Mthfd2l	0.0300198	4	6	12	0.324369
Ykt6	0.0300198	12	6	12	0.324369
Tec	0.0300319	10	6	12	0.324369
Slc35a5	0.0300959	4	6	10	0.324369
Bop1	0.0300959	6	4	10	0.324369
Rbfox2	0.0300959	6	4	10	0.324369
Rnd3	0.0300994	12	4	12	0.324369
Zmym1	0.0300994	12	8	12	0.324369
Rdh7	0.0300994	12	4	12	0.324369
Gne	0.0300994	12	4	12	0.324369
Dck	0.0300994	4	4	12	0.324369
Ccny	0.0300994	12	8	12	0.324369
A330021E22Rik	0.0301014	12	8	12	0.324369
Tbc1d1	0.0301502	4	10	12	0.324369
Eif2a	0.0301502	4	2	12	0.324369
Dtx3l	0.0301502	10	2	12	0.324369
Utrn	0.0302311	8	8	12	0.325057
Eml4	0.03026	2	4	10	0.325184
Xpo7	0.0305572	2	6	10	0.327682
Kmt2a	0.0306309	2	4	10	0.327682
Caprin1	0.0306309	6	6	10	0.327682
Flcn	0.0306309	6	6	10	0.327682
Ftsj1	0.0306456	4	2	12	0.327682
Mmab	0.0306456	8	6	12	0.327682
Zbtb20	0.0307532	2	2	10	0.327682
Fzd2	0.0307683	4	4	12	0.327682
Nub1	0.0307683	12	4	12	0.327682
Syt14	0.0307683	8	8	12	0.327682
Tpd52	0.0307703	12	6	12	0.327682
Mecp2	0.0307703	8	6	12	0.327682
Cd2bp2	0.0308124	4	6	10	0.327682
Ldlrad4	0.0308124	4	6	10	0.327682
Alcam	0.0308124	10	6	10	0.327682
Helz	0.0308124	10	6	10	0.327682
Gsr	0.0308303	2	8	10	0.327682
Dnajc14	0.0308303	2	8	10	0.327682
Papss2	0.0308354	8	10	12	0.327682
Zdhhc5	0.0308354	2	2	12	0.327682
Isg20	0.0308995	10	6	10	0.327998
Plscr3	0.0308995	4	6	10	0.327998
Stxbp6	0.0309869	10	8	12	0.328743
Cisd2	0.0312247	6	4	10	0.329734
Ppm1d	0.0312247	6	2	10	0.329734
Tlr3	0.0312363	2	6	10	0.329734
Fryl	0.0312827	2	4	10	0.329734
Nbeal2	0.0312827	2	4	10	0.329734
Car13	0.0313421	4	2	12	0.329734
Tmem205	0.0313421	10	6	12	0.329734
Rnmt	0.0313421	12	6	12	0.329734
Anp32e	0.0313421	4	6	12	0.329734
Malat1	0.0313939	4	8	10	0.329734
Mpg	0.0314372	2	8	12	0.329734
Fbxw2	0.0314372	4	4	12	0.329734
Zfp597	0.0314372	12	8	12	0.329734
Ehd4	0.0314372	4	4	12	0.329734
Umps	0.0314372	4	4	12	0.329734
Lonp2	0.0314372	8	8	12	0.329734
Mgat3	0.0315005	2	8	10	0.329734
Casp9	0.0315005	2	8	10	0.329734
Kdm5c	0.0315005	2	8	10	0.329734
Rps10	0.0315206	6	2	12	0.329734
Slc35c2	0.0315206	12	2	12	0.329734
Tyw3	0.0315208	2	6	12	0.329734
Plscr4	0.031529	4	6	10	0.329734
Rps9	0.031529	6	4	10	0.329734
Ubn2	0.031529	10	4	10	0.329734
Zfp451	0.031529	10	4	10	0.329734
Vamp4	0.0319153	8	4	10	0.331866
Galnt1	0.0319153	8	4	10	0.331866
Srsf3	0.0319344	6	6	10	0.331866
Foxo1	0.0319756	10	6	10	0.331866
Pcbp4	0.0319756	4	6	10	0.331866
Zwint	0.0319919	4	8	12	0.331866
Lphn3	0.0320346	8	8	10	0.331866
Opn3	0.0320385	2	6	12	0.331866
C4bp	0.0320385	12	4	12	0.331866
Pcgf6	0.0320385	12	6	12	0.331866
Soga3	0.0320385	10	10	12	0.331866
Fem1c	0.0320385	2	6	12	0.331866
Cyp2d26	0.0320385	12	6	12	0.331866
Nwd1	0.0320385	6	6	12	0.331866
Whsc1l1	0.0320385	12	6	12	0.331866
Ccdc50	0.0321061	4	4	12	0.331866
Ttc14	0.0321061	2	4	12	0.331866
Tst	0.0321061	12	4	12	0.331866
Rbpj	0.0321061	12	4	12	0.331866
Cacna2d1	0.0321515	4	4	12	0.331866
Kirrel	0.0321707	2	8	10	0.331866
Mapre2	0.0321707	2	8	10	0.331866
Itsn2	0.0322058	4	2	12	0.331866
Rcan1	0.0322456	6	4	10	0.331866
Unc13b	0.0322456	10	6	10	0.331866
Bcl2l2	0.0322456	4	6	10	0.331866
Cald1	0.0322456	6	4	10	0.331866
Mcm10	0.0322712	4	6	12	0.331866
Stau2	0.0322712	2	6	12	0.331866
Abl2	0.0322712	12	6	12	0.331866
Ddx39	0.0322712	4	6	12	0.331866
Zfp800	0.0323424	12	8	12	0.332419
Hdac4	0.0325723	10	4	10	0.333846
Fam21	0.0325861	2	4	10	0.333846
Zbtb39	0.0325861	2	4	10	0.333846
Swt1	0.0325861	8	6	10	0.333846
Prox1	0.0325861	2	4	10	0.333846
Rps19 /// Rps19-ps3	0.0325861	4	4	10	0.333846
Thtpa	0.0327295	4	6	10	0.334654
Stxbp4	0.0327295	10	8	10	0.334654
Cox5a	0.032735	4	6	12	0.334654
Arhgap6	0.032735	2	4	12	0.334654
Dnm2	0.0327749	8	8	12	0.334704
Fam83h	0.0327749	8	8	12	0.334704
Plbd2	0.0328409	2	8	10	0.335199
Fem1b	0.0328822	2	4	12	0.335253
Rfng	0.0328911	8	10	12	0.335253
Mpp7	0.0329621	10	6	10	0.335253
Haus2	0.0329621	6	4	10	0.335253
Ssx2ip	0.0330171	2	8	10	0.335253
Ccdc186	0.0330217	12	6	12	0.335253
Stk11ip	0.0330217	12	6	12	0.335253
Zfp763	0.0330217	12	6	12	0.335253
Phf12	0.0330217	2	6	12	0.335253
Arf2	0.0330217	12	6	12	0.335253
Scnm1	0.0330701	6	6	10	0.335566
A730098P11Rik /// Gm6747 /// Morf4l1	0.0332542	12	4	12	0.336913
Psmf1	0.0332734	8	4	10	0.336913
Zfp217	0.0332734	2	6	10	0.336913
Parp8	0.0332734	8	4	10	0.336913
Src	0.0333468	6	4	10	0.337478
Acsf2	0.0334315	6	10	12	0.33759
Gm15772 /// Rpl26	0.0334315	6	6	12	0.33759
Trim65	0.0334438	2	4	12	0.33759
Arhgef1	0.0335112	2	8	10	0.33759
Igfbp4	0.0335112	2	8	10	0.33759
Gpam	0.0335112	2	8	10	0.33759
Hsp90aa1	0.0335112	10	8	10	0.33759
Hyi	0.033517	2	4	12	0.33759
Crebzf	0.033517	10	8	12	0.33759
Mettl3	0.0335573	6	6	10	0.337809
Higd1a	0.0335763	8	10	12	0.337809
Zfp3	0.0335917	4	6	10	0.337809
Pcgf2	0.0336787	4	6	10	0.33815
Dnajc13	0.0336787	10	4	10	0.33815
Ankrd17	0.0336787	10	4	10	0.33815
Azin1	0.0337722	2	6	12	0.338748
Ppp1r3b	0.0337737	2	4	10	0.338748
1700071K01Rik /// Phb	0.033817	6	6	10	0.339004
Lcp1	0.0339525	8	4	10	0.340183
Fam136a	0.03401	12	8	12	0.340581
Raph1	0.0340415	10	6	10	0.340719
Pbx1	0.0340933	2	6	10	0.340892
Srd5a3	0.0341585	2	6	12	0.340892
Rpl14	0.0342615	4	2	12	0.340892
Itgb1bp1	0.0342615	4	2	12	0.340892
Plekhm3	0.034271	10	6	10	0.340892
4833439L19Rik	0.0342754	12	6	12	0.340892
Bloc1s6	0.0343764	12	4	12	0.340892
Gatsl3	0.0343764	6	4	12	0.340892
Drg2	0.0343953	6	4	10	0.340892
Gm21540 /// Tmed2	0.0343953	6	4	10	0.340892
Stard3nl	0.0343953	4	6	10	0.340892
Map4k4	0.0343953	10	4	10	0.340892
Hectd1	0.0343953	10	6	10	0.340892
Akap13	0.0343953	10	6	10	0.340892
0	0.0343953	10	6	10	0.340892
Git1	0.0343953	4	6	10	0.340892
Psd3	0.0343963	2	4	10	0.340892
Cdk7	0.034453	8	4	10	0.340892
Parp10 /// Plec	0.034453	4	6	10	0.340892
Ldlrap1	0.0345227	12	6	12	0.340892
C2cd5	0.0345227	2	6	12	0.340892
Stx18	0.0345227	2	6	12	0.340892
Nudcd1	0.0345227	2	6	12	0.340892
Zfp574	0.0345227	12	6	12	0.340892
Tmx1	0.0345227	4	6	12	0.340892
Ces2b	0.0345227	12	6	12	0.340892
Ino80c	0.034668	8	2	10	0.342149
Alg14	0.0347161	10	10	12	0.342448
Ids	0.0348099	2	8	10	0.343162
Mapk8	0.0348245	12	2	12	0.343162
Ctnnal1	0.0350326	10	6	10	0.343321
Eftud2	0.0351118	10	4	10	0.343321
Actl6a	0.0351118	6	4	10	0.343321
Emd	0.0351118	10	4	10	0.343321
Acsf3	0.0351118	4	6	10	0.343321
Uba6	0.0351118	10	6	10	0.343321
4930402H24Rik	0.0351118	10	6	10	0.343321
Ppap2b	0.0351118	10	6	10	0.343321
Pi4k2b	0.0351118	6	4	10	0.343321
Rala	0.0351118	4	6	10	0.343321
Nfia	0.0351542	10	4	10	0.343321
Cyp2j6	0.0352279	12	6	12	0.343321
Pop5	0.0352352	6	6	10	0.343321
1700052N19Rik	0.0352358	4	4	12	0.343321
Ppp3cb	0.0352358	4	8	12	0.343321
AW987390	0.0352358	8	8	12	0.343321
Xylt2	0.0352358	12	8	12	0.343321
Terf2	0.0352731	10	6	10	0.343321
Psme1	0.0352732	10	6	12	0.343321
Gm7120	0.0352732	2	6	12	0.343321
Cask	0.0352732	2	6	12	0.343321
Dzip3	0.0352732	2	6	12	0.343321
Nfkbia	0.0352732	10	6	12	0.343321
Lyrm9	0.0352898	10	10	12	0.343321
Ehd2	0.0352898	4	10	12	0.343321
Atp6v0b	0.0353143	6	4	10	0.343385
Rarg	0.0354934	2	8	10	0.344698
Atg13	0.0354934	2	8	10	0.344698
Lyrm5	0.0355215	2	4	12	0.344698
Mrpl24	0.0355215	12	8	12	0.344698
Khdrbs1	0.0357081	8	4	10	0.345395
Lpp	0.0357501	10	4	10	0.345395
Zc3h13	0.0357942	10	6	10	0.345395
Abcf1	0.0358284	10	4	10	0.345395
Agpat1	0.0358284	4	6	10	0.345395
Zfp120	0.0358284	4	6	10	0.345395
Tusc3	0.0358284	4	6	10	0.345395
Rnf10	0.0358284	6	4	10	0.345395
Crb3	0.0358284	4	6	10	0.345395
Mboat2	0.0358284	10	6	10	0.345395
Sdccag8	0.0358284	4	6	10	0.345395
Pofut2	0.0358284	6	4	10	0.345395
Cyhr1	0.0358284	6	4	10	0.345395
Sppl2a	0.035895	4	6	10	0.345688
Ago2	0.035895	10	4	10	0.345688
Morn4	0.0360237	12	6	12	0.34622
Ppm1k	0.0360237	12	6	12	0.34622
Reep3	0.0360331	4	6	12	0.34622
Mtss1	0.0360331	10	6	10	0.34622
Strap	0.0360935	12	4	12	0.34622
Nr3c1	0.0360952	8	8	12	0.34622
Shmt1	0.0360952	6	8	12	0.34622
Tpm3	0.0360952	12	8	12	0.34622
Klhdc8a	0.0361301	4	2	12	0.346352
Ugcg	0.0361452	4	6	10	0.346352
Met	0.0361757	10	6	10	0.34647
0	0.0362124	10	6	12	0.346648
Wdr59	0.0362773	8	6	12	0.347096
Grina	0.0363188	2	8	10	0.347319
1810014B01Rik	0.0364765	2	6	12	0.348653
[truncated: 17,108 more rows]

## Sheet: gene list shared with Eigenvalu
Shared between eigenvalue and RAIN (FDR<0.22) (79.6% shared with eigenvalue-identified 12h transcriptome)	Shared between eigenvalue and RAIN (FDR<0.3) (74.8% shared with eigenvalue-identified 12h transcriptome)
1700037H04Rik	1110012L19Rik
1700047I17Rik2	1700037H04Rik
1700052N19Rik	1700047I17Rik2
1810014B01Rik	1700052N19Rik
2010107G23Rik	1810014B01Rik
2510002D24Rik	2010107G23Rik
2610034B18Rik	2310001H17Rik
2810001A02Rik	2310047K21Rik
2810047C21Rik1	2510002D24Rik
2900097C17Rik	2610005L07Rik
43531	2610034B18Rik
4931414P19Rik	2700060E02Rik
4933411K20Rik	2810001A02Rik
5430414B19Rik	2810047C21Rik1
A430033K04Rik	2810474O19Rik
Abhd12	2900097C17Rik
Acaca	3110009F21Rik
Acat1	43165
Adi1	43166
Aimp1	4930453N24Rik
Akap13	4931414P19Rik
Aldh5a1	4933411K20Rik
Als2cl	5430414B19Rik
Anapc11	6330522J23Rik
Angel2	9030624J02Rik
Ank1	9630010G10Rik
Ankzf1	A430033K04Rik
Ap1s3	AI661453
Ap2a2	AK077428
Aplp2	Abcb8
Aqr	Abhd12
Ar	Abhd13
Arap1	Abhd5
Arf2	Acaca
Arf3	Acad9
Arfgef2	Acat1
Arhgap6	Acin1
Arhgef11	Acot9
Arhgef17	Acox1
Arhgef25	Adam15
Arid5b	Add2
Armc8	Adhfe1
Atg4b	Adi1
Atg5	Adnp2
Atl3	Adrbk1
Atp2c1	Ago2
Atp7a	Aimp1
Atp8a1	Akap13
Atpaf1	Akap9
Atrip	Akt2
Atxn10	Aldh5a1
Atxn7	Alg12
Avl9	Alkbh8
B3gnt1	Als2cl
B4galt4	Amot
B4galt5	Anapc11
Bag6	Angel2
Baz1b	Ank1
Bcam	Ankrd11
Bcl2l11	Ankzf1
Bet1l	Ano6
Bfar	Anxa11
Bloc1s6	Ap1s3
Bms1	Ap2a2
Bnc1	Ap3s2
Bod1l	Aplp2
Bpgm	Aqr
Bpnt1	Ar
Bptf	Arap1
Brwd1	Arf2
C77080	Arf3
Cab39	Arfgef2
Cadm4	Arhgap6
Cant1	Arhgef11
Capn5	Arhgef17
Cbfa2t2	Arhgef25
Cbl	Arhgef28
Cbx5	Arid5b
Ccdc132	Arih2
Ccdc163	Arl5a
Ccdc174	Arl6ip6
Ccdc85b	Armc5
Ccdc93	Armc8
Ccny	Arnt
Ccz1	Atf7
Cdc27	Atg4b
Cdc37l1	Atg5
Cdip1	Atl3
Cdk16	Atp1b1
Cdk2ap1	Atp2c1
Cdk5rap1	Atp6v0a2
Cdk7	Atp7a
Cdkn2aipnl	Atp8a1
Cds2	Atpaf1
Cebpa	Atrip
Cebpg	Atxn10
Celf1	Atxn3
Cep350	Atxn7
Cfl2	Atxn7l3b
Chmp5	Avl9
Chn1	B3gnt1
Clcn7	B4galt4
Clic5	B4galt5
Clk4	Bag6
Cnksr3	Bak1
Cnot7	Baz1b
Cog1	Bcam
Coprs	Bche
Coq3	Bcl2l11
Cp	Bcl6
Cpne3	Bet1l
Crbn	Bfar
Creb3l2	Bloc1s6
Crkl	Bms1
Crnkl1	Bnc1
Cryl1	Bnip2
Cryz	Bod1l
Cs	Bpgm
Csrnp2	Bpnt1
Cstf1	Bptf
Ctdsp2	Brat1
Ctla2b	Brcc3
Cutal	Brwd1
Cxcl1	Brwd3
Cyb5b	Btg3
Cyp1b1	C2
Cyp4a12a	C77080
Cyp4f16	Cab39
Cyth3	Cadm4
D10Wsu102e	Calm1
D1Ertd622e	Calm2
D2Wsu81e	Calm3
Daxx	Cant1
Dbndd2	Canx
Dcaf7	Capn1
Dcaf8	Capn5
Dcun1d1	Cav2
Dcun1d2	Cbfa2t2
Dcun1d3	Cbl
Dcun1d5	Cbx5
Ddah1	Ccdc132
Ddx39	Ccdc163
Ddx54	Ccdc174
Ddx59	Ccdc32
Decr1	Ccdc51
Dennd2d	Ccdc85b
Dffa	Ccdc93
Dicer1	Ccny
Dlat	Ccs
Dlgap4	Ccz1
Dnajc5	Cd36
Dnm2	Cdc27
Dock1	Cdc34
Dpy19l1	Cdc37
Dr1	Cdc37l1
Dstyk	Cdip1
E430018J23Rik	Cdk16
Eif2s1	Cdk2ap1
Eif4a2	Cdk5rap1
Elac1	Cdk7
Elk1	Cdkn2aipnl
Elmsan1	Cds2
Endod1	Cdv3
Enox2	Cebpa
Entpd5	Cebpg
Epm2aip1	Celf1
Epn1	Cep350
Ergic1	Cfl2
Ergic2	Cgrrf1
Erh	Chd8
Etv3	Chmp5
Evl	Chn1
Exoc6b	Chpt1
Ezh1	Cklf
Fam118b	Clcn7
Fam134c	Clic5
Fam168a	Clk4
Fam177a	Cln3
Fam210a	Cmip
Fasn	Cmtm3
Fbxl20	Cmtr2
Fbxo3	Cnih4
Fbxw11	Cnksr3
Flnb	Cnnm3
Fn1	Cnot6
Fndc3b	Cnot7
Fosl1	Cnp
Fosl2	Coa5
Fyco1	Cog1
Gapvd1	Col4a3bp
Gas5	Coprs
Gcnt1	Coq3
Ggta1	Cp
Gle1	Cpd
Gls	Cpne3
Glyat	Cpt1a
Gm12372	Crbn
Gm14057	Creb3l2
Gm21451	Crkl
Gm21540	Crnkl1
Gm21571	Cryl1
Gm3579	Cryz
Gm3912	Cs
Gm6747	Csrnp2
Gm6910	Cstf1
Gna13	Ctdsp2
Gng12	Ctla2b
Golga2	Ctsb
Golga7	Ctsc
Gorab	Ctu1
Gpc6	Cutal
Gpr137	Cwf19l2
Gpr89	Cxcl1
Gramd3	Cyb5b
Gskip	Cyhr1
Gtf2ird1	Cyp1b1
Gtf3c2	Cyp4a12a
Gtpbp8	Cyp4f16
H2-D1	Cyth3
H2-L	D10Wsu102e
H2afz	D1Ertd622e
Heatr5b	D2Wsu81e
Hexdc	D3Ertd751e
Hiatl1	D430020J02Rik
Hipk1	Dag1
Hipk3	Dancr
Hist3h2a	Daxx
Hivep2	Dbndd2
Hmgxb4	Dcaf7
Hnf4a	Dcaf8
Hoxb3	Dcun1d1
Hsd17b14	Dcun1d2
Hspa4l	Dcun1d3
Hspb1	Dcun1d5
Htra2	Dda1
Ier5	Ddah1
Igfbp4	Ddx24
Ikbkg	Ddx39
Ilkap	Ddx46
Ilvbl	Ddx54
Ing1	Ddx59
Inip	Decr1
Ino80d	Dedd
Ints8	Dennd2d
Irak3	Dffa
Jak3	Dhx30
Jrk	Dicer1
Kat6a	Dido1
Khnyn	Dip2a
Kidins220	Dlat
Kif3b	Dlgap4
Klf3	Dnajb6
Klhdc10	Dnajc5
Kpna4	Dnm2
Kxd1	Dnmt1
LOC100503822	Dnmt3a
LOC101056061	Dock1
LOC102641618	Dock11
LOC102642487	Dpy19l1
LOC497255	Dr1
Lactb2	Dstyk
Larp7	Dusp22
Lats2	E430018J23Rik
Ldlrad4	Efna1
Letmd1	Efnb1
Lipa	Ehd1
Lman1	Eif2d
Lnpep	Eif2s1
Loxl2	Eif2s3x
Lpcat4	Eif4a2
Lphn3	Eif4e2
Lpin1	Elac1
Lpp	Elf3
Lrp6	Elk1
Lrrc14	Elmsan1
Lrrc57	Endod1
Lrrc61	Enox2
Lrrk1	Entpd5
Lynx1	Eny2
Lysmd1	Epm2aip1
Lysmd4	Epn1
Lztfl1	Eral1
Magi3	Ergic1
Mal	Ergic2
Man1a	Erh
Manba	Etv3
Maoa	Etv6
Map3k4	Evl
Mapk8	Exoc6b
Mapk9	Ezh1
Mb21d2	F11r
Mbnl2	Fam114a2
Mbtd1	Fam118b
Mdp1	Fam134c
Med20	Fam168a
Meis1	Fam177a
Mesdc1	Fam208b
Mettl21a	Fam210a
Mettl7a1	Fam45a
Mief2	Far1
Mitf	Fasn
Mkl2	Fbxl20
Mllt4	Fbxl5
Mob1a	Fbxo22
Mob3c	Fbxo3
Morf4l1	Fbxo31
Mpp7	Fbxo38
Mrgbp	Fbxw11
Mrpl51	Fbxw2
Mrps5	Fgfr1op2
Mrs2	Fkbp3
Ms4a4b	Fkbp7
Msi2	Flcn
Mthfd2l	Flnb
Mycbp2	Fmr1
Mylk	Fn1
Myo1d	Fndc3b
Myo9b	Fosl1
N4bp2	Fosl2
Naa20	Foxa3
Nabp1	Fra10ac1
Nadk2	Fryl
Nadsyn1	Fundc2
Naga	Fyco1
Nap1l3	Fyttd1
Nbr1	Gapvd1
Nck2	Gas5
Nckap1	Gcnt1
Ncoa3	Ggta1
Ncoa7	Gle1
Ndufa12	Glg1
Ndufa2	Gls
Necap1	Glyat
Neurl4	Gm10094
Nin	Gm10349
Ninj1	Gm10451
Nkap	Gm12372
Notch1	Gm14057
Npepps	Gm16536
Nphp1	Gm21451
Nr1i2	Gm21540
Nrf1	Gm21571
Nsd1	Gm21596
Nt5c2	Gm2260
Ntn4	Gm2274
Nub1	Gm3579
Nucks1	Gm3912
Nudt13	Gm4120
Oaf	Gm4983
Ogdh	Gm6115
Ormdl1	Gm6747
Pabpn1	Gm6910
Pafah1b2	Gm7334
Paqr5	Gm9292
Pbx2	Gm9386
Pcmt1	Gna13
Pde4dip	Gng12
Pdk1	Golga2
Pdk2	Golga7
Pdlim5	Golt1b
Pdx1	Gorab
Pdxdc1	Gpc6
Peli1	Gpr137
Pex6	Gpr89
Pfkp	Gramd3
Phc3	Gsdmd
Phf20	Gskip
Phf3	Gtf2a2
Phip	Gtf2ird1
Phospho2	Gtf3c2
Pi4k2a	Gtpbp8
Pign	Gys1
Pitpnm1	H2-D1
Plekhm3	H2-K1
Plod2	H2-L
Plrg1	H2afz
Plxna3	Habp4
Pnpla2	Hars
Pofut1	Haus2
Pole4	Hdac5
Polr2b	Hdhd3
Polr3b	Heatr5b
Polr3c	Hexdc
Pomk	Hhex
Ppap2a	Hiatl1
Ppm1b	Hif1an
Ppp1r2	Hipk1
Ppp2r3c	Hipk3
Ppp2r5e	Hist1h3b
Prdm2	Hist1h3c
Prkca	Hist1h3d
Prkd3	Hist1h3e
Prrc2b	Hist1h3f
Prrg1	Hist2h3b
Ptdss2	Hist2h3c1
Ptgr2	Hist2h3c2
Ptpmt1	Hist3h2a
Ptpn13	Hivep2
Ptprk	Hmgb1
R3hdm2	Hmgxb4
Rab22a	Hnf4a
Rab27a	Hnrnpul2
Rab2b	Hoxb3
Rab40c	Hsd17b14
Rad51d	Hspa4
Rap2b	Hspa4l
Rasal1	Hspb1
Rasip1	Htra2
Rbbp7	Htt
Rbl2	Ick
Rbm14-rbm4	Icmt
Rbm17	Ier5
Rbm4	Ift122
Rbm5	Igf2bp2
Rcan1	Igfbp4
Rcor1	Ikbkb
Recql	Ikbkg
Reg3b	Il4ra
Relb	Ilkap
Repin1	Ilvbl
Rgmb	Ing1
Rhobtb3	Ing5
Ribc1	Inip
Rnf14	Ino80
Rnf19b	Ino80d
Rnf39	Inpp4a
Rnf41	Inpp5e
Rora	Ints8
Rpap2	Iqgap1
Rpe	Irak1
Rpl14	Irak3
Rpl14-ps1	Irf3
Rprd1a	Irs2
Rprd2	Isoc1
Rps11	Jak1
Rps12	Jak3
Rps12-ps10	Jrk
Rps12-ps11	Kat6a
Rps12-ps12	Kat7
Rps12-ps13	Kbtbd7
Rps12-ps14	Khdrbs1
Rps12-ps15	Khnyn
Rps12-ps16	Kidins220
Rps12-ps18	Kif3b
Rps12l2	Kitl
Rps25	Klf3
Rps6kb2	Klhdc10
Rsad1	Klhdc3
Rybp	Klhl24
Sae1	Klhl28
Scamp5	Kpna1
Scrn2	Kpna4
Sdccag3	Kti12
Sdf4	Kxd1
Sdhaf1	LOC100503822
Sdhaf2	LOC100861749
Sec63	LOC100862433
Senp8	LOC101055823
Sephs2	LOC101056061
Serf1	LOC102635075
Serinc3	LOC102641618
Sesn1	LOC102641972
Setx	LOC102642487
Sf3a3	LOC102642697
Sf3b1	LOC497255
Sft2d2	Lactb2
Shc1	Larp7
Shisa4	Lats2
Shoc2	Ldlrad4
Six5	Leo1
Skp2	Letmd1
Slain2	Lipa
Slc25a10	Lman1
Slc35a3	Lnpep
Slc35a5	Loxl2
Slc35f6	Lpcat4
Slc39a9	Lphn3
Slc43a2	Lpin1
Slc9a9	Lpp
Slco2a1	Lrp5
Smarca4	Lrp6
Smarcd2	Lrpap1
Smc1a	Lrrc14
Smo	Lrrc57
Smyd4	Lrrc61
Snapc4	Lrrk1
Snrpe	Lsm12
Snta1	Ly6a
Snx13	Lynx1
Snx16	Lysmd1
Socs4	Lysmd4
Sox13	Lzic
Spin1	Lztfl1
Spsb2	Macf1
Sptan1	Magef1
Sptbn1	Magi3
Srd5a3	Magt1
Srsf3	Mal
Srsf9	Man1a
Srxn1	Man2b1
St3gal4	Manba
St7l	Maoa
Stag1	Map2k2
Stag2	Map3k4
Stx18	Mapk8
Stx2	Mapk9
Stx6	Mapre1
Suco	Mark3
Suv420h2	Mark4
Syne1	Mb21d2
Taf1d	Mbnl2
Taf9	Mbtd1
Tbc1d15	Mdp1
Tbc1d20	Mea1
Tcf3	Meaf6
Tctn3	Med20
Telo2	Med7
Tenm3	Meis1
Tfdp2	Mesdc1
Tgfbr1	Metap1d
Tgfbrap1	Metap2
Thnsl1	Mettl13
Thpo	Mettl21a
Tial1	Mettl6
Tiprl	Mettl7a1
Tjp2	Mff
Tm2d2	Mfsd1
Tm7sf3	Mgrn1
Tm9sf3	Mia3
Tmcc3	Mid2
Tmed2	Mief2
Tmed3	Mir17hg
Tmed7	Mir92-1
Tmem17	Mitf
Tmem19	Mkl2
Tmem201	Mkrn1
Tmem29	Mllt4
Tmem33	Mlst8
Tmem38b	Mlxip
Tmem64	Mmp19
Tmod3	Mob1a
Tnrc6a	Mob3c
Tnrc6b	Morf4l1
Tns3	Mpp7
Tollip	Mrgbp
Tor3a	Mroh1
Tpgs2	Mrpl11
Tpm1	Mrpl36
Tpr	Mrpl41
Tprn	Mrpl44
Trabd	Mrpl51
Traf4	Mrps5
Trappc13	Mrs2
Trim17	Ms4a4b
Trim37	Msi2
Trim46	Mthfd2l
Trip12	Mtmr9
Trmt1	Mtus1
Ttc3	Mtx3
Tti2	Mul1
Tube1	Mvp
Tyw5	Mycbp2
Uba2	Myef2
Uba52	Mylk
Ubac2	Myo1b
Ube2d2a	Myo1d
Ube2d3	Myo1e
Uevld	Myo9b
Uhmk1	N4bp2
Upf3b	ND5
Usf2	Naa20
Usp22	Naa30
Usp3	Nabp1
Usp30	Nacc1
Utp23	Nadk2
Utrn	Nadsyn1
Vangl1	Naga
Vav3	Nap1l3
Vhl	Naprt1
Vma21	Nat9
Vnn1	Nbr1
Vps26b	Nck2
Vps37c	Nckap1
Vwa5a	Ncoa3
Wbp1l	Ncoa7
Wdfy1	Ncor1
Wdr19	Ndrg1
Wdr33	Ndufa12
Wdr47	Ndufa2
Wdr7	Necap1
Wdyhv1	Nedd1
Wls	Nelfcd
Wnk1	Neurl4
Wwc2	Nfib
Xpr1	Nfix
Ybx3	Nfxl1
Ywhab	Nin
Ywhag	Ninj1
Ywhaz	Nipbl
Yy1	Nkap
Zbed6	Notch1
Zbtb40	Npcd
Zbtb7b	Npepps
Zc3h11a	Nphp1
Zc3h12a	Nptxr
Zc3hc1	Nr1i2
Zdhhc17	Nr4a1
Zdhhc3	Nrf1
Zfhx3	Nsd1
Zfp148	Nt5c2
Zfp157	Ntn4
Zfp191	Nub1
Zfp260	Nucks1
Zfp275	Nudt13
Zfp292	Nudt7
Zfp316	Nudt8
Zfp318	Nupl1
Zfp597	Nutf2
Zfp654	Nutf2-ps1
Zfp68	Oaf
Zfp945	Ogdh
Zfr	Orai2
Zfyve19	Ormdl1
Zkscan1	Osbpl9
Zmym2	Pabpn1
Zranb3	Pafah1b2
Zswim1	Pah
	Paip1
	Papola
	Papss2
	Paqr5
	Pbrm1
	Pbx2
	Pcmt1
	Pcnp
	Pcyox1
	Pcyt1a
	Pddc1
	Pde4dip
	Pdk1
	Pdk2
	Pdlim5
	Pds5b
	Pdx1
	Pdxdc1
	Pdzrn3
	Peak1
	Peli1
	Pex16
	Pex3
	Pex6
	Pfkp
	Pgrmc2
	Phc3
	Phf20
	Phf20l1
	Phf3
	Phip
	Phospho2
	Pi4k2a
	Pigk
	Pign
	Pik3c2g
	Pip4k2c
	Pitpnm1
	Pkig
	Plekhm3
	Plod1
	Plod2
	Plrg1
	Plxna2
	Plxna3
	Pmpcb
	Pnpla2
	Pnpo
	Pofut1
	Pole4
	Polr2b
	Polr3b
	Polr3c
	Pomk
	Ppap2a
	Ppapdc2
	Ppm1b
	Ppme1
	Ppp1r2
	Ppp2r3c
	Ppp2r5e
	Ppp4r1l-ps
	Ppp6r3
	Prdm2
	Prdx5
	Prkca
	Prkd3
	Prrc2b
	Prrg1
	Psma1
	Psme4
	Ptdss2
	Ptgr2
	Ptplb
	Ptpmt1
	Ptpn13
	Ptprj
	Ptprk
	Ptprm
	Ptprs
	Pura
	R3hdm1
	R3hdm2
	Rab14
	Rab22a
	Rab27a
	Rab27b
	Rab2b
	Rab40c
	Rad51d
	Ralgapa1
	Ralgds
	Ralgps2
	Rap2b
	Rapgef6
	Rasal1
	Rasip1
	Rbbp7
	Rbbp8
	Rbfox2
	Rbl2
	Rbm14-rbm4
	Rbm17
	Rbm25
	Rbm33
	Rbm4
	Rbm5
	Rc3h2
	Rcan1
	Rcor1
	Recql
	Recql5
	Reg1
	Reg3b
	Relb
	Repin1
	Rfx7
	Rgmb
	Rhobtb3
	Ribc1
	Rnf14
	Rnf19b
	Rnf39
	Rnf41
	Rora
	Rpap2
	Rpe
	Rpl11
	Rpl13a
	Rpl14
	Rpl14-ps1
	Rpl35
	Rprd1a
	Rprd2
	Rps11
	Rps12
	Rps12-ps10
	Rps12-ps11
	Rps12-ps12
	Rps12-ps13
	Rps12-ps14
	Rps12-ps15
	Rps12-ps16
	Rps12-ps18
	Rps12l2
	Rps16
	Rps16-ps2
	Rps17
	Rps20
	Rps24
	Rps25
	Rps6kb2
	Rsad1
	Rtn3
	Rybp
	Sae1
	Sall2
	Sap18
	Scamp5
	Scarf2
	Scrn2
	Sdccag3
	Sdf4
	Sdhaf1
	Sdhaf2
	Sec16a
	Sec63
	Seh1l
	Sel1l
	Senp8
	Sephs2
	Serf1
	Serinc1
	Serinc3
	Serpinb8
	Sertad4
	Sesn1
	Sestd1
	Setd5
	Setx
	Sf3a3
	Sf3b1
	Sfi1
	Sft2d2
	Sgms1
	Sh3bgrl2
	Sh3bgrl3
	Shc1
	Shisa4
	Shoc2
	Siae
	Six5
	Skp2
	Slain2
	Slc11a2
	Slc12a6
	Slc25a10
	Slc25a23
	Slc25a29
	Slc35a3
	Slc35a5
	Slc35f6
	Slc37a1
	Slc39a6
	Slc39a9
	Slc43a2
	Slc4a4
	Slc7a1
	Slc9a9
	Slco2a1
	Slk
	Smad3
	Smarca4
	Smarcc1
	Smarcd2
	Smc1a
	Smo
	Smyd4
	Snapc4
	Snrpb2
	Snrpe
	Snta1
	Snupn
	Snx13
	Snx16
	Snx18
	Socs4
	Sox13
	Spata7
	Spats2l
	Spin1
	Sppl2b
	Spryd4
	Spsb2
	Sptan1
	Sptbn1
	Srbd1
	Srd5a3
	Srsf3
	Srsf9
	Srxn1
	St3gal4
	St7l
	Stag1
	Stag2
	Stambp
	Stc1
	Stx16
	Stx18
	Stx2
	Stx6
	Suco
	Sugt1
	Sumf1
	Suv420h2
	Syap1
	Syne1
	Tacc2
	Taf1d
	Taf2
	Taf9
	Taok3
	Tax1bp1
	Tbc1d15
	Tbc1d20
	Tbc1d24
	Tcf3
	Tcn2
	Tctn3
	Tead2
	Telo2
	Tenm3
	Tfdp2
	Tfeb
	Tfpt
	Tgfbr1
	Tgfbrap1
	Thap1
	Thnsl1
	Thpo
	Tial1
	Tiprl
	Tjp2
	Tle2
	Tm2d1
	Tm2d2
	Tm7sf3
	Tm9sf2
	Tm9sf3
	Tmcc3
	Tmed2
	Tmed3
	Tmed7
	Tmem126a
	Tmem127
	Tmem161a
	Tmem17
	Tmem19
	Tmem2
	Tmem201
	Tmem29
	Tmem33
	Tmem38b
	Tmem64
	Tmem87a
	Tmod3
	Tmtc4
	Tnrc6a
	Tnrc6b
	Tns3
	Tollip
	Tor3a
	Tox
	Tpcn1
	Tpgs2
	Tpm1
	Tpr
	Tprn
	Trabd
	Traf3
	Traf4
	Trak1
	Trappc11
	Trappc13
	Trim17
	Trim26
	Trim37
	Trim41
	Trim44
	Trim46
	Trip12
	Trmt1
	Trp53bp1
	Tsn
	Ttc3
	Ttc9c
	Tti2
	Tube1
	Tubgcp3
	Tug1
	Tyw5
	Uba2
	Uba3
	Uba52
	Ubac2
	Ubc
	Ube2d2a
	Ube2d3
	Ube2e2
	Ublcp1
	Ubn2
	Uevld
	Ugcg
	Uggt2
	Ugt1a1
	Ugt1a10
	Ugt1a2
	Ugt1a5
	Ugt1a6a
	Ugt1a6b
	Ugt1a7c
	Ugt1a9
	Uhmk1
	Upf3b
	Use1
	Usf2
	Usp22
	Usp3
	Usp30
	Usp5
	Utp23
	Utrn
	Uxs1
	Vangl1
	Vav3
	Vcl
	Vcp
	Vegfa
	Vhl
	Vkorc1l1
	Vma21
	Vnn1
	Vopp1
	Vps13a
	Vps18
	Vps26b
	Vps37c
	Vps53
	Vwa5a
	Wbp1l
	Wdfy1
	Wdr19
	Wdr33
	Wdr47
	Wdr5b
	Wdr7
	Wdyhv1
	Wipi2
	Wls
	Wnk1
	Wwc2
	Xpr1
	Ybx3
	Yipf4
	Yme1l1
	Ythdf3
	Ywhab
	Ywhag
	Ywhaz
	Yy1
	Zbed6
	Zbtb20
	Zbtb40
	Zbtb7b
	Zbtb8a
	Zc3h11a
	Zc3h12a
	Zc3hc1
	Zcchc14
	Zdhhc17
	Zdhhc3
	Zdhhc6
	Zfhx3
	Zfp148
	Zfp157
	Zfp191
	Zfp260
	Zfp275
	Zfp277
	Zfp292
	Zfp316
	Zfp318
	Zfp365
	Zfp36l2
	Zfp597
	Zfp606
	Zfp647
	Zfp654
	Zfp68
	Zfp787
	Zfp871
	Zfp945
	Zfr
	Zfyve19
	Zfyve27
	Zhx3
	Zik1
	Zkscan1
	Zkscan8
	Zmym2
	Zmym3
	Zranb3
	Zswim1
	Zswim3
