# Supplementary material for: 12-h clock regulation of genetic information flow by XBP1s
Source: PLoS Biol. 2020 Jan 14;18(1):e3000580. doi: 10.1371/journal.pbio.3000580 (PMC6959563; doi:10.1371/journal.pbio.3000580)
Supplement: S12 Table — RPKM quantification and eigenvalue/pencil-identified 12-h rhythm of XBP1s cistrome. (XLSX) [file pbio.3000580.s019.xlsx]

## Sheet: Sheet1
chromosome	start	end	WT_XBP1_ChIP-Seq_CT0.bigwig_1	WT_XBP1_ChIP-Seq_CT4.bigwig_9	WT_XBP1_ChIP-Seq_CT8.bigwig_12	WT_XBP1_ChIP-Seq_CT12.bigwig_2	WT_XBP1_ChIP-Seq_CT16.bigwig_3	WT_XBP1_ChIP-Seq_CT20.bigwig_4	WT_XBP1_ChIP-Seq_CT24.bigwig_5	WT_XBP1_ChIP-Seq_CT28.bigwig_6	WT_XBP1_ChIP-Seq_CT32.bigwig_7	WT_XBP1_ChIP-Seq_CT36.bigwig_8	WT_XBP1_ChIP-Seq_CT40.bigwig_10	WT_XBP1_ChIP-Seq_CT44.bigwig_11	LKO_XBP1_ChIP-Seq_CT0.bigwig_0	Associated gene(s) (Distance to TSS in bp)	Decay rate	Period	Phase	Relative amplitude
chrY	29096258	29096432	83.03	69.56	68.58	83.5	75.04	89.3	79.71	74.67	76.64	89.23	71.24	81.92	11.97	Gm20810 (+362847)	1.00859	12.0635	11.3558	0.0843187
chr14	20674174	20674424	37.86	6.288	7.725	60.02	26.08	23.85	104.5	11.84	61.38	86.41	53.17	34.2	2.089	Sec24c (-22)	1.08651	11.6022	0.470016	0.537562
chrX	33416451	33416526	70.13	30.63	52.7	60.78	49.38	57.54	68.7	56.51	55.71	78.36	58.66	63.97	15.49	Gm2854 (+17075), Gm2913 (+160857)	1.11421	11.7822	11.4192	0.0473479
chr4	47474278	47474684	46.5	5.947	4.664	47.3	19.88	14.37	73.88	13.16	32.09	73.68	26.85	24	1.453	Sec61b (-177), Alg2 (-148)	1.06031	11.8084	0.311626	0.792215
chr6	108044064	108044171	47.01	55.41	55.72	82.93	79.64	68.35	61.44	69.06	62.27	47.42	77.68	54.56	2.881	Setmar (-20927), Lrrn1 (+514392)	1.14134	11.424	3.72383	0.138097
chr16	38562712	38562873	43.62	7.856	7.412	43.88	12.76	10.16	75.46	10.81	23.63	71.29	29.79	17.1	1.944	Tmem39a (-19)	1.07898	11.9363	0.10852	0.700444
chr17	56183837	56184073	42.07	2.693	2.209	48.07	9.94	9.068	88.8	4.628	28.77	49.58	21.9	16.11	3.373	Mydgf (-35)	1.04956	11.7405	0.221342	0.865496
chr16	11134523	11134920	37.72	4.339	4.604	49.82	14.79	13.23	74.84	3.518	38.89	53.1	34.86	13.95	4.546	Txndc11 (-72)	1.03836	11.642	0.400094	0.84301
chr6	103314604	103314719	73.72	103.6	33.45	124.7	78.06	90.68	3.642	112.2	1.762	6.967	29.6	16.14	3.772	Cntn3 (-849995), Chl1 (-196214)	1.17155	12.7642	0.168279	0.168679
chr2	144165415	144165796	35.51	5.132	5.679	36.64	11.31	11.14	72.62	4.368	31.62	58.79	30.37	12.94	2.487	Mgme1 (-105294), Banf2 (+132547)	1.09555	11.8163	0.112415	0.612973
chr12	25311289	25311375	42.87	56.43	41.5	59.78	40.61	49.17	45.1	44.73	45.91	49.47	38.47	44.48	1.87	Id2 (-215240)	0.982211	11.2685	0.417106	0.0936075
chr2	119226483	119226553	54.56	55.48	41.07	46.42	37.44	33.53	57.98	51.9	28.48	33.94	53.15	42.29	20.39	Dnajc17 (-17723), Ppp1r14d (+3388)	0.939958	12.6978	0.908923	0.323603
chr3	63964640	63964878	34.62	3.797	4.618	39.05	15.45	16.7	59.44	6.497	45.58	59.13	31.47	26.72	2.109	Slc33a1 (+9)	1.08885	11.5907	0.259445	0.654073
chr10	86705400	86705821	28.66	6.349	3.73	41.39	14.91	17.39	63.47	9.081	33.1	48.7	36	17.47	4.946	BC030307 (-200), Hsp90b1 (-102)	1.05472	11.6258	0.518715	0.622655
chr14	75754488	75754669	34.61	4.14	4.867	38.8	12.49	13.67	51.01	6.137	17.61	55.63	24.74	13.87	4.372	Cog3 (-86)	1.03564	11.8531	11.3046	0.85381
chr2	75658907	75659229	31.48	6.274	2.565	43.61	15.6	15.52	54.6	15.19	36.57	46.79	36.45	23.37	2.409	Hnrnpa3 (-193)	0.968348	11.5647	0.651281	0.935608
chr10	127041887	127042044	35.03	3.65	6.461	30.82	5.131	6.537	62.73	8.521	17.61	44.82	26.19	11.25	2.828	Mettl21b (-453), Mettl1 (+34)	1.05535	12.1412	12.0635	0.726195
chr1	183369533	183369727	36.55	3.717	3.788	38.36	15.59	7.268	52.59	7.98	27.78	41.68	24.22	19.98	4.479	Mia3 (-101)	0.97777	11.6457	0.596703	1.07469
chr7	141539788	141539971	23.81	2.73	3.887	41.95	21.09	17.76	56.79	4.789	27.94	45.65	18.93	12.78	4.856	Chid1 (-23)	1.07167	11.5794	0.48855	0.723689
chr5	124540605	124540827	38.03	2.09	3.282	36.41	12.16	9.246	50.63	10.05	23.81	40.97	22.31	9.57	0	Tmed2 (+21)	0.988468	11.8648	0.208052	1.10947
chr19	60790662	60791019	33.44	4.242	5.208	38.09	11.51	11.01	48.22	6.595	18.31	45.51	24.8	17.95	4.519	Eif3a (-148)	1.02589	11.8772	0.206397	0.905609
chr2	121413839	121413983	34.93	5.042	7.971	35.9	17.28	16.13	39.05	13.02	28.27	54.83	20	17.85	5.73	Catsper2 (-119), Pdia3 (+136)	1.03221	12.0515	11.7135	0.571164
chr13	110603047	110603124	30.1	35.62	43.48	61.24	40.61	20.31	33.21	34.96	24.82	36.28	32.23	20.52	17.9	Actbl2 (-651927), Plk2 (+208042)	0.933407	12.5801	0.492425	0.389086
chr10	42761351	42761628	19.66	3.806	5.181	35.66	10.7	11.24	57.89	5.202	26.98	43.89	22.88	10.05	3.064	Sec63 (-6)	1.07189	11.6794	0.393013	0.605678
chr1	131275050	131275269	20.49	6.34	4.725	34.67	13.1	11.02	59.98	7.642	31.79	40.26	21.63	15.32	0	Rassf5 (-29902), Ikbke (+4446)	1.07087	11.4883	0.677666	0.5422
chr3	130709387	130709713	28.77	3.902	3.232	30.09	9.33	6.865	50.69	4.562	26.12	45.56	17.97	10.74	1.723	Ostc (-106)	1.06728	11.7227	0.31731	0.803373
chr1	88277483	88277722	36.63	13.82	17.8	34.05	18.28	20.8	30.39	14.68	45.69	53.58	22.73	24.34	9.858	Hjurp (+30)	1.01365	10.9583	0.644891	0.511305
chr3	58525765	58526078	22.28	3.884	4.269	32.79	11.26	7.24	56.82	5.482	33.43	42.42	22.02	11.4	4.185	Serp1 (-49), Eif2a (+101)	1.06627	11.5488	0.540492	0.649141
chr9	121718915	121719294	22.05	3.059	1.077	33.09	8.488	6.772	55.66	2.239	25.38	39.89	14.63	8.698	2.825	Nktr (-71)	1.06726	11.5718	0.543146	0.784367
chr11	5520767	5521074	25.05	4.598	7.82	38	17.4	17.41	44.84	12.1	25.64	41.76	40.64	32.06	3.561	Xbp1 (+262)	1.00533	11.7944	0.593353	0.698792
chr18	46597493	46597725	15.91	3.673	2.416	32.35	13.08	5.713	64.7	4.708	31.76	35.04	19.2	11.81	1.335	Eif1a (-95), Tmed7 (-74)	1.07611	11.3936	0.886224	0.559321
chr11	120573212	120573489	27.56	3.594	3.305	29.45	11.26	9.373	45.31	6.301	30.39	45.6	15.82	10.43	1.543	P4hb (-98)	1.00715	11.3172	1.02923	0.936599
chr1	13589317	13589506	24.12	2.999	4.328	28.25	9.577	7.734	51.58	5.897	6.577	43.7	21.83	10.94	2.075	Tram1 (+452)	1.11917	12.3615	0.920192	0.612096
chr15	89078301	89078397	16.1	3.176	0.7197	35.13	13.86	11.4	58.01	4.055	18.38	37.02	32.2	17.85	0	1300018J18Rik (-10735), Trabd (+2336)	1.05968	11.6985	0.760097	0.56225
chr6	28479943	28480370	20.67	4.493	2.096	37.37	13.3	9.816	44.24	7.549	30.85	43.18	25.37	11.08	0	Snd1 (-191)	1.04418	11.4453	0.699959	0.829911
chr1	167340271	167340397	27.91	30.81	18.32	45.35	26.19	16.94	36.25	23.3	29.74	35.79	32.79	26.41	15.97	Aldh9a1 (-9657), Tmco1 (+31664)	0.860257	11.356	1.53701	0.77668
chr5	123135534	123135724	28.7	3.66	3.124	27.7	10.72	8.98	45.19	3.399	22.67	43.42	18.79	14.92	2.411	Rhof (-2937)	1.07503	11.7563	0.249021	0.74664
chr11	95384472	95384939	20.5	3.788	4.956	28.81	11.18	9.708	53.26	4.488	27.15	41.8	20.24	16.56	3.359	Slc35b1 (+14)	1.09302	11.633	0.3603	0.525173
chr8	60685235	60685312	37.03	36.94	23.88	40.3	33.97	33.87	38.97	39.42	41.04	27.89	39.56	45.09	13.7	2700029M09Rik (-205177), Mfap3l (+52414)	0.802246	10.5875	1.79711	0.410662
chr9	89704917	89705121	26.53	3.835	3.787	30.17	7.846	7.144	51.38	3.437	16.25	35.13	16.06	8.792	4.418	Tmed3 (+24)	1.05989	11.8172	0.181575	0.766317
chr19	6980398	6980515	32.36	1.936	0.02684	26.29	11.95	8.279	46.11	4.258	19.46	37.97	25.47	12.52	0.5363	Fkbp2 (-17)	1.03638	11.8369	0.26994	0.896798
chr2	26933341	26933572	30.67	6.011	8.728	37.21	14.1	8.63	38.07	7.133	18.87	35.07	16.11	13.47	3.205	Gm711 (-612), Surf4 (+471)	0.985368	11.7776	0.304015	0.987156
chr13	9834309	9834500	28.71	18.1	20.14	48.39	22.27	21.65	29.42	22.13	24.54	34.06	21.33	32.88	9.416	Zmynd11 (-69091), Chrm3 (+44593)	0.803857	11.3493	0.908598	1.0096
chr9	66059975	66060247	24.23	5.627	4.63	29.3	12.1	7.852	47.83	3.745	20.5	39.03	16.94	11.53	2.884	Ppib (-58)	1.07635	11.6777	0.459748	0.657966
chr9	44379140	44379592	26.12	3.852	5.037	28.71	12.6	6.828	44.99	7.087	20.92	39.62	18.17	12.26	0.708	Hyou1 (-207)	1.04685	11.7651	0.384187	0.767133
chr17	34122266	34122394	32.35	6.332	1.644	30.72	10.84	7.104	35.76	9.831	18.16	39.28	19.28	17.08	0.4657	Brd2 (-583)	0.974355	11.5898	0.77285	1.04432
chr2	34771899	34772177	18.05	5.267	6.524	39.47	13.38	11.73	43.34	14.6	25.07	36.07	39.21	25.64	4.113	Hspa5 (-57)	0.88964	11.9532	0.196631	1.30343
chr10	128303170	128303608	26.99	5.786	2.323	29.09	10.67	10.73	39.25	4.592	26.18	41.56	21.92	15.01	3.76	Pan2 (+54)	1.06344	11.4151	0.889959	0.713998
chr5	130222208	130222435	20.63	3.975	3.12	32.29	10.51	10.63	45.93	5.389	20.43	37.84	21.38	17.91	3.203	Tmem248 (-13)	1.04431	11.6567	0.484995	0.703268
chr6	38533608	38533784	25.03	2.449	0.9278	20.77	7.4	9.172	59.28	1.09	20.63	31.3	12.04	4.467	4.403	1110001J03Rik (-1127)	1.11007	11.7183	0.0740254	0.545249
chr3	95951256	95951339	26.5	4.352	3.613	26.71	12.25	13.7	55.75	2.512	25.13	27.25	21.29	15.22	1.399	Anp32e (+22052), Plekho1 (+44703)	1.07035	11.5949	0.24925	0.562159
chr13	55592997	55593245	22.62	2.691	4.071	34.42	9.109	11.02	42.39	3.69	13.21	36.54	19.63	8.257	2.034	Tmed9 (-14)	1.0409	11.8601	0.267827	0.838812
chrX	126773109	126773179	34.57	15.18	15.77	37.96	34.48	28.75	23.15	25.01	43.83	40.15	30.48	42.21	12.21	4932411N23Rik (+60860)	0.999675	10.1948	1.53532	0.28115
chr1	58711439	58711518	20.25	6.122	6.46	25.93	8.535	8.68	50.22	1.144	17.68	39.12	15.2	19.9	0.2581	Cflar (-81)	1.15381	11.968	0.541562	0.503508
chr7	29238312	29238537	18.84	3.26	4.055	35.02	6.546	13.59	40.54	3.444	17.6	40.84	14.81	7.232	4.078	Yif1b (+72)	1.04328	11.6285	0.51487	0.921095
chr4	145834167	145834230	36.99	25.13	23.18	34.6	32.33	24.26	41.36	30.02	35.32	21.55	32.64	23.51	12.4	Gm13235 (-34595), Gm13242 (+163514)	0.851278	12.0041	0.814031	0.338006
chr3	95950707	95951191	20.51	3.961	3.715	23.86	9.452	8.583	50.58	6.767	14.53	38.69	22.75	12.73	3.332	Anp32e (+21703), Plekho1 (+45052)	1.09722	11.9428	0.207722	0.44612
chr10	50592494	50592710	25.67	3.752	6.194	29.78	5.389	9.997	42.27	6.868	14.45	35.81	17.49	11.44	4.408	Ascc3 (-67)	1.04359	12.0058	11.8838	0.75059
chr3	8923483	8923646	25.32	6.167	4.932	32.15	6.564	10.82	39.95	7.856	23.25	34.8	17.94	10.56	5.384	Mrps28 (+353)	1.02314	11.6217	0.367648	0.799552
chr19	10204167	10204252	26.02	1.729	4.526	27.67	5.845	7.213	34.2	6.252	16.32	43.83	13.85	13.77	0	Fen1 (-41), Tmem258 (+196)	1.03379	11.7987	0.150353	0.890621
chr18	35815607	35815764	39.11	1.7	3.961	24.34	10.93	10.23	41.9	4.948	14.42	25.81	17.18	11.77	2.932	Cxxc5 (-14132), Ube2d2a (+44127)	0.980331	11.9411	11.9375	1.12183
chr3	89293671	89293835	19.32	2.456	3.351	27.1	6.979	12.95	46.98	4.804	28.21	37.5	12.27	11.34	1.172	Efna1 (-14108), Efna3 (+29212)	1.09155	11.5931	0.204748	0.601653
chr5	100416441	100416589	30.2	5.477	7.331	27.85	7.961	9.737	41.49	7.194	12.64	31.28	18.77	17.46	0.7684	Sec31a (-281)	1.03051	12.0074	12.0026	0.851073
chr19	11965435	11965537	29.11	3.505	1.847	19.01	4.332	4.095	40.05	1.628	14.51	42.39	14.13	5.915	2.284	Osbp (-358)	1.1128	11.9469	0.0172378	0.691155
chr6	37597228	37597308	33.42	4.53	3.258	39.79	10.74	9.145	18.92	5.766	31.24	37.68	13.54	11.66	0.5294	Trim24 (-273543), Akr1d1 (+67095)	0.87551	11.1641	0.826611	1.47825
chr9	106891915	106892170	30.07	3.769	1.693	25.7	7.55	7.347	41.81	4.595	19.23	32	14.79	11.26	3.23	Manf (-64)	1.02444	11.7396	0.275811	0.981402
chr4	25281459	25281932	23.82	3.575	5.902	28.49	8.869	8.119	39.93	4.232	16.53	37.21	17.43	14.86	4.008	Ufl1 (+125)	1.05119	11.8432	0.105157	0.721209
chr3	122510102	122510190	20.36	3.562	9.064	27.49	10.61	12.86	27.34	13.5	28.47	53.73	17.87	9.349	2.834	Bcar3 (+90366), Fnbp1l (+109407)	1.03413	12.0098	11.6727	0.54966
chr12	51377467	51377631	20.16	4.143	2.049	27.34	8.851	11.16	38.2	4.264	19.23	42.91	14.15	11.09	4.017	Scfd1 (-31)	1.10366	11.5918	0.572192	0.644167
chr18	57354666	57354775	36.7	3.392	5.244	27.72	10.22	9.402	26.16	6.483	24.76	38.02	15.72	13.74	3.886	Prrc1 (-12)	0.904467	11.4258	0.413353	1.26213
chr13	38528013	38528102	22.38	1.651	3.599	24.14	9.152	6.773	37.09	11.3	9.742	44.84	22.8	11.89	3.798	Txndc5 (+432)	1.08239	12.1694	12.0691	0.651886
chr4	137593653	137594251	18.2	3.321	4.845	27.42	11.85	10.26	48.81	4.582	27.61	33.06	20.73	12.97	1.595	Usp48 (-255)	1.07292	11.5601	0.449704	0.55188
chr5	30960252	30960427	27.38	2.61	3.553	31.33	6.327	6.753	38.82	5.968	16.24	28.73	10.79	11.6	0	Preb (-10)	0.992783	11.7474	0.20219	1.08575
chr2	32966826	32966964	25.1	2.431	3.55	16.76	6.146	4.98	40.94	6.445	13.98	43.3	11.35	4.531	3.183	Lrsam1 (-5281), Slc2a8 (+15187)	1.13531	12.0048	11.7976	0.617326
chr2	169351758	169351857	32.84	2.795	4.219	24.74	5.789	6.986	34.59	2.796	20.64	33.67	15.87	19.89	2.313	Zfp64 (-396536), 1700101G07Rik (-230273)	1.02866	11.6818	0.243307	0.789275
chr4	147424036	147424099	29.56	34.81	12.69	26.11	22.67	27.03	37.31	29.58	34.29	31.98	30.49	26.76	12.15	Gm13152 (-68349), Gm13145 (+62757)	0.856728	10.2261	2.90504	0.413697
chr1	46704328	46704405	28.09	18.97	12.19	50.02	32.22	22.22	24.62	22.72	31.28	22.02	18.65	28.4	3.596	Dnahc7c (+95406), Slc39a10 (+149679)	0.812137	10.1152	2.71897	0.732709
chr8	42711669	42711733	19.97	17.54	51.72	41.2	42.39	26.57	38.97	31.11	14.46	24.25	23.98	21.77	7.451	Triml1 (+429785)	0.909799	12.9987	0.461	0.28211
chr5	92137744	92138003	22.19	2.141	5.602	29.38	7.715	9.407	45.57	5.065	14	27.16	10.77	8.415	2.789	Uso1 (-64)	1.04125	11.8648	11.8068	0.758311
chr1	13561679	13561792	26.56	4.637	0.2918	24.1	4.13	9.659	42.65	0.8654	13.91	29.85	17.02	8.236	1.235	Ncoa2 (-187653), Tram1 (+28128)	1.10168	11.856	1.49452	0.872488
chr6	134898310	134898437	27.84	4.126	4.006	22.88	7.838	6.659	41.39	6.16	9.214	30.53	12.56	6.637	0	Cdkn1b (-22027), Gpr19 (-10542)	1.05405	11.9891	0.0280475	0.790313
chr12	17266354	17266625	19.71	3.352	7.451	24.43	11.08	5.438	42.78	7.816	14.99	35.66	18.18	12.38	0.2315	Pdia6 (-55)	1.07672	11.9034	0.111796	0.532419
chr3	65392542	65392765	25.42	3.931	1.098	24.96	8.451	8.84	37.41	4.203	17.7	33	16.63	7.986	1.055	Ssr3 (-31)	1.05042	11.7243	0.337625	0.848658
chrY	90808297	90808390	11.39	21.92	22.12	41.4	21.5	10.11	32.42	19.68	17.25	33.78	18.06	14.02	16.39	Erdr1 (+23606)	0.989773	11.7022	1.23558	0.571808
chr8	3467602	3467868	19.85	2.9	3.282	27.49	4.603	4.387	33.92	5.577	25.78	36.83	17.11	16.3	2.241	1700019B03Rik (-3127), Pex11c (-55)	1.03066	11.5899	0.391591	0.844315
chr9	6448478	6448564	75.2	24.72	2.008	12.32	4.209	2.445	26.1	4.72	5.352	4.256	12.18	158.6	10.45	Ddi1 (-181974), Dync2h1 (+735925)	1.11173	11.1009	2.14889	0.113279
chr7	99858879	99858975	13.38	1.824	1.734	27.9	13.18	7.683	37	3.767	17.05	39.59	12.35	8.399	0.3676	Xrra1 (-291), Spcs2 (-44)	1.10882	11.5924	0.617559	0.68076
chr17	36231262	36231603	22.37	15.15	24.92	26.46	24.05	18.35	31.2	27.55	16.99	37.73	23.68	26	11.69	H2-T3 (-41146), Rpp21 (+26636)	0.851385	13.4534	10.7515	0.448944
chr15	4280483	4280578	103.1	12.42	3.702	7.198	3.474	8.73	3.235	6.215	9.025	4.109	6.829	4.253	1.94	Plcxd3 (-94973), Oxct1 (+254148)	0.905228	10.2812	10.1016	0.317096
chr9	27213181	27213267	25.56	38.52	50.78	34.09	61.76	39.39	32.81	32.18	37.58	24.73	31.12	26.64	14.81	Igsf9b (-86006), Jam3 (-57803)	0.803981	13.9311	2.71165	0.643218
chr10	127042114	127042198	28.3	0.379	1.944	16.93	7.394	5.043	41.78	2.724	5.479	30.15	9.556	8.619	15.31	Mettl21b (-643), Mettl1 (+224)	1.07214	11.9545	0.00775404	0.807324
chr7	43579499	43579572	17.38	4.394	2.689	19.96	10.26	2.049	52.97	3.589	15.34	26.53	12.73	8.641	0	Zfp719 (-74)	1.09844	11.5934	0.71444	0.479812
chr1	13589804	13590066	20.25	4.729	4.986	22.69	6.461	6.478	38.08	7.507	18.98	35.74	17.14	10.09	4.46	Tram1 (-71)	1.07731	11.8412	0.109399	0.607798
chr11	119053444	119053538	27.2	3.126	5.846	31.8	3.927	10.49	35.22	6.478	17.14	21.81	12.01	8.286	0	Cbx8 (-12522), Cbx4 (+32730)	0.977217	11.7193	0.0567691	1.0707
chrY	261350	261420	23.62	26.24	16.37	46.99	22.31	23.06	16.78	12.13	33.34	27.75	18.32	20.11	4.258	Zfy1 (+536024)	0.869264	10.0636	2.24282	0.758853
chr10	91082868	91082941	20.94	1.778	0.2581	26.51	4.351	6.715	32.07	5.813	7.46	35.07	10.98	8.641	0	Ikbip (-152), Apaf1 (-135)	1.03817	12.0298	0.07683	0.963155
chr10	93498204	93498305	18.88	26.79	23.91	34.02	19.62	14.61	40.7	26.87	15.82	20.65	22.83	25.96	6.034	Hal (+9487), Amdhd1 (+41778)	1.04543	10.9669	2.99744	0.190252
chr8	94386231	94386494	29.01	2.835	3.809	21.1	10.88	5.547	35.64	8.889	14.44	28.33	12.68	7.571	3.623	Herpud1 (-75)	1.00507	11.8919	0.328022	0.973958
chrX	128363670	128363734	11.07	12.32	10.8	22.18	128.6	22.4	68.18	64.23	75.46	12.14	39.94	454.7	9.559	4930412D23Rik (-627148)	1.04698	12.5391	3.67801	0.258616
chr5	123136587	123136651	22.88	4.764	7.09	14.91	10.45	10.46	42.12	5.766	12.81	33.59	11.72	9.256	3.578	Rhof (-3927)	1.14497	11.9681	11.6197	0.298672
chr6	87042655	87042863	21.13	5.351	7.194	23.82	5.511	8.879	36.6	7.505	14.94	31.77	14.94	12.12	1.595	Gfpt1 (-87)	1.05804	11.9793	11.8378	0.607592
chr4	147417262	147417330	29.36	17.97	24.66	23.81	21.29	18.21	32.98	14	19.4	26.91	20.55	31.94	14.95	Gm13152 (-75121), Gm13145 (+55985)	1.13015	12.4851	11.9403	0.143501
chr9	118506197	118506283	24.35	3.73	5.094	25.36	6.912	6.148	36.84	7.745	14.66	26.49	10.46	3.827	6.293	Golga4 (-78)	1.02202	11.8977	0.0251316	0.890896
chr5	100416152	100416353	17.55	4.751	5.437	26.31	7.636	8.171	33.52	7.518	14.39	35.45	14.61	15.32	4.542	Sec31a (-19)	1.02932	11.8521	0.224031	0.772848
chr13	73603896	73604063	22.69	5.411	5.341	24.71	6.099	8.425	34.01	4.464	14.79	31.11	13.67	11.73	0	Clptm1l (-22)	1.05177	11.8078	0.157809	0.765097
chr3	123267376	123267602	17.29	5.732	5.1	24.34	10.25	8.637	27.37	6.825	12.74	42.95	16.13	15.11	1.923	Sec24d (-7)	1.0829	11.8466	0.298349	0.521973
chr5	76974956	76975082	28.39	5.442	8.574	27.81	18.7	5.877	29.91	10.02	15.49	25.79	25.77	13.99	2.764	Srp72 (+336)	0.942552	12.0361	0.35459	0.801444
chr5	65492763	65493051	20.94	3.018	5.278	18.06	5.977	5.358	40.2	6.022	8.419	32.36	15.69	8.374	2.541	Smim14 (+144)	1.09549	12.252	0.21006	0.533158
chr13	119610638	119610723	30.8	19.26	23.31	21.41	19.5	21.68	31.02	28.59	28.05	28.32	21.66	20.31	11.17	Ccl28 (-13138), Gm21967 (+4031)	0.862913	12.123	10.7334	0.252282
chr6	88518602	88519002	22.8	3.551	3.768	20.71	9.875	7.035	35.29	6.596	11.77	32.16	18.63	11.02	4.098	Sec61a1 (+103)	1.06072	11.9666	0.146691	0.654507
chr4	146173981	146174081	23.84	19.48	24.24	26.65	20.16	33.12	29.37	22.9	24.75	30.91	30.39	31.74	19.29	Gm13251 (-274992), Zfp600 (+17207)	0.95137	11.6457	10.0719	0.158437
chr11	120572888	120573010	20.44	3.593	1.441	23.42	11.84	3.399	45.73	4.446	23.86	20.45	17.73	15.95	3.6	P4hb (+304)	1.02419	11.3726	0.87006	0.768244
chr11	116853185	116853261	19.51	4.414	6.797	22.53	9.293	8.769	44.23	13.72	27.38	23.61	18.2	10.78	3.096	Mfsd11 (-597), Srsf2 (-129)	1.0405	11.6972	0.0501157	0.500955
chr8	84847035	84847161	14.91	4.402	3.066	27.85	7.112	13.48	30.66	4.54	21.06	35.13	15.47	8.126	1.089	Calr (-164)	1.03415	11.2671	0.935644	0.881224
chr17	34122590	34122793	19.87	3.691	5.066	21.88	9.58	7.821	36.54	5.963	21.19	29.91	10.99	7.196	1.005	Brd2 (-945)	1.06046	11.6678	0.32441	0.678886
chr19	6046504	6046575	20.78	2.707	2.101	12.95	8.023	9.554	39.96	9.641	14.97	34.48	15.32	7.88	0	Syvn1 (-36)	1.14014	11.9903	11.7222	0.362281
chrX	13041691	13041804	17.74	2.46	5.002	27.2	6.69	1.94	32.75	3.07	10.76	29.09	12.15	5.048	0	Med14 (-279675), Usp9x (-29766)	1.0083	11.9319	0.106911	1.24227
chr8	25720008	25720102	25.39	2.553	8.386	22.1	11.89	7.437	31.98	6.595	19.62	27.1	22.15	15.37	6.208	Ppapdc1b (-9)	0.988352	11.8735	0.103481	0.734966
chr1	183439156	183439239	26.14	6.078	6.054	24.09	11.18	3.961	28.55	2.423	24.66	27.56	14.6	5.375	3.203	Hhipl2 (+20695), Gm8214 (+242996)	0.980026	11.3735	0.820292	0.986009
chr4	43562517	43562604	15.04	0.197	1.39	19.87	3.1	3.098	31.83	0.06363	22.19	39.6	12.78	7.818	2.362	Tln1 (-139), Creb3 (+229)	1.09364	11.6095	0.272946	0.755981
chr14	20674008	20674105	13.36	4.317	2.38	24.07	7.555	9.527	40.24	3.747	28.7	28.51	27.83	18.4	7.512	Sec24c (-264)	1.05985	11.3586	0.800551	0.514885
chr6	118479242	118479344	23.74	0.6482	5.08	15.57	3.897	3.107	31.01	4.414	10.84	35.67	9.911	11.51	0.8304	Zfp9 (+27)	1.08754	12.0008	11.9001	0.709224
chr6	47813466	47813692	16.08	3.099	2.904	22.1	7.726	9.253	33.62	4.997	25.5	34.19	12.27	7.378	3.214	Pdia4 (-67)	1.03928	11.4326	0.757645	0.78857
chr2	20899857	20900231	23.98	19.84	19.99	31.55	18.55	23.5	25.26	21.8	29.29	25.18	27.65	24.52	14.08	Arhgap21 (+67677), Etl4 (+610131)	0.850893	10.432	1.16506	0.437003
chr11	104072968	104073094	25.04	13.8	20.04	25.9	19.66	16.88	17.97	13.82	26.63	36.82	26.42	24.17	15.5	Crhr1 (-59824), Arf2 (+106160)	0.958534	10.846	0.464573	0.340244
chr2	157278923	157279071	14.42	4.517	5.963	23.08	10.97	11.18	36.12	6.134	14.54	32.04	26.84	7.425	2.12	Rpn2 (-62), Mroh8 (+552)	1.10351	12.0337	0.338745	0.354018
chr14	122104938	122105045	23.51	5.172	1.673	18.6	7.43	11.36	28.92	2.587	18.01	34.49	15.5	6.356	4.442	Tm9sf2 (-2046)	1.12369	11.6404	0.395863	0.485217
chr16	11176315	11176497	13.53	5.025	7.653	29.43	11.37	9.863	32.91	7.756	20.04	29.62	14.83	14.38	1.133	Zc3h7a (-13)	1.0017	11.6781	0.322109	0.866234
chr1	85331462	85331571	25.39	15.02	20.43	26.9	13.72	20.79	15.67	9.767	24.59	37.23	27.34	25.58	13.1	C130026I21Rik (-60974), Sp110 (+267300)	0.993063	11.4209	11.0097	0.318356
chr8	14996029	14996105	18.58	2.851	6.529	23.02	6.094	11.21	37.62	9.468	25.01	25.97	14.08	12.56	1.971	Kbtbd11 (-14958), Arhgef10 (+84404)	1.04192	11.6867	11.5335	0.58647
chr2	144270580	144270658	23.33	3.83	4.147	27.46	11.65	3.911	29.39	7.901	13.76	24.33	8.782	5.157	5.832	Mgme1 (-281), Snx5 (+287)	0.978888	11.8354	0.409655	1.15741
chr11	59228139	59228394	18.05	5.315	4.353	18.6	7.495	8.369	31.73	7.106	15.29	35.99	15.18	9.708	4.183	Arf1 (-105)	1.12727	11.8738	0.0925406	0.452267
chr5	100038958	100039050	21.63	6.388	11.03	25.68	12.69	16.58	23.68	10.55	12.61	33.33	20.4	14.55	1.415	Enoph1 (-990), Hnrpdl (+218)	1.00429	12.3924	11.39	0.49973
chrY	15046591	15046672	20.21	21.25	20.61	28.19	18.03	20.28	27.58	18.61	13.99	28.24	20.92	21.85	0	Gm20822 (+836613)	1.1221	12.791	11.2164	0.15215
chr6	117879642	117879771	23.26	2.809	1.181	22.49	7.222	4.03	34.26	3.032	13.82	23.99	12.34	10.62	2.237	Hnrnpf (-27075), Zfp239 (+16630)	1.01021	11.6895	0.443286	1.03051
chr14	118937621	118937972	17.02	4.789	5.565	26.3	7.816	8.713	30.13	9.951	17.47	30.3	16.01	10.35	2.147	Dnajc3 (-135)	1.009	11.6895	0.267842	0.795806
chr15	26549455	26549549	96.49	9.873	6.214	2.122	6.739	3.687	2.701	6.909	5.207	1.967	6.115	3.501	0.4756	March11 (+240438), Fbxl7 (+345547)	1.03548	12.5251	3.47309	0.136807
chr15	88819379	88819676	19.43	3.368	1.909	22.94	7.199	6.313	35.23	5.461	12.22	25.25	11.78	6.649	1.986	Alg12 (-210), Creld2 (-118)	1.0391	11.7801	0.33056	0.813231
chr12	69183729	69183854	15.92	3.928	2.826	19.14	13.12	9.147	29.05	6.908	12.68	38.72	19.13	16.37	0.7529	Mgat2 (-366), Rpl36al (+221)	1.10586	11.8027	0.43304	0.341197
chr13	99353225	99353354	22.04	2.724	0.8399	12.88	7.896	6.119	34.08	13.24	17.54	33.79	18.48	7.795	1.52	Mrps27 (+8504), Map1b (+163312)	1.07824	12.0485	0.124277	0.671869
chr5	15607948	15608091	27.42	18.51	23.4	32.58	26.33	50.22	22.11	24.63	41.96	20.53	18.8	20.06	17.03	Gm10354 (-629085), Speer4d (-11044)	0.99206	11.1915	10.195	0.259895
chr17	56276739	56276952	16.8	2.374	2.374	22.7	5.407	5.757	29.61	2.893	19.73	33.09	14.01	10.11	1.307	Ticam1 (-60)	1.06039	11.6153	0.339348	0.765111
chr12	85375007	85375134	16.6	6.122	2.003	30.66	8.747	12.4	31.66	7.7	17.73	23.06	15.87	21.06	0.9387	Tmed10 (-354)	0.933066	11.2911	0.932747	1.07993
chr10	77622097	77622354	16.26	3.492	4.216	20.62	8.251	6.789	24.43	7.187	12.6	40.27	10.8	7.975	3.516	Ube2g2 (-49)	1.08955	11.9453	0.0647808	0.578629
chr5	14989200	14989283	18.95	11.83	10.65	28.63	16.14	41.54	22.24	11.25	27.45	31.66	23.6	15.9	7.56	Speer4d (-629822), Gm10354 (-10307)	1.04941	10.5311	0.576305	0.22013
chr13	55362762	55362963	15.28	2.187	1.961	19.44	6.551	4.362	30.22	6.059	11.22	36.07	9.819	9.124	3.613	Lman2 (-80)	1.09182	11.8507	0.323822	0.716616
chr11	119215415	119215602	19.09	2.357	1.965	25.31	5.542	10.65	22.76	3.187	22.35	33.42	11.9	7.939	1.569	Cbx4 (-129288), Tbc1d16 (+12990)	0.975827	11.5048	0.253497	0.883894
chr4	147634861	147634924	24.29	17.57	15.6	19.67	16.25	22.78	36.8	23.61	24.72	19.8	17.36	20.84	12.39	2610305D13Rik (+7620), Gm13154 (+81554)	1.00806	11.6137	11.2865	0.116515
chr18	35498838	35499036	16.79	4.329	2.458	24.41	12.3	10.07	29.35	3.15	18.3	29.79	13.75	13.74	0.8794	Sil1 (-12)	1.07135	11.4451	0.748434	0.629044
chr8	70302455	70302607	23.99	5.22	4.556	21.07	5.849	3.897	23.65	1.517	17.16	31.47	10.53	9.262	1.873	Ddx49 (-42), Cope (+13)	1.07392	11.4278	11.3922	0.782608
chr6	87887868	87887966	15.87	2.599	1.923	20.75	7.315	2.66	20.75	1.845	14.78	42.65	16.2	4.067	0	Copg1 (+103)	1.04727	11.6784	0.497133	0.742427
chr6	88084406	88084534	20.2	4.553	6.968	23.59	9.538	7.845	30.87	4.555	16.03	25.33	18.13	14.57	0.2574	Rpn1 (-3)	1.03049	11.8102	0.156479	0.671553
chr5	143403729	143403867	23.2	5.314	6.52	23.11	9.104	4.057	31.27	2.848	12.61	22.34	15.56	6.558	3.325	Kdelr2 (-22)	1.02847	11.9084	0.219494	0.844392
chr3	52601208	52601276	25.75	2.701	7.343	17.52	14.3	8.843	18.11	8.954	24.5	37.84	11.58	2.743	0	Foxo1 (+332905), Cog6 (+415981)	0.946877	12.0818	11.5022	0.660485
chr19	57197434	57197502	20	9.363	4.849	19.88	9.864	11.11	29.87	5.427	11.06	29	10.21	14.14	4.475	Afap1l2 (-189258), Ablim1 (+18564)	1.0754	11.7286	0.482934	0.429108
chr9	44326485	44326567	15.88	2.747	1.608	17.42	8.202	1.806	38.79	2.408	19.98	26.3	10.12	5.931	1.769	Dpagt1 (-319)	1.09058	11.5022	0.68095	0.658945
chr2	36071738	36071826	19.82	4.09	2.534	24.08	3.912	1.178	19.6	2.977	19.89	34.8	12.79	2.867	0	Morn5 (+22324), Lhx6 (+33489)	0.973951	11.538	0.547518	1.08879
chr17	35916530	35916959	20.06	3.391	2.544	18.64	9.191	6.045	34.07	3.854	12.56	25.47	14.28	8.404	2.267	Mrps18b (-356), Ppp1r10 (+179)	1.06288	11.7866	0.324991	0.681203
chr4	124851097	124851242	19.62	3.85	3.877	25.37	10.83	2.37	33.26	4.327	13.5	19.98	15.38	8.246	3.256	1110065P20Rik (-440), Yrdc (+491)	0.862824	11.6895	0.748768	2.08538
chr4	147718440	147718546	24.71	14.88	14.96	24.78	20.22	22.27	31.81	13.51	17.71	16.91	29.49	26.87	16.2	Zfp534 (-15940), Gm13157 (+91295)	0.961238	11.1128	10.4699	0.225779
chr6	142068037	142068098	25.22	23.28	13.87	18.13	24.9	20.71	24.45	17.76	23.43	30.34	32.65	25.57	8.023	Gm6614 (-56654), Slco1a6 (+118085)	1.04252	10.3614	2.48489	0.0716759
chr6	113076367	113076504	20.63	8.088	4.458	21.84	9.986	4.454	19.94	10.4	11.07	35.36	14.15	7.26	1.546	Setd5 (-929)	1.00478	11.7541	0.635458	0.79821
chr8	19909035	19909164	21.41	20.03	25.51	30.78	22.94	21.85	27.62	15.86	16.42	17.44	16.6	20.75	18.62	Gm21811 (-227355), Gm6483 (+226830)	1.00673	12.0553	11.2401	0.159488
chr9	21926353	21926428	28.02	2.334	4.229	18.53	5.868	5.727	20.14	4.182	15.15	30.28	6.679	11.95	4.392	Ccdc159 (-1080)	1.03963	11.1391	0.898929	0.964747
chr10	58238498	58238559	30.92	26.03	19.92	18.47	21.82	19.37	18.93	34.45	25.13	28.56	32.7	18.46	17.24	Gm4981 (-1869)	1.14087	11.324	2.57153	0.0331174
chr17	34850244	34850344	17.29	5.999	6.563	34.32	8.482	5.924	21.74	4.76	15.62	22.86	19.67	8.41	3.953	Nelfe (-97), Skiv2l (-84)	0.909872	11.6008	0.741829	1.28023
chr4	59003094	59003181	15.09	6.994	4.025	20.9	5.507	7.746	33.18	10.1	9.892	27.03	9.695	12.9	3.831	Gm20503 (-72), Dnajc25 (-34)	1.0785	11.9891	0.255667	0.507216
chr4	147122382	147122511	20.27	16.61	15.98	21.52	21	17.81	26.59	24.19	19.27	27.68	15.88	25.04	16.04	Gm13139 (-9591), Rex2 (+100597)	1.12932	12.031	0.536859	0.117802
chr11	116853319	116853482	15.85	4.589	1.368	25.8	5.802	9.622	34.43	2.932	13.98	19.33	19.93	12.89	2.94	Mfsd11 (-419), Srsf2 (-307)	1.09773	11.4427	0.743857	0.913115
chr1	93445604	93445831	12.32	5.232	8.577	19.75	6.668	14.01	30.15	4.698	12.44	32.6	20.78	8.167	5.469	Gm17415 (+24036), Hdlbp (+33090)	1.12529	11.6166	10.6716	0.364484
chr14	55153272	55153364	19.95	2.156	1.365	24.38	6.866	6.439	21.12	4.372	14.09	28.99	7.183	7.472	2.83	Dhrs2 (-68689), Jph4 (-36383)	0.989991	11.8063	0.232486	0.983984
chr19	41263999	41264134	13.82	3.628	5.164	17.81	6.769	9.16	31.43	8.242	10.85	31.32	13.7	14.29	8.186	Tm9sf3 (-63)	1.09717	12.077	11.8551	0.370013
chr17	87265909	87266061	23.62	2.924	4.483	21.48	5.207	6.889	28.25	4.152	10.67	20.84	9.857	9.972	0.9959	Mcfd2 (-81)	0.992171	11.8732	11.8585	1.00989
chr15	57892224	57892601	15.01	2.66	3.157	20.38	4.905	6.199	34.25	3.632	18.14	23.84	12.75	7.735	3.16	Derl1 (+5)	1.06402	11.6505	0.246156	0.645777
chr15	82127790	82127909	10.64	2.552	4.46	14.18	6.487	1.842	37.1	2.31	9.479	31.37	11.21	3.027	7.145	Ccdc134 (-72)	1.1584	11.8599	0.251555	0.344131
chr8	70302712	70302787	20.11	2.318	1.151	21.14	0.1893	2.923	33.62	5.683	10.61	18.2	9.455	7.216	0.5438	Ddx49 (-261), Cope (+232)	1.00044	11.9392	0.121125	1.0757
chr19	5842990	5843114	20.21	13.57	16.92	28.26	21.41	26.32	16.13	16.49	35.84	28.46	15.65	27.9	19.39	Scyl1 (-71651), Frmd8 (+32222)	1.05514	11.1582	10.8749	0.141676
chr9	115310908	115310989	24.47	2.645	1.551	16.85	9.442	11.76	21.27	6.242	17.23	30.27	10.51	7.945	3.738	Stt3b (-528)	1.12931	12.6163	10.7204	0.311944
chr19	61266627	61266721	23.16	8.649	16.32	23.84	17.05	16.7	23.69	18.02	33	22.07	16.73	17.02	9.57	Csf2ra (-38256), Gm21060 (+30395)	1.18595	10.5308	0.735374	0.162114
chr4	91065809	91065879	19.3	15.85	18.35	29.31	17.77	23.84	28.44	21.35	20.77	15.69	21.08	29.12	10.2	Elavl2 (+334140), Zfp352 (+847024)	0.941538	11.6006	11.4292	0.22454
chr11	120319867	120319951	11	33.54	30.08	35.61	17.64	21.23	24.2	17.33	15.45	21.72	26.15	28.4	17.43	Actg1 (+28633), Bahcc1 (+86962)	0.82957	13.4446	10.4644	0.647674
chr1	84279129	84279193	23.62	2.85	6.722	20.58	4.63	9.233	22.6	5.968	15.4	25.62	10.02	12.83	0	Sphkap (-870961), Pid1 (+5484)	0.987137	11.5976	0.161122	0.786113
chr16	4643710	4643854	21.74	3.69	0.6979	20.88	1.282	5.574	23.38	4.254	10.69	26.22	13.6	11.48	0.1634	Vasn (+3841), Coro7 (+35995)	0.962784	11.66	0.435422	1.21676
chr17	56170749	56170822	24.93	6.29	4.173	16.25	5.931	4.403	12.95	7.937	13.3	37.76	13.66	10.14	5.168	Tnfaip8l1 (+8309), D17Wsu104e (+13134)	0.959979	10.2673	1.12185	1.37154
chr18	35814776	35815015	20.42	5.046	3.068	19.84	7.766	5.707	25.23	2.918	16.47	26.28	12.3	8.3	2.54	Cxxc5 (-14922), Ube2d2a (+43337)	1.02067	11.3495	0.935239	0.874096
chr16	35490771	35490993	16.59	4.379	3.169	21.29	6.019	5.764	27.4	2.444	19.33	25.99	13.85	12.02	3.77	Pdia5 (-9)	1.04352	11.5088	0.557694	0.753171
chr6	77475498	77475621	20.33	1.742	3.74	21.36	5.828	6.562	23.72	1.71	26.93	25.8	9.961	10.64	3.201	Lrrtm1 (+232863), Ctnna2 (+503990)	1.00681	11.1466	0.678308	0.967409
chr5	14940527	14940597	20.24	8.745	8.457	33.06	7.199	58.9	18.1	7.539	24.13	19.8	5.583	14.76	10.15	Speer4e (-2133)	0.945792	11.6487	10.0268	0.904212
chr11	51756439	51756656	20.43	5.501	7.453	22.86	8.038	6.013	18.85	8.562	21.25	28.56	14.14	12.43	3.542	Sec24a (+70)	0.937653	11.5261	0.424989	0.820858
chr5	53196528	53196692	19.74	2.449	2.566	17.18	7.228	12.84	26.49	4.208	21.96	27.19	9.182	7.692	5.299	Sel1l3 (+16842), Slc34a2 (+147257)	1.1627	11.3466	0.657155	0.349325
chr14	46822207	46822285	20.93	8.147	7.469	16.64	4.8	10.67	23.85	4.163	24.77	28.9	13.33	14.37	6.214	Gmfb (-4)	1.17696	11.3254	11.311	0.308647
chr2	105224257	105224359	19.74	1.608	3.371	14.74	4.662	7.362	31.57	5.156	14.79	24.19	10.44	8.98	1.499	0610012H03Rik (-12)	1.06543	11.912	11.6475	0.695922
chr8	49816775	49816858	16.31	15.99	14.59	44.41	8.766	15.22	15.38	11.63	30.23	14.13	16.34	16.94	3.487	4930555F03Rik (+445904)	0.875633	10.1255	1.68223	1.24897
chr2	158397230	158397460	20.33	2.236	3.96	23.31	5.323	6.697	19.81	7.701	13.53	26.71	17.06	15.34	3.581	Ralgapb (-12508), Snhg11 (+21707)	0.930769	11.9071	0.0594208	1.01765
chr3	123267828	123267921	16.67	2.449	1.266	24.65	4.102	5.016	17.13	0.6746	14.29	31.27	9.231	3.185	5.313	Sec24d (+379)	0.980479	11.645	0.405884	1.12032
chr7	80883498	80883584	22.19	3.047	2.264	17.35	8.253	6.2	28.2	7.08	12.59	21.89	8.667	8.164	8.208	Wdr73 (+17728), Zscan2 (+21433)	0.999929	11.7914	0.378077	0.969956
chrY	142867	142940	33.1	17.02	8.991	25.44	24.11	34.92	14.29	18.48	28.44	16.65	16.53	16.15	3.503	Zfy1 (+654505)	0.951156	10.1027	0.897459	0.27948
chr2	90395128	90395215	16.05	18.42	20.54	27.58	20.07	10.15	21.87	28.84	12.85	23.96	21.9	22.36	13.98	Gm13769 (+72950), Ptprj (+185475)	0.948262	11.4907	1.40087	0.367741
chr7	66079520	66079740	18.03	3.061	2.498	19.07	5.243	7.338	26.75	3.271	17.24	25.55	15.23	6.233	5.027	Vimp (-19)	1.05787	11.6218	0.437079	0.752199
chr1	191120941	191121023	18.3	8.227	16.89	28	13.89	16.58	21.59	23.94	25.65	21.18	22.01	28.25	18.65	Batf3 (+22568), Fam71a (+43835)	0.808542	10.764	0.708594	0.461786
chr1	36244120	36244356	16.26	3.569	2.528	21.28	8.075	6.589	25.82	3.174	13.36	25.35	13.96	9.622	1.329	Uggt1 (+67)	1.03766	11.6589	0.505244	0.770471
chr6	86472222	86472480	15.54	5.182	3.335	25.67	9.753	9.518	22.86	5.035	16.19	24.58	8.538	7.398	4.846	C87436 (+33977), Pcbp1 (+53820)	1.09761	10.4236	3.192	1.76854
chr10	62651445	62651623	16.65	3.384	4.146	18.07	9.002	5.991	33.99	4.032	13.1	19.2	12.58	6.43	6.504	Ddx50 (-316)	1.05971	11.7415	0.284243	0.586609
chr11	50325772	50325971	13.49	4.596	6.304	21.89	9.176	10.1	28.68	8.604	22.85	23.85	17.86	10.94	0.9853	Canx (-199)	0.983391	11.4136	0.676059	0.617988
chr4	40829056	40829121	23.54	2.279	4.735	14.45	7.398	7.998	21.81	3.264	19.35	28.01	7.219	15.05	2.075	Smu1 (-71166), B4galt1 (+24916)	1.18518	11.0475	1.47609	0.325184
chr4	138304700	138304857	10.11	2.527	7.431	19.3	8.375	12.11	26.89	4.948	16.26	31.39	8.976	11.2	1.848	Ddost (+49)	1.15194	11.8682	11.5659	0.370148
chr11	86807607	86807793	17.8	3.871	3.36	15.1	11.7	9.125	34.45	3.065	11.55	20.33	17.27	10.3	0.9699	Dhx40 (-4)	1.08316	11.7824	0.414702	0.373342
chr5	124579071	124579150	17.38	6.261	8.487	27.44	4.223	12.11	23.59	8.782	12.37	18.75	9.989	8.702	5.48	Gtf2h3 (-29), Eif2b1 (+20)	0.866961	12.1376	11.3332	1.52556
chr14	26637924	26638282	15.95	2.538	3.658	14.84	8.099	6.809	28.9	4.082	13.66	27.17	10.66	9.928	1.008	Arf4 (+29), 4930570N19Rik (+80)	1.11308	11.809	0.0893407	0.510669
chr6	94283877	94283968	11.52	3.189	3.658	24.72	6.103	12.94	21.17	8.982	16.26	29.24	12.07	5.746	0	Magi1 (-601)	0.938165	12.1719	11.3805	1.19195
chr9	21835363	21835434	16.63	4.38	3.627	15.23	11.37	5.945	28.54	3.768	24.86	26.07	7.077	12.33	2.044	Gm6484 (-111)	1.06692	10.4573	2.58087	0.628379
chr5	139252287	139252441	21.88	6.201	7.046	17.51	9.575	12.02	24.91	5.739	17.82	22.13	15.1	11.44	6.376	Get4 (+40)	1.05926	11.7291	0.102649	0.419024
chr6	128424616	128424986	15.48	2.872	2.054	15.29	3.232	2.946	32.91	3.042	11.41	22.48	6.06	6.295	2.756	Itfg2 (+130)	1.0861	11.7442	0.188628	0.675649
chr17	56584561	56584625	10.97	2.085	6.207	16.59	2.606	5.6	26.6	3.431	19.63	31.98	8.275	5.999	0.1103	Safb (-466), Safb2 (-8)	1.13821	11.8383	11.3878	0.479057
chr10	10449248	10449313	12.84	4.784	2.826	17.87	13.81	6.881	19.99	3.463	20.5	35.43	6.546	8.382	3.487	Adgb (-19442), Rab32 (+108952)	1.11433	11.2234	0.92807	0.24791
chr2	75659658	75659730	11.33	2.415	3.969	12.91	2.366	14.73	28.01	5.74	13.87	33.87	12.7	9.396	3.42	Hnrnpa3 (+433)	1.14903	12.6438	10.8232	0.299206
chr6	4086816	4086980	22.16	2.643	2.815	18.13	7.444	5.256	28.88	3.015	11.8	16.88	7.01	6.154	1.865	Bet1 (+74)	1.0035	11.709	0.300174	1.04361
chr2	91710716	91710931	17.98	2.625	5.127	23.08	6.652	12.54	25.09	6.66	13.42	19.8	10.47	10.26	6.873	Atg13 (-248), Harbi1 (-98)	0.979663	11.6457	0.252694	0.864695
chr12	25098787	25098876	12.93	8.24	7.075	25.65	11.05	9.186	21.78	7.215	14.95	25.39	8.646	7.313	0	Id2 (-2740)	1.09753	11.7263	1.18602	0.316695
chr1	170867749	170867878	15.95	2.857	3.396	19.73	5.64	9.69	21.97	3.948	14.15	27.65	14.27	5.031	3.502	Atf6 (-43)	0.989414	11.7337	11.5721	0.744671
chr11	80209011	80209083	21.39	6.173	12.34	29.64	5.003	15.16	21.34	5.484	29.24	12.84	11.3	11.58	0	Rhot1 (-8)	0.994832	10.9442	0.366205	0.831287
chr10	79766906	79767021	18.88	7.123	8.424	16.78	9.351	8.976	19.29	8.199	20.04	30.22	10.05	9.635	0.02728	Rnf126 (-12)	1.05875	11.2375	0.635492	0.432899
chr9	78521039	78521121	27.26	4.733	2.183	13.68	5.042	6.574	29.43	3.645	8.084	14.76	6.569	7.001	0.009565	Eef1a1 (-39356), Slc17a5 (+66961)	1.00477	11.8443	0.0667791	1.06089
chr3	95855817	95855946	15.69	3.36	3.469	18.86	4.636	4.489	25.2	5.45	18.12	25.31	10.53	6.293	1.921	Prpf3 (+3)	1.0347	11.6382	0.295097	0.772138
chr13	12565643	12565734	14.5	5.059	5.194	18.26	0.858	5.11	28.18	7.441	9.653	23.95	16.33	4.239	1.37	Ero1lb (-194)	1.08071	11.1278	11.0926	0.54427
chr3	123267946	123268120	17.5	3.532	5.09	16.67	7.139	5.567	22.99	3.839	8.402	27.52	6.746	3.236	7.338	Sec24d (+537)	1.12646	11.8422	0.350392	0.535116
chr11	94629616	94629800	21.61	2.888	8.465	16.65	4.089	4.878	22.52	5.656	10.41	23.89	11.51	9.798	0	Lrrc59 (-59)	1.01484	12.1658	11.6278	0.750967
chr5	115158783	115158874	16.63	0.6458	3.123	19.36	5.206	7.958	27.26	5.292	13.54	21.12	9.418	5.385	5.137	Mlec (-653)	1.01612	11.8343	11.7839	0.896697
chr6	108659415	108659542	19.08	5.389	4.402	18.02	8.747	9.528	19.81	3.589	16.04	27.44	14.58	8.623	7.263	Bhlhe40 (-1150)	1.00324	11.4427	0.303376	0.65851
chr16	39052745	39052809	24.38	15.63	12.12	19.18	20.21	13.49	22.88	21.62	18.36	17.89	19.12	20.28	0.6985	Igsf11 (+150461)	0.854263	12.3912	1.26329	0.440341
chr6	108659762	108659855	10.02	7.978	4.289	19.47	7.346	7.644	23.77	5.535	22.6	30.92	11.37	3.952	8.56	Bhlhe40 (-820)	1.08987	11.0529	0.926113	0.420369
chr4	46489246	46489325	19.37	7.036	5.625	12.21	1.909	5.324	25.85	6.376	10.38	26.74	13.56	7.036	2.184	Nans (+38)	1.09442	12.166	11.7194	0.501091
chr19	10689089	10689235	14.35	1.476	1.344	15.96	6.976	7.598	34.85	7.987	9.202	18.71	7.203	7.501	1.193	Vps37c (+347)	1.05238	11.8678	0.115815	0.527436
chr12	44210028	44210339	14.61	2.5	1.969	14.68	6.932	7.586	29.18	4.515	9.573	25.28	9.431	9.924	1.501	Dnajb9 (-116)	1.10356	11.8409	0.153343	0.475046
chr19	4070449	4070513	20.96	6.371	5.643	15.24	15.53	16.78	16.91	8.591	13.27	30.52	13.32	12.23	9.473	Cabp2 (-13038), BC021614 (-11186)	1.17211	12.1536	10.7682	0.189292
chr4	135964514	135964595	16.93	5.366	3.528	18.96	10.95	3.949	22.84	8.451	15.55	24.74	13.8	8.803	0.4648	Gale (-610)	0.992473	11.6296	0.827202	0.742767
chr3	89281341	89281406	21.87	8.081	1.884	19.86	7.125	8.043	22.05	7.778	16.08	19.62	9.03	15.7	3.656	Efna1 (-1729)	0.912768	11.1816	1.18435	1.10632
chrX	74270342	74270731	10.24	2.864	3.512	18.21	10.1	10.09	29.66	6.403	29.86	25.13	25.32	22.8	0	Rpl10 (-323)	1.04074	11.2737	0.804685	0.532229
chr12	55491939	55492099	20.15	8.081	6.222	22.98	6.122	12.62	18.58	13.05	10.4	21.48	9.836	10.23	4.24	Nfkbia (+628)	0.913786	12.0878	11.8017	0.845703
chr4	82774606	82774667	26.04	13.33	16.4	19.19	7.971	36.3	27.35	20.48	16.74	10.59	17.19	13.64	3.292	Nfib (-269329), Zdhhc21 (+85036)	0.915789	10.4492	10.3328	0.422023
chr15	101977373	101977528	16.7	3.333	4.488	20.25	6.983	6.488	27.51	8.726	15.11	18.52	11.86	8.8	0.1569	Krt78 (-23164), Krt8 (+26891)	0.993454	11.7789	0.160109	0.741506
chr5	64970025	64970118	20.89	4.489	9.607	19.54	10.13	5.287	19.6	7.321	15.6	22.93	9.978	7.53	2.91	Fam114a1 (+1)	0.977705	11.7405	0.288389	0.715603
chr13	81657587	81657845	16.04	3.801	3.317	20.06	4.56	8.111	27.65	5.206	12.06	18.93	11.98	8.142	2.216	Lysmd3 (-90)	1.02632	11.7465	0.268117	0.712567
chr2	39065485	39065752	14.13	3.517	3.846	21.1	4.054	4.31	20.13	4.457	6.823	27.12	8.866	8.957	3.422	Golga1 (-78)	1.03298	11.9826	0.0576266	0.860332
chr9	100643409	100643565	23.62	5.855	5.838	24.49	4.607	11.44	22.98	9.332	12.97	11.26	13.49	5.942	4.706	Stag1 (+39)	0.920255	11.4436	0.556662	1.06173
chr1	63630489	63630629	19.66	20.5	16.55	23.49	28.25	14.67	21.03	22.18	8.416	18.05	24.98	12	12.77	Dytn (+56368), Adam23 (+184655)	1.05794	12.0693	2.32247	0.24179
chr6	90514533	90514605	17.12	1.36	6.085	12.65	2.884	4.402	32.71	3.639	28.59	19.74	12.41	5.231	6.089	Aldh1l1 (-36220), Klf15 (+49265)	1.08209	11.6484	11.3134	0.64911
chr8	71148850	71148920	17.99	16.62	19.96	24.42	13.69	9.521	18.64	4.481	7.64	21.08	25.87	10.97	16.13	Myo9b (-123829), Gm17576 (-105845)	1.07282	12.6733	10.3782	0.154828
chr6	108828301	108828708	15.26	4.464	7.357	18.67	7.7	4.971	26.85	5.535	12.27	21.35	12.64	8.171	1.091	Edem1 (-136)	1.04755	12.2068	11.7598	0.598258
chr11	116853638	116853745	12.89	4.669	1.101	17.32	8.574	8.554	29.4	6.794	8.346	22.51	13.95	8.27	2.741	Srsf2 (-598), Mfsd11 (-128)	1.07381	11.8986	0.776152	0.424921
chr2	80315556	80315683	23.93	3.741	3.388	15.56	4.01	3.522	23.79	5.056	11.05	18.79	11.98	9.055	9.721	Dnajc10 (+154)	0.970774	11.8931	0.161697	1.00925
chr5	33936256	33936347	19.64	2.637	3.727	13.55	13.26	8.984	26.35	6.286	11.63	22.41	9.136	4.561	4.146	Nelfa (+111)	1.1026	11.9512	0.223214	0.60202
chr6	37442437	37442508	19.14	0.7933	1.238	13.63	6.773	3.087	27.87	3.95	28.42	21.31	9.775	15.4	2.198	Creb3l2 (-327)	0.988083	10.8494	1.4322	1.01423
chr14	122106940	122107107	12.92	4.04	8.171	16.55	4.76	8.381	27.09	4.32	8.628	25.24	11.99	9.142	0.3945	Tm9sf2 (-14)	1.15834	12.3983	11.8228	0.433139
chr8	54529493	54529593	22.53	3.232	1.303	13.53	5.252	4.102	31.3	3.561	5.138	14.38	8.329	8.246	2.737	Spcs3 (+455)	1.00946	11.9025	0.35979	0.825724
chr17	35916365	35916479	14.39	2.9	4.697	16.57	10.66	11.37	27.85	4.694	21.91	22.87	8.497	7.394	2.03	Ppp1r10 (-144), Mrps18b (-33)	1.12009	11.6334	0.16311	0.564355
chr3	22076687	22076774	15.76	5.137	9.529	23.65	14.44	6.026	21.72	9.798	14.06	20.46	11.76	10.47	0.1623	Tbl1xr1 (+79)	0.897603	11.7836	0.728524	1.1531
chr4	95161373	95161516	18.89	6.944	3.437	18.72	3.214	7.136	22.85	5.342	13.99	21.08	13.27	7.684	2.419	Fggy (-396062), Jun (-109223)	0.998931	11.5391	0.519434	0.827465
chr3	133249771	133249836	16.76	23.58	8.238	19.09	14.2	11.71	27.64	15.19	17.28	17.96	9.981	13.42	3.861	Ppa2 (-60306), Arhgef38 (-14915)	0.971647	10.7078	2.77203	0.434137
chr16	22857679	22857902	14.49	2.937	1.929	18.29	6.175	6.575	28.23	4.038	13.31	20.38	9.892	3.476	1.618	Tbccd1 (-222), Dnajb11 (-54)	1.05105	11.6701	0.391384	0.744106
chr5	76905486	76905553	13.39	5.025	3.984	21.09	5.138	10.59	27.04	4.572	19.45	19.85	8.467	12.58	3.886	Aasdh (-6)	1.04044	11.272	0.669078	0.621267
chr4	147123248	147123345	20.5	19.05	18.7	25.9	21.53	19.51	19.96	17.75	24.71	14.52	14.96	19.6	19.28	Gm13139 (-8741), Rex2 (+101447)	1.11362	10.1503	1.80671	0.0382408
chr13	38523343	38523487	22.97	2.279	3.795	13.83	4.128	5.811	21.38	4.805	15.32	22.55	4.977	7.263	7.211	Txndc5 (+5075), Bmp6 (+177699)	1.00898	11.1506	1.41347	0.683817
chr2	121449089	121449236	12.72	5.447	4.807	17.98	6.869	6.458	29.47	3.891	15.46	20.44	11.91	7.749	3.212	Ell3 (-4885), Hypk (-4127), Serf2 (-32)	1.08317	11.5787	0.503669	0.461367
chr15	80133338	80133479	9.826	3.482	3.285	23.32	7.312	4.086	23.89	2.813	10.49	23.48	3.788	7.197	5.49	Tab1 (+255)	1.03534	11.6003	0.545983	1.05163
chr15	81400040	81400155	11.16	4.312	1.775	19.26	6.944	5.409	26.26	6.338	21.84	23.79	10.89	7.711	0.2046	Xpnpep3 (-90), St13 (-55)	1.05019	11.2318	0.963227	0.60235
chr2	155729400	155729584	13.3	1.81	1.485	15.18	5.458	4.572	33.75	2.086	9.9	18.05	6.97	6.32	2.617	Edem2 (-17)	1.0822	11.7025	0.274082	0.584842
chr13	100833308	100833554	17.54	3.325	4.608	16.83	4.934	7.514	23.21	3.105	10.49	22.67	13.6	9.662	2.423	Slc30a5 (-4)	1.03767	11.9259	11.8155	0.746649
chr5	15680716	15680870	20.32	16.44	15.78	23.7	15.88	39.3	16.53	11.96	30.14	19.57	17.11	19.19	16.6	4930572O03Rik (-23734), Speer4c (+33443)	1.00081	10.4529	0.415715	0.303261
chr4	63344433	63344497	9.249	1.167	1.57	15.78	6.432	5.299	16.33	3.777	15.47	38.69	5.069	5.942	0	Orm1 (-95)	1.13152	11.8576	0.109286	0.48025
chr6	38433863	38433941	15.5	5.463	4.731	11.71	0.91	2.981	26.51	2.295	10.93	26.31	3.076	5.11	1.559	Ubn2 (-48)	1.14234	11.871	11.7393	0.628881
chr15	38299293	38299399	12.64	7.439	3.333	18.44	6.596	5.826	27.36	6.789	24	21.49	18.28	10.25	0	Klf10 (+1361), Odf1 (+80143)	1.05309	11.2278	1.05813	0.532765
chr13	37994061	37994304	12.93	3.134	2.947	20.69	6.864	6.204	22.37	5.429	6.096	23.85	8.525	9.059	5.4	Ssr1 (+7)	1.02857	11.9299	0.283235	0.833075
chr8	23257103	23257189	13.44	2.62	1.716	14.86	6.479	3.134	32.3	5.879	10.59	19	8.474	3.38	3.557	Golga7 (-125)	1.07337	11.7461	0.403619	0.598299
chr2	27540343	27540466	15.99	5.316	2.387	12.2	5.309	4.058	22.56	6.435	11.25	28.8	10.65	6.6	3.437	Rxra (-136796), Wdr5 (+25248)	1.17044	11.7315	0.26519	0.387352
chr19	8898017	8898198	13.71	3.93	3.904	18.18	6.029	8.87	22.23	3.578	13.26	25.37	11.92	8.515	1.512	Ganab (+18)	0.992888	11.3303	10.3385	0.815843
chr14	64440630	64440713	11.31	3.732	1.249	22.97	11.37	8.619	20.08	4.424	4.276	25.02	15.05	7.159	0.3685	Msra (+15231), Prss52 (+336386)	1.04735	12.0112	0.59048	0.62916
chr4	155563779	155563840	18.87	10.22	4.711	15.97	12.16	6.628	25.21	3.993	8.475	19.29	11.43	10.76	0.4243	Nadk (+110)	1.06114	11.5365	1.22527	0.570898
chr5	15693552	15693648	10.53	15.74	16.36	37.85	18.96	35.73	14.39	20.37	35.82	16.46	19.11	12.46	17.89	4930572O03Rik (-36541), Speer4c (+20636)	0.986237	10.4021	0.0360508	0.470122
chr6	47788462	47788527	9.64	1.582	1.063	8.587	7.589	2.985	36.54	2.981	16.16	24.42	3.528	10.58	0	Ezh2 (-193465), Pdia4 (+25017)	1.19156	11.3299	0.634749	0.25342
chr4	144960692	144960770	20.26	4.772	1.369	10.69	10.01	3.494	23.33	6.103	10.43	24.66	5.068	4.266	10.3	Vps13d (+13952), Dhrs3 (+67654)	1.12217	10.5715	3.71959	0.314942
chr6	6219876	6219939	22.92	1.127	4.237	12.29	8.619	3.197	21.49	4.715	6.483	22.11	5.46	3.25	0	Slc25a13 (-2790)	1.14113	11.9273	11.8438	0.435277
chr10	50592908	50593005	11.31	3.421	2.558	21.04	1.354	2.84	26.64	6.715	10.28	19.77	6.72	5.692	0.2264	Ascc3 (+288)	1.03032	11.8949	0.234338	0.857054
chr10	99271184	99271247	17.14	4.101	6.729	15.01	4.394	6.324	22.73	8.581	16.75	23.86	6.85	3.483	1.046	B530045E10Rik (-149306), Dusp6 (+7985)	1.03066	11.9455	11.7614	0.712057
chr10	39899176	39899243	4.629	4.185	6.703	17.38	10.22	5.681	29.33	3.497	12.6	27.32	9.481	11.13	2.786	AA474331 (-3389)	1.08319	11.6031	0.856278	0.500557
chr17	46752156	46752421	13.54	4.029	4.717	18.35	6.823	6.662	25.33	4.24	16.72	21.38	12.3	7.672	5.182	Cnpy3 (-75)	1.0346	11.5826	0.4646	0.651453
chr14	65375763	65375833	14.71	2.973	2.961	23.87	4.74	6.622	16.15	6.563	16.28	23.56	6.014	12.12	2.375	Zfp395 (+17122), Pnoc (+49674)	0.956172	11.5165	0.539235	0.979613
chr10	75501792	75501863	12.59	5.001	0	21.38	3.949	2.295	18.08	1.299	12.17	26.17	5.249	7.262	1.944	Gucd1 (+15553), Upb1 (+94917)	1.0066	11.4739	0.920541	1.03914
chr15	38519424	38519592	15.89	4.548	8.356	22.16	7.837	6.524	13.57	15.62	14.93	26.59	7.472	5.92	1.746	Azin1 (-242)	0.962181	12.3493	11.7921	0.776668
chr3	79287333	79287451	10.81	2.615	3.313	13.53	9.098	7.706	23.8	5.207	11.22	29.75	13.23	10.72	0	Rapgef2 (-141517), Fnip2 (+280287)	1.17406	11.8649	0.254717	0.291029
chr19	6980140	6980237	6.736	3.673	4.646	12.19	11.43	9.024	34.81	3.69	12.18	24.1	7.746	6.409	2.021	Fkbp2 (+251)	1.19262	11.5506	1.01883	0.0914275
chr3	53863773	53863956	16.69	6.055	4.625	19.08	6.972	7.114	21.57	6.453	13.58	20.38	11.38	10.23	8.16	Ufm1 (-35)	1.00059	11.6187	0.484439	0.714826
chr5	119338826	119338901	23.3	1.502	4.773	17.98	2.626	5.49	16.96	0.4428	14.18	19.47	10.12	4.778	5.563	Tbx3 (-332154), Med13l (+778145)	0.973721	11.6139	11.4157	1.31277
chr4	146427150	146427250	8.502	7.714	12.25	27.2	13.84	14.37	13.76	17.34	10.7	28.2	8.6	16.27	13.18	Gm13251 (-21823), Zfp600 (+270376)	0.977779	13.5536	11.98	0.393237
chr1	93478832	93479030	11.85	3.958	2.76	15.45	7.062	7.974	28.6	2.945	15.42	21.69	8.763	7.369	2.503	Hdlbp (-123), Sept2 (-33)	1.12042	11.5342	0.483423	0.430324
chr10	127290432	127290743	20.58	4.661	12.76	13.28	11.19	8.996	20.35	8.935	15.56	23.26	13.33	11.8	1.664	Mbd6 (-1698), Ddit3 (-186)	1.04356	11.5317	0.658174	0.29341
chr10	80148765	80148852	16.32	4.616	3.628	24.26	8.281	6.639	20.92	9.289	12.69	15.8	7.822	8.532	7.933	Midn (+537)	0.836575	11.6036	0.477038	1.78188
chr5	93667910	93667974	14.76	14.58	12.91	19.14	16.91	18.19	13.38	11.76	26.13	29.94	15.42	14.97	10.96	Gm16427 (-182596), C87414 (+3609)	1.15879	11.1017	2.14264	0.144257
chr9	25252414	25252486	9.927	2.993	5.539	25.25	6.605	2.756	24.85	2.101	19.09	17.17	13.12	7.313	6.623	Sept7 (+11)	0.943741	11.5757	0.374022	1.43579
chr5	122502203	122502323	23	5.612	10.21	13.97	14.27	8.652	19.16	9.795	9.373	20.96	20.76	16.53	8.922	Atp2a2 (-38)	1.01351	12.1874	0.897853	0.403395
chr9	44767784	44767853	13.99	2.75	1.707	17.83	6.326	0.8586	21.86	3.797	16.47	23.33	8.594	6.571	2.126	Arcn1 (+26)	1.01858	11.4952	0.742344	0.918032
chr8	126735954	126736026	13.95	7.176	2.573	22.16	8.675	12.63	18.29	1.333	12.47	22.46	11.74	14.42	6.623	Irf2bp2 (-142554), Tomm20 (+209931)	1.00016	11.3337	0.901729	0.594614
chr18	69344353	69344423	15.36	2.169	5.63	19.91	8.974	6.58	14.31	6.273	10.88	26.97	10.13	9.429	0.07843	Tcf4 (-122)	0.993679	11.874	11.8185	0.742346
chr4	16185678	16185739	35.8	14.23	4.196	4.416	7.331	4.419	25.79	2.45	3.002	10.47	6.728	101.7	2.97	Ripk2 (-22062)	1.15528	10.4982	1.77178	0.0300683
chr1	85479396	85479509	21.82	11.9	10.69	18.02	25.64	12.88	8.977	20.66	16.35	27.63	17.93	20.47	16.82	C130026I21Rik (-208910), Sp110 (+119364)	0.969238	10.3775	2.73909	0.142216
chr19	6084828	6084974	13.46	2.08	6.152	15.47	8.192	5.214	23.37	4.347	9.946	24.1	6.717	7.464	5.189	Vps51 (-4577), Cdca5 (-82), Zfpl1 (+42)	1.0875	11.8609	0.167634	0.586542
chr11	25202213	25202295	16.53	18.19	13.92	19.93	18.44	19.11	20.07	12.04	17.67	19.75	18.46	20.76	8.905	5730522E02Rik (+568316)	1.05201	10.4622	2.65212	0.0972201
chr7	30232237	30232341	12.85	5.38	2.159	13.8	4.18	13.98	19.43	5.589	19.37	30.04	19.72	9.757	2.836	Tbcb (-17), Polr2i (+341)	0.914321	10.9713	0.896665	0.737931
chr12	80946110	80946231	19.95	3.582	1.583	25.72	7.098	7.552	15.8	2.775	12.5	14.65	5.262	6.497	2.074	Srsf5 (+586)	0.918421	11.2755	0.918616	1.29787
chr3	108086663	108086791	19.89	4.304	2.368	16.4	7.68	10.51	27.03	8.101	15.92	12.77	3.819	8.285	1.513	Ampd2 (-100), Gm12500 (+751)	0.974161	11.5156	0.434497	0.998864
chr4	40181830	40181926	19.48	1.862	1.407	19.21	3.734	12.68	15.94	5.92	20.09	21.44	9.902	7.77	1.699	Aco1 (+38797), Ddx58 (+57950)	0.874105	11.0672	0.544922	1.2524
chr19	7483276	7483365	10.3	2.435	2.699	21.03	8.872	2.496	21.06	1.907	11.89	23.65	3.153	4.951	0	Rtn3 (-32)	1.07621	11.5276	0.720178	0.830407
chr10	12868337	12868451	18.88	4.822	1.887	13.2	7.238	5.716	19.58	1.521	9.582	24.26	9.582	7.827	4.486	Utrn (-6659), Stx11 (+95865)	1.11375	11.6654	0.830848	0.478574
chr6	134897901	134897966	8.187	1.978	1.184	18.83	13.81	5.058	32.44	0.6245	13.14	16.38	8.333	9.564	2.172	Cdkn1b (-22467), Gpr19 (-10102)	1.05274	11.2613	1.24768	0.730533
chr15	85735431	85735535	13.79	3.002	5.315	12.64	4.3	8.487	18.94	6.422	6.156	30.44	13.1	5.977	6.161	Ppara (-293)	1.18128	12.5351	11.1728	0.263933
chr18	66002594	66002725	13.95	1.234	4.255	19.31	6.475	5.042	20.37	5.817	7.398	22.17	10.09	9.714	0.2874	Lman1 (-23)	1.0007	12.0116	0.0121573	0.930607
chr5	93657189	93657265	17.38	12.58	5.558	27.66	18.45	13	11.61	30.13	7.059	19.04	20.75	17.49	10.86	Gm16427 (-171881), C87414 (+14324)	1.05335	13.8101	13.1558	0.399452
chr8	20516045	20516149	16.85	12.14	9.27	16.09	17.15	25.45	25.79	14.64	17.06	16.79	12.72	26.05	17.32	Gm15319 (-152887), Gm21092 (-34234)	1.13974	11.6543	10.938	0.053332
chr3	89246364	89246666	15.89	2.384	4.679	17.38	4.877	4.786	21.03	3.593	9.874	20.94	12.71	4.855	4.285	Trim46 (-618), Krtcap2 (+77)	1.02355	12.0006	11.8659	0.8494
chr11	93995915	93995978	13.54	9.231	5.683	18.38	12.08	6.112	26.93	4.715	19.35	16.24	11.04	8.822	0	Spag9 (-156)	1.01445	11.0343	1.60341	0.580734
chr7	12897717	12897852	12.59	2.431	2.489	16.36	2.971	8.151	29.86	1.613	9.424	16.06	10.13	6.054	0.01162	Zscan22 (-30)	1.06807	11.9323	0.0475583	0.500402
chr10	127030818	127030907	11.94	6.342	8.927	17.11	6.4	12.23	21.49	6.406	13.51	24.3	10.19	2.321	4.785	Tsfm (-23)	1.1115	11.96	11.7133	0.353607
chr10	128058881	128059033	11.22	5.719	5.826	16.61	5.055	7.308	24.76	4.758	13.83	22.19	4.536	4.763	1.027	Ptges3 (+3)	1.12041	11.6245	0.249751	0.394094
chr14	45388837	45388993	10.34	7.762	5.013	15.83	8.793	13.44	26.84	6.765	10.91	21.74	15.35	6.505	2.398	Gnpnat1 (-113)	1.12873	12.2869	12.225	0.100246
chr11	120549705	120549766	21.27	1.927	4.788	18.58	6.778	8.668	23.17	8.832	11.24	11.66	4.526	9.441	0	Fam195b (-9)	0.93182	11.8088	11.702	1.05676
chr17	65613907	65614034	18.79	3.336	5.23	19.15	9.501	5.901	16.33	4.417	18.33	20.34	14.68	4.319	3.014	Vapa (-416)	0.936336	11.3781	0.575091	0.920696
chr5	123137775	123137871	22.71	2.27	3.697	14.68	5.12	4.459	15.56	1.922	9.083	21.53	4.652	8.228	9.355	Setd1b (-4370)	1.11604	11.3905	1.76445	0.657525
chr19	46075863	46075973	14.43	4.742	3.283	24.48	4.581	5.789	18.72	6.71	24.44	16.77	6.351	12.3	2.439	Nolc1 (+55)	0.95695	10.9306	0.98559	0.902606
chr9	106247905	106247977	6.735	3.384	6.368	28.53	10.45	5.595	16.53	4.203	11.01	22.59	7.544	5.739	3.824	Alas1 (-211)	1.00143	11.6562	0.862147	0.826552
chr2	157135210	157135301	14.1	2.435	4.866	16.35	12.54	6.087	28.08	7.502	21.66	15.7	7.461	8.057	0.8619	Samhd1 (+9)	0.988209	10.9286	1.42861	0.701755
chr3	33800114	33800181	17.27	2.248	3.867	14.59	1.774	5.394	16.43	7.436	14.05	25.78	7.049	10.15	2.622	Ttc14 (-103)	0.987947	11.667	0.0158971	0.90641
chr2	83644408	83644530	10.92	4.596	5.586	17.62	6.08	6.822	21.55	8.5	19.95	23.97	7.915	11.12	2.764	Zc3h15 (+34)	1.07665	11.4157	0.372088	0.446702
chr18	38177427	38177566	12.47	1.145	6.258	18.39	7.238	12.71	23.19	5.363	15.44	19.48	8.847	7.826	3.515	Arap3 (-179923), Pcdh1 (+32265)	1.04302	11.7461	11.4572	0.629675
chr11	103697659	103697732	15.23	1.392	1.785	17.9	8.97	5.173	24.9	7.659	15.65	15.45	10.23	7.514	1.719	Gosr2 (+202)	0.941101	11.4857	0.753748	1.01245
chr10	127121191	127121294	13.48	1.117	2.287	14.99	6.409	3.638	24.64	1.075	7.474	20.29	4.849	8.219	0	Os9 (-83)	1.06943	11.7068	0.33459	0.760362
chr9	109832632	109832771	7.781	4.466	4.575	18.76	10.14	6.276	30	5.668	13.16	16.85	8.315	14.88	3.916	Nme6 (-56)	1.0359	11.2252	1.19278	0.483512
chr8	90908077	90908384	11.99	6.301	5.785	18.6	9.803	7.164	19.56	10.12	14.58	23.16	14.12	9.874	2.399	Gm6658 (+184)	1.02134	11.4224	0.896492	0.596965
chr7	128523604	128523767	19.36	2.223	2.283	17.07	3.397	4.634	17.45	2.264	10.73	19.43	13.91	6.394	2.031	Bag3 (+103)	0.965337	11.714	0.144374	1.20694
chr2	70661417	70661608	12.78	4.564	7.884	19.94	7.915	7.227	22.82	4.647	12.84	17.63	11.45	11.4	4.402	Gorasp2 (-63)	0.940295	11.7097	0.220443	1.00314
chr11	6626043	6626133	18.6	6.448	3.263	13.08	7.887	6.961	23.48	4.613	13.13	17.99	11.05	7.801	4.967	Tbrg4 (-45)	1.05509	11.6315	0.742052	0.576551
chr7	80947830	80947934	13.2	1.789	10.09	22.12	5.869	3.133	18.21	4.081	9.475	19.54	9.952	7.806	1.885	Sec11a (-102)	0.964801	12.0217	11.8301	1.02763
chr4	141538752	141538844	13.69	3.54	6.008	10.14	5.131	11.53	26.52	3.369	11.63	22.69	6.921	8.665	0.0341	Spen (-201)	1.13144	12.3013	10.7399	0.183044
chr3	56575641	56575736	13.56	21.82	12.38	21.17	14.68	22.71	24.65	15.34	25.32	13.62	16.64	26.56	13.85	Nbea (-391988), F830104G03Rik (+314904)	1.04343	10.1616	2.77636	0.268746
chr13	51651657	51651772	10.32	2.896	2.417	15.6	4.799	4.327	24.92	4.733	8.244	22.09	7.098	6.169	0.02046	Secisbp2 (+18)	1.08206	11.7901	0.332487	0.571538
chr6	140623462	140623590	13.9	6.964	5.741	20.54	5.129	14.97	13.03	6.083	13.73	25.42	7.898	14	1.287	Aebp2 (+27)	1.15005	12.103	11.8757	0.340114
chr15	31224286	31224425	13.31	4.175	5.852	20.97	5.783	4.411	23.11	6.093	17.29	15.49	10.18	4.406	4.429	Dap (-29)	1.00103	11.5863	0.372015	0.812178
chr12	108894165	108894289	14.77	2.241	2.178	15.2	3.406	6.414	23.77	4.062	11.95	19.07	11.02	6.016	0.9171	Wars (-1030), Wdr25 (-90)	1.04177	11.7967	0.0915748	0.751993
chr7	122067194	122067257	19.19	4.723	3.639	15.29	4.619	5.642	21.41	4.832	9.647	16.87	3.425	8.503	0	Ears2 (+37), Ubfd1 (+51)	1.00222	11.7051	0.296743	0.944774
chr9	21822862	21822926	13.19	1.071	2.846	14.29	9.15	4.258	20.24	7.784	11.34	25.04	11.5	9.542	7.083	Kank2 (-24348), Gm6484 (-12616)	1.0568	11.8147	0.445967	0.591182
chr16	96082424	96082552	9.372	4.725	4.269	18.58	8.401	13.31	27.34	5.824	10.79	17.39	7.968	9.684	2.12	Brwd1 (-60)	1.05047	11.7596	0.195888	0.384391
chr13	34874272	34874337	15.21	2.656	8.527	11.97	4.368	2.301	21.59	9.708	6.932	23.85	9.192	4.754	2.992	Prpf4b (-1189)	1.10149	12.1979	11.9102	0.465556
chr15	31583793	31583861	15.74	3.457	0.9236	12.49	0	5.685	11.57	10.18	13.63	32.82	6.546	6.48	2.768	Cmbl (+14922), Cct5 (+18020)	0.843866	11.5539	0.622513	1.29749
chr4	124850687	124850823	10.26	3.376	3.521	19.15	5.284	3.507	19.87	6.756	11.15	23.3	8.332	8.483	4.36	1110065P20Rik (-25), Yrdc (+76)	1.06342	11.8955	0.533884	0.571002
chr7	46033655	46033727	9.053	3.129	3.904	17.99	9.242	7.508	25.61	2.563	9.522	19.92	10.14	11.73	0	Abcc6 (-3389), Nomo1 (-7)	1.06886	11.6107	0.602635	0.484037
chr6	136519059	136519187	11.66	2.391	6.563	18.82	12.41	3.911	23.15	3.921	10.9	18.92	7.403	9.042	1.134	Atf7ip (+272)	0.997827	11.5878	0.822378	0.922275
chr4	126677586	126677656	10.17	4.478	5.07	19.02	12.57	1.1	19.83	2.636	12.73	23.42	7.587	12.85	0	Psmb2 (-9)	1.02098	11.3241	1.45812	0.82707
chr1	56782060	56782143	14.95	4.956	15.8	25.98	8.68	12.49	15.11	11.6	15.07	16.34	9.271	19.01	8.023	Hsfy2 (-144651), Satb2 (+189756)	0.816114	11.2622	0.16855	1.08887
chr14	44684052	44684113	21.68	11.98	13.98	20.53	8.727	8.012	18.17	9.347	17.35	11.97	14.37	8.662	14.16	Gm8267 (+40904), Gm8247 (+100930)	0.910071	11.6506	0.0611382	0.519486
chr17	78072325	78072404	7.115	15.37	7.056	29.77	5.009	19.91	14.84	10.07	9.54	20.61	11.04	15.67	14.97	Crim1 (-127883)	0.905456	12.2748	10.6331	0.848042
chr9	115310531	115310660	9.727	0.09491	1.448	22.12	2.449	5.017	14.5	4.849	17.19	25.97	13.18	1.701	0.3466	Stt3b (-175)	0.969601	11.7693	0.148068	0.867952
chrX	126773631	126773731	16.64	11.13	12.33	20.1	7.346	16.11	12.37	12.97	11.31	23.16	13.5	10.24	9.71	4932411N23Rik (+60323)	0.995234	13.4665	11.4609	0.416704
chr10	58446759	58446931	12.59	3.936	2.41	19.64	4.24	7.474	21.78	6.158	10.04	18.2	14.31	9.461	1.368	Ranbp2 (-7)	0.994386	10.672	1.57408	0.595403
chr10	58446759	58446931	12.59	3.936	2.41	19.64	4.24	7.474	21.78	6.158	10.04	18.2	14.31	9.461	1.368	Ranbp2 (-7)	1.12488	13.8332	11.2198	0.33467
chr14	55092381	55092455	8.531	2.713	1.273	19.51	11.68	9.527	25.96	7.804	15.94	18.17	9.379	8.993	0	Thtpa (-2417), Zfhx2 (-94)	0.972787	11.378	1.0316	0.898408
chr12	91849289	91849358	12.18	3.602	1.502	15.6	1.337	3.091	28.82	3.984	19.64	15.56	5.838	2.358	6.365	Sel1l (-167)	1.07067	11.3831	0.49024	0.721306
chr3	88553602	88553680	17.72	5.117	5.798	12.92	8.963	9.532	15.03	8.232	15.96	26.48	7.892	12.19	1.086	Lamtor2 (-617), Ubqln4 (-75)	0.874019	11.6819	0.197311	0.844753
chr3	8923718	8923865	9.286	2.091	2.713	15.88	6.989	2.287	24.16	4.268	13.72	22.79	10.61	8.221	0.1921	Mrps28 (+126)	1.04497	11.7851	0.294777	0.895148
chr17	56256053	56256145	15.06	2.954	9.353	19.07	11.11	5.94	15	3.45	5.038	22.88	5.51	6.141	0.04263	Fem1a (-694)	1.07424	11.8283	11.732	0.568664
chr2	27597168	27597243	19.14	4	6.26	19.96	2.437	7.168	13.38	7.848	25.2	19.52	12.47	13.21	0	Rxra (-79995), Wdr5 (+82049)	0.900288	10.8497	0.623754	1.08214
chr2	51774657	51774743	17.54	17.16	14.31	22.23	14.53	10.4	17.37	8.046	9.573	14.85	8.158	17.09	4.742	Tas2r134 (+147189), Rbm43 (+160463)	0.977323	11.2675	1.25494	0.384965
chr19	23135745	23135922	10.07	5.755	6.449	21.95	13.83	11.1	14.72	7.516	22.04	25.2	13.47	8.801	3.359	Klf9 (-5392), Trpm3 (+996715)	1.01391	11.2744	0.911593	0.254122
chr1	171294347	171294785	12.53	3.382	4.406	12.82	7.24	4.805	26.94	5.123	4.803	19.57	10.93	8.215	2.16	Ufc1 (+458)	1.07145	12.3065	0.704638	0.341731
chr9	100643157	100643324	16.8	6.129	6.619	17.58	6.195	6.58	20.57	6.928	21.71	16.85	14.25	10.17	2.452	Stag1 (-207)	0.961797	11.3335	0.55886	0.737831
chr12	80132598	80132700	11.76	6.194	7.943	19.27	10.68	7.347	29.71	7.127	8.771	10.95	10.77	13.55	0	Zfp36l1 (-19636), Actn1 (+127722)	0.982849	11.9896	0.437489	0.301953
chr4	33031303	33031441	16.07	4.197	4.688	16.77	6.494	5.613	16.64	4.666	13.2	22.15	12.51	7.963	0.1194	Ube2j1 (-44)	0.98157	11.6223	0.202987	0.748835
chr12	59011931	59012052	14.56	3.41	2.855	21.7	6.101	6.903	12.72	5.459	7.822	22.63	8.168	4.352	1.893	Gemin2 (-1401), Sec23a (+25)	0.960144	11.9878	0.11969	0.94387
chr17	65884832	65884914	10.06	5.077	4.251	18.83	7.661	9.717	21.82	0	11.5	20.86	17.22	9.008	7.346	Ralbp1 (+882)	1.08027	11.304	0.127263	0.504595
chr19	4097123	4097422	14.07	4.476	4.217	14.62	5.454	5.771	25.08	5.14	15.47	17.76	12.07	9.851	2.513	Pitpnm1 (-3349), Cdk2ap2 (+91)	1.04993	11.628	0.293504	0.56104
chr10	79934318	79934480	8.435	3.038	2.501	20.11	1.577	8.155	17.3	8.292	22.43	25.68	9.742	7.358	4.067	Wdr18 (-25753), Arid3a (+7356)	0.980229	11.4696	0.309311	0.623243
chr8	123373760	123373846	17.61	2.705	5.295	13.01	10.07	4.168	25.96	0.7724	9.686	14.9	11.51	6.08	1.733	Tcf25 (-21)	1.05176	11.7585	0.316983	0.59852
chr4	152027624	152027688	11.56	4.362	3.729	14.29	9.039	6.156	19.09	3.748	13.73	26.5	3.112	1.543	2.794	Zbtb48 (+5)	1.19869	11.1779	1.21938	0.385419
chr10	17723054	17723178	11.78	5.944	6.23	26.09	11.59	5.59	18.28	10.3	11.21	15.27	13.29	5.22	2.72	Cited2 (-112)	0.831394	12.1443	0.183526	1.70956
chr8	71131751	71131882	23.19	15.9	18.47	18.3	17.64	11.26	16.42	14.42	11.79	13.44	15.85	16.2	13.57	Myo9b (-140897), Gm17576 (-88777)	0.988438	13.1383	12.4399	0.117285
chr5	32458832	32459109	12.94	3.284	4.302	16.11	8.437	4.914	24.14	6.981	16.15	18.16	7.844	5.993	2.475	Ppp1cb (-3)	1.01883	11.4574	0.66231	0.627913
chr11	112732620	112732691	20.18	3.518	0.4644	13.28	1.749	2.336	17.2	2.625	6.46	20.65	5.801	7.288	7.655	Gm11678 (-301020), Sox9 (-49568)	1.04941	11.7687	0.317274	0.837711
chr13	24831612	24831682	15.88	3.253	5.563	16.1	4.462	4.147	22.88	1.054	17.97	16.38	10.22	9.298	9.21	Acot13 (-130), Tdp2 (-32)	1.02099	11.5161	0.306906	0.805538
chr4	155943773	155943836	15.79	4.47	7.078	13.2	4.197	4.984	17.78	7.058	11.4	24.46	7.807	5.891	0.2988	Ube2j2 (-45)	1.07045	11.9907	11.6533	0.496417
chr6	87838831	87838921	10.92	1.524	7.729	15.99	6.506	10.04	22.23	9.779	15.49	22.08	3.99	10.24	0	Isy1 (-117)	1.06786	11.7635	11.1479	0.425639
chr10	127063515	127063597	12.86	2.255	5.17	12.43	13.57	9.771	29.63	5.333	11.94	16.26	4.453	5.842	5.136	March9 (-3372), Cdk4 (+22)	1.15083	11.5704	0.118259	0.312873
chr16	13819214	13819292	10.25	4.992	4.67	16.37	9.828	10.33	23.88	6.34	11.93	20.64	13.66	6.235	3.238	Ntan1 (+2)	1.10556	11.7104	0.688435	0.32616
chr14	73143266	73143362	12.99	4.948	3.827	12.22	10.28	3.487	21.26	4.075	11.55	24.67	4.401	11.66	1.83	Rcbtb2 (+777)	1.16698	11.1055	1.90127	0.394842
chr1	46567404	46567475	13.66	12.45	5.949	21.31	7.423	13.52	17.8	11.51	16	18.25	9.435	17.74	15.1	Dnahc7c (-41521), Dnahc7b (+500702)	0.956824	11.2821	0.47849	0.527552
chr7	73618417	73618695	9.367	4.21	9.365	21.39	9.409	10.65	19.62	9.511	12.16	20.64	14.64	12.83	0	Fam174b (-121751), Chd2 (-76810)	0.967779	12.078	11.8947	0.609139
chr12	86801295	86801481	13.26	1.198	6.551	19.17	6.869	11.02	14.56	4.821	13.45	24.02	9.523	6.959	1.054	Gm6772 (+67005), Irf2bpl (+83426)	0.994722	12.2202	11.1646	0.615542
chr17	34180130	34180248	15.72	5.063	1.038	11.94	4.602	6.727	28.03	1.689	17.09	15.29	1.739	8.491	2.207	Tap1 (-7364), H2-DMb1 (+27117)	1.11777	11.3759	0.394286	0.641746
chr3	153912974	153913041	11.75	5.226	2.672	15.19	17.14	10.88	28.81	7.16	22.45	15.22	8.467	5.294	4.846	Rabggtb (-805)	0.850678	11.0257	1.89264	1.49829
chr4	116651624	116651707	15.29	2.154	3.197	15.29	3.977	3.283	23.63	2.534	11.03	16.72	7.562	5.617	4.47	Akr1a1 (+14)	1.02916	11.7625	0.14253	0.880016
chr2	15055114	15055231	10.16	3.861	3.422	26.55	4.474	4.76	11.7	4.668	12.99	22.52	8.679	6.72	3.298	Arl5b (-109)	0.929934	11.4313	0.906842	1.1959
chr5	142400173	142400303	13.14	4.86	7.537	14.63	4.204	5.958	19.95	5.72	7.044	23.14	10.56	7.946	4.808	Foxk1 (-1259)	1.0771	12.2532	11.5985	0.47177
chr4	49560100	49560165	10.66	5.274	2.657	12.95	3.822	10.25	15.61	5.677	15.83	31.6	10.45	6.891	12.31	Aldob (-10587), Tmem246 (+37743)	0.888306	10.6203	1.28206	0.678287
chr12	108850290	108850405	17.93	5.589	2.253	19.71	6.481	4.958	17.75	0.5616	16.98	15.43	7.478	7.87	0.0682	Slc25a47 (-781)	0.951499	11.0879	1.04975	1.17552
chr2	34826186	34826252	17.27	4.415	1.19	21.47	7.152	14.68	21.86	1.957	15.81	10.19	12.21	13.96	2.115	Fbxw2 (-146)	0.95592	10.9008	0.82575	0.899616
chr16	91484965	91485193	13.83	1.724	3.037	9.441	5.222	3.293	28.84	2.614	14.01	18.65	8.722	6.239	1.703	Ifnar1 (-159)	1.11597	11.7159	11.7117	0.491885
chr1	134093037	134093234	11.71	2.934	4.91	15.25	9.071	7.059	24.24	3.849	16.13	19.55	12.44	10.55	3.631	Chit1 (-18106), Btg2 (-14016)	1.068	11.5957	0.40562	0.511305
chr15	58135079	58135151	13.08	3.979	1.985	22.66	5.299	8.557	18.41	1.845	13.98	16.52	11.84	11.53	3.682	Atad2 (-33)	0.952529	11.1078	1.15096	1.26002
chr1	118311194	118311258	5.953	4.706	7.458	17.93	10.43	6.618	18.13	8.707	7.344	28.6	10.84	10.23	0.07353	Tsn (-94)	1.15171	11.8392	0.422441	0.31242
chr2	144556173	144556275	19.03	2.833	2.263	11.82	2.853	5.43	20.01	0.7236	15.4	19.74	9.053	11.35	3.737	Sec23b (-32)	1.10186	11.6036	0.168521	0.52881
chr19	8741408	8741523	15.26	2.853	0.6281	16.5	7.422	4.379	16.37	6.755	9.893	22.44	11.52	4.134	1.466	Stx5a (+53), 1700092M07Rik (+748)	0.976046	12.0601	0.269111	0.868303
chr4	147732105	147732181	24.59	7.685	10.97	16.22	13.12	11.91	6.697	21.63	12.77	23	16.24	10.03	16.85	Zfp534 (-29590), Gm13157 (+77645)	0.970267	13.7016	0.600683	0.655539
chr3	144871483	144871579	15.1	14.02	7.606	24.4	8.706	9.442	11.3	13.61	11.62	19.69	8.016	7.104	17.13	Clca4 (-22174), Gm6289 (+24480)	0.893025	12.0984	0.304161	0.617616
chr9	122117250	122117313	5.723	3.42	7.876	21.3	16.08	8.604	28.98	2.636	7.923	14.47	11.06	9.055	0	Snrk (-57)	1.04439	11.5415	0.91213	0.433349
chr10	17722338	17722472	16.87	2.796	3.117	16.55	3.39	8.599	18.42	4.682	11.54	18.59	9.819	8.459	2.025	Cited2 (-823)	0.984492	11.4685	0.486772	0.961963
chr2	177314791	177314856	8.962	14.15	13.09	14.31	9.773	12.71	22.93	8.431	14.31	24.22	12.35	20.31	10.55	Gm14409 (-47788), Gm14412 (+9483)	1.1097	10.4864	2.78137	0.156697
chr7	140857356	140857419	13.52	0.8551	2.293	13.22	3.126	6.512	26.35	3.866	8.309	17.16	4.838	8.503	0	Bet1l (-1005), Ric8 (+431)	1.05267	11.9155	11.6428	0.629859
chr4	146174931	146175048	19.48	10.97	4.402	22.01	19.58	18.25	13.55	11.67	24.14	15.18	9.337	9.923	5.497	Gm13251 (-274033), Zfp600 (+18166)	1.01497	10.4677	2.00254	0.137329
chr1	37865062	37865205	13.24	2.432	1.768	16.85	7.545	9.632	22.4	3.535	14.98	17.73	9.338	6.981	0	Tsga10 (-55)	1.04759	11.4532	0.461893	0.735441
chr8	123477812	123477885	19.78	1.526	5.593	11.46	7.949	5.194	25.68	8.973	21.89	13.23	10.07	5.685	6.393	Afg3l1 (-54)	0.953959	11.5422	0.362587	0.881949
chr17	47842331	47842429	13.66	1.599	3.477	14.07	9.198	4.745	13.31	2.805	11.23	29.06	6.405	4.03	4.098	Mdfi (-7689), Foxp4 (+82055)	1.07241	11.6372	0.361548	0.608917
chr5	113735583	113735858	13.74	3.54	3.894	15.06	5.84	4.545	21.81	3.744	11.24	19.44	8.543	3.371	2.302	Ficd (-61)	1.05452	11.7859	0.251764	0.702713
chr7	26055317	26055387	10.55	6.192	0.987	20.17	4.487	8.23	16.64	4.745	16.92	22.68	15.76	6.713	4.224	Cyp2b13 (-6143), Cyp2b10 (+157732)	0.948347	11.0499	1.21045	0.815823
chr12	8921938	8922072	8.812	4.569	4.125	19.19	8.078	5.836	24.42	4.764	19.84	17.59	11.19	6.331	2.049	Laptm4a (+341)	1.09564	11.2437	0.848734	0.537079
chr10	69213063	69213148	14.61	5.042	6.484	21.7	4.697	8.241	18.55	3.408	14.7	15.12	1.988	7.227	2.86	Rhobtb1 (-88), A930033H14Rik (-8)	0.96088	11.0852	0.615697	1.1954
chr3	16837559	16837629	11.7	11.88	5.159	28.88	12.6	7.976	11.05	11.78	9.493	18.3	8.342	4.937	11.23	Gm5283 (+393382), Ythdf3 (+654411)	0.923756	10.4676	2.3799	0.962881
chr11	116843484	116843684	8.911	3.698	2.151	20.57	7.719	9.242	23.65	8.488	14.12	16.77	7.801	7.551	4.196	Jmjd6 (-135), Mettl23 (+306)	0.955974	11.3361	0.973178	0.881065
chr14	55643537	55643610	24.35	3.438	5.141	4.755	8.289	8.825	20.15	3.362	8.992	20.57	7.895	13.55	0	Tm9sf1 (+232)	1.16117	11.9156	0.013679	0.187015
chr12	88149449	88149519	8.592	14.15	14.67	31.08	7.478	5.818	13.15	15.02	2.732	16.94	11.12	3.422	3.922	Gm10436 (+32410), Gm16368 (+65787)	0.891185	13.2083	11.5093	1.41705
chr12	12810286	12810349	13.52	1.03	5.708	20.84	6.168	7.852	24.05	2.138	9.698	11.35	14.18	3.105	0	Rpl36-ps3 (-101668), Fam49a (+548179)	0.976682	11.9139	11.7922	0.926065
chr5	142401430	142401502	12.42	2.109	6.019	25.83	6.506	9.298	14.44	5.843	6.888	17.02	6.329	14.58	0.1089	Foxk1 (-31)	0.894769	11.7074	0.0928402	1.31067
chr13	43864735	43864801	9.017	7.291	15.65	18.82	8.657	6.059	26.73	11.41	18.39	15.14	10.86	5.43	0	Jarid2 (-866503), Cd83 (+79661)	1.0067	12.5176	11.1406	0.362655
chr1	36068193	36068359	12.03	6.623	5.411	15.93	10.04	6.424	20.98	3.624	16.01	20.66	7.526	11.23	1.394	Hs6st1 (-124)	1.11809	11.3101	0.982849	0.394304
chr16	26705838	26705899	21.52	3.733	1.75	11.1	4.073	5.147	18.13	7.804	16.31	18.52	3.042	5.185	0	Il1rap (+124165), Gmnc (+284105)	0.999033	10.9498	1.65118	0.607058
chr17	53479169	53479334	10.79	3.243	2.579	17.1	7.657	4.461	14.88	4.205	4.921	26.42	7.206	2.715	0.8128	Rab5a (+18)	1.09117	11.9397	0.25635	0.614605
chr7	81523446	81523515	20.4	0.692	7.35	13.91	8.95	6.611	22.13	5.027	13.79	12.75	3.608	9.142	0	BC048679 (-25200), Fsd2 (+43463)	0.976407	11.4097	0.455944	0.836563
chr6	85936938	85937031	14.78	4.7	4.305	15.03	8.014	5.892	17.86	6.627	13.4	21.29	18.79	8.021	8.29	Nat8b (-3606)	1.00543	11.8616	0.281894	0.668369
chr17	55892316	55892379	9.246	6.996	4.212	15.89	5.352	4.326	21.92	3.837	14.61	21.88	10.23	8.271	1.805	Zfp959 (+164)	1.0999	11.4005	0.865927	0.518277
chr11	101362407	101362468	18.71	1.325	4.556	14.44	6.836	10.29	9.025	3.69	34.25	26.73	6.703	13.28	3.227	G6pc (-5123), Aoc3 (+31833)	1.08013	10.6196	0.604649	0.6608
chr8	105269730	105269794	13.33	6.237	5.447	19.75	10.92	3.749	9.492	8.015	17.07	26.26	6.837	8.285	0.7353	Hsf4 (-39)	0.928186	11.1806	1.15983	0.827921
chr13	52981264	52981327	7.622	4.081	0	16.49	8.14	10.7	26.16	3.69	21.51	18.53	7.64	5.746	7.719	Nfil3 (-223)	1.12519	10.9569	1.27205	0.527355
chr13	75196389	75196466	11.7	19.56	7.137	26.54	18.16	10.02	17.63	6.518	12.4	12.81	11.01	12.66	2.282	Ell2 (-511056), Pcsk1 (+106602)	0.859496	10.5183	2.56129	0.940402
chr8	33653441	33653511	9.851	2.046	7.627	17.1	8.822	4.612	13.24	4.27	10.6	28.39	8.169	6.556	3.619	Gsr (+238)	1.11008	11.8517	11.8066	0.446398
chr4	108118520	108118583	12.77	3.731	6.231	13.79	2.986	12.11	24.92	4.657	23.46	17.1	11.85	13.03	2.677	Scp2 (-20)	1.10595	11.5064	11.0531	0.381216
chr7	141447559	141447629	11.49	2.589	4.531	14.91	7.529	8.273	20.27	2.952	17.69	21.82	11.83	5.668	0	Lrdd (-3569), Rplp2 (+224)	1.13126	11.5805	0.105438	0.446551
chr8	20494201	20494273	19.96	14.35	10.34	11.64	15.18	14.71	18.47	21.76	11.86	18.36	14.73	10.94	16.79	Gm15319 (-131027), Gm21092 (-56094)	1.16925	10.9179	1.84728	0.0588549
chr5	50059046	50059109	11.1	4.178	5.209	16.98	10.28	5.713	17.57	8.288	13.3	22.74	7.831	9.78	3.249	Gpr125 (-82)	1.09614	11.7131	0.801832	0.289604
chr17	26592713	26592778	7.048	11.02	2.295	13.95	7.18	11.01	17.61	1.306	24.76	29.77	9.958	8.017	4.452	Atp6v0e (-83666), Ergic1 (+31257)	1.0653	10.2835	2.56402	0.453728
chr12	85824859	85824938	7.055	3.937	3.538	20.49	6.02	7.761	20	1.915	7.016	20.8	8.575	7.29	2.363	0610007P14Rik (-377), Ttll5 (+189)	1.03972	11.8664	0.424522	0.713608
chr3	94310187	94310285	10.28	2.461	5.191	15.62	1.141	6.529	20.41	2.881	16.95	22.01	7.883	6.063	3.874	Them4 (+147)	1.09521	11.5987	11.5249	0.59221
chr13	58215603	58215715	14.11	2.372	4.052	19.31	4.468	14.92	18.68	3.789	14.82	16.21	10.84	10.84	1.786	Ubqln1 (-6)	1.04932	11.2771	1.36099	0.443561
chr2	156720866	156720995	12.53	4.584	3.859	17.36	5.323	5.247	17.88	9.326	9.888	20.5	9.778	7.058	1.484	Myl9 (-54489), Dlgap4 (+107226)	1.01572	12.2304	12.1443	0.60564
chr11	77982422	77982590	8.415	5.364	3.701	20.74	6.253	8.463	19.12	2.175	10.84	19.92	11.94	5.703	1.625	Phf12 (-296)	1.05203	11.2446	1.8334	0.927372
chr13	94358894	94358994	11.24	3.747	6.155	17.59	7.24	7.849	22.54	9.263	5.867	16.7	10.8	8.008	2.808	Gm9776 (-126), Ap3b1 (-16)	1.05183	12.4887	11.8792	0.505372
chr9	13749100	13749223	12.06	1.483	5.17	11.46	7.79	6.839	19.14	2.55	9.158	25.39	6.649	7.12	0.102	Mtmr2 (+752)	1.18061	11.9755	0.00281943	0.336686
chr17	23552201	23552264	12.92	2.779	4.76	12.19	0	7.147	23.58	3.046	7.846	19.36	8.55	7.691	5.664	Vmn2r117 (-72636), Casp16 (+1333)	1.05035	12.2047	11.3785	0.654767
chr5	15051776	15051866	15.92	19.1	8.095	22.33	12.18	40.55	18.96	16.36	26.18	10.79	14.25	14.5	10.28	Speer4d (-567243), Gm10354 (-72886)	1.02363	10.4193	0.863347	0.285603
chr2	144270847	144270989	13.33	3.251	4.169	17.23	4.786	3.056	22.45	2.157	15.47	14.99	6.715	5.897	2.038	Snx5 (-12), Mgme1 (+18)	1.03155	11.4944	0.449801	0.811833
chr9	102717587	102717667	9.269	4.27	10.09	21.29	9.516	12.55	25.49	9.456	12.78	11.95	13.69	8.845	8.774	Amotl2 (-41)	0.97592	12.0901	11.5555	0.431099
chr11	50325624	50325705	6.939	4.353	4.788	22.9	9.091	8.648	22.47	10.36	19.55	15.65	15.31	8.69	0.0581	Canx (+8)	0.828519	12.4071	11.4638	1.7043
chr10	81417027	81417095	5.371	4.573	7.181	12.84	3.732	8.69	21.64	7.435	17.26	28.1	7.145	5.754	2.664	Nfic (+10112), 2210404O07Rik (+24010)	1.09959	11.2251	11.1024	0.426317
chr6	125313880	125313943	18.69	3.945	6.381	16.82	8.14	12.95	17.55	7.703	16.75	14.85	7.233	6.356	0	Ltbr (-27)	1.00805	10.9558	0.82412	0.467694
chr2	27426559	27426622	16.02	10.13	7.776	14.66	6.506	4.937	20.83	10.4	9.57	16.3	6.873	13.38	5.042	Vav2 (+442)	1.0098	11.5879	0.815889	0.542166
chr13	54468820	54468918	9.286	2.324	6.954	12.77	9.959	4.987	22.83	1.657	8.897	22.87	12.32	10.86	2.369	Thoc3 (-20)	1.16889	11.9224	0.420415	0.323565
chr12	13269052	13269159	17.14	1.682	2.289	11.05	4.179	7.461	25.84	1.017	9.861	13.72	12.18	3.486	1.73	Nbas (-21)	1.05755	11.9829	11.7922	0.649045
chr17	14978761	14978865	17.98	2.672	3.412	15.67	9.128	7.348	20	5.287	13.96	14.06	14.51	8.685	1.063	9030025P20Rik (-51), Gm3417 (-1)	0.918455	11.696	0.393771	0.980905
chr16	13668054	13668202	12.98	3.574	3.544	14.19	8.321	3.282	24.58	4.688	6.132	15.95	8.502	3.484	3.826	3110001I22Rik (-3801), Bfar (-3730), Parn (+42)	1.05952	11.8311	0.492194	0.591544
chr16	93603766	93603836	7.287	5.632	2.826	25.86	5.729	3.385	15.97	1.687	14.91	18.57	11.08	7	0	Cbr1 (-4036), Setd4 (+14)	0.934943	11.1844	1.2689	1.23855
chr9	35211080	35211243	12.89	1.442	4.2	15.44	6.118	3.98	20.63	8.886	14.78	18.62	7.951	4.318	2.213	Foxred1 (-182), Srpr (+7)	0.998947	11.8226	0.00513646	0.71927
chr9	57645652	57645722	8.187	5.422	11.93	25.61	8.568	11.51	16.17	2.53	16.02	17.61	8.751	7.627	1.031	Csk (-34)	1.00143	11.557	0.0911183	0.483468
chr1	75317773	75317870	11.93	2.146	1.457	8.892	5.067	5.298	28.37	2.416	9.223	18.35	7.124	6.05	0	Dnpep (-185)	1.13221	11.7638	0.0785622	0.337404
chr17	71002590	71002674	11.1	1.224	2.243	23.62	11.07	6.629	26.67	4.13	8.219	6.136	12.21	3.134	3.324	Myl12a (-78)	0.934501	11.7081	0.635957	1.22217
chr7	45568216	45568360	6.844	2.449	3.119	14.93	7.492	7.199	24.92	5.33	14.41	20.78	10.65	7.72	0	Bcat2 (-1865)	1.08768	11.5708	0.611343	0.436435
chr10	7753794	7753864	17.27	14.31	12.74	21.24	8.365	11.64	14.03	9.753	9.678	14.83	8.967	8.201	15.13	Ginm1 (+27088), Katna1 (+27829)	0.909166	12.3418	11.1429	0.556695
chr15	57892031	57892101	10.21	1.434	5.204	21.59	13.79	1.058	10.95	3.427	14.84	24.6	16.42	4.728	1.625	Derl1 (+352)	0.947834	11.6817	0.904292	0.768734
chr11	74649402	74649479	11.06	5.072	4.507	21.33	6.476	7.405	17.06	4.673	26.56	17.87	16.52	7.147	0	Cluh (-74)	1.02204	10.6121	0.670224	0.658918
chr1	172082770	172082873	15.8	3.162	2.134	19.51	6.185	1.956	12.94	6.718	9.74	19.06	8.452	2.538	0.07615	Ncstn (-27), Copa (+293)	0.924909	11.953	0.440144	1.23206
chr10	99261791	99261863	6.735	5.119	5.91	18.81	13.21	5.163	17.39	2.845	10.74	24.36	10.33	9.7	12.2	Dusp6 (-1404)	1.08199	11.4261	1.53573	0.314972
chr5	53589399	53589469	14.12	3.533	4.935	21.18	9.861	9.775	15.95	2.056	17.18	15.95	12.29	4.257	4.829	Rbpj (-781)	1.0636	11.3012	2.02969	0.433792
chr11	53452541	53452647	17.59	5.186	2.178	14.47	6.629	4.75	14.99	7.172	8.975	20.05	10.39	3.277	4.484	Shroom1 (-4611), Gm10447 (+4516)	0.912237	11.6413	0.719033	1.10955
chr3	88296900	88296994	7.436	5.236	2.071	19.07	6.305	5.262	17.52	4.122	10.52	23.01	6.388	16.84	2.036	Cct3 (-169), Tsacc (+52)	1.02752	11.4059	1.07138	0.746031
chr14	44230473	44230543	15.54	18.61	8.232	22.15	29.35	19.99	15.44	22.83	14.38	13.9	16.34	23.87	12.22	Gm8220 (-55072), Gm8212 (+32847)	0.850932	13.7694	1.46476	0.686505
chr7	47008379	47008465	18.16	3.516	1.315	13.09	6.871	5.476	17.13	6.823	11.4	18.65	13.56	8.759	0	Spty2d1 (-11)	1.01082	11.4302	1.21499	0.625991
chr11	69921573	69921637	13.7	0	4.858	17.26	7.32	2.106	11.2	4.93	13.24	24.86	8.794	7.97	0	Eif5a (-219)	0.957278	11.6668	0.252358	0.966644
chr13	12461459	12461544	12.34	4.869	4.618	14.69	6.639	5.471	18.47	3.495	14.03	21.47	7.154	13.51	0	Lgals8 (+3442), Heatr1 (+66104)	1.06566	11.4078	0.691364	0.541148
chr18	35771384	35771461	6.522	8.968	5.547	15.81	8.642	3.924	27.75	10.42	8.125	16.83	8.602	9.07	2.363	Ube2d2a (-136)	0.982443	11.464	2.265	0.446824
chr17	29660568	29660655	9.917	1.815	7.869	16.39	11.18	7.065	22.12	6.511	13.45	18.4	14.86	5.905	7.122	Ftsjd2 (+17)	1.03638	12.0231	11.9066	0.549845
chrX	94979548	94979658	21.78	16.63	10.36	17.85	14.03	11.58	16.63	8.957	11.99	10.56	19.07	5.618	4.078	Spin4 (+47079), Zxdb (+255034)	0.851712	11.427	1.43046	0.544172
chr18	22244478	22244562	5.435	7.871	3.701	11.81	3.38	3.562	45.74	1.669	5.287	3.824	2.443	13.8	1.027	Asxl3 (-100569), Ccdc178 (-73124)	1.01065	10.5283	1.44371	0.119837
chr15	89075936	89076071	4.641	1.478	5.292	16.38	5.245	7.833	30.97	4.36	14.35	14.75	11.8	11.34	3.375	Trabd (-9)	1.08147	11.7196	11.5378	0.277289
chr9	63758212	63758335	15.53	6.48	3.345	16.44	7.228	4.359	17.51	5.355	12.66	17.23	9.507	8.294	4.355	Smad3 (-280)	0.961645	11.4687	0.9029	0.864636
chr11	82781100	82781163	6.547	3.615	5.807	16.86	7.126	3.197	22.52	1.845	17.26	20.78	4.694	6.559	1.867	Lig3 (-71)	1.16651	11.3764	0.66216	0.428711
chr6	108430150	108430213	15.54	7.735	6.056	16.45	7.098	11.47	17.65	0.9665	18.14	17.04	13.03	13.99	5.241	Bhlhe40 (-230447), Itpr1 (+217064)	1.10397	10.9278	0.492643	0.479936
chr15	99875455	99875531	11.52	5.445	7.83	20.45	6.468	8.925	13.58	5.705	14.78	21.11	9.172	4.643	2.167	Lima1 (-65)	0.990978	11.7935	11.6769	0.498439
chr15	64525700	64525770	11.25	15.22	6.505	30.9	10.14	6.559	9.831	2.899	7.64	14.67	7.113	7.575	11.99	Asap1 (-142816), Adcy8 (+396561)	0.809495	10.8881	1.79486	1.90828
chr7	30729541	30729605	12.4	0.9565	5.741	12.87	1.525	5.901	19.37	2.739	19.35	21.97	16.05	8.399	0	Tmem147 (-39)	1.07448	11.8583	11.2291	0.67604
chr11	98773836	98773900	9.348	5.816	6.33	14.57	2.884	6.109	14.5	6.227	23.2	28.19	9.241	5.485	4.436	Nr1d1 (+1465), Thra (+31995)	1.06577	11.3184	0.265837	0.368632
chr2	26445133	26445243	15.67	4.363	5.096	8.548	2.597	6.826	19.58	2.348	8.929	22.77	15.49	4.554	2.802	Sec16a (+28)	1.12983	12.5593	11.2102	0.330933
chr6	113697100	113697222	11.05	11.14	4.376	18.43	5.673	6.992	15	13.34	16.95	22.07	10.31	4.826	3.574	Tatdn2 (+111)	0.92691	11.2064	1.64155	0.638657
chr11	96916453	96916553	10.28	4.726	0.3768	17.3	2.662	7.109	21.69	2.27	3.825	17.27	11.8	7.551	0.8	Cdk5rap3 (-7)	1.02483	11.7045	0.564543	0.738692
chr7	126503432	126503523	8.668	8.53	3.727	17.8	6.279	8.561	19.71	11.4	18.43	20.21	11.32	7.775	1.715	Atxn2l (-41)	0.900128	11.5613	11.5225	0.631174
chr3	58692106	58692219	11.73	4.681	4.766	9.57	6.47	4.312	23.55	9.128	6.856	21.34	7.931	5.129	1.895	Siah2 (+237)	1.14077	11.9165	0.204185	0.260215
chr9	99568876	99568963	7.456	6.488	2.87	21.45	10.81	4.511	16.88	4.369	12.43	20.37	7.631	5.212	2.461	Armc8 (-21)	1.02956	11.3575	1.76489	0.580105
chr7	4137270	4137333	10.12	3.168	1.57	13.79	4.225	4.302	22.09	1.347	16.31	20.07	7.4	4.905	5.303	Leng8 (+253)	1.08745	11.4036	0.718963	0.654702
chr10	67285269	67285347	7.731	10.2	6.422	24.39	7.803	13.22	16.03	3.146	17.37	17.79	7.989	5.11	5.068	Nrbf2 (-3)	0.826678	10.0387	1.33567	5.09806
chr11	121354400	121354558	10.18	1.906	4.73	15.92	10.42	8.193	16.43	5.816	11.51	23.38	7.162	9.396	1.668	Wdr45b (-34)	1.14833	11.9019	0.246997	0.234724
chr13	115090171	115090305	8.906	3.902	4.652	22.51	1.311	7.295	16.69	2.947	9.664	17.8	6.632	11.69	2.177	Pelo (-50)	0.911923	11.7627	11.6235	1.74696
chr1	24678529	24678595	13.38	5.157	1.546	10.95	4.624	6.261	16.9	3.97	12.18	24.59	8.184	1.551	4.753	Lmbrd1 (+18)	1.15308	11.4068	0.969368	0.384665
chr10	80398921	80399112	12.22	3.333	2.655	14.93	4.432	9.553	15.34	7.091	17.05	23.3	14.44	12.24	3.938	Mbd3 (+533)	0.933946	11.2079	0.64982	0.704559
chr6	117879485	117879622	10.08	3.655	10.19	12.18	8.471	4.508	23.24	3.838	15.34	20.27	8.425	9.996	0.2576	Hnrnpf (-27228), Zfp239 (+16477)	1.13986	11.7897	11.6127	0.322655
chr11	3122185	3122311	17.27	12.38	18.52	18.79	16.58	17.44	17.26	8.742	12.19	12.44	11.84	18.3	9.269	Sfi1 (+71159)	1.02625	12.0446	10.1201	0.153228
chr1	86487631	86487729	8.498	2.449	5.96	20.87	10.68	6.241	20.8	3.144	9.509	15.55	6.497	5.69	0	Ptma (-39056), 1700019O17Rik (+61351)	0.988016	11.689	0.442781	1.00394
chr18	6136204	6136290	11.83	2.99	1.315	11.63	6.809	4.512	22.63	6.951	19.83	19.59	9.228	7.186	0	Arhgap12 (-149)	1.00777	11.2227	1.11362	0.725641
chr10	128303705	128303769	10.09	0.6504	1.202	9.794	2.468	2.384	16.54	8.534	11.09	29.18	3.159	4.228	0.1103	Pan2 (+402)	1.10891	11.7524	0.382947	0.712763
chr6	140300594	140300657	11.57	2.721	9.646	18.3	10.79	5.524	15.59	6.619	18.65	20.07	7.233	7.546	1.096	Plekha5 (-123473), Capza3 (+259101)	1.04472	11.4505	0.111813	0.26019
chr7	90130002	90130083	10.5	2.282	3.722	19.15	14.06	9.874	12	3.986	13.05	23.86	8.42	14.09	6.1	Picalm (-189)	1.07238	11.3653	0.840557	0.352817
chr18	34954658	34954746	13.27	1.92	2.534	17.31	1.371	6.261	23.81	7.255	16.13	11.04	8.058	6.69	2.852	Hspa9 (-345)	0.98749	11.5242	0.201765	0.849893
chr1	125435655	125435804	12.77	6.245	6.776	18.41	10.36	5.308	21.22	5.709	13.61	13	13.35	8.859	0.6317	Actr3 (-3)	0.852456	11.7446	0.368714	1.42955
chr5	30869500	30869738	7.131	3.889	6.861	20.53	5.428	3.037	19.57	5.644	10.73	18.16	10.68	10.05	6.136	Tmem214 (+40)	0.915703	12.1182	11.6871	1.52585
chr1	93444900	93444963	15.52	7.871	12.16	10.77	15.32	7.17	23.86	10.02	9.493	15.24	11.9	7.981	3.175	Gm17415 (+23250), Hdlbp (+33876)	1.12359	11.6362	1.40309	0.091415
chr10	95416816	95416911	7.822	1.482	3.835	16.44	0.7845	5.394	19.51	4.525	12.44	21.6	9.704	5.466	6.266	Socs2 (-7)	0.992219	11.6542	11.6021	1.03787
chr16	87454971	87455034	15.42	1.963	3.664	15.27	9.717	1.458	21.98	10.05	10.34	12.66	16.14	5.688	6.486	Usp16 (+300)	0.961231	12.3295	0.159489	0.813575
chr9	88523057	88523259	13.34	4.97	5.2	15.07	5.78	4.355	15.37	5.773	9.596	21.51	13.83	12.53	2.807	Syncrip (-40603), Zfp949 (-24862)	1.00805	11.8856	0.174035	0.577844
chr4	135353155	135353300	8.089	4.433	1.245	17.82	12.79	7.763	20.25	0	13.52	19.13	9.053	6.935	2.001	Srrm1 (+16)	1.12986	11.0032	1.98687	0.464529
chr6	117879843	117880033	11.28	3.112	2.281	12.17	5.856	4.677	22.65	3.04	8.743	19.17	13.78	4.301	1.325	Hnrnpf (-26844), Zfp239 (+16861)	1.09674	11.9103	0.471093	0.454958
chr14	79481024	79481125	9.633	4.958	6.265	12.21	4.357	6.203	28.89	5.097	15.4	14.5	14.09	5.304	0.04659	Elf1 (-119), Wbp4 (+193)	1.10165	11.9008	11.7165	0.245098
chr11	98775280	98775439	11.01	3.604	2.252	15.65	7.555	9.259	13.43	3.702	18.34	25.14	6.718	7.532	2.417	Nr1d1 (-27)	1.01479	11.4512	0.421051	0.500093
chr11	5878300	5878403	19.69	3.911	2.028	15.24	1.551	1.912	15.75	4.478	10.87	14.54	5.845	7.615	0	Pold2 (-60)	0.915915	11.5698	0.435901	1.4275
chr1	23922303	23922478	6.639	2.344	6.335	17.52	1.947	3.995	22.14	2.214	10.17	18.87	5.906	7.909	0	Smap1 (-74)	0.988074	12.337	10.9858	1.22941
chr9	82975479	82975585	14.15	3.072	3.318	15.98	3.884	8.048	16.6	4.3	9.113	18.41	15.15	8.331	4.329	Phip (-43)	0.952428	11.5626	0.227011	0.836715
chr2	91265236	91265307	13.95	2.328	7.143	19.1	9.697	6.821	19.59	11.1	10.8	12.44	12.13	9.09	1.326	Arfgap2 (-21)	0.859794	12.2619	12.205	0.979123
chr19	56548560	56548630	13.49	6.647	5.159	16.28	7.098	6.559	13.39	3.427	12.04	21.88	4.311	5.485	0.3361	Dclre1a (-373), Nhlrc2 (+334)	1.02947	11.4456	0.674205	0.594375
chr6	28421683	28421814	8.773	3.271	1.378	15.27	6.028	6.614	22.83	3.718	16.7	18.15	9.122	6.741	2.97	Arf5 (-1811), Gcc1 (-25)	1.05258	11.3197	0.917387	0.667545
chr5	142367347	142367485	9.492	5.306	2.23	15.02	3.613	6.117	24.85	1.912	15.38	15.63	7.839	8.704	2.472	Foxk1 (-34081)	1.09766	11.2573	0.951966	0.474178
chr17	31474644	31474716	14.21	1.632	7.328	11.8	2.415	6.829	17.76	7.432	15.67	21.22	11.36	4.825	6.667	Wdr4 (+38071), Pde9a (+88446)	1.00419	11.994	10.9217	0.493345
chr11	106613070	106613164	13.43	7.008	6.715	17.41	10.42	10.62	12.29	4.004	11.21	21.81	12.07	6.691	4.589	Tex2 (-187)	1.006	11.7293	0.230987	0.381143
chr14	18238327	18238615	9.823	5.187	3.358	16.3	7.049	5.688	18.08	7.957	14.3	20.67	13.74	9.072	0.817	Nr1d2 (+656)	1.01657	11.3975	0.935444	0.598839
chr12	72761018	72761125	10.61	2.071	6.002	9.15	6.982	1.606	21.82	1.586	11.48	23.28	10.49	1.282	0	Ppm1a (-139)	1.19689	11.9372	0.0512996	0.366344
chr12	51845048	51845209	14.98	2.388	1.307	12.12	6.183	3.992	22.77	1.559	15.05	14.95	6.026	4.224	0	Hectd1 (-15593), Heatr5a (+126192)	1.02109	11.4865	0.694605	0.993516
chr2	69861518	69861589	13.86	3.449	4.379	10.85	9.722	5.048	21.17	3.638	13.81	18.91	7.459	7.957	0	Ssb (-8)	1.0794	11.626	0.785263	0.622872
chr17	47611519	47611582	8.647	4.625	3.564	17.72	8.196	5.336	31.36	6.795	25.44	7.055	9.652	17.64	0	Gm20517 (-62), Bysl (-59), Med20 (-31)	1.06991	10.5031	1.58458	0.447109
chr4	152039262	152039337	14.61	3.64	5.381	17.53	15.83	9.814	21.06	13.21	15	11.58	10.88	10.6	0.251	Tas1r1 (-732), Nol9 (-27)	0.821435	11.5714	1.11611	0.933926
chr15	76080892	76080973	12.28	4.006	2.268	15.61	4.097	8.502	21.21	4.237	14.15	15.65	9.314	5.62	3.002	Puf60 (+13)	1.03781	11.3747	0.639776	0.670566
chr5	74531735	74531806	11.57	5.57	0.7077	10.45	9.147	8.761	21.77	9.2	6.186	20.94	12.67	7.236	2.43	Fip1l1 (-3711), Scfd2 (-29)	1.1427	11.9718	1.07757	0.272324
chr11	20200997	20201388	12.09	1.938	4.98	13.16	7.534	7.735	20.24	4.186	10.7	19.21	9.805	4.62	2.612	Rab1 (-409)	1.10231	12.0219	11.6503	0.482171
chrX	107047858	107047929	36.5	13.52	1.415	10.01	4.749	2.295	14.81	1.845	0.9359	3.34	8.139	87.04	8.727	P2ry10 (-41384), Lpar4 (+127269)	1.12797	11.3472	2.60013	0.140355
chr2	24919656	24919748	12.29	3.327	4.984	12.95	5.478	5.473	20.79	6.177	11.63	18.51	8.823	1.868	7.434	Ehmt1 (-93)	1.06905	11.9627	11.7773	0.538812
chr17	46751908	46752053	9.978	1.9	2.415	8.101	3.194	5.107	27.35	3.487	10.24	19.09	4.339	2.333	1.704	Cnpy3 (+233)	1.15283	11.8686	11.4344	0.282174
chr12	24651122	24651223	7.669	3.503	4.648	22.81	9.294	6.731	15.61	6.266	17.19	18.4	6.02	12.44	3.386	Klf11 (-198)	1.00741	11.177	1.30588	0.537192
chr15	51991794	51991857	14.89	5.869	2.243	14.78	7.689	4.067	20.68	9.724	11.73	14.05	9.628	2.38	0	Rad21 (-66)	0.96926	11.7664	0.735442	0.816133
chr8	70523073	70523185	10.06	1.585	3.098	16.25	9.031	5.58	22.3	6.359	14.92	15.74	9.444	6.236	4.055	Fkbp8 (-4717), Kxd1 (+51)	0.935546	11.3475	1.0707	0.988715
chr15	68258863	68258977	9.198	7.013	8.581	17.87	7.814	3.313	20.05	5.584	15.79	17.1	15.14	6.993	4.699	Zfat (-82)	1.00416	11.7207	0.207194	0.641971
chr4	101292100	101292170	12.82	3.323	10.77	21.28	7.858	3.597	11.7	13.97	10.19	18.41	10.35	3.918	2.353	Ak4 (-127154), Jak1 (-26853)	0.936995	13.0224	11.677	0.758827
chr19	10688676	10688881	10.28	1.439	2.849	16.91	4.086	5.989	21.59	3.105	11.54	15.32	6.212	9.507	1.163	Vps37c (-36)	1.00181	11.5048	0.402392	0.845387
chr15	79328216	79328578	17.38	3.024	4.129	14.79	5.284	6.235	13.16	3.7	17.36	18.74	10.7	5.697	2.275	Pla2g6 (-433)	0.940968	11.1832	0.324507	0.949731
chr1	58652506	58652609	25.46	2.603	1.707	12.16	5.444	5.32	12.5	6.18	7.222	13.91	8.247	8.964	1.896	Gm10068 (+5950), Als2cr12 (+43431)	0.965763	12.031	11.9432	0.594752
chr10	7792804	7792874	14.57	3.288	3.096	23.79	4.107	7.913	14.27	6.432	16.62	11.37	11.68	3.657	3.518	Ppil4 (-52), 6530403G13Rik (-17)	0.813283	10.9869	0.794284	2.16259
chr7	4659042	4659169	8.715	5.119	6.652	21.15	7.126	5.609	17.11	3.865	15.19	16.98	8.352	7.515	2.155	Ppp6r1 (-156)	1.04566	11.1529	1.5935	0.823768
chr11	59191831	59191959	17.66	1.703	3.508	14.07	5.739	7.313	19.81	1.11	9.661	12.4	8.511	6.642	0	Guk1 (+57)	0.991268	11.7693	11.705	0.944245
chr17	35241681	35241785	11.55	4.297	8.983	27.25	9.606	6.793	12.17	6.6	17.17	12.95	15.06	9.177	1.508	Ddx39b (-137)	0.829076	10.7511	1.06098	1.26582
chr14	20228482	20228561	5.979	6.044	1.63	19.77	3.526	8.624	18.38	4.741	12.27	19.76	9.76	2.962	2.879	Kcnk5 (-46740), Kcnk16 (+40640)	0.928158	11.5551	0.309462	1.45723
chr12	3868697	3868761	14.46	2.449	3.582	8.337	0.08318	1.782	13.07	2.97	8.458	28.01	3.277	3.885	0.4779	Pomc (-86222), Dnmt3a (+61699)	1.17515	11.785	11.5507	0.530024
chr12	59131293	59131433	13.3	2.37	5.664	19.57	4.309	7.151	15.43	4.903	9.666	15.57	13.37	9.769	1.613	Ctage5 (+1600), Fbxo33 (+88362)	0.920953	11.8809	0.046194	0.995831
chr7	73558546	73558609	3.599	4.606	4.686	19.53	6.225	8.087	22.05	3.222	11.71	18.68	6.778	13.15	3.523	Fam174b (-181729), Chd2 (-16832)	0.999507	11.4307	0.711629	0.837616
chr10	61648436	61648590	11.59	2.671	6.097	9.671	6.844	5.097	26.61	3.115	7.914	15.98	7.603	4.013	3.31	Ppa1 (-39)	1.12331	11.9899	11.6011	0.263332
chr16	17132377	17132613	10.51	1.997	4.291	13.14	5.196	5.817	22.47	1.947	7.808	17.73	4.789	2.913	1.037	Sdf2l1 (-112)	1.10371	11.9036	11.6883	0.51127
chr1	151755324	151755389	10.8	2.882	3.527	9.823	3.986	2.392	26.07	7.352	9.849	17.15	5.13	8.41	0	Edem3 (-17)	1.09006	11.744	0.160666	0.395685
chr8	40669579	40669643	12.67	1.224	6.158	10.44	2.329	7.081	16.11	3.777	12.79	24.57	10.56	11.46	0	Mtmr7 (-34835), Adam24 (-5483)	1.16213	12.0004	10.714	0.312468
chr8	84661698	84661770	11.11	3.979	3.926	13.89	4.929	5.801	21.03	10.87	10.04	17.74	11.53	9.853	2.723	Ier2 (+1118), Cacna1a (+246370)	1.03413	12.2032	12.153	0.494458
chr17	25579061	25579132	12.62	4.76	1.305	23.24	10.32	2.941	10.8	4.548	5.593	17.1	2.274	10.15	3.955	Lmf1 (-80)	0.904862	11.3725	1.23398	1.49971
chr11	101551903	101551989	9.739	2.278	0	11.55	8.666	3.909	27.16	0.6222	5.239	15.31	7.807	4.337	1.167	Nbr1 (-203), Brca1 (-67)	1.10275	11.5716	1.00071	0.461516
chr18	38185231	38185307	11.48	4.833	6.219	16.9	12.3	5.184	19.34	6.579	13.35	15.97	9.112	4.402	1.837	Arap3 (-187695), Pcdh1 (+24493)	1.01906	11.7261	0.632658	0.669604
chr2	35979779	35979842	15.04	3.965	2.991	13.01	8.788	3.808	25.09	0.6443	11.5	10.46	8.622	10.27	0.4482	Ttll11 (-187)	1.03219	11.3429	0.84009	0.697348
chr15	36609060	36609182	10.58	2.529	3.938	15.35	5.411	6.871	24.41	8.258	18.36	13.23	7.668	9.082	0	Pabpc1 (-148)	1.03227	11.3595	0.276477	0.529137
chr9	36767843	36767993	10.41	2.783	2.094	13.52	3.703	4.601	22.12	2.829	12.77	17.5	15.32	4.888	0	Stt3a (-239)	1.06732	11.7004	0.381843	0.58322
chr17	71598781	71598866	11.78	2.074	5.93	11.05	11.11	8.468	22.53	2.844	10.07	18.15	16.08	4.711	3.958	Wdr43 (-17391), Spdya (+46763)	1.13581	12.1941	12.0546	0.186276
chr2	42558456	42558523	15.88	10.87	5.39	18.21	9.27	4.952	23.41	6.554	14.8	5.993	10.47	21.86	9.306	Lrp1b (+95108)	1.02425	12.9106	0.787666	0.40358
chr5	90366597	90366660	4.723	4.256	7.377	14.82	8.056	9.215	22.34	4.774	19.99	21.58	11.57	8.59	8.939	Gm9958 (-575), Ankrd17 (-444)	1.19938	11.5526	11.477	0.299966
chr1	43933880	43934063	8.164	2.114	3.115	12.64	5.847	6.304	22.54	10.45	9.928	20.09	7.429	3.457	3.669	Tpp2 (-30)	1.07293	12.0097	11.9352	0.398771
chr4	133672611	133672688	12.96	6.774	4.935	11.44	7.144	8.213	23.62	9.01	13.37	15.4	20.05	9.213	0	Pigv (-3)	1.07742	12.1432	1.06784	0.260827
chr10	88731333	88731397	11.36	5.605	1.742	11.51	7.181	8.886	23.75	6.227	2.735	16.72	10.47	8.085	10.85	Arl1 (+297)	1.12255	12.0917	0.506422	0.330982
chr19	7494364	7494467	11.46	5.813	5.61	14.82	8.201	2.459	15.65	10.55	5.838	21.27	9.492	10.81	0	Atl3 (-22)	1.02523	11.7026	0.772006	0.630185
chr4	9669186	9669431	13.12	2.739	3.192	13.59	3.788	3.645	18.23	3.916	7.832	18.23	10.31	4.045	0.8003	Asph (-147)	1.04085	11.9948	11.9727	0.758381
chr11	58938814	58938948	14.03	3.801	4.008	12.18	6.913	8.046	17.96	4.874	10.18	18.98	10.09	7.941	1.288	Rnf187 (+35)	1.09293	11.8868	0.154305	0.389472
chr10	13964558	13964685	8.058	6.093	5.255	13.88	5.561	9.563	20.32	7.715	12.81	20.84	12.34	3.844	5.089	Hivep2 (-1757)	1.11226	11.5484	1.15365	0.28152
chr19	5803547	5803617	11.72	9.777	9.69	19.43	9.151	8.4	15.51	4.85	19.98	16.33	17.44	8.933	3.137	Scyl1 (-32181), Frmd8 (+71692)	1.06315	10.7615	0.311582	0.482376
chr2	163540761	163540838	13.7	3.673	3.406	10.09	4.586	10.79	12.42	5.08	19.47	26.75	6.094	6.53	3.901	Hnf4a (-6388), R3hdml (+48482)	0.830905	11.3145	0.461431	0.921879
chr17	86532993	86533103	19.05	5.832	1.142	8.936	9.824	7.998	16.97	8.387	12.69	17.96	7.187	5.884	2.381	Epas1 (-220859), Gm10309 (-27816)	1.11083	10.6962	3.14821	0.158452
chr1	151755136	151755229	13.7	2.172	4.322	13.09	3.206	5.319	14.24	2.559	12.25	21.85	4.932	6.035	0.8433	Edem3 (-191)	1.02964	11.5354	0.12721	0.779051
chr1	170174825	170175277	10.57	6.244	3.929	17.68	7.432	4.145	17.69	3.894	12.42	16.86	10.62	6.812	0.5986	Uap1 (-105)	1.00766	11.4006	0.992986	0.758373
chr19	6057763	6057935	8.357	4.677	1.461	16.41	5.942	6.269	22.21	4.548	9.96	15.79	11.68	10.7	1.345	Znhit2 (-3343), Fau (-118), Mrpl49 (-98)	1.01377	11.4379	1.09121	0.630978
chr6	124931316	124931379	10.3	4.431	5.433	17.56	6.957	3.644	23.99	7.556	12.14	10.82	10.39	4.556	1.805	Mlf2 (-40)	1.0105	11.8717	0.293158	0.564512
chr1	156658758	156658902	15.22	2.942	4.296	9.281	1.996	4.402	17.8	4.023	8.239	20.34	2.494	4.825	0.8715	Tor3a (+15526), Abl2 (+99781)	1.10551	11.9823	11.6656	0.480588
chr6	108660367	108660473	10.8	2.957	3.792	16.12	5.893	4.834	18.94	0.9226	12.83	16.74	7.914	4.174	0	Bhlhe40 (-209)	1.06711	11.5421	0.431674	0.713804
chr9	44881393	44881552	13.29	5.737	2.015	16.5	9.732	10	17.7	6.359	13.03	15.02	9.205	11.59	5.406	Mll1 (-199)	0.940975	10.9483	1.67748	0.611526
chr19	4397414	4397489	6.172	5.028	3.957	18.06	11.19	9.775	21.74	4.133	10.89	16.53	8.127	4.876	2.688	Kdm2a (-375)	1.08348	11.3057	1.25022	0.467319
chr13	113618653	113618723	3.846	9.952	9.825	21.42	7.529	7.744	23.49	8.988	10.97	13.74	5.001	14.73	10.36	Snx18 (-124)	1.14864	10.7459	3.56759	0.289489
chr3	93553508	93553580	15.52	2.449	2.268	11.98	0.9858	1.07	17.6	2.563	11.34	17.38	3.73	6.755	3.246	S100a10 (-1536)	0.995467	11.6605	0.450007	1.20097
chr6	54429491	54429571	10.59	8.938	3.16	17.29	4.237	4.739	19.78	8.303	20.16	14.8	4.545	8.09	2.333	Wipf3 (-72)	0.989892	10.8345	1.3686	0.65765
chr4	33247843	33247945	12.05	2.449	3.187	12.43	5.028	5.474	21.46	2.388	17.14	16.48	9.408	7.959	2.007	Pnrc1 (+616)	1.05629	11.4888	0.383381	0.641859
chr6	138140081	138140142	20.85	2.991	4.273	8.068	3.462	5.973	13.73	7.108	20.62	19.75	4.032	5.185	0.4629	Mgst1 (-204)	1.1751	10.6954	1.6566	0.225962
chr3	95016188	95016259	6.697	2.414	5.662	20.25	7.198	6.508	15.83	3.43	8.332	19.6	6.779	6.155	1.767	Zfp687 (-986)	1.03994	11.8872	0.282153	0.641357
chr18	64661046	64661113	12.67	6.286	6.093	9.993	5.986	7.206	16.49	9.639	10.3	23.22	12.7	6.195	1.779	Atp8b1 (-80)	1.17059	12.2882	11.8153	0.169107
chr10	21295946	21296023	10.49	3.371	5.853	12.31	6.937	3.558	24.79	2.971	16.23	14.77	6.662	12.23	0	Hbs1l (+6)	1.10375	11.3402	0.504632	0.381958
chr14	65374960	65375036	8.866	6.734	5.372	21.64	4.81	5.885	16.24	6.749	12.75	15.58	14.61	8.131	3.612	Zfp395 (+16322), Pnoc (+50474)	0.841197	11.5274	0.283865	1.70558
chr16	96145231	96145300	15.31	2.254	8.443	9.816	4.063	6.525	25.66	5.562	11.56	11.53	6.735	7.737	2.535	Wrb (-141)	1.039	12.1581	11.0627	0.471381
chr1	131275348	131275496	9.212	2.217	4.329	9.888	8.657	7.645	30.17	5.486	16.32	13.02	9.501	6.202	0	Rassf5 (-30164), Ikbke (+4184)	1.13786	11.4821	11.393	0.205617
chr9	104063106	104063289	11.52	3.472	4.359	17.08	7.534	6.563	15.11	3.64	6.678	18.58	10.56	2.468	5.833	Acad11 (-488), Uba5 (-64)	1.03831	12.1907	12.0922	0.533189
chr10	40077728	40077800	16.05	2.109	4.056	10.14	8.725	3.209	13.64	7.381	11.98	22.41	2.179	4.469	2.288	AI317395 (-52496), Slc16a10 (+64490)	1.16887	11.0619	1.9452	0.321316
chr10	80039695	80039771	11.68	3.625	6.735	15.15	5.51	2.163	19.87	9.857	4.819	15.53	9.668	7.674	1.29	Polr2e (+62)	0.976217	13.7281	11.6071	0.513534
chr10	80039695	80039771	11.68	3.625	6.735	15.15	5.51	2.163	19.87	9.857	4.819	15.53	9.668	7.674	1.29	Polr2e (+62)	1.07271	11.4326	1.34826	0.204823
chr9	96478574	96478710	5.302	2.269	4.457	18.13	8.116	6.273	24.9	5.563	8.866	13.65	11.4	5.539	1.903	Rnf7 (+33)	0.994715	11.7892	0.54998	0.653827
chr14	75845032	75845232	14.58	4.102	2.921	15.81	7.293	6.961	15.82	4.281	15.53	15.74	6.322	8.867	2.157	Tpt1 (+39)	0.979522	11.0439	1.01158	0.820267
chr2	172440517	172440582	14.82	0.8665	2.053	15.9	3.139	6.106	21.45	2.782	14.31	9.711	9.262	13.75	3.053	Rtfdc1 (-6)	0.971128	11.3565	0.320791	0.995441
chr3	27710421	27710548	16.69	1.976	1.953	9.494	3.186	5.912	18.08	1.7	4.977	17.6	8.649	7.443	0.8646	Fndc3b (-46)	1.02935	12.0581	11.661	0.766521
chr8	54529976	54530088	13.64	3.083	1.654	12.63	6.242	9.309	24.11	8.237	10.71	11.41	14.15	6.758	2.815	Spcs3 (-34)	1.01499	11.9587	0.40683	0.497493
chr8	70698736	70698824	8.695	4.536	4.033	27.79	7.783	10.17	15.69	2.684	11.79	9.592	15.98	26.43	0	Jund (+1041), Gm11175 (+1300)	0.828024	10.8643	1.03247	1.78644
chr19	10689285	10689398	7.426	2.34	5.642	12.5	3.942	2.792	27.92	7.136	4.331	13.83	6.075	4.191	0	Vps37c (+527)	1.05347	12.3264	11.8894	0.327651
chr10	121626484	121626606	7.614	4.657	2.703	12.67	6.836	8.036	22.8	3.418	11.4	18.58	6.629	9.771	2.456	Xpot (-229)	1.14261	11.4239	1.03559	0.260856
chr13	74350198	74350343	14.65	2.702	3.476	12.78	11.34	5.556	21.24	2.812	9.601	12.91	12.67	4.464	1.363	Ccdc127 (-38), Sdha (+9)	1.02936	11.7671	0.4875	0.646516
chr9	82975731	82975794	13.39	5.558	5.234	9.929	13.01	8.745	21.43	9.46	6.251	16.78	13.91	12.48	0	Phip (-274)	1.06638	11.7312	1.78842	0.131064
chr11	88047524	88047662	9.537	5.519	7.214	13.8	8.77	8.478	18.83	8.37	13.76	19.27	9.097	6.73	1.398	Srsf1 (+220)	1.07108	11.6156	0.416277	0.294124
chr18	76929984	76930089	12.56	7.405	3.574	17.93	7.909	9.902	16.05	4.393	10.79	14.89	8.622	5.293	6.708	Ier3ip1 (+20)	0.988507	10.6674	2.1497	1.2636
chr13	52974832	52974903	13.81	2.845	5.949	11.25	6.848	7.927	9.943	8.55	11.94	26.38	3.358	7.622	3.038	Auh (-45207), Nfil3 (+6205)	0.944142	10.5293	0.456517	0.84853
chr1	151344485	151344571	10.14	6.051	7.175	18.64	2.744	3.909	9.45	5.256	14.87	23.15	13.53	4.358	0	Ivns1abp (+30)	0.958695	11.674	0.284964	0.637613
chr11	72582209	72582273	8.954	4.285	5.594	10.83	2.8	5.577	14.7	6.487	10.56	26.79	8.487	3.828	0	Spns3 (-31735), Ube2g1 (-25042)	1.15712	12.1566	11.4402	0.329157
chr9	107612792	107612855	16.22	8.435	8.823	10.77	7.577	6.394	15.31	9.46	17.26	18.97	5.221	7.517	0	Sema3b (-5775), Gnai2 (+22518)	1.10741	10.6806	1.92476	0.0799901
chr4	33261377	33261492	16.21	2.555	2.185	9.268	6.62	4.842	16.92	4.284	12.51	18.87	5.025	10.21	1.964	Rngtt (-48876), Pnrc1 (-12925)	1.19082	10.643	2.46396	0.208414
chr12	80790409	80790520	9.702	2.702	6.535	17.16	8.713	6.858	14.73	4.372	9.753	19.63	10.81	5.798	2.275	4933426M11Rik (-67)	1.04573	12.1028	11.9548	0.433095
chr3	113568198	113568346	14.81	2.697	3.162	12.74	7.194	3.663	18.9	2.992	7.446	14.74	7.055	2.421	3.116	Amy2a1 (-35844), Amy1 (+9558)	1.03214	11.8631	0.312127	0.840207
chr2	31460520	31460584	10.48	5.051	4.024	9.713	5.49	14.53	14.65	7.611	25.27	26.32	6.884	9.427	0	Ass1 (-9655), Hmcn2 (+146137)	1.01563	11.214	0.284873	0.449955
chr11	102407523	102407752	13.21	5.101	6.274	13.45	4.386	6.797	13.57	5.334	13.5	20.87	9.297	9.333	0.00685	Slc25a39 (-94)	1.01718	11.5755	0.0647319	0.518923
chr9	61031898	61031993	16.17	4.936	8.099	10.63	1.569	4.958	12.21	2.467	12.5	22.08	6.925	6.39	0.1156	Gm9869 (-193746), Gm10655 (+340247)	1.08356	11.8775	11.0275	0.460333
chr4	34882949	34883198	15.93	2.36	3.456	15.64	4.055	7.548	15.81	5.165	14.89	13.61	7.962	7.152	0.0819	Zfp292 (-114)	0.926207	11.2954	0.379928	1.0409
chr17	32483304	32483434	11.41	8.985	1.812	11.12	4.068	12.85	23.53	3.832	11.47	14.91	7.846	6.666	3.97	Cyp4f17 (-23093), Cyp4f39 (+14907)	1.08517	11.7568	0.276668	0.195264
chr10	127352293	127352432	14.97	5.567	6.066	16.61	8.63	4.337	12.88	2.389	15.32	16.49	10.3	7.156	2.438	Inhbe (-591)	0.991951	11.0323	0.420111	0.62736
chr5	24445206	24445270	16.53	0.8418	4.858	8.499	9.15	5.554	18.5	11.13	14.43	17.39	12.21	8.742	3.186	Fastk (+49)	0.92424	11.7405	0.888205	0.679298
chr12	15653670	15653738	8.844	0.9003	2.679	9.408	0	12.24	20.07	0	5.577	22.57	7.855	6.507	0	Trib2 (+163081)	1.11347	12.6918	10.5096	0.509667
chr7	34234175	34234266	5.19	3.081	3.33	20.17	8.716	8.642	14.92	7.685	12.08	20.6	12.67	13.98	6.619	Gpi1 (-3940)	0.971581	11.5309	1.03554	0.645899
chr5	65764418	65764497	12.73	1.906	2.544	20.61	12.96	1.968	13.62	7.637	17.21	13.88	4.202	8.285	4.279	N4bp2 (+937)	0.979818	10.565	2.5836	0.42409
chr18	67774861	67774929	8.543	2.971	7.181	15.86	4.775	4.029	21.41	4.477	11.61	15	12.54	4.947	0.323	Seh1l (+19)	0.986743	12.4879	11.1662	0.870254
chr3	62339893	62339968	12.83	10.25	7.118	16.58	6.175	9.735	17.75	5.855	17.14	13.65	11.53	6.314	6.013	Arhgef26 (+1587), Dhx36 (+167073)	1.04277	10.9139	1.15642	0.441499
chr11	107479415	107479478	12.22	6.608	4.337	13.2	10.31	8.628	14.05	2.46	16.49	21.31	8.574	9.055	2.365	Psmd12 (-37)	1.1012	10.7803	0.908079	0.240704
chr16	22439597	22439669	12.51	5.833	3.773	17.11	5.989	3.97	16.99	5.843	17.17	14.16	7.46	13.31	0	Etv5 (+86)	0.924469	10.8524	1.57661	0.97405
chr4	45342017	45342115	8.755	5.597	8.236	16.51	12.73	6.226	16.77	4.368	13.4	18.71	4.142	11.77	2.121	Dcaf10 (-35)	1.06137	11.2439	1.83084	0.41994
chr11	88864569	88864660	4.221	3.498	1.95	16.99	6.513	2.832	17.93	1.034	12.4	21.59	6.499	3.878	3.301	Akap1 (-29)	1.11104	11.1364	1.4854	0.75319
chr7	24399563	24399651	15.31	4.564	0.91	10.99	3.63	5.032	19.01	2.013	16	15.39	6.652	10.43	0	Smg9 (-12)	1.16139	10.4319	2.03409	0.232312
chr8	119558456	119558519	5.123	3.673	7.128	13.46	2.45	7.029	20.94	1.992	10.42	21.14	11.47	9.49	2.726	Mbtps1 (+273)	1.0861	13.1232	10.2551	0.494274
chr15	102186369	102186432	6.572	5.617	4.461	17.95	4.45	8.416	21.49	3.485	15.2	14.61	3.281	10.3	5.092	Csad (+2642), Soat2 (+35875)	1.05613	10.9197	1.38718	0.542961
chr1	156657669	156657856	14.45	2.108	2.318	12.04	2.325	8.775	16.39	2.694	15.83	17.71	6.866	3.627	0.994	Tor3a (+16593), Abl2 (+98714)	1.0876	11.2717	0.255258	0.53005
chr5	134184141	134184204	8.422	4.878	2.667	12.97	7.38	10.46	21.79	5.184	3.936	17.4	6.538	7.226	3.697	Gtf2ird2 (+146)	1.14268	12.116	0.176951	0.277608
chr2	31974395	31974463	7.663	7.508	7.805	25.27	7.124	11.8	20.07	1.628	10.13	7.525	7.588	4.786	6.413	Nup214 (-7)	0.919209	11.0916	0.911991	1.18943
chr7	98392602	98392735	8.085	5.045	3.908	13.34	8.859	6.915	12.7	4.62	12.75	26.29	9.779	4.756	4.924	Gucy2d (-50752), Tsku (-31381)	1.10259	11.6352	0.73462	0.274672
chr2	103797157	103797226	9.515	6.406	6.895	20.89	15.04	14.34	16.71	7.193	11.02	13.29	10.74	11.34	4.41	Caprin1 (+457)	0.933803	11.1563	1.26783	0.471032
chr3	98255043	98255106	10.45	8.26	6.281	13.18	4	7.17	14.65	4.803	14.89	22.11	10.73	5.862	0	Hmgcs2 (-25360), Reg4 (+32919)	1.08479	11.3564	0.572673	0.311336
chr15	76697983	76698064	9.407	2.434	2.791	12.31	7.667	7.314	9.594	2.734	17.27	29.07	8.42	2.889	0	Mfsd3 (-3518)	1.05077	11.4349	0.44517	0.456537
chr4	40205699	40205783	11.55	4.635	6.412	17.81	5.83	3.385	9.04	3.317	21.05	21.92	8.46	4.44	5.63	Ddx58 (+34087), Aco1 (+62660)	0.976653	10.9609	0.789277	0.68693
chr13	38528436	38528546	8.874	2.404	3.883	18.27	4.872	4.335	21.25	8.051	14.79	11.92	11	12.2	0.1569	Txndc5 (-1)	0.918577	13.0451	11.295	0.838482
chr1	172632925	172633047	10.53	1.505	2.51	12.54	3.04	7.721	20.07	4.976	13.7	17.14	7.21	4.541	0	Dusp23 (-12)	1.06132	11.6744	11.6665	0.614224
chr2	65238590	65238742	9.177	6.605	3.182	15.85	7.565	7.697	11.41	5.317	14.56	23.84	9.847	6.351	4.53	Cobll1 (-40)	0.984358	11.276	1.26577	0.527463
chr1	128244086	128244231	12.28	1.858	3.173	14.58	7.379	4.29	14.79	6.439	12.02	18.62	8.21	4.148	2.018	Ubxn4 (-22)	0.991254	11.7386	0.391376	0.694291
chr11	85140073	85140191	11.75	2.542	2.621	20.73	7.775	3.979	9.713	4.097	10.97	18.06	10.04	5.237	1.329	Usp32 (-94)	0.900085	11.5814	0.805012	1.14382
chr8	13159129	13159250	11.02	1.649	5.372	11.2	6.379	5.104	16.95	4.91	7.353	21.04	7.17	4.578	7.13	Lamp1 (+55)	1.13458	12.1226	11.8353	0.431963
chr1	74391395	74391537	16.59	1.94	1.05	14.24	10.31	6.894	13.86	6.224	17.58	15.52	6.758	8.961	0.02762	Ctdsp1 (-43)	0.981912	10.8426	1.78569	0.433888
chr19	12794832	12794900	11.53	4.177	3.371	18.02	9.238	11.59	16.05	8.683	17.92	14.61	3.151	5.646	0	Lpxn (-3740), Zfp91 (+1260)	0.879354	10.4212	1.34628	1.42878
chr11	5955626	5955749	7.501	3.972	3.204	19.22	5.222	5.503	17.57	9.106	10.44	15.91	8.194	5.886	2.015	Ykt6 (-5)	0.832933	12.102	11.7798	1.87703
chr8	55379406	55379481	8.565	7.803	8.709	22.88	14.31	5.193	14.06	12.87	4.452	14.59	9.837	9.922	10.93	Gpm6a (+424716), Adam29 (+527504)	0.88146	12.5959	0.106281	1.15242
chr1	93132875	93132964	17.02	1.224	0.7939	12.88	3.07	3.844	14.98	3.918	12.71	15.19	6.578	7.19	0	Agxt (-2325)	0.91187	11.2432	0.886581	1.39228
chr5	111330562	111330728	8.744	2.463	4.975	13.97	8.381	6.995	15.68	4.268	9.939	21.67	9.562	8.239	0	Pitpnb (-118)	1.10773	11.9866	0.0252766	0.294946
chr6	35449351	35449424	5.392	13.15	11.96	25.3	10.28	6.086	11.02	11.85	17.76	18.34	11.18	6.913	2.933	Fam180a (-123247), Mtpn (+90500)	0.85154	10.7479	2.06399	0.743523
chr9	98563656	98563737	11.78	1.481	1.066	12.02	4.403	3.328	21.55	6.128	7.743	14.69	11.68	5.327	2.76	4930579K19Rik (-86), Copb2 (-34)	1.02728	12.012	0.16594	0.72206
chr9	20878062	20878181	9.115	6.163	5.304	15.64	12.73	5.899	17.89	9.675	16.47	17.36	12.08	8.005	1.351	Angptl6 (+1605), A230050P20Rik (+9480)	1.04059	11.4018	1.27178	0.36295
chr6	71831299	71831371	10.89	1.905	7.742	23.4	11.95	7.508	13.27	2.178	22.94	12.42	7.607	6.018	1.688	Immt (+4)	1.04118	10.2211	1.05247	0.260439
chr16	32608800	32608879	13.63	0.7594	3.955	10.16	7.592	6.543	25.71	2.476	7.734	10.35	3.801	12.15	1.588	Tfrc (-80)	1.07652	11.5475	11.3948	0.459371
chr7	47008254	47008322	8.242	5.186	3.787	11.39	10.75	6.098	26.35	9.551	14.2	13.84	13	6.345	2.791	Spty2d1 (+123)	1.08044	11.3889	1.34015	0.25107
chr13	38037178	38037239	12.8	2.449	3.655	9.087	6.371	5.851	19.96	6.322	10.84	17.97	4.081	8.422	3.24	Cage1 (-286), Riok1 (+220)	1.09729	11.7285	0.266274	0.505226
chr7	141562187	141562257	9.559	8.955	2.4	19.5	5.07	9.436	19.46	6.616	6.413	11.29	14.42	8.045	5.513	Ap2a2 (+42)	0.921356	10.6529	1.95652	0.88641
chr5	88720798	88720879	8.824	3.734	3.082	17.91	5.893	5.43	14.21	5.148	11.02	18.86	8.271	4.266	2.992	Mob1b (-32)	1.03482	11.8576	0.525284	0.49938
chr11	5021282	5021343	21.52	13.03	13.31	11.85	19.08	10.05	14.37	20.72	12.54	12.06	12.89	20.44	4.243	Rasl10a (-36815), Ap1b1 (+34489)	0.966624	13.3386	2.46394	0.348346
chr10	94147872	94147965	12.53	5.437	4.93	14.87	9.464	5.399	19.47	6.071	20.69	12.87	6.668	6.822	4.116	Nr2c1 (-104)	1.025	10.6951	1.49285	0.586185
chr11	98783499	98783566	16.78	2.54	6.257	11.64	5.827	10.68	15.16	5.535	11.93	16.11	5.292	9.988	0.01171	Msl1 (-11983), Nr1d1 (-8200)	1.08049	12.0334	11.0151	0.295992
chr7	67372868	67372949	5.909	3.522	3.683	9.066	6.309	4.754	25.15	9.841	11.54	19.48	14.55	13.57	5.848	Mef2a (-51)	1.1169	11.8393	0.649465	0.131009
chr10	80168227	80168292	13.9	4.163	6.136	16.48	7.535	6.129	18.93	7.295	14.54	10.29	11.75	6.329	6.745	1600002K03Rik (-4684), Cirbp (+482)	0.952207	11.7306	0.129318	0.664107
chr11	74830437	74830550	11.69	2.806	6.573	15.23	2.497	6.016	14.21	4.997	14.74	18.36	8.439	9.773	1.388	Mnt (-426)	0.979921	11.6937	11.4346	0.681583
chr14	52257941	52258045	6.509	1.954	4.273	10.72	5.886	3.09	12.17	5.234	13.93	30.02	12.38	5.591	2.413	Tox4 (-21153), Chd8 (-20421)	1.13923	11.7791	0.228832	0.263986
chr5	137502393	137502522	12.25	1.927	0.2921	10.63	8.336	4.719	18.23	2.846	10.65	18.3	6.866	5.499	0	Pop7 (-33)	1.12074	11.6632	0.492284	0.641221
chr4	132212192	132212357	11.14	7.814	7.09	17.42	11.7	10.07	15.54	5.446	16.17	15.27	9.949	7.601	4.083	Ythdf2 (+28)	1.13403	10.7845	2.18068	0.362999
chr4	44072611	44072840	11.14	2.497	4.573	10.37	6.013	4.23	16.41	7.139	13.39	21.39	7.551	7.96	2.737	Gne (+11451), Clta (+60048)	1.0701	11.5549	0.557545	0.462955
chr1	134494549	134494732	10.86	2.188	5.037	17.02	7.699	5.115	18.18	2.43	13.33	13.23	5.607	4.356	1.35	Rabif (-19)	1.00109	11.6213	0.291341	0.994208
chr3	121263371	121263435	13.92	1.97	5.103	11.74	6.072	10.46	17.24	2.681	12.28	16.37	13.49	9.827	0	Tmem56 (-244)	1.04081	11.9353	11.2115	0.519948
chr11	74830782	74830951	8.775	5.463	9.291	21.3	7.371	13.18	14.42	3.177	10.53	14.77	10.97	5.604	3.328	Mnt (-53)	0.998557	11.7441	11.7285	0.411145
chr15	75216985	75217079	10.45	2.722	2.572	15.89	1.774	7.72	19.82	1.767	14.86	13.05	2.857	6.963	0	BC025446 (+440)	1.04664	11.2355	0.533802	0.754043
chr10	80755004	80755136	13.6	0.7606	6.59	17.07	6.211	8.998	15.57	5.899	10.76	12.96	7.521	9.225	3.387	Dot1l (-136)	0.884539	11.7353	11.5805	1.16759
chr1	87755919	87755994	11.04	4.816	4.166	9.29	9.322	3.337	24.22	4.773	15.73	14.62	9.817	9.069	0.7948	Atg16l1 (-129)	1.10688	11.2617	1.11143	0.36492
chr6	24664988	24665109	6.167	5.798	1.713	22.22	6.702	6.695	16.4	2.196	7.072	14.31	6.634	7.585	3.021	Wasl (-40)	0.92785	11.3962	1.09624	1.43822
chr1	178318716	178318822	14.59	2.264	3.526	12.12	7.265	2.822	13.81	2.959	20.4	18.5	9.622	7.141	1.539	Cox20 (-361)	1.04755	10.637	1.87472	0.806276
chr18	75448201	75448355	11.82	4.683	5.883	17.16	5.98	6.617	11.93	4.96	13.97	18.11	5.506	4.998	5.149	Smad7 (+80749), Ctif (+249418)	0.979068	11.5536	0.291129	0.621506
chr17	5189801	5189993	6.552	2.914	4.4	14.14	7.163	11.32	19.61	5.199	14.97	18.69	8.173	9.427	3.75	Arid1b (+194823), Tmem242 (+250363)	1.12874	11.41	0.587311	0.322655
chr17	80373457	80373566	10.75	2.415	2.723	10.17	7.244	4.362	15.35	5.485	7.36	22.68	7.779	7.733	3.368	Arhgef33 (+66105), Sos1 (+106941)	1.14389	11.6452	0.979244	0.368168
chr13	17805036	17805100	12.45	6.084	7.753	8.175	4.103	8.238	17.17	8.707	7.394	21.13	7.214	5.485	0.5147	Cdk13 (+29)	1.19918	12.3784	10.9386	0.25032
chr2	160339737	160339822	9.613	5.834	3.307	11.46	4.655	2.997	15.06	7.771	18.3	22.76	12.25	7.593	1.938	Gm826 (-12286), Mafb (+27285)	1.03349	11.0608	0.909331	0.380132
chr5	31193081	31193182	11.35	2.97	3.685	18.12	7.326	4.311	19.12	9.171	9.323	10.3	7.918	2.733	0	Eif2b4 (-118), Snx17 (-95)	0.95317	12.0601	0.164667	0.79646
chr3	97768284	97768351	20.11	2.12	3.07	9.665	2.437	2.608	16.95	3.139	11.2	12.15	6.666	4.339	1.908	Pde4dip (-309)	0.974357	11.8932	11.8219	1.13228
chr17	56584725	56585009	11.05	2.94	1.863	16.97	6.979	6.065	16.97	3.365	13.8	13.87	14.04	5.903	3.899	Safb2 (-282), Safb (-192)	0.960203	11.3799	0.760813	0.965837
chr9	44965562	44965640	13	0	0.765	12.62	4.277	10.6	19.38	2.933	13.63	13.79	6.345	2.344	2.011	Ube4a (-41)	1.05674	11.4314	0.296963	0.823636
chr8	31168818	31168881	9.946	7.113	2.592	12.87	8.703	7.969	19.96	4.247	11.78	16.01	6.682	2.119	1.307	Mak16 (-126)	1.14304	11.0978	1.6041	0.361814
chr6	121151951	121152039	10.54	6.553	5.781	12.14	6.553	4.14	14.02	10.27	17.68	22.07	10.63	14.71	1.292	Mical3 (-70386), Pex26 (-31672)	1.00768	11.1668	1.11673	0.392389
chr2	27599243	27599313	11.88	3.796	3.208	16.91	3.574	11.72	16.63	3.743	13.13	13.31	8.902	7.914	7.955	Rxra (-77923), Wdr5 (+84121)	0.963989	10.9521	0.992712	0.963801
chr8	72146241	72146305	9.717	4.725	6.943	10.14	2.19	3.865	15.96	6.689	18.64	22.91	6.507	10.54	3.885	Rab8a (-14927), Tpm4 (+11014)	1.10076	11.5054	11.1023	0.24536
chr7	46830025	46830089	13.63	7.824	1.227	11.7	3.299	4.258	10.81	4.728	14.38	22.47	6.648	5.914	0.9804	Ldha (-17074), Gtf2h1 (+33954)	0.966937	10.8191	1.57988	0.995871
chr12	12793506	12793587	17.43	2.086	1.977	13.93	4.009	7.259	11.16	1.549	10.36	16.07	12.48	7.02	3.118	Rpl36-ps3 (-118439), Fam49a (+531408)	0.8719	11.2669	0.457525	1.29834
chr11	29172816	29172956	17.88	2.449	3.993	9.602	8.112	6.305	19.95	3.4	11.37	11.15	7.501	5.407	1.793	Smek2 (-4)	0.984915	11.7987	0.253996	0.877639
chr14	55745658	55745728	4.498	0.8046	7.088	20.13	5.222	1.693	21.93	4.217	7.64	11.95	7.458	3.187	0	Dhrs1 (-3), Nop9 (0)	0.853954	13.0916	10.9847	2.64614
chr1	28188787	28188881	12.06	12.99	5.746	24.22	5.758	12.65	9.908	3.396	12.36	12.28	8.459	7.839	8.728	Gm597 (+591418)	0.849568	10.2296	1.94529	1.2837
chr5	45493359	45493454	5.618	3.957	6.231	17.99	5.211	4.77	15.91	2.777	15.92	18.95	8.513	5.543	0.9907	Lap3 (+33)	1.03819	11.8025	11.7911	0.180174
chr5	130171613	130171744	7.932	3.281	3.896	22.56	9.13	5.257	11.84	6.324	9.885	16.12	12.19	8.137	3.281	Rabgef1 (-15482), Kctd7 (+26818)	0.879236	11.5773	1.02867	1.1904
chr8	79294881	79295096	10.38	3.781	4.207	15.72	5.043	4.581	16.75	5.501	8.382	15.6	5.369	6.344	2.273	Mmaa (-33)	1.00187	11.7036	0.255402	0.837991
chr11	116130568	116130678	15.03	4.808	10.51	12.01	7.969	6.22	14.15	5.334	14.56	17.25	13.66	9.807	0	Trim65 (+503)	1.00372	12.1375	11.8881	0.492171
chr4	133553112	133553209	11.2	4.052	4.613	12.44	6.75	9.207	14.27	5.707	17.28	20.52	7.046	1.433	0.2992	Nr0b2 (-215)	1.07479	11.3828	11.2846	0.391792
chr11	59450009	59450072	11.25	5.014	4.112	15.66	5.633	4.608	26.87	3.339	16.62	4.624	14.2	7.168	3.075	Snap47 (-42), Jmjd4 (-4)	0.961478	11.4065	0.68927	0.655515
chr4	133013803	133013870	12.1	8.315	3.14	13.47	6.886	6.963	15.83	10.6	11.85	16.97	1.892	5.485	4.87	Wasf2 (-116668), Ahdc1 (+2331)	0.959808	11.342	1.38103	0.653535
chr10	80039835	80039898	11.57	4.334	7.303	10.34	8.816	2.304	22.56	11.1	14.46	13.9	12	7.865	0	Polr2e (-72)	1.03196	11.85	0.483832	0.325842
chr15	76511864	76512095	9.951	5.507	5.397	16.84	8.711	7.668	16.12	3.315	15.08	15.38	8.942	5.018	1.63	Dgat1 (-29)	1.08588	11.1316	0.978152	0.468229
chr1	63114268	63114342	15.53	5.493	7.809	10.71	6.283	10.45	16.64	7.929	17.35	15.39	9.583	8.697	4.791	Ino80d (-38)	1.06272	10.6327	1.4944	0.128485
chr11	98863548	98863612	12.45	2.87	6.33	16.92	7.264	2.175	12.09	11.42	8.762	16.81	8.581	5.999	0	Wipf2 (-58)	0.951898	12.355	12.184	0.801594
chr11	95414714	95414785	6.297	3.518	1.46	10.11	4.149	5.319	20.12	3.716	10.93	21.7	7.077	7.313	0.4971	Spop (+652)	1.17481	11.5229	0.961395	0.279983
chr16	56717293	56717611	9.545	1.505	2.849	12.45	4.419	5.794	19.47	3.116	11.58	16.75	9.817	6.221	1.11	Tfg (-2)	1.06735	11.7554	0.0559963	0.581202
chr3	40949395	40949493	11.84	2.511	1.602	17.42	4.146	6.725	17.43	1.619	7.971	11.47	1.971	3.228	0.9204	Larp1b (-1187)	0.976721	11.4191	0.624936	1.27519
chr5	23432986	23433090	10.2	3.461	8.817	12.68	10.13	8.203	16.56	7.026	19.92	18.57	9.024	8.333	3.032	Mll5 (-1411), 5031425E22Rik (+881)	1.19665	11.3149	11.1824	0.217793
chr1	150392733	150392828	12.78	3.119	1.438	14.33	8.517	6.283	18.13	2.719	17.2	12.72	7.274	4.754	0	Tpr (-57), BC003331 (+299)	1.08037	10.2952	2.54627	0.567569
chr16	30009109	30009194	12.06	2.578	7.98	13.19	5.365	12.02	15.52	5.752	17.33	17.07	7.899	4.216	0	Hes1 (-56188), Opa1 (+429772)	1.08432	11.4012	10.9875	0.407857
chr5	144768484	144768548	8.167	5.012	3.975	13.11	4.713	4.767	14.53	6.4	10.74	22	7.025	5.485	2.794	Trrap (-278)	1.07521	11.7996	0.398452	0.419089
chr3	5576166	5576581	9.628	2.431	2.202	12.33	4.092	5.064	18.69	3.499	12.49	17.09	7.22	2.965	0.567	Pex2 (-224)	1.06503	11.6073	0.378412	0.654596
chr10	42278161	42278232	7.473	7.467	6.104	18.46	14.77	8.824	19.55	7.329	13.01	12.18	6.078	6.618	1.602	Foxo3 (-1445)	0.815892	10.9325	1.96228	1.62277
chr5	14984963	14985042	4.484	9.779	12.6	30.23	13.14	23.83	14.16	11.56	20.84	8.723	5.902	7.753	2.085	Speer4d (-634061), Gm10354 (-6068)	0.845097	10.148	1.20888	1.27449
chr15	77970762	77970892	13.01	1.733	1.836	10.82	2.102	2.871	13.85	2.895	11.87	19.91	3.273	3.685	4.658	Eif3d (-3)	1.03666	11.328	0.744952	0.750989
chr18	84910026	84910132	15.03	2.726	2.103	7.99	4.553	8.467	10.63	1.915	15.35	23.93	4.697	4.761	0	Fbxo15 (-25079), Cyb5 (+58741)	0.914657	12.1807	11.533	1.03177
chr7	37885554	37885699	15.19	63.23	11.05	21.78	156.9	14.97	11.75	14.95	18.41	8.848	71.98	314.1	7.621	Zfp536 (-115665), Uri1 (+133915)	1.01023	12.4295	3.74769	0.725697
chr7	56050135	56050246	12.79	3.331	7.582	18.87	5.915	5.924	10.21	5.785	10.79	15.61	8.224	6.407	3.399	Herc2 (+36)	0.903525	11.8064	11.792	0.879915
chr17	46202638	46202778	5.353	3.078	2.288	23.96	3.853	5.48	14.92	3.875	11.78	13.21	9.29	2.612	1.759	Xpo5 (-147), Polh (-83)	0.803026	11.2035	0.641692	3.17775
chr10	59323122	59323358	11.35	3.3	3.899	11.3	3.278	5.121	17.05	6.52	12.16	17.66	6.01	6.337	4.493	P4ha1 (-56)	1.04605	11.8086	11.73	0.612431
chr7	97418956	97419020	8.856	6.504	0.3435	13.44	9.704	2.823	7.23	3.575	14.08	27.78	7.686	5.256	2.941	Thrsp (-1258)	0.960153	10.9136	1.86872	0.924531
chr7	63938883	63939027	10.55	5.238	5.376	16.18	6.987	9.298	15.73	5.241	17.22	14.84	7.481	7.237	2.914	Klf13 (-40)	1.06157	10.8648	0.93796	0.494016
chr13	73763597	73763691	10.33	5.236	4.41	12.51	4.285	10.35	19.12	1.629	14.47	15.34	6.437	11.38	0	Slc12a7 (-53)	1.14387	11.3932	0.624069	0.274034
chr11	103697908	103698009	10.85	1.091	1.85	5.937	5.446	5.176	18.9	3.069	14.78	21.52	6.991	7.549	8.294	Gosr2 (-61)	1.18048	11.968	0.108902	0.559337
chr2	30415362	30415527	10.31	3.458	2.855	13.04	6.195	7.647	15.12	9.505	19.7	18.72	7.526	9.452	3.931	Ppp2r4 (-594), Crat (+326)	0.991305	11.2498	0.427249	0.487471
chr1	60343517	60343583	12.88	5.899	5.757	12.32	2.931	4.017	21.23	10.09	9.601	10.75	10.38	3.934	7.427	Cyp20a1 (+227)	1.00336	12.3911	12.1532	0.533657
chr3	58576596	58576672	7.002	4.801	0	14.21	4.249	4.014	22.82	2.234	8.829	13.12	10.4	2.839	0	2810407C02Rik (-2)	1.06627	11.3847	1.42575	0.599068
chr13	35741329	35741438	8.002	5.493	9.22	15.28	8.514	4.742	19.5	6.314	8.743	14.36	5.938	3.254	3.864	Cdyl (+81522), Rpp40 (+164975)	0.989486	12.5962	11.1911	0.883073
chr11	102219000	102219133	12.17	4.041	5.348	15.54	14.73	7.104	13.8	5.952	13.23	15.6	6.035	9.554	0.1179	Hdac5 (+11099), G6pc3 (+29398)	1.02737	10.5162	3.51268	0.184775
chr2	156862941	156863082	9.737	2.501	3.82	13.87	10.31	9.758	18.46	5.182	16.91	15.03	13.01	7.625	0.5062	1110008F13Rik (-116)	1.08043	11.5053	0.272145	0.48404
chr12	100187455	100187582	7.711	1.436	2.918	15.4	4.038	11.71	20.67	3.865	14.55	13.28	7.699	6.507	4.44	Nrde2 (-27866), Calm1 (-11916)	1.04962	11.3072	0.516276	0.569318
chr6	37442302	37442374	10.1	3.129	1.832	7.95	2.169	7.405	22.67	1.948	17.47	16.34	5.071	10.36	0	Creb3l2 (-192)	1.1813	11.4611	11.2046	0.27918
chr4	147041833	147042011	11.85	6.521	17.13	20.85	13	16.17	10.92	16.56	18.54	13.43	10.33	16.56	8.156	Gm13139 (-90116), Rex2 (+20072)	0.85519	10.3585	10.134	0.321694
chr1	60669138	60669267	18.42	1.49	4.552	12.17	4.429	6.234	9.933	3.347	10.09	16.52	8.374	9.028	4.706	Raph1 (-102438), Cd28 (-77155)	0.856176	11.0369	0.416102	1.36365
chr9	75410057	75410127	11.72	3.446	9.331	12.77	6.312	10.3	10.05	5.193	14.1	22.49	9.376	3.709	0.986	Mapk6 (-733)	0.991992	11.8791	10.7126	0.498193
chr14	78849024	78849134	13.71	6.567	3.826	11	5.001	7.271	14.3	7.28	15.09	18	10.78	3.989	1.212	Vwa8 (-99)	1.0337	11.0542	0.944263	0.380625
chr1	191183399	191183622	10.58	1.806	2.971	13.8	5.626	4.636	14.21	3.972	10.57	18.42	6.238	7.6	0.8793	Atf3 (-171)	1.0317	11.7826	0.141224	0.58075
chr16	13671829	13671895	10.42	0.2968	4.163	10.81	6.238	4.914	16.18	1.426	17.04	19.58	11.25	5.707	0.3803	Parn (-3692), 3110001I22Rik (-67), Bfar (+4)	1.10637	11.3506	0.392256	0.526237
chr10	79937112	79937370	14.77	2.591	4.674	12.4	6.947	4.374	13.38	5.264	10.09	16.42	8.328	5.244	0.8816	Wdr18 (-22911), Arid3a (+10198)	0.968695	11.6606	0.510735	0.761715
chr1	75142661	75142725	10.68	6.313	1.202	9.329	4.464	10.18	25.1	4.44	13.9	11.85	8.581	7.856	3.284	Cnppd1 (-1158), Fam134a (-93)	1.03966	11.1135	11.0618	0.176762
chr10	81643720	81643844	5.129	4.562	4.432	20.28	9.502	4.754	17.72	3.78	5.071	13.77	6.838	7.136	0	Gm10778 (-18216), Ankrd24 (+15147)	0.960375	11.6376	0.868295	1.06687
chr9	95581095	95581263	11.8	3.476	3	12.6	5.83	5.051	15.76	3.91	12.77	16.72	11.3	4.963	3.637	Pcolce2 (-56422), Paqr9 (+21362)	1.00543	11.4281	0.662501	0.703753
chr7	116504170	116504340	13.15	1.801	0.4618	6.856	5.532	3.311	17.17	1.302	8.103	19.66	4.615	6.453	1.476	Nucb2 (-114)	1.18725	11.6697	0.734617	0.367959
chr9	25151710	25151774	8.364	5.663	4.073	13.96	2.884	10.55	16.17	7.669	4.508	18.33	7.167	7.885	0	Herpud2 (+39)	1.06806	12.5162	11.1245	0.408199
chr5	108065597	108065674	8.894	6.678	6.22	12.63	10.69	9.713	19.43	6.398	20.31	15.81	9.347	16.98	0	Mtf2 (-106)	1.06889	11.0125	1.48718	0.434709
chr11	58103898	58104076	10.63	1.912	1.905	18.23	2.233	4.676	17.37	3.732	13.79	10.53	7.849	5.321	6.319	Cnot8 (-242)	0.936345	11.41	0.411471	1.45761
chr1	185362928	185362992	7.232	3.061	1.423	14.33	14.14	4.489	16.98	4.209	8.205	18.21	8.016	7.656	0	Eprs (-135)	0.973437	11.3382	2.44116	1.01535
chr11	69395741	69395867	12.58	1.254	0.8225	6.599	3.69	2.727	17.36	3.763	12.72	20.16	3.377	3.584	4.083	Cyb5d1 (-471), Lsmd1 (+157)	1.01325	11.0344	2.30939	0.849265
chr6	70844076	70844254	15.69	1.403	0.8998	8.425	6.181	6.19	14.72	2.55	7.12	17.86	8.527	4.15	0	Eif2ak3 (-350)	1.09031	12.0087	11.9967	0.422253
chr13	64248601	64248732	11.47	3.879	2.086	5.981	2.845	6.591	18.12	7.648	5.184	21.07	6.542	8.081	0.09579	Cdc14b (+26306), Habp4 (+86801)	1.18893	12.0881	11.7315	0.30083
chr12	3235712	3235776	15.35	3.979	1.08	12.95	6.155	5.785	11.35	1.038	6.483	16.98	13.2	4.685	9.191	Rab10 (+74225)	0.902206	11.5484	0.65215	1.09109
chr5	108629758	108629870	13.21	4.067	2.299	17.04	7.415	4.126	14.87	5.634	9.84	11.51	2.613	8.815	0	Gak (-75), Tmem175 (-18)	1.00404	10.9011	2.20196	0.591469
chr7	144553717	144553783	6.942	4.174	3.069	17.58	12.53	7.697	20.37	8.499	11.2	11.66	6.721	4.931	0	Ppfia1 (-21)	0.890882	11.3124	1.43016	1.10091
chr18	64488996	64489126	9.882	3.88	8.479	11.78	8.381	4.671	18.24	6.501	13.61	16.49	2.112	4.191	3.861	Fech (+5)	1.1556	11.4965	11.466	0.24324
chr9	104262934	104263111	6.867	2.795	4.578	17.54	9.594	5.84	12.51	6.442	11.14	19.47	4.731	5.34	5.588	Dnajc13 (-93)	1.13071	11.8516	0.746437	0.256665
chr11	5485897	5486002	8.547	7.953	10.15	15.87	5.695	5.416	16.24	5.799	17.6	15.72	13.85	11.44	4.855	Znrf3 (-41103), Xbp1 (-34709)	1.0428	11.3496	0.618728	0.293904
chr14	16243302	16243430	7.896	0.4591	0.9568	10.18	3.383	1.388	15.31	2.451	10.96	22.99	4.904	1.286	4.718	Lrrc3b (-804379), Ngly1 (-5914)	1.10382	11.5186	0.512608	0.687191
chr4	99929391	99929475	6.935	0.7142	2.879	10.13	3.76	4.937	21.09	0.8567	11.36	18.21	3.916	6.682	1.354	Pgm2 (+19)	1.14449	11.6983	11.5894	0.407772
chr11	72607097	72607208	13.6	8.372	8.374	16.01	6.858	2.935	14.21	1.812	16.09	12.52	3.575	4.316	3.547	Ube2g1 (-130)	1.12342	10.6765	10.3847	0.437835
chr4	48279712	48279821	17.09	1.46	0.8643	6.238	3.272	5.897	16.34	4.334	8.297	16.53	3.045	2.717	0	Erp44 (-209), Invs (-35)	1.11526	11.9889	11.9095	0.336108
chr13	99344692	99344773	4.84	3.552	2.636	17.54	8.128	4.699	14.3	9.841	12.95	19.48	6.743	9.074	0	Ptcd2 (-55), Mrps27 (-53)	1.19964	11.7155	2.17073	0.163644
chr19	32757506	32757599	14.51	8.136	7.564	14.08	5.61	7.787	12.08	6.607	17.06	15.46	15.7	13.68	4.326	Pten (+56)	0.974555	10.8698	0.453606	0.481654
chr2	132816015	132816079	8.069	4.917	4.514	13.7	5.24	1.481	15.29	2.566	14.81	19.03	17.26	11.43	1.176	Mcm8 (-94), Trmt6 (+7)	1.03649	11.4956	0.925645	0.631296
chr15	103305181	103305309	6.888	2.554	7.189	15.7	6.03	4.709	16.34	4.988	13.12	17.13	8.829	5.814	0	Gpr84 (+5193), Copz1 (+32334)	1.06148	11.7897	11.6712	0.537078
chr15	39112716	39112779	10.62	2.546	4.835	12.6	7.239	4.96	19.06	1.582	11.58	13.75	5.844	6.269	3.162	Dcaf13 (-126), Slc25a32 (-32)	1.05655	11.5624	0.439546	0.620933
chr10	12868905	12868985	10.13	4.821	4.809	8.823	1.996	3.24	25.73	4.382	11.45	11.32	5.658	4.571	0.4412	Utrn (-7210), Stx11 (+95314)	1.0847	11.7935	11.7398	0.305216
chr19	29101266	29101369	7.75	6.871	5.945	7.896	0.982	5.565	21.37	4.031	8.859	18.93	10.4	3.355	4.66	Rcl1 (-57)	1.18091	11.0937	0.163674	0.239133
chr11	100545552	100545645	5.823	5.78	2.347	22.92	4.16	9.619	11.86	5.635	21	15.32	5.484	3.362	0	Ttc25 (-8)	0.961117	10.6183	1.68415	0.722007
chr18	31910711	31910821	8.287	1.469	1.984	17.48	6.404	3.837	14.02	4.026	13.32	16.09	8.477	8.51	2.232	Sft2d3 (+1137), Wdr33 (+106709)	0.970825	11.3552	0.976578	0.762995
chr11	70655028	70655119	8.391	4.682	2.278	18.6	5.811	1.611	20.68	6.387	14.23	8.168	7.925	6.63	0.01724	Eno3 (-2130), Pfn1 (-430)	0.848786	12.4769	11.6069	1.47647
chr7	130592442	130592548	5.703	11.07	7.999	9.114	5.859	9.389	27.24	9.922	8.256	13.71	9.793	10.87	4.04	Tacc2 (+15011), Etos1 (+180157)	1.19691	11.938	2.59103	0.00883575
chr5	65537150	65537259	9.287	3.01	6.958	12.64	4.656	8.37	10.42	3.182	12.62	23.4	5.994	13.8	7.232	Ube2k (-28)	1.12162	11.6563	11.0999	0.424352
chr2	90940338	90940456	9.873	5.416	11.79	16.02	7.609	9.689	13.25	5.035	11.62	16.59	9.385	8.522	0.03988	Celf1 (-47223), Ndufs3 (-35570)	1.02593	12.2708	10.8359	0.335628
chr16	84735243	84735375	11	5.575	8.41	14.61	9.76	6.508	11.86	8.024	14.24	18.26	13.11	8.435	1.771	Mrpl39 (+433)	0.958934	11.7884	0.234939	0.359566
chr8	47713927	47714024	5.259	5.428	2.849	18.52	6.311	6.581	20.66	2.035	8.053	11.24	10.13	4.806	3.024	Cdkn2aip (-45)	0.955574	11.3931	1.14043	1.00745
chr5	36724431	36724526	3.646	6.135	2.066	17.65	7.994	7.171	15.31	3.768	17.3	19.01	11.39	8.256	0.0743	D5Ertd579e (-28510), Bloc1s4 (+24200)	1.03522	11.0804	2.02838	0.152281
chr15	37135734	37135850	11.86	3.441	3.871	13.96	9.117	5.107	18.47	3.468	5.617	11.3	6.972	7.03	0	Zfp706 (-128390), Grhl2 (-97244)	1.01024	11.6853	0.583465	0.671564
chr9	124424511	124424779	9.951	3.308	2.039	11.66	5.727	4.283	20.52	2.671	11.48	13.43	10.83	2.702	0.7433	Ppp2r3d (-491)	1.06934	11.5803	0.610593	0.562703
chr4	63346815	63346959	12.64	1.046	1.876	13.29	1.811	2.294	16.09	3.549	13	13.51	5.574	0.8253	0	Orm3 (-9275), Orm1 (+2327)	0.979361	11.6217	0.201577	1.16744
chr8	126829723	126829853	13.99	3.296	2.983	12.34	7.289	8.556	11.03	0.8516	14.24	18.13	6.128	3.038	6.232	Irf2bp2 (-236352), Tomm20 (+116133)	0.999362	11.3257	0.0799988	0.584211
chr1	36691385	36691459	9.446	5.245	2.334	6.213	1.031	9.326	17.73	4.912	14.96	22.03	4.69	4.991	0	Cox5b (-65)	1.17163	12.3088	10.6459	0.132491
chr17	29416275	29416404	10.39	4.214	2.167	17.61	2.834	9.219	10.53	3.204	8.179	16.87	10.14	7.257	8.141	Pim1 (-74472), Fgd2 (+55398)	0.926177	13.6871	11.1905	0.655364
chr5	142629397	142629534	11.73	2.056	5.891	13.71	11.94	6.519	17.53	5.697	14.04	12.43	9.185	4.951	1.895	Wipi2 (-76)	0.842694	11.6966	0.783953	1.39281
chr10	31083541	31083605	8.388	10.37	4.98	15.95	15.19	17.82	18.37	4.526	7.521	12.69	8.251	14.2	7.966	Hey2 (-240772), Gm5422 (-164567)	1.158	11.2203	2.94284	0.0899889
chr12	110244705	110244775	14.96	3.673	0	21.18	1.521	8.251	10.34	4.613	17.94	8.804	7.221	6.007	1.401	Rtl1 (-644410), Dio3 (-34328)	0.879641	10.4803	1.27522	1.6721
chr6	134120835	134120938	14.64	4.137	2.409	13.82	6.495	4.112	10.86	3.547	11.91	15.94	6.24	6.639	1.713	Bcl2l14 (-275431), Etv6 (+85187)	0.912152	11.2465	0.875625	1.04683
chr17	29396852	29396983	11.99	2.645	4.651	10.28	7.152	5.845	10.47	4.042	12.78	22.51	11.82	3.517	1.682	Pim1 (-93894), Fgd2 (+35976)	0.978606	11.4032	0.354863	0.586789
chr14	70766588	70766776	8.642	7.099	6.916	15.32	8.854	5.893	15.2	7.243	7.69	16.05	8.973	2.606	1.435	Xpo7 (-54)	1.05392	11.7006	0.709036	0.470317
chr18	46525769	46525874	7.227	3.976	10.62	12.16	11.8	5.303	17.42	6.66	10.99	18.39	5.389	8.149	4.676	Fem1c (+149)	1.19198	11.6441	0.635078	0.233899
chr16	30008939	30009090	17.01	3.324	3.879	10.94	6.052	8.18	13.14	5.303	6.257	14.06	4.666	9.723	0	Hes1 (-56325), Opa1 (+429635)	1.02192	11.8404	11.3536	0.510004
chr3	142881932	142882229	8.943	3.652	4.779	17.32	10.92	2.074	19.51	7.641	12.08	9.356	9.307	5.257	1.558	Pkn2 (-77)	0.825333	13.6617	11.6894	1.64228
chr17	83836216	83836306	8.502	1.714	3.664	8.663	7.256	4.706	16.74	7.299	11.92	21.21	6.438	3.9	1.447	Haao (+10529), Mta3 (+130070)	1.096	11.3395	1.37824	0.38034
chr4	134287293	134287356	15.04	7.851	4.063	14.16	5.07	12.72	16.57	4.715	11.83	9.338	9.388	15.03	3.349	Pdik1l (+570)	0.960161	10.9093	0.80695	0.579963
chr2	157279200	157279334	9.094	1.992	3.14	13.69	6.86	6.764	11.88	2.534	9.603	20.4	8.22	6.959	6.076	Rpn2 (+208), Mroh8 (+282)	1.05089	11.8656	11.8506	0.465795
chr2	32535284	32535354	5.533	8.92	3.768	19.72	12.93	4.697	10.17	6.273	6.992	19.64	8.88	9.037	1.345	Fam102a (-40)	0.972627	11.3422	2.02176	0.725316
chr18	65800305	65800381	13.46	2.046	5.351	8.197	4.133	1.89	17.81	5.195	3.519	15.58	5.698	2.045	11.59	Sec11c (-206)	1.09015	12.1575	11.9831	0.53379
chr17	28691105	28691315	6.148	6.355	5.907	16.31	9.253	6.982	19.1	8.083	17.63	13.47	10.49	7.705	4.276	Slc26a8 (-1223), Mapk14 (-132)	1.12484	10.8193	1.57503	0.270658
chr16	4683993	4684125	8.361	3.265	4.425	13.57	5.633	7.17	14.08	2.055	10.25	19.01	4.698	4.114	0	Coro7 (-4282), Dnaja3 (-11)	1.08534	12.1065	11.2254	0.295273
chr9	4309661	4309752	8.183	2.731	8.748	11.04	3.1	7.649	15.82	3.67	10.28	19.97	10.06	4.862	3.456	Aasdhppt (-213), Kbtbd3 (-36)	1.10993	12.5464	10.5466	0.435098
chr1	171344658	171344719	18.22	7.908	7.542	10.47	13.41	7.696	13.97	5.082	9.804	12.34	8.311	16.84	9.45	Pfdn2 (-981), Nit1 (+956)	0.957769	11.7897	0.919601	1.09846
chr18	40219338	40219415	10.63	3.291	2.692	12.23	5.646	4.732	21.2	6.925	15.15	10.94	4.918	8.88	0	Yipf5 (+22)	1.02907	11.2059	0.715563	0.602263
chr2	25608470	25608533	12.37	0.3887	3.888	9.23	7.295	8.534	23.73	3.017	18.14	9.664	8.598	8.793	3.025	Rabl6 (+19)	1.07534	11.5349	11.3388	0.568738
chr4	136140388	136140488	6.297	5.069	6.752	14.79	3.159	9.834	21.59	2.989	11.28	12.29	7.604	4.461	0.7216	Id3 (-3059)	1.11735	11.7249	0.101199	0.202765
chr13	100651311	100651374	11.75	4.217	4.262	14.53	7.267	0.6582	19.51	2.548	4.116	9.16	5.46	6.936	0.112	Rad17 (-284), Taf9 (-264), Taf9 (0)	1.09127	12.3989	12.2733	0.629472
chr15	60994057	60994203	14.68	3.061	0.9249	8.037	5.567	5.062	19.72	1.517	11.68	12.46	6.428	4.821	3.207	Myc (-991261), A1bg (-72860)	1.07687	11.6676	0.27311	0.772392
chr4	57112330	57112406	7.002	1.965	2.686	7.362	7.845	3.936	19.45	9.711	16.89	20.99	9.053	16.55	0	Frrs1l (-121977), Epb4.1l4b (+31069)	1.107	10.9787	1.62477	0.288204
chr7	113260629	113260760	14.54	1.411	1.942	13.51	7.26	8.728	17.13	2.549	12.93	9.594	6.795	4.634	3.904	Arntl (+53230), Btbd10 (+108644)	0.910409	11.4922	0.489515	1.32915
chr1	87573934	87574003	11.57	2.289	3.004	9.873	1.517	4.851	13.7	6.257	12.19	19.62	10.41	4.372	6.377	Ngef (-99), Neu2 (-58)	1.00782	11.855	11.5801	0.592757
chr8	72421486	72421556	7.737	1.189	2.333	15.47	3.295	3.766	19.19	5.904	9.539	12.33	6.078	5.328	0.8515	Eps15l1 (-47)	1.01645	11.6948	0.280644	0.703015
chr11	115187373	115187449	11.08	2.159	2.913	13.97	6.187	7.678	17.59	8.133	10.83	12.07	6.512	6.183	2.921	Tmem104 (-76), Nat9 (-21)	0.950021	11.6732	0.252758	0.781279
chr1	10233042	10233139	12.5	2.07	10.08	9.132	3.384	7.787	16.83	5.821	12.23	16.17	8.353	7.577	3.129	Arfgef1 (-421)	1.02766	12.5	10.5083	0.492329
chr13	37460380	37460456	11.52	2.384	4.463	20.31	9.666	5.184	10.46	4.613	4.009	12.34	4.209	7.795	0	Rreb1 (-365897), Ly86 (+115073)	0.882603	11.733	0.600299	1.30357
chr2	118510416	118510487	9.158	4.139	3.008	11.49	2.624	2.315	9.358	3.95	13.38	24.59	1.849	1.725	0	Srp14 (-30741), Bmf (+39235)	1.07403	11.3211	0.784171	0.715806
chr13	32338663	32338780	5.934	2.103	2.241	14.05	1.365	3.392	19.36	1.372	6.524	15.21	11	0.7345	1.006	Gmds (-10)	1.14356	12.9455	11.1291	0.529957
chr10	4432280	4432350	8.547	3.848	2.019	21.09	5.323	9.309	12.88	3.954	13.89	12.01	3.664	10.71	4.818	1700052N19Rik (-152), Rmnd1 (+73)	0.970716	10.8589	1.69236	0.863583
chr16	20672708	20672859	10.17	2.376	4.409	12.08	5.664	7.601	18.53	3.116	9.306	13.72	5.226	6.538	3.277	Eif4g1 (-733)	1.07594	11.7842	11.5517	0.484413
chr9	108079302	108079384	13.44	4.36	5.63	11.88	11.86	2.854	15.97	3.555	17.71	13.21	8.464	4.816	1.875	Mst1 (-1093)	0.980178	10.6341	1.96095	0.702954
chr10	42714855	42714935	9.643	0.7652	2.257	9.389	10.2	5.832	17.13	3.46	5.976	18.33	5.281	3.999	1.225	Sec63 (-46601), Ostm1 (+35979)	1.19336	11.7878	0.43407	0.381149
chr2	120567600	120567663	7.047	1.73	0	11.1	3.436	10.44	23.86	3.661	16.88	12.48	9.532	3.366	0.1245	Zfp106 (-3825), Snap23 (-65)	1.11994	11.2475	0.761763	0.350202
chr5	135108229	135108296	7.731	7.949	7.968	14.96	6.965	0.84	11.6	9.06	12.19	20.18	7.927	5.185	4.577	Tbl2 (-41394), Mlxipl (+1361)	1.03308	11.6301	1.15327	0.442553
chr16	31948489	31948561	4.745	2.109	4.296	21.73	6.851	5.657	18.06	1.845	7.901	9.934	10.98	4.749	0.01089	Ncbp2 (+12)	0.908172	11.6002	0.54738	1.57045
chr2	36136602	36136665	8.072	4.14	5.957	10.13	8.506	7.781	26.57	7.117	11.45	9.693	6.514	3.512	3.897	Rbm18 (+139), Mrrf (+245)	1.09902	11.6401	11.5439	0.114723
chr4	82506424	82506497	8.238	3.992	2.796	19.76	4.74	8.683	12.29	2.174	13.37	14.17	7.937	8.29	5.813	Nfib (-1153)	0.954853	11.0363	1.12256	0.829795
chr17	25184488	25184593	8.157	6.064	2.168	11.72	10.24	11.11	23.56	2.917	15.23	10.99	12.63	5.764	0.5079	Unkl (-3856), BC003965 (-20)	1.16947	10.8684	1.98899	0.154079
chr3	142765078	142765218	6.882	3.918	1.368	16.45	7.478	2.856	9.102	3.242	18.13	21.98	4.893	6.948	4.852	Gtf2b (-78)	0.993769	10.9488	1.54878	0.711306
chr19	26604954	26605063	12.83	5.437	4.739	9.909	3.663	6.033	13.68	11	12.62	17.99	6.921	4.613	0	Smarca2 (-106)	0.991943	11.8897	11.8021	0.486184
chr5	113153244	113153420	8.766	3.172	4.889	15.07	3.569	2.289	16.69	4.739	17.5	13.88	5.795	6.545	6.845	Crybb3 (-72222), 2900026A02Rik (+10019)	1.0216	11.3091	0.533893	0.685629
chr12	25786070	25786137	10.46	2.759	0.9374	11.44	2.304	5.99	13.28	0.7436	9.627	19.2	4.887	8.76	10.71	Id2 (-690012), Rnf144a (+629152)	0.998488	11.3995	0.597864	0.893078
chr15	91907137	91907205	7.988	11.85	11.2	15.83	4.828	7.122	20.89	9.958	3.17	9.667	10.81	13.98	12	Cntn1 (-143994), Smgc (+68843)	1.09436	11.4441	1.68408	0.212002
chr5	90689912	90690006	13.06	0.9378	1.904	4.629	6.796	7.027	20.27	4.358	11.41	16.41	2.729	4.24	0.7676	Cxcl5 (-69340), Rassf6 (-49472)	1.19345	12.0758	11.8427	0.519267
chr19	41911777	41911860	6.203	1.165	1.513	12.92	6.948	4.443	15.34	5.824	5.506	19.89	4.581	3.436	0.2835	Pgam1 (-52)	1.17614	11.6906	1.42426	0.387413
chr5	108312712	108312785	6.88	4.847	2	12.65	5.251	8.521	19.84	4.449	10.81	14.94	4.816	7.038	0.8595	Pigg (+140)	1.09728	11.3436	1.42079	0.338617
chr18	80206690	80206770	13.38	3.673	5.888	19.43	6.654	5.369	17.5	5.535	10.33	3.968	4.338	4.114	4.314	Gm16286 (-165), Txnl4a (-65)	0.94871	10.2624	2.54792	0.862824
chr8	94098498	94098569	5.233	2.638	1.858	14.3	1.275	3.379	18.3	1.351	5.364	16.41	9.945	7.21	0.09942	Bbs2 (+277)	1.09622	13.6709	10.6147	0.585707
chr8	94098498	94098569	5.233	2.638	1.858	14.3	1.275	3.379	18.3	1.351	5.364	16.41	9.945	7.21	0.09942	Bbs2 (+277)	1.04379	10.3984	2.5795	0.579338
chr2	180024626	180024762	5.626	3.475	1.385	16.17	4.906	4.465	19.28	5.752	16.97	13.16	5.325	5.754	0	Lsm14b (-293)	1.06603	10.8265	1.51192	0.576973
chr1	185203994	185204065	9.269	3.725	2.809	6.713	7.298	6.091	22.43	4.47	4.794	15.81	6.12	2.318	6.341	Rab3gap2 (-138)	1.16214	11.8882	0.999801	0.0861193
chr17	71183522	71183586	6.839	4.132	0.8832	11.13	8.54	5.322	14.72	6.054	11.14	21.53	17.07	7.256	6.446	Lpin2 (-21122), Myom1 (+163986)	1.04392	11.438	0.894328	0.317044
chr5	28071072	28071169	10.23	1.944	3.318	18.2	4.994	10.92	13.17	2.777	13.2	12.59	7.28	3.072	0.2264	Insig1 (-242)	0.907879	10.6671	1.07359	1.66573
chr5	53590281	53590447	12.47	1.726	3.159	12.26	6.318	8.181	16.45	5.313	7.059	12.99	10.13	6.113	0.4583	Rbpj (+149)	1.01566	12.2145	11.9307	0.521328
chr5	31054725	31054881	9.698	6.459	4.157	15.08	8.338	6.332	16.11	5.997	8.706	13.28	5.513	7.817	0	Cad (+23)	0.964404	11.4212	1.10484	0.761835
chr5	44226634	44226761	13.87	2.516	7.567	15.37	9.515	7.51	11.53	2.179	7.644	13.38	8.091	6.507	3.73	Tapt1 (-92)	0.968943	11.9092	11.5843	0.604892
chr16	91727569	91727633	8.069	1.607	2.233	8.094	6.432	1.481	15.18	5.737	10.48	22.79	13.15	4.342	1.985	Itsn1 (-1752), Cryzl1 (+1374)	1.09984	11.5703	0.987575	0.449721
chr15	99393655	99393770	8.009	2.981	2.321	19.48	4.629	5.795	9.182	4.252	12.75	17.46	4.658	5.565	1.023	Tmbim6 (+831)	0.95074	11.2805	0.98206	0.897128
chr3	84814422	84814485	3.099	1.069	2.243	16.1	8.394	4.655	20.58	7.732	14.07	14.35	12.77	4.382	2.689	Fbxw7 (-814)	0.829272	11.7237	0.828759	1.9302
chr7	30588835	30588945	8.731	3.117	4.711	14.19	7.179	5.318	11.16	3.774	9.43	20.03	12.48	2.244	3.244	Wbp7 (-164)	1.02425	12.1128	12.0046	0.44054
chr16	70313909	70314063	6.441	2.417	6.872	16.32	7.778	7.732	16.56	9.465	9.787	14.77	9.396	5.319	3.351	Gbe1 (+37)	0.910797	12.1713	11.803	0.894014
chr18	61859261	61859350	4.546	2.421	1.411	17.62	6.28	4.493	13.8	0.8085	25.37	18.11	4.577	6.307	2.794	Afap1l1 (-72604), Ablim3 (+52518)	1.06673	10.5331	1.04905	0.42308
chr16	38452675	38452806	9.422	5.72	4.147	10.14	9.035	6.862	19.98	8.69	11.98	14.5	9.421	13.23	5.077	Adprh (-52)	1.08201	11.2874	1.06969	0.266871
chr6	143167144	143167248	6.57	4.686	3.11	15.96	4.027	10.65	20.83	3.584	7.854	10.63	4.265	6.399	1.87	Etnk1 (-34)	1.03578	11.7093	0.252643	0.501776
chr17	65613574	65613745	9.529	1.217	3.306	9.861	5.697	9.449	18.45	7.111	11.5	16.15	10.54	3.603	1.183	Vapa (-105)	1.09888	12.0911	11.7329	0.362682
chr8	121950515	121950578	7.747	1.477	6.555	10.18	10.93	3.197	20.13	8.552	8.901	15.89	12.86	3.512	0	Banp (+3)	1.05564	11.9688	0.79724	0.359829
chr1	6214556	6214620	11.66	4.056	3.729	9.794	5.712	5.23	17.43	4.094	14.99	15	7.403	11.2	9.24	Rb1cc1 (-57), 4732440D04Rik (+704)	1.03098	11.3319	0.838562	0.587493
chr7	120173736	120173817	6.259	3.613	1.105	10.57	3.374	8.027	13.59	2.278	13.73	23.45	10.39	3.86	3.282	Anks4b (-81)	1.00876	10.9659	1.19567	0.553778
chr17	41770457	41770536	10.38	15.45	3.299	17.95	2.448	4.968	12.92	6.026	6.585	12.6	14.5	5.855	11.99	Cenpq (-835450), Ptchd4 (-545450)	0.821093	13.2054	11.7535	1.85415
chr7	80993412	80993520	10	6.054	2.413	14.32	4.239	2.935	12.81	5.535	16.18	16.7	8.382	3.623	4.764	Zfp592 (-215)	0.954351	11.0432	1.14741	0.793243
chr16	32003151	32003239	11.59	1.503	3.319	7.211	7.36	3.467	20.87	7.422	18.1	14.13	10.6	4.467	2.184	Senp5 (+92)	1.01729	11.5114	0.662867	0.590675
chr19	8966607	8966697	15.67	0.517	3.96	9.814	2.681	4.328	18.71	1.763	6.411	9.587	9.204	3.189	4.889	Eef1g (-389)	0.990495	12.1812	11.5775	1.02614
chr11	106216848	106216951	8.239	0.2615	5.549	10.74	4.669	8.469	15.3	3.851	12.49	19.49	6.519	5.751	3.175	Ccdc47 (-556), Ddx42 (-26)	1.15962	11.9998	10.8503	0.416426
chr4	133814086	133814214	9.889	2.659	4.956	14.69	5.545	10.88	19.37	5.91	8.863	9.804	10.75	12.51	8.419	Arid1a (-60539), Rps6ka1 (+73647)	0.97841	11.9241	11.3916	0.504008
chr17	24850114	24850294	7.295	5.346	2.268	16.27	7.216	9.199	10.57	3.198	17.99	19.61	8.164	8.695	2.336	Hagh (-286), Fahd1 (+98)	0.995065	10.8398	1.44229	0.496165
chr9	15306137	15306260	8.422	3.414	2.247	13.29	3.506	3.359	14.04	7.681	5.705	17.98	6.857	5.946	3.182	Taf1d (-15), 4931406C07Rik (+249)	1.03816	12.0624	0.0404572	0.663735
chr12	80114388	80114478	8.677	5.605	6.316	15.69	5.402	6.944	11.31	7.545	10.44	18.01	11.5	8.532	0.06972	Zfp36l1 (-1420)	0.986829	11.9858	0.0820614	0.44016
chr7	59228648	59228764	7.519	1.161	2.085	13.91	4.834	9.065	15.59	2.068	14.7	16.65	8.767	1.166	6.383	Ube3a (-46)	1.08058	11.0693	0.897682	0.693021
chr8	70439620	70439779	11.22	2.225	9.224	9.774	7.187	8.337	16.63	3.133	12.52	16.02	7.468	7.003	2.195	Crtc1 (-121)	1.12259	12.2842	10.825	0.331329
chr4	149774273	149774354	6.861	5.487	4.381	11.3	7.054	4.864	20.36	7.289	11.54	15.08	10.93	5.259	5.568	Slc25a33 (-37)	1.10666	11.5421	1.07078	0.233509
chr11	94321988	94322100	7.759	2.339	6.337	14.34	4.405	7.432	17.54	6.392	12.01	13.94	7.059	8.162	0	Luc7l3 (-56)	1.04673	11.7415	11.2883	0.411448
chr5	144768703	144768773	4.588	1.679	1.705	17.56	8.441	8.294	14.81	2.873	12.32	16.59	9.57	5.877	0	Trrap (-56)	1.11647	11.3294	2.488	0.324482
chr18	63692293	63692469	8.319	0.9391	2.739	14.59	6.806	6.118	19.5	5.682	8.776	11.07	6.67	5.184	1.39	Txnl1 (-22)	0.983821	11.7117	0.324535	0.775836
chr5	122354190	122354300	10.45	2.894	3.14	10.83	3.872	4.578	13.48	4.026	14	18.68	5.761	4.322	3.779	Vps29 (-124), Rad9b (-12)	1.00706	11.3155	0.972222	0.699977
chr17	15010144	15010250	13.4	4.112	4.266	10.68	6.629	9.473	17.64	6.266	14.95	11.7	12.87	5.416	0.222	Gm3435 (-69), Gm3448 (-13)	1.00332	11.6646	11.663	0.567412
chr13	100651072	100651170	10.73	0.5997	4.358	17.58	9.705	10.94	16.76	4.029	10.45	8.347	9.484	7.276	1.601	Taf9 (-486), Taf9 (-222), Rad17 (-62)	0.899412	11.5408	0.21312	1.10807
chr3	96240484	96240558	9.787	7.876	4.074	18.97	8.297	7.845	11.06	5.436	15.02	13.58	12.19	18.68	0.06359	Hist2h3c2 (-1394), Hist2h2aa2 (-198)	0.876758	10.4532	1.72652	0.951801
chr13	24761971	24762035	8.708	4.094	4.833	12.59	7.403	4.235	11.18	5.968	20.79	20.89	11.69	3.514	0	Gmnn (-142)	1.07637	10.6142	0.297438	0.25667
chr4	82404449	82404594	15.91	3.369	5.436	10.79	10.77	7.068	8.69	6.464	11.89	17.97	6.254	6.973	2.542	Mpdz (-961715), Nfib (+100786)	0.851792	10.9636	0.430977	0.749102
chr11	98951516	98951799	11.74	3.08	6.863	12.48	8.402	5.568	15.28	3.912	12.83	13.85	3.94	7.21	3.395	Rara (+13940), Gjd3 (+31358)	1.07564	11.4589	0.254552	0.429952
chr1	55087936	55088241	8.398	2.766	4.69	10.77	7.086	5.953	18.22	5.971	10.39	15.94	7.109	6.534	5.341	Hspd1 (-65), Hspe1 (-43)	1.0874	11.7411	0.200924	0.369081
chr3	51415917	51415981	11.34	3.52	5.447	11.76	5.434	6.85	18.37	5.737	15.9	11.85	14.17	6.256	5.061	Naa15 (-67)	1.01101	11.6517	11.5852	0.493259
chr3	32396904	32396968	11.17	4.63	6.771	8.216	8.096	5.137	15.39	6.112	9.066	18.5	5.375	3.542	3.333	Pik3ca (-39215), 4930429B21Rik (+31161)	1.14768	11.634	1.22635	0.282906
chr9	88599629	88599701	10.15	3.333	2.224	15.42	6.58	11.19	11.67	6.074	17.49	16	9.409	15.64	0	Trim43a (+18629), Gm2382 (+120133)	0.968258	11.0088	0.763899	0.491567
chr8	26119193	26119330	7.481	4.397	4.516	17.65	7.318	9.675	14.48	5.751	7.973	13.62	9.526	5.205	2.17	Rnf170 (-106), Hook3 (-38)	0.998586	11.3274	1.79348	0.667969
chr15	38299487	38299606	11.75	5.71	8.498	14.41	13.81	5.165	16.48	5.83	11.88	10.53	9.585	7.667	0.3164	Klf10 (+1160), Odf1 (+80344)	0.82312	11.4321	1.25914	1.22676
chr13	43304244	43304424	10.81	3.496	5.408	16	9.03	6.122	9.531	2.809	7.887	16.81	14.17	9.528	1.455	Gfod1 (-162)	0.937655	11.8522	0.293227	0.624999
chr10	34282138	34282202	3.739	1.875	1.276	14	6.432	9.164	11.72	3.114	19.4	23.69	2.923	6.742	0	Tspyl1 (-20)	1.07576	11.788	11.1865	0.229353
chr18	36281021	36281095	12.85	2.068	7.342	7.876	10.43	4.803	20.04	4.588	7.337	12.32	7.768	6.202	5.798	Pura (-39)	1.10831	11.7785	0.194094	0.244444
chr7	12834916	12834986	6.657	0.2799	4.89	17.72	5.425	3.301	15.46	3.374	6.02	13.23	6.811	0.4179	3.07	Zfp110 (+190)	0.970658	12.039	11.8738	1.35589
chr5	52834022	52834161	10.59	3.4	2.621	13.5	6.779	4.038	17.13	5.469	15.15	11.81	5.406	4.262	3.414	Anapc4 (+77)	0.990208	11.1053	1.02349	0.737456
chr9	18292025	18292088	13.69	0.3498	0	11.51	3.324	3.197	17.08	3.163	4.785	10.73	8.119	1.306	2.627	Chordc1 (-210)	0.987301	12.028	0.0795323	1.23669
chr8	79639107	79639199	12.01	5.377	4.54	11.8	6.944	10.95	19.11	5.134	10.45	10.07	4.018	9.42	5.286	Otud4 (-465)	1.03856	11.3733	0.159519	0.320702
chr5	124005022	124005109	7.347	2.477	3.195	8.351	4.569	3.456	15.89	4.772	14.62	21.36	9.365	6.347	0.5139	Vps37b (+27194), Hip1r (+31438)	1.12697	11.5653	0.455829	0.371965
chr6	97269908	97269985	12.53	4.405	0	9.234	2.42	5.847	12.6	4.553	7.114	18.55	5.741	6.221	1.783	Lmod3 (-17167), Frmd4b (+347594)	1.1869	12.3406	11.1768	0.25963
chr8	120537291	120537462	8.608	3.637	5.023	10.04	7.627	7.656	16.06	11.6	13.19	18.15	8.435	8.137	3.738	Gse1 (+48930), Gins2 (+51927)	1.06737	11.6032	0.42473	0.264118
chr7	127254226	127254463	8.463	3.337	2.783	16.36	6.491	6.786	13.43	2.888	11.96	14.57	6.627	9.265	0.5626	Dctpp1 (+6364), Zfp771 (+9819)	1.00187	11.2971	0.979108	0.56976
chr17	15041525	15041627	11.7	3.709	3.941	11.01	5.932	3.615	11.93	5.789	17.3	18.18	14.66	6.865	3.806	2210404J11Rik (-65), Tcte3 (-17)	0.987668	10.4744	0.832983	0.22302
chr1	31073213	31073283	15.34	2.029	0	19.3	1.774	4.253	7.712	3.98	12.25	10.46	3.6	3.239	0	Lgsn (-103158), Gm5699 (-73343)	0.827522	10.8887	1.082	2.23734
chr3	103020537	103020601	7.995	8.685	2.576	8.6	4.408	9.742	15.48	4.613	17.07	20.72	7.686	5.456	3.578	Csde1 (+23)	1.09854	10.8735	1.6214	0.362333
chr17	25985676	25985780	8.659	3.438	1.329	11.46	5.085	2.905	11.41	3.868	13.06	21.26	7.66	8.192	1.9	Solh (-48)	1.01233	11.2498	1.06465	0.647812
chr7	93414570	93414642	7.959	19.76	8.68	22.52	6.556	8.269	13.02	7.381	15.49	9.286	8.298	3.707	0	Gm9934 (-333579)	0.861993	10.109	2.40823	1.11845
chr8	82774162	82774239	9.283	1.844	2.366	7.03	2.443	1.327	20.08	3.043	8.693	16.3	7.289	8.833	0.08149	Zfp330 (-41)	1.10552	11.7737	0.16256	0.478618
chr8	95434802	95434872	7.062	5.352	6.685	16.13	9.886	5.67	10.41	7.328	12.78	19.05	4.44	9.56	3.16	Gtl3 (+32)	1.09536	11.3736	1.093	0.279841
chr1	165194371	165194506	10.34	4.099	4.687	9.814	10.66	5.858	17.84	3.54	11.36	14.65	9.656	5.932	1.54	Sft2d2 (-6)	1.16107	11.5266	0.716233	0.275426
chr10	61680108	61680305	9.398	2.324	5.898	7.586	6.305	5.293	17.01	5.217	10.23	18.63	6.441	3.926	1.776	Sar1a (-103)	1.18882	12.0462	11.5322	0.25468
chr5	92505526	92505751	6.43	4.032	4.404	15.14	7.563	4.186	11.13	3.666	14.54	19.88	6.847	9.467	3.137	Scarb2 (-31)	1.04119	11.2123	1.12442	0.406287
chr2	163596165	163596231	9.255	4.489	1.808	10.07	6.722	2.424	7.604	2.432	18.15	25.64	13.21	1.136	0	Ttpal (-6116), Hnf4a (+49010)	1.02445	10.6169	1.48856	0.471388
chr2	90847076	90847249	7.79	4.664	2.705	11.56	5.744	5.993	15.19	4.149	9.499	18	6.672	3.731	0.2584	Mtch2 (+8)	1.11596	11.3194	1.15099	0.449402
chr5	29569033	29569204	7.494	3.523	5.243	17.09	9.931	5.777	10.02	3.798	19.89	17.92	6.353	6.544	1.197	Ube3c (-123)	1.03887	10.7399	1.04429	0.290663
chr10	119240094	119240317	10.42	3.245	3.591	9.85	3.056	4.895	14.88	1.986	7.718	17.37	8.796	4.747	1.512	Cand1 (-151)	1.10821	12.0036	11.8109	0.447396
chr9	21831061	21831140	14.27	1.984	1.948	13.77	12.08	9.692	10.42	2.99	17.05	14.04	6.226	5.3	1.906	Gm6484 (-4409)	1.03344	10.9187	10.8584	0.154943
chr5	33378527	33378668	9.044	1.771	1.236	17.92	8.419	6.145	10.69	4.423	15.64	14.83	8.186	6.419	3.043	Uvssa (-98)	0.949356	11.0348	1.21082	0.663636
chr9	122351565	122351701	6.737	2.404	4.676	18.25	3.927	9.18	18	5.657	10.99	9.489	10.58	4.49	4.619	Abhd5 (+25)	0.846774	11.3642	0.560508	1.45528
chr19	6046967	6047047	10.17	1.791	5.28	10.81	4.569	4.073	16.6	5.074	12.58	14.89	12.64	7.085	0.02941	Syvn1 (+431)	1.02126	11.9894	11.6486	0.554989
chr8	11497488	11497578	9.166	0.8707	7.537	14.33	4.574	7.504	11.57	5.986	20.1	17.39	9.791	6.582	1.377	Carkd (-35)	0.971813	11.439	10.6157	0.532578
chr10	44268304	44268367	6.547	1.224	3.739	17.25	15.52	8.675	15.27	4.862	13.74	13.37	3.88	8.474	3.548	Atg5 (-22)	1.0324	10.3202	3.57124	0.249394
chr1	52113897	52113967	7.107	8.326	8.524	20.92	12.52	10.13	15.05	9.516	8.729	9.338	9.441	1.854	3.473	Gm3940 (-22866), Stat1 (-5506)	0.800148	11.8358	0.675012	1.22818
chr2	27248379	27248478	19.8	2.968	3.711	8.843	6.058	5.954	9.048	6.933	13.72	14.71	8.184	5.19	2.717	Sardh (-1163)	1.0067	11.9345	0.906015	0.334435
chr6	86404129	86404296	9.899	1.408	2.153	10.13	4.941	4.878	16.21	2.685	9.841	16.08	6.424	5.496	2.931	Tia1 (-6)	1.09013	11.7887	0.0953974	0.64261
chr5	88554154	88554240	4.43	1.224	6.792	17.32	5.53	9.162	11.09	6.737	8.103	19.46	12.07	4.635	5.162	Utp3 (-286)	1.06782	12.9241	11.1832	0.325358
chr7	126503698	126503810	15.88	3.979	4.879	9.505	8.144	3.412	15.21	12.55	13.02	11.67	8.622	9.533	1.106	Atxn2l (-317)	0.864595	11.9616	0.831848	0.785745
chr16	46010222	46010313	6.765	1.09	5.901	10.42	7.234	4.134	12.86	3.508	8.905	22.18	7.013	4.079	2	Plcxd2 (-50)	1.19899	12.042	11.7584	0.236148
chr4	99194085	99194160	5.983	4.081	3.559	10.36	6.033	3.258	21.91	3.567	10.91	13.94	11.77	7.313	2.353	Atg4c (+189)	1.08765	11.8008	0.718923	0.283123
chr10	75131826	75131890	8.019	1.033	3.14	11.82	3.826	7.59	10.64	2.306	6.888	21.71	8.346	4.285	0.1225	Specc1l (-97997), Bcr (+70962)	1.04812	12.3119	11.3476	0.603581
chr2	52424851	52424958	6.033	4.92	3.14	10.05	11.86	5.37	22.43	6.811	11.36	13.63	7.29	4.016	1.026	Arl5a (-4)	1.11462	11.1332	1.94771	0.300472
chr16	8672154	8672281	12.24	4.03	3.499	7.159	3.465	9.644	15.1	5.855	12.9	17.59	7.188	3.455	2.699	Carhsp1 (-65)	1.13568	12.429	10.5122	0.140544
chr7	78913733	78913797	15.2	0.7078	0	9.349	1.026	1.805	11.72	2.71	11.07	15.82	7.638	5.199	1.654	Isg20 (0)	0.960761	11.0595	1.32753	0.939936
chr9	35175973	35176093	4.093	2.377	1.662	13.85	5.338	5.258	22.28	4.444	13.34	11.83	5.91	3.565	0	Dcps (+28)	1.05156	11.2095	1.14313	0.513503
chr11	74832319	74832422	5.824	2.33	1.967	18.28	7.098	4.342	12.69	5.356	13.97	15.25	10.27	6.781	2.833	Mnt (+1451), Sgsm2 (+64689)	0.957459	11.2345	1.38083	0.723914
chr1	87326809	87327014	5.76	5.99	3.018	11.81	6.994	6.011	18.35	3.492	12.17	16.12	9.207	6.957	7.48	Gigyf2 (-91)	1.13049	11.1527	1.73015	0.315099
chr4	141723386	141723514	6.224	6.007	5.324	13.4	8.872	6.734	19.5	4.209	14.46	12.9	5.658	7.456	0	Ddi2 (-31), Rsc1a1 (-31)	1.04785	11.0085	1.61771	0.439029
chr4	133277710	133277789	5.341	3.503	10.06	16.05	6.02	4.649	10.26	2.663	7.098	20.35	2.273	6.874	5.977	Tmem222 (+42)	1.13843	11.8746	11.3072	0.41819
chr6	91515833	91515959	10.4	3.051	2.966	18.19	3.352	7.37	17.94	6.18	7.821	5.469	5.904	7.749	1.463	Lsm3 (-32), Xpc (-12)	0.966772	11.9109	11.759	0.83183
chr1	58973588	58973685	3.506	3.294	3.707	15.77	6.384	7.512	16.26	4.832	19.45	16.46	8.4	8.539	4.245	Trak2 (-207), Stradb (+115)	1.08751	10.61	1.46583	0.502527
chr18	38296556	38296709	6.483	4.009	6.435	16.98	7.539	6.921	13.8	3.944	12.62	14.72	12.91	10.58	0.7433	Rnf14 (-172)	0.969906	11.4055	0.636678	0.503606
chr1	121327771	121327879	8.47	0.7709	5.714	14.98	5.816	5.924	13.51	4.527	19.18	15.01	4.82	3.149	4.11	Insig2 (+199)	1.07379	11.1167	10.957	0.423698
chr16	55822191	55822314	11.21	5.057	7.979	10.16	7.762	6.719	14.4	5.16	9.843	16.15	9.912	5.426	4.967	Zpld1 (-524267), Nfkbiz (+16646)	1.15217	12.1742	11.8014	0.221922
chr7	19830868	19831091	11.64	4.31	2.985	11.84	3.35	7.511	15.11	4.94	17.89	13.32	5.88	5.952	5.297	Bcl3 (-8210), Ceacam16 (+30319)	0.970055	10.8652	1.1303	0.825091
chr9	64022153	64022232	9.426	4.185	3.538	7.705	1.887	6.73	25.08	5.325	4.329	9.645	6.284	7.545	3.207	Smad6 (-134)	1.10018	12.2499	11.6553	0.297126
chr9	66511748	66511842	2.948	6.903	4.143	18.1	7.249	8.445	13.48	6.517	15.72	17.32	8.989	9.453	0	Fbxl22 (+2798), Herc1 (+161269)	1.10508	11.0038	3.3202	0.222699
chr7	28050212	28050306	14.3	4.35	1.069	13.12	2.605	7.909	13.86	7.773	7.276	10.53	2.986	2.606	2.77	Psmc4 (-158)	0.885525	11.7984	0.307709	1.28436
chr4	55349743	55349902	11.14	4.004	2.795	12.98	4.832	8.122	17.66	3.713	11.96	9.984	8.616	6.359	1.401	Rad23b (-220)	1.02024	11.3235	0.554207	0.619257
chr17	34031583	34031787	12.53	2.347	2.34	10.51	13.17	5.322	21.65	5.861	8.397	7.067	9.571	9.518	4.098	H2-Ke6 (-3629), Slc39a7 (-141), Rxrb (-127)	0.97567	11.5328	1.0889	0.753263
chr4	32246964	32247043	5.56	3.89	2.286	10.8	3.841	1.275	19.57	0.8408	16	15.81	1.814	10.23	2.472	D130062J21Rik (+3271), Gja10 (+355756)	1.16313	11.0612	1.2069	0.396815
chr1	133131142	133131244	6.421	3.457	7.635	14.6	9.151	8.828	9.841	3.22	13.51	20.87	5.799	5.377	1.507	Ppp1r15b (+50)	1.14506	12.1873	10.7857	0.156152
chr5	92309982	92310046	9.053	2.028	4.122	10.56	5.49	8.192	22.65	2.364	13.42	9.454	7.544	6.056	4.926	Sdad1 (+10)	1.10193	11.5663	11.2035	0.348748
chr5	127641667	127641737	10.37	5.002	9.444	19.41	5.349	15.4	12.54	2.715	17.64	9.364	8.126	6.791	2.073	Glt1d1 (+9440), Tmem132d (+791375)	1.00949	10.6844	0.710584	0.80104
chr1	172148061	172148140	13.25	4.293	2.107	8.443	5.121	8.886	19.64	4.835	9.868	10.35	5.29	6.874	3.266	Dcaf8 (+86)	1.03572	11.4813	0.0296631	0.326632
chr15	38518259	38518421	12.89	5.2	2.733	9.969	5.871	4.205	10.03	1.64	12.6	18.79	7.423	4.808	0	Azin1 (+926)	1.0318	10.7315	1.31001	0.635161
chr3	130714893	130714991	12.06	5.135	4.006	8.352	4.979	3.385	18.37	5.686	5.441	12.82	3.664	4.627	2.889	Ostc (-5498), Rpl34 (+15395)	1.08891	11.774	0.406754	0.413015
chr6	7057137	7057210	4.788	14.76	4.861	25.14	4.764	5.802	9.671	3.867	12.83	12	3.369	6.988	9.541	Tac1 (-497897), Acn9 (+101170)	0.847655	10.4255	2.20544	1.75291
chr1	119295318	119295381	8.921	3.79	7.502	8.408	3.605	5.689	23.01	2.372	5.351	11.26	3.209	6.965	3.548	Gli2 (-241731), Inhbb (+126898)	0.978478	13.0049	11.1879	0.160527
chr1	119295318	119295381	8.921	3.79	7.502	8.408	3.605	5.689	23.01	2.372	5.351	11.26	3.209	6.965	3.548	Gli2 (-241731), Inhbb (+126898)	0.843742	10.7091	1.31685	0.0132012
chr14	103346758	103346926	15.82	2.769	4.15	8.665	6.633	10.19	19.27	5.426	12.25	7.804	7.113	7.4	0.2241	Mycbp2 (-42)	0.900458	12.1509	12.0925	1.01639
chrX	13041840	13041980	12.15	2.361	1.234	10.82	3.676	4.232	14.41	0.5272	8.451	14.14	5.604	4.571	1.12	Med14 (-279837), Usp9x (-29604)	1.07097	11.5377	0.65602	0.690031
chr15	37007333	37007403	8.254	4.653	5.473	16.91	6.008	4.697	15.12	5.456	10.93	11.23	11.42	6.086	0	Zfp706 (+34)	0.878563	11.8704	0.0302648	1.29559
chr9	74921580	74921658	10.54	2.48	2.738	20.19	7.826	3.911	6.875	3.69	16.66	13.89	20.62	5.11	0.6033	Fam214a (-54492), Onecut1 (+59698)	0.836169	10.7689	0.949503	1.54782
chr6	113077298	113077430	9.685	3.543	7.113	13.97	10.14	8.168	16.39	6.402	14.39	11.43	11.13	5.707	1.783	Setd5 (-1)	0.899784	11.6904	0.325712	0.82033
chr12	51691990	51692115	6.864	2.547	0.4397	11.29	7.027	5.213	18.98	2.436	11.67	14.34	5.673	8.849	0.4392	Strn3 (-139)	1.0848	11.2814	1.04759	0.589371
chr11	30025986	30026098	6.438	5.094	3.168	13.44	5.26	8.516	19.58	0	15.02	11.97	2.964	4.963	2.115	Eml6 (-9)	1.15106	11.0303	1.30707	0.371873
chr1	23256838	23256942	8.084	3.249	5.556	12.28	0.9214	5.127	10.91	6.671	5.423	20.15	3.627	7.981	1.961	Gm6420 (-484)	1.06149	12.2893	11.3448	0.642292
chr5	74535405	74535510	14.54	2.799	2.019	9.867	5.408	2.962	17.29	1.582	7.563	9.693	8.694	6.356	0.5602	Scfd2 (-3716), Fip1l1 (-24)	0.979971	11.666	0.580075	0.949944
chr18	34931984	34932047	9.471	5.694	5.533	14	1.69	7.194	19.23	5.799	9.235	8.656	8.957	8.793	2.141	Etf1 (-9)	0.969273	11.2087	0.564798	0.558408
chr7	45628877	45629000	9.459	7.167	11.02	13.67	9.074	6.936	14.04	6.225	11.13	14.18	5.434	7.269	1.441	Mamstr (-11054), Rasip1 (+1451)	1.12141	11.8071	11.654	0.223533
chr9	21002830	21002932	10.84	2.881	0	10.56	7.341	1.742	19.98	3.69	15.06	9.96	5.68	6.525	0.123	Mrpl4 (+144)	0.965711	10.9331	1.61086	1.07463
chr18	67724301	67724407	8.02	4.228	3.022	9.444	5.022	4.359	18.47	8.79	11.64	15.4	7.188	10.07	7.088	Ptpn2 (+241)	1.06868	11.5075	0.610927	0.320821
chr18	84906372	84906443	6.807	1.466	0.951	9.832	3.724	3.859	10.66	1.975	5.204	24.01	3.953	2.884	5.612	Fbxo15 (-28750), Cyb5 (+55070)	1.14555	11.91	0.0411134	0.582357
chr4	34778329	34778424	7.756	2.359	3.57	14.93	5.305	4.552	15.3	4.506	7.506	13.31	6.845	6.582	5.664	Smim8 (-40)	0.948583	11.8169	0.256079	1.12463
chr2	174473137	174473200	3.574	1.613	1.57	11.68	5.154	2.892	22.84	1.172	10.5	13.19	5.58	5.108	1.245	Slmo2 (-88)	1.08749	11.3301	1.09852	0.469178
chr11	49088418	49088550	15.77	2.913	5.638	9.968	5.108	8.213	21.81	3.383	12.52	3.707	5.395	4.599	0.01188	Ifi47 (+11897), Olfr1396 (+25273)	1.03071	11.6539	11.0526	0.732118
chr7	100159643	100159731	10.11	1.809	4.372	13.22	3.146	7.001	14.14	8.932	15.8	13.75	8.796	9.059	1.23	Lipt2 (+410)	0.931111	11.608	11.3861	0.650846
chr11	118290207	118290465	10.09	1.144	2.526	14.58	3.267	3.806	11.61	1.595	4.667	14.93	5.649	5.96	2.599	Usp36 (-105)	0.988521	11.9253	0.013825	1.02666
chr9	121710319	121710451	5.403	4.795	2.272	8.32	5.901	1.369	20.32	0	10.39	17.16	4.664	8.532	0	Deb1 (-4)	1.18476	11.2614	1.69462	0.285955
chr8	86623945	86624070	10.77	5.73	5.15	12.74	9.085	7.168	16.04	9.521	17.24	11.58	10.32	7.386	1.192	Lonp2 (-35)	0.950041	10.8775	1.25405	0.479626
chr18	68300210	68300356	9.166	3.422	4.84	16.94	7.219	2.049	11.52	3.033	10.17	13.46	5.581	3.657	3.331	Rnmt (-72), Fam210a (+50)	0.964671	11.4639	0.915614	0.815395
chr9	59757026	59757115	9.835	10.5	7.198	19.85	11.96	7.588	12.25	5.349	4.753	9.149	6.103	8.649	10.75	Myo9a (+6175), Nr2e3 (+193046)	0.862869	11.4884	1.31771	1.01515
chr6	134920249	134920381	7.359	3.58	4.092	17.08	5.377	5.7	13.67	7.576	13.43	12.95	11.98	7.798	0	Cdkn1b (-86)	0.850149	11.5005	0.442495	1.30733
chr8	111027684	111027809	12.94	1.988	2.198	14.45	6.899	5.746	9.501	2.303	8.311	14.16	6.385	2.487	8.54	Ddx19a (-29947), Ddx19b (+4004)	0.946105	11.7977	0.207249	0.853567
chr14	59200973	59201099	8.134	2.206	3.938	14.82	7.746	7.746	15.91	2.284	9.904	12.18	9.376	7.749	0	Rcbtb1 (-206)	1.022	11.51	0.395259	0.615152
chr12	54695849	54695939	12.96	3.891	5.408	9.425	6.704	7.06	18.96	6.007	11.15	9.69	6.236	9.081	2.51	Eapp (-13)	1.04532	11.6356	11.507	0.464759
chr10	24535174	24535269	9.927	3.995	3.438	15.17	7.397	8.995	7.681	3.515	8.956	18.24	9.069	6.736	0.2312	Ctgf (-60220), Moxd1 (+311705)	0.94377	11.5098	0.569539	0.557629
chr5	123930615	123930745	8.901	2.59	6.522	11.95	4.231	3.76	16.2	2.484	11.91	13.93	5.107	4.36	1.931	Ccdc62 (-9)	1.08618	11.7916	11.4917	0.511531
chr7	4136870	4136980	8.874	1.892	1.713	11.77	5.001	5.386	15.21	1.51	11.64	15.11	10.15	11.47	0.713	Leng8 (-124)	1.0449	11.4389	0.568529	0.600296
chr6	29467696	29467759	6.272	3.051	2.443	4.44	4.676	3.808	28.36	4.745	14.33	11.89	3.449	4.905	3.585	Gm9047 (-3709), Atp6v1f (+10)	1.17174	11.0561	0.00766114	0.04467
chr4	147673915	147673982	8.318	3.417	1.453	15.17	0.2384	9.881	21.41	5.232	21.53	6.021	10.58	11.02	9.587	2610305D13Rik (-31436), Zfp534 (+28604)	1.04359	10.6618	0.923103	0.60683
chr15	3742595	3742656	20.13	2.87	3.655	8.556	5.178	6.118	9.297	5.868	9.99	12.92	7.643	4.136	0	Ghr (-159396), Fbxo4 (+236947)	1.00609	11.2886	1.00851	0.368764
chr13	93499782	93499868	15.52	1.452	7.048	4.729	4.292	4.925	18.87	2.231	6.558	11.77	2.737	6.293	0	Jmy (-17)	1.11292	12.0626	11.3433	0.464181
chr4	150685567	150685637	8.682	2.501	3.297	18.87	4.233	4.316	11.27	6.063	10.23	12.03	2.371	3.552	2.913	Errfi1 (-169471), Slc45a1 (-33428)	1.05377	11.622	0.848098	0.502792
chr6	119848140	119848289	8.368	3.673	2.592	13.66	6.526	8.518	16.3	3.331	12.26	12.48	4.334	3.914	3.39	3110021A11Rik (+22)	1.06725	11.1166	0.857231	0.619039
chr11	7306422	7306492	11.34	13.71	8.928	26.46	4.005	4.697	11.19	10.39	13.38	1.814	5.345	10.03	7.059	Igfbp3 (-92560)	0.828975	10.0138	2.15706	1.4644
chr3	144720224	144720372	9.51	4.6	6.705	16.98	9.951	3.703	11.99	7.405	12.24	12.32	10.93	8.672	6.211	Sh3glb1 (+25)	0.883045	10.5352	2.6039	0.4565
chr3	116808175	116808244	9.834	6.441	4.62	11.52	7.484	4.143	11.23	3.69	11.98	18.19	7.741	13.83	0.2273	Agl (-44)	1.06175	10.8532	1.56647	0.357589
chr2	29125043	29125155	11.36	4.821	3.225	8.8	2.931	2.407	14.36	3.361	8.711	16.22	7.679	5.828	0	Setx (+107)	1.09806	11.7864	0.31233	0.512949
chr2	3332601	3332664	2.674	3.731	3.888	16.65	6.563	1.928	19.23	6.268	13.76	12.15	4.934	7.052	3.212	Acbd7 (-3535), Rpp38 (+10)	0.913742	11.9735	11.7306	1.40504
chr11	23306302	23306509	8.298	4.673	4.081	12.02	9.258	7.219	20.51	6.926	5.825	9.861	9.789	5.75	5.536	Usp34 (-489)	1.04352	11.9673	0.890438	0.26263
chr19	24477460	24477547	5.266	5.348	1.823	11.09	8.118	5.022	20.1	2.778	12.31	14.21	8.116	2.522	0	Fam122a (-148)	1.14256	11.0784	1.87843	0.353888
chr2	25051150	25051221	8.249	6.036	4.224	7.862	4.324	12.14	19.72	6.497	11.92	14.83	2.423	1.056	0.3645	Nsmf (-3169)	1.15423	12.4385	10.4779	0.106956
chr10	79681785	79682081	8.595	4.467	3.74	14.56	7.026	6.52	12.51	5.161	12.46	14.98	5.938	8.061	2.173	Cdc34 (-262)	1.03809	11.5166	0.74024	0.324577
chr13	69577307	69577495	12.33	3.133	3.667	9.713	5.229	6.617	14.55	3.18	8.31	14.04	4.109	4.979	7.28	Papd7 (-43562), Srd5a1 (+34041)	1.10768	11.8504	0.0151024	0.506677
chr3	122245412	122245706	10.87	3.765	5.896	14.37	8.064	4.554	14.29	10.02	9.371	10.99	12.39	6.07	0.2241	Gclm (+2)	0.904071	12.7279	12.1998	0.797846
chr19	28990304	28990420	11.62	7.114	4.684	11.12	8.413	3.294	16	2.068	15.23	11.78	11.86	1.355	1.663	Cdc37l1 (-132)	0.99	11.0876	1.54691	0.645021
chr7	38217619	38217687	3.89	4.555	1.57	11.54	5.01	2.831	13.94	2.578	13.13	21.15	2.729	2.393	0	Plekhf1 (+10341), 1600014C10Rik (+34436)	1.09884	11.0926	1.23179	0.348287
chr1	64737826	64737887	18.01	7.988	5.74	14.46	0.8145	0.6555	10.44	2.148	6.323	7.593	3.587	4.556	2.867	Fzd5 (-107)	0.859204	11.5008	0.527718	1.7839
chr14	8039174	8039245	13.37	0.08622	2.123	12.97	2.499	4.234	11.08	3.56	9.176	13.05	3.698	5.305	4.794	Rpp14 (-41157), Abhd6 (+36308)	0.921436	11.7729	11.7118	1.28238
chr17	35000852	35000924	7.303	7.278	7.72	12.88	1.38	1.563	20.37	0.9738	10.67	9.908	5.197	10.67	3.813	D17H6S56E-5 (-142), Vars (-99)	1.03827	13.5005	10.5797	0.404352
chr9	90114146	90114210	12.69	5.012	3.631	8.782	12.31	5.693	10.6	8.534	5.014	18.38	11.5	6.799	1.838	Morf4l1 (+642)	1.08713	11.4641	1.49186	0.24008
chr10	123076397	123076523	9.371	6.549	4.1	13.11	3.126	4.443	14.58	4.832	11.22	13.35	9.412	7.313	0	Mon2 (+45)	1.00753	11.3171	0.961747	0.603232
chr1	75168907	75169002	8.75	2.294	3.752	9.515	0.99	4.926	18.46	7.4	10.03	13.66	8.275	3.272	2.469	Zfand2b (+300)	1.03467	12.3481	11.4434	0.478382
chr11	70432493	70432667	7.32	5.953	3.393	15.57	7.822	4.52	15.07	6.808	9.622	12.42	7.891	6.179	4.85	Arrb2 (-73)	0.912169	11.7967	0.502391	1.14263
chr18	10182200	10182278	2.382	4.803	5.355	15.31	7.052	2.392	19.07	2.318	9.683	13.6	4.952	8.86	0	Rock1 (-447)	0.895394	11.6608	0.239065	1.99057
chr5	149184214	149184339	11.41	2.263	3.467	14.39	7.623	5.438	16.04	4.783	12.62	8.516	7.556	7.664	3.639	Uspl1 (-386)	0.832442	10.4711	2.01527	1.78542
chr8	83972609	83972679	4.228	5.999	3.118	21.39	6.87	5.226	15.59	5.694	9.747	9.124	7.803	2.116	9.356	Prkaca (-334)	0.802032	11.9221	0.103914	2.68748
chr5	145140073	145140252	10.75	3.345	4.342	9.377	5.234	3.343	17.86	4.742	7.497	12.34	6.819	6.558	5.354	Bud31 (-234)	1.05716	11.8266	0.189651	0.479782
chr5	143235124	143235209	7.298	0.9795	2.42	11.84	10.15	4.339	21.61	6.708	14.87	9.579	8.041	10.86	3.285	Zfp12 (+4)	0.977235	10.8363	1.66076	0.673844
chr5	31291131	31291194	10.57	0.3693	0	7.832	2.591	3.432	19.74	0.5565	17.24	12.18	6.227	4.818	5.092	Ift172 (-49)	1.05943	11.4119	0.458295	0.896474
chr14	20546153	20546305	9.218	6.662	4.111	10.29	8.487	4.482	17.92	4.152	10.3	12.86	6.68	4.366	3.277	Ppp3cb (+344)	1.11607	11.2809	1.40836	0.337873
chr2	44926939	44927140	6.376	6.055	4.703	14.34	8.148	9.549	20.02	5.15	11.89	9.551	12.58	8.123	4.761	Gtdc1 (-65418), Zeb2 (+186239)	1.04231	11.1502	1.36349	0.286715
chr6	48593811	48593936	9.723	5.485	4.836	13.1	4.429	7.974	15.82	7.454	16.19	11.62	14.51	5.412	4.618	Repin1 (-17)	1.0066	11.1243	0.763107	0.466278
chr11	60537907	60538062	9.538	4.771	1.965	10.27	10.82	8.256	20.97	4.095	13.32	9.482	11.35	2.595	1.771	Alkbh5 (+7)	1.11838	11.2939	0.919661	0.389358
chr2	92008397	92008543	7.268	3.002	0	12.22	3.561	4.007	18.8	4.777	12.71	11.93	9.125	5.184	0	Dgkz (-58043), Creb3l1 (+16032)	1.02411	11.2761	1.04913	0.674866
chr15	73090735	73090850	8.077	2.396	1.775	17.74	8.795	2.447	8.305	9.547	7.258	16.08	2.034	4.372	0	Chrac1 (+401)	1.08925	12.2765	0.431445	0.715951
chr17	69417339	69417409	8.277	5.702	3.14	16.41	6.109	7.405	16.03	3.98	12.55	9.444	4.182	3.892	7.182	C030034I22Rik (-87)	0.849453	10.9687	1.37301	1.7866
chr5	121711409	121711487	7.347	5.463	6.704	22.43	7.894	6.722	10.24	2.437	15.81	10.13	2.998	1.828	3.208	Atxn2 (-161)	0.975806	10.7726	1.35422	0.606961
chr11	74829930	74830002	8.222	5.544	4.405	19.43	5.422	8.146	15.09	4.408	21.16	7.366	7.796	13.66	5.447	Mnt (-954)	1.03176	10.2344	1.755	0.503252
chr4	150685296	150685410	14.53	2.062	4.27	8.52	2.615	4.807	10.39	6.215	9.895	16.64	8.391	6.672	3.481	Errfi1 (-169720), Slc45a1 (-33179)	0.969031	11.7348	11.3435	0.682788
chr3	40846725	40846840	15.33	3.141	2.116	11.26	8.95	6.632	14.55	0.8022	18.11	8.932	10.04	2.544	2.251	Mfsd8 (+102)	1.10366	10.2039	2.63599	0.614806
chr15	101078911	101079090	9.209	2.599	2.43	14.93	5.71	2.73	14.01	2.783	13.32	11.91	8.657	6.323	3.497	Ankrd33 (-36754), Fignl2 (-24602)	0.948561	11.3378	0.862248	1.04558
chr8	70510424	70510487	9.496	1.924	5.957	11.45	6.873	4.349	17.08	2.636	15.38	12.01	8.191	7.081	2.241	2810428I15Rik (-3704), Uba52 (+125)	1.06848	11.4636	0.13183	0.441404
chr7	25221257	25221379	9.175	6.052	4.106	8.726	4.596	7.976	15.86	4.295	10.72	16.26	3.537	6.084	3.542	Dedd2 (-1459), Zfp526 (-133)	1.15215	11.7563	11.4796	0.124924
chr15	102073643	102073893	9.056	4.133	2.814	13.42	6.658	7.547	13.14	5.853	16.96	14.39	7.556	5.895	1.487	Eif4b (-5)	1.04058	10.8424	0.949789	0.395111
chr13	90089657	90089740	5.861	2.744	3.216	9.253	4.981	4.086	12.74	2.223	12.54	22.14	3.272	5.485	1.417	Xrcc4 (-91), Tmem167 (+576)	1.19487	11.1979	11.1575	0.227555
chr1	128244330	128244427	6.687	2.916	3.302	11.3	8.488	5.252	12	2.872	10.83	20	5.709	4.844	2.79	Ubxn4 (+198)	1.13133	11.6058	0.576675	0.163998
chr2	129232611	129232739	10	1.11	3.288	9.157	5.601	3.39	18.45	3.705	16.35	12.27	3.442	5.599	0	Slc20a1 (+33911), Ckap2l (+64537)	1.05334	11.1174	0.824804	0.620578
chr3	97868174	97868340	9.351	3.393	3.349	15.28	6.67	3.908	11.51	7.67	9.861	13.64	6.908	8.15	3.525	Pde4dip (-100248), Sec22b (-32933)	0.956714	11.6724	0.837398	0.68918
chr14	16249236	16249353	4.992	5.892	7.489	10.22	8.235	5.101	19.61	3.517	12.3	14.94	8.963	4.657	0	Ngly1 (+15), Oxsm (+513)	1.18609	12.9713	10.4445	0.264455
chr4	135963642	135963757	5.887	1.789	1.161	10.6	6.959	3.967	18.56	4.107	10.77	14.71	5.261	3.243	1.316	Gale (-1465)	1.05918	11.4475	1.04959	0.664591
chr12	100199406	100199502	5.313	6.173	14.66	21.21	5.841	10.89	11.91	8.534	14.08	11.28	9.807	8.228	4.542	Calm1 (+19)	0.843988	10.9152	0.450709	0.923043
chr8	126945885	126946048	6.558	2.036	3.169	12.43	9.177	6.297	18.33	7.165	13.29	12.33	10.89	7.179	2.863	Tomm20 (-46)	0.940665	11.3861	1.07093	0.697862
chr11	107379596	107379746	8.963	3.673	0.5234	11.71	5.891	10.05	15.82	4.601	10.91	13.15	5.029	4.022	5.061	Nol11 (-190290), Pitpnc1 (+91028)	1.12012	11.2942	2.27274	0.281492
chr16	4643605	4643669	12.42	3.979	5.324	7.163	5.351	3.031	20.89	3.661	4.128	9.133	7.214	7.37	6.667	Vasn (+3696), Coro7 (+36140)	1.13325	12.7841	1.22247	0.415328
chr7	110061373	110061444	13.06	4.035	4.025	5.837	5.723	2.503	22.88	6.991	19.9	7.733	7.587	2.884	0	Zfp143 (-293), AA474408 (-84)	1.0169	12.0028	0.805954	0.860944
chr8	14850648	14850762	11.49	2.406	0.1653	11.52	2.802	7.197	8.347	0.06474	11.12	18.15	2.038	4.972	0.09632	C030037F17Rik (-103278), Cln8 (-37406)	0.915888	11.2115	0.792241	1.25907
chr12	32820250	32820322	13.03	1.224	4.711	7.303	9.612	5.266	17.1	10.71	9.904	12.04	12.74	3.403	0.3268	Nampt (-49)	1.00842	12.5027	0.115899	0.477041
chr6	22356098	22356232	7.308	5.683	5.203	14.57	5.641	9.063	18.45	5.288	12.72	9.142	13.78	3.084	4.191	Fam3c (+1)	1.00447	11.2871	0.942647	0.392016
chr4	40970904	40970981	3.967	0.7632	0.02039	8.544	6.614	6.193	19.97	4.05	9.893	16.98	10.68	10.83	2.343	Nfx1 (+37)	1.14378	11.4887	0.991192	0.228529
chr2	158113914	158114032	10.43	2.905	1.969	4.149	4.421	4.443	13.86	7.975	16.21	20.99	8.899	10.88	0.9704	Tgm2 (+32463), Rprd1b (+85476)	1.18747	10.3495	3.65222	0.0656029
chr9	50835140	50835219	3.368	1.503	6.102	13.34	6.491	7.686	8.05	0	13.7	24.66	4.966	13.38	0.5659	Ppp2r1b (-21744), Alg9 (+60161)	1.19677	11.8722	10.8723	0.219557
chr1	133131269	133131332	8.397	4.878	1.047	11.57	10.31	13.05	18.7	0.9372	13.2	10.7	7.975	10.39	0.4357	Ppp1r15b (+158)	1.05198	10.4862	1.09774	0.136809
chr5	143528025	143528116	7.803	3.875	5.832	12.92	5.791	8.43	7.054	5.84	14.27	21.57	6.284	7.534	2.465	Rac1 (-35)	1.01596	11.6421	0.0331629	0.407811
chr9	25252110	25252182	12.68	5.782	5.67	6.691	5.028	6.541	18.29	13.17	11.16	11.62	15	7.364	7.081	Sept7 (-293)	1.14716	13.0985	12.4526	0.252543
chr16	97962202	97962361	7.139	3.35	1.679	12.66	6.35	5.486	16.13	1.903	10.39	13.34	9.024	6.29	3.29	Zbtb21 (+339)	1.06345	11.3163	1.00503	0.579712
chr10	81545141	81545314	5.915	3.779	3.413	15.15	4.841	6.147	18.13	6.335	18.3	10.06	6.009	8.265	0	Gna11 (-38)	1.09182	10.7252	1.3068	0.407149
chr10	63023981	63024159	8.951	2.325	3.079	15.48	6.839	3.511	13.2	5.753	10.35	11.54	7.832	5.916	4.763	Pbld2 (-442), Hnrnph3 (-176)	0.857268	11.8527	0.380359	1.51788
chr13	92530842	92530913	7.894	2.363	1.57	11.31	6.623	2.816	16.79	2.625	7.464	13.1	9.818	5.923	1.988	Zfyve16 (-10)	1.03572	11.63	0.828443	0.669616
chr2	91265032	91265181	8.59	5.308	3.889	13.69	10.17	8.081	8.863	4.21	13.69	17.94	8.121	3.927	0	Arfgap2 (-186)	1.01321	11.2406	1.17499	0.273953
chr10	81176432	81176578	10.09	2.549	4.883	14.02	13.03	5.802	7.379	4.903	13.12	17.55	10.44	8.315	1.558	Eef2 (-126)	0.952863	11.0608	1.17985	0.342058
chr15	79028372	79028450	8.921	3.516	9.019	18.7	5.778	7.557	10.92	4.636	6.691	10.49	6.306	7.97	3.66	Gcat (-2463), H1f0 (+199)	0.850128	11.7682	11.7074	1.32204
chr4	132463939	132464037	8.37	5.085	10.74	14.51	2.39	7.178	13.74	4.989	14.44	12.39	6.79	7.071	1.641	Med18 (-67)	0.987983	11.7719	10.9042	0.467258
chr7	105811092	105811271	8.707	2.367	3.079	19.01	4.818	2.714	11.87	5.164	6.22	9.306	4.729	3.197	2.774	Mrpl17 (-83)	0.883842	11.4354	1.23032	1.6714
chr8	122282036	122282143	12.92	6.236	8.394	12.67	7.197	5.454	14.91	10.92	15.6	8.343	8.841	11.19	0.1319	Zfpm1 (-51)	1.10745	10.02	0.453208	0.0698868
chr3	113629747	113629813	11.5	4.972	1.642	11.6	3.549	3.927	21.63	2.125	7.809	4.103	1.257	8.172	4.825	Rnpc3 (+369)	1.00489	11.0548	0.888232	0.648721
chr3	104865038	104865101	7.497	1.982	5.982	7.709	3.155	13.56	18.14	5.067	5.66	15.33	2.299	12.22	3.324	Capza1 (-565), St7l (+567)	1.14016	12.6737	10.0023	0.394033
chr2	156992078	156992141	12.57	1.322	4.711	5.612	5.014	7.382	18.32	5.858	12.63	12.09	10.85	4.295	1.369	Ndrg3 (-67)	1.05995	12.3403	11.1652	0.451011
chr9	88438955	88439028	9.662	5.719	0.5377	13.22	6.612	5.457	14.89	6.749	10.88	10.77	4.361	6.161	0.2793	Snx14 (-41)	0.919535	10.9959	1.55042	0.997902
chr2	152830598	152830690	15.3	3.939	7.953	7.855	6.635	5.055	14.91	3.249	6.377	10.47	4.166	8.386	1.773	Bcl2l1 (+22)	1.06169	11.7313	0.272459	0.39278
chr2	181520443	181520516	10.07	3.338	1.549	11.74	0.5834	6.046	14.77	2.78	15.74	11.92	2.708	4.032	3.406	Dnajc5 (-5)	1.03195	10.9542	0.614287	0.806855
chr17	32100338	32100406	6.344	1.765	3.695	10.13	0.8872	3.093	15.77	0.2171	4.862	16.09	5.236	6.883	5.675	Rrp1b (+64272), Notch3 (+66508)	1.16024	12.7339	11.4647	0.434825
chr8	109778556	109778639	12.01	2.995	4.994	10.05	4.832	4.818	9.42	1.067	17.3	16.83	13.94	12.14	0.8032	Ap1g1 (+44)	1.17665	10.525	10.0167	0.227455
chr11	120598360	120598443	3.851	3.245	7.094	13.9	16.44	5.692	22.66	3.557	15.99	7.853	5.981	9.142	0.1512	Alyref (-37), Anapc11 (-19)	0.90035	10.11	3.06344	1.41006
chr3	53463639	53463702	8.647	4.897	3.639	14.39	12.56	3.009	15.24	0.9079	9.081	9.96	10.27	8.039	0	Nhlrc3 (-380), Proser1 (+5)	0.930041	11.3616	1.3958	1.06928
chr14	67008908	67009037	9.983	2.866	1.668	9.849	4.842	4.305	15.9	5.392	12.19	12.49	5.322	5.584	3.478	Bnip3l (-96)	0.994102	11.3672	0.807769	0.760045
chr16	84834910	84834983	10.89	1.61	6.195	17.49	1.531	4.118	11.91	3.109	7.881	7.879	6.035	3.306	3.277	Gabpa (-177), Atp5j (+678)	0.826135	12.1856	11.2451	2.41918
chr4	46870212	46870375	8.635	2.667	2.938	8.2	4.224	3.762	11.43	2.162	14.1	19.89	3.286	4.33	1.323	Tbc1d2 (-220085), Gabbr2 (+121579)	1.12477	10.8437	2.08665	0.342279
chr12	84193983	84194114	8.797	5.767	1.894	11.8	5.283	3.279	8.713	9.183	13.25	18.76	7.417	5.052	3.371	Elmsan1 (-34)	0.883233	11.4383	1.33273	0.830705
chr18	66690915	66691015	6.848	13.35	1.649	29.14	3.105	7.924	4.865	0	0	7.19	0.9053	4.297	2.588	Mc4r (+169507), Pmaip1 (+232361)	0.808783	11.9359	11.9109	2.83162
chr4	146245804	146245867	3.699	11.41	4.561	20.64	10.28	10.3	13.2	16.55	7.306	10.49	9.963	11.84	3.436	Gm13251 (-203187), Zfp600 (+89012)	0.91654	13.8802	12.6552	0.543872
chr10	81266597	81266696	8.301	1.064	0.8882	11.81	1.99	5.595	16.69	0	10.36	11.22	9.571	6.889	0	Apba3 (-1525), Mrpl54 (+287)	1.04525	11.454	0.432904	0.721117
chr1	93754710	93755025	10.8	4.412	7.103	17.14	4.816	6.112	9.868	6.736	10.52	10.2	6.035	8.039	3.361	Atg4b (-37), Thap4 (-30)	0.848386	11.1776	0.735588	1.0614
chr10	42502072	42502144	6.472	4.455	4.405	13.85	9.365	15.96	19.31	4.767	11.21	8.352	7.586	4.469	0	Snx3 (+77)	1.01019	11.2707	11.1272	0.195204
chr8	123254137	123254221	4.686	2.653	3.682	18.41	10.33	5.519	13.96	8.325	9.454	10.92	4.131	14.3	0	Zfp276 (-16), Vps9d1 (+169)	0.980803	11.2496	1.48245	0.684261
chr5	121545909	121546019	5.596	5.71	3.026	12.34	12.82	4.86	16.8	7.213	15.56	13.23	11.4	4.637	1.868	Mapkapk5 (-59)	1.09544	11.2247	1.4778	0.462155
chr2	25557699	25557875	9.697	4.925	2.195	13.12	4.718	4.813	16.81	2.998	9.733	8.33	4.912	3.522	1.943	Edf1 (-60)	1.01049	11.247	0.995631	0.733916
chr17	33929430	33929527	12.72	3.408	7.527	10.31	4.884	4.611	14.02	9.606	9.273	10.86	8.524	4.411	6.21	Rgl2 (-103)	0.942953	12.6709	11.6277	0.670392
chr9	86467139	86467295	9.184	2.339	4.278	16.24	3.481	7.614	13.77	3.383	8.914	8.667	8.85	7.735	1.634	Ube2cbp (-2267)	0.846581	11.3182	0.435564	1.62862
chr4	14826538	14826674	9.238	5.942	0.8082	11.69	6.524	5.249	15.96	3.012	10.03	10.85	9.319	4.544	0.3922	Otud6b (-19)	1.02671	11.1568	1.42929	0.666567
chr9	110781582	110781665	6.999	5.797	3.973	9.955	7.397	4.711	7.448	4.202	11.44	23.33	9.271	5.595	4.744	Prss42 (-16561), Myl3 (+17978)	1.11544	10.9371	1.6305	0.365001
chr7	84152108	84152229	10.27	3.916	4.555	11.78	8.256	4.039	13.23	4.407	14.26	12.41	6.958	7.948	0.4408	Abhd17c (-276)	0.984142	10.9699	1.32686	0.595422
chr4	59331711	59331806	8.435	3.673	3.14	12.26	3.306	5.706	12.23	1.262	18.15	14.76	4.383	9.392	0	Susd1 (+106874), Ugcg (+142502)	1.09065	10.7674	0.630683	0.479213
chr4	82513125	82513321	6.571	4.223	3.341	16.19	3.902	8.478	14.96	6.27	10.66	9.947	8.168	7.938	0.6162	Nfib (-7915), Zdhhc21 (+346450)	0.855153	11.4873	11.411	1.24469
chr17	29385268	29385407	9.378	4.572	1.209	7.705	4.315	5.668	9.91	3.664	12.29	20.61	8.184	8.089	0.2878	Pim1 (-105474), Fgd2 (+24396)	0.894423	10.8824	1.32303	0.901471
chr4	129742283	129742438	10.25	2.773	4.133	6.024	3.148	4.959	19.21	1.298	8.762	12.11	10.29	4.329	4.726	Khdrbs1 (-65)	1.13999	12.1169	11.6948	0.405218
chr5	125390042	125390105	7.847	6.938	1.196	11.43	5.605	12.62	22.32	7.937	11.47	5.988	15.66	6.733	11.3	Ubc (-60), Gm10382 (+752)	0.940966	10.3147	0.873889	0.382838
chr9	44487649	44487716	8.624	1.005	5.39	7.616	3.575	6.013	7.898	1.707	15.6	23.39	7.792	3.002	2.4	Bcl9l (-11453), Gm9830 (+23440)	1.15894	11.2998	11.2899	0.400577
chr9	57073260	57073333	8.325	5.015	6.087	16.55	5.323	10.25	12.6	11.07	15.63	10.03	7.482	11.57	2.75	Sin3a (-3102)	0.994541	11.5292	10.4373	0.268535
chr2	57252736	57252806	7.692	0.7696	3.41	14.58	5.577	4.824	8.034	0.5799	10.6	17.18	6.208	7.575	0.5378	Galnt5 (-745113), Gpd2 (+15093)	0.999219	11.4744	0.333269	0.702856
chr2	11535423	11535579	7.892	4.497	4.147	9.746	6.029	6.93	10.48	5.807	11.83	19.35	8.202	4.653	1.483	Pfkfb3 (-33411), Rbm17 (+67734)	1.03154	11.5092	0.584702	0.355877
chr18	80215756	80215820	8.954	3.405	5.005	6.435	4.769	6.572	15.5	5.997	8.863	16.57	8.534	5.085	0	Gm16286 (+8893), Hsbp1l1 (+31314)	1.18059	12.3354	10.7817	0.157302
chr10	81559366	81559475	12.57	7.268	0.9364	7.616	4.379	5.87	15.54	6.923	12.27	11.7	11.74	5.133	0.03598	Aes (-73)	1.06849	11.1132	0.921516	0.479801
chr4	106911425	106911553	7.048	7.394	5.839	11.52	4.589	4.559	15.59	4.123	10.5	13.26	3.253	7.899	0.7047	Ssbp3 (+19)	1.13268	11.293	1.00025	0.319565
chr2	144010342	144010428	6.554	3.929	4.272	17.2	5.571	2.377	11.98	2.789	7.199	11.64	8.737	7.271	6.585	Rrbp1 (+878)	0.901614	11.5705	0.804605	1.3196
chr9	52091908	52091986	5.611	3.453	3.905	8.302	2.866	2.962	11.9	2.555	13.96	21.55	8.705	3.657	3.72	Rdx (+44006), Zc3h12c (+76164)	1.19739	11.1409	10.7157	0.218454
chr15	102017084	102017147	6.272	2.06	3.14	14.92	1.943	8.416	10.13	2.87	13.71	16.04	2.227	4.15	2.241	Krt8 (-12774), Krt18 (-11100)	1.05862	10.9635	0.299289	0.402244
chr6	143100153	143100214	17.01	3.814	4.17	7.813	6.196	9.906	15.46	4.719	9.963	7.041	5.194	4.975	0	C2cd5 (-77)	0.980396	10.6385	0.673317	0.12118
chr5	143732263	143732482	8.612	5.283	3.477	14.07	5.931	5.566	16.81	3.345	9.362	7.803	9.218	7.914	2.772	Usp42 (-93)	1.08452	10.0834	2.88486	0.372251
chr5	77971318	77971388	8.367	12.73	3.14	20.87	8.416	11.51	14.47	9.806	6.946	3.575	7.889	12.22	6.611	Igfbp7 (-563308)	0.81498	10.4039	2.0625	1.34808
chr4	46138717	46138785	4.839	2.485	5.057	14.67	11.19	8.712	17.94	3.962	12.82	9.804	2.596	3.522	2.134	Tstd2 (-276), Ncbp1 (+138)	0.975143	11.339	1.01261	0.935158
chr3	116594888	116594951	9.646	4.042	2.119	9.477	2.197	7.006	18.19	2.138	20.01	9.93	12.24	12.62	2.141	Sass6 (-88)	1.1052	11.0622	0.517348	0.466335
chr3	40894154	40894271	13.58	6.132	2.791	14.71	7.174	11.37	12.44	0.9778	11.87	6.496	11.21	6.61	1.166	3110057O12Rik (-109)	0.981721	10.3649	0.94761	0.598689
chr1	166379149	166379239	9.114	1.769	7.467	13.41	2.839	6.023	15.36	5.535	9.598	9.338	8.986	6.846	0.008715	Tada1 (+97)	0.948112	12.9216	10.8332	0.759693
chr1	143777226	143777290	5.117	2.64	3.042	12.79	11.15	6.48	18.54	0.9802	16.06	10.74	10.56	10.68	0	Trove2 (-190), Uchl5 (-20)	1.06231	11.1264	1.17647	0.556736
chr17	56935639	56935725	5.108	4.769	3.962	14.01	3.136	3.393	13.62	5.042	13.15	14.44	5.86	4.613	3.192	Mllt1 (-294)	1.02748	11.5389	0.703777	0.37319
chr9	109832984	109833067	3.016	1.947	1.74	11.23	6.585	4.639	19.86	0.8892	6.873	13.05	8.326	3.238	0.4819	Nme6 (+268)	1.10542	11.5492	1.14805	0.372732
chr9	9239026	9239195	5.655	2.405	5.129	11.98	5.743	6.126	15.09	3.854	10.72	14.4	5.651	5.842	1.128	Arhgap42 (-10)	1.08664	11.7437	11.6536	0.549009
chr4	97751839	97751903	5.855	3.004	3.067	10.12	3.466	8.354	13.81	4.872	12.18	17.33	4.503	2.143	5.331	Gm10192 (-568705), Nfia (-25737)	1.08096	11.3796	0.637191	0.428721
chr10	82764079	82764220	8.988	1.91	2.684	17.42	5.311	6.523	10.72	5.784	11.48	9.973	7.309	7.534	6.008	Nfyb (-6)	0.879352	10.8787	1.32446	1.07315
chr11	62602678	62602775	9.592	3.66	1.91	13.47	6.348	5.512	13.11	2.169	11.21	10.9	5.055	7.37	3.865	Trpv2 (+28189), Fam211a (+45796)	0.999739	11.2204	0.914726	0.843344
chr11	75439491	75439555	11.56	5.51	5.422	10.36	12.95	1.62	4.505	5.535	1.367	20.63	2.876	4.257	0	Serpinf2 (-22)	1.13255	10.5102	2.29216	0.429224
chr1	7088798	7089096	10.81	4.084	2.613	7.988	7.277	4.344	14.95	4.012	15.63	13.19	6.815	9.706	0.8054	Pcmtd1 (+27)	1.08897	10.0279	3.46928	0.432802
chr3	47288441	47288511	7.579	13.61	6.707	26.2	6.008	8.421	8.068	2.926	11.09	5.042	6.035	8.254	8.045	Pabpc4l (-840535)	0.822179	10.0836	2.0227	1.87013
chr5	82878218	82878325	11.55	9.909	5.929	12.73	4.843	4.319	5.899	5.691	5.71	16.56	5.88	9.347	3.54	Tecrl (+476923)	1.14014	12.5059	1.01349	0.767934
chr2	49452057	49452146	8.615	2.077	4.411	21.07	7.297	13.28	9.292	5.245	10.43	7.743	6.086	10.85	1.895	Epc2 (+616)	0.802823	10.271	1.42184	1.61696
chr6	55864136	55864207	2.328	17.5	0.1548	25.63	6.248	12.16	10.71	0	1.712	8.049	3.506	1.133	4.805	Ppp1r17 (-153343), Ccdc129 (+27277)	0.876742	10.5582	2.05528	2.55651
chr6	119848385	119848549	6.787	2.695	4.5	10.07	2.37	6.493	14.8	2.34	12.24	15.05	8.814	8.372	3.085	3110021A11Rik (+274)	1.12327	11.8267	11.3028	0.364444
chr11	90355335	90355414	19.43	3.844	5.029	8.312	6.896	8.792	12.65	6.259	5.088	6.288	6.666	5.138	1.211	Hlf (+35520), Mmd (+105899)	0.86512	12.6839	11.2455	0.730341
chr11	6274895	6274958	7.872	3.673	0.8225	8.326	3.183	8.487	25.48	1.845	8.541	4.98	4.335	9.838	3.038	Tmed4 (-57)	1.03035	10.9236	10.7978	0.259436
chr16	23107365	23107484	10.15	8.684	5.344	14.63	5.592	7.43	12.7	3.21	12.61	9.165	7.468	4.271	3.955	Eif4a2 (-19)	1.01262	10.7265	1.44108	0.600307
chr3	5575918	5576077	9.248	5.452	4.177	14.59	4.754	3.381	13.06	3.481	2.263	9.69	7.592	5.612	8.386	Pex2 (+152)	0.923924	11.6821	0.995641	1.12831
chr8	47714261	47714371	10.29	6.779	3.526	11.71	6.033	5.614	18.52	7.582	5.834	6.044	4.074	5.718	2.781	Cdkn2aip (-385)	1.01822	11.7251	0.846983	0.458462
chr6	85856363	85856443	8.029	4.943	3.14	13.18	2.95	2.518	17.74	1.015	20.89	7.563	6.431	12.07	3.725	Nat8 (-24321), Cml2 (+12755)	1.05906	10.6949	1.32481	0.6817
chr2	104590296	104590379	5.766	1.873	3.765	10.7	2.843	4.568	12.37	2.846	8.67	17.64	6.526	2.159	1.852	Cstf3 (-185)	1.05322	12.0573	11.0864	0.443822
chr7	63897059	63897159	9.273	4.065	5.04	14.58	5.394	2.562	13.91	7.897	15.43	8.647	6.654	8.1	3.945	E030018B13Rik (-19748), Otud7a (+452358)	0.951985	10.3181	2.01878	0.398633
chr14	76010898	76010968	6.792	0.8396	3.768	6.327	5.78	4.57	23.05	0.7381	10.37	10.24	6.768	2.09	3.473	Gtf2f2 (-68)	1.15381	11.7317	11.219	0.181114
chr2	128967301	128967413	7.281	2.646	0.9253	8.326	8.619	8.939	19.32	4.909	9.478	11.47	4.217	5.159	4.573	Zc3h6 (-45), Gm10762 (+368)	1.15912	11.2594	0.92981	0.147856
chr16	35363853	35363948	10.18	2.036	5.438	9.843	3.512	3.289	17.97	5.128	9.639	8.374	8.211	7.025	7.34	Sec22a (+17)	0.97481	12.0853	11.6712	0.617768
chr3	51341348	51341414	4.246	1.781	6.138	12.64	4.893	8.662	15.82	6.15	15.96	13.64	7.224	3.823	0.1664	Elf2 (-815)	1.13516	11.0636	0.151204	0.269426
chr2	90277366	90277436	10.44	8.641	6.774	19.98	9.024	7.871	9.119	2.478	13.15	6.776	4.699	10.45	6.409	Olfr1271 (-10973), Olfr1272 (+5172)	0.986752	10.2882	2.02168	0.645373
chr19	6276554	6276823	7.234	4.47	4.851	9.976	3.707	6.15	16.77	5.227	9.953	12.33	7.146	3.596	3.443	Ehd1 (-36)	1.112	11.8137	11.7681	0.23871
chr5	75044750	75044826	14.92	4.704	0.8264	8.52	6.257	1.676	15.52	7.526	9.682	7.323	10.72	6.64	0	Chic2 (-14)	0.868144	11.8602	0.971808	1.22723
chr14	34310342	34310405	9.721	3.44	2.567	11.47	5.183	5.854	14.37	4.51	5.402	10.64	9.652	4.179	0	Glud1 (-353), Fam35a (+129)	1.03357	11.9701	0.668973	0.52329
chr1	133363716	133363784	7.27	1.296	7.066	9.104	7.463	8.886	19.58	5.101	19.97	10.22	7.367	6.077	5.582	Etnk2 (+178)	1.12568	11.3608	10.7895	0.259372
chr2	144183584	144183660	3.936	1.128	3.016	12.06	3.409	0.5067	11.4	3.447	12.07	18.72	6.631	2.309	3.302	Mgme1 (-87278), Banf2 (+150563)	1.05767	11.7776	0.324207	0.447566
chr8	71371688	71371798	12.22	4.742	4.368	16.2	4.517	7.621	6.687	3.892	11.2	11	6.09	4.587	2.496	Ocel1 (+404)	0.857594	10.6693	1.0945	1.10492
chr17	26916819	26916918	5.55	4.329	1.998	13.49	4.105	3.635	11.95	2.982	12.54	15.11	7.94	5.91	0	Kifc5b (-222)	0.998361	11.1543	1.10462	0.56622
chr15	34082656	34082776	4.487	5.428	5.993	18.46	4.14	5.899	10.44	3.383	7.941	12.7	7.946	4.815	3.072	Mtdh (-3)	0.919836	11.4719	0.798653	1.1337
chr8	12711679	12711775	10.43	4.349	4.04	8.607	3.383	2.191	11.37	2.979	14.7	15.66	4.071	3.847	1.577	Atp11a (-45289), Tubgcp3 (-39479)	1.12217	10.5854	0.694661	0.185169
chr17	12992585	12992704	6.073	4.27	5.529	11.54	8.276	5.451	14.31	4.093	9.956	14.14	4.121	8.573	6.103	Wtap (-148)	1.13394	11.4683	0.713157	0.352973
chr19	44388572	44388655	9.067	1.682	0.1892	10.75	1.026	1.713	16.25	1.667	17.48	9.99	5.144	4.934	5.131	Scd1 (+19095), Scd4 (+55522)	1.02488	11.0561	0.828213	1.0052
chr18	7609001	7609276	9.143	2.4	1.113	8.387	3.91	4.341	12.14	1.114	15.65	16.3	13.72	5.332	0	Armc4 (-311238), Mpp7 (+17724)	1.11132	10.653	2.08123	0.546649
chr2	26910584	26910771	6.887	4.616	2.964	8.816	7.772	5.742	12.99	4.203	6.812	17.27	7.375	3.647	2.038	Med22 (-109), Rpl7a (-86)	1.15552	11.8899	0.603996	0.0595908
chr19	7056740	7056835	9.446	0.9666	4.049	15.81	1.681	5.846	11.24	5.632	11.26	9.436	8.576	4.427	0.08256	Macrod1 (+20)	0.800697	11.3159	0.127878	2.19473
chr5	113220676	113220746	11.16	4.303	3.634	13.02	3.042	8.251	9.221	5.852	13.43	12.49	6.078	8.306	0.9412	2900026A02Rik (-57360), Tmem211 (-6198)	0.895213	10.7199	0.957276	0.847774
chr11	51967562	51967676	5.137	5.069	5.372	12.68	7.254	7.275	17.9	2.719	10.12	10.16	7.968	3.657	4.444	Cdkn2aipnl (-42)	1.07887	11.3787	1.00957	0.294519
chr12	44269141	44269224	9.712	3.526	4.067	11.37	6.457	3.658	9.635	2.912	15.78	15.08	11.16	5.155	1.606	Pnpla8 (-3)	1.09331	10.5624	10.4506	0.345938
chr15	102018153	102018263	6.999	5.409	0.3711	11.86	4.969	4.618	10.38	2.885	10.23	16.55	6.406	5.186	1.176	Krt8 (-13866), Krt18 (-10008)	0.976194	11.105	1.56764	0.74384
chr11	118418987	118419216	7.019	2.812	2.091	7.855	3.805	6.623	15.26	3.215	8.549	15.6	5.139	7.234	2.082	Cant1 (-16)	1.15363	11.8999	0.152491	0.172359
chr9	88599735	88599839	7.327	1.978	5.239	9.128	3.464	7.932	13.47	4.772	11.3	15.78	6.616	7.067	3.326	Trim43a (+18751), Gm2382 (+120011)	1.10026	12.0043	11.034	0.378131
chr11	69365055	69365173	4.736	5.458	5.389	9.362	3.624	4.857	14.14	6.302	17.72	17.44	8.158	11.08	4.726	Chd3 (+4292), Kcnab3 (+38856)	1.13675	10.8091	0.0163874	0.138864
chr5	125168212	125168297	10.13	2.953	1.441	17.35	4.05	7.109	7.733	5.275	14.2	10.44	5.769	10.02	3.885	Ncor2 (+10798), Fam101a (+164808)	0.865986	10.533	1.38947	1.28062
chr6	86527166	86527272	8.704	3.465	4.651	16.81	8.839	1.76	9.85	8.773	4.923	10.25	7.288	6.589	3.877	Pcbp1 (-1048)	0.858739	12.2294	0.751216	1.29708
chr9	62122645	62122735	6.647	2.925	5.408	13.38	6.014	5.677	5.998	6.765	11.52	19.51	0.9221	2.743	3.922	Glce (-52084), Spesp1 (+159489)	1.13053	11.8421	11.0389	0.465439
chr16	5136682	5136797	6.571	2.949	1.297	12.08	3.209	4.263	10.61	5.792	13.59	16.27	8.436	5.453	0	Ppl (-4259)	0.957557	11.324	0.867652	0.658438
chr4	40948471	40948537	4.58	3.302	6.067	12.44	10.51	6.104	23.3	7.52	17.46	5.206	6.607	8.061	0	Bag1 (-261), Chmp5 (+97)	1.10468	10.2684	2.18086	0.216378
chr8	72548277	72548431	7.258	3.49	5.873	13.99	0.9679	6.309	14.21	2.708	8.125	10.02	3.762	6.969	0.06112	Med26 (-44)	0.926639	10.8847	1.452	0.997021
chr1	136346121	136346199	8.296	2.59	5.133	17.55	9.35	5.032	8.625	3.927	12.67	10.99	6.229	5.532	1.458	Camsap2 (-56)	0.93865	10.8391	1.27352	0.582837
chr8	106210955	106211025	8.659	3.673	3.589	18.69	3.802	4.655	10.08	4.217	7.525	8.004	4.095	6.138	0	Slc7a6os (-57), Prmt7 (+54)	0.807082	11.0962	1.14219	2.20754
chr4	44756493	44756613	10.14	3.173	2.277	7.134	2.573	2.505	18.07	5.874	7.914	10.01	7.33	4.815	0	Zcchc7 (-15)	1.04155	11.9186	0.197498	0.515566
chr18	6136544	6136631	9.645	2.772	0.4693	5.121	6.16	5.464	9.628	1.527	4.639	20.95	7.579	0	0.2975	Arhgap12 (-490)	1.13971	12.0917	11.8366	0.393454
chr12	116280769	116280879	7.013	4.04	1.599	10.14	3.904	2.572	17.02	4.361	7.676	11.17	6.666	3.524	6.816	Esyt2 (-398)	1.06501	11.5463	0.965114	0.509742
chr18	10610082	10610208	8.971	3.595	2.767	7.791	5.69	4.89	9.755	4.979	8.515	18.79	4.838	4.876	5.005	Esco1 (+207)	1.00114	11.5328	0.623583	0.63216
chr18	32162947	32163064	7.885	3.6	4.214	15.28	1.577	11.35	11.85	13.03	15.02	10.26	7.763	5.891	5.148	Map3k2 (-83)	0.937336	11.0248	10.7664	0.592061
chr5	33018910	33018978	7.177	0.9003	0	11.35	3.758	2.178	14.31	7.706	6.483	12.41	3.062	6.883	0	Ywhah (+128)	1.00485	12.3384	12.1776	0.807597
chr3	84582707	84582770	8.222	1.749	0.7477	9.148	1.943	5.595	17.97	1.933	8.284	9.842	10.18	4.324	0	Arfip1 (-114)	1.06628	11.7596	0.39725	0.489335
chr1	75317475	75317671	3.984	2.38	4.614	15.1	7.161	2.894	12.23	6.373	12.3	13.85	7.021	6.175	2.541	Dnpep (+64)	1.01539	11.3711	1.44443	0.395918
chr15	91049868	91049970	10.03	2.377	7.235	9.954	7.62	4.85	14.94	0.8321	6.578	10.14	4.083	1.828	7.566	Kif21a (+29)	1.09864	11.9346	11.5605	0.411898
chr19	53390663	53390773	7.4	2.304	3.098	9.454	7.421	3.231	16.47	3.338	8.87	11.7	7.174	3.707	3.308	Smndc1 (-145)	1.05573	11.5672	0.862218	0.54376
chr4	149081660	149081771	5.418	2.791	3.296	11.4	4.524	3.069	9.481	4.339	13.97	18.68	4.649	13.57	0.4522	Pex14 (+18160), Casz1 (+277287)	1.07182	11.1467	1.02474	0.44101
chr7	140717756	140717820	8.757	0.4591	1.227	6.03	2.606	7.22	8.824	3.171	16.87	21.36	7.874	5.371	6.176	Cyp2e1 (-45951), Olfr541 (+13623)	1.0715	11.7925	10.953	0.486519
chr10	52417434	52417557	5.568	5.973	3.319	13.95	4.891	5.274	13.29	3.555	7.998	12.15	4.048	6.243	2.283	Nus1 (-51)	0.974626	11.2813	0.964203	0.919523
chr3	151891772	151891850	8.598	2.763	0.765	9.929	3.867	1.101	2.829	1.372	9.433	23.51	5.378	2.766	0	Ptgfr (-54181), Gipc2 (+274419)	0.966451	10.4972	1.23188	1.39601
chr2	155692360	155692423	10.45	1.224	5.035	4.769	5.323	6.065	16.55	0	9.107	13.07	12.05	1.915	0	Trpc4ap (-8)	1.14555	12.5673	10.8144	0.282987
chr10	30618308	30618581	7.872	2.023	4.573	11.12	3.77	3.667	12.58	3.771	11.71	13.2	5.958	3.59	3.821	Hint3 (+34)	1.04679	11.6925	11.5752	0.572982
chr2	180171372	180171510	5.271	2.715	2.162	15.95	9.953	11.4	9.956	3.984	14.12	13.59	6.145	11.16	1.603	Adrm1 (-44)	1.05676	11.0588	1.50468	0.233763
chr15	82708104	82708174	7.962	4.058	2.782	15.76	3.245	3.639	7.797	5.061	14.45	13.23	9.958	7.679	4.818	Cyp2d37-ps (-17640), Cyp2d40 (+56044)	0.85683	10.78	1.28515	1.22966
chr12	116281005	116281203	9.327	4.477	4.639	7.234	4.66	4.862	16.03	3.131	7.596	12.14	7.613	4.663	1.604	Esyt2 (-118)	1.14545	11.9264	0.0422028	0.312897
chr8	94012671	94012740	7.917	3.336	8.079	13.35	2.777	4.271	15.6	3.931	12.78	7.687	17.01	4.24	0	Amfr (-43)	0.911747	12.9022	10.8042	0.847633
chr15	43282755	43282848	10	4.239	1.283	6.67	6.964	2.532	16.34	2.262	9.376	11.47	5.305	1.592	4.048	Eif3e (-66)	1.11667	11.4826	1.02457	0.612462
chr16	23294370	23294493	13.06	2.18	1.864	8.918	2.352	3.239	9.308	1.995	7.445	13.18	7.09	5.485	1.932	Rtp1 (-134701), BC106179 (-69064)	0.971171	11.3299	0.486897	0.924337
chr1	75124991	75125068	3.926	1.224	3.161	13.09	5.393	3.001	12.42	1.198	5.304	15.01	2.645	0.2137	1.935	Nhej1 (-78391), Slc23a3 (+8860)	1.15295	11.8405	1.14985	0.447263
chr13	17805391	17805454	3.524	3.693	5.084	13.18	2.901	5.007	16.48	6.004	13.74	11.26	4.143	5.804	3.573	Cdk13 (-326)	1.05397	10.8058	1.10753	0.53219
chr14	75845236	75845395	7.684	2.995	3.772	12.4	3.46	4.154	9.163	5.443	8.939	15.16	8.113	2.886	2.743	Tpt1 (+223)	0.972711	12.0281	11.9693	0.613923
chr11	52098695	52098838	3.523	2.355	2.251	10.91	8.922	6.483	20.49	2.335	11.79	9.468	3.619	1.918	1.508	Ppp2ca (+86)	1.12346	11.1316	1.29776	0.381067
chr8	35206335	35206471	6.297	1.629	4.145	9.827	3.458	5.456	12.1	4.504	15.52	16.16	4.504	2.622	1.471	Tnks (-240713), Ppp1r3b (-169338)	1.11253	11.3425	10.7492	0.373958
chr19	21272048	21272111	5.473	3.809	3.34	12.35	7.351	7.546	15.74	4.276	9.621	10.79	6.466	6.153	0.01245	Zfand5 (-198)	1.04997	11.2893	0.986787	0.447295
chr17	46735564	46735634	6.163	2.379	4.262	17.21	3.853	4.316	8.407	7.222	10.6	12.49	6.639	2.298	0	Gnmt (-6431), Cnpy3 (+16615)	0.967811	11.3079	1.02271	0.713096
chr13	38204871	38204937	4.89	3.024	6.78	11.81	4.624	3.276	16.27	3.131	16.26	11.29	7.155	1.468	2.745	Snrnp48 (-35)	1.16564	11.4936	11.4485	0.294017
chr1	38241900	38242124	7.028	1.082	2.51	10.19	1.03	4.84	10.81	1.549	10.95	16.22	6.372	5.256	5.042	Rev1 (-112350), Aff3 (+422943)	1.02857	11.5062	11.439	0.676408
chr5	149051336	149051500	7.929	2.568	2.566	11.83	6.167	3.269	12.63	2.835	11.44	11.82	4.066	5.53	4.256	Hmgb1 (+1622), Gm15409 (+92140)	1.04019	11.2944	0.833769	0.636139
chr12	17544650	17544726	6.422	4.575	8.264	12.78	5.697	6.119	18.02	3.205	13.35	6.929	11.4	1.588	4.438	Odc1 (-185)	1.01981	12.9537	10.3505	0.537694
chr6	128438638	128438792	4.58	3.896	5.791	11.79	5.669	9.386	18.29	7.141	11.13	9.459	2.88	12.11	1.528	Fkbp4 (-38)	1.07065	11.6837	10.7074	0.197055
chr13	106947092	106947172	3.936	6.612	3.847	12.85	3.726	9.59	21.5	3.875	9.157	5.789	4.64	5.485	0.5294	Dimt1 (+3)	1.03058	11.1618	0.640674	0.236846
chr17	24212042	24212204	9.932	2.101	3.819	12.93	3.352	3.968	10.97	1.367	7.763	10.24	3.167	5.011	3.854	Ntn3 (-2736)	0.982487	11.5534	0.21673	1.00424
chr4	116557567	116557669	6.112	2.773	3.756	10.28	7.098	3.34	14.25	4.486	11.49	13.42	7.929	2.187	0	Tmem69 (-1682), Gpbp1l1 (-40)	1.13072	11.5031	0.615069	0.315716
chr5	63968938	63969079	5.404	3.621	3.675	17.97	5.814	3.981	8.558	1.282	7.437	12.09	3.039	5.433	1.869	Rell1 (-104)	0.95675	11.2804	1.16236	1.04334
chr5	33274983	33275053	2.991	1.872	1.795	14.71	0.7605	4.041	11.61	2.346	4.399	14.7	8.363	7.914	5.266	Ctbp1 (-14)	0.951549	12.1913	11.609	1.53823
chr8	70529845	70529940	9.363	1.611	1.653	13.43	0.9339	7.015	9.804	3.205	10.75	11.3	8.338	9.815	3.963	Ell (-9782), Fkbp8 (+2047)	0.822689	11.1754	11.1119	2.02507
chr3	89773432	89773512	6.573	2.969	4.2	12.21	3.726	4.332	19.31	5.72	6.159	5.789	2.301	4.251	0.07843	4632404H12Rik (-232), Ube2q1 (-137)	1.02756	11.909	11.5916	0.402126
chr11	109485552	109485616	9.053	4.4	2.453	8.539	2.384	6.989	14.5	2.133	13.83	11.73	6.554	7.599	0	Slc16a6 (-11986), Wipi1 (+125848)	1.13836	11.1164	0.1068	0.364667
chr17	56120362	56120472	7.986	1.825	2.113	16.53	7.098	4.605	8.176	3.355	10.61	11.1	1.015	6.848	4.791	Plin5 (-2821)	0.990611	11.1742	1.21325	0.696842
chr15	85635070	85635134	7.527	0	4.465	8.661	2.329	4.258	11.31	10.09	5.369	16.28	15.32	5.199	4.975	Ppara (-100674), Wnt7b (-57032)	0.982684	13.4326	11.6196	0.659748
chr6	124745568	124745679	10.88	7.28	6.62	13.38	3.757	9.807	12.56	7.131	14.95	6.915	7.843	7.231	6.098	Grcc10 (-4250)	0.981528	10.5378	0.768929	0.506897
chr13	107923348	107923458	7.643	5.12	0.9707	5.793	2.226	7.836	16.57	2.248	7.278	13.72	8.175	2.46	2.068	Smim15 (-123021), Zswim6 (-33339)	1.1412	12.3789	11.4134	0.133812
chr8	125012905	125013039	5.968	3.171	3.375	5.654	2.092	3.36	18.09	7.931	8.745	13.98	11.63	3.861	1.024	Tsnax (-25)	1.11909	12.6706	12.1994	0.0954258
chr3	31094944	31095016	3.28	5.306	6.717	17.3	3.648	8.886	12.56	6.663	4.682	10.48	9.095	4.571	2.2	Skil (-81)	0.89751	13.3046	10.9403	1.13574
chr2	117120987	117121080	3.267	2.225	0.6078	15.79	5.381	2.962	9.186	6.904	7.528	15.34	3.618	6.35	4.217	Spred1 (-340)	0.964833	11.823	0.965585	1.03769
chr11	109995765	109995859	4.623	4.311	5.429	20.03	6.513	6.192	7.977	2.827	7.121	10.91	8.17	4.143	0	Abca8b (+33)	0.862421	11.1123	1.23754	1.32118
chr1	51915936	51916050	10.33	2.449	2.176	14.13	3.673	4.521	6.286	4.402	11.83	12.74	12.18	4.234	3.096	Myo1b (-65)	0.807143	10.9171	1.01874	1.37678
chr4	141741960	141742091	8.112	2.094	4.123	8.077	1.666	6.275	10.14	4.944	14.13	17.12	5.839	7.69	1.443	Agmat (-4646)	1.0647	11.4426	11.2652	0.452683
chr14	49066399	49066543	6.549	6.343	3.686	12.01	4.473	5.945	15.73	5.651	12.37	9.156	7.293	5.523	3.099	Ap5m1 (-24), Exoc5 (+182)	1.06277	10.8898	1.63212	0.381103
chr4	47239252	47239338	8.604	3.417	1.095	6.957	8.212	5.924	13.02	1.244	5.427	14.81	7.228	1.828	0	Tgfbr1 (-113927), Col15a1 (+31134)	1.12708	11.5662	0.452093	0.100784
chr12	72536217	72536324	8.372	5.607	1.966	11.5	7.197	6.326	7.939	5.484	8.952	15.53	7.403	9.518	4.662	Pcnxl4 (-86)	0.915719	11.2484	1.45997	0.656015
chr5	123014867	123014931	3.272	2.659	2.576	11.47	1.58	12.57	11.99	3.892	8.205	16.55	5.752	11.14	0	Orai1 (-175)	1.04938	12.4934	10.3429	0.513642
chr5	151368614	151368768	8.322	4.532	4.486	11.5	4.517	3.77	8.706	5.511	9.387	14.72	5.545	5.224	1.182	D730045B01Rik (+481)	0.983104	11.6376	0.502048	0.570418
chr14	31019024	31019191	6.335	2.397	0.8556	10.86	7.077	7.37	16.07	2.718	10.28	9.919	7.472	4.062	0.02818	Pbrm1 (-30), Gnl3 (-19)	1.07952	11.2303	0.92765	0.522136
chr4	45530914	45530999	5.723	0.5474	8.682	16.3	4.468	5.68	5.932	6.642	9.4	15.18	9.319	5.507	4.346	Shb (-627)	0.906388	11.9401	11.2325	0.67392
chr11	74023163	74023233	6.882	14.78	3.185	19.8	4.462	9.415	6.153	3.295	4.005	10.27	4.052	7.366	0	Olfr398 (-33139), Olfr139 (+22074)	0.914398	11.7818	11.3375	0.757995
chr6	113046176	113046338	6.628	3.673	2.481	14.47	8.39	6.217	12.27	3.736	6.823	9.66	9.742	8.916	5.664	Thumpd3 (+32)	0.908627	11.3909	1.10157	0.876334
chr9	85749325	85749481	6.691	3.006	1.862	10.47	5.221	0.8165	12.72	5.334	13.92	13.12	7.099	6.001	0.005028	Ibtk (-69)	0.990411	11.1419	1.2656	0.698229
chr9	59617225	59617332	8.004	1.121	5.107	6.185	1.99	2.505	15.28	5.001	8.755	13.53	6.754	3.828	2.602	Parp6 (-5)	1.08946	12.2756	11.1372	0.416675
chr2	26122701	26122854	7.1	3.969	8.888	10.06	6.715	7.666	18.6	7.754	11.85	7.214	8.244	5.664	3.763	Nacc2 (-30601), Lhx3 (+83797)	1.01981	12.5909	10.1991	0.192196
chr11	120378774	120378885	7.943	1.875	5.97	11.43	3.549	3.362	12.61	10.31	14.73	10.99	11.76	8.746	1.237	2310003H01Rik (-66)	0.814965	12.3675	11.9381	0.670056
chr11	31838627	31838691	8.413	1.282	2.601	7.224	0.915	5.924	11.94	2.047	9.446	15.32	6.177	3.885	5.061	Bod1 (-166774), Cpeb4 (-33552)	1.11075	11.8792	11.0187	0.425014
chr1	180726019	180726100	6.667	0.6197	3.877	13.43	5.521	10.75	15.25	6.879	7.703	7.539	8.867	4.56	1.501	Acbd3 (+17)	0.937073	11.9445	11.5886	0.590186
chr2	128807890	128807960	7.872	8.046	9.646	17.21	6.084	7.828	7.627	0	8.567	10.14	7.544	6.791	5.042	Tmem87b (-10193), Mertk (+108969)	0.977377	11.1904	0.498553	0.465593
chr15	12205010	12205085	4.093	3.265	2.826	8.979	6.152	5.825	15.9	7.381	5.726	13.82	7.242	9.385	2.092	Mtmr12 (+20)	1.13937	12.0031	0.567358	0.193607
chr9	63399292	63399422	6.128	3.24	4.976	9.504	4.068	10.55	17.43	7.835	9.4	9.654	10.93	7.932	4.115	2300009A05Rik (-113)	1.00979	12.7238	10.4871	0.253869
chr13	43304915	43304988	6.944	1.728	2.323	10.43	4.424	9.211	8.517	1.592	8.17	16.81	4.898	3.832	1.88	Gfod1 (-780)	1.0311	12.2185	11.2365	0.499644
chr13	43560199	43560321	9.033	3.884	4.981	7.675	5.76	6.337	13.8	1.981	7.306	12.18	10.18	1.858	4.121	Mcur1 (-69)	1.16401	12.223	11.7201	0.278258
chr11	116030501	116030638	7.056	3.039	5.903	9.066	4.456	3.167	15.63	4.579	4.969	10.86	5.958	1.682	1.798	H3f3b (-2608), Unk (+248)	1.09223	12.2911	11.5762	0.326049
chr19	11965573	11965819	8.825	3.459	0.683	7.765	3.946	3.203	16.12	1.665	10.6	9.899	4.22	4.021	2.841	Osbp (-148)	1.0863	11.3395	0.807202	0.65597
chr2	167062688	167062810	8.13	2.268	5.92	9.427	4.683	5.123	9.356	10.62	13.2	15.61	7.495	4.616	2.636	1500012F01Rik (-185), Znfx1 (+266)	0.889214	12.4238	11.4029	0.534672
chr12	110024417	110024518	7.872	1.346	2.363	4.449	1.827	5.558	12.95	1.443	5.729	17.23	7.35	5.539	0	Rtl1 (-424138), Dio3 (-254600)	1.15956	12.4238	10.9403	0.329006
chr13	34652953	34653068	14.57	1.586	1.516	9.021	4.876	3.748	10.5	6.835	9.146	8.379	4.881	7.234	0.1773	Pxdc1 (-340)	0.828965	11.4193	0.94138	1.31536
chr5	130079434	130079526	8.727	2.555	4.369	8.953	6.519	4.636	17.33	4.813	9.9	7.429	8.856	7.194	10.13	Tpst1 (+110)	1.02701	11.6346	0.169158	0.389081
chr10	91181760	91181883	3.405	3.185	1.353	9.097	3.65	11.5	18.14	2.295	11.58	11.78	5.312	6.139	1.46	Tmpo (-10240)	1.08009	11.6775	10.9367	0.114672
chr14	120137969	120138086	4.279	2.491	8.227	10.81	7.068	4.152	15.57	7.475	11.12	11.76	3.92	4.516	7.83	Mbnl2 (-137641), Oxgr1 (-95593)	1.18569	12.0713	10.4287	0.141438
chr13	8996014	8996161	7.593	4.423	3.76	13.35	6.458	5.642	8.588	5.924	13.11	12.84	3.161	3.744	3.399	Gtpbp4 (-71)	0.979586	11.3054	0.914398	0.436266
chr2	32236539	32236615	7.147	5.896	4.793	11.04	4.973	2.962	18.44	1.093	8.295	5.725	7.087	8.661	2.105	Pomt1 (-13)	1.15925	12.8913	12.549	0.201434
chr1	86937033	86937182	10.7	7.124	6.924	14.32	4.073	2.873	7.286	3.777	3.905	10.04	4.638	11.19	6.827	Alppl2 (+152820), Dis3l2 (+233304)	0.855303	11.7183	0.362316	1.27193
chr12	83617436	83617499	10.1	6.355	3.39	6.208	0	4.349	16.46	2.665	7.1	9.575	10.25	8.881	6.81	Zfyve1 (-20321), Rbm25 (-14784)	1.0728	11.0488	0.366589	0.484058
chr7	101310828	101310911	4.192	2.419	1.192	7.677	1.86	2.819	12.85	3.712	7.498	17.6	3.817	5.044	4.186	Stard10 (-10243), Atg16l2 (-8782)	1.11814	11.7548	0.386386	0.372645
chr11	22512586	22512767	8.594	5.215	5.049	8.443	5.706	5.883	15.57	6.392	8.981	9.688	7.077	8.081	2.479	Tmem17 (+589)	1.06767	11.6313	0.231988	0.218518
chr14	36968769	36968898	4.406	3.303	0	13.52	7.634	5.189	14.74	4.205	9.398	9.598	2.339	3.472	4.505	Ccser2 (-57)	0.843076	10.9816	1.79282	2.18728
chr4	64862759	64862912	8.901	8.651	1.149	17.73	5.637	9.777	8.484	4.341	9.915	7.067	5.246	5.21	10.18	Tnc (-815821), Pappa (-261338)	0.82062	10.0285	2.31012	1.56915
chr4	63257463	63257549	5.181	2.036	2.227	9.819	3.982	2.6	12.36	2.21	9.686	14.64	7.877	1.637	2.244	Orm1 (-87054), Col27a1 (+42071)	1.12385	11.5277	0.630538	0.485266
chr11	90249409	90249479	5.128	4.793	9.578	19.39	6.084	7.13	9.153	6.405	10.9	8.324	6.272	4.257	2.779	Mmd (-32)	0.851468	10.7638	1.17079	0.960326
chr2	180710014	180710078	12.69	1.99	1.766	5.949	1.553	3.98	17.39	3.69	11.34	5.953	10.23	7.599	2.328	Gid8 (-2500)	0.975972	11.6691	11.6389	0.927226
chr10	123196928	123196991	8.047	3.012	6.954	14.99	3.774	7.123	15.86	7.234	11.42	3.083	9.46	10.94	0	Usp15 (-25)	1.09211	10.3859	0.606132	0.206549
chr13	98815162	98815293	5.48	4.841	4.375	15.33	2.005	7.077	12.7	7.986	7.522	8.268	5.31	5.806	0	Fcho2 (+221)	0.828648	12.9237	11.0416	1.42211
chr6	115544577	115544674	4.398	1.83	2.493	10.09	5.433	2.916	13.36	4.356	5.447	13.9	4.106	4.26	0	Tsen2 (-38)	1.03721	11.7558	0.732392	0.796434
chr6	67014924	67015000	9.861	3.995	5.537	5.657	2.008	3.118	12.49	2.962	8.573	13.71	4.685	9.43	1.961	4930597O21Rik (-118441), Gadd45a (+22444)	1.11319	11.8398	11.6139	0.332906
chr12	104386095	104386215	5.445	0.5102	1.505	7.177	1.922	7.343	10.63	4.69	12.16	18.44	7.544	1.981	0	Serpina3m (-1009)	0.954135	11.0508	0.512523	0.679409
chr7	64287461	64287552	6.574	1.52	2.088	9.777	9.964	2.783	10.8	5.495	10.76	14.49	5.488	7.474	1.172	Mtmr10 (-163)	1.01001	10.7189	3.60873	0.341668
chrX	44737246	44737348	6.884	14.62	4.526	17.45	6.019	7.754	6.816	5.354	2.161	10.47	7.988	3.836	3.768	Dcaf12l2 (-368955), Dcaf12l1 (+52900)	0.985642	12.34	12.0255	0.585836
chr2	19657664	19657727	6.148	1.71	2.567	8.346	9.295	2.116	17.55	10.95	17.54	9.575	12.65	3.163	0	Otud1 (-366)	0.942081	11.7296	1.16642	0.403027
chr16	90284449	90284558	6.023	2.494	3.76	12.11	4.347	6.182	13.03	5.078	13.35	10.45	3.82	10.74	3.511	Scaf4 (-79)	1.04174	10.6999	1.05577	0.558604
chr4	123282589	123282721	5.164	2.263	2.45	10.11	6.708	6.676	12.98	5.088	14.25	13.33	3.921	4.626	3.565	Pabpc4 (-256)	1.14512	10.5599	1.5321	0.29866
chr4	49403781	49403888	2.001	11.82	6.545	21.15	2.438	3.336	9.758	4.501	0.7573	8.657	9.532	10.22	7.103	Acnat2 (+4316), E130309F12Rik (+344553)	0.829259	13.0956	11.3778	2.3343
chr17	26939624	26939708	7.122	4.14	3.215	9.621	2.197	5.078	12.57	5.667	12.27	12.23	6.502	1.872	0	Syngap1 (-1786), Cuta (-198)	1.01115	11.2606	0.40697	0.486892
chr7	25659116	25659190	5.106	3.508	0	9.521	3.789	4.483	18.73	2.693	7.928	8.126	4.282	6.72	2.438	Bckdha (-392), Exosc5 (0)	1.06252	11.1756	1.3621	0.429
chr7	45395673	45395752	4.962	1.767	1.709	5.475	3.976	6.618	20.98	0.6306	9.663	10.05	3.132	2.268	3.306	Snrnp70 (-21)	1.17811	11.6211	11.0873	0.06489
chr9	97107147	97107229	10.02	8.556	7.774	17.18	7.12	6.412	8.146	2.79	1.601	6.104	6.974	2.497	7.747	Spsb4 (-88345), Slc25a36 (+3969)	0.893928	11.76	0.677834	1.00509
chr17	17625073	17625180	5.062	1.877	1.908	11.14	4.378	2.865	10.52	1.328	2.529	14.7	3.483	0.4614	2.456	Lnpep (-638)	1.11089	12.0059	0.355842	0.57025
chr9	61379242	61379305	6.697	3.187	0.4486	6.845	1.436	2.868	14.78	1.699	14.05	13.1	3.928	7.749	0	Tle3 (+5889), Rplp1 (+535264)	1.14738	11.2261	0.737134	0.510278
chr2	122118377	122118440	6.123	1.224	2.492	11.68	6.619	5.454	13.37	3.69	13.07	10.23	4.694	4.905	0.4855	Spg11 (-23)	1.10188	11.3657	0.179903	0.745061
chr11	69418865	69418968	4.479	0.951	3.72	14.96	3.377	6.528	8.57	1.702	16.73	13.34	7.207	6.958	2.178	Kdm6b (-5242), Dnahc2 (+130191)	0.99697	10.9762	0.367729	0.559071
chr16	94526420	94526505	7.687	3.169	0.8313	7.999	4.384	4.792	14.24	2.496	10.96	11.42	6.923	7.206	2.076	Dscr3 (+367)	1.09816	11.3031	0.804289	0.505947
chr13	44302049	44302179	9.18	0.6687	3.479	9.653	2.32	3.828	4.792	1.292	13.13	17.63	5.699	3.375	2.486	Jarid2 (-429157), Cd83 (+517007)	0.975484	11.0657	0.379096	0.927893
chr7	45717972	45718097	8.313	3.056	4.422	10.24	4.287	3.175	12.32	7.321	15.65	10.31	7.761	7.781	0	Fam83e (-3177), Sphk2 (-33)	0.97872	10.667	1.06787	0.51155
chr9	123529694	123529825	5.084	7.085	2.17	10.66	8.087	7.541	9.166	7.831	9.316	16.27	7.36	11.4	1.796	Sacm1l (-122)	0.919032	10.6769	2.5457	0.401082
chr8	120416881	120416973	3.474	5.137	3.413	12.05	7.869	7.196	17.1	4.131	15.43	8.526	6.117	5.982	0	Fam92b (-239461), Gse1 (-71520)	1.00532	10.5595	2.08833	0.565665
chr4	130715238	130715304	11.02	2.82	0	7.496	6.614	4.937	11.65	2.907	7.858	10.98	2.195	6.649	0.4278	Sdc3 (-77266), Pum1 (+51950)	1.06049	10.8194	2.76232	0.30943
chr2	104816993	104817063	4.273	7.224	12.56	18.82	5.476	4.443	11.2	1.107	8.868	6.83	9.01	8.436	3.473	Qser1 (-332)	0.946126	10.6979	0.94771	0.625238
chr1	161876821	161876912	6.488	2.543	1.95	11.63	5.401	4.98	14	0.4461	12.16	8.886	4.941	3.456	0.5861	Suco (-206)	1.07608	11.2138	0.755358	0.779097
chr1	125560910	125561051	7.068	2.631	5.702	13.96	1.774	6.533	10.06	7.001	6.138	9.828	4.633	7.313	2.614	Slc35f5 (-35)	0.844416	12.5986	10.9736	1.40344
chr10	82629702	82629857	6.785	4.771	1.712	9.642	1.855	3.067	14.72	5.654	3.879	9.591	5.354	2.807	2.378	Tdg (-79)	1.07483	12.0568	0.581775	0.530568
chr5	38561665	38561824	5.644	3.072	1.136	12.33	6.663	4.434	12.28	6.673	7.818	10.47	8.294	5.428	7.695	Wdr1 (-79)	0.864692	11.7952	0.800613	1.34516
chr9	107296723	107296928	4.493	4.008	2.351	8.484	4.882	2.94	8.861	1.503	11.68	18.88	7.058	5.672	3.283	Cish (+800)	1.1203	10.8553	1.50616	0.263195
chr17	32924827	32924891	7.65	2.831	3.999	7.123	6.599	8.909	7.897	2.998	15.9	18.03	6.46	5.171	3.444	Cyp4f14 (-7772), Cyp4f13 (+22543)	1.14392	11.3091	10.1376	0.213869
chr1	97770082	97770193	8.127	3.486	3.749	9.252	3.453	6.058	14.91	3.674	7.884	8.345	4.785	6.407	3.052	Gin1 (-34), Ppip5k2 (+273)	1.04967	11.6801	11.6064	0.373869
chrX	92802562	92802632	15.02	7.976	3.14	18.13	11.31	8.759	4.441	2.636	9.678	2.988	3.147	7.94	4.908	Arx (-483910), Mageb18 (-203025)	0.91634	10.1446	2.51949	0.740605
chr9	20888154	20888250	6.757	2.474	2.65	4.938	5.952	4.875	17.8	4.767	8.61	11.01	10.72	3.39	0	Ppan (+27)	1.14891	11.8984	0.43593	0.0941173
chr11	119184019	119184082	6.972	1.186	2.916	7.709	10.56	2.821	16.82	6.648	8.875	8.982	11.69	8.968	1.457	Cbx4 (-97830), Tbc1d16 (+44448)	0.973774	11.5862	1.4348	0.517669
chr12	110979048	110979136	8.552	1.781	1.463	8.683	1.21	1.111	19.47	4.487	5.82	3.777	7.51	8.934	0	Ankrd9 (-52)	1.01161	10.5835	0.0408369	0.268502
chr1	170885433	170885501	7.409	0.7382	1.593	4.552	6.054	4.247	15.2	6.594	14.59	13.29	5.103	6.668	3.691	Dusp12 (+73)	0.987931	10.8209	2.10193	0.663512
chr8	22593754	22593821	5.851	3.472	2.414	13.49	7.177	5.261	15.41	2.121	11.39	5.686	5.495	6.795	0	Vdac3 (+25)	0.897791	10.5871	1.80506	1.39691
chr7	12834676	12834740	8.807	0.4591	0.9814	8.297	6.876	1.481	15.57	7.381	9.471	7.762	6.978	1.428	5.147	Zfp110 (-53)	0.9473	11.8812	0.672283	0.864448
chr2	104742812	104742893	6.2	3.356	4.711	14.61	11.57	7.533	8.071	1.048	11	11.53	8.997	7.268	3.031	Depdc7 (+25)	1.02639	10.3503	1.70617	0.205611
chr3	72086317	72086391	4	9.017	4.52	17.96	7.434	4.703	8.85	2.369	4.468	9.565	7.462	3.583	3.572	Sis (+881509)	0.892918	11.2315	1.69658	1.25871
chr14	122913080	122913233	8.253	1.36	1.365	10.88	4.198	3.833	12.41	2.448	12.23	8.801	7.751	3.095	2.461	Ggact (+5)	0.988167	11.2507	0.632227	0.820439
chr13	53068059	53068163	8.175	3.579	0.8002	7.932	1.484	5.041	4.985	0.7629	7.729	19.21	5.353	3.041	0.2941	Nfil3 (-87038), Ror2 (+218013)	0.841585	10.4537	1.32165	1.21631
chr6	13069754	13069844	10.67	3.864	0.8025	7.425	2.879	5.167	15.27	3.157	8.896	6.931	3.219	7.842	3.486	Tmem106b (-40)	1.02547	10.9407	0.594978	0.487588
chr2	154892835	154892904	3.925	2.076	0	7.545	3.42	3.391	23.69	0	4.11	4.98	5.314	1.272	3.865	Eif2s2 (+65)	1.05214	11.7336	1.27459	0.213588
chr10	117846055	117846118	1.499	8.707	6.032	10.59	5.295	6.394	18.68	11.33	10.01	9.338	12.77	6.356	2.179	Rap1b (-152)	0.998174	11.5773	3.3576	0.131421
chr2	30967888	30967973	5.279	6.568	2.716	13.45	4.676	4.461	7.901	5.601	10.41	13.47	7.935	3.226	1.522	Tor1a (+2)	0.92188	10.9083	1.92253	0.716038
chr17	74294847	74294910	4.873	1.807	3.539	15.73	4.394	5.524	14.18	4.393	5.531	5.306	2.61	8.648	1.73	Memo1 (+4)	0.9431	12.2543	11.6265	0.916975
chr8	127063944	127064009	4.868	7.761	3.575	13.55	9.364	8.385	13	10.13	5.56	8.591	2.762	9.845	4.827	Pard3 (+84)	0.875329	11.455	2.03904	0.683424
chr14	54253890	54253989	4.405	1.113	0.6344	11.6	2.832	5.221	11.64	2.777	9.822	12.3	2.987	1.441	0.7922	Dad1 (-26)	0.96886	11.1028	0.920175	1.23789
chr10	11149355	11149452	8.911	2.891	1.845	8.865	6.019	4.397	15.16	1.503	15.87	6.989	5.662	6.559	0.1132	Shprh (-26)	0.982287	10.1769	2.48842	1.01156
chr8	25601569	25601691	7.123	2.077	4.814	11.4	6.894	6.75	12.43	2.344	6.788	8.94	7.754	6.999	2.488	Letm2 (-4143), Whsc1l1 (-654)	1.01471	11.7417	11.6743	0.480913
chr6	143778651	143778721	6.432	11.58	3.768	17.39	3.245	13.69	7.949	3.98	11.46	7.977	9.204	5.694	2.846	Sox5 (+430794), Etnk1 (+611456)	0.939946	11.6211	10.7469	0.657641
chr2	73214419	73214517	5.044	2.399	5.303	11.54	3.929	5.38	13.96	1.506	9.377	9.185	3.741	2.817	3.361	Ola1 (-21)	0.962997	11.6545	0.109249	1.09142
chr3	88564178	88564241	7.047	1.224	1.52	4.893	2.845	5.901	16.44	4.569	3.859	11.32	2.203	12.42	3.336	Ssr2 (-15461), Ubqln4 (+10494)	1.15123	11.9382	11.8321	0.302573
chr2	126151970	126152155	6.51	2.747	2.504	9.661	6.043	1.241	8.113	3.69	6.527	15.34	6.769	2.075	1.696	Dtwd1 (-78), Fam227b (-59)	1.0364	11.7216	0.951475	0.561497
chr6	113307161	113307233	6.713	4.387	2.464	9.497	5.323	5.389	16.2	1.486	14.09	7.211	3.143	8.456	2.614	Brpf1 (-27)	1.11003	10.8154	1.34118	0.428206
chr14	54254052	54254154	5.618	1.224	0.3695	7.694	7.411	0.8131	19.26	2.496	10.52	7.031	5.296	6.417	3.337	Dad1 (-189)	1.03571	10.9865	1.67152	0.684647
chr7	82158591	82158662	6.63	11.61	7.608	21.85	10.3	6.592	7.019	10.32	2.305	4.103	9.138	5.64	5.888	Bnc1 (-166328), Sh3gl3 (-16169)	0.893851	12.9242	12.8976	1.6134
chr9	70542676	70542808	10.47	3.154	8.255	7.319	6.318	5.341	15.37	5.759	10.9	6.423	9.396	3.934	3.779	Sltm (-178)	0.99089	12.4585	11.0932	0.326249
chr18	53744689	53744779	10.39	7.183	6.508	7.54	4.377	7.586	13.79	6.376	9.382	7.761	6.354	7.09	2.553	Cep120 (-187)	1.00282	11.5608	10.8551	0.179059
chr1	54557681	54557773	2.55	5.51	4.676	9.08	10.57	2.173	13.01	5.896	1.779	14.84	5.56	5.882	0	Pgap1 (-43)	1.09755	11.1966	2.76187	0.394887
chr18	8694216	8694344	4.92	3.96	0.7606	10.26	5.323	3.355	15.85	1.499	7.42	8.375	8.676	2.343	0	Gm5819 (+203)	1.0464	11.2574	1.57511	0.5839
chr8	112911144	112911214	8.052	10.49	3.499	19.65	5.374	2.624	5.932	9.278	0	5.603	1.724	2.925	0	Mon1b (-724620), Cntnap4 (+341136)	0.809837	13.6382	12.4188	2.43389
chr13	93192399	93192518	3.704	0.6379	1.557	9.588	6.815	5.899	15.54	0.2791	10.01	10.36	4.273	5.331	0	Papd4 (-176)	1.1552	11.3174	0.62514	0.398636
chr1	74505833	74505976	5.241	2.449	2.877	12.9	0.9927	6.411	12.93	7.548	13.57	8.019	3.651	4.334	1.629	Rqcd1 (-153)	0.956748	11.5702	10.9791	0.567548
chr2	26140328	26140449	6.376	2.196	2.128	16.17	4.473	4.835	11.43	8.707	8.023	5.031	2.606	11.42	1.264	Nacc2 (-48212), Lhx3 (+66186)	0.895352	13.7374	11.6807	1.11342
chr10	54075878	54075941	4.748	2.488	3.589	13.12	9.717	7.076	14.5	4.715	6.2	6.61	3.736	1.886	0.4482	Man1a (-114)	0.955171	11.5611	0.833436	0.817726
chr6	71271514	71271596	8.985	2.061	0	13.55	5.8	3.721	8.71	7.516	11.11	7.698	6.992	5.084	2.678	Krcc1 (-464)	0.868785	10.7744	1.77163	0.839125
chr18	61536440	61536512	5.073	2.619	2.661	11.37	3.697	5.636	13.97	1.333	8.509	8.508	4.065	4.215	2.397	Arhgef37 (+60)	1.03369	11.2956	0.765009	0.648657
chr18	5334404	5334544	4.206	2.466	2.58	11.14	8.416	6.77	14.47	9.041	9.886	9.097	3.255	5.328	2.073	Zfp438 (-35)	0.960249	10.984	1.6115	0.534753
chr12	69683763	69683876	6.729	2.687	0.7782	6.682	3.832	6.396	17.37	3.004	10.3	8.082	7.037	5.809	3.79	Sos2 (-1979)	1.11672	11.2854	0.466584	0.243106
chr11	81374447	81374508	19.05	4.376	4.119	5.414	1.92	2.646	8.208	3.448	6.031	6.062	3.215	5.335	0.03857	5530401A14Rik (-486201), Asic2 (-221157)	0.885381	11.1839	0.996714	0.854613
chr5	121618919	121619052	6.7	1.243	4.073	10.35	7.258	2.673	8.573	2.913	9.2	13.11	5.627	3.409	4.269	Acad12 (-48)	1.04266	11.555	0.54831	0.319271
chr10	62449751	62449889	4.027	5.856	0.7623	7.836	7.111	5.591	10.15	2.34	8.174	16.67	6.33	7.446	0	Supv3l1 (-82)	1.08676	10.9563	2.54761	0.292647
chr9	107587745	107587865	6.888	5.204	3.01	16.3	4.954	3.826	8.701	5.612	12.09	6.77	7.67	3.352	0	Ifrd2 (+87)	0.876052	10.1697	1.9677	1.06194
chr10	128498826	128498890	5.461	0.9565	3.484	10.08	4.381	3.055	16.57	2.364	7.445	6.42	6.46	4.914	1.225	Myl6 (-4983), Myl6b (-173)	1.02844	11.6892	0.0891689	0.50036
chr18	69593276	69593367	7.007	2.22	4.538	8.24	10.26	4.329	16.3	6.367	7.017	6.793	7.229	7.976	1.465	Ccdc68 (-332144), Tcf4 (+248812)	1.00425	11.3838	1.37938	0.335408
chr5	61503887	61503959	5.707	12.14	5.147	15.86	4.855	5.965	9.08	6.714	2.161	7.652	5.365	2.311	3.268	G6pd2 (-304920)	0.925752	12.7393	12.0208	0.815742
chr7	138919643	138919811	8.462	4.191	2.411	6.144	2.81	4.593	11.79	5.744	10.39	11.84	6.808	3.221	1.148	Jakmip3 (-69593), Bnip3 (-10221)	1.06835	11.2717	0.179713	0.260229
chr13	16008494	16008594	4.786	0.1959	2.481	6.916	1.597	3.762	9.041	2.731	3.014	17.48	4.768	3.437	0.3765	Inhba (-3307)	1.17194	12.2633	11.5181	0.482783
chr1	133210890	133210953	1.574	0	0.324	6.804	3.098	7.805	17.31	3.807	9.055	12.48	4.119	0.6675	0.1245	Plekha6 (-35175), Ppp1r15b (+79779)	1.14908	11.9235	0.170643	0.121682
chr2	167777454	167777617	4.762	3.012	2.187	8.708	4.137	3.58	6.842	1.766	13.19	17.79	6.285	2.086	0.231	Ptpn1 (-154791), Cebpb (+88621)	1.06729	10.953	1.1435	0.384181
chr18	33463983	33464126	5.593	5.034	3.536	16.17	5.646	6.048	9.168	4.658	9.18	6.922	8.504	9.308	2.326	Nrep (-421), Gm10549 (-108)	0.808615	10.4138	1.7104	1.42506
chr13	59585281	59585378	6.297	3.042	3.772	9.026	2.799	2.367	6.654	2.549	4.528	15.83	5.631	12.18	0	Naa35 (+35)	1.10932	11.5567	0.120141	0.540414
chr13	6849566	6849654	7.442	9.044	3.676	17.63	8.429	6.261	7.415	10.27	2.652	5.093	8.058	2.743	5.455	Pfkp (-200833)	0.94378	13.7115	12.7161	0.857811
chr6	73232225	73232288	8.497	1.224	0.6979	6.085	5.042	3.221	13.96	3.105	3.859	8.952	5.82	4.701	0	Suclg1 (-16125), Dnahc6 (-10626)	1.05947	11.813	0.387097	0.572179
chr7	131410556	131410641	5.316	3.572	1.459	7.908	5.699	4.826	14.82	0.8683	16.26	9.447	6.781	7.313	0	Ikzf5 (-78), Acadsb (-2)	1.17039	11.0151	1.22802	0.499712
chr11	4116822	4116886	3.346	1.798	0.6379	9.43	3.438	4.304	7.638	0	6.432	17.04	0.613	4.457	0	Mtfp1 (-21409), Sec14l2 (+1977)	1.15017	11.7617	0.296538	0.407228
chr7	96951432	96951508	3.066	3.673	2.562	11.59	2.195	2.338	15.36	5.778	7.421	7.323	5.4	0	0	Nars2 (-35)	1.02772	11.4815	1.30305	0.607666
chr18	61211530	61211647	6.069	3.631	2.295	12.08	7.416	5.304	14.96	3.264	7.175	4.214	6.861	4.125	0.1609	Slc26a2 (+23)	0.957952	11.2073	1.2325	0.750223
chr16	44060741	44060862	8.705	1.285	1.168	6.615	3.784	0.7466	7.442	3.538	10.72	14.49	1.658	5.137	0.01296	Gramd1c (-44366), Atp6v1a (+78503)	0.999433	11.2307	0.700486	0.813974
chr4	44979818	44979904	10.8	2.933	1.643	15.84	9.574	7.784	3.67	1.073	21.37	6.905	5.263	2.296	0.1642	Grhpr (-1534)	1.10604	10.0491	1.52976	0.385362
chrX	110085117	110085187	7.714	7.049	7.47	15.65	12.37	8.886	6.051	11.12	2.153	7.79	6.251	6.843	6.252	Pou3f4 (-729238), Gm6377 (+888394)	0.968064	13.5967	13.0804	0.502783
chr18	74268070	74268133	4.073	2.585	4.81	5.859	2.338	2.022	14.58	8.757	9.801	12.69	6.418	6.443	0	Mbd1 (-170)	1.149	12.2564	11.6731	0.119421
chr4	156203080	156203185	6.897	2.216	0.972	6.784	1.605	4.09	15.54	1.142	3.627	7.915	5.963	10.19	2.652	Isg15 (-2315)	1.05146	11.4819	0.049995	0.470055
chr8	14888841	14888944	6.634	1.379	4.695	5.268	2.274	1.481	15.93	1.738	7.207	9.193	4.263	4.154	1.675	Cln8 (+782)	1.09239	11.9829	11.3901	0.374971
chr5	99978925	99979048	6.221	1.692	4.966	9.118	2.669	5.876	15.52	8.566	13.6	6.073	6.416	5.069	1.594	4930524J08Rik (-74), Hnrnpd (-49)	0.946591	11.507	10.4235	0.394892
chr13	60607567	60607631	2.116	0.4591	1.914	11.41	13.47	4.883	3.856	4.815	10.56	19.55	9.312	7.828	0.5637	Dapk1 (+5652), BC051665 (+178765)	1.11401	10.7536	3.23487	0.192431
chr10	80141386	80141464	5.813	3.422	4.187	9.032	6.142	4.899	16.88	2.224	7.563	5.172	8.202	4.266	1.207	Dos (-2060), Atp5d (-32)	1.06521	11.5535	0.573654	0.221455
chr10	77146966	77147030	3.838	3.864	3.288	8.701	3.272	3.98	9.01	2.422	11.8	15.29	3.065	6.114	4.779	Pofut2 (-112302), Col18a1 (-33293)	1.1196	11.1723	0.757772	0.253035
chr7	45395824	45395895	5.921	0	0	4.87	3.524	0.5215	16.89	3.794	12.35	9.153	6.099	2.086	2.64	Snrnp70 (-168)	1.0755	11.3606	0.69732	0.594246
chr5	36989082	36989240	5.919	2.356	3.677	7.918	6.042	3.318	12.92	4.298	12.43	9.999	7.028	4.05	0	Wfs1 (-179)	1.06749	11.1173	0.931073	0.331011
chr8	84648425	84648512	5.592	7.304	1.931	16.45	3.651	3.473	4.637	8.229	2.086	10.07	4.717	5.485	2.218	Ier2 (+14383), Cacna1a (+233105)	0.872968	13.6243	11.8603	1.08242
chr6	54816681	54816813	7.013	2.857	3.271	13.6	7.904	5.24	6.966	4.207	6.532	9.125	8.527	4.543	3.042	Znrf2 (-169)	0.853592	11.5153	1.11415	0.893348
chr4	32561794	32561880	4.87	3.417	1.789	9.126	4.663	3.134	3.504	0.1287	5.804	19.07	2.947	0.3402	1.915	Gja10 (+40923), D130062J21Rik (+318104)	1.17343	11.2884	0.743444	0.596923
chr19	37550750	37550864	7.982	3.63	3.609	9.338	5.417	4.183	4.621	1.198	11.54	14.51	7.041	6.03	6.563	Exoc6 (+389)	1.03078	10.5864	1.31925	0.55452
chr11	60878822	60878886	6.543	0.3444	0.8832	6.192	2.551	5.276	7.638	3.46	10.23	15.93	7.921	4.342	0.07353	Tmem11 (+418)	0.898177	11.732	11.6667	0.757264
chr9	59486698	59486824	5.323	1.438	7.178	11.98	4.225	4.749	8.079	9.108	12.91	10.91	6.538	3.657	2.988	Arih1 (-147)	0.928909	12.5554	10.8152	0.447133
chr7	5015405	5015493	3.453	3.882	5.674	14.57	5.263	1.919	9.263	6.102	11.9	8.892	6.841	5.693	0.713	Zfp865 (-4927), Fiz1 (-752), Zfp524 (-52)	0.915652	10.6884	1.64206	0.649472
chr9	111271574	111271649	8.376	1.665	0.8165	5.785	3.005	2.251	18.05	1.107	9.595	3.959	2.434	8.727	4.434	Epm2aip1 (-233), Mlh1 (-4)	1.09459	11.0531	0.53484	0.609356
chr10	56134287	56134413	5.81	5.451	5.62	17.18	6.929	6.006	7.966	0.9226	6.393	5.202	5.88	3.366	6.891	Msl3l2 (+27433), D630037F22Rik (+94339)	0.861195	10.7773	1.25267	1.29123
chr5	135009090	135009156	10.54	0.9647	4.853	4.317	2.42	5.969	12.37	4.697	7.023	8.885	5.761	7.757	3.945	Abhd11 (-176)	0.991146	12.2889	10.6343	0.637195
chr12	45074453	45074525	5.86	2.007	4.82	5.774	8.725	2.407	14.95	6.227	10.89	9.519	7.251	6.755	5.414	Stxbp6 (-377)	1.06763	10.9472	2.03406	0.224059
chr5	137533195	137533347	5.086	3.665	3.667	9.849	6.257	7.766	15	7.028	12.25	6.168	7.296	9.214	3.607	Gnb2 (+239)	1.05496	10.5054	1.26603	0.275401
chr17	36271857	36271923	6.608	2.078	1.094	5.435	2.662	1.997	12.94	1.286	3.978	10.92	7.224	3.213	1.367	Trim39 (-323)	1.13177	11.8882	0.444011	0.536436
chr12	111516659	111516722	7.272	3.44	6.904	5.119	0.02817	6.23	16.63	8.64	1.981	6.818	7.281	0.02902	6.461	Gm266 (-30868), Eif5 (-21410)	1.09656	13.9024	10.1622	0.518876
chr7	28169679	28169749	0.8547	1.242	4.666	8.992	4.005	5.543	8.373	5.245	9.84	17.61	9.419	8.619	0	Fbl (-34)	1.1655	12.6876	10.5184	0.143301
chr14	61360403	61360504	5.799	1.758	3.498	6.86	4.304	5.704	14.41	7.782	15.65	8.746	7.41	9.576	1.98	Ebpl (-9)	1.1558	10.7971	0.179336	0.25957
chr9	12283365	12283435	6.41	12.42	7.515	15.26	5.07	7.194	5.932	3.822	9.145	8.137	1.94	7.183	3.025	Jrkl (+962341)	0.853289	10.3098	2.45568	0.894897
chr12	99234494	99234558	9.643	2.908	0	4.978	5.323	3.795	7.49	1.499	7.597	13.36	2.075	2.514	0	Foxn3 (+158546), Ttc8 (+313914)	1.1367	11.4748	0.674193	0.263354
chr10	63339009	63339171	4.83	2.32	4.129	13.31	7.153	5.952	9.228	4.146	8.344	7.989	5.197	8.555	3.98	1700120B22Rik (-94942), Sirt1 (+42614)	0.932453	10.7248	1.67421	0.628478
chr15	7129461	7129539	4.319	4.003	3.342	11.95	2.002	1.424	15.2	2.768	8.311	3.879	8.917	6.423	0	Osmr (-254531), Lifr (-24853)	1.00507	13.7557	11.111	0.589165
chr8	13105414	13105484	4.273	3.393	6.685	17.54	6.895	5.459	6.882	1.371	11.02	6.616	2.285	4.336	0	Cul4a (-172), Pcid2 (+10)	0.985968	10.656	1.34956	0.590073
chr17	46455406	46455470	6.297	3.826	1.963	7.771	1.885	1.712	4.078	0.6919	10.99	17.1	6.46	3.542	0.5147	Gm5093 (-15339), Ttbk1 (+32237)	1.0423	10.8472	1.42025	0.695999
chr5	26105943	26106004	19.15	12	1.313	5.902	5.818	2.379	4.318	9.619	2.418	5.786	3.933	1.439	2.61	5031410I06Rik (-612)	0.966652	12.5948	1.66597	0.704599
chr17	10319784	10319912	2.411	2.717	2.134	10.22	4.88	2.615	16.93	5.334	7.369	5.544	7.073	3.085	1.103	Qk (-487), Qk (+381)	1.03422	11.6073	1.24871	0.333409
chr19	8756991	8757138	2.624	1.649	3.803	13.07	6.012	10.05	10.34	3.301	10.6	9.007	3.521	6.604	2.07	Nxf1 (-38)	1.1385	10.7767	3.1748	0.50368
chr17	17624541	17624679	5.51	4.862	0.8875	15.81	2.507	4.239	7.162	4.586	14.08	6.523	4.494	4.412	0.8241	Lnpep (-121)	0.894189	10.2588	1.86139	1.40408
chr5	147077475	147077538	4.648	1.613	5.857	7.976	6.816	4.326	12.77	4.188	11.01	9.604	9.771	8.039	0.5602	Lnx2 (-921), Polr1d (+457)	0.947714	11.6623	0.215859	0.608507
chr4	3835656	3835726	3.823	4.618	1.929	13.69	0.2028	2.75	7.119	4.217	9.122	10.35	4.268	8.828	1.95	Rps20 (-26)	0.864723	10.8582	1.47775	1.61945
chr18	6136325	6136424	5.296	1.793	3.109	9.994	2.545	1.571	9.719	1.379	7.678	9.96	3.109	1.995	0	Arhgap12 (-277)	1.0558	11.5371	0.411581	0.769997
chr1	120100640	120100732	6.092	0.3993	2.799	3.744	2.237	0.5151	9.389	1.484	12.97	15.51	1.837	1.471	0.01705	Tmem37 (-26612), Dbi (+20251)	1.13308	11.2993	1.18769	0.517423
chr3	84214675	84214788	6.339	1.658	3.78	7.518	3.832	4.797	13.42	1.6	7.329	7.387	4.593	7.022	2.256	Mnd1 (-58946), Trim2 (+45080)	1.07994	11.6402	11.2484	0.362795
chr8	85026833	85026905	4.964	0	1.461	7.213	6.704	3.867	12.39	0.3844	10.2	9.908	6.077	6.577	1.471	Asna1 (-1591), 2310036O22Rik (+36)	1.14453	11.4414	0.514596	0.456357
chr11	84179527	84179640	4.208	2.481	3.78	13.74	8.872	5.216	11.59	2.613	6.569	4.809	2.884	7.961	0	Acaca (+6462), Aatf (+333938)	0.881941	10.4005	2.56853	1.65644
chr10	8087188	8087264	2.527	6.702	5.248	10.05	1.868	6.353	15.77	3.884	6.995	5.897	6.432	8.564	0	Tab2 (-130996), Ust (+431599)	1.03763	10.6867	1.82146	0.292373
chr9	44396899	44397004	4.963	1.458	3.29	6.019	3.938	3.343	15.97	0	9.647	7.221	5.216	2.159	0	Slc37a4 (-1224)	1.15504	11.5458	11.3766	0.238251
chr13	51846549	51846669	4.067	2.439	4.763	9.238	2.529	6.665	13.86	3.198	5.254	6.925	6.966	2.24	3.026	Gadd45g (-69)	1.06597	12.7092	10.9071	0.214051
chr8	86501445	86501508	2.949	1.477	3.639	9.004	2.76	1.246	13.58	0.7322	7.743	8.537	7.257	1.045	0.6723	Abcc12 (+79209), Phkb (+660475)	1.0034	12.2409	11.2733	1.07194
chr16	20516908	20517002	6.163	4.455	4.443	8.322	9.892	6.176	13.66	5.339	2.103	5.881	5.425	6.107	2.553	Dvl3 (-27)	1.06632	11.3706	2.16408	0.111864
chr9	53536804	53536889	7.001	4.768	3.085	9.766	4.447	3.589	3.713	4.233	6.616	13.45	9.301	6.948	0	Npat (-200), Atm (-107)	0.817495	11.1128	1.38281	0.731391
chr15	7137743	7137923	5.86	2.986	0.9334	11.73	4.663	5.027	6.361	0.03075	9.499	9.929	3.579	3.22	2.466	Osmr (-262864), Lifr (-16520)	0.978692	10.8779	1.33925	0.723634
chr11	116434045	116434144	6.202	5.256	1.158	14.56	3.352	2.663	5.465	2.777	11.87	7.64	6.111	6.427	0	Ubald2 (+1)	0.859814	10.3337	1.79352	1.59734
chr11	72215068	72215175	3.252	3.604	3.008	7.867	4.527	2.727	14.63	2.069	12.65	7.994	6.783	4.938	1.642	Med31 (+470)	1.16725	10.8751	1.75899	0.198975
chr3	51202070	51202166	3.28	0.9693	1.537	13.63	1.553	0.3085	4.078	3.383	11.21	12.61	1.697	6.704	2.042	Slc7a11 (-758505), Ccrn4l (-22329)	0.911667	11.0188	1.24099	1.39677
chr8	25785230	25785309	5.301	4.138	2.922	7.098	6.155	2.793	13.79	2.522	7.693	7.281	7.926	6.573	1.847	Lsm1 (-321), Bag4 (-61)	1.05426	11.1862	1.84902	0.275267
chr9	63109293	63109396	6.542	3.542	1.021	8.701	4.29	5.378	5.817	4.066	11.34	12.38	3.897	5.379	1.211	Pias1 (-128466), Skor1 (+37635)	0.88144	10.7758	1.44287	0.795519
chr11	60115324	60115387	3.374	3.906	0.3988	8.798	5.098	1.081	12.45	3.983	11.52	8.804	6.706	7.923	3.349	Rai1 (+10343), Srebf1 (+105248)	1.01568	10.8047	2.07859	0.611038
chr14	122534351	122534421	2.249	3.358	4.195	16.43	1.749	6.326	6.39	2.109	9.423	8.19	0.194	6.66	0.8179	Pcca (+47)	0.905197	10.9648	1.00681	1.55532
chr17	73950408	73950474	7.49	2.746	0	5.691	4.571	5.565	6.328	2.684	8.595	13.64	4.344	6.538	0	Xdh (-259)	0.958888	12.0718	0.036106	0.727298
chr16	30063747	30065251	6.982	3.037	2.886	7.525	5.214	4.228	7.815	3.777	6.483	10.67	6.281	4.226	2.929	Hes1 (-841)	1.00529	11.7899	0.318269	0.391198
chr8	76027214	76027324	4.551	8.504	2.541	13.42	1.387	3.07	7.615	2.952	2.652	7.368	2.963	3.324	2.667	Nr3c2 (-872503), 1700007B14Rik (+578575)	0.879294	12.2484	11.5259	1.74089
chr2	23155943	23156035	7.889	3.114	6.195	10.78	6.326	7.518	10.11	5.997	8.086	4.08	7.314	4.352	1.066	Yme1l1 (-380), Mastl (+35)	0.852123	11.4036	11.3267	0.610565
chr19	3834486	3834560	2.17	2.316	4.923	12.74	5.467	3.683	6.83	0.09974	14.24	11.1	1.183	1.927	0	Chka (-17274), Suv420h1 (+67102)	1.06934	10.8632	0.193014	0.2271
chr7	23502353	23502423	3.216	3.481	2.669	22.42	0.7605	7.596	5.61	2.715	9.469	1.521	3.233	2.69	0	Vmn1r167 (+3201), Nlrp5 (+116487)	0.822079	10.0214	1.79746	3.22619
chr8	46327431	46327498	2.702	0.4934	0	8.756	0.4767	2.962	14.98	0.4957	6.289	6.327	4.324	6.549	0.1054	Acsl1 (-143576), Helt (-32794)	1.06832	11.4602	0.631903	0.507982
chr8	122281407	122281494	6.877	0.8022	1.336	4.674	4.304	4.579	13.16	4.687	6.688	8.007	1.613	6.872	0	Zfpm1 (-690)	1.08508	11.7714	0.440062	0.644933
chr18	39489383	39490174	5.227	3.741	3.704	9.889	5.557	4.862	8.142	4.322	7.085	9.307	7.754	4.061	1.915	Nr3c1 (+895)	1.06384	11.6147	1.68736	0.232004
chr10	82860583	82860646	4.673	2.526	4.212	6.681	4.985	5.336	14.52	3.69	7.1	6.67	3.209	2.293	6.698	Gm4799 (-93729), Txnrd1 (+1409)	1.12763	11.698	11.0671	0.135192
chr11	82871253	82871365	3.655	2.864	3.645	15.69	3.406	3.213	5.869	5.371	10.09	7.237	5.335	3.999	0.9454	Rffl (-99)	0.801608	10.5129	1.61746	1.67875
chr5	33657999	33658067	6.159	0	1.085	5.371	5.271	3.92	5.025	3.69	11.42	15.87	9.208	8.953	0.2768	Tacc3 (-95), Tmem129 (-56)	0.940271	11.3883	0.204878	0.452557
chr1	178406246	178406378	5.82	4.434	2.593	14.52	5.861	3.074	8.197	2.097	6.704	3.877	2.309	2.549	0.09507	Efcab2 (+431)	0.871618	10.01	3.1306	1.35699
chr18	56707234	56707866	6.148	3.096	4.139	9.5	6.374	4.982	7.656	3.638	7.575	9.036	5.591	4.386	2.604	Lmnb1 (-263)	1.01858	11.5763	0.585003	0.249714
chr10	127311745	127311819	4.085	3.458	1.485	10.68	6.498	4.963	7.969	5.211	15.68	9.211	5.179	1.828	2.777	Mars (+4)	1.03468	10.0805	1.94821	0.349727
chr10	95680588	95680691	9.339	1.866	2.089	5.57	6.202	2.401	11.37	4.586	11.58	5.657	4.819	4.296	4.447	4732465J04Rik (-111931), Anapc15-ps (-7189)	0.925033	10.3112	2.41914	1.08332
chr2	28840322	28840448	6.372	1.866	1.196	3.659	6.14	3.268	4.445	4.862	6.406	17.31	4.981	6.007	0	Gtf3c4 (-99), Ddx31 (-74)	1.05441	10.4436	1.279	0.526515
chr9	7836527	7837943	6.055	2.259	2.665	5.562	4.785	4.311	9.751	2.735	7.069	10.36	5.709	5.167	3.66	Birc2 (-1980), C330006D17Rik (-171)	1.1793	11.7521	0.253492	0.263919
chr4	141790685	141790826	4.087	2.353	0.3898	12.52	4.694	2.353	6.967	3.402	12.76	8.066	6.41	7.223	1.224	Casp9 (-2856), Dnajc16 (+135)	0.948224	10.2786	1.98188	0.822567
chr12	16826826	16826889	1.674	4.042	8.001	4.769	4.253	3.644	16.87	6.326	1.106	8.27	3.712	2.641	0.8217	Rock2 (-68120), E2f6 (+15893)	1.06785	11.9512	10.7111	0.0589517
chr9	58253082	58253220	6.526	5.235	4.028	3.341	7.612	2.747	13.1	4.386	6.765	8.607	6.801	8.32	1.932	Pml (-3365), Stoml1 (-13)	1.16368	11.016	3.32055	0.227946
chr15	59647946	59648895	5.214	3.383	3.365	7.978	4.488	4.732	9.033	3.507	8.267	9.316	6.081	4.524	2.495	Trib1 (+71)	1.09962	11.234	0.784847	0.320816
chr1	161034561	161034655	7.671	2.813	0.5011	11.56	2.397	5.073	7.283	2.807	12.69	4.987	3.804	3.579	0	Zbtb37 (+227)	0.962684	10.4282	1.27535	0.968428
chr6	121122753	121122887	5.17	0	3.222	9.423	5.019	4.045	4.02	1.666	18.24	12.85	6.598	9.319	2.183	Pex26 (-60847), Mical3 (-41211)	1.16747	10.4709	0.502169	0.23429
chr11	59163209	59163856	5.66	2.138	2.381	6.223	4.525	3.875	10.64	3.368	6.698	8.928	4.254	4.29	2.252	Iba57 (+206)	1.08753	11.6252	0.428907	0.402346
chr10	80264183	80265109	5.685	2.507	3.688	7.218	4.467	5.227	8.893	3.224	7.237	9.543	7.096	5.38	3.468	Gamt (-3634), Dazap1 (-428)	1.08933	11.8147	11.7048	0.287916
chr12	103328590	103328653	4.948	4.45	1.146	10.42	2.873	2.868	10.49	4.54	6.663	5.454	4.598	4.382	2.054	Fam181a (+13663), Asb2 (+27379)	0.923066	12.4759	11.6414	0.632647
chr7	111122213	111122276	4.998	6.394	2.418	6.804	5.042	3.456	12.11	0.1757	4.116	7.263	1.317	4.643	0	Eif4g2 (-39215), Galnt18 (+657732)	0.970282	11.3852	2.85787	0.116178
chr7	111122213	111122276	4.998	6.394	2.418	6.804	5.042	3.456	12.11	0.1757	4.116	7.263	1.317	4.643	0	Eif4g2 (-39215), Galnt18 (+657732)	0.87026	10.7189	3.65283	0.0390759
chr10	80798167	80798807	6.199	1.729	2.029	7.402	3.494	5.723	9.948	2.223	8.802	7.604	5.675	4.408	1.489	Sf3a2(-200)	1.06847	11.3414	0.282091	0.518037
chr13	56548737	56548800	3.224	0.3887	2.318	2.323	2.141	2.892	16.86	8.054	6.38	8.745	6.897	4.15	6.436	Lect2 (-231)	1.00358	13.7267	11.5107	0.00975764
chr14	103099383	103100103	6.317	1.959	4.098	7.47	4.934	3.069	7.475	3.483	5.898	9.812	5.857	5.147	1.672	Fbxl3 (-189)	1.01628	11.862	0.161311	0.403405
chr12	103953134	103953209	0.5458	2.579	3.622	6.752	1.987	1.659	4.967	1.452	13.59	18.65	7.866	3.9	0	Serpina1c (-48285), Serpina1e (+5803)	1.16058	11.2627	10.8721	0.104044
chr6	103067010	103067081	2.905	6.863	3.804	16.6	10.82	7.76	5.782	3.95	1.141	5.576	3.273	7.056	7.092	Cntn3 (-602379), Chl1 (-443830)	0.87655	11.4185	1.55783	1.38434
chr7	5020414	5020519	4.093	1.807	1.017	3.663	6.321	2.765	14.52	0.615	4.769	8.502	6.251	3.535	3.152	Zfp865 (+91)	1.17334	11.2542	2.61019	0.096635
chr9	111134742	111134850	3.353	5.464	2.326	14.03	6.868	2.743	6.108	3.656	7.803	7.055	2.934	2.98	4.546	Lrrfip2 (+16685), Mlh1 (+136812)	0.866534	10.6179	2.40615	1.18514
chr6	118139129	118139219	4.356	1.646	1.971	13.97	6.25	6.467	6.064	4.121	10.07	6.08	2.381	6.785	0	Csgalnact2 (-34)	0.941674	10.5548	1.85323	0.687165
chr14	56620584	56620667	6.639	2.788	0.5108	6.553	1.497	0.9457	5.318	1.778	10.58	11.66	3.599	6.917	0	Mphosph8 (-47622), Parp4 (+45007)	0.990523	10.6306	1.49265	0.95763
chr12	108792142	108793387	4.967	3.107	3.457	8.124	5.172	3.727	8.338	3.16	5.657	8.73	5.325	3.391	1.978	Yy1 (-208)	1.07092	11.599	0.659078	0.383728
chr8	14146997	14147067	4.048	5.667	3.118	19.17	6.236	4.951	2.305	0.8962	8.266	4.322	0.3018	2.769	0.986	Dlgap2 (+51167), C030037F17Rik (+600395)	0.831118	10.0442	2.32809	1.89132
chr6	4286333	4286482	3.804	9.631	7.862	13.82	5.812	6.083	6.139	1.659	3.089	5.953	7.645	3.46	3.743	Col1a2 (-219085), Bet1 (-199436)	0.943806	10.9335	1.59074	0.639512
chr15	58415376	58415468	6.674	1.624	2.697	8.024	2.006	3.703	11.04	2.968	9.301	3.897	4.789	7.472	0	D15Ertd621e (-46)	0.985477	11.1267	0.353049	0.672206
chr18	20058637	20059321	6.205	2.531	2.114	5.705	3.214	3.835	8.248	3.893	7.663	9.308	4.295	3.777	3.086	Dsc2 (+575)	1.0135	10.9494	1.65153	0.436215
chr9	28142385	28142455	1.462	10.14	5.271	20.35	8.112	3.068	6.865	7.249	1.273	0.667	6.143	3.134	0	Opcml (+351473)	0.902056	13.6413	12.9116	1.72629
chr6	39118204	39118294	4.058	3.728	1.186	8.49	5.954	6.122	11.57	4.633	6.411	5.188	6.27	8.573	0	Parp12 (+100)	0.97147	10.764	1.59762	0.474999
chr13	54687549	54688336	5.321	2.94	3.567	9.006	4.557	4.605	6.822	3.657	5.332	8.037	3.932	3.443	4.72	Rnf44 (+151)	1.05703	11.8531	0.501848	0.288508
chr11	19919892	19920748	5.308	3.893	2.311	7.102	3.988	5.519	8.524	3.113	6.672	8.225	4.333	4.391	3.016	Spred2 (-4122)	1.07209	10.8826	1.89858	0.477669
chr5	129501025	129501139	2.348	1.235	4.325	5.328	3.533	2.91	13.28	5.859	5.843	7.83	5.651	2.069	3.715	Sfswap (-149)	1.08945	12.7622	10.5396	0.121621
chr11	61854765	61855345	6.474	3.99	3.844	7.134	5.155	6.154	6.812	4.088	7.517	8.291	6.438	3.357	1.623	Ulk2 (+18)	0.953454	11.3508	11.3096	0.260136
chr5	72559278	72560067	4.879	1.812	3.401	8.343	4.208	3.095	8.09	2.533	6.002	7.082	4.674	3.27	2.155	Nfxl1 (+11)	0.982392	11.74	0.161782	0.722608
chr7	35118860	35119603	5.997	3.596	5.366	8.26	5.183	7.194	6.975	5.23	9.434	7.003	6.22	3.713	1.993	Cebpa (-61)	1.02934	10.5301	0.806216	0.389027
chr15	88861363	88862883	5.945	2.578	3.016	7.475	5.102	4.375	6.908	3.617	9.12	7.851	4.646	6.15	2.668	Pim3 (-63)	1.0474	10.7531	0.928278	0.203483
chr5	72913649	72914830	5.832	3.155	2.861	6.111	5.215	4.278	7.928	3.142	7.745	8.292	5.407	4.386	2.889	Slain2 (-385)	1.14061	10.8263	1.81279	0.282528
chrY	40630256	40630334	5.006	7.001	7.328	17.23	3.458	4.633	2.951	1.372	9.89	2.921	2.437	0	5.872	Gm20793 (-51751)	0.921826	10.1104	1.77363	1.17938
chr17	64331573	64332521	4.912	3.007	3.238	7.31	4.599	4.379	8.263	2.702	7.004	7.551	4.703	5.067	2.41	Pja2 (-131)	1.08803	11.3486	0.609784	0.342788
chr11	86757089	86758564	5.546	2.881	4.82	5.308	4.794	3.54	8.74	4.263	7.033	8.406	4.876	4.253	3.567	Cltc (-262)	1.13599	11.7776	11.547	0.164851
chr2	156179602	156180729	4.708	2.816	3.108	7.145	4.683	3.552	7.569	2.782	7.537	8.489	6.365	4.834	1.397	Rbm39 (+72)	1.06254	11.3831	0.857756	0.332226
chr5	89277914	89278006	5.271	2.183	3.038	7.686	4.59	3.091	11.79	2.768	8.174	3.004	3.936	9.976	5.337	Gc (+179938), Slc4a4 (+390661)	1.04551	10.6146	1.34719	0.370627
chr17	29489850	29490990	4.364	3.007	3.375	7.873	4.701	4.17	7.473	3.949	6.668	7.929	6.181	3.945	3.123	Pim1 (-392)	1.00064	11.3186	0.79343	0.458386
chr19	6362927	6364120	5.956	2.579	1.399	5.38	3.451	4.269	9.019	3.403	6.38	7.127	3.751	3.218	1.821	Sf1 (-166)	1.06587	11.5408	0.441206	0.501056
chr14	120477386	120478409	4.877	2.598	3.302	6.991	3.899	4.628	7.344	3.086	6.432	8.235	4.783	3.764	2.261	Rap2a (-563)	1.08689	11.314	0.697896	0.385367
chr1	139117133	139117226	4.605	6.425	3.495	15.33	2.385	9.778	5.754	0.9523	5.193	1.727	1.411	3.362	1.139	Dennd1b (+153471), Crb1 (+259861)	0.823989	10.7763	0.315381	2.25505
chr16	10745701	10745779	2.947	7.079	0.3825	4.549	3.321	5.544	15.32	6.458	6.732	4.477	3.946	4.571	3.63	Socs1 (+39796), Clec16a (+200401)	1.01016	10.4586	2.98692	0.332838
chr3	65958085	65958874	4.358	4.011	2.504	6.134	3.857	3.696	7.546	4.312	4.844	9.196	5.039	3.601	2.886	Ccnl1 (-231)	1.08638	11.4952	1.16634	0.282545
chr1	164248135	164249309	4.711	3.09	3.749	7.554	3.596	4.61	6.665	3.489	6.778	8.294	5.742	3.552	3.24	Slc19a2 (-324)	0.990209	11.7495	11.3757	0.277806
chrY	28752577	28752743	3.775	5.48	1.504	11.77	6.745	3.372	5.704	3.657	1.875	5.861	2.527	4.791	3.459	Gm20810 (+19162)	0.815364	11.6973	1.36215	1.71035
chr4	45531234	45531358	2.031	1.995	0.5572	4.909	6.84	3.822	14.98	1.012	6.457	4.94	3.894	4.217	0.5313	Shb (-966)	1.1576	10.6331	2.84632	0.147223
chr12	101083146	101084121	7.237	2.89	3.491	7.523	5.742	4.106	5.991	4.716	5.979	6.032	4.534	4.538	2.717	Smek1 (+68)	0.936445	11.091	1.88417	0.219525
chr9	121857498	121858041	6.239	3.193	3.221	5.178	3.575	2.359	7.634	2.365	6.334	7.632	3.579	4.717	3.133	Higd1a (+230)	1.12492	11.6304	0.529809	0.395784
chr9	118040175	118041186	5.798	3.329	2.174	6.022	3.705	4.304	6.5	3.03	4.792	8.303	5.094	4.145	3.627	Azi2 (+182)	0.968927	11.6572	0.58855	0.460974
chr6	39206499	39207051	4.543	2.56	3.971	7.505	4.484	4.092	7.751	3.409	6.18	6.787	5.587	5.21	2.312	Jhdm1d (+14)	0.961052	11.673	0.171457	0.531801
chr9	77750402	77751179	4.987	2.167	3.908	6.367	6.908	3.343	7.122	4.388	6.216	7.98	4.579	3.852	2.719	Gclc (-3744)	0.995861	11.6848	1.56128	0.38779
chr14	54876576	54876693	3.875	6.425	7.354	13.27	4.186	1.392	5.537	1.687	5.07	3.735	1.625	2.188	1.247	Ppp1r3e (+915)	0.88332	10.747	1.66754	1.05797
chr5	113771414	113771921	4.63	3.021	4.029	8.414	4.581	3.564	8.668	3.421	4.36	4.696	3.488	3.451	1.312	Iscu (-1080), Sart3 (-19)	0.863671	11.3509	1.04184	0.976161
chr1	156035531	156036658	6.436	1.995	2.483	6.45	3.966	3.816	6.053	4.764	6.988	7.258	5.777	3.988	4.694	Tor1aip1 (+385), Tor1aip2 (+692)	0.86898	11.9634	11.9128	0.592194
chr3	97609353	97610634	4.863	3.048	2.878	7.056	3.742	4.264	6.612	3.566	7.084	7.581	5.349	4.342	1.706	Chd1l (+209)	0.969284	11.4255	0.107145	0.29871
chr7	100606869	100607821	6.458	3.067	2.844	6.335	3.691	4.812	6.764	4.227	6.015	6.511	5.534	2.612	1.611	Rab6a (-241)	0.912667	11.2727	0.59611	0.570876
chr15	27630471	27631552	4.659	1.916	2.527	5.628	3.877	3.705	7.164	3.166	6.466	8.332	3.41	4.223	2.8	Fam105b (-319)	1.119	11.1483	0.787092	0.306003
chr11	51262929	51263479	3.323	2.651	3.078	8.752	3.352	2.553	7.442	2.62	6.719	6.251	3.591	3.454	1.573	BC049762 (-253), Clk4 (+90)	0.933592	11.5585	0.46085	0.945638
chr6	54594186	54595652	5.453	3.114	3.218	6.776	3.953	3.039	7.141	3.212	5.362	6.39	4.057	3.677	1.681	Fkbp14 (-1742), Plekha8 (-192)	1.00277	11.607	0.550538	0.471423
chr7	27195516	27196686	3.773	1.76	2.206	5.103	1.963	3.375	7.707	2.438	5.131	9.162	5.099	3.094	0.8969	Snrpa (+170), BC024978 (+320)	1.13589	11.8871	11.8336	0.293679
chr1	119191320	119191390	5.848	0.5247	3.813	1.48	0	2.116	12.54	2.372	4.167	5.869	3.88	3.657	5.042	Gli2 (-137736), Inhbb (+230893)	1.02164	13.6031	10.6374	0.106354
chr7	6155811	6156956	5.214	3.014	2.981	6.637	4.181	3.926	6.149	2.975	5.516	7.69	4.11	2.683	2.317	Zfp787 (-413)	1.02444	11.8274	0.0599602	0.267405
chr4	132075161	132075876	6.113	3.343	3.626	5.912	4.42	2.977	5.368	4.384	8.437	8.183	4.123	4.828	1.323	Epb4.1 (-3422), Gm10300 (+822)	0.989967	10.6944	1.01305	0.323868
chr11	84870381	84871320	4.239	2.432	3.239	5.329	3.379	3.18	7.235	3.944	5.406	8.665	3.758	3.949	1.554	Ggnbp2 (-62)	1.11709	11.8148	11.6911	0.23477
chr10	19933664	19934678	5.326	3.193	3.187	5.906	3.636	5.217	6.33	4.127	5.038	7.894	4.384	5.276	2.481	Map3k5 (-301)	1.13107	12.0722	11.8107	0.131272
chr1	89454407	89455043	4.651	3.662	2.812	6.51	4.386	5.654	8.492	4.784	5.392	5.802	4.987	4.01	3.612	Agap1 (-86)	0.996534	11.5347	0.847342	0.251273
chr9	101034247	101034978	4.454	2.373	2.118	6.027	3.998	3.315	7.83	2.701	5.312	7.089	3.344	4.347	0.9774	Pccb (+285)	1.04392	11.4901	0.795481	0.49763
chr11	71018701	71019892	5.594	2.355	2.166	4.73	3.184	3.859	6.568	3.311	6.524	8.434	4.552	3.93	1.65	Mis12 (-314), Derl2 (+6)	1.16415	11.0925	1.20343	0.18488
chr3	95217482	95218094	4.857	3.305	3.464	5.189	5.08	2.56	7.89	2.87	6.059	7.385	5.315	4.439	3.304	Gabpb2 (+128)	1.10321	11.3635	1.3856	0.241191
chr10	11280644	11281332	3.886	3.072	3.163	6.991	3.92	2.411	6.395	3.765	6.224	7.98	4.614	2.934	3.805	Fbxo30 (-342)	1.02261	11.639	0.938547	0.305342
chr2	103797290	103797983	4.566	3.254	3.609	6.632	3.575	4.691	7.617	2.982	8.206	6.395	3.843	5.934	2.841	Caprin1 (+12)	1.14025	11.0056	0.59415	0.211679
chr8	71542665	71543218	5.184	2.046	1.272	6.386	2.817	2.56	7.868	2.039	5.539	5.748	4.011	2.582	1.018	Mvb12a (+12)	0.972841	11.3846	0.86393	0.794591
chr3	88579039	88580119	5.19	2.35	3.107	6.248	3.449	3.896	7.336	3.28	5.605	6.412	3.488	3.828	3.501	Ssr2 (-92)	0.989911	11.522	0.308066	0.458558
chr12	40222057	40222955	7.051	2.428	3.268	6.351	3.207	2.944	5.474	3.084	5.71	6.268	6.318	3.73	1.406	Gm7008 (-252), Ifrd1 (+683)	0.861895	11.7549	0.0999481	0.744362
chr7	16923844	16924583	3.788	3.047	3.208	6.836	3.592	3.006	7.48	4.025	5.759	7.015	4.653	4.567	3.033	Calm3 (-100)	1.00413	11.6918	0.39419	0.453033
chr6	117168103	117169103	5.669	1.441	4.152	6.08	3.086	5.04	6.355	4.14	5.82	7.003	4.427	4.041	2.417	Cxcl12 (+26)	0.907646	11.7928	10.9666	0.607359
chr14	57664716	57665512	4.869	3.104	3.847	7.666	3.669	2.162	6.886	2.842	4.353	5.603	3.905	3.468	2.459	Xpo4 (+316)	0.888536	11.9515	0.00924081	1.08471
chr3	157533710	157534745	5.97	2.668	2.177	5.575	3.669	2.747	6.884	2.46	7.297	6.523	4.228	3.427	4.509	Zranb2 (-169)	0.973773	10.8177	1.52747	0.650062
chr6	90462887	90464105	5.462	3.332	3.653	5.433	4.997	3.598	6.275	4.486	7.458	7.656	5.641	4.617	2.842	Klf15 (-1808)	1.05056	10.7114	1.87967	0.272609
chr10	86778164	86779067	4.204	2.19	3.86	5.374	3.358	3.946	7.438	3.987	6.854	7.733	4.896	4.758	3.03	Nt5dc3 (-389)	1.07928	11.9156	11.004	0.233678
chr1	86525043	86526081	4.767	2.195	2.556	5.944	4.199	4.569	8.485	3.784	7.198	5.545	4.576	2.885	2.029	Ptma (-1174)	0.982143	11.3338	0.615064	0.466175
chr1	129924527	129924642	5.695	4.131	2.034	4.662	3.024	5.486	11.43	5.744	2.001	2.923	3.123	0.9221	1.773	Daf2 (+498424), Thsd7b (+651241)	1.17506	12.6389	0.0942662	0.169748
chr7	29907747	29908825	5.185	2.682	1.818	4.294	3.315	2.757	7.18	3.141	4.829	8.033	3.106	4.188	2.961	Zfp27 (-1714)	1.10725	10.8643	2.60937	0.186985
chr3	95818986	95820134	5.329	2.231	2.522	4.264	4.17	3.166	7.805	2.896	5.636	7.187	4.821	3.873	1.278	Rprd2 (-607)	1.12433	11.7662	0.310656	0.298786
chr9	79793002	79793967	4.7	2.664	2.904	5.464	3.19	3.329	7.836	3.736	4.402	6.535	4.071	2.961	2.194	Tmem30a (-55)	1.06521	11.9607	11.893	0.285768
chr2	27009542	27010460	4.757	2.273	3.472	5.891	2.969	2.865	6.772	2.42	4.587	7.108	5.634	4.139	2.52	Cacfd1 (+75)	1.04142	12.0436	11.668	0.382369
chr14	20707156	20707785	4.5	1.886	1.847	6.37	4.071	5.448	7.907	1.493	8.168	5.653	5.999	3.758	2.01	Zswim8 (-81)	1.14184	10.9982	0.719923	0.307952
chr13	31557868	31558871	4.861	3.671	3.911	7.703	3.828	3.12	5.232	3.609	6.29	6.597	5.635	3.693	2.932	Foxq1 (+200), A530084C06Rik (+963)	0.89193	11.306	0.903312	0.532051
chr18	24652866	24654291	5.541	1.834	3.01	5.229	3.269	4.366	7.429	3.029	3.949	5.975	3.693	3.082	1.73	Mocos (-112)	1.04114	12.2632	11.4381	0.33555
chr4	123904533	123905298	4.266	1.938	3.233	5.304	2.046	2.947	6.581	2.549	5.735	8	4.556	2.925	4.039	Mycbp (+84)	1.08114	11.8779	11.0164	0.406905
chr16	11253823	11254780	4.585	2.547	2.67	5.325	3.11	3.392	8.619	1.93	5.443	5.556	4.169	4.375	1.91	Gspt1 (-93)	1.09018	11.5037	0.293156	0.27473
chr16	33379772	33381052	4.903	3.765	4.235	6.194	5.481	4.51	7.078	2.73	4.895	5.874	6.478	3.805	3.333	Zfp148 (-363)	1.10074	12.3896	3.61213	0.20304
chr7	128237826	128238720	5.058	2.684	2.529	6.444	5.367	4.118	7.283	3.055	6.367	5.26	6.022	3.935	3.285	9130023H24Rik (-242), Armc5 (+916)	0.877697	11.4784	0.91758	0.713858
chr15	80254035	80256248	4.806	2.558	3.27	5.036	4.696	3.636	6.371	2.957	4.909	7.786	5.323	4.09	4.154	Atf4 (-42)	1.16107	11.9204	0.475475	0.17326
chr17	74527521	74528420	4.394	2.506	3.402	6.308	4.633	2.867	6.892	5.31	7.065	6.35	4.476	3.333	2.041	Birc6 (-324)	0.94504	11.9434	0.262865	0.310711
chr4	94602922	94603520	4.075	2.121	2.363	5.908	1.964	3.378	6.67	1.962	3.485	7.283	4.612	3.565	2.201	Plaa (+23)	1.04319	11.3996	0.507607	0.404049
chr15	79546488	79547508	4.881	2.946	3.257	5.902	3.323	4.89	7.305	2.956	6.677	5.841	3.346	4.065	2.468	Ddx17 (-257)	1.08399	11.3203	0.231762	0.291405
chr11	52360283	52361300	5.415	2.801	2.79	5.402	3.624	3.006	6.866	2.088	6.239	6.24	4.759	3.736	2.485	Vdac1 (-68)	1.02426	11.2063	0.940561	0.434604
chr5	31179380	31180490	4.978	2.603	2.094	6.16	4.284	2.815	6.873	3.358	4.979	5.889	3.684	3.377	1.978	Gtf3c2 (+209)	0.80064	11.0723	1.83813	1.62806
chr14	20082088	20083357	4.886	1.937	2.816	5.447	3.612	2.821	8.506	3.538	4.903	5.03	4.723	3.469	3.09	Saysd1 (+449)	1.01215	11.9118	11.9009	0.375331
chr15	81871682	81872684	4.324	2.129	4.118	5.302	3.91	3.884	7.396	2.206	6.512	6.825	4.906	2.752	0.5871	Phf5a (-272), Aco2 (-126)	1.15486	12.0457	11.0879	0.221515
chr11	49243284	49244220	5.668	2.75	2.443	5.139	1.896	4.044	6.974	3.048	4.585	6.045	4.601	4.516	2.554	Mgat1 (-439)	0.976542	11.9033	11.6424	0.473506
chr2	126875771	126877034	4.335	2.624	3.341	5.992	4.908	3.625	6.469	3.386	6.526	6.979	4.062	3.081	1.682	Trpm7 (-173)	1.1567	11.3926	0.412269	0.190657
chr9	55511466	55512632	5.941	2.871	3.674	6.391	3.053	3.625	5.617	2.918	5.857	5.776	3.566	3.519	2.708	Etfa (+194)	0.954107	11.4158	0.0346003	0.474135
chr19	3323730	3327291	5.192	3.33	4.474	5.024	4.312	3.895	6.458	4.218	6.099	7.007	3.971	5.218	3.832	Mtl5 (-63346), Cpt1a (+2210)	1.11886	11.5383	0.155819	0.143106
chr11	120630025	120631112	4.355	2.111	3.145	4.424	3.165	4.259	7.263	2.709	6.869	7.571	4.642	5.053	4.737	Sirt7 (-5555), Mafg (+3031)	1.16897	11.9164	11.1311	0.207576
chr5	104046062	104047368	4.328	2.012	3.554	6.029	3.677	3.946	7.133	2.283	5.339	6.066	4.168	5.101	4.149	Nudt9 (-154)	1.03554	11.6472	11.5275	0.366793
chr18	74777883	74779307	4.826	3.257	2.496	5.279	4.222	4.695	5.981	3.137	6.463	7.446	4.472	2.655	2.559	Acaa2 (-602)	1.04805	11.167	0.374427	0.196761
chr19	3767584	3770146	4.558	3.504	4.164	5.614	4.922	4.702	6.939	3.912	3.945	6.362	4.923	4.206	3.089	Chka (-82932), Suv420h1 (+1444)	1.10934	12.1883	12.0406	0.0851129
chr17	25832835	25834230	5.632	2.708	2.679	4.452	3.116	3.663	6.285	2.989	5.792	7.089	4.694	4.201	2.749	Stub1 (-172)	1.19686	11.4599	0.427483	0.135101
chr1	55052296	55053812	4.241	3.3	2.977	6.486	3.891	4.246	5.236	2.829	6.224	7.463	3.702	3.961	4.796	Coq10b (+284)	1.0238	11.2895	0.786827	0.247048
chr8	33731571	33732288	5.575	3.159	3.34	7.361	5.259	3.547	5.135	3.796	4.853	5.353	3.781	4.437	4.056	Gtf2e2 (-409), 1700104B16Rik (-116)	0.894666	11.1471	1.47302	0.429808
chr17	31635082	31637248	6.235	2.576	2.689	4.618	3.421	3.74	6.339	2.881	5.203	6.185	4.552	3.093	3.651	Cbs (+1034), Pknox1 (+71364)	1.13146	11.7391	0.111718	0.191162
chr9	8003149	8004074	4.74	1.874	2.022	4.893	2.421	3.241	6.217	2.214	5.055	7.523	2.669	3.321	2.378	Yap1 (+984)	1.11752	11.3582	0.631891	0.324764
chr17	46727553	46729548	4.172	2.57	3.297	5.263	4.624	3.761	6.474	2.697	5.291	7.422	4.902	4.565	3.421	Gnmt (+617)	1.15061	11.6882	0.477725	0.144976
chr6	34175616	34177176	4.681	1.601	3.467	4.385	1.722	2.387	8.267	2.157	3.84	5.966	3.302	2.222	3.076	Slc35b4 (+715)	1.06955	12.3118	11.1867	0.386995
chr1	30949570	30950884	5.356	2.182	2.172	5.827	3.174	2.552	5.831	2.893	6.419	6.276	5.39	4.202	2.808	Ptp4a1 (-457)	0.911675	11.3274	0.799356	0.67488
chr1	4807736	4808575	5.018	2.437	3.346	5.364	2.771	3.534	6.594	2.329	4.729	6.226	4.595	3.197	2.389	Lypla1 (+333)	1.05699	11.9672	11.5069	0.365839
chr11	114850893	114852011	5.037	2.256	2.456	5.271	2.652	3.764	5.88	3.623	5.037	6.987	2.942	3.482	1.818	Gprc5c (-390)	0.957508	11.5417	0.237593	0.506843
chr13	101768117	101769387	5.21	2.551	2.413	6.104	3.693	3.108	6.413	4.417	5.575	5.436	4.858	4.51	1.593	Pik3r1 (-535)	0.913025	11.7553	0.488943	0.517398
chr11	48799438	48800767	5.648	2.539	2.781	5.328	3.61	3.208	6.888	2.595	5.529	5.196	3.397	3.796	2.61	Gnb2l1 (-257)	0.9705	11.2727	0.851647	0.523306
chr7	114254290	114255316	4.275	2.122	2.718	4.925	4.3	4.287	7.815	3.244	5.254	6.01	4.303	4.127	2.669	Copb1 (-123)	1.10169	11.697	11.6705	0.230279
chr5	21701308	21702174	3.967	3.093	2.288	4.851	3.565	3.075	6.727	4.317	5.745	7.466	4.823	3.838	1.147	Napepld (-347)	1.05265	11.4578	1.05955	0.276553
chr19	12795629	12796515	4.494	1.697	2.12	5.182	2.526	2.755	7.717	1.91	3.474	5.588	3.121	3.56	1.564	Lpxn (-2534), Zfp91 (+54)	1.05396	11.8082	11.802	0.420937
chr1	60566487	60567811	5.326	3.345	3.325	5.993	4.388	5.131	5.036	3.466	5.829	6.625	4.536	4.601	3.196	Raph1 (-384)	0.969112	11.4178	0.185436	0.229137
chr11	16507387	16508815	6.057	2.118	3.209	4.782	3.145	2.675	6.085	3.133	3.885	6.02	3.913	2.718	2.687	Sec61g (+383)	0.979232	12.001	0.128332	0.480514
chr5	146794650	146795406	4.969	2.546	4.657	5.835	4.554	3.53	6.843	5.164	4.206	5.286	5.492	3.821	3.067	Usp12 (-22)	0.975317	13.3036	11.5103	0.284045
chr17	34981267	34982440	3.918	2.501	3.431	4.983	4.331	4.355	6.952	3.292	3.918	7.035	5.333	3.147	2.284	Lsm2 (-275)	1.16012	12.4353	12.0639	0.0869336
chr1	75435488	75436413	4.139	2.298	2.108	4.307	2.523	2.458	7.068	1.536	3.837	7.298	3.597	2.008	3.164	Gmppa (+8)	1.1562	11.8149	0.232779	0.297761
chr10	79853249	79854872	4.392	2.232	3.289	4.822	3.723	2.876	6.171	2.54	4.51	7.399	4.54	3.632	2.463	Ptbp1 (-366)	1.11943	11.9805	0.129139	0.265418
chr3	16182480	16183502	4.899	2.854	2.471	5.079	3.858	3.246	5.22	3.178	4.256	7.572	4.169	3.381	1.722	Ythdf3 (-192)	1.0139	11.6924	0.597819	0.34752
chr15	38300242	38301685	3.951	2.718	3.892	5.695	4.895	3.296	5.355	3.293	6.497	7.725	5.002	4.162	2.75	Klf10 (-257)	1.09247	10.7698	10.2918	0.0487547
chr19	38124681	38125969	5.167	3.416	1.753	4.972	2.844	4.156	5.174	2.414	6.463	7.363	3.931	2.52	1.821	Rbp4 (-4)	0.924604	10.754	1.26216	0.599617
chr4	62524827	62525508	5.766	1.451	3.346	5.338	3.627	3.097	6.643	3.029	7.221	4.909	3.299	3.82	1.533	4933430I17Rik (-201), Pole3 (-100)	1.00269	11.0402	0.498315	0.465856
chr2	126675017	126676504	4.639	2.372	3.033	6.214	4.444	3.456	6.158	4.209	4.267	5.638	4.04	3.264	3.539	Gabpb1 (-217)	0.847571	11.7948	0.927095	0.901101
chr1	170589509	170590475	4.259	4.36	2.88	5.339	4.19	4.5	5.703	3.591	5.001	7.319	4.453	4.698	3.555	Nos1ap (-131)	0.970292	11.22	1.76635	0.286665
chr18	3337055	3337999	4.458	1.55	1.71	7.655	2.524	3.646	4.669	2.349	5.724	5.826	5.429	4.007	1.138	Crem (+152)	0.870775	10.9388	0.996392	0.939337
chr11	87591402	87592360	5.009	3.167	3.081	4.353	3.571	4.097	7.939	4.268	6.236	5.259	4.819	3.302	3.296	Mtmr4 (-281)	1.09344	11.686	11.4364	0.201485
chr17	70852070	70853712	5.026	1.933	2.412	4.221	3.525	2.944	7.101	2.562	4.169	6.183	3.854	3.432	2.906	Tgif1 (-1157)	1.08689	11.8439	0.101042	0.328568
chr9	108648326	108649682	6.578	2.77	4.111	4.647	3.601	3.541	5.829	3.35	3.643	5.47	4.308	4.239	3.959	Gm10621 (+164), Arih2 (+376)	0.99042	12.17	11.8205	0.282439
chr3	89391390	89392375	4.843	1.628	4.376	4.727	3.099	3.842	7.546	1.911	5.504	5.385	3.891	3.74	2.198	Zbtb7b (-4212)	1.05951	12.116	10.594	0.323825
chr9	46224000	46225674	5.005	2.393	2.707	4.787	3.761	2.817	5.806	2.76	5.608	6.863	4.007	2.787	4.474	Apoa1 (-3743)	1.05287	11.1618	1.15438	0.36701
chr4	119538667	119539943	4.629	2.085	2.198	5.216	1.979	3.06	7.777	2.351	4.999	4.784	3.23	4.236	3.054	Foxj3 (-356)	1.03711	11.5467	0.127308	0.426888
chr3	129830085	129831468	5.194	2.7	3.237	5.604	2.451	3.117	5.122	3.725	3.336	6.436	4.994	3.659	2.525	Gar1 (+619)	0.97772	12.6432	11.5859	0.467051
chr10	128035407	128036780	4.861	2.972	3.01	5.645	4.112	5.378	6.288	2.987	5.851	5.524	5.974	3.927	3.319	Naca (+748)	1.09393	11.2019	1.50753	0.188573
chr6	145864988	145867136	4.053	3.075	3.502	4.052	2.721	3.093	5.954	3.725	4.88	8.223	3.669	3.52	2.458	Bhlhe41 (-504)	1.19976	12.1141	11.6339	0.102503
chr6	58592774	58593501	6.783	4.702	3.793	5.232	4.75	3.333	5.358	5.058	4.002	4.86	4.871	5.955	3.256	Abcg2 (-3533)	0.982639	12.3222	1.45475	0.168413
chr17	86753060	86754810	4.777	3.26	3.454	4.995	3.914	4.011	6.082	3.384	5.899	6.36	4.044	3.918	2.958	Epas1 (+28)	1.12145	10.9532	1.24749	0.177064
chr2	104492803	104494121	4.611	2.48	2.754	6.502	3.88	3.924	5.327	2.912	5.763	5.756	5.301	3.167	3.485	Hipk3 (+984)	1.06289	11.3251	2.29462	0.180987
chr11	62549799	62551824	4.566	2.123	2.221	4.275	4.033	2.542	6.913	2.129	4.259	6.329	3.847	2.635	2.196	Ubb (-359)	1.13454	11.6608	0.607218	0.290172
chr12	91589470	91591525	4.589	2.776	3.377	5.382	4.335	3.885	6.668	2.95	5.237	5.444	3.825	3.79	2.687	Gtf2a1 (-489)	1.04629	11.5844	0.388331	0.305246
chr9	31030038	31031502	4.22	2.665	2.415	6.456	4.073	4.085	6.206	3.221	5.03	5.199	4.186	3.482	2.538	Zbtb44 (+126)	0.931735	11.319	0.810974	0.612055
chr6	72413347	72414901	4.543	3.092	4.136	5.892	2.645	4.15	5.659	2.846	3.729	5.979	4.299	3.551	2.347	Ggcx (-184)	0.946121	12.5286	11.0389	0.540209
chr4	99715187	99715700	3.898	1.382	3.284	6.579	2.407	2.751	6.034	2.374	5.241	5.555	3.4	4.808	2.01	Alg6 (-221)	0.844531	11.47	0.392175	1.74424
chr11	106786822	106788358	4.821	3.681	4.199	5.212	4.951	3.438	6.544	3.561	5.113	5.469	5.196	4.257	5.042	Cep95 (-1685), Ddx5 (+942)	1.01564	11.5553	0.993239	0.215346
chr2	128967588	128969078	5.587	1.939	2.879	4.763	3.416	3.342	5.779	3.69	3.548	5.893	3.074	3.271	2.024	Gm10762 (-608), Zc3h6 (+931)	1.04606	11.8331	0.325398	0.276537
chr1	191575466	191576356	4.32	2.501	1.99	4.878	3.661	3.877	7.036	4.08	7.543	5.77	5.486	3.336	1.257	Dtl (-377), Ints7 (+148)	0.909578	10.7824	1.44175	0.527554
chr18	84850496	84851575	4.456	2.715	2.379	5.917	2.028	4.096	6.213	2.368	5.066	5.416	3.261	3.785	3.653	Cyb5 (-302)	1.02095	11.1244	0.744445	0.44971
chr8	22398371	22398990	3.072	3.058	4.104	6.578	4.63	3.06	5.994	3.836	5.381	6.357	5.107	4.714	1.999	Slc25a15 (-60)	0.860957	10.9786	2.87755	0.518347
chr18	80252587	80253984	5.407	3.082	2.255	4.167	3.549	3.202	6.602	2.134	3.082	5.824	4.341	2.967	2.453	Pqlc1 (-3021)	1.11214	11.7734	0.56916	0.296795
chr1	160212624	160213766	3.758	2.961	3.173	5.155	3.387	3.849	5.891	2.546	5.177	7.163	4.188	2.001	2.596	Cacybp (-303)	1.13448	11.3522	11.025	0.19501
chr4	46388968	46389830	4.263	1.65	3.286	4.291	3.541	2.031	7.083	2.033	3.516	6.248	2.986	1.383	4.375	5830415F09Rik (+24)	1.11462	11.9153	0.103239	0.28843
chr12	72664656	72665710	3.791	2.491	2.977	5.559	3.33	3.679	5.959	2.661	4.957	6.538	4.884	4.524	3.131	Dhrs7 (-355)	1.11319	11.7276	2.20441	0.247288
chr3	89417315	89419233	3.922	2.679	3.539	4.589	3.283	3.283	7.145	2.838	4.216	6.176	4.365	3.613	3.168	Shc1 (-3354), Cks1b (+109)	1.13053	12.4061	11.7401	0.147823
chr11	69900980	69901963	4.297	3.226	2.811	4.06	4.805	3.646	7.844	3.885	5.649	5.616	5.469	4.265	3.511	2810408A11Rik (-515), Neurl4 (-419)	1.13917	11.286	1.19248	0.130766
chr9	21761864	21763173	4.305	1.944	3.188	5.256	2.173	2.267	5.956	2.589	5.6	6.256	4.101	2.796	2.127	Spc24 (-2233)	1.0214	11.841	11.5789	0.458869
chr14	51912397	51913656	4.558	2.51	3.149	5.971	3.517	3.304	6.121	2.587	6.735	5.112	3.978	3.789	1.514	Ndrg2 (+461)	1.02895	11.2108	0.519922	0.364393
chr4	139967536	139968543	3.255	2.484	2.953	5.396	3.286	3	6.273	2.408	5.326	6.834	4.613	2.173	3.412	Klhdc7a (-14)	1.14501	11.5577	0.537983	0.237213
chr7	101011336	101012244	2.937	4.274	2.739	4.718	3.193	2.065	6.126	2.516	4.701	7.902	3.114	2.73	4.051	P2ry2 (+201)	1.17632	10.9005	2.07462	0.193504
chr5	139380199	139381638	5.224	3.758	3.564	4.677	3.854	5.059	5.349	3.47	5.333	6.274	4.094	3.71	3.528	Gpr146 (-8866), D830046C22Rik (+2699)	0.928842	12.209	11.435	0.293261
chr5	123138948	123142062	4.594	2.07	2.689	4.706	4.021	3.91	6.709	4.197	5.094	5.511	4.726	3.909	3.968	Setd1b (-1688)	0.962827	11.9182	0.112539	0.37113
chr5	90640294	90642059	4.82	2.719	1.652	4.629	3.156	3.823	5.743	4.746	4.843	6.326	3.875	4.243	2.36	Rassf6 (-690)	0.868862	11.6514	0.845372	0.595549
chr15	10981287	10982244	4.731	2.134	3.113	6.011	2.449	3.282	4.733	3.567	6.151	6.038	4.012	3.183	2.183	Amacr (+10)	0.908791	11.4423	0.0929672	0.521104
chr9	51963238	51964015	5.191	2.406	2.215	7.12	2.784	3.749	5.091	3.496	5.586	4.103	2.755	4.106	2.854	Fdx1 (-94)	1.08291	11.489	11.2373	0.126853
chr12	51347760	51348611	3.85	2.122	3.452	5.543	2.838	2.579	6.137	5.36	5.18	5.971	4.397	2.864	1.382	G2e3 (-102)	1.0292	12.9191	11.7355	0.299161
chr10	34019334	34020126	2.859	3.166	1.975	7.048	3.495	3.534	6.984	3.131	4.887	4.593	5.239	3.375	2.426	Rwdd1 (-106)	0.84119	11.2765	1.14853	1.08132
chr7	46843843	46845985	4.131	2.851	2.659	5.065	3.079	3.348	6.162	2.825	5.766	6.113	5.123	3.618	4.034	Ldha (-2217)	1.06328	11.3865	0.620212	0.283962
chr11	32642216	32642877	2.553	2.465	2.934	6.556	3.973	2.819	6.304	2.205	5.75	5.995	2.842	4.813	0.5838	Fbxw11 (-328)	0.952899	11.2986	1.15374	0.724996
chr15	99391915	99393012	3.858	2.147	2.068	3.545	3.235	2.365	6.56	2.792	6.051	7.368	3.199	2.945	2.059	Tmbim6 (-418)	1.05453	10.9446	1.95192	0.371611
chr1	13660214	13661026	3.246	2.319	1.153	5.643	3.204	3.221	6.876	4.476	6.112	5.492	4.865	1.815	2.847	Lactb2 (-74)	0.944512	11.1866	1.38198	0.511413
chr5	76951293	76952911	4.628	2.717	3.046	4.961	2.544	4.124	7.48	4.061	5.613	4.142	3.612	4.78	2.666	Ppat (-524), Paics (+795)	0.990477	11.4294	11.0992	0.282197
chr14	29977923	29978663	5.206	2.531	3.028	5.399	3.453	3.959	5.782	3.192	4.88	4.805	3.69	4.662	2.265	Actr8 (-44)	0.924445	11.3208	0.482073	0.483849
chr3	96244374	96246600	4.73	2.725	4.035	5.213	4.391	4.599	6.24	3.113	5.931	4.993	3.918	3.701	3.34	Hist2h3c1 (-1198), Hist2h2aa1 (-51)	1.04425	11.7621	11.4606	0.282818
chr6	29347423	29348382	5.544	2.621	2.351	4.051	3.801	3.331	5.004	3.708	4.198	6.561	5.348	2.925	3.809	Calu (-203)	1.08326	11.8165	1.11123	0.171095
chr14	32084491	32086060	4.282	1.927	2.059	4.19	2.771	3.302	7.112	2.535	4.347	5.544	4.353	2.877	2.588	Oxnad1 (-137), Dph3 (+333)	1.08631	11.8677	11.7912	0.280255
chr18	46740724	46741951	3.493	2.316	1.856	5.115	3.242	3.377	6.587	3.373	5.208	5.873	4.659	3.658	3.191	Ap3s1 (-579), Atg12 (+241)	1.00563	11.4005	0.931064	0.394753
chr7	26168696	26169669	5.757	2.479	1.21	4.687	2.469	2.831	6.477	2.363	4.925	4.063	4.086	2.631	2.028	Cyp2b9 (-4228)	0.935797	11.4138	0.767676	0.798254
chr19	5487980	5488873	4.494	2.198	2.572	4.863	3.523	3.549	5.892	3.298	5.722	5.722	4.42	3.806	4.587	Cfl1 (-2058), Mus81 (-25)	0.996514	10.8943	1.22067	0.346729
chr4	139623911	139625290	3.991	2.237	2.491	4.466	3.101	2.779	5.753	2.483	5.65	6.729	3.881	3.919	2.923	Tas1r2 (-28937), Aldh4a1 (+1735)	1.0795	11.2952	0.742376	0.305181
chr14	21830957	21831873	4.366	2.987	2.81	6.492	3.524	3.858	4.061	3.606	5.566	5.972	5.385	4.774	2.26	Vdac2 (+146)	0.808291	10.6556	1.35081	0.64833
chr4	59003310	59004165	3.674	1.554	3.03	4.734	2.615	3.239	6.564	2.309	4.815	5.887	2.374	2.887	1.844	Gm20503 (+528), Dnajc25 (+566)	1.07418	11.795	11.2712	0.322879
chr18	38249832	38250591	4.314	2.16	2.443	5.247	3.752	2.685	5.173	4.828	5.127	6.122	3.216	4.803	3.191	0610009O20Rik (-37)	1.04611	12.5209	11.9743	0.282588
chr17	65782294	65783104	3.421	3.347	3.245	4.96	4.487	3.368	6.05	3.968	4.294	6.423	3.904	4.095	2.903	Ppp4r1 (-656)	1.09477	11.5637	1.21622	0.213878
chr5	135167763	135169517	4.42	3.177	2.91	5.338	3.852	2.911	6.427	3.847	5.228	4.658	4.549	4.407	1.514	Bcl7b (+357)	0.936875	11.4898	0.947827	0.386907
chr15	11399035	11400138	5.29	2.257	1.798	4.695	3.705	3.048	6.453	2.283	4.526	4.383	3.273	3.713	1.209	Tars (+71)	0.940049	11.3786	0.987146	0.686017
chr7	109984760	109986975	4.616	3.352	3.36	4.888	3.994	3.196	5.804	3.236	4.178	5.506	4.193	4.362	2.996	Tmem41b (+583)	1.04636	11.6116	0.809575	0.216213
chr15	46367894	46367987	1.134	3.752	4.761	15.54	6.258	3.631	2.807	1.131	5.768	1.325	1.898	6.193	5.018	4930548G14Rik (-257515)	0.884828	10.0726	2.70883	1.28699
chr17	35134630	35135770	3.687	2.148	3.375	4.544	4.639	3.443	7.15	2.104	5.829	5.422	5.493	3.095	2.332	Apom (-3150), Bag6 (+22)	1.16231	11.6429	0.140809	0.136931
chr11	94548546	94549742	3.894	2.377	4.17	5.373	4.193	3.722	5.413	3.524	4.621	6.118	3.954	4.822	0.6925	Rsad1 (+55)	1.05556	11.7093	0.502128	0.176446
chr2	144011226	144012645	4.436	3.432	3.633	4.699	3.539	3.156	7.372	3.132	4.012	4.279	4.252	3.7	3.789	Rrbp1 (-673)	1.05351	12.7535	12.7117	0.123601
chr8	4677748	4678773	3.768	1.713	1.985	4.833	2.519	1.901	6.589	2.182	3.942	5.561	2.595	3.204	1.926	Gm7461 (+104)	1.04895	11.5953	0.441792	0.429257
chr9	78104853	78105400	4.55	3.485	1.722	4.981	4.078	3.747	6.023	3.171	5.632	5.193	4.959	4.038	1.583	Fbxo9 (+3938), Gcm1 (+53169)	0.955943	11.148	1.42174	0.498415
chr3	106546759	106547858	3.833	2.316	2.016	4.377	4.456	2.984	5.07	3.543	6.558	7.463	3.048	3.77	4.198	Dram2 (-489), Cept1 (+493)	1.15889	10.7793	1.40804	0.0660174
chr17	26780518	26781344	4.376	2.763	3.38	4.704	3.674	2.747	5.714	1.912	5.565	5.942	5.009	3.364	3.276	Bnip1 (-148)	1.13304	11.7325	0.448941	0.304135
chr9	100544978	100547171	3.736	2.99	3.001	5.366	3.224	2.598	5.869	2.926	4.074	5.759	5.119	3.255	4.278	Nck1 (-22)	1.03514	11.8416	0.271785	0.265174
chr7	111081490	111082267	4.277	3.23	4.389	4.759	3.556	3.431	5.685	3.279	3.492	5.963	4.921	3.468	3.933	Eif4g2 (+1151), Ctr9 (+52928)	1.12945	12.7105	10.8565	0.12704
chr7	19817159	19818539	5.16	2.618	2.582	4.429	3.585	3.594	6.032	3.039	5.214	5.057	3.959	3.376	2.979	Cblc (-21040), Bcl3 (+4921)	0.89411	11.4242	0.954821	0.608775
chr19	23140026	23141277	3.461	1.95	2.45	4.325	2.694	4.2	4.927	3.041	7.833	7.951	5.139	3.107	1.898	Klf9 (-574)	1.09096	10.9315	0.143206	0.231164
chr8	11008983	11012426	5.067	2.943	2.606	4.674	2.998	3.88	5.108	2.637	5.146	5.776	4.318	3.835	2.886	Irs2 (-2247)	1.01581	11.2364	0.463235	0.32948
chr8	27260673	27261464	4.606	1.653	2.114	3.731	2.995	2.344	6.603	2.207	3.907	5.633	4.408	2.522	1.951	Eif4ebp1 (+742)	1.08047	11.9665	11.9608	0.353806
chr7	139212294	139213739	4.163	2.457	2.056	4.773	3.667	2.626	7.116	3.16	4.066	4.51	4.02	2.8	1.806	Lrrc27 (+29)	1.01626	11.6115	0.848206	0.366836
chr2	32961294	32962232	3.427	2.399	2.933	5.426	3.961	2.113	6.173	3.6	3.248	5.463	5.839	2.702	2.552	Lrsam1 (-149), Rpl12 (+204)	0.998213	12.3295	0.21638	0.459097
chr1	183387574	183389135	3.752	2.851	2.274	4.133	3.569	3.616	6.439	3.222	5.861	6.158	3.161	3.099	3.472	Taf1a (-626)	1.12941	11.4341	0.89442	0.283569
chr15	31568044	31568914	4.415	2.162	2.668	4.606	2.917	3.316	4.86	3.232	2.999	6.581	3.475	3.039	1.143	Cmbl (-426)	0.962458	11.5771	10.7607	0.452898
chr15	31568044	31568914	4.415	2.162	2.668	4.606	2.917	3.316	4.86	3.232	2.999	6.581	3.475	3.039	1.143	Cmbl (-426)	1.17952	11.3279	3.25256	0.124099
chr14	30943209	30945099	4.673	2.493	2.587	4.853	2.48	3.62	5.052	3.228	5.498	5.882	3.362	3.447	2.178	Itih1 (-865)	0.964168	11.2189	0.447284	0.426703
chr4	133754007	133755521	4.083	3.239	3.938	5.099	3.974	3.865	5.576	2.742	4.675	5.691	4.298	4.341	3.158	Arid1a (-1153)	1.12669	11.7933	0.140193	0.164136
chr6	120363411	120364728	3.638	3.055	2.748	5.479	3.51	2.919	6.516	3.446	4.393	4.803	4.418	4.355	3.437	Kdm5a (-29)	1.06156	13.3108	11.4613	0.231107
chr17	55944711	55945353	3.323	1.072	2.353	5.586	3.043	2.754	4.265	2.621	2.885	7.223	3.337	2.76	3.226	Zfp119b (+142)	1.0611	12.1722	11.4679	0.390138
chr17	34836570	34837602	3.31	2.416	3.633	5.208	3.264	2.804	6.482	1.917	5.977	5.385	3.202	3.334	2.964	Stk19 (-141), Dom3z (+67)	1.14901	11.5289	0.0569104	0.23053
chr19	60580942	60582510	4.705	2.044	2.572	4.845	3.146	3.954	5.73	2.801	5.637	5.098	2.664	3.202	2.196	Cacul1 (-703)	1.0576	10.645	1.69114	0.266779
chr10	8885780	8886329	3.636	2.09	4.516	5.253	3.19	3.801	6.367	2.353	5.278	5.103	4.065	3.031	2.836	Sash1 (+15)	1.00469	12.1154	10.8846	0.430247
chr4	150007840	150008913	3.778	3.107	3.54	5.348	4.827	3.493	4.953	3.26	4.797	6.271	4.902	4.725	3.706	H6pd (+646)	1.03311	11.1595	1.44542	0.106949
chr14	34357231	34357955	4.295	1.823	1.473	4.381	2.414	3.175	5.19	1.07	5.702	6.443	2.947	2.28	1.904	Fam25c (-2160)	1.14357	11.172	0.462248	0.341681
chr15	9072624	9073656	5.23	2.242	4.065	4.676	2.933	3.243	4.787	2.035	3.75	5.603	2.965	3.756	1.757	Nadkd1 (+1880), Skp2 (+67311)	1.04996	12.0352	11.4212	0.296272
chr1	132007996	132008938	4.128	2.054	4.284	5.007	3.436	3.714	6.227	3.584	3.672	4.917	5.548	4.103	3.692	Elk4 (+860)	1.01393	13.2231	11.3633	0.307659
chr9	106446828	106448298	3.579	2.229	2.07	4.863	3.286	3.571	5.96	3.452	6.289	5.867	3.196	2.634	2.515	Abhd14b (-1077), Abhd14a (+115)	1.03764	10.7356	1.38773	0.335057
chr9	45041267	45043388	4.183	2.398	2.542	4.13	3.37	3.51	6.213	2.685	4.071	5.691	3.563	3.525	2.918	Mpzl2 (-97)	1.12987	11.799	11.7369	0.185339
chr3	122894917	122895822	4.7	1.195	3.317	4.937	3.823	3.962	5.763	2.29	5.358	4.796	5.215	3.622	2.276	Fabp2 (+298)	0.953344	11.9295	11.1781	0.459168
chr18	64343885	64346381	4.523	2.308	3.202	4.784	3.221	3.163	5.784	2.761	4.552	5.054	3.624	3.703	3.598	Onecut2 (+4769), Fech (+143933)	0.996621	11.6378	0.125736	0.339016
chr15	98533474	98534417	4.085	2.093	2.469	4.734	2.745	3.055	5.203	3.389	4.613	6.086	3.293	3.903	2.502	Kansl2 (+275)	0.995865	11.8636	11.7756	0.354475
chr1	105989030	105990910	4.053	2.416	2.948	5.359	3.568	3.805	5.812	3.494	5.345	4.838	4.069	4.532	3.942	Zcchc2 (-719)	0.885184	10.7188	1.52272	0.559087
chr1	184811106	184811826	2.532	2.306	2.774	4.198	4.382	2.765	7.102	2.932	6.123	6.215	3.319	2.697	2.122	Marc1 (-153)	1.03912	10.8814	2.3434	0.334443
chr12	112587014	112588260	4.347	1.539	2.485	4.704	3.332	2.734	6.239	1.801	6.321	4.73	3.427	2.245	2.673	Inf2 (-1147)	1.05404	10.9226	0.887466	0.394666
chr16	49854488	49855584	4.582	1.808	2.438	4.426	3.144	3.643	5.064	3.347	4.217	5.892	4.785	3.93	3.225	Cd47 (-582)	1.06382	12.6111	11.1456	0.18169
chr12	86887791	86891249	3.859	2.629	2.833	4.072	3.678	3.666	6.551	3.019	6.532	5.475	4.061	3.552	3.743	Irf2bpl (-4706)	1.11663	11.3672	0.648657	0.210178
chr17	56218564	56220997	4.123	3.25	2.558	4.833	3.294	3.417	5.63	2.93	3.418	5.346	3.762	3.118	2.168	Dpp9 (-892)	1.0925	11.7984	1.20525	0.15824
chr2	181863963	181864784	5.185	3.039	3.376	4.087	2.624	3.182	5.454	2.326	4.321	5.204	3.54	2.443	4.084	Polr3k (+37)	1.10766	12.065	11.2478	0.213337
